# Supplementary material for: Genetic Diversity of Botrytis cinerea Revealed by Multilocus Sequencing, and Identification of B. cinerea Populations Showing Genetic Isolation and Distinct Host Adaptation
Source: PubMed Central journal article supplement (PMC8131559; doi:10.3389/fpls.2021.663027), 2021-05-05
Supplement: Data_Sheet_2.pdf [file Data_Sheet_2.pdf]

CTGGCCGGCACAAATTCAAAAGTCTCGAGGCTAGCACATTTTCTATGTACCTGGCTGCTGTGACGAGCATGACAAATGAAGAGTGCCTTGAGCT  
TTTAAATGAAGAAAGACAGATTTTAGTAACAAGGTACAAAACCTGCGACTGAGATTGCTCTTCAAGAATCAGATTTTCTTAATAGTGTAGAAAT  
ATTACTTTACAAGCTTTAATAATGTATATCGTAAGTATTTCTCTCTCAGCATCTTGGATGATGGTTTTATGATGATGATGATGTTTTATGTACTT  
TCACAGACAGCTATGCGCGCTCATGATCGAAGTCGATCTACATGGGCATTTATCGGTCCTGTCAGTCCGCCCTTGCCCGTGGCATCGGGCTCCACA  
GGGATGGCACC GGCTCCACAGAGATGGCAGCAAGCAACCTTTTCGATGTGAAAATGCGAAGGAGAATATGGTGGACATTGATTGTACTTGATAC  
AAGAGCTTCCGAAGATCGGGGCACGAAACTATGATCACGGATGGCTCTTTTCGATACAAAAGATGCCTGCCAATATAAATGACGAGGATATATCG  
ATAAACTCAAAAACCTCAGCGGTGATCGGTTAGGATTCACCAGTATGACCTTTGCTTGCATTACAATGACAGCCAGCGGGATCGGATTGAAGA  
TGAATTTTGTACCTACGCGCTTAGACGCGCCAGTCTTGACCACAGAACAAAAAGAGCAGATGATCAAAGGATTTACTGACAAAGTCGATTCTAC  
CTATCTCACATGTTCTGATCCCAATGATCCAAGATTGTGGTGGTTTTGTCGGGTATCACGACTATTATCGCTCAAGTTATGGTTGGCGACACAA  
TATCCACTTCAGCGAAGGAAATCTACAAATCGAGTGTCTTCTCGAGGACAATCCTTGCCTACAGCTATGGCATTTCTTAAATTTGGCGGAAGAAA  
TATGGCAATATGAACCTTCAAAGGGATGGTTCTGGTTCTTTTACAGTTATGTGCCGTGGCATGCAATTGCCGTTGCTTTAGCTGAGCTTTGCGC  
GGAACCAACTGGCCCTCTTGCCGATCAAGCTTGGGGGAGTATCGAGTTTCATTACAATAAATGGAGTGAACCTCGTTGCAGATACAAAAGATGGG  
GTGATTTGGCGGCCAGTCAAGAATTTAATGAAAAGAGCAAAAGCAGCAAGAAGGCGAGAAAGAGGTCTCAGTGGATCTCAAGCATCAACAACCTC  
CAACGGCAATTTCAACCCTAATACATACAGCCCAGCTCTCGATCTAGGTGCTGAATTTCTACCAATCATGTCCGAGAATAATAACTACCGTCA  
ACCTTCTACAATTTGGGCAGGTTGACCCAATGGGGCAGAATATTTACGGGGGGATGAGCTTTCGATCTTCCCATGCCCATGTGTTCTACCCCTCA  
GACACGAATATGGCATCCCCACTACCTATGCCGGACGGCTACACAAATCCGCACTGGAACGAATTCATATTTGGTTTAGGAACAGTTGGTAGTG  
ATGGACTCCAAAATCCAGA

>Bcin05g01790(mrr1), partial sequence [organism=Botrytis cinerea, strain C12\_S\_E7\_2]

CAGGCATCTGGCACGGAATGCATTTTCCCTACACGTGTTCGGAACCCAAAGACCGAGACAAAGCAATCCAAAGTCTCGTGATTCTGAGCTATTAA  
AAAGAATCTCTCACCTCGAAAGTTTGGTGAGCAGAATTGATGCCTCAAACTCCTTGGGGAGGATGGTCAGGTAGAAGACGAGGTTCCGGTCAAA  
TCCACCATCATCAGGACCGCGACCTCATCGTTCTTTACGTCCTCAGACCACCAATACAATGACAATCATCATGAGTTCGGAATAGTACCAGGT  
CGTATGGCTCATCAATTTGCTGATTTTATTAAACGCCAAGAGACTGACTCGATTTACACCCATGATGGATTTTGGACAAGACTAAGTGAAGAAA  
TTGATGGATTGAAAACGCTCATCGAGAGCCCCAGTGACGATGAAGATGAAAATTTGCGGTCCACTGCAACTTCGCCAGCATCCAAGTATGACTC  
CCCTTACAGTTTGTCTTTGATTCAGGGTCACTTCTCGAATGTCACAATTCATATCCATCCCACGACCATACGAAAGTTTTATTCGATATT  
TATTTCAAAAATGTACATCCGATGGTCGTCACTATGCACAAGTCAACAACGTACCTTTTACAAAACCCAAATTTCTGAGTTACTCGATGAGAATA  
CTGGCCGGCACAAATTCAAAAGTCTCGAGGCTAGCGCATTTTCTATGTACCTGGCTGCTGTGACGAGCATGACAAATGAAGAGTGCCTTGAGCT  
TTTAAATGAAGAAAGACAGATTTTAGTAACAAGGTACAAAACCTGCGACTGAGATTGCTCTTCAAGAATCAGATTTTCTTAATAGTGTAGAAAT  
GTTACTTTACAAGCTTTAATAACGTATATCGTAAGTATTTCTCTCTCAGCATCTTGGATGATGGTTTTATGATGATGATGATGATGATGTTTTAT  
GTACTTTACAGGCAGCTATGCGCGCTCATGATCGAAGTCGATCTATATGGGCTTTTATCGGTCCTGTCAGTCCGCCCTTGCCCGTGGCATCGGGC  
TCCACAGGGATGGCACC GGCTCCACAGAGATGGCAGCAAGCAACCTTTTCGATTTGAAAATGCGAAGGAGAATATGGTGGACATTGATTGTACT  
TGATACAAGAGCTTCCGAAGATCGGGGTACGAAACCATGATCACGGATGGCTCTTTTCGATACAAAAGATGCCTGCCAATATAAATGACGAGGAT  
ATATCGATAAACTCAAAAACCTTACC GGTCGATCGGTTAGGATTCACCAGTATGTCCTTTGCTTGCATTACAATGACAGTACGCGGGATCGGAT  
TGAGGATGAATTTTGTACCTACGCGCTTAGACGCGCCGGTCTTGACCACAGAACAAAAAGAGCAGATGATCAAAGGATTTACTGACAAAGTCGA  
TTCTACCTATGTCACATGTTCTGATCCCAATGATCCAAGATTGTGGTGGTTTTTCTCGGGTATCACGACTATTATCGCTCAAGTTATGGTTGGCG  
ACACAATATCCACTTCAGCGAAGGAAATCTACAAATCGAGTGTCTTCTCGGGGACAATCCTTGCCTACAGCTATGGCATTTCTTAAATTTGGCGG  
AAGAAAATATGGCAATATGAACCTTCAAAGGGATGGTTCTGGTTCTTTCAAAGTTATGTGCCGTGGCATGCAATTGCCGTTGCTTTAGCTGAGCT  
TTGCGCGGAACCAACTGGCCCTCTTGCCGATCAAGCTTGGGGGAGCATCGAGTTTCATTACAATAAATGGAGTGAATTCGTTGCAGATACAAA  
GATGGGATGATTTGGCGGCCAGTCAAGAATTTAATGAAAAGAGCAAGAGCAGCAAGAAGGCGAGAAAGAGGTCTCAGTGAATCTCAAGCATCAA  
CAACTCCAACGGCAATTTCTCAACCCTAATACATACAGCCCAGCTCTCGATCTAGGTGCTGAATTTCTACCAATCATGTCCGAGAATAATAACTA  
CCGTCAACCTTCTACAATTTGGGCAGGTTGACCCAATGGGGCAGAATATTTACGGGGGGATGAACTTCGATCTTCCCATGCCCATGTGTTCTACC  
CCCTCAGACACGAATATGGCATCCCCACTACCTATTCGGGACGGCTATACAAATCCGCACTGGAACGAATTCATATTTGGTTTAGGAACAGTTG  
GTAGCGATGGACCCAAAATCCAGA

>Bcin05g01790(mrr1), partial sequence [organism=Botrytis cinerea, strain C12\_S\_E7\_4]

CAGGCATCTGGCACGGAATGTATTTTCCCTACACGTGTTCGGAACCCAAAGACCGAGACAAAGCAATCCAAAGTCTCGTGATTCTGAGCTATTAA  
AAAGAATCTCTCATCTCGAAAGTTTGGTGAGCAGAATTGATGCCTCAAACTCCTTGGGGAGGATGGTCAGGTAGAATACGAGGTTCCGGTCAAA  
TCCGCCATCATCAGGACCGCGACCTCATCGTTCTTTACGTCCTCAGACCATCATGAGTTTGGAAATAGTACCAGGTCGTATGGCTCATCAATTT  
GCTGATTTTATTAAACGCCAAGAGAACGACTCGATTTACACTCATGATGGATTTTGGACAAGACTAAGTGAAGAAAATGATGGATTGAAACAGC  
TCATCGAGAGCCCCAGTGACGATGAAGATGAAAATTTCTGGGTCCACTGCAACTTCGCCAGCATCCAAGTATGACTCTCTTACAGTTTGTCTT  
TGATTCCAGGGTCACTTCTCGAATGTCATAATTCATATCCATCCCACGACCATACCAAAGTTTTATTCGATATTTATTTCAAAAATGTACAT  
CCGATGGTCGTCACTATGCACAAGCCAACAACGTACCTTTTACAAAACCCAAATTTCTGAGTTACTCGATGAGAATACTGGCCGGCACAAATTC  
AAAGTCTCGAGGCTAGCGTGTTTGCTATGTACCTGGCTGCTGTGACGAGCATGACAAAATGAAGAGTGCCTTGAGCTTTTAAATGAAGAAAGAAA  
TATTTTAGTAACACGGTACAAAACCTGCGACTGAGATTGCTCTTCAAGAATCAGATTTTCTTAATAGTGTGAAATTTGTTACTTTACAAGCTTTA  
ATAACGTATATCGTAAGTGTCTCTCTAAGCATCTTGGATGATGGTTTTATGATGATGATGATGATGATGTTTTATGTACTTTACAGGCAGCT  
ATGCGCACTCATGATCGAAGTCGATCTATATGGGCATTTATCGGTCCTGTCAGTCCGCCCTTGCCCGTGGCATCGGGCTCCACAGAGATGGCAGC  
AGCAACCTTTTCGATTTGAAAATGCGAAGGAGAGTGTGGTGGACATTGATTGTACTTGATACAAGAGCTTCCGAAGATCGGGGTACAGAAACCAT  
GATCACTGATGGCTCTTTTCGATACAAAAGATGCCTGCCAACATAAACGACGAGGATATGATGATAAACTCAAAAAGTCTACC GGTCGATCGGATA  
GGGATCACCAGTATGACCTTTGCTTGCATTACAATGACAGTACGCGGGATCGGATTGAGGATGAATTTTGTACCTACGCGCTTAGACGCGCCG

TCTTGACCACAGAACAAAAAGAGCAGATGATCAAAGGATTTACTGACAAAATCGATTTCTACCTATCTCGCAGGTTCTGATCCCAATGATCCAAG  
ATTGTGGTGGTATTGTTCGGATATCACGACTATTATCGCTCAAGTTATGGCTGGTGACACAATATCCACTTCAACGAAGGAAATCTACAAATCGA  
GTGCTTCTTCGAGGACAATCCTTGGCTACAGCTATGGCATTCTTAAATTTGGCGGAAGAAATATGGCAATATGAACCTTCAAAGGGATGGTTCT  
GGTTCTTTCAAAGTTATGTGCCGTGGCATGTAATTCGCGTTGCTTTAGCTGAGCTTTGTGCGGAACCAACTGGCCCTCTTGCCGATCAAGCTTG  
GGAGGGCATTGAGTTTCACTACAATAAATGGAGTGAATTCGTTGCAGATACAAAAGATGGGATGATTTGGCGACCAGTCAGGAATTTAATGAAA  
AGAGCAAGAGCAGCAAGAAGGCGAGAAAAGAGGTTCTCAGTGAATCTCAAGCATCAACAACCTCCAACGGCAATTCGCAACCCTAATACATACAGCC  
CAGCTCTCAATCTAGCTGCTGGATGCTCCCGATCATGTCCGAGAACAAATACTACTGTCAATCTTCTACAATTTGGACAGGTTGACCCAATGGG  
GCAGAATATTTACGGGGGAATGGGCTTCGATCTTCCCATGCCCATGGGTTCTACCCCCCTCAGACACGAATATGGCATCCCCACTACCTATTCGG  
GACGGCTATACAAAATCCGCACTGGAACGAATTCATATTTGGTTTAGGACCAGTTTGTAGCGATGGACCCCAAAATCCAGA

>Bcin05g01790(mrr1), partial sequence [organism=Botrytis cinerea, strain D08\_H\_8\_6]

CAGGCATCTGGCACGGAATGCATTTTCCCTACACGTGTTTCGGAACCCAAGACCGAGACAAAGCAATCCAAAGTCTCGTGATTTCTGAGCTATTAA  
AAAGAATCTCTCACCTCGAAAAGTTTGGTGAGCAGAATTTGATGCCCTCAAACCTCCTTGGGGAGGATGGTCAGGTAGAAGACGAGGTTCCGGTCAA  
TCCACCATCGTCAGGACCGCGACCTCATCGTTCTTTCAGTCTCCAGACCACCAATACAATGACAATCATCATGAGTTCCGGAATAGTACCAGGT  
CGTATGGCTCATCAATTTGCTGATTTTATCAAACGCCAAGAGACCGACTCGATTTACACCCATGATGGATTTTGGACAAGACTAAGTGAAGAAA  
TTGATGGATTGAAAACAGCTCATCGAGAGCCCCAGTGACGATGAAGATGAAAAATCTGGGTCCACTGCAACTTCGCCAGCATCCAAGTATGACTC  
CCCTTACAGTTTGTCTTTGATTCAGGGTCACTTCTTCAATGTCACAATTCATATCCATCCCACGACCATACGAAAAGTTTTATTCGATATT  
TATTTCAAAAATGTACATCCGATGGTCTGCTACTATGCACAAGCCAACAACGTACCTTTTACAAAACCCAAATTTCTGAGTTACTCGATGAGAATA  
CTGGCCGGCACAAAATTCAAAAGTCTCGAGGCTAGCGCATTTTCTATGTACCTGGCTGCTGTGACGAGCATGACAAAATGAAGAGTGCCTTGAGCT  
TTTAAATGAAGAAAAGACAGATTTTAGTAACAAGGTACAAAACCTGCGACTGAGATTGCTCTTCAAGAATCAGATTTTCTTAAATAGTGTAGGAAT  
GTTACTTTACAAGCTTTGATAACGTATATCGTAAGTATTTCTCTCTCAGCATCTTGAATGATGGTTTTATGATGATGATGATGATGTTTTATGTA  
CTTTACAGGCAGCTATGCGCGCTCATGATCGAAGTCGATCTACATGGACATTTATCGGTCTTGCAGTCCGCCCTTGCCCGTGGCATCGGGCTCC  
ACAGGGATGGCACCGGGCTCCACAGAGATGGCAGCAAGCAACCTTTCGATTTGGAAATGCGAAGGAGACTATGGTGGACATTGATTGTACTTGA  
TACAAGAGCTTCCGAAGATCGGGGTACGGAACTATGATCACTGATGGCTCTTTCGATACAAAGATGCCTGCCAATATAAATGATGAGGATATA  
TCGATAAACTCAAAAATCTACCGGTCGATCGGCTAGGATTAACCAGTATGACCTTTGCTTGCATTACAATGACAGTCAGCGGGATCGGATTGA  
GGATGAATTTTGTACCTACGCGCTAGACGCGCCGGTCTTGACCACAGAACAAAAAGAGCAGATGATCAAAGGATTTACTGACAAAATCGATTC  
TACCTATGTACATGTTCTGATCCCAATGATCCAAGATTTGTTGGTGGTTTTGTGCGGGTATCACGACTATTTATCGCTCAAGTTATGGTTGGCGACA  
CAATATCCACTTCAGCGAAGGAAATCTACAAAATCGAGTGTCTCCTCGAGGACAATCCTTGCCTACAGCTATGGCATTTCTTAAATTTGGCGGAAG  
AAATATGGCAATATGAACCTTCAAAGGGATGGTTCTGGTTCTTTCAAAGTTATGTGCCGTGGCATGCAATTCGGGTGCTTTTAGCTGAGCTTTG  
TGCGGAACCAACTGGCCCTCTTGCCGATCAAGCTTGGGGGAGCATCGAGTTTCAATTACAATAAATGGAGTGAATTCGTTGCAGATACAAAAGAT  
GGGATGATTTGGCGGCCAGTCAAGAATTTAATGAAAAGAGCAAAAAGCAGCAAGAAGGCGAGAAAGAGGTCTCAGTGAATCTCAAGCATCAACAA  
CTCCAACGGCAATTTCTCAACCCTAATACATACAGCCAGCTCTCGATCTAGGTGCTGAATTTCTACCAATCATGTCCGAGAAATAAATACTACCG  
TCAACCTTCTACAATTTGGGCAGGTTGACCCAATGGGGCAGAATATTTACGGGGGGATGAGCTTCGATCTTCCCATGCCATGTGTTCTACCCCC  
TCAGACACGAATATGGCATCCCCACTACCTATTCGGGACGGTTATACAAAATCCGCACTGGAACGAATTCATATTTGGTTTAGGAACAGTTGGTA  
GCGATGGACCCCAAGATCCAGA

>Bcin05g01790(mrr1), partial sequence [organism=Botrytis cinerea, strain D09\_K\_2\_3]

CAGGCATCTGGCACGGAATGCATTTTCCCTACACGTGTTTCGGAACCCAAGACCGAGACAAAGCAATCCAAAGTCTCGTGATTTCTGAGCTATTAA  
AAAGAATCTCTCACCTCGAAAAGTTTGGTGAGCAGAATTTGATGCCCTCAAACCTCCTTGGGGAGGATGGTCAGGTAGAAGACGAGGTTCCGGTCAA  
TCCACCATCATCAGGACCGCGACCTCATCGTTCTTTCAGTCTCCAGACCACCAATACAATGACAATCATCATGAGTTCCGGAATAGTACCAGGT  
CGTATGGCTCATCAATTTGCTGATTTTATTAACGCCAAGAGACTGACTCGATTTACACCCATGATGGATTTTGGACAAGACTAAGTGAAGAAA  
TTGATGGATTGAAAACAGCTCATCGAGAGCCCCAGTGACGATGAAGATGAAAAATCTGGGTCCACTGCAACTTCGCCAGCATCCAAGTATGACTC  
CCCTTACAGTTTGTCTTTGATTCAGGGTCACTTCTTCAATGTCACAATTCATATCCATCCCACGACCATACGAAAAGTTTTATTCGATATT  
TATTTCAAAAATGTACATCCGATGGTCTGCTACTATGCACAAGTCAACAACGTACCTTTTACAAAACCCAAATTTCTGAGTTACTCGATGAGAATA  
CTGGCCGGCACAAAATTCAAAAGTCTCGAGGCTAGCGCATTTTCTATGTACCTGGCTGCTGTGACGAGCATGACAAAATGAAGAGTGCCTTGAGCT  
TTTAAATGAAGAAAAGACAGATTTTAGTAACAAGGTACAAAACCTGCGACTGAGATTGCTCTTCAAGAATCAGATTTTCTTAAATAGTGTAGAAAT  
GTTACTTTACAAGCTTTAATAACGTATATCGCAGCTATGCGCGCTCATGATCGAAGTCGATCTATATGGGCTTTTTATCGGTCTTGCAGTCCGCC  
TTGCCCGTGGCATCGGGCTCCACAGGGATGGCACCAGGCTCCACAGAGATGGCAGCAAGGAACCTTTTCGATTTGGAAATGCGAAGGAGAATATG  
GTGGACATTGATTGTAATTTGATAACAAGAGCTTCCGAAGATCGGGGTACGGAAACCATGATCACGGATGGCTCTTTCGATACAAAAGATGCCGTC  
AATATAAATGACGAGGATATATCGATAAACTCAAAAACCTACCGGTCGATCGGTTAGGATTCACCAGTATGACCTTTGCTTGCATTACAATGA  
CAGTCAGCGGGATCGGATTGAGGATGAATTTTGTACCTACGCGCTAGACGCGCCGGTCTTGACCACAGAACAAAAAGAGCAGATGATCAAAGG  
ATTTACTGACAAAAGTCGATTTCCACCTATGTCACATGTTCTGATCCCAATGATCCAAGATTTGTGGTGGTTTTCTCGGGTATCACGACTATTTATCG  
CTCAAGTTATGGTTGGCGACACAATATCCACTTCAGCGAAGGAAATCTACAAAATCGAGTGTCTTCTCGGGGACAATCCTTGCCTACAGCTATGG  
CATTCTTAAATTTGGCGGAAGAAAATATGGCAATATGAACCTTCAAAGGGATGGTTCTGGTTCTTTCAAAGTTATGTGCCGTGGCATGCAATTCG  
GGTTGCTTTAGCTGAGCTTTGCGCGGAACCAACTGGCCCTCTTGCCGATCAAGCTTGGGGGAGCATCGAGTTTCAATTACAATAAATGGAGTGAA  
TTCGTTGCAGATACAAAAGATGGGATGATTTGGCGGCCAGTCAAGAATTTAATGAAAAGAGCAAGAGCAGCAAGAAGGCGAGAAAGAGGTCTCA  
GTGAATCTCAAGCATCAACAACCTCCAACGGCAATTTCTCAACCCTAATACATACAGCCAGCTCTCGATCTAGGTGCTGAATTTCTACCAATCAT  
GTCGGAGAATAAATACTACCGTCAACCTTCTACAATTTGGGCAGGTTGACCCAATGGGGCAGAATATTTACGGGGGGATGAACCTTCGATCTTCCC  
ATGCCATGTGTTCTACCCCTCAGACACGAATATGGCATCCCCACTACCTATTCGGGACGGCTATACAAAATCCGCACTGGAACGAATTCATAT

TTGGTTTAGGAACAGTTGGTAGCGATGGACCCCAAAATCCAGA

>Bcin05g01790(mrr1), partial sequence [organism=Botrytis cinerea, strain D09\_K\_4\_1]

CAGGCATCTGGCACGGAATGCATTTTCCCTACACGTGTTTCGGAACCCAAGACCGAGACAAAGCAATCCAAAGTCTCGTGATTCTGAGCTATTAA  
AAAGAATCTCTCACCTCGAAAAGTTTGGTGAGCAGAAATGATGCCCAAACTCCTTGGGGAGGATGGTCAGGTAGAAGACGAGGTTCCGGTCAAA  
TCCACCATCATCAGGACCGCGACCTCATCGTTCTTTACAGTCTCCAGACCACCAATACAATGACAATCATCATGAGTTCGGAATAGTACCAGGT  
CGTATGGCTCATCAATTTGCTGATTTTATTAACGCCAAGAGACCGACTCGATTTACACCCATGATGGATTTTGGACAAGACTAAGTGAAGAAA  
TTGATGGATTGAAAACAGCTCATCGAGAGCCCCAGTGACGATGAAGATGAAAATTTCTGGGTCCACTGCAACTTCGCCAGCATCCAAGTATGACTC  
CCCTTACAGTTTGTCTTTGATTCCAGGGTCACTTCTCGAATGTCACAATTCATATCCATCCCACGACCATACGAAAGTTTTATTCGATATT  
TATTTCAAAAATGTACATCCGATGGTTCGTCACATGACAAAGTCAACAACGTACCTTTTACAAAACCCAAATTTCTGAGTTACTCGATGAGAATA  
CTGGCCGGCACAAATTCAAAAGTCTCGAGGCTAGCTCATTTTCTATGTACCTGGCTGCTGTGACGAGCATGACAAATGAAGAATGCCTTGAGCT  
TTTAAATGAAGAAAAGACAGATTTTAGTAACAAGGTACAAAACCTGCGACTGAGATTGCTCTTCAAGAATCAGATTTTCTTAATAGTGTAGAAAT  
GTTACTTTACAAGCTTTAATAACGTATATCGCAGCTATGCGCGCTCATGATCGAAGTCGATCTATATGGGCATTTATCGGTCTTGCAGTCCGCC  
TTGCCCGTGGCATCGGGCTCCACAGGGATGGCACCAGGCTCCACAGAGATGGCAGCAAGAACCTTTCGATTTGGAAATGCGAAGGAGAATATG  
GTGGACATTGATTGTAATTTGATAACAAGACTTCCGAAGATCGGGGTACGAAACTATGATCAGGATGGCTCTTTCGATACAAAGATGCCCTGCC  
AATATAAATGACGAGGATATAACGATAAACTCAAAAACCTTACCAGTTCGATCGGTTAGGATTCACCAGTATGACCTTTGCTTGCATTACAATGA  
CAGTCAGCGGGATCGGATTGAGGATGAATTTTGTACCTACGCGCTTAGACGCGCCGGTCTTGACCACAGAACAAAAAGAGCAGATGATCAAAGG  
ATTTACTGACAAAAGTTGATTTCTACCTATGTCACATGTTCTGATCCCAATGATCCAAGATTTGTGGTGGTTTTCTCGGGTATCACGACTATTATCG  
CTCAAGTTATGGTTGGCGACACAATATCCACTTCAGCGAAGGAAATCTACAAATCGAGTGTCTTCTCGGGGACAATCCTTGCCTACAGCTATGG  
CATTCTTAAATTTGGCGGAAGAAAATATGGCAATATGAACCTTCAAAGGGATGGTCTCGTTCTTCCAAAGTTATGTGCCGTGGCATGCAATTCG  
GGTTGCTTTAGCTGAGCTTTGCGCGGAACCAACTGGCCCTCTTGCCGATCAAGCTTGGGGGAGTATCGAGTTTCATTACAATAAATGGAGTGAA  
TTCGTTGCAGATACAAAAGATGGGATGATTTGGCGGCCAGTCAAGAATTTAATGAAAAGAGCAAAAGCAGCAAGAAGGCGAGAAAGAGGTCTCA  
GTGAATCTCAAGCATCAACAACCTCAACGGCAATTTCTCAATCCTAATACATACAGCCAGCTCTCGGTCTAGGTGCTGAATTTCTACCAATCAT  
GTCGGAGAATAAATAACTACCGTCAACCTTCTACAATTTGGGCAGTTGATCCAATGGGGCAGAATATTTACGGGGGGATGAGCTTCGATCTTCCC  
ATGCCCATGTGTTCTACCCCTCAGACACGAATATGGCATCCCCACTACCTATTCGGACGGTTATACAAATCCGCACTGGAACGAATTCATAT  
TTGGTTTAGGAACAGTTGGTAGCGATGGACCCAGAATCCAGA

>Bcin05g01790(mrr1), partial sequence [organism=Botrytis cinerea, strain D09\_K\_4\_2]

CAGGCATCTGGCACGGAATGCATTTTCCCTACACGTGTTTCGGAACCCAAGACCGAGACAAAGCAATCCAAAGTCTCGTGATTCTGAGCTATTAA  
AAAGAATCTCTCACCTCGAAAAGTTTGGTGAGCAGAAATGATGCCCAAACTCCTTGGGGAGGATGGTCAGGTAGAAGACGAGGTTCCGGTCAAA  
TCCACCATCGTCAGGACCGCGACCTCATCGTTCTTTACAGTCTCCAGACCACCAATACAATGACAATCATCATGAGTTCGGAATAGTACCAGGT  
CGTATGGCTCATCAATTTGCTGATTTTATCAAAACGCCAAGAGACCGACTCGATTTACACCCATGATGGATTTTGGACAAGACTAAGTGAAGAAA  
TTGATGGATTGAAAACAGCTCATCGAGAGCCCCAGTGACGATGAAGATGAAAATTTCTGGGTCCACTGCAACTTCGCCAGCATCCAAGTATGACTC  
CCCTTACAGTTTGTCTTTGATTCCAGGGTCACTTCTTCCAATGTCACAATTCATATCCATCCCACGACCATACGAAAGTTTTATTCGATATT  
TATTTCAAAAATGTACATCCGATGGTTCGTCACATGACAAAGTCAACAACGTACCTTTTACAAAACCCAAATTTCTGAGTTACTCGATGAGAATA  
CTGGCCGGCACAAATTCAAAAGTCTCGAGGCTAGCGCATTTTCTATGTACCTGGCTGCTGTGACGAGCATGACAAATGAAGAGTGCCTTGGAGCT  
TTTAAATGAAGAAAAGACAGATTTTAGTAACAAGGTACAAAACCTGCGACTGAGATTGCTCTTCAAGAATCAGATTTTCTTAATAGTGTAGAAAT  
GTTACTTTACAAGCTTTGATAACGTATATCGCAGCTATGCGCGCTCATGATCGAAGTCGATCTACATGGACATTTATCGGTCTTGCAGTCCGCC  
TTGCCCGTGGCATCGGGCTCCACAGGGATGGCACCAGGCTCCACAGAGATGGCAGCAAGCAACCTTTCGATTTGGAAATGCGAAGGAGACTATG  
GTGGACATTGATTGTAATTTGATAACAAGACTTCCGAAGATCGGGGTACGAAACTATGATCAGTATGGCTCTTTCGATACAAAGATGCCCTGCC  
AATATAAATGATGAGGATATATCGATAAACTCAAAAACCTTACCAGTTCGATCGGCTAGGATTAACCAGTATGACCTTTGCTTGCATTACAATGA  
CAGTCAGCGGGATCGGATTGAGGATGAATTTTGTACCTACGCGCTTAGACGCGCCGGTCTTGACCACAGAACAAAAAGAGCAGATGATCAAAGG  
ATTTACTGACAAAATCGATTTCTACCTATGTCACATGTTCTGATCCCAATGATCCAAGATTTGTGGTGGTTTTGTGCGGTATCACGACTATTATCG  
CTCAAGTTATGGTTGGCGACACAATATCCACTTCAGCGAAGGAAATCTACAAATCGAGTGTCTTCTCGAGGACAATCCTTGCCTACAGCTATGG  
CATTCTTAAATTTGGCGGAAGAAAATATGGCAATATGAACCTTCAAAGGGATGGTTCGGTTCTTTCAAAGTTATGTGCCGTGGCATGCAATTCG  
GGTTGCTTTAGCTGAGCTTTGTGCGGAACCAACTGGCCCTCTTGCCGATCAAGCTTGGGGGAGCATCGAGTTTCATTACAATAAATGGAGTGAA  
TTCGTTGCAGATACAAAAGATGGGATGATTTGGCGGCCAGTCAAGAATTTAATGAAAAGAGCAAAAGCAGCAAGAAGGCGAGAAAGAGGTCTCA  
GTGAATCTCAAGCATCAACAACCTCAACGGCAATTTCTCAACCTAATACATACAGCCAGCTCTCGATCTAGGTGCTGAATTTCTACCAATCAT  
GTCGGAGAATAAATAACTACCGTCAACCTTCTACCATTTGGGCAGGTTGACCCAATGGGGCAGAATATTTACGGGGGGATGAGCTTCGATCTTCCC  
ATGCCCATGTGTTCTACCCCTCAGACACGAATATGGCATCCCCACTACCTATTCGGACGGTTATACAAATCCGCACTGGAACGAATTCATAT  
TTGGTTTAGGAACAGTTGGTAGCGATGGACCCAGAATCCAGA

>Bcin05g01790(mrr1), partial sequence [organism=Botrytis cinerea, strain D10\_B\_F1\_6]

CAGGCATCTGGCACGGAATGCATTTTCCCTACACGTGTTTCGGAACCCAAGACCGAGACAAAGCAATCCAAAGTCTCGTGATTCTGAGCTATTAA  
AAAGAATCTCTCACCTCGAAAAGTTTGGTGAGCAGAAATGATGCCCAAACTCCTTGGGGAGGATGGTCAGGTAGAAGACGAGGTTCCGGTCAAA  
TCCACCATCATCAGGACCGCGACCTCATCGTTCTTTACAGTCTCCAGACCACCAATACAATGACAATCATCATGAGTTCGGAATAGTACCAGGT  
CGTATGGCTCATCAATTTGCTGATTTTATTAACGCCAAGAGACCGACTCGATTTACACCCATGATGGATTTTGGACAAGACTAAGTGAAGAAA  
TTGATGGATTGAAAACAGCTCATCGAGAGCCCCAGTGACGATGAAGATGAAAATTTCTGGGTCCACTGCAACTTCGCCAGCATCCAAGTATGACTC  
CCCTTACAGTTTGTCTTTGATTCCAGGGTCACTTCTCGAATGTCACAATTCATATCCATCCCACGACCATACGAAAGTTTTATTCGATATT  
TATTTCAAAAATGTACATCCGATGGTTCGTCACATGACAAAGTCAACAACGTACCTTTTACAAAACCCAAATTTCTGAGTTACTCGATGAGAATA

CTGGCCGGCACAAATTCAAAAGTCTCGAGGCTAGCTCATTTTCTATGTACCTGGCTGCTGTGACGAGCATGACAAATGAAGAATGCCTTGAGCT  
TTTAAATGAAGAAAACAGATTTTAGTAACAAGGTACAAAACCTGCGACTGAGATTGCTCTTCAAGAATCAGATTTTCTTAATAGTGTAGAAAT  
GTTACTTTACAAGCTTTAATAACGTATATCTATGCGCGCTCATGATCGAAGTCGATCTATATGGGCATTTATCGGTCTTGCAGTCCGCCCTTGCC  
CGTGGCATCGGGCTCCACAGGGATGGCACC GGCTCCACAGAGATGGCAGCAAGGAACCTTTCGATTTGGAAATGCGAAGGAGAATATGGTGA  
CATTGATTGTACTTGATACAAGAGCTTCCGAAGATCGGGTACGAAACTATGATCACGGATGGCTCTTTCGATACAAAGATGCCTGCCAATAT  
AAATGACGAGGATATAACGATAAACTCAAAAACCTTACC GGTCGATCGGTTAGGATTCACCAGTATGACCTTTCGTTGCATTACAATGACAGTC  
AGCGGGATCGGATTGAGGATGAATATTGTACCTACGCGCTAGACGCGCCGGTCTTGACCACAGAACA AAAAGAGCAGATGATCAAAGGATTTA  
CTGACAAAAGTTGATTCTACCTATGTACATGTTCTGATCCCAATGATCCAAGATTGTGGTGGTTTTCTCGGGTATCACGACTATTATCGCTCAA  
GTTATGGTTGGCGACACAATATCCACTTCAGCGAAGGAAATCTACAAATCGAGTGTCTCCTCGGGGACAATCCTTGCGTACAGCTATGGCATT  
TTAAATTTGGCGGAAGAAATATGGCAATATGAACCTTCAAAGGGATGGTCTGGTCTTCCAAAGTTATGTGCCGTGGCATGCAATTCGGTTG  
CTTTAGCTGAGCTTTGCGCGGAACCAACTGGCCCTCTTGCCGATCAAGCTTGGGGGAGTATCGAGTTTTCATTACAATAAATGGAGTGAATTCGT  
TGCAGATACAAAAGATGGGATGATTTGGCGGCCAGTCAAGAATTTAATGAAAAGAGCAAAAAGCAGCAAGAAGGCGAGAAAGAGGTCTCAGTGAA  
TCTCAAGCATCAACAACCTCCAACGGCAATTTCTCAATCTTAATACATACAGCCAGCTCTCGGTCTAGGTGCTGAATTTCTACCAATCATGTCCG  
AGAATAATAACTACCGTCAACCTTCTACAATTTGGCAGGTTGATCCAATGGGGCAGAATATTTACGGGGGATGAGCTTCGATCTTCCCATGCC  
CATGTGTTCTACCCCTCAGACACGAATATGGCATCCCCACTACCTATTTCCGGACGGTTATACAAATCCGCACTGGAACGAATTCATATTTGGT  
TTAGGAACAGTTGGTAGCGATGGACCCAGAATCCAGA

>Bcin05g01790(mrr1), partial sequence [organism=Botrytis cinerea, strain D10\_B\_F3\_5]  
CAGGCATCTGGCACGGAATGCATTTTCCCTACACGTGTTTCGGAACCCAAGACCGAGACAAAGCAATCCAAAGTCTCGTGATTCTGAGCTATTAA  
AAAGAATCTCTCACCTCGAAAAGTTTGGTGAGCAGAATTGATGCC TCAAAAACCTTGGGGAGGATGGTCAGGTAGAAGACGAGGTTCCGGTCAAA  
TCCACCATCATCAGGACCGCGACCTCATGTTCTTTACGTCCTCAGACCACCAATACAATGACAATCATCATGAGTTCCGGAATAGTACCAGGT  
CGTATGGCTCATCAATTTGCTGATTTTATTAACGCCAAGAGACCGACTCGATTTACACCATGATGGATTTTGGACAAGACTAAGTGAAGAAA  
TTGATGGATTGAAAACAGCTCATCGAGAGCCCCAGTGACGATGAAAGTAAATTTCTGGGTCCACTGCAACTTCGCCAGCATCCAAGTATGACTC  
CCCTTACAGTTTGCTTTGATTCCAGGGTCACTTCTCGAATGTCACAATTCATATCCATCCCACGACCATACGAAAGTTTTATTCGATATT  
TATTTCAAAAATGTACATCCGATGGTCTGCTACTATGCACAAGTCAACAACGTACCTTTTACAAAACCCAAATTTCTGAGTTACTCGATGAGAATA  
CTGGCCGGCACAAATTCAAAAGTCTCGAGGCTAGCTCATTTTCTATGTACCTGGCTGCTGTGACGAGCATGACAAATGAAGAATGCCTTGAGCT  
TTTAAATGAAGAAAACAGATTTTAGTAACAAGGTACAAAACCTGCGACTGAGATTGCTCTTCAAGAATCAGATTTTCTTAATAGTGTAGAAAT  
GTTACTTTACAAGCTTTAATAACGTATATCGCAGCTATGCGCGCTCATGATCGAAGTCGATCTATATGGGCATTTATCGGTCTTGCAGTCCGCC  
TTGCCCGTGGCATCGGGCTCCACAGGGATGGCACC GGCTCCACAGAGATGGCAGCAAGGAACCTTTCGATTTGGAAATGCGAAGGAGAATATG  
GTGGACATTGATTGTACTTGATACAAGAGCTTCCGAAGATCGGGGTACGAAACCATGATCACGGATGGCTCTTTCGATACAAAGATGCC TGCC  
AATATAAATGACGAGGATATATCGATAAACTCAAAAACCTTACC GGTCGATCGGTTAGGATTCACCAGTATGACCTTTGCTTGCATTACAATGA  
CAGTCAGCGGGATCGGATTGAGGATGAATTTTGTACCTACGCGCTAGACGCGCCGGTCTTGACCACAGAACA AAAAGAGCAGATGATCAAAGG  
ATTTACTGACAAAAGTCGATTTCTACCTATGCATGTTCTGATCCCAATGATCCAAGATTGTGGTGGTTTTCTCGGGTATCACGACTATTATCGCTC  
AAGTTATGGTTGGCGACACAATATCCACTTCAGCGAAGGAAATCTACAAATCGAGTGTCTCCTCGAGGACAATCCTTGCCTACAGCTATGGCAT  
TCTTAAATTTGGCGGAAGAAATATGGCAGTATGAACCTTCAAAGGGATGGTCTGGTCTTCCAAAGTTATGTGCCGTGGCATGCAATTCGGGT  
TGCTTTAGCTGAGCTTTGCGCGGAACCAACTGGCCCTCTTGCCGATCAAGCTTGGGGGAGTATCGAGTTTTCATTACAATAAATGGAGTGAATTC  
GTTGCAGATACAAAAGATGGGATGATTTGGCGGCCAGTCAAGAATTTAATGAAAAGAGCAAAAAGCAGCAAGAAGGCGAGAAAGAGGTCTCAGTG  
AATCTCAAGCATCAACAACCTCCAACGGCAATTTCTCAATCTTAATACATACAGCCAGCTCTCGGTCTAGGTGCTGAATTTCTACCAATCATGT  
GGAGAATAATAACTACCGTCAACCTTCTACAATTTGGCAGGTTGATCCAATGGGGCAGAATATTTACGGGGGATGAGCTTCGATCTTCCCATG  
CCCATGTGTTCTACCCCTCAGACACGAATATGGCATCCCCACTACCTATTTCCGGACGGTTATACAAATCCGCACTGGAACGAATTCATATTTG  
GTTTAGGAACAGTTGGTAGCGATGGACCCAGAATCCAGA

>Bcin05g01790(mrr1), partial sequence [organism=Botrytis cinerea, strain D10\_B\_S3\_16]  
CAGGCATCTGGCACGGAATGTATTTTCCCTACACGTGTTTCGGAACCCAAGACCGAGACAAAGCAATCCAAAGTCTCGTGATTCTGAGCTATTAA  
AAAGAATCTCTCATCTCGAAAAGTTTGGTGAGCAGAATTGATGCC TCAAAAACCTTGGGGAGGATGGTCAGGTAGAAGACGAGGTTCCGGTCAAA  
TCCGCCATCATCAGGACCGCGACCTCATGTTCTTTACGTCCTCAGACCACCAATACAATGACAATCATCATGAGTTTGGAAATAGTACCAGGT  
CGTATGGCTCATCAATTTGCTGATTTTATTAACGCCAAGAGACCGACTCGATTTACACTCATGATGGATTTTGGACAAGACTAAGTGAAGAAA  
TTGATGGATTGAAAACAGCTCATCGAGAGCCCCAGTGACGACGAAGATGAAAATTTCTGGGTCCACTGCAACTTCGCCAGCATCCAAGTATGACTC  
TCCTTACAGTTTGCTTTGATTCCAGGGTCACTTCTCGAATGTCATAATTCATATCCATCCCACGACCATACCAAAGTTTTATTCGATATT  
TATTTCAAAAATGTACATCCGACGGTCTGCTACTATGCACAAGCCAACAACGTACCTTTTACAAAACCCAAATTTCTGAGTTACTCGATGAGAATA  
CTGGCCGGCACAAATTCAAAAGTCTCGAGGCTAGCGTGTGTTGCTATGTACCTGGCTGCTGTGACGAGCATGACAAATGAAGAGTGCCTTGAGCT  
TTTAAATGAAGAAAAGAAATATTTTAGTAACACGGTACAAAACCTGCGACTGAGATTGCTCTTCAAGAATCAGATTTTCTTAATAGTGTGAAAT  
GTTACTTTACAAGCTTTAATAACGTATATCGCAGCTATGCGCACTCATGATCGAAGTCGATCTATATGGGCATTTATCGGTCTTGCAGTCCGCC  
TTGCCCGTGGCATCGGGCTCCACAGAGATGGCAGCCAGCAACCTTTCGATTTGGAAATGCGAAGGAGAGTGTGGTGGACATTGATTGTACTTGA  
TACAAGAGCTTCCGAAGATCGGGGTACAGAAACCATGATCACTGATGGCTCTTTCGATACAAAGATGCCTGCCAACATAAACGACGAGGATATG  
ATGATAAACTCAAAAAGTCTACCGGTGATCGGATAGGGATCACCAGTATGACCTTTGCTTGCATTACAATGACAGTCAGCGGGATCGGATTGA  
GGATGAATTTTGTACCTACGCGCTAGACGCGCCGGTCTTGACCACAGAACA AAAAGAGCAGATGATCAAAGGATTTACTGACAAAATCGATTC  
TACCTATCTCGCAGGTTCTGATCCCAATGATCCAAGATTGTGGTGGTATTGTCCGATATCACGACTATTATCGCTCAAGTTATGGCTGGTGACA  
CAATATCCACTTCAACGAAGGAAATCTACAAATCGAGTGTCTCCTCGAGGACAATCCTTGCCTACAGCTATGGCATTCCTAAATTTGGCGGAAG

AAATATGGCAATATGAACCTTCAAAGGGATGGTTCTGGTTCTTTCAAAGTTATGTGCCGTGGCATGTAATTGCGGTTGCTTTAGCTGAGCTTTG  
TGCGGAACCAACTGGCCCTCTTGCCGATCAAGCTTGGGAGGGCATTGAGTTTCACTACAATAAATGGAGTGAATTCGTTGCAGATACAAAAGAT  
GGGATGATTTGGCGACCAGTCAGGAATTTAATGAAAAGAGCAAGAGCAGCAAGAAGGCCGAGAAAAGAGGTCCTCAGTGAATCTCAAGCATCAACAA  
CTCCAACGGCAATTCGCAACCCTAATACATACAGCCAGCTCTCAATCTAGCTGCTGGATGCTCCCCGATCATGTCCGAGAACAAATAACTACTG  
TCAATCTTCTACAATTGGACAGTTGACCCAATGGGGCAGAATATTTACGGGGGAATGGGCTTCGATCTTCCCATGCCCATGGGTTCTACCCCC  
TCAGACACGAATATGGCATCCCCACTACCTATTCGGACGGCTATACAAATCCGCACTGGAACGAATTCATATTTGGTTTAGGAACAGTTTGTA  
GCGATGGACCCCAAAATCCAGA

>Bcin05g01790(mrr1), partial sequence [organism=Botrytis cinerea, strain D10\_K\_S11\_6]

CAGGCATCTGGCACGGAATGTATTTCCCTACACGTGTTTCGGAACCCAAGACCGAGACAAAGCAATCCAAAGTCTCGTGATTCTGAGCTATTAA  
AAAGAATCTCTCATCTCGAAAGTTTGGTGAGCAGAATTGATGCCCTCAAACTCCTTGGGGAGGATGGTCAGGTAGAAGACGAGGTTCCGGTCAA  
TCCGCCATCATCAGGACCGCGACCTCATCGTTCTTTACAGTCTCCAGACCACCAATACAATGACAATCATCATGAGTTTGGAAATAGTACCAGGT  
CGTATGGCTCATCAATTTGCTGATTTTATTAACGCCAAGAGACCGACTCGATTTACACTCATGATGGATTTTGGACAAGACTAAGTGAAGAAA  
TTGATGGATTGAAACAGCTCATCGAGAGCCCCAGTGACGACGAAGATGAAAATCTGGGTCCACTGCAACTTCGCCAGCATCCAAGTATGACTC  
TCCTTACAGTTTGTCTTTGATTCAGGGTCACTTCCCTCGAATGTCATAATCCATATCCATCCCAGACCATAACAAAGTTTTATTCGATATT  
TATTTCAAAAATGTACATCCGACGGTCGTCATATGCACAAGCCAACAACGTACCTTTTACAAAACCCAAATTTCTGAGTTACTCGATGAGAATA  
CTGGCCGGCACAAAATCAAAGTCTCGAGGCTAGCGTGTGCTATGTACCTGGCTGCTGTGACGAGCATGACAAAATGAAGAGTGCCTTGAGCT  
TTTAAATGAAGAAAAGAAATATTTAGTAACACGGTACAAAACCTGCGACTGAGATTGCTCTTCAAGAATCAGATTTTCTTAATAGTGTGAAAT  
GTTACTTTACAAGCTTTAATAACGTATATCGCAGCTATGCGCACTCATGATCGAAGTCGATCTATATGGGCATTTATCGGTCTTGCAGTCCGCC  
TTGCCCGTGGCATCGGGCTCCACAGAGATGGCAGCCAGCAACCTTTCGATTTGGAAATGCGAAGGAGAGTGTGGTGGACATTGATTGTACTTGA  
TACAAGAGCTTCCGAAGATCGGGGTACAGAAACCATGATCACTGATGGCTCTTTCGATACAAAGATGCCTGCCAACATAAACGACGAGGATATG  
ATGATAAACTCAAAAAGTCTACCGGTCGATCGGATAGGGATCACCAGTATGACCTTGTCTTGCATTACAATGACAGTCAGCGGGATCGGATTGA  
GGATGAATTTTGTACTACGCGCCTAGACGCGCCGGTCTTGACCACAGAACAAGAGCAGATGATCAAAGGATTTACTGACAAAATCGATTC  
TACCTATCTCGCAGTTCTGATCCCAATGATCCAAGATTGTGGTGGTATTGTGGATATCACGACTATTATCGCTCAAGTTATGGCTGGTGACA  
CAATATCCACTTCAACGAAGGAAATCTACAAATCGAGTGTCTCCTCGAGGACAATCCTTGCCTACAGCTATGGCATTCCTAAATTTGGCGGAAG  
AAATATGGCAATATGAACCTTCAAAGGGATGGTTCTGGTTCTTTCAAAGTTATGTGCCGTGGCATGTAATTGCGGTTGCTTTAGCTGAGCTTTG  
TGCGGAACCAACTGGCCCTCTTGCCGATCAAGCTTGGGAGGGCATTGAGTTTCACTACAATAAATGGAGTGAATTCGTTGCAGATACAAAAGAT  
GGGATGATTTGGCGACCAGTCAGGAATTTAATGAAAAGAGCAAGAGCAGCAAGAAGGCCGAGAAAAGAGGTCCTCAGTGAATCTCAAGCATCAACAA  
CTCCAACGGCAATTCGCAACCCTAATACATACAGCCAGCTCTCAATCTAGCTGCTGGATGCTCCCCGATCATGTCCGAGAACAAATAACTACTG  
TCAATCTTCTACAATTGGACAGTTGACCCAATGGGGCAGAATATTTACGGGGGAATGGGCTTCGATCTTCCCATGCCCATGGGTTCTACCCCC  
TCAGACACGAATATGGCATCCCCACTACCTATTCGGACGGCTATACAAATCCGCACTGGAACGAATTCATATTTGGTTTAGGAACAGTTTGTA  
GCGATGGACCCCAAAATCCAGA

>Bcin05g01790(mrr1), partial sequence [organism=Botrytis cinerea, strain D11\_T\_E18]

CAGGCATCTGGCACGGAATGCATTTTCCCTACACGTGTTTCGGAACCCAAGACCGAGACAAAGCAATCCAAAGTCTCGTGATTCTGAGCTATTAA  
AAAGAATCTCTCACCTCGAAAGTTTGGTGAGCAGAATTGATGCCCTCAAACTCCTTGGGGAGGATGGTCAGGTAGAAGACGAGGTTCCGGTCAA  
TCCACCATCGTCAGGACCGCGACCTCATCGTTCTTTACAGTCTCCAGACCACCAATACAATGACAATCATCATGAGTTCCGGAATAGTACCAGGT  
CGTATGGCTCATCAATTTGCTGATTTTATCAAACGCCAAGAGACCGACTCGATTTACACCATGATGGATTTTGGACAAGACTAAGTGAAGAAA  
TTGATGGATTGAAACAGCTCATCGAGAGCCCCAGTGACGATGAAGATGAAAATCTGGGTCCACTGCAACTTCGCCAGCATCCAAGTATGACTC  
CCCTTACAGTTTGTCTTTGATTCAGGGTCACTTCCCTCAATGTCACAATTCATATCCATCCCAGACCATACGAAAAGTTTTATTCGATATT  
TATTTCAAAAATGTACATCCGATGGTCGTCATATGCACAAGCCAACAACGTACCTTTTACAAAACCCAAATTTCTGAGTTACTCGATGAGAATA  
CTGGCCGGCACAAAATCAAAGTCTCGAGGCTAGCGCATTTTCTATGTACCTGGCTGCTGTGACGAGCATGACAAAATGAAGAGTGCCTTGAGCT  
TTTAAATGAAGAAAAGACAGATTTTAGTAACAAGGTACAAAACCTGCGACTGAGATTGCTCTTCAAGAATCAGATTTTCTTAATAGTGTAGAAAT  
GTTACTTTACAAGCTTTGATAACGTATATCGCAGCTATGCGCGCTCATGATCGAAGTCGATCTACATGGACATTTATCGGTCTTGCAGTCCGCC  
TTGCCCGTGGCATCGGGCTCCACAGGGATGGCACCAGGGCTCCACAGAGATGGCAGCAAGCAACCTTTCGATTTGGAAATGCGAAGGAGACTATG  
GTGGACATTGATTGTACTTGTATACAAGAGCTTCCGAAGATCGGGGTACGGAAACTATGATCACTGATGGCTCTTTCGATACAAAGATGCCTGCC  
AATATAAATGATGAGGATATATCGATAAACTCAAAAACCTTACCGGTCGATCGGCTAGGATTAACCAGTATGACCTTTGCTTGCATTACAATGA  
CAGTCAGCGGGATCGGATTGAGGATGAATTTTGTACCTACGCGCCTAGACGCGCCGGTCTTGACCACAGAACAAGAGCAGATGATCAAAGG  
ATTTACTGACAAAATCGATTTCTACCTATGTCACATGTTCTGATCCCAATGATCCAAGATTGTGGTGGTTTTTGTCCGGTATCACGACTATTATCG  
CTCAAGTTATGGTTGGCGACACAATATCCACTTACGCGAAGGAAATCTACAAATCGAGTGTCTCCTCGAGGACAATCCTTGCCTACAGCTATGG  
CATTCTTAAATTTGGCGGAAGAAAATATGGCAATATGAACCTTCAAAGGGATGGTTCTGGTTCTTTCAAAGTTATGTGCCGTGGCATGCAATTGC  
GGTTGCTTTAGCTGAGCTTTGTGCGGAACCAACTGGCCCTCTTGCCGATCAAGCTTGGGGGAGCATCGAGTTTCATTACAATAAATGGAGTGAA  
TTCGTTGCAGATACAAAAGATGGGATGATTTGGCGGCCAGTCAAGAATTTAATGAAAAGAGCAAAAGCAGCAAGAAGGCCGAGAAAAGAGGTCTCA  
GTGAATCTCAAGCATCAACAACCTCAACGGCAATTTCAACCCTAATACATACAGCCAGCTCTCGATCTAGGTGCTGAATTTCTACCAATCAT  
GTCGGAGAATAAATACTACCGTCAACCTTCTACAATTTGGCAGGTTGACCCAATGGGGCAGAATATTTACGGGGGATGAGCTTCGATCTTCCC  
ATGCCATGTGTTCTACCCCTCAGACACGAATATGGCATCCCCACTACCTATTCGGACGGTTATACAAATCCGCACTGGAACGAATTCATAT  
TTGGTTTAGGAACAGTTGGTAGCGATGGACCCAGAAATCCAGA

>Bcin05g01790(mrr1), partial sequence [organism=Botrytis pseudocinerea, strain BpsVD110]

CAGGCATCTGGCACGGAATGTATTTCCCTACACGTGTTTCGGAATCCAAGACCGAGACAAAGCAATCCAAAGTCTCGTGATTCTGAGCTATTGA

AAAGAATCTCTCATCTCGAAAGTTTGGTGAGCAGAATTGATGCCCTAAAACCTCCTTGGGGAGGATGGTCAGGTAGAAGACGAGGTTCCGGTCAAA  
CCCACCATCATCAGGACCGCGACCTCATCGTTCTTTACGTCTCCAGACCGCCAATACAATGACAACCACCATGAGTTTGGAAATAGTACCAGGT  
CGTATGGCTCATCAATTTGCTGATTTTATTAAACGCCAAGAGACCGACTCGATTTACACTCATGATGGATTTTGGACAAGATTAAGTGAAGAAA  
TTGATGGATTGAAAACAGCTCATCGAGAGCCCCAGTGACGATGAAGATGAAAATTTCTGGGTCAACTGCAACCTCGCCAGCATCCAAGTATGACTC  
CCCTTACAGTTTGTCTTTGATTCCAGGGTCACTTCTCGAATGTCATAATTCATATCCATCCCAGACCATAACAAAATTTTATTTCGATATT  
TATTTCAAAAATGTACATCCGATGGTCTGACTATGCACAAGCCAACAACGTACCTTTTCTCAAACCCAAATTTCTGAGTTAATGGATGAGAATA  
CTGGCCGGCACAATAATCAAAAAGTCTCGAGGCTAGCGCATTTTCTATGTACCTGGCTGCTGTGACGAGCATGACAAAATGAAGAGTGCCTTGAGCT  
TTTAAATGAAGAAAACAGATTTTAGTAACAAGGTACAAAACCTGCGACTGAGATTGCTCTTCAAGAATCAGATTTTCTTAAATAGTGTAGAAAT  
GTTACTCTACAAGCTTTAATCACGTATATCGTAAGTGTCTTCTCTACACATCTTAGATGATAGTTTACGATGATGATGATGTTTATGTACTT  
TCACAGGCAGCTATGCGCACTCATGATCGAAGTGCATCTACATGGGCATTTATCGGTCTTGCAGTCCGCCCTTGCCCGTGGCATCGGGCTCCACA  
GGGATGGCAGCAGCAATCTTTGATTTGGAAATGCGAAGGAGAATATGGTGACATTTGATTTGATAACAAGAGCCTCCGAAGATCGGGG  
TACAGAAAATATGATCACTGATGGCTCTTTGATACAAAAGATGCCTGCCAATATAAATGACGAGGATATCTTGATAGACTCAAAAACCTTACCA  
GTCGATCGGATAGGATTCACCAGTATGACCTTTGCTTGCATTACAATGACAGTCAGCGGGATCGGATTGAGGATGAATTTTGTACCTACGCGCC  
TAGACGCGCCGGTCTTGACCACAGAACAAGAGCAGATGATCAAAGGATTTACTGACAAAATCGATTTACCTATGTCACAGGTTCTGATCC  
CAATGATCCAAAATTTGTTGGTGGTTTTGTGCGGATATCACGACTATTATCGCTCAAGTTATGGTTGGCGACACAATACCCACTTCAGCGAAGGAAA  
TCTACAAAATCGAGTCTTCTCGAGGACAATCCTTGCGTACAGCTATGGCATACTTAAATTTGGCGGAAGAAAATATGGCAATATGAACCTTCAA  
AGGGATGGTCTGGTCTTTCAAAGTTATGTGCCGTGGCATGCAATTCGGTTGCTTTAGCTGAGCTTTGTGCGGAACCAACTGGCCCTCTTGC  
CGATCACGCTTGGGGGAGCATTGAGTCTCATTACAATAAATGGAGTGAATTCGTTGCGAGATACAAAAGATGGGATGATTTGGCGGCCAGTCAAG  
AATTTAATGAAAAGAGCAAGAGCAGCAAGAAGGCCGAGAAAAGAGGTTCTCAGTGAATCTCAAGCATCAACAACCTCCAACGGCAATTTCTCAACCTA  
ATATATACAGCCAGCTCTCGATCTAGGTGCTGAATTTCTACCAATCATGTCGGAGAATAAATACTACCGTCAACCTTCTACAATTTGGGCAGGT  
TGACCAATGGGGCAGAATATTTACGGGGGGATGAGCTTCGATCTTCCATGCCATGTGTTCTACCCCTCAGACACGAATATGACATCCCCA  
CTACCTATTCCGGACGGCTATACAAAATCCGCACTGGAATGAATTCATATTTGGCTTAGGAACAGTTGGTAGCGATGGACCCAAAACCCAGA  
>Bcin05g01790(mrr1), partial sequence [organism=Botrytis pseudocinerea, strain BpsD11\_KL\_cal2]  
CAGGCATCTGGCAGGAATGTATTTCCCTACACGTGTTTCGGAACCCAAGACCGAGACAAAGCAATCCAAAGTCTCGTGATTTCTGAGCTATTGA  
AAAGAATCTCTCACCTCGAAAGTTTGGTGAGCAGAATTGATGCCCTAAAACCTCCTTGGGGAGGAGGGTTCAGGTAGAAGACGAGGTTCCGGTCAAA  
CCCACCATCATCAGGATCGCGACCTCATCGTTCTTTACGTCTCCAGACCGCCAATACAATGACAATCACCATGAGTTTGGAAATAGTACCAGGT  
CGTATGGCTCATCAATTTGCTTATTTTATTAAACGCCAAGAGGCCGACTCGATTTACACTCATGATGGATTTTGGACAAGATTAAGTGAAGAAA  
TTGATGGATTGAAAACAGCTCATCGAGAGCCCCAGTGACGATGAAGATGAAAATTTCTGGGTCAACTGCAACCTCGCCAGCATCCAAGTATGACTC  
CCCTTACAGTTTGTCTTTGATTCCAGGGTCACTTCTCGAATGTCATAATTCATATCCATCCCAGACCATAACAAAATTTTATTTCGATATT  
TATTTCAAAAATGTACATCCGATGGTCTGACTATGCACAAGCCAACAACGTACCTTTTCTCAAACCCAAATTTCTGAGTTAATGGATGAGAATA  
CTGGCCGGCACAATAATCAAAAAGTCTCGAGGCTAGCGCATTTTCTATGTACCTGGCTGCTGTGACGAGCATGACAAAATGAAGAGTGCCTTGAGCT  
TTTAAATGAAGAAAACAGATTTTAGTAACAAGGTACAAAACCTGCGACTGAGATTGCTCTTCAAGAATCAGATTTTCTTAAATAGTGTAGAAAT  
GTTACTCTACAAGCTTTAATCACGTATATCGTAAGTGTCTTCTCTACACATCTTAGATGATAGTTTACGATGATGATGATGTTTATGTACTT  
TCACAGGCAGCTATGCGCACTCATGATCGAAGTGCATCTACATGGGCATTTATCGGTCTTGCAGTCCGCCCTTGCCCGTGGCATCGGGCTCCACA  
GGGATGGCAGCGGGCTCCACAGGGATGGCAGCAGGCTCAACAGAGATGGCAGCAGCAATCTTTGATTTGGAAATGCGAAGGAGAATATGGTG  
GTCATTGATTTGACTTTGATAACAAGAGCCTCCGAAGATCGGGGTACAGAAAATATGATCACTGATGGCTCTTTGATACAAAAGATGCCGCAAT  
ATAAATGACGAGGATATCTTGATAGACTCAAAAACCTTACCAGTGCATCGGATAGGATTCACCAGTATGACCTTTGCTTGCATTACAATGACAG  
TCAGCGGGATCGGATTGAGGATGAATTTTGTACCTACGCGCTTAGACGCGCCGGTCTTGACCACAGAACAAGAGCAGATGATCAAAGGATTT  
TACTGACAAAATCGATTTACCTATGTCACAGGTTCTGATCCCAATGATCCAAAATTTGTTGGTGGTTTTGTGCGGATATCACGACTATTTATCGCTC  
AAGTTATGGTTGGCGACACAATACCCACTTCAGCGAAGGAAAATCTACAAAATCGAGTGCCTTCTCGAGGACAATCCTTGCCTACAGCTATGGCAT  
TCTTAAATTTGGCGGAAGAAAATATGGCAATATGAACCTTCAAAGGGATGGTTCTGGTTCTTTCAAAGTTATGTGCCGTGGCATGCAATTTGCCGT  
TGCTTTAGCTGAGCTTTGTGCGGAACCAACTGGCCCTCTTGCCGATCACGCTTGGGGGAGCATTGAGTTTCAATACAATAAATGGAGTGAATTC  
GTTGAGATACGAAAAGATGGGATGATTTGGCGGCCAGTCAAGAATTTAATGAAAAGAGCAAGAGCAGCAAGAAGGCCGAGAAAGAGGTTCTCAGTG  
AATCTCAAGCATCAACAACCTCCAACGGCAATTTCTCAACCTAATATATACAGCCAGCGCTCGATCTAGGTGCTGAATTTCTCACCGATCATGTC  
GGAGAATAAATAACTACCGTCAACCTTCTACAATTTGGGCAGGTTGACCCAATGGGGCAGAATATTTACGGGGGGATGAGCTTCGATCTTCCCATG  
CCCATGTGTTCTACCCCTCAGACACGAATATGGCATCCCCAATACCTATTCGGACGGCTATACAAAACCCGCACTGGAATGAATTCATATTTG  
GTTTAGGAACAGTTGGTAGCGATGGACCCAAAACCCAGA

>Bcin05g01790(mrr1), partial sequence [organism=Botrytis pseudocinerea, strain BpsD12\_E\_cal10]  
CAGGCATCTGGCAGGAATGTATTTCCCTACACGTGTTTCGGAATCCAAGACCGAGACAAAGCAATCCAAAGTCTCGTGATTTCTGAGCTATTGA  
AAAGAATCTCTCATCTCGAAAGTTTGGTGAGCAGAATTGATGCCCTAAAACCTCCTTGGGGAGGATGGTCAGGTAGAAGACGAGGTTCCGGTCAAA  
CCCACCATCATCAGGACCGCGACCTCATCGTTCTTTACGTCTCCAGACCGCCAATACAATGACAACCACCATGAGTTTGGAAATAGTACCAGGT  
CGTATGGCTCATCAATTTGCTGATTTTATTAAACGCCAAGAGACCGACTCGATTTACACTCATGATGGATTTTGGACAAGATTAAGTGAAGAAA  
TTGATGGATTGAAAACAGCTCATCGAGAGCCCCAGTGACGATGAAGATGAAAATTTCTGGGTCAACTGCAACCTCGCCAGCATCCAAGTATGACTC  
CCCTTACAGTTTGTCTTTGATTCCAGGGTCACTTCTCGAATGTCATAATTCATATCCATCCCAGACCATAACAAAATTTTATTTCGATATT  
TATTTCAAAAATGTACATCCGATGGTCTGACTATGCACAAGCCAACAACGTACCTTTTCTCAAACCCAAATTTCTGAGTTAATGGATGAGAATA  
CTGGCCGGCACAATAATCAAAAAGTCTCGAGGCTAGCGCATTTTCTATGTACCTGGCTGCTGTGACGAGCATGACAAAATGAAGAGTGCCTTGAGCT  
TTTAAATGAAGAAAACAGATTTTAGTAACAAGGTACAAAACCTGCGACTGAGATTGCTCTTCAAGAATCAGATTTTCTTAAATAGTGTAGAAAT  
GTTACTCTACAAGCTTTAATCACGTATATCGTAAGTGTCTTCTCTACACATCTTAGATGATAGTTTACGATGATGATGATGTTTATGTACTT  
TCACAGGCAGCTATGCGCACTCATGATCGAAGTGCATCTACATGGGCATTTATCGGTCTTGCAGTCCGCCCTTGCCCGTGGCATCGGGCTCCACA  
GGGATGGCAGCGGGCTCCACAGGGATGGCAGCAGGCTCAACAGAGATGGCAGCAGCAATCTTTGATTTGGAAATGCGAAGGAGAATATGGTG  
GTCATTGATTTGACTTTGATAACAAGAGCCTCCGAAGATCGGGGTACAGAAAATATGATCACTGATGGCTCTTTGATACAAAAGATGCCGCAAT  
ATAAATGACGAGGATATCTTGATAGACTCAAAAACCTTACCAGTGCATCGGATAGGATTCACCAGTATGACCTTTGCTTGCATTACAATGACAG  
TCAGCGGGATCGGATTGAGGATGAATTTTGTACCTACGCGCTTAGACGCGCCGGTCTTGACCACAGAACAAGAGCAGATGATCAAAGGATTT  
TACTGACAAAATCGATTTACCTATGTCACAGGTTCTGATCCCAATGATCCAAAATTTGTTGGTGGTTTTGTGCGGATATCACGACTATTTATCGCTC  
AAGTTATGGTTGGCGACACAATACCCACTTCAGCGAAGGAAAATCTACAAAATCGAGTGCCTTCTCGAGGACAATCCTTGCCTACAGCTATGGCAT  
TCTTAAATTTGGCGGAAGAAAATATGGCAATATGAACCTTCAAAGGGATGGTTCTGGTTCTTTCAAAGTTATGTGCCGTGGCATGCAATTTGCCGT  
TGCTTTAGCTGAGCTTTGTGCGGAACCAACTGGCCCTCTTGCCGATCACGCTTGGGGGAGCATTGAGTTTCAATACAATAAATGGAGTGAATTC  
GTTGAGATACGAAAAGATGGGATGATTTGGCGGCCAGTCAAGAATTTAATGAAAAGAGCAAGAGCAGCAAGAAGGCCGAGAAAGAGGTTCTCAGTG  
AATCTCAAGCATCAACAACCTCCAACGGCAATTTCTCAACCTAATATATACAGCCAGCGCTCGATCTAGGTGCTGAATTTCTCACCGATCATGTC  
GGAGAATAAATAACTACCGTCAACCTTCTACAATTTGGGCAGGTTGACCCAATGGGGCAGAATATTTACGGGGGGATGAGCTTCGATCTTCCCATG  
CCCATGTGTTCTACCCCTCAGACACGAATATGGCATCCCCAATACCTATTCGGACGGCTATACAAAACCCGCACTGGAATGAATTCATATTTG  
GTTTAGGAACAGTTGGTAGCGATGGACCCAAAACCCAGA

GTTACTCTACAAGCTTTAATCACGTATATCGTAAGTGTTCCTCTCTACACATCTTAGATGATAGTTTTACGATGATGATGATGTTTTATGTACTT  
TCACAGGCAGCTATGCGCACTCATGATCGAAGTCGATCTACATGGGCATTTATCGGTCTTGCAGTCCGCCCTTGCCCGTGGCATCGGGCTCCACA  
GGGATGGCAGCACGCAATCTTTGATTTGGAAATGCGAAGGAGAATATGGTGGACATTTGATTGTACTTGATAACAAGAGCCTCCGAAGATCGGG  
TACAGAAACTATGATCACTGATGGCTCTTTGATACAAAAGATGCCTGCCAATATAAATGACGAGGATATCTTGATAGACTCAAAAACCTTACCA  
GTCGATCGGATAGGATTCACCAGTATGACCTTTGCTTGCATTACAATGACAGTCAGCGGGATCGGATTGAGGATGAATTTTGTACCTACGCGCC  
TAGACGCGCCGGTCTTGACCACAGAACAAAAAGAGCAGATGATCAAAGGATTTACTGACAAAATCGATTCTACCTATGTCACAGGTTCTGATCC  
CAATGATCCAAAATTTGTTGGTGGTTTTGTGCGGATATCACGACTATTATCGCTCAAGTTATGGTTGGCGACACAATACCCACTTCAGCGAAGGAAA  
TCTACAAAATCGAGTGTCTTCTCGAGGACAATCCTTGCCTACAGCTATGGCATACTTAAATTTGGCGGAAGAAAATATGGCAATATGAACCTTCAA  
AGGGATGGTTCTGGTTCTTTCAAAGTTATGTGCCGTGGCATGCAATTGCGGTTGCTTTAGCTGAGCTTTGTGCGGAACCAACTGGCCCTCTTGC  
CGATCACGCTTGGGGGAGCATTGAGTCTCATTACAATAAATGGAGTGAATTCGTTGCAGATACAAAAGATGGGATGATTTGGCGGCCAGTCAAG  
AATTTAATGAAAAAGAGCAAGAGCAGCAAGAAGGCGAGAAAAGAGGTCTCAGTGAATCTCAAGCATCAACAACCTCCAACGGCAATTTCTCAACCTA  
ATATATACAGCCCAGCTCTCGATCTAGGTGCTGAATTTCTACCAATCATGTCCGAGAATAATAACTACCGTCAACCTTCTACAATTTGGGCAGGT  
TGACCAATGGGGCAGAATATTTACGGGGGGATGAGCTTCGATCTTCCATGCCATGTGTTCTACCCCTCAGACACGAATATGACATCCCA  
CTACCTATTTCCGGACGGCTATACAAAATCCGCACTGGAATGAATTCATATTTGGCTTAGGAACAGTTGGTAGCGATGGACCCAAAACCCAGA  
>Bcin05g01790(mrr1), partial sequence [organism=Botrytis cinerea, strain D13\_E\_IF04]  
CAGGCATCTGGCACGGAATGCATTTTCCCTACACGTGTTCGGAACCCAAGACCGAGACAAAGCAATCCAAAGTCTCGTGATTCTGAGCTATTA  
AAAGAATCTCTCACCTCGAAAGTTTGGTGAGCAGAATTGATGCCTCAAAAACCTTGGGGAGGATGGTCAGGTAGAAGACGAGGTTCCGGTCAA  
TCCACCATCATCAGGACCGCGACCTCATCGTTCTTTACGCTCCAGACCACCAATACAATGATAATCATCATGAGTTCGGAATAGTACCAGGT  
CGTATGGCTCATCAATTTGCTGATTTTATTAACGCCAAGAGACTGACTCGATTTATACCCATGATGGATTTTGGACAAGACTAAGTGAAGAAA  
TTGATGGATTGAAACAGCTCATCGAGAGCCCAGTGACGATGAAGATGAAAATTTTGGGTCCACTGCAACTTCGCCAGCATCCAAGTATGACTC  
CCCTTACAGTTTGTCTTTGATTCAGGGTCACTTCTCGAATGTCACAATTCATATCCATCCCAGACCATACGAAAGTTTTATTCGATATT  
TATTTCAAAAATGTACATCCGATGGTTCGTCACTATGCACAAGTCAACAACGTACCTTTTACAAAACCCAAATTTCTGAGTTACTCGATGAGAATA  
CTGGCCGGCACAAAATTCAAAAGTCTCGAGGCTAGCGCATTTTCTATGTACCTGGCTGCTGTGACGAGCATGACAAATGAAGAGTGCCTTGAGCT  
TTTAAATGAAGAAAGACAGATTTTAGTAACAAGGTACAAAACCTGCGACTGAGATTGCTCTTCAAGAATCGGATTTTCTTAATAGTGTAGAAAT  
GTTACTTTACAAGCTTTAATAACGTATATCGTAAGTATTTCTCTCTCAGCATCTTGGATGATGGTTTTATGATGATGATGATGTTTTATGTACTT  
TCACAGGCAGCTATGCGCGCTCATGATCGAAGTCGATCTACATGGACATTTATCGGTCTTGCAGTCCGCCCTTGCCCGTGGCATCGGGCTCCACA  
GGGATGGCACC GGCTCCACAGAGATGGCAGCAAGGAACCTTTCGACTTGAAAATGCGAAGGAGAATATGGTGGACATTTGATTGTACTTGATAC  
AAGAGCTTCCGAAGATCGGGTACGAAACTATGATCACGGATGGCTCTTTCGATACAAAAGATGCCTGCCAATATAAATGACGAGGATATATCG  
ATAAACTCAAAAACCTTACCGGTTCGATCGGTTAGGATTCACCAGTATGACCTTTGCTTGCATTACAATGACAGTCAGCGGGATCGGATTGAGGA  
TGAATTTTGTACCTACGCGCCTAGACGCGCCGGTCTTGACCACAGAACAAAAAGAGCAGATGATCAAAGGATTTACTGACAAAGTCGATTCTAC  
CTATGTCACATGTTCTGATCCCAATGATCCAAGATTGTGGTGGTTTTCTCGGTATCACGACTATTATCGCTCAAGTTATGGTTGGCGACACAA  
TATCCACTTCAGCGAAGGAAATCTACAAATCGAGTGCTTCTCGGGGACAATCCTTGCCTACAGCTATGGCATTTCTTAAATTTGGCGGAAGAAA  
TATGGCAATATGAACCTTCAAAGGGATGGTACTGGTTCTTTCAAAGTTATGTGCCGTGGCATGCAATTGCGGTTGCTTTAGCTGAGCTTTGCGC  
GGAACCAACTGGCCCTCTTGCCGATCAAGCTTGGGGGAGCATCGAGTTTCAATACAATAAATGGAGTGAATTCGTTGCAGATACAAAAGATGGG  
ATGATTTGGCGGCCAGTCAAGAATTTAATGAAAAGAGCAAGAGCAGCAAGAAGGCGAGAAAGAGGTCTCAGTGAATCTCAAGCATCAACAACCTC  
CAACGGCAATTTCTCAACCTAATACATACAGCCCAGCTCTCGATCTAGGTGCTGAATTTCTACCAATCATGTCCGAGAATAATAACTATCGTCA  
ACCTTCTACAATTTGGCGAGGTTGACCCAATGGGGCAGAATATTTACGGGGGGATGAACTTCGATCTTCCATGCCATGTGTTCTACCCCTCA  
GACACGAATATGGCATCCCCTACTACCTATTTCCGACGGCTATACAAAATCCGCACTGGAACGAATTCATATTTGGTTTAGGAACAGTTGGTAGCG  
ATGGACCCAAAATCCAGA

>Bcin05g01790(mrr1), partial sequence [organism=Botrytis cinerea, strain D13\_E\_IL4]  
CAGGCATCTGGCACGGAATGCATTTTCCCTACACGTGTTCGGAACCCAAGACCGAGACAAAGCAATCCAAAGTCTCGTGATTCTGAGCTATTA  
AAAGAATCTCTCACCTCGAAAGTTTGGTGAGCAGAATTGATGCCTCAAAAACCTTGGGGAGGATGGTCAGGTAGAAGACGAGGTTCCGGTCAA  
TCCACCATCATCAGGACCGCGACCTCATCGTTCTTTACGCTCCAGACCACCAATACAATGATAATCATCATGAGTTCGGAATAGTACCAGGT  
CGTATGGCTCATCAATTTGCTGATTTTATTAACGCCAAGAGACTGACTCGATTTATACCCATGATGGATTTTGGACAAGACTAAGTGAAGAAA  
TTGATGGATTGAAACAGCTCATCGAGAGCCCAGTGACGATGAAGATGAAAATTTTGGGTCCACTGCAACTTCGCCAGCATCCAAGTATGACTC  
CCCTTACAGTTTGTCTTTGATTCAGGGTCACTTCTCGAATGTCACAATTCATATCCATCCCAGACCATACGAAAGTTTTATTCGATATT  
TATTTCAAAAATGTACATCCGATGGTTCGTCACTATGCACAAGTCAACAACGTACCTTTTACAAAACCCAAATTTCTGAGTTACTCGATGAGAATA  
CTGGCCGGCACAAAATTCAAAAGTCTCGAGGCTAGCGCATTTTCTATGTACCTGGCTGCTGTGACGAGCATGACAAATGAAGAGTGCCTTGAGCT  
TTTAAATGAAGAAAGACAGATTTTAGTAACAAGGTACAAAACCTGCGACTGAGATTGCTCTTCAAGAATCGGATTTTCTTAAATAGTGTAGAAAT  
GTTACTTTACAAGCTTTAATAACGTATATCGTAAGTATTTCTCTCTCAGCATCTTGGATGATGGTTTTATGATGATGATGATGTTTTATGTACTT  
TCACAGGCAGCTATGCGCGCTCATGATCGAAGTCGATCTACATGGACATTTATCGGTCTTGCAGTCCGCCCTTGCCCGTGGCATCGGGCTCCACA  
GGGATGGCACC GGCTCCACAGAGATGGCAGCAAGGAACCTTTCGACTTGAAAATGCGAAGGAGAATATGGTGGACATTTGATTGTACTTGATAC  
AAGAGCTTCCGAAGATCGGGTACGAAACTATGATCACGGATGGCTCTTTCGATACAAAAGATGCCTGCCAATATAAATGACGAGGATATATCG  
ATAAACTCAAAAACCTTACCGGTTCGATCGGTTAGGATTCACCAGTATGACCTTTGCTTGCATTACAATGACAGTCAGCGGGATCGGATTGAGGA  
TGAATTTTGTACCTACGCGCCTAGACGCGCCGGTCTTGACCACAGAACAAAAAGAGCAGATGATCAAAGGATTTACTGACAAAGTCGATTCTAC  
CTATGTCACATGTTCTGATCCCAATGATCCAAGATTGTGGTGGTTTTCTCGGTATCACGACTATTATCGCTCAAGTTATGGTTGGCGACACAA  
TATCCACTTCAGCGAAGGAAATCTACAAATCGAGTGCTTCTCGGGGACAATCCTTGCCTACAGCTATGGCATTTCTTAAATTTGGCGGAAGAAA



```
TATGGCAATATGAACCTTCAAAGGGATGGTACTGGTTCCTTCAAAGTTATGTGCCGTGGCATGCAATTGCGGTTGCTTTAGCTGAGCTTTGCGC  
GGAACCAACTGGCCCTCTTGCCGATCAAGCTTGGGGGAGCATCGAGTTTCATTACAATAAATGGAGTGAATTCGTTGCAGATACAAAAGATGGG  
ATGATTTGGCGGCCAGTCAAGAATTTAATGAAAAGAGCAAGAGCAGCAAGAAGGCGAGAAAGAGGTCTCAGTGAATCTCAAGCATCAACAACCTC  
CAACGGCAATTTCTCAACCCTAATACATACAGCCCAGCTCTCGATCTAGGTGCTGAATTTCTCACCAATCATGTCCGAGAATAATAACTATCGTCA  
ACCTTCTACAATTGGGCAGGTTGACCCAATGGGGCAGAATATTTACGGGGGGATGAACTTCGATCTTCCCATGCCCATGTGTTCTACCCCTCA  
GACACGAATATGGCATCCCCTACTACCTATTCGGGACGGCTATACAAATCCGCACTGGAACGAATTCATATTTGGTTTAGGAACAGTTGGTAGCG  
ATGGACCCCAAAATCCAGA
```

>Bcin05g01790(mrr1), partial sequence [organism=Botrytis cinerea, strain D13\_E\_IL7]

```
CAGGCATCTGGCACGGAATGCATTTTCCCTACACGTGTTTCGGAACCCAAGACCGAGACAAAGCAATCCAAAGTCTCGTGATTCTGAGCTATTAA  
AAAGAATCTCTCACCTCGAAAGTTTGGTGAGCAGAATTGATGCCCTAAAACCTCTTGGGGAGGATGGTCAGGTAGAAGACGAGGTTCCGGTCAA  
TCCACCATCATCAGGACCGCGACCTCATCGTTCTTTACAGTCTCCAGACCACCAATACAATGATAATCATCATGAGTTCCGGAATAGTACCAGGT  
CGTATGGCTCATCAATTTGCTGATTTTATTAAACGCCAAGAGACTGACTCGATTTATACCCATGATGGATTTTGGACAAGACTAAGTGAAGAAA  
TTGATGGATTGAAACAGCTCATCGAGAGCCCAGTGACGATGAAGATGAAAATCTGGGTCCACTGCAACTTCGCCAGCATCCAAGTATGACTC  
CCCTTACAGTTTGTCTTTGATTCAGGGTCACTTCCCTCGAATGTCACAAATCCATATCCATCCCACGACCATACGAAAGTTTTATTCGATATT  
TATTTCAAATAATGTACATCCGATGGTTCGTCACAAAGTCAACAACGTACCTTTTACAAAACCCAAATTTCTGAGTTACTCGATGAGAATA  
CTGGCCGGCACAAATTCAAAAGTCTCGAGGCTAGCGCATTTTCTATGTACCTGGCTGCTGTGACGAGCATGACAAATGAAGAGTGCCTTGAGCT  
TTTAAATGAAGAAAGACAGATTTTAGTAACAAGGTACAAAACCTGCGACTGAGATTGCTCTTCAAGAATCGGATTTTCTTAATAGTGTAGAAAT  
GTTACTTTACAAGCTTTAATAACGTATATCGTAAGTATTTCTCTCTCAGCATCTTGGATGATGGTTTTATGATGATGATGATGTTTTATGTACTT  
TCACAGGCAGCTATGCGCGCTCATGATCGAAGTCGATCTACATGGACATTTATCGGTCTTGCAGTCCGCCCTTGCCCGTGGCATCGGGCTCCACA  
GGGATGGCACCGGGCTCCACAGAGATGGCAGCAAGGAACCTTTTCGACTTGGAAATGCGAAGGAGAATATGGTGGACATTGATTGTACTTGATAC  
AAGAGCTTCCGAAGATCGGGGTACGAAACTATGATCACGGATGGCTCTTTCGATACAAAAGATGCCGCAATATAAATGACGAGGATATATCG  
ATAAACTCAAAAACCTCTACCCGTCGATCGGTTAGGATTCACCAGTATGACCTTTGCTTGCATTACAATGACAGTCAGCGGGATCGGATTGAGGA  
TGAATTTTGTACCTACGCGCCTAGACGCGCGATCTTGACCACAGAACAAAAGAGCAGATGATCAAAGGATTTACTGACAAAGTCGATTCTAC  
CTATGTCACATGTTCTGATCCCAATGATCCAAGATTGTGGTGGTTTTCTCGGTATCACGACTATTATCGCTCAAGTTATGGTTGGCGACACAA  
TATCCACTTCAGCGAAGGAAATCTACAAATCGAGTGCTTCCCTCGGGGACAATCCTTGCCTACAGCTATGGCATCTTAAATTTGGCGGAAGAAA  
TATGGCAATATGAACCTTCAAAGGGATGGTTCGGTTCCTTCAAAGTTATGTGCCGTGGCATGCAATTGCGGTTGCTTTAGCTGAGCTTTGCGC  
GGAACCAACTGGCCCTCTTGCCGATCAAGCTTGGGGGAGCATCGAGTTTCATTACAATAAATGGAGTGAATTCGTTGCAGATACAAAAGATGGG  
ATGATTTGGCGGCCAGTCAAGAATTTAATGAAAAGAGCAAGAGCAGCAAGAAGGCGAGAAAGAGGTCTCAGTGAATCTCAAGCATCAACAACCTC  
CAACGGCAATTTCTCAACCCTAATACATACAGCCCAGCTCTCGATCTAGGTGCTGAATTTCTCACCAATCATGTCCGAGAATAATAACTATCGTCA  
ACCTTCTACAATTGGGCAGGTTGACCCAATGGGGCAGAATATTTACGGGGGGATGAACTTCGATCTTCCCATGCCCATGTGTTCTACCCCTCA  
GACACGAATATGGCATCCCCTACTACCTATTCGGGACGGCTATACAAATCCGCACTGGAACGAATTCATATTTGGTTTAGGAACAGTTGGTAGCG  
ATGGACCCCAAAATCCAGA
```

>Bcin05g01790(mrr1), partial sequence [organism=Botrytis cinerea, strain D13\_E\_IL12]

```
CAGGCATCTGGCACGGAATGCATTTTCCCTACACGTGTTTCGGAACCCAAGACCGAGACAAAGCAATCCAAAGTCTCGTGATTCTGAGCTATTAA  
AAAGAATCTCTCACCTCGAAAGTTTGGTGAGCAGAATTGATGCCCTAAAACCTCTTGGGGAGGATGGTCAGGTAGAAGACGAGGTTCCGGTCAA  
TCCACCATCATCAGGACCGCGACCTCATCGTTCTTTACAGTCTCCAGACCACCAATACAATGATAATCATCATGAGTTCCGGAATAGTACCAGGT  
CGTATGGCTCATCAATTTGCTGATTTTATTAAACGCCAAGAGACTGACTCGATTTATACCCATGATGGATTTTGGACAAGACTAAGTGAAGAAA  
TTGATGGATTGAAACAGCTCATCGAGAGCCCAGTGACGATGAAGATGAAAATCTGGGTCCACTGCAACTTCGCCAGCATCCAAGTATGACTC  
CCCTTACAGTTTGTCTTTGATTCAGGGTCACTTCCCTCGAATGTCACAAATCCATATCCATCCCACGACCATACGAAAGTTTTATTCGATATT  
TATTTCAAATAATGTACATCCGATGGTTCGTCACAAAGTCAACAACGTACCTTTTACAAAACCCAAATTTCTGAGTTACTCGATGAGAATA  
CTGGCCGGCACAAATTCAAAAGTCTCGAGGCTAGCGCATTTTCTATGTACCTGGCTGCTGTGACGAGCATGACAAATGAAGAGTGCCTTGAGCT  
TTTAAATGAAGAAAGACAGATTTTAGTAACAAGGTACAAAACCTGCGACTGAGATTGCTCTTCAAGAATCGGATTTTCTTAATAGTGTAGAAAT  
GTTACTTTACAAGCTTTAATAACGTATATCGTAAGTATTTCTCTCTCAGCATCTTGGATGATGGTTTTATGATGATGATGATGTTTTATGTACTT  
TCACAGGCAGCTATGCGCGCTCATGATCGAAGTCGATCTACATGGACATTTATCGGTCTTGCAGTCCGCCCTTGCCCGTGGCATCGGGCTCCACA  
GGGATGGCACCGGGCTCCACAGAGATGGCAGCAAGGAACCTTTTCGACTTGGAAATGCGAAGGAGAATATGGTGGACATTGATTGTACTTGATAC  
AAGAGCTTCCGAAGATCGGGGTACGAAACTATGATCACGGATGGCTCTTTCGATACAAAAGATGCCGCAATATAAATGACGAGGATATATCG  
ATAAACTCAAAAACCTCTACCCGTCGATCGGTTAGGATTCACCAGTATGACCTTTGCTTGCATTACAATGACAGTCAGCGGGATCGGATTGAGGA  
TGAATTTTGTACCTACGCGCCTAGACGCGCGATCTTGACCACAGAACAAAAGAGCAGATGATCAAAGGATTTACTGACAAAGTCGATTCTAC  
CTATGTCACATGTTCTGATCCCAATGATCCAAGATTGTGGTGGTTTTCTCGGTATCACGACTATTATCGCTCAAGTTATGGTTGGCGACACAA  
TATCCACTTCAGCGAAGGAAATCTACAAATCGAGTGCTTCCCTCGGGGACAATCCTTGCCTACAGCTATGGCATCTTAAATTTGGCGGAAGAAA  
TATGGCAATATGAACCTTCAAAGGGATGGTTCGGTTCCTTCAAAGTTATGTGCCGTGGCATGCAATTGCGGTTGCTTTAGCTGAGCTTTGCGC  
GGAACCAACTGGCCCTCTTGCCGATCAAGCTTGGGGGAGCATCGAGTTTCATTACAATAAATGGAGTGAATTCGTTGCAGATACAAAAGATGGG  
ATGATTTGGCGGCCAGTCAAGAATTTAATGAAAAGAGCAAGAGCAGCAAGAAGGCGAGAAAGAGGTCTCAGTGAATCTCAAGCATCAACAACCTC  
CAACGGCAATTTCTCAACCCTAATACATACAGCCCAGCTCTCGATCTAGGTGCTGAATTTCTCACCAATCATGTCCGAGAATAATAACTATCGTCA  
ACCTTCTACAATTGGGCAGGTTGACCCAATGGGGCAGAATATTTACGGGGGGATGAACTTCGATCTTCCCATGCCCATGTGTTCTACCCCTCA  
GACACGAATATGGCATCCCCTACTACCTATTCGGGACGGCTATACAAATCCGCACTGGAACGAATTCATATTTGGTTTAGGAACAGTTGGTAGCG  
ATGGACCCCAAAATCCAGA
```

>Bcin05g01790(mrr1), partial sequence [organism=Botrytis cinerea, strain G09\_S33]  
CAGGCATCTGGCACGGAATGCATTTTCCCTACACGTGTTTCGGAACCCAAGACCGAGACAAAGCAATCCAAAGTCTCGTGATTCTGAGCTATTAA  
AAAGAATCTCTCACCTCGAAAGTTTGGTGAGCAGAATTGATGCCTCAAAACTCCTTGGGGAGGATGGTCAGGTGGAAGACGAGGTTCCGGTCAA  
TCCACCATCATCAGGACCGCGACCTCATCGTTCTTTACAGTCTCCAGACCACCAATACAATGACAATCATCATGAGTTCGGAATAGTACCAGGT  
CGTATGGCTCATCAATTTGCTGATTTTATTAAACGCCAAGAGACCAACTCGATTTACACCCATGATGGATTTTGGACAAGACTAAGTGAAGAAA  
TTGATGGATTGAAACAGCTCATCGAGAGCCCCAGTGACGATGAAGATGAAAAATCTGGGTCCACTGCAACTTCGCCAGCATCCAAGTATGACTC  
CCCTTACAGTTTGTCTTTGATTCCAGGGTCACTTCTCGAATGTCACAATTCATATCCATCCCACGACCATATGAAAGTTTTATTCGATATT  
TATTTCAAAAATGTACATCCGATGGTTCGTCACATGACACAAGTCAACAACGTACCTTTTACAAAACCCAAATTTCTGAGTTACTCGATGAGAATA  
CTGGCCGGCACAAAATTCAAAAGTCTCGAGGCTAGCTCATTTTCTGTGTACCTGGCTGCTGTGACGAGCATGACAAAATGAAGAATGCCTTGAGCT  
TTTAAATGAAGAAAGACAGATTTTAGTAACAAGGTACAAAACCTGCGACTGAAATGCTCTTCAAGAATCAGATTTTCTTAATAGTGTAGAAAT  
GTTACTTTTACAAGCTTTAATAACGTATATCGCAGCTATGCGCGCTCATGATCGAAGTCGATCTATATGGGCATTTATCGGTCTTGCAGTCCGCC  
TTGCCCGTGGCATCGGGCTCCACAGGGATGGCACCGGGCTCCACAGAGATGGCAGCAAGGAACCTTTCGATTTGGAAAATGCGAAGGAGAATATG  
GTGGACATTGATTGTAATTGATAACAAGACTTCCGAAGATCGGGGTACGGAAACTATGATCACGGATGGCTCTTTCGATACAAAGATGCCCTGCC  
AATATAAATGACGAGGATATATCGATAAACTCAAAAACCTACCCGGTTCGATCGGTTAGGATTCACCAGTATGACCTTTGCTTGCATTACAATGA  
CAGTCAGCGGGATCGGATTGAGGATGAATTTTGTACCTACGCGCCTAGACGCGCGGTCTTGACCACAGAACAAAAGAGCAGATGATCAAAGG  
ATTTACTGACAAAAGTCGATTCTACCTATGTCACATGTTCTGATCCCAATGATCCAAGATTGTGGTGGTTTTCTCGGGTATCACGACTATTATCG  
CTCAAGTTATGGTTGGCGACACAATATCCACTTCAGCGAAGGAAATCTACAAATCGAGTGCCTTCTCGGGGACAATCCTTGCCTACAGCTATGG  
CATTCTTAAATTTGGCGGAAGAAAATATGGCAATATGAACCTTCAAAGGGATGGTCTTGGTCTTTCAAAAGTTATGTGCCGTGGCATGCAATTGC  
GGTTGCTTTAGCTGAGCTTTGTGCGGAACCAACTGGCCCTCTTGCCGATCAAGCTTGGGGGAGTATCGAGTTTCATTACAATAAATGGAGTGAA  
TTCGTTGCAGATACAAAAGATGGGATGATTTGGCGGCCAGTCAAGAATTTAATGAAAAGAGCAAAAGCAGCAAGAAGGCGAGAAAGAGGTCTCA  
GTGAATCTCAAGCATCAACAACCTCAACGGCAATTTCTCAATCCTAATACATACAGCCAGCTCTCGATCTAGGTGCTGAATTTCTCACCATCAT  
GTCGGAGAATAAATAACTACCGTCAACCTTCTACAATTTGGGCAGGTTGATCCAATGGGGCAGAATATTTACGGGGGGATGAGCTTCGATCTTCCC  
ATGCCCATGTGTTCTACCCCTCAGACACGAATATGGCATCCCCACTACCTATTCGGACGGTTACACAAATCCGCACTGGAACGAATTCATAT  
TTGGTTTAGGAACAGTTGGTAGCGATGGACCCAGAATCCAGA

>Bcin05g01790(mrr1), partial sequence [organism=Botrytis cinerea, strain D08\_H\_8\_4]  
CAGGCATCTGGCACGGAATGCATTTTCCCTACACGTGTTTCGGAACCCAAGACCGAGACAAAGCAATCCAAAGTCTCGTGATTCTGAGCTATTAA  
AAAGAATCTCTCACCTCGAAAGTTTGGTGAGCAGAATTGATGCCTCAAAACTCCTTGGGGAGGATGGTCAGGTAGAAGACGAGGTTCCGGTCAA  
TCCACCATCATCAGGACCGCGACCTCATCGTTCTTTACAGTCTCCAGACCACCAATACAATGACAATCATCATGAGTTCGGAATAGTACCAGGT  
CGTATGGCTCATCAATTTGCTGATTTTATTAAACGCCAAGAGACCGACTCGATTTACACCCATGATGGATTTTGGACAAGACTAAGTGAAGAAA  
TTGATGGATTGAAACAGCTCATCGAGAGCCCCAGTGACGATGAAGATGAAAAATCTGGGTCCACTGCAACTTCGCCAGCATCCAAGTATGACTC  
CCCTTACAGTTTGTCTTTGATTCCAGGGTCACTTCTCGAATGTCACAATTCATATCCATCCCACGACCATACGAAAGTTTTATTCGATATT  
TATTTCAAAAATGTACATCCGATGGTTCGTCACATGACACAAGTCAACAACGTACCTTTTACAAAACCCAAATTTCTGAGTTACTCGATGAGAATA  
CTGGCCGGCACAAAATTCAAAAGTCTCGAGGCTAGCTCATTTTCTATGTACCTGGCTGCTGTGACGAGCATGACAAAATGAAGAATGCCTTGAGCT  
TTTAAATGAAGAAAGACAGATTTTAGTAACAAGGTACAAAACCTGCGACTGAGATTGCTCTTCAAGAATCAGATTTTCTTAATAGTGTAGAAAT  
GTTACTTTTACAAGCTTTAATAACGTATATCGCAGCTATGCGCGCTCATGATCGAAGTCGATCTATATGGGCATTTATCGGTCTTGCAGTCCGCC  
TTGCCCGTGGCATCGGGCTCCACAGGGATGGCACCGGGCTCCACAGAGATGGCAGCAAGGAACCTTTCGATTTGGAAAATGCGAAGGAGAATATG  
GTGGACATTGATTGTAATTGATAACAAGACTTCCGAAGATCGGGGTACGGAAACTATGATCACGGATGGCTCTTTCGATACAAAGATGCCCTGCC  
AATATAAATGACGAGGATATAACGATAAACTCAAAAACCTACCCGGTTCGATCGGTTAGGATTCACCAGTATGACCTTTGCTTGCATTACAATGA  
CAGTCAGCGGGATCGGATTGAGGATGAATTTTGTACCTACGCGCCTAGACGCGCGGTCTTGACCACAGAACAAAAGAGCAGATGATCAAAGG  
ATTTACTGACAAAAGTTGATTCTACCTATGTCACATGTTCTGATCCCAATGATCCAAGATTGTGGTGGTTTTCTCGGGTATCACGACTATTATCG  
CTCAAGTTATGGTTGGCGACACAATATCCACTTCAGCGAAGGAAATCTACAAATCGAGTGCCTTCTCGGGGACAATCCTTGCCTACAGCTATGG  
CATTCTTAAATTTGGCGGAAGAAAATATGGCAATATGAACCTTCAAAGGGATGGTCTTGGTCTTTCAAAAGTTATGTGCCGTGGCATGCAATTGC  
GGTTGCTTTAGCTGAGCTTTGTGCGGAACCAACTGGCCCTCTTGCCGATCAAGCTTGGGGGAGTATCGAGTTTCATTACAATAAATGGAGTGAA  
TTCGTTGCAGATACAAAAGATGGGATGATTTGGCGGCCAGTCAAGAATTTAATGAAAAGAGCAAAAGCAGCAAGAAGGCGAGAAAGAGGTCTCA  
GTGAATCTCAAGCATCAACAACCTCAACGGCAATTTCTCAATCCTAATACATACAGCCAGCTCTCGGTCTAGGTGCTGAATTTCTCACCATCAT  
GTCGGAGAATAAATAACTACCGTCAACCTTCTACAATTTGGGCAGGTTGATCCAATGGGGCAGAATATTTACGGGGGGATGAGCTTCGATCTTCCC  
ATGCCCATGTGTTCTACCCCTCAGACACGAATATGGCATCCCCACTACCTATTCGGACGGTTACACAAATCCGCACTGGAACGAATTCATAT  
TTGGTTTAGGAACAGTTGGTAGCGATGGACCCAGAATCCAGA

>Bcin05g01790(mrr1), partial sequence [organism=Botrytis cinerea, strain N11\_K\_W06]  
CAGGCATCTGGCACGGAATGCATTTTCCCTACACGTGTTTCGGAACCCAAGACCGAGACAAAGCAATCCAAAGTCTCGTGATTCTGAGCTATTAA  
AAAGAATCTCTCACCTCGAAAGTTTGGTGAGCAGAATTGATGCCTCAAAACTCCTTGGGGAGGATGGTCATGTAGAAGACGAGGTTCCGGTCAA  
TCCACCATCGTCAGGACCGCGACCTCATCGTTCTTTACAGTCTCCAGACCACCAATACAATGACAATCATCATGAGTTCGGAATAGTACCAGGT  
CGTATGGCTCATCAATTTGCTGATTTTATCAAACGCCAAGAGACCGACTCGATTTACACCCATGATGGATTTTGGACAAGACTAAGTGAAGAAA  
TTGATGGATTGAAACAGCTCATCGAGAGCCCTAGTGACGATGAAGATGAAAAATCTGGGTCCACTGCAACTTCGCCAGCATCCAAGTATGACTC  
CCCTTACAGTTTGTCTTTGATTCCAGGGTCACTTCTCCAATGTCACAATTCATATCCATCCCACGACCATACGAAAGTTTTATTCGATATT  
TATTTCAAAAATGTACATCCGATGGTTCGTCACATGACACAAGTCAACAACGTACCTTTTACAAAACCCAAATTTCTGAGTTACTCGATGAGAATA  
CTGGCCGGCACAAAATTCAAAAGTCTCGAGGCTAGCGCATTTTCTATGTACCTGGCTGCTGTGACGAGCATGACAAAATGAAGAGTGCCTTGGAGCT



```
AAGAAATATGGCAATATGAACCTTCAAAGGGATGGTTCCTGTTCTTTCAAAGTTATGTGCCGTGGCATGCAATTGCGGTTGCTTTAGCTGAGCT
TTGCGCGGAACCAACTGGCCCTCTTGCCGATCAAGCTTGGGGGAGCATCGAGTTTCATTACAATAAATGGAGTGAATTCGTTGCAGATACAAAA
GATGGGATGATTTGGCGGCCAGTCAAGAATTTAATGAAAAAGCAAGAGCAGCAAGAAGGCGAGAAAGAGGTCTCAGTGAATCTCAAGCATCAA
CAACTCCAACGGCAATTTCTCAACCCTAATACATACAGCCCAGCTCTCGATCTAGGTGCTGAATTTCTCACCAATCATGTCCGAGAATAATAACTA
CCGTCAACCTTCTACAATTGGGCAGGTTGACCAATGGGGCAGAATATTTACGGGGGGATGAACTTCGATCTTCCCATGCCCATGTGTTCTACC
CCCTCAGACACGAATATGGCATCCCCTACTTATTCGGACGGCTATACAAATCCGCACTGGAACGAATTCATATTTGGTTTAGGAACAGTTG
GTAGCGATGGACCCCAAAATCCAGA
```

>Bcin05g01790(mrr1), partial sequence [organism=Botrytis cinerea, strain N11\_S\_E10]

```
CAGGCATCTGGCACGGAATGTATTTTCCCTACACGTGTTTCGGAACCCAAGACCGAGACAAAGCAATCCAAAGTCTCGTGATTCTGAGCTATTAA
AAAGAATCTCTCATCTCGAAAGTTTGGTGAGCAGAATTGATGCCCTCAAACCTCCTTGGGGAGGATGGTCAGGTAGAAGACGAGGTTCCGGTCAA
TCCGCCATCATCAGGACCGCGACCTCATCGTTCTTTACGCTCTCCAGACCACCAATACAATGACAATCATCATGAGTTTGGAAATAGTACCAGGT
CGTATGGCTCATCAATTTGCTGATTTTATTAACGCCAAGAGACCGACTCGATTTACACTCATGATGGATTTTGGACAAGACTAAGTGAAGAAA
TTGATGGATTGAAACAGCTCATCGAGAGCCCAGTGACGACGAAGATGAAAATTTCTGGGTCCACTGCAACTTCGCCAGCATCCAAGTATGACTC
TCCTTACAGTTTGTCTTTGATTCAGGGTCACTTCCCTCGAATGTCATAATTCATATCCATCCCAGACCATAACAAAGTTTTATTCGATATT
TATTTCAAATAATGTACATCCGATGGTTCGTCATATGCACAAGCCAACAACGTACCTTTTACAAAACCCAAATTTCTGAGTTACTCGATGAGAATA
CTGGCCGGCACAAATTCAAAAGTCTCGAGGCTAGCGTGTGCTATGTACCTGGCTGCTGTGACGAGCATGACAAATGAAGAGTGCCTTGAGCT
TTTAAATGAAGAAAGAAATATTTTAGTAACACGGTACAAAACCTGCGACTGAGATTGCTCTTCAAGAATCAGATTTTCTTAATAGTGTGAAAT
GTTACTTTACAAGCTTTAATAACGTATATCGCAGCTATGCGCACTCATGATCGAAGTCGATCTATATGGGCATTTATCGGTTCTGCAGTCCGCC
TTGCCCGTGGCATCGGGCTCCACAGAGATGGCAGCCAGCAACCTTTGATTTGGAAATGCGAAGGAGAGTGTGGTGGACATTGATTGTACTTGA
TACAAGAGCTTCCGAAGATCGGGGTACAGAAACCATGATCACTGATGGCTCTTTGATACAAAGATGCCTGCCAACATAAACGACGAGGATATG
ATGATAAACTCAAAGAGTCTACCGGTCGATCGGATAGGGATCACCAGTATGACCTTGTGCTTGCATTACAATGACAGTCAGCGGGATCGGATTGA
GGATGAATTTTGTACTACGCGCTAGACGCGCCGGTCTTGACCACAGAACAAAAAGAGCAGATGATCAAAGGATTTACTGACAAAATCGATTC
TACCTATCTCGCAGGTTCTGATCCCAATGATCCAAGATTGTGGTGGTATTGTGCGATATCACGACTATTATCGCTCAAGTTATGGCTGGTGACA
CAATATCCACTTCAACGAAGGAAATCTACAAATCGAGTGCTTCTCGAGGACAATCCTTGCCTACAGCTATGGCATTCCTAAATTTGGCGGAAG
AAATATGGCAATATGAACCTTCAAAGGGATGGTCTGGTCTTTCAAAGTTATGTGCCGTGGCATGTAATTCGCGTTGCTTTAGCTGAGCTTTG
TGCGGAACCAACTGGCCCTCTTGCCGATCAAGCTTGGGAGGGCATTGAGTTTCACTACAATAAATGGAGTGAATTCGTTGCAGATACAAAAGAT
GGGATGATTTGGCGACCAGTCAGGAATTTAATGAAAAGAGCAAGAGCAGCAAGAAGGCGAGAAAGAGGTCTCAGTGAATCTCAAGCATCAACAA
CTCCAACGGCAATTCGCAACCTAATACATACAGCCAGCTCTCAATCTAGCTGCTGGATGCTCCCGATCATGTCCGAGAACAACTACTG
TCAATCTTCTACAATTTGGACAGGTTGACCCAATGGGGCAGAATATTTACGGGGGAAATGGGCTTCGATCTTCCCATGCCCATGGGTTCTACCCCC
TCAGACACGAATATGGCATCCCCTACTTATTCGGACGGCTATACAAATCCGCACTGGAACGAATTCATATTTGGTTTAGGAACAGTTTGTGTA
GCGATGGACCCCAAAATCCAGA
```

>Bcin05g01790(mrr1), partial sequence [organism=Botrytis cinerea, strain N11\_S\_E15]

```
CAGGCATCTGGCACGGAATGTATTTTCCCTACACGTGTTTCGGAACCCAAGACCGAGACAAAGCAATCCAAAGTCTCGTGATTCTGAGCTATTAA
AAAGAATCTCTCATCTCGAAAGTTTGGTGAGCAGAATTGATGCCCTCAAACCTCCTTGGGGAGGATGGTCAGGTAGAATACGAGGTTCCGGTCAA
TCCGCCATCATCAGGACCGCGACCTCATCGTTCTTTACGCTCTCCAGACCATCATGAGTTTGGAAATAGTACCAGGTGATGGCTCATCAATTT
GCTGATTTTATTAACGCCAAGAGAACGACTCGATTTACACTCATGATGGATTTTGGACAAGACTAAGTGAAGAAATGATGGATTGAAACAGC
TCATCGAGAGCCCCAGTGACGATGAAGATGAAAATTTCTGGGTCCACTGCAACTTCGCCAGCATCCAAGTATGACTCTCCTTACAGTTTGTCTT
TGATTCCAGGGTCACTTCCCTCGAATGTCATAATTCATATCCATCCCAGACCATAACAAAGTTTTATTCGATATTTATTTCAAATAATGTACAT
CCGATGGTTCGTCATATGCACAAGCCAACAACGTACCTTTTACAAAACCCAAATTTCTGAGTTACTCGATGAGAATACTGGCCGGCACAAATTC
AAAGTCTCGAGGCTAGCGTGTGCTATGTACCTGGCTGCTGTGACGAGCATGACAAAATGAAGAGTGCCCTGAGCTTTTAAATGAAGAAAGAAA
TATTTTAGTAACACGGTACAAAACCTGCGACTGAGATTGCTCTTCAAGAATCAGATTTTCTTAATAGTGTGAAATTTGTTACTTTACAAGCTTTA
ATAACGTATATCGTAAGTGTGTTCTCTTAAGCATCTTGGATGATGGTTTTATGATGATGATGATGATGATGATGTTTTATGTACTTTACAGGCAGCT
ATGCGCACTCATGATCGAAGTCGATCTATATGGGCATTTATCGGTTCTGCAGTCCGCCCTTGGCCGTGGCATCGGGCTCCACAGAGATGGCAGCC
AGCAACCTTTGATTTGGAAATGCGAAGGAGAGTGTGGTGGACATTGATTGTACTTGATACAAGAGCTTCCGAAGATCGGGGTACAGAAACCAT
GATCACTGATGGCTCTTTGATACAAAGATGCCTGCCAACATAAACGACGAGGATATGATGATAAACTCAAATAAGTCTACCGGTCGATCGGATA
GGGATCACCAGTATGACCTTTGCTTGCATTACAATGACAGTCAGCGGGATCGGATTGAGGATGAATTTTGTACTACGCGCTAGACGCGCCGG
TCTTGACCACAGAACAAAAAGAGCAGATGATCAAAGGATTTACTGACAAAATCGATTTTACCCTATCTCGCAGGTTCTGATCCCAATGATCCAAG
ATTGTGGTGGTATTGTGCGGATATCACGACTATTATCGCTCAAGTTATGGCTGGTGCACAAATATCCACTTCAACGAAGGAAATCTACAAATCGA
GTGCTTCCCTCGAGGACAATCCTTGCCTACAGCTATGGCATTCCTAAATTTGGCGGAAGAAATATGGCAATATGAACCTTCAAAGGGATGGTCT
GGTCTTTCAAAGTTATGTGCCGTGGCATGTAATTCGCGTTGCTTTAGCTGAGCTTTGTGCGGAACCAACTGGCCCTCTTGGCCATCAAGCTTG
GGAGGGCATTGAGTTTCACTACAATAAATGGAGTGAATTCGTTGCAGATACAAAAGATGGGATGATTTGGCGACCAGTCAGGAATTTAATGAAA
AGAGCAAGAGCAGCAAGAAGGCGAGAAAGAGGTCTCAGTGAATCTCAAGCATCAACAACCTCAACGGCAATTCGCAACCTAATACATACAGCC
CAGCTCTCAATCTAGCTGCTGGATGCTCCCGATCATGTCCGAGAACAACTACTGTCAATCTTCTACAATTTGACAGGTTGACCCAATGGG
GCAGAAATTTACGGGGGAAATGGGCTTCGATCTTCCCATGCCCATGGGTTCTACCCCCCAGACACGAATATGGCATCCCCTACTTATTCGG
GACGGCTATACAAATCCGCACTGGAACGAATTCATATTTGGTTTAGGAACAGTTTGTAGCGATGGACCCCAAAATCCAGA
```

>Bcin05g01790(mrr1), partial sequence [organism=Botrytis cinerea, strain T4]

```
CAGGCATCTGGCACGGAATGTATTTTCCCTACACGTGTTTCGGAACCCAAGACCGAGACAAAGCAATCCAAAGTCTCGTGATTCTGAGCTATTAA
```

AAAGAATCTCTCATCTCGAAAGTTTGGTGAGCAGAATTGATGCCCTAAAACCTCCTTGGGGAGGATGGTCAGGTAGAATACGAGGTTCCGGTCAAA  
TCCGCCATCATCAGGACCGCGACCTCATCGTTCTTTACAGTCTCCAGACCATCATGAGTTTGGAAATAGTACCAGGTCGTATGGCTCATCAATTT  
GCTGATTTTATTAACGCCAAGAGAACGACTCGATTTACACTCATGATGGATTTTGGACAAGACTAAGTGAAGAAATGATGGATTGAAACAGC  
TCATCGAGAGCCCCAGTGACGATGAAAGATGAAAAATCTGGGTCCACTGCAACTTCGCCAGCATCCAAGTATGACTCTCCTTCACAGTTTGTCTT  
TGATTCCAGGGTCACTTCCCTCGAATGTCATAATTCATATCCATCCCACGACCATACCAAAGTTTTATTCGATATTTATTTCAAAAATGTACAT  
CCGATGGTCGTACTATGCACAAGCCAACAACGTACCTTTTCACAAACCCAAATTTCTGAGTTACTCGATGAGAATACTGGCCGGCACAATTTCA  
AAAGTCTCGAGGCTAGCGTGTGCTATGTACCTGGCTGCTGTGACGAGCATGACAAAATGAAGAGTGCCTTGAGCTTTTAAATGAAGAAAGAAA  
TATTTTAGTAACACGGTACAAAACCTGCGACTGAGATTGCTCTTCAAGAATCAGATTTTCTTAATAGTGTGAAATTTGTTACTTTTACAAGCTTTA  
ATAACGTATATCGTAAGTGTCTCTCTAAGCATCTTGGATGATGGTTTTATGATGATGATGATGATGATGATGTTTTATGTACTTTTACAGGCAGCT  
ATGCGCACTCATGATCGAAGTCGATCTATATGGGCATTTATCGGTCTTGCAGTCCGCCCTTGCCCGTGGCATCGGGCTCCACAGAGATGGCAGCC  
AGCAACCTTTTCGATTTGGAAATGCGAAGGAGAGTGTGGTGGACATTTGATTGTACTTGATACAAGAGCTTCCGAAGATCGGGGTACAGAAACCAT  
GATCACTGATGGCTCTTTTCGATACAAAAGATGCCTGCCAACATAAACGACGAGGATATGATGATAAACTCAAAAAGTCTACCGGTGATCGGATA  
GGGATCACCAGTATGACCTTTGCTTGCATTACAATGACAGTCAGCGGGATCGGATTGAGGATGAATTTTGTACTACGCGCTTAGACGCGCCGG  
TCTTGACCACAGAACAAAAAGAGCAGATGATCAAAGGATTTACTGACAAAATCGATTTTACCTATCTCGCAGGTTCTGATCCCAATGATCCAAG  
ATTGTGGTGGTATTGTGCGGATATCACGACTATTATCGCTCAAGTTATGGCTGGTGACACAATATCCACTTCAACGAAGGAAATCTACAAATCGA  
GTGCTTCCCTCGAGGACAATCCTTGGCTACAGCTATGGCATTCCTAAATTTGGCGGAAGAAATATGGCAATATGAACCTTCAAAGGGATGGTTCT  
GGTCTTTCAAAGTTATGTGCCGTGGCATGTAATTCGGTTGCTTTAGCTGAGCTTTGTGCGGAACCAACTGGCCCTTTCGCCATCAAGCTTG  
GGAGGGCATTGAGTTTCACTACAATAAATGGAGTGAATTCGTTGCGAGATACAAAAGATGGGATGATTTGGCGACCAGTCAGGAATTTAATGAAA  
AGAGCAAGAGCAGCAAGAAGGCGAGAAAAGAGGTCTCAGTGAATCTCAAGCATCAACAACCTCCAACGGCAATTCGCAACCCATAATACATACAGCC  
CAGCTCTCAATCTAGCTGCTGGATGCTCCCGATCATGTGCGAGAACAATAACTACTGTCAATCTTCTACAATTTGGACAGGTTGACCCAATGGG  
GCAGAAATTTACGGGGGAATGGGCTTCGATCTTCCATGCCATGGGTTCTACCCCTCAGACACGAATATGGCATCCCCTACCTATTTCCG  
GACGGCTATACAAAACCCGCACTGGAACGAATTCATATTTGGTTTAGGAACAGTTTGTAGCGATGGACCCCAAAATCCAGA

>Bcin05g01790(mrr1), partial sequence [organism=Botrytis calthae, strain BcalMUCL2830]

CAGGCATCTGGTACGGAATGTATCTTCCCTACACGTGTTTCGGAACCCAAGACCGAGACAAAGCAATCCAAAGTCTCGTGATTTCTGAGCTATTGA  
AGAGAATCTCTCACCTCGAAAGTTTGGTGAGCAGAATTGATGCCCTAAAACCTCCTTGGGGAGGATGGTCAGGTAGATGACGAGGTTCCGGTCAAA  
TACACCATCCTCAGGACCGCGACCTCATCGTTCTTTACAGTCTCCAAACCACCAATACAATGACAATCACCATGAGTTTGGAAATAGTACCAGGA  
CGTATGGCTCATCAATTTGCTCATTTTATTAACGCCAAGAGACCGACTCGATTTACACTCATGATGGATTTTGGACAAGATTAAGTGAAGAAA  
TTGATGGATTGAAGCAGCTCATCGAGAGCCCCAGTGATGATGAAGATGAAAAATCTGGGTCAACTGCAACTTCGCCAGCATCCAAGTATGACTC  
CCCTTCACAGTTTGTCTTTGATTCCAGGGTCACTTCCCTCGAATGTCATAATTCATATCCATCCCACGACCATGTCAAAAATTTTATTCGATTTT  
TATTTCAAAAATGTACATCCGATGGTTCGCTACTATGCACAAGCCAACAACGCACCTTTTCACAAACCCAAATTTCTGAGTTATTTGATGAGAATA  
CTGGCCGGCACAATTTCAAAGTCTTGGAGCTAGCGCATTGCTATGTACCTGGCTGCTGTGACAAGCATGACAAAATGAAGAGTGCCTTAAGCT  
TTTAAATGAAGAAAAGACATATTTTAGTAACACGGTACAAAACCTGCGACTGAGATTGCTCTTCAAGAATCAGATTTTCTTAATAGTGTAGAAAT  
GTTACTTTACAAGCTTTAATAACGTATATCGTAAGTGTCTCTCTAAGCATCTTGGATGATGGTTTTATGATGATGATGATGTTTTATGTACTA  
TCACAGGCAGCTATGCGCACTCATGATCGAAGTCGATCTGTATGGGCATTTATCGGTCTTGCAGTCCGCCCTTGCCCGTGGCATCGGGCTCCACA  
GAGATGGCAGCCAGCAACCTTTTCGATTTGGAAATGCGAAGGAGATATGGTGGACGTTGATTGTACTTGATACAAGAGCTTCCGAAGATCGGGG  
TACAGAAACCATGATTACTGATGGCTCTTTTCGATACAAAAGATGCCTGCCAACGTAACGACGAGGATTTAACGATAAACTCAAAAACCTTACCG  
GCCGATCGGATAGGACTCACCAGTATGACCTTTGCTTGCATTACAATGACAGTCAGCGGGATCGGATTGAGGATGAATTTTGTACTACGCGCC  
TAGACGCGCCGGTCTTGACCACAGAACAAAAAGAGCAGATGATCAAAGGATTTACTGACAAAATCGATTTTACCTATCTCGTAGGTTCTGATCC  
CAATGATCCAAGAAATGTGGTGGTTTTGTGCGGATATCACGACTATTATCGCTCAAGTTATGGTTGGTGATACAATATCCACTTCAGCGAAGGAAA  
TCTACAAAATCGAGTGTCTTCCCTCGAGGACAATCCTTGGCTACAGCTATGGCATTCCTAAATTTGGCGGAAGAAATATGGCAATATGAACCTTCAA  
AGGGATGGTTCTGGTTCTTTCAAAGTTATGTGCCGTGGCATGCAATCGCGGTTGCTTTAGCTGAGCTTTGTGCGGAACCAACTGGCCCTCTTGC  
CGATCAAGCTTGGGAGGGCATTGAGTTTCAATTAATAAATGGAGTGAATTCGTTGCGAGATACAAAAGATGGGATGATTTGGCGACCAGTCAAG  
AATTTAATGAAAAGAGCAAGAGCAGCAAGAAGGCGAGAAAAGAGGTCTCAGTGAATCTCAAGCATCAACAACCTTCAACGGCGATTCCCAACCCCTA  
ATACATACAGCTCAGCTCCCAATCTAGGTGCTGAATTTCTCTCCAACCATGTGCGGAGAAATAATGTCTACCGTCAACCTTCTACAATTTGTGCAGGT  
TGACCCAATGGGGCAGAATATTTATGGGGGATGGGCTTCGATCTTTCCATGCCATGGGTTCTACCTCCTCAGACACGAATATGGCATCCCCA  
CTATCTATTCGGACGGCTATACAAAATCCACTGGAACGAATTCATATTTGGTTTAGGAACAGTTGGTAGCGATGGACCTCAAAAATCCAGA

>Bcin05g01790(mrr1), partial sequence [organism=Botrytis cinerea, strain D08\_H\_8\_3]

CAGGCATCTGGCAGGAAATGCATTTTCCCTACACGTGTTTCGGAACCCAAGACCGAGACAAAGCAATCCAAAGTCTCGTGATTTCTGAGCTATTAA  
AAAGAATCTCTCACCTCGAAAGTTTGGTGAGCAGAATTGATGCCCTAAAACCTCCTTGGGGAGGATGGTCAGGTAGAAGACGAGGTTCCGGTCAAA  
TCCACCATCGTACGACCGCGACCTCATCGTTCTTTACAGTCTCCAGACCACCAATACAATGACAATCATCATGAGTTCCGGAATAGTACCAGGT  
CGTATGGCTCATCAATTTGCTGATTTTATCAAACGCCAAGAGACCGACTCGATTTACACCCATGATGGATTTTGGACAAGACTAAGTGAAGAAA  
TTGATGGATTGAAACAGCTCATCGAGAGCCCCAGTGACGATGAAGATGAAAAATCTGGGTCCACTGCAACTTCGCCAGCATCCAAGTATGACTC  
CCCTTCACAGTTTGTCTTTGATTCCAGGGTCACTTCCCTCAATGTCACAATTCATATCCATCCCACGACCATACGAAAGTTTTATTCGATATT  
GATTTCAAAAATGTACATCCGATGGTTCGCTACTATGCACAAGCCAACAACGTACCTTTTCACAAACCCAAATTTATGAGTTACTCGATGAGAATA  
CTGGCCGGCACAATTTCAAAGTCTCGAGGCTAGGGCATTCTTCTATGTACCTGGCTGCTGTGACGAGCATGACAAAATGAAGAGCGCTTGAGCT  
TTTAAATGAAGAAAAGACAGATTTTAGTAACAAGGTACAAAACCTGCGACTGAGATTGCTCTTCAAGAATCAGATTTTCTTAATAGTGTAGAAAT  
GTTACTTTACAAGCTTTGATAACGTATATCGTAAGTATTTCTCTCTCAGCATCTTGAATGATGGTTTTATGATGATGATGATGATGTTTTATGTA

```
CTTTCACAGGCAGCTATGCGCGCTCATGATCGAAGTCGATCTACATGGACATTTATCGGTCTTGCAGTCCGCCCTTGCCCCTGGCATCGGGCTCC
ACAGGGATGGCACCGGGCTCCACAGAGATGGCAGCAAGCAACCTTTCGATTTGGAAATGCGAAGGAGACTATGGTGGACATTGATTGTACTTGA
TACAAGAGCTTCCGAAGATCGGGGTACGGAACTATGATCACTGATGGCTCTTTCGATACAAAAGATGCCCTGCCAATATAAAATGATGAGGATATA
TCGATAAACTCAAAAACTCTACCGGTCGATCGGCTAGGATTAACCAGTATGACCTTTGCTTGCATTACAATGACAGTCAGCGGGATCGGATTGA
GGATGAATTTTGTACCTACGCGCCTAGACGCGCCGGTCTTGACCACAGAACAAAAAGAGCAGATGATCAAAGGATTTACTGACAAAATCGATTC
TACCTATGTACATGTTCTGATCCCAATGATCCAAGATTGTGGTGGTTTTGTGCGGGTATCACGACTATTATCGCTCAAGTTATGGTTGGCGACA
CAATATCCACTTCAGCGAAGGAAAATCTACAAAATCGAGTGCTTCTTCGAGGACAATCCTTGCCTACAGCTATGGCATTCTTAAATTTGGCGGAAG
AAATATGGCAATATGAACCTTCAAAGGGATGGTTCTGGTTCTTTCAAAGTTATGTGCCGTGGCATGCAATTGCGGTTGCTTTAGCTGAGCTTTG
TGCGGAACCAACTGGCCCTCTTGCCGATCAAGCTTGGGGGAGCATCGAGTTTCATTACAATAAAATGGAGTGAATTCGTTGCAGATACAAAAGAT
GGGATGATTTGGCGGCCAGTCAAGAGTTAATGAAAAGAGCAAAAGCAGCAAGAAGGCGAGAAAAGAGGTCCTCAGTGAATCTCAAGCATCAACAA
CTCCAACGGCAATTTCTCAACCTAATACATACAGCCCAGCTCTCGATCTAGGTGCTGAATTTCTCACC AATCATGTCCGAGAATAATAACTACCG
TCAACCTTCTACAATTTGGGCAGGTTGACCCAATGGGGCAGAATATTTACGGGGGGATGAGCTTCGATCTTCCCATGCCCATGTGTTCTACCCCC
TCAGACACGAATATGGCATCCCCTACTACCTATTCGGACGGTTATACAAAATCCGCACTGGAACGAATTCATATTTGGTTTAGGAACAGTTGGTA
GCGATGGACCCCAAGATCCAGA
```

```
>Bcin05g01790(mrr1), partial sequence [organism=Botrytis pseudocinerea, strain BpsVD256]
CAGGCATCTGGCACGGAATGTATTTTCCCTACACGTGTTTCGGAATCCAAGACCGAGACAAAGCAATCCAAAGTCTCGTGATTTCTGAGCTATTGA
AAAGAATCTCTCATCTCGAAAGTTTGGTGAGCAGAAATGATGCCTCAAAAATCCTTGGGGAGGATGGTCAGGTAGAAGACGAGGTTCCGGTCAAA
CCCACCATCATCAGGACCGCGACCTCATCGTTCTTTCACGTCTCCAGACCGCCAATACAATGACAACCACCATGAGTTTGGAAATAGTACCAGGT
CGTATGGCTCATCAATTTGCTGATTTTATTAACGCCAAGAGACCGACTCGATTTACACTCATGATGGATTTTGGACAAGATTAAGTGAAGAAA
TTGATGGATTGAAAACAGCTCATCGAGAGCCCAGTGACGATGAAGATGAAATTTCTGGGTCAACTGCAACCTCGCCAGCATCCAAGTATGACTC
CCCTTACAGTTTGTCTTTGATTCAGGGTCACTTCTCGAATGTCATAATTCATATCCATCCCACGACCATAACAAAATTTTATTCGATATT
TATTTCAAAAATGTACATCCGATGGTTCGTCATATGCACAAGCCAACAACGTACCTTTTCTCAAAAACCAAATTTGTGAGTTAATGGATGAGAATG
CTGGCCGGCACAAAATTCAAAAGTCTCGAGGCTAGCGCATTTTATATGTACCCGGCTGCTGTGACGAGCATGACAAATGAAGAGTGCCCTTGAGCT
TTTAAATGAAGAAAGACAGATTTTAGTAACAAGGTACAAAATGCGACTGAGATTGCTCTTCAAGAATCAGATTTTTTTAATAGTGTAGAAAT
GTTACTCTACAAGCTTTAATCACGTATATCGTAAGTGTFTCTCTCTACACATCTTAGATGATAGTTTTTACGATGATGATGATGTTTTATGTACTT
TCACAGGCAGCTATGCGCACTCATGATCGAAGTCGATCTACATGGGCATTTATCGGTCTTGCAGTCCGCCCTTGCCCCTGGCATCGGGCTCCACA
GGGATGGCAGCACGAATCTTTCGATTTGGAAATGCGAAGGAGAATATGGTGGACATTGATTGTACTTTGATACAAGAGCCTCCGAAGATCGGGG
TACAGAACTATGATCACTGATGGCTCTTTCGATACAAAAGATGCCCTGCCAATATAAAATGACGAGGATATCTTGATAGACTCAAAAATCTACCA
GTCGATCGGATAGGATTCACCAGTATGACCTTTGCTTGCATTACAATGACAGTCAGCGGGATCGGATTGAGGATGAATTTTGTACCTACGCGCC
TAGACGCGCCGGTCTTGACCACAGAACAAAAAGAGCAGATGATCAAAGGATTTACTGACAAAATCGATTTCTACCTATGTCACAGGTTCTGATCC
CAATGATCCAAAATTTGTGGTGGTTTTGTGCGGATATCACGACTATTATCGCTCAAGTTATGGTTGGCGACACAATACCCACTTCAGCGAAGGAAA
TCTACAAAATCGAGTGCTTCTTCGAGGACAATCCTTGCCTACAGCTATGGCATACTTAAATTTGGCGGAAGAAAATATGGCAATATGAACCTTCAA
AGGGATGGTTCTGGTTCTTTCAAAGTTATGTGCCGTGGCATGCAATTGCGGTTGCTTTAGCTGAGCTTTGTGCGGAACCAACTGGCCCTCTTGC
CGATCACGCTTGGGGGAGCATTGAGTCTCATTACAATAAAATGGAGTGAATTCGTTGCAGATACAAAAGATGGGATGATTTGGCGGCCAGTCAAG
AATTTAATGAAAAGAGCAAGAGCAGCAAGAAGGCGAGAAAAGAGGTCCTCAGTGAATCTCAAGCATCAACAACTCCAACGGCAATTTCTCAACCTA
ATATATACAGCCCAGCTCTCGATCTAGGTGCTGAATTTCTCACC AATCATGTCCGAGAATAATAACTACCGTCAACCTTCTACAATTTGGGCAGGT
TGACCCAATGGGGCAGAATATTTACGGGGGGATGAGCTTCGATCTTCCCATGCCCATGTGTTCTACCCCCCTCAGACACGAATATGACATCCCC
ACTACCTATTCGGACGGCTATACAAAATCCGCACTGGAATGAATTCATATTTGGCTTAGGGAACAGTTGGTAGCGATGGACCCCAAAACCCAGA
```
