# Supplementary material for: Genetic Diversity of Botrytis cinerea Revealed by Multilocus Sequencing, and Identification of B. cinerea Populations Showing Genetic Isolation and Distinct Host Adaptation
Source: PubMed Central journal article supplement (PMC8131559; doi:10.3389/fpls.2021.663027), 2021-05-05
Supplement: Data_Sheet_3.pdf [file Data_Sheet_3.pdf]

>Bcin01g07220 (MLST1), partial sequence [organism=Botrytis calthae, strain MUCL2830]  
GATGGCATATCTTGTTCCTTTTCGCATTATGCTTTAGAACGCGCTGGACAAGCTTGGGTCAGTGCTCTACGTGTAGAAGCACTAAAGAAGATTC  
TCGCACAACCGAAGTCATGGTTTGGAGGAATCCAGTAATTCACCTGGCCGGTTGAACGGAAGTTTTGGATAGGAACTCCGAGGAAATGCGTAATCT  
CGTTGGTCGCTTTGTTGGTATTGTATTACAGCATTTTTTATGCTATTGATATCAATCATCTGGGCTTTCGTGAATACATGGAAACTGTCATTA  
GTCTCAATGGCAACTGGGCCAGTTATATACGGTGTACACAAAACCTTCAATCGCGTGAGTGGAAAATGGGAAAACAAGTGAACACTACGCATCTG  
AAATGGCCACCGGCATATTTTTCAGAGACTTCTCCAACATCAAAGTGGTTCGGGCTTTTACTCTGGAAACTTACTTTGAGACAAAACACACCAA  
AGCTACAGAAGAAGCTTTATAAAGTTGGACTAATGCGAGCAAACACTACTCGGGATTACTGTGGGGACTGACAGATGCGATGTCATTTTCATCACT  
GCAACTATCTTTTATTATGCCACGGTTCTCATTACCAAGAGAGAGATCAGTATCGCGACTGCACACTACAGACTGTCAATCTTTTTATTATTTGGTA  
TTTTCTAATAGTACGAATATGCTGGCCATGATACCACAAATCAACTCTTCTCGCGTTACAGCTACGCATATGCTTGCATTAGCCAATCTCGATTC  
ATCTTCCTCCACGAAAATAAAGGAACCGAACGGCTTTCGACAATCTTTCCAATCGAATTTAACCGCTCTCATTCACATATCCTGCTCGTCCCT  
GAAAACGGAACGATATCATCTTTTTTCTCTTTCCCTGAGTCTAACTCAACAACTGCACTTGTCCGACCCTCCGGCTCCGGAAAATCTACAATAG  
CTGCTCTGCTAATTGGTCTTTATCCGCCAGATACTTCAACACCTCCACCGTTGACATTTAATCGCGTTTCCATAAGCAACTGTCACATTCGGTC  
TCTCCGGGCTTCTATCTCACTCGTCCACAAAACCGGATTTCTATTTCCAGCTACTATTTCCATAACATCATCTATGGTCTTCCAGAATCTTCT  
CCTTATGCTAATCTTCCATCTGCTATTGCATCAGCCAAAAGATGCTGGGATCCATGAATTTATCACGTCACCTCCACAATGTTATAATACTAT

>Bcin05g07690 (MLST2), partial sequence [organism=Botrytis calthae, strain MUCL2830]  
ACCACCATCACTAAGTCTTTTCTGCACTTTCCTCACAAAAACGAACGAGAATCATCAATAAATACTTTGCTGAAGTAATTGGCTTTTTATT  
TTGGCCAGGATGCCTTCTCTCTACGACAGCAAGCCTATGATGATATGTTATGGGTAGTCTGGGTTGGTTGGTACTGTTAAATTCATTGATTT  
ACACTCTGAATTACACTATTCGAACGACTCTCAGCCAGAATGGTACGGACAACAATATAAACCTGCATTTGCACACCGAGCGGACTGTTTTGG  
GAATTGGCGTCACAAGGATGGGATACTACCCTCTGTGGTGGTGGGATGATATGGTCTCCATACCTTACTCCATAACAAGAAGCAATTACCAATG  
AACTCTATATCGCAGCTTCGATATCGATGTACCTCTATTTCCCTGGAGATGACAATCAATCGCCATTTATGCTTTCCAACCTTTCATACCCACC  
TCGCGATCCGAAAACATCTACAGGCAGCTGTTGATGCTTACAAATGGCTGAATAGTTCCAACATGACGGATTTGCAAGGATTTATATGTCGACGGA  
TATCATATCTCGAATCTTTCTGGCGGTGAAAACACCCATTCGATTTCTAGAAACGAGATGGTATATACCTACAATCAAGGTGTTTTGCTTACTG  
GACAACGTGGTTTGTATGACGCCACCGCCGACGATCATACCTTGTGGATGGCCACAACTCATCGCAATGTTATTAATGCCACAGGCTATGA  
TCTGAAAACACAACGTTGCCATCTCACCGCCACCCAAAAGATGGTTCGAAATGGCAAAGTGGTTTTGGCTGGGTTAGGAATGGAATACTGGAAGAA  
GGTTGCGATGCAAGTGCTTCGTGTTCTCAAAAATGGACAGACTTTCAAAGGCATATCTTTTCATCATTTGATTGCATTTCTGTAGTGATTTGCCAA  
GGGAGCCTATTGCAGGGACGAAAAGAAGGCTTGAACCTCGATAGAGAGTGGCATTCTGAAAAATGCTCACAGTATACAAAATG

>Bcin06g01710 (MLST3), partial sequence [organism=Botrytis calthae, strain MUCL2830]  
TAGGTTCTTAGGACAAAACCAATCTTTAAGCTTCGGAAGCGTCTCCGAGAGGAATTTGCCAGTCCCAGATAGTCGGTTACGAGTCCACTCTCTG  
AAAACCTCGTTGCGAAGATAACTTGGTGTATGGAGAGTGCATCGATCAAATCTTTGCGTTTCTTGACATATAGACAAGAAGCGTCGAAATTTGT  
AAGAAGCCATTTGTGCATGTTTCATATCGAAGGAATGGAAATGTTGGAAGGACGATGTTAGATGATGGTATTCAGGGCAAACCAAAGCTGCACCT  
GCATAAGCAGCATCGACGTGAACCCAGATCTCGCCTGCAACATCTGGAGGAGCATATTTGGAAGCACTGTTGCGATAGACGCGAAGTCAATCAA  
CTGCGCATGTAGATGTTGTTCCCAAAGTTCGAAGTTAGATAGAAGGTTCCAATCCTTGAGATTTGCATTTCTTCAATACCTTCTCTAGATCATC  
ACCCGTCATGGCGAAATCATTGGATGCGAGTACTGGAATCGATCGGAATCTAACGCCAGTATTTGCGCTGCTTTCTGCGTGGAGCTGTGTGCC  
ATTTTCGCTTCTAGTGCAACTAGCTTACTCCTCTTGTGTGCAATCGCATCTCGAGTTCAATACCTGACAGACCTTCAGTAGTTTTCACGAAGAT  
ATTTATCGCGGGCAGCGACCATAACGGTAACGATAGCTTCTGAAGCTGATCCTTGAATGACACCACCACCATGAGTGAAGACAAAATAACAGTC  
TGGGAGATTGAGAAGCTTGGCCAGCCAATCCATTACAACCGTCTCCAATTTCTGTACAGCAGGGGAACAGATCCAATTTGAAAGCAGGAGCTGTG  
AAAGCTGCTGAGTATAATTTCTCAAGCATTTCCAGGGTAGGTAGATGATGCAGGGAAGAAAGCCATGAAATTAGGCGATTGCCTTGGTATATCAG  
TGCTATCTTAACATCCAAAATATAAAAAGTCAGACTCAC

>Bcin09g03030 (MLST4), partial sequence [organism=Botrytis calthae, strain MUCL2830]  
CCCTTCAATCCCACCACAGCTCCTGTACAAAAGCGAGTATCCTACCAATTTCTCTTCCGCCCTCCGACTTTAAGACCATTGGCTTTTTCGCACTT  
TCACAAAAAAGCATAGTTTAAACATTGACGTCGTCGGCATTACAAGTGTGGCTACCTTTTATTGGAAAGCATTGCGGGACAGGATGGAGGGAAGA  
AGGATTGGCAGAGAGAGTTTTAGAGGAGGTTGCAAAGAGTTGGAAGAATAGGAGTGGCGGTGTTATTGTCGAGGGCAGGGGACGGAATTTGAAG  
GAGATTCTGAAAGCTCTGGAAGGGAATATGAGCGGTGGAAGGATAGTCGTAGGAAGAGAAATTAAGCCGGCAGAACAGTTTAGTACTGGGGTCAT  
CACAATATGGAGAGGTTCAATCATAACGAGACTTGGACTACGGCCTGGGAATATACCTAGAGAGGATAGTCAAGTTTGGGGATGTCAACGTT  
GGAGGTTCAATGACGAGGAAGATGAGGATGGCCTGATGGATCCAAGGAGGTGGTTAAAAGTCAATGATGCATTTGAGCAACCTCGACTGGTGTAT  
AATGTTGCTAAGAAGCACTTTGATAGGTATGTTTTAATGATAAAAAATTCATCTGAATCGACTAACTCAGTACAGAGATACCTCCAAACCTTCA  
TTGTTCCACCTGCGTCTCATAAAAACACTTCTCTTCCAAAACCGCTACAATGTTATCCATCAACGCTCTCTTTCGCAATGAATCTTTTTCAAACGC  
CCACTTTTCAAGGTGGCAAAGCTTCCCTTCAACGCGACGACGTCCACTATTACCACCCAGCAACATTCATACAAAATTAACGCCGATAGCTAATCT  
TCTTGGCCGCAATCGCAGCTCTCATATGCTTCTCGGCCCTCCTCAGTATTTACCCACTGGTACCCTCGCCATTAATGACCTGACGGGCAGCATC  
GCTCTCGACCTTACACACGCAACATCCAT

>Bcin11g01310 (MLST5), partial sequence [organism=Botrytis calthae, strain MUCL2830]  
CCACTGACATGGACCTCATGTGAACTGGTGTAGAATGCGCAACGCTTGAAGTTCCGCTCGAATATGGCGACGCGACGTCAACAGCAAAGCCA  
GTGTTGCGCTTGCTCGTTATCTGCCACTGTTGCCGCGAGCAAGAAGCTCGGGTCTCTTTGATAAATCCCGGTGGACCTGGTGCCAGTGGTGT

TGGATTGTGCAGTCTGGGGCCGGTGCCCGGCTCAACACTGAGTGGTGGATTATATGATATCATCGGATGGGATCCACGTGGAACCGGTGCT  
TCGGCTCCTATTTTGAATGTTTTCAAATGCCACTGCGGAGTATGATTTTAAACAACGCGTTTCCATCTGCTCCAAATCTCTGGCTCGGACAA  
TTTCGAATGCCAGCGCAGATTCTGCTGTTAGCTCTGCTATCACATCTTTCGACTCTTCTGTCGCTGCTCTTGCAGAAGCTTGTGTGGCTCAGAA  
TTCTCCCGCTCTGTACACCTCAACAGCAGCATATGTTGCTCGAGACATGGCAGCGATAGTCGATGCATTGGATGGGACCTCTGCAAACTCAAC  
TACTGGGGTTTCTCATATGGAACCATTTTCCCTCGCCGAGTTTATCCAACTTTCCAGGTGCGGTGGGAAGAATTCCTTGCCGATGGTGTTTTTG  
ACGAGAGGCAAATGCCCTCACTTACGTTAGCCAACCTCCCAACGATCAACTCAGTGTTCGTGCTTCGTTAAACGATTTTGCAGCTTCTGCAC  
CACCGCCGGTAGTGAGGTTGCTCTTTTGCACCCGCTCCTGCTGGAACCACAGGTAAGTGTGCCACTAGACTGGACAACATAATGGAGGATATG  
TTCTCAATCCTATTGTTGCTTCGGGCTTAAGCATCA

>Bcin15g03910 (MLST6), partial sequence [organism=Botrytis calthae, strain MUCL2830]  
GCCAAAAGCACAAAATCTTCTAACGATGAAGATGATACTCCACTGCCCTTGATCATCTGGCATGGACTCGGCGATAAATTATAAAGCGGATGGTCT  
TGCGCAGGTTGGGAAATTAGCTGAAGCTATTCATCCCGGAATTTTTGTCTATAAATATTCATGTAGATGAGGACGCATCTGCAGATAGGACGGCT  
ACCTTCTTTGAAATCTCACTCGTGAGTACATCCCTAGTTTTTCTTCAAATACCATACTAACTCTCTTACCAAGTTCAAATGAAAAGGTCTG  
CGAAGACCTCGCCTCCATCCTATTCTTTCTACCGCGCCCGCTGTCGACGCAATCGGATTCCTCCAAGGCGGCAATTCCTGCGCGGTTACATA  
TCCCCTGCAATTTCTCCACCCATCCGCTCTCTCTGACCTTCGGCTCCCAACACAACGGCATTTCCTGCTTCCAAGCCTGTGGTCTTACCGATT  
TCCTCTGTGCGGGTCTCAAACCTTTTGCATCCAACACCTGGTCAACCTTTGTCCAATCTCGTCTCGTACCCGCTCAATACTTCAGAGATCC  
GGAAAACCTAGACTCTTACCTTGAACATTCCAATTTCTCGCCGACATCAACAATGAGCGGTTCTCAAGAACGAAACATAATAAATCCAACATG  
GAAAAATTGGAACGATTCGTAATGTACGTTTGAAGACGACACAACCGTCAATTCCTAAGGAAAGTGGATGGTGGGCTGAAGTCAACGGTACGG  
AAGTTACACCACTGAAAGAAAGAGCCATTTATAAAGAAGATTGGGTAGGATTGAAGACATGGATGAGGCTGGAAAATTAGTTTTTCGAAACCAT  
TCCAGGGGGTTCATATGACGTTAGGAGAAGAAATGCTAGAGAAGGCTTTCAAAGACTTTTGGTCCAGCAGGGAAGAAATTTGGG

>Bcin16g03460 (MLST7), partial sequence [organism=Botrytis calthae, strain MUCL2830]  
ATGAACCTCTTAATTTGAACTCTTCAATTAATTGCAAGTGATGAACCCCTATTTTGTCCAGAAGATAGTTACAAGACGTACATCATTAGTCGAGA  
ACCACCTCATGATATATATTGAAGGATTTTTGAAAGCAAATGAAAGTAAACATTTGGTTGATGTTAGGTATGTTATTTATTTCTGATGAGATGAAC  
AAGAGAAACTGATGAGATAGTGAGCCGCTTTATGAACCATCTACTGTTTCTCATGGACAGGAAGTTACCATTGATACTTCGGTTCCGAAATTCGG  
AAGTGGCGGTTTTAGAGAGGGATGAGGTGGTCAGGTGTATTGAGCATAGAGCGAGAGCATTTTCAGGGGTGGAGGGGGGAGATGGGGATTGAGAA  
GTTGAGGACGCAGAGGTATGGGGTTGGAGGACATTATGGGATGCACCTGTAAGTTTTGAGGGATTGACGAAGGCTTTTGTCTATTTTCTATCAA  
TACGGATCTTTAAAGAGAGATTTTATGAACACGTGGGCTAATGACCAGGAAAATAGTGATTGGAGCGGAGGCAAACGTGGCATAGACCGATTTCAG  
TACTTTTCATGGTCTATGTGACGATCTCTCTGATATCGAAGGTGGAGGAACGGAAATTTCCACGTATCGTGGGGCCAAAAGGAGGAAGGTGGGAG  
GAATTCCTGGATACTACCGAAGCATTAGATCCAAGAAGTGGAAAAAATGTAACAGTAGAAGGGGTGACATTCAAACCTATCAAGGGAAATGCCG  
TATTCTGGGAAAATACTGACAAGGACGGGAGGGGATATGAT

>Bcin12g03020 (MLST8), partial sequence [organism=Botrytis calthae, strain MUCL2830]  
CGATTGGCTGCGAAGAAAAGTGCAGCAGCCGAGCCACTAAAAGCACGAATAAACCATCGGCAAGAGAAAATATTTCTCTGAACCACAACATGACA  
CGAGCGCGAAGAATATATCGGGCGAGGTGCTTCAAGAGCACCAAAGCGACAACGAGTCGATGATAAATTACAACCTTACGGTGGAAAGAAA  
TGAAAATACAGCAGCTTATGCTTCCGGAAAAGCTTCCATCTGGAAAGTATAAATGTTGGTGGAGGTAGGAAGACCACCTTTTCAAGAAGAACCCTCGA  
ACGGCATTGTGCTGGCAAGTTGCCCCCTGGAAGTATCAACATCGGTGGAAAGAAAGGCTACCCAAATCGAGGACGAAGGAAGAGCAGCTTATG  
CTTCCGGGAAATTTGCCCCAGGAAGTATAAACTCTGGCGCAAAGAAGGCCATTTCAATCCAAGATGAAACGAGACCGGCTTATGCTCTCAGGAAA  
GCTCCACATGGTAATATTGATGGTATGCGAAACCGGAAAATGGCTGCCGTCCACCGCGAAAATGCTGAGGGTGGGAGGAAACCAGGTACAGGTT  
GTCTCTTCTCTATTTCACATTCAACTCTACTTCAAAGAAAACGTTTCGATGAACCCGAAAGCAAGCGGAGCCGGCAAACCATCCAATGCGCCTT  
TGACAGAGGAAAATGAAAACATTCACCAATCTAGGATTATCGAGAAGGCTTGCAGCCCATCTATCGACTAAACTCGATATGAAAGCTCCGACCGC  
CATTCAAAAGCATCTGTGACGAGTTGGTATCGGACGATAGCGATGCTTTCATACAAGCAGAGACTGGATCTGAAAAACCTTGGCATATCTA  
CTACCTATAGTCGAGCGGATATTAGCATTGAGTGAGAAATGGCGTACAAA

>Bcin02g07770 (MLST9), partial sequence [organism=Botrytis calthae, strain MUCL2830]  
CAGCTTTCCCTTTCCGCTTGGCATCTACAGTCATTGCCATCCCTACACCATCACAACCTTGAGTCTCGGGCCGTTATCAGCTCCGATGCCGTTG  
TAGGATTTGCCGAAGCTGTTCCAGTGGGACCGTAGGAACAGTTTATGAGGCATATAAACCATTCCTTAAAGTCGTAAATGGATGCGTACCATT  
CCCTGCCGTCGATGCATCGGGTAACACAGGGTATGTCTTATATCTTTCTCTTCCACACGATTTCTATTGAGTCTCTAACATATTTTAGTGGTG  
GTTTGTCAACCAACTGGCAGTAGCAATGGTGGTTGCAGCAGCAGTACCGGTCAAGTATATGTTTCGAGGAGGACAAAGCGGATCAAAGTACGCTAT  
CATGTAATCTGTTAAGTCTTTTCTAAACTTTTCTGTTATAGATCTAATCTAACAAAATCTCAGGTACATGCCAAAAGACGAGCCCTCAACCGGT  
ATTGGTCAACCGTACGATTGGGAAGGTGTAATTTGCTGGCTCTCCAGCGCCACCGCCACAACCTGCCGACAACATCTTAGCCGTTTGTCTTCCG  
CCCACGGAGGCTGGGATTGTTCCACCGATGGTTATTTCCCTTTCTGTTACCCGCCCTCTTATCAAGTACGAAAGTATCTGGCCCATCGATCATTC  
AATGGGTCTCACTAGTACTGTTGGTGGAAATCAACCTATGATTGCTTGGGAATCTTTAACTACTGCTGCTCAAACCTGCTCTTGAAGACACTGAT  
TTCGGTGTGCGAATGTTCCATTCATTCAGCTGCTTTCACTTCTAAT

>Bcin04g02090 (MLST10), partial sequence [organism=Botrytis calthae, strain MUCL2830]  
GGAGGATGATATGGCAAAGTCTATGATCACCAAAGCATTTGTGGGCATGAGTAGTAAACTCTCGAATATGACTATGAATGATGTTTACAAGCCC

TATATCCATGTAAGAAATGTAGAATGGAAGATCAATAACTGGAACATAATGTTGTTGTAGGCTTTCAAATTACTTACACAGTTCAACCCAATCA  
CTACAGCTATTGCCGAATCCCCTACTATTTCAAATGGCTGTCTCAGCAAATACCATCGAAAAGTACACACTGCTAGGTCCTTTCTTCAGAATATC  
TCCTTTGCAACAGGAAGTTACCAGGGAATACTTCAGTGCACCAAAGACGATAGATAGGGCAGCATATTGCCACATCTCAAGATGCGTTACGATTG  
ACCTTACAAAACCCATCAAAAAAGATTTACTTGTATATCATCAACCACTTTGTTCGAGCAAGTCCAATCGCCAAAAGCAAAACCTTGGATTGGTTCCG  
CCTACATCGTGAATCAAAATCACAAGCGCCGAGCACTTCAGGTAGACCCGAAAGAAGTATCTTCTGATGGTTTCATGCATAATGTCACCTGTCGT  
TCTGGATGGTCTCTGTGAGCCATTTCATGGATACCACATTTCTCGAAGATTTCAAAGATTGATATTGATTATTTAAGGCGTGCCTCGTGTAGAT  
ATCAAGGATGAGACCAAGTTGAACGCTGATGAGAAGGCTTCCGAGAAGTATTATGAGGACACTGTTCTCGGCACCTCTAATTTTCATCTCTGAGG  
TCTTCTTTCTGACATTGGCTGCTCATCATTTATGGTAGTGAAGCTCTTAATGCCACGCATAAGAGTCTGGAGAAAGACATCAAATATATTTCAAAA  
GCAATTGACTGCCGTTGAAGCA

>Bcin01g07220 (MLST1), partial sequence [organism=Botrytis cinerea, strain C12\_S\_E7\_02]  
CATAGTATCATAACCTTGTGGAAGCGATGTGATAAAATTCATGGATCCCAGCATCTTTTGCTGATGCAATAGCAGATGGAAGACTAGCACAAGGA  
GAAGATTCTGGGAGACCATAAATGATGTTATGGAGAATGGTAGCTGAAAATAGAATCGGTATTTGTGGAACGAGTGAGAGAGAAGCCCGGAGAG  
ACGGAATGTGACAGTTACTTATGGAGACGCGATTGAACGTCAACGGTGGAGGTGTTGAAGTATCTGGCGGATAGAGACCAATGAGCAGAGCAGC  
TATTGTAGATTTTCCGGAGCCGGAGGGTCCGACAAGTGCAGTTGTTGAGTTAGGAATCAGGGAAAGAGAAAAGGATGATATCGTTCGTTTTTTCA  
GGACGAGTAGGGTATGTGAATGAAAGACGGTTGAATTTGATTGGAAAGATTGTCGAAAGCCGTTCCGTTCTTTATTTTCGTGGGAGGAAGATG  
AATCGAGATTGGCTAATGCAAGCATATGCGTAGCTGTAACGCGAGAAGAGTTGATTTGTGGTATCATGGCCAGCATATTCGTACTATTAGAAAT  
ACCAATAATAGAAGATTGACAGTCTGTAGTGCAGTCCGATACTGATCTCTCTCTTGGTAAATGAGAACCCTGGCATAATAAAAAGATAGTTGCA  
GTGATGAAGAACGACATCGCATCTGTCAATCCCCACAGCAATCCCGAGTAGTTTGCCTCGTATTAGTCCAACCTTTATAAAGTTCTTCTGTAGCTT  
TGGTGTGTTTTGTCTCAAAGTAAGTTTCCAGAGTAAAAGCCCGAACCACTTTGATGTTGGAGAAAGTCTCTGAAAATATGCCAGTGGTCATTTTC  
AGAGGCGTAGTTGCACTTGTTTTCCATTTTCCACTCACGCGATTGAATGTTTTGGTACAGCGTATATAACTGGCCAGTTGCCATCGAGACT  
AATGTCAGTTTCCATGTATTACAAAAAGCCCAATGATTGATATCAATAGCATAGAAAATGCTGTGAATACAATACCAGCAAAGCGGCCAACGA  
GATTACGCATTTCTCAGAGTTCTATCCAAAACCTTCGTTCCAGCCGGCCAGGTGAATTCCTGGATTCCCTCAAACCATGACTTCGGTTGTGCGAG  
AATCTTCTTTAGTGCTTCTACACGCAGAGCACTAACCCAAGCTTGTCCAGCACGTTCCAAAGCATAATGCGAAAAGAAACAAGATATGCCATC

>Bcin05g07690 (MLST2), partial sequence [organism=Botrytis cinerea, strain C12\_S\_E7\_02]  
ACCCTATCACCAGTCCCTTTCTGCACTTTCCCTCATCAAAAACGAACGAGAACATCATCAATAAATACTTTGCTGAAGTAATGGGTTTTATT  
TTGGCCAGGATGCCTTCTCTCTACGACAGCAAGCCTTCGATGATATGTTGTGGGTAGTTCTTGGCTGGCTGGATACTGTCAAATTCATTGATTT  
ACATTCTGAATTCACATATTCAAACGACTCTCAGCCAGAATGGTACGGACAACAATATAAACCTGCATTTGCACATCGAGCGCGACTATTTTGG  
GAATTGGCTTCAACAAGGATGGGATACTACTCTCTGTGGTGGTGGGATGATATGGTACCATACTTACTCCATACAAGAATGCAATTACCAATG  
AACTCTATATCGCAGCTTCGATATCGATGTACCTATATTTCCCCGGAGATGACAATCAATCCCCATTTATGCTTTCCAACCTTCATATCCACC  
TCACGATCCGAAATATCTACAGGCAGCTGTTGATGCTTACAAATGGCTGAATGGTTCCAACATGACGGATTTACAAGGATTTATATGTCGACGGG  
TACCATATCTCGAATCTTTCTGGCGGTGAAAACACCCATTGCGATTCTAGAAAATGAGATGGTATATACCTACAATCAAGGTGTTTTGCTTACTG  
GACAACGTGGTTTTGTATGACGCAACCCGCGCAGATCATACCTTGTAGATGGCCACAAACTCATCGCAATGTTATTAATGCCACAGGCTATGA  
CCTGAAACACAATGTTGTATCTCACCGCCACCCAAAGATGGTTCGCATTTGGCAAAGTGGTTTTGGCTGGGTAGGAATGGAATACCTGGAAGAA  
GGATGCGATTCAAGTGCTTCGTGTTCTCAAATGGACAAACTTTCAAAGGCATATTTCTTTTCATCACTTGATTGCGTTCTGTAGTGATTTGCCAG  
GGGAGCCTATTGCGAGGACGAAGGAAAAGCTTAGAACTCGACAGAGTGTGGCATTTCTGACAAATGCTCACAGTATACAAAATG

>Bcin06g01710 (MLST3), partial sequence [organism=Botrytis cinerea, strain C12\_S\_E7\_02]  
GGTGAGTCTGACTTTTTTATTTGAGCATTAAGATAGACACTGATATAACCAAGGCAATCACCTAATTTTCATGGCGTTCTTCCCTGCATCATCTAC  
CTACCCTGGAATGCTGGGAGAATTATACTCAGCAGCTCTCACAGCACCTGCTTTCAATTGGATCTGTTCCCTGCTGTGACAGAATGGAGACG  
GTTGTAATGGATTGGCTGGCCAAGCTTCTCAATCTCCAGACTGTTATTTGTCTTCGACTCATGGTGGTGGTGTATCCAAGGATCAGCCTCGG  
AAGCTGTGCTTACCCTTATGGTTGCCGCCCGGATGATAAATATCTTCGTGAAACTACTGAAGGTCTGTGGGCATTGAACTTGAGAATGCGATTGC  
ATATAAGAGGAGTAAGCTAGTTGCACTAGGAAGCGAAAATGGCACACAGTTCACGCGAGAAAGCAGCGCAGATAGCTGGCGTTAGATTCCGATCG  
ATTCCAGTACTCGCATCCAATGATTTTGCCATGACGGGTGATGATTTAGAGAAGGTATTGAAAGAATGCAAATCTCAAGGATTGGAACCTTCT  
ATCTAACTTCGACTTTGGGAACAACATCTACATGCGCAGTTGACGACTTCGCATCTATTACAACAGTACTTTCAAATATGCACCTCCAGATGT  
TGCAGGCGAGATCTGGGTTACGTCGATGCTGCTTATGCAAGTGCAGCTTTGGTTTTGCCCTGAATACCATCATCTAACATCGTCTTCCAGCAT  
TTCCATTCCTTCGATATGAACATGCACAAAATGGCTTCTGACAAAATTTGACGCTTCTTGTCTATATGTCAAGAAACGCAAAGATCTGATCGATG  
CACTCTCCATAACGCCAAGTTATCTTCGCAACGAGTTTTCAGAGAGTGGACTCGTAACCGACTATCGGGACTGGCAAATTCCTCTCGGAAGACG  
CTTCCGAAGCTTAAAGATTTGGTTTGTCTCAGAACCTAC

>Bcin09g03030 (MLST4), partial sequence [organism=Botrytis cinerea, strain C12\_S\_E7\_02]  
ACCCTTCAACCCACCGCAGCTCTATACCGAAAGCGAGTATCTTACCAATTTCTCTTCCACCGCAGCTTTAAGACCATTGGCTTTCCGCACTT  
TCACAAAAAGCATAGTTTAAACATTGACGTCGTCGGCATTACAAGTGTGGCTACTTTTATTTGGAAAGTATTGTGGGACAGGATGGAGGGAAGA  
AGGACTGGCAGAGAGAGTCTTGGAGGAGGTCGCCAAGAGTTGGAAGAAATAGGAGTGGCGGTGTCATTGTGCGAGGGCGAGGGAACGGAATTGAAG  
GAGATTCTGAAAGCTTTGGAAGGGAATATGAGTGGTGGAAAGGATAGTCAATAGGAAGAGAGCTAAGCCGGCAGAAATAGTTTAGTACTGGGATCAT  
CACAATATGGAGAGGTCAATCATACAAGACTTGGGCTACGGCCAGGGAATATACCCAGAGAGGATAGTCAAGTTTGGGAATGTCAACGTT

```
GGAGGTCAATGACGAAGAAGATGAGGATGGCCCTGATGGATCCAAGAAGGTGGTTAAAAGTCATTGATGCATTTGAGCAACCTCGACTGGTGTAC
AATGTTGCTAAAAAGCACTTTGATAGGTATGTTTCAATGATAAAATTTTATCTGAATCGACTGACTCAGTACAGAGATGCCTCCAAACCTTCAT
TGTTCCACCTGCGTCTCATAAAACACTCCTCTTCCAAAACCGCTATAATGTTATCCATCAACGTCCTCTTCGCAATGAATCTTTTCAAACGCC
CGCTTTTCAAGGTGGCAAATCTTCCCTTCAACGCAGCAGTCCGCCATTACCACACAACAACAATCATACAAATTAACGCCGATAGCTAATCTT
CTCGGTGCAATCGCAGCTCTCATATGCTTCTCGGTCTCCTCAGTATTTACCCACTGGTACCTCGCCATCAATGACCTGACGGGCAGTATCG
CTCTCGATCTTACACACGCAGCAGCCATTC
```

```
>Bcin11g01310 (MLST5), partial sequence [organism=Botrytis cinerea, strain C12_S_E7_02]
ACTGACATGGACCTCATGTGGAACCGGCGTAGAATGCGCAACGCTTGAAGTTCCGCTCGAATATGGCGATGCAACGTCAACGGCAAAGCCAGT
GTTGCGCTTGCTCGTTATCTGCCACTGTTGCCGCGAGCAAGAAGCTCGGGTCTCTCTTGATAAAATCCCGGTGGACCCGGTGCCCTCGGTGTTG
GCTTTGTGCACTTGAGCCGGTGCCGCCGCTCGACACTGAGTGGTGGATTGTACGATATCATCGGATGGGATCCACGTGGAACCGGTGCTTC
GGCTCCTATTTTGAATGTTTTGCAAATGCCAGTGGGAGTATGATTTTAAACAACGCTTTCCATCTGCTCCGAATCTCTGGCTCGGACAATTT
GCGAATGCCAGCGCAAATCTGCTGTTAGCTCTGCTATCACATCCTTTGACACTTCTGTGCTGCTCTTGCAAAAAGCTTGCGTGGCTCAGAAAT
CTCCCGCTCTTTACACCTCAACAGCAGCATATGTTGCTCGAGACATGGCAGCGATAGTCGATGCATTGGATGGGACCTCTGCAAACTTAACTA
CTGGGGTTTCTCATATGGAACCTATCTTCCCTAGCTGAGTTTATCCAACTTTCCAGGCCGCGTGGGAAGAGTTCTTGCCGATGGTGTTCGCAC
GCAAAGGCAAATGCACTCACATACGTTAGCCAACCTCCCAACGATCAACTCAGTGTTCGTGCTTCGTTGAACGATTTTGCAGCTTTCTGCACCA
CCGCCGGTAGTAAAGGTTGCTCTTTTGCACCCGCCCTACTGGAACCTCAGGTAAGTGTGCTACCAGACTGGACAACATAATGAAGGATATGTT
CCTCAATCCTATTGTTGCTTCGGGCTTAAGCATCA
```

```
>Bcin15g03910 (MLST6), partial sequence [organism=Botrytis cinerea, strain C12_S_E7_02]
GCCAAAACACAAAATCATCCAACGATGAAGATGATACTCCACTTCCCTTGATTATCTGGCATGGACTCGGCGATAAATTACAAAGCGGATGGTCT
TGCGCAAGTTGGAAAAGTAGCTGAAGCCATTCATCTGGGACTTTTGTCTACAATATTCATGTAGATGAGGATGCATCTGCAGATAGGACAGCT
ACCTTCTTTGAAAATCTCACTCGTGAGTACATCCCTATTTTCTTTAAATATCATACTAACTCTCTTACCAAGTTCAAAATCGAAAAGGTCTG
CGAAGACCTCGCCTCCATCCTATTCTCTTACCAGCCCGCCGTCGACGCAATTGGATTCTCCAAGCGGCCAATTTCTTGCCTGGTTACATA
TCCCCTGCAATGCTCCACCCATCCGCTCTCTCTGACCTTCGGTTCCCAACACAACGGCATTCTGCTTCCAAGCCTGTGGTCCCGCCGACC
TCCTCTGTGCGGGTGTCAAACCCCTTTTGCAGTCCAAACACCTGGTCAACCTTTGTTCCAATCTCGTCTCGTACCCGCTCAATACTTCAGAGATCC
GGAAAACCTAGACTCTTACCTTGAATATTTCAATTTCTTGGCGACATCAATAATGAGCGGTTCTCAAGAACCAAACATATAAATCCAACATG
GAAAAATTGGAACGATTCGTAATGTATGCTTTGAAAGCAGATACAACCTGTCATCCCTAAGGAAAGTGGATGGTGGGCTGAAGTCAACGGCACGG
AAGTTACACCACTGAAAAGAAAGAGCCATTTATAAAAGAAAGATTGGCTAGGTTTAAAGACATTTGGATGAGGCCGGAAAATTAGTTTTCGAAACCAT
TCCAGGGGGACATATGACGTTAGGAGAGGAGATGCTAGAGAAGGCTTTCAAAGAGTATTTTGGTCCAGCAGGGAAGAAAATTTGGG
```

```
>Bcin16g03460 (MLST7), partial sequence [organism=Botrytis cinerea, strain C12_S_E7_02]
CATGAACCTCTTAATTTGAACTCTTCATTATTTGCAAGTGATGAACCCCTATTTCTGCCAGAGGATAGTTACAAGACGTATATCATTAGTTCGAG
AACCCTCATGATATATATTGACGGATTTTTGAAAGCGAATGAAAGTAAACATTTGGTTGATGTTAGGTGTGTTATTTATTTCTGATGAAATGAA
CAAGAGAGACTGATGAGATAGTGAACCGCTTATGAACCGTCTACTGTTTCTCACGGGCAGGAAGTTACCATTGATACTTCAGTTCGAAATTTCT
GAAGTGGCGGTTTTAGAGAGGGATGAGGTGGTCAAGTGTATTGAGCATAGAGCGAGGGCATTTCAGGGTGGAGGGGCGAGATGGGGATTGAGAA
GTTGAGGACGCAGAGGTATGGGGTTGGAGGACATTATGGGATGCATTTGTAAGTTTTGGGGGATTGACGAAGGCTTTTGTCTATTTTCTACCAG
TACGGATCTTGAAGAAAAGATAGCATGAACACGAGGGCTAATAACTAGGAAATAGCGACTGGAGCGGAGGTAAACGTGGCATAGACCGATTTAG
TACTTTTATGGTCTATGTCGACGTATCCTCTGATATCGAAGGTGGAGGAACGGAAATTTCCACGTATCGTGGGACCAAAGGAGGAAGGTGGGAG
GACTTCTTGGAAAATACGGAAGCATTTGGATCCAAGAATGGAGAAAAATGTAACAGTAGAAGGGGTGACATTCAAACCAATCAAGGGAAATGCCG
TATTCTGGGAAAATACTGACAACAACGGGAGGGCTATGAT
```

```
>Bcin12g03020 (MLST8), partial sequence [organism=Botrytis cinerea, strain C12_S_E7_02]
CGATTGGCTGCGAAGAAAAGTAGCGCAGCACCAGTCAACAAAAGCACGAATAAACCATCGGCAAGGGAAATATTTCTCTGAACCACAACATGACA
CGAGCGCGGAAGAGTATATCGGGCGAGAAGCTTCATCAAGAGCACCAAAGCGACAACGAGTCGATGATAATTATAACTCTTACGGTGGAAAGAAA
TGAAAATACAGCAGCTTATGCTTCCGGGAAACTTCCATCTGGAAGTATAAATGTTGGTGGAGGTAGGAAGACCACCTTTTCAAGAAGAACCACGA
ACGGCATTGTCGCTGGCAAGTTGCCCCCTGGAAGTATCAACATTTGGTGGAAAGAAAGGCTACCCAAATCGAGGACGAGGGTAGAGCAGCTTATG
CTTCCGGAAAATGCTCCAGGAAGTATAAATCTGCGCAAAAGAAAGGCGATTTCAATCCAAGATGAAACGAGACCCGGCTTATGCTCTCCGAAA
GCTTCCACATGGTAGTATCGACGGTATGCGAAAACCTGAAATGGCTGCCGTCCACCAGCAAAATGCTGAGGGTGGGAGGAAACCAGGCCAGGTT
GTCTCTTCTCTATTACATTTCAATCTACTTCAAAGAAAATTTTATGATGAACCCGAAGAACAAGCGGAACCGGCAAAACCATCCAATGCGCCTT
TGACAGAGGAAAATGGCGACTTTACCAATCTAGGGTTATCGAGAAGGCTTGCAGCCCATCTATCGACTAACTCGATATGAAAGCTCCGACCGC
CATTCAAAAGCATCTGTACAGCAGTTGGTATCGGACGATAGCGATGCTTTCATACAAGCAGAGACTGGATCTGGAAAACCTTTGGCATATCTA
CTACCTATAGTCGAGCGAATATTAGCATTGAGTGAGAAATGGCGTACAAA
```

```
>Bcin02g07770 (MLST9), partial sequence [organism=Botrytis cinerea, strain C12_S_E7_02]
CAGCTTTCCCTTTCCGGTCTTGGCATCTACAGTCATTGCCATCCCTACACCATCACAACCTGAGTCTCGGGCCGTTATCGATTCCGATGCCGTTG
TAGGATTTGCCGAAACTGTTCCAGTGGGACCGTAGGAACAGTTTATGAGGCATATAAACCATTCTTAAAGTCGTAAATGGATGCGTACCATT
```

```
CCCTGCCGTCGATGCATCGGGTAACACAGGGTATGTCCCTTATATCTTTCTCTTCCACACGATTGCTATTGAGTCTCTAACATATTTTAGTGGTG  
GTTTGTACCAACTGGCAGTAGCAATGGTGGTTGCAGCAGCAGTACCGGTCAAGTATATGTTTCGAGGAGGACAAAAGCGGATCAAACCTACGCCAT  
CATGTACTCCTGGTAAGTTCTCTCTAAACTTCTCCTTATAGATCCAACCTAACAAAAATCTTAGGTACATGCCAAAGGACGAGCCCTCAACCGGT  
ATTGGTACACCGTACAGATTGGGAAGGTGTAATTGTCTGGCTCTCCAGCGCCACCGCCACAACCTGCCGACAACATCTTAGCCGTTTGTCTTCCG  
CCCACGGAGGCTGGGATTGTTCACGGATGGCTATTCCCTTTCTGGTACCAGCCCTCTTATCAAGTACGAAAAGTATCTGGCCCGTCGATCACCTC  
AATGGGTCTTACTAGTACTGTTGGTGGAAAACAACCTATGATTGCTTGGGAGTCTTTACCAACTGCTGCTCAAACCTGCTCTTGAGAACACCGAT  
TTCGGTGTGCGAATGTTCCATTTCATTCGGCTGTTTTTCACAGACAATCT
```

```
>Bcin04g02090 (MLST10), partial sequence [organism=Botrytis cinerea, strain C12_S_E7_02]  
CGGAGGATGATATGGCAAAGTCTATGATTACCAAAGCATTTGTAGGCATGAGTAGTAAACTGTGCAATATGACTATGAATGATGTTTTACAAGCC  
CTACATCCATGTAAGAAAATGTAGAATAGAGAGATCAGTAACTGGAACATAATATCGTTTTGTAGGCTTTCAGTTACTTACGCAGTTCAACCCAA  
CACTACAGCTATTGCCGAATCCCCACTATTTCAAATGGCTGTCTCAGCAAATACCATCGAAAAGTACACACTGCTAGGCCCTTTCTTCAGAATA  
TCTCCTCTGCAACAGGAAGTTACCAGGGAATACTTCAGTGCGCCAAAGACGATAGATAGGCGACACATTGCCACATCTCAAGATGCCTTACGAT  
TGACCTTACAAAACCATCAAAAAAGATTTACTTGTATATCATCAACCCTTTGTTTCGAGCAAGTCCAATCGCCAAAAGCAAAACCTTGGATTGGTT  
CGCTACATTGTGAATCAAAAATCACAAGCGTCGAGCACTTCAGGTAGACCCGAAAGAGTGTCTTCTGATGGCTTTATGCACAATGTCACCTGTC  
GTTCTAGATGGTCTTTGTGAGCCATTCATGGATACCACATTCCTCGAAAATTTCAAGATTGATATTGATTATCTAAGACGTGCGCCTCGTGTAG  
ATATCAAGGACGAGACCAAGTTGAACGCTGACGAGAAGGCTTCTGAGAAGTATTATGAGGACACTGTTCCCTGGCACCTCTAATTTTCATCTCTGA  
GGTCTTCTTTCTCACATTGGCTGCTCATATTATGGTAGTGAAGCTCTAATGCCACGCATAAGAGTCTGGAGAAAAGACATCAAATATATTTCAA  
AAGCAATTGACTGCCGTTGAAGCA
```

```
>Bcin01g07220 (MLST1), partial sequence [organism=Botrytis cinerea, strain C12_S_E7_4]  
TGATGGCATATCTTGTCTTTCTTTTCGCATTATGCTTTGGAACGTGCTGGACAAGCTTGGGTTAGTGCTCTGCGTGTAGAAGCACTAAAGAAGATT  
CTCGCACAAACCGAAGTCATGGTTTTGAGGAATCCAGGAATTCACCTGGCCGGTTGAACGAAGTTTTGGATAGGAACCTGAGGAAATGCGTAATC  
TCGTTGGCCGCTTTGCTGGTATTGTATTCACAGCATTTTTTATGCTATTGATATCAATCATTTGGGCTTTTGTGAATACATGGAACTGACATT  
AGTCTCGATGGCAACTGGGCCAGTTATATACGCTGTCACCAAAAACATCCAATCGCGTGAGTGGAAAATGGGAAAACAAGTGCACACTACGCCCTC  
GAAATGACCCTGGCATATTTTTAGAGACTTTCTCCAACATCAAAGTGGTTTCGGGCTTTTACTCTGAAAACCTTACTTTGAGACAAAACACACCA  
AAGCTACAGAAGAACTTTATAAAGTTGGACTAATACGAGCAAACCTACTCGGGATTGCTGTGGGGATTGACAGATGCGATGTCATTCCTTCATCAC  
TGCAACTATCTTTTATATGCCACGGTCTCATTTACCAAGAGAGAGATCAGTATCGCGACTGCACTACAGACTGTCAATCTTCTATTTATTTGGT  
ATTTCTAATAGTACGAATATGCTGGCCATGATAACCACAAAATCAACTCTTCTCGCGTTACAGCTACGCATATGCTTGCATTAGCCAATCTCGATT  
CATCTTCTCCACGAAAATAAAGGAACCGAACGGCTTTTCGACAATCTTTCCAATCAAATTCACACCTTTTTCATTTCACATACCCCTACTCGTCC  
TGAAAACGAACGATATCATCTTTTCTCTTTCCCTGATTCTTAACCAACTGCACTTGTGCGACCCCTCCGGCTCCGGAAAATCTACAATA  
GTTGCTCTGCTCATTGGTCTCTATCCGCCAGATACTTCAACACCTCCACCGTTGACATTCAATCGCGTCTCCATAAGTAACTGTACATTTCCGT  
CTCTCCGGGCTTCTCTCTCACTCGTTCCACAAAATACCGATTCTATTTCCAGCTACCATTCTCCATAACATCATTTATGGTCTCCAGAAATCTTC  
TCCTTGTGCTAGTCTTCCATCAGCTATTGCATCAGCAAAAAGATGCTGGGATCCATGAATTTATCACATCGCTTCCACAAGGTTATGATACATAG
```

```
>Bcin05g07690 (MLST2), partial sequence [organism=Botrytis cinerea, strain C12_S_E7_4]  
CACCCTATCACCAAGTCCTTTTCTGCACTTTCTCATCAAAAACGAACGAGAACATCATCAATAAATACTTTGCTGAAGTAATTGGGTTTTTAT  
TTTGCCAGGATGCCTTCTCTACGACAGCAAGCCTTCGATGATATGTTGTGGTAGTTCTTGGCTGGCTGGATACTGTCAAATTCATTGATT  
TACATTCGAATTGCACTATTCAAACGACTCTCAGCCAGAATGGTACGGACAACAATAAAACCTGCATTTGCACATCGAGCGGACTATTTTG  
GGAATTGGCTTACAAGGATGGGATACTACTCTCTGTGGTGGTGGGATGATATGGTACCATAACCTTACTCCATACAAGAACGCAATTACCAAT  
GAACTCTATATCGCAGCTTCGATATCGATGTACCTATATTTCCCGGAGATGACAAATCAATCCCCATTTATGCTTTCCAACCCCTTCATATCCAC  
CTCACGATCCGAAAATCTACAGGCAGCTGTTGATGCTTACAAAATGGCTGAATGGTTCCAACATGACGGATTTACAAGGATTATATGTCGACGG  
GTACCATATCTCGAATCTTTCTGGCGGTGAAAACACCCATTGCGATTCTAGAAAATGAGATGGTATATACCTACAATCAAGGTGTTTTGCTTACT  
GGACAACGTGGTTTTGTATGACGCAACCGCCGACGATCATACCTTGTAGATGGCCACAACCTCATCGCAATGTTATTAATGCCACAGGCTATG  
ACCTGAAAACACAATGTTGTCATCTCACCGCCACCCAAAAGATGGTTCCGCATTTGGCAAAGTGGTTTTGGCTGGGTAGGAATGGAATACGGAAGA  
AGGATGCGATTCAAGTGTCTCGTGTCTCAAAAATGGACAACTTTCAAAGGCATATCTTTTCATCACTTGATTGCGTTCTGTAGTGATTTGCCA  
GGGGAGCCTATTGCAGGGACGAAGGAAAAGCTTAGAACTCGACAGAGTGTGGCATTTGACAAAATGCTCACAGTATACAAAAAT
```

```
>Bcin06g01710 (MLST3), partial sequence [organism=Botrytis cinerea, strain C12_S_E7_4]  
GTGAGTCTGACTTTTGTATTTGAGCGTTAAGATAGACACTGATATACCAAGGCAATCACCTAATTTTCATGGCGTTCTTCCCTGCATCATCTACC  
TACCCTGGAATGCTGGGAGAATTATACTCAGCAGCTTTTCACAGCACCTGCTTTCAATTTGGATCTGTTCCCTGCTGTGACAGAATTTGGAGACGG  
TTGTAATGGATTGGCTGGCCAAGCTTCTCAATCTCCAGACTGTTATTTGTCTTCGACTCATGGTGGTGGTGTATCCAAGGATCAGCCTCGGA  
AGCTATCGTTACCGTTATGGTTGCTGCCCGGATAAAATATCTTCGTGAACTACTGAAGTCTGTGCGGCATTGAACTCGAGGATGCGATTGCA  
TATAAGAGGAGTAAGCTAGTTGCACTAGGAAGCGAAAATGGCACACAGCTCCACGCGAAAAGCAGCGCAAATAGCTGGCGTTAGATTCCGATCGA  
TTCCAGTACTCGCATCCAATGATTTTCGCCATGACGGGTGATGATTTAGAGAAGGTATTGAAAAGAAATGCAAATCTCAAGGATTGGAACCCCTCTA  
TCTAACTTCGACTTTGGGAACAACATCTACATGCGCAGTTGACGACTTCGCATCTATTTGCAACAGTACTTTCAAATAATGCACCTCCAGATGTT  
GCAGGCGAGATCTGGGTTACGTCGATGCTGCTTATGCAGGTGCAGCTTTGGTTTTGCCCTGAATACCATCATCTAACATCGTCTTTCCAGCAT
```

```
TCCATTCCCTTCGATATGAACATGCACAAATGGCTTCTGACAAATTTGACGCTTCTTGTCTATATGTCAAGAAACGCAAAGATCTGATCGATGC
ACTGTCCATAACACCAAGTTATCTTCGCAACGAGTTTTTCAGAGAGTGGACTCGTAACCGACTATCGGGACTGGCAAATTCCTCTCGGAAGACGC
TTCCGAAGCTTAAAGATTTGGTTTTGTCTCAGAACCTACG
```

```
>Bcin09g03030 (MLST4), partial sequence [organism=Botrytis cinerea, strain C12_S_E7_4]
ACCCTTCAACCCACCGCAGCTCCTATACCGAAAGCGAGTATCTACCAATTTCTCTTCCACCTGCGACTTTAAGACCATTGGCTTTCCGCACT
TTCACAAAAAAGCATAGTTTAAACATTGACGTCGTCGGCATTACAAGTGTGGCTACTTTTTATTGGAAAGCATTGTGGGACAGGATGGAGGGAAG
AAGGACTGGCAGAGAGAGTCTTGGAGGAGGTCGCCAAGAGTTGGAAGAATAGGAGTGGCGGTGTCAATTGTTCGAGGGCGAGGGAACGGAATTGAA
GGAGATTCTGAAAGCTTTGGAAGGGAATATGAGTGGTGAAGGATAGTCATAGGAAGAGAGCTAAGCCGGCAGAATAGTTTAGTACTGGGATCA
TCACAATATGGAGAGGTCAATCATACAAGACTTGGGCTACGGCCAGGGAATATACCCAGAGAGGATAGTCAGTCAAGTTTGGGAATGTCAACGT
TGGAGGTCAATGACGAGGAAGATGAGGATGGCCTGATGGATCCAAGAAGGTGGTTAAAAGTCATTGATGCATTTGAGCAACCTCGACTGGTGTGA
CAATGTTGCTAAAAAGCACTTTGATAGGTATGTTTCAATGATAAAAATTTCACTCTGAATCGACTAACTCAGTACAGAGATACCTCCAAACCTTCA
TTGTTCCACCTGCGTCTCATAAAACACTCCTCTTCCAAAACCGCTATAATGTTATCCATCAACGTCTCCTTCGCAATGAATCTTTTTCAAACGC
CCGCTTTTCAAGGTGGCAAATCTTCCCTTCAACGCAGCAGCTCCGCCATTACCACCCAACAACAATCATACAAATTAACGCCGATAGCTAATCT
TCTCGGTGCGCAATCGCAGCTCTCATATGCTTCTCGGTCTCCTCAGTATTTACCCCACTGGTACCCTCGCCATCAATGACCTGACGGGCAGTATC
GCTCTCGATCTTACACACGCAGCAGCCATTC
```

```
>Bcin11g01310 (MLST5), partial sequence [organism=Botrytis cinerea, strain C12_S_E7_4]
ACTGACATGGACCTCATGTGGAACCGGCTAGAAATGCGCAACGCTTGAAGTTCCGCTCGAATATGGCGATGCAACGTCAACGGCAAAGCCAGT
GTTGCGCTTGCTCGTTATCTGCCACTGTTGCCGCGAGCAAGAAGCTCGGGTCTCTCTTGATAAACCCCGGTGGACCCGGTGCCTCTGGTGTG
GCTTTGTGAGTCTGGAGCCGGTGCCCGCTCTCGACACTGAGTGGTGGATTGTACGATATCATCGGATGGATCCACGTGGAACCCGGTGCCTTCG
GCTCCTATTTTGAATGTTTTGCAAAATGCCAGTGCAGGATGATGATTTTAAACAACGCGTTTTCCATCTGCTCCGAATCTCTGGCTCGGACAATTTG
CGAATGCCAGCGCAAATTTCTGCTGTTAGCTCTGCTATCACATCCTTTGACACTTCTGTGCTGCTCTTGCAAAAGCTTGCCTGGCTCAGAAATC
TCCCCTCTTTACACCTCAACAGCAGCATATGTTGCTCGAGACATGGCAGCGATAGTCGATGCATTGGATGGGACCTCTGCAAAACTTAACTAC
TGGGGTTTTCTCATATGGAATATTTTCTAGCTGAGTTTATCCAAACTTTCCAGGCCGTGTGGGAAGAGTTCTTGCCGATGGTGTTCGACG
CAAAGGCAAATGCACTCACATACGTTAGCCAACTTTCCAAACGATCAACTCAGTGTTCGTGCTTCGTTGACGATTTTGCAGCTTTCTGCACCACC
GCCGGTAGTAAAGGTTGCTCTTTTGGCACCGCCCTACTGGAACCTCAGTACTGTTGCTACCAGACTGGACAACATAATGAAGGATATGTTCC
TCAATCCTATTTGTTGCTTCGGGCTTAAGCATCA
```

```
>Bcin15g03910 (MLST6), partial sequence [organism=Botrytis cinerea, strain C12_S_E7_4]
GCCAAAACACAAAATCATCCAACGATGAAGATGATACTCCACTTCCCTTGATTATCTGGCATGGACTCGGCGATAAATTACAAAGCGGATGGTCT
TGCGCAAGTTGGAAAAGTAGCTGAAGCTATTCATCTGGGACTTTTTGTCTACAATATTCATGTAGATGAGGATGCATCTGCAGATAGGACAGCT
ACCTTCTTTGGAAAATCTCACTCGTGAGTACATCCCTATTTTTTCCCTTTAAATATCATACTAACTCTCTTACCAAGTTCAAATCGAAAAGGCTCG
CGAAGACCTCGCCTCCCATCCTATTTCTCTTACCAGCGCCCGCGTTCGACGCAATTGGATTCTCCCAAGGCGGCCAATTTCTTGCCTGGTTACATA
TCCCCTGCAATGCTCCACCCATCCGCTCTCTCTGACCTTCGGTTCCCAACACAACGGCATTCTGCTTCCAAGCCTGTGGTCCGCGATT
TCCTCTGTGCGGGTGTCAAACCTTTTGGCATCCAACACCTGGTCAACCTTTGTCCAATCTCGTCTCGTACCCGCTCAATACTTCAGAGATCC
GGAAAACCTAGACTCTTACCTTGAATATTTCCAATTTCTTGGCGACATCAATAATGAGCGGCTTCTCAAGAACCACAAATATAAATCCAACATG
GAAAAATTGGAACGATTCGTAATGTATGCTTTGAAGACGATACAACCTGTCATCCCTAAGGAAAGTGGATGGTGGGCTGAAGTCAACGGCACGG
AAGTTACACCACTGAAAGAAAGAGCCATTTATAAAGAAGATTGGCTAGGTTTAAAGACATTTGGATGAGGCCGAAAATTAGTTTTCGAAACCAT
TCCAGGGGGACATATGACGTTAGGAGAGGAGATGCTAGAGAAGGCTTTCAAAGAGTATTTTGGTCCAGCAGGGAAGAAATTTGGG
```

```
>Bcin16g03460 (MLST7), partial sequence [organism=Botrytis cinerea, strain C12_S_E7_4]
ATGAACCTCTTGATTTGAACTCTTCATTAATTTGCAAGTGTATGAACCCCTATTCTGCCAGAGGATAGTTACAAGACGTATATCATTTAGTCGAGA
ACCACCTCATGATATATATTGACGGATTTTTTGAAGCGAATGAAAGTAAACATTTGGTTGATGTTAGGTGTGTTATTTATTTCTGATGAAATGAAC
AAGAGAGACTGATGAGATAGTGAGCCGCTTTATGAACCGTCAACTGTTTCTCACGACAGGAAGTTACCATTGATCCTTCAGTTCCGAATTTCTG
AAGTGGCGGTTTTAGAGAGGGATGAGGTGGTCAAGGTGATTTGAGCATAGAGCGAGGGCATTTCAGGGGTGGAGGGGCGAGATGGGGATTGAGAA
GTTGAGGACGCAGAGGTATGGGGTTGGAGGACATTTATGGGATGCATTTGTAAGTTTTGGGGGATTGACGAAGGCTTCTGTCTATTTTCTATCAG
CACGGATCTTGAAGAAAAGATAGCATGAACACCGGGCTAATAACTAGGAAATAGCGATTGGAGCGGAGGTAACCTGGCATAGACCGATTTAG
TACTTTTCAATGGTCTATGTGACGATATCCTCTGATATCGAAGTGGAGGAACGGAATTTCCACGTATCGTGGGACAAAAGGAGGAAGGTGGGAG
GACTTCTGAAACTACGGAAGCATTTGGATCCAAGAATGGAGAAAATGTAACAGTAGAAGGGGTGACATTCAAACCAATCAAGGGAAATGCCG
TATTCTGGGAAAATACTGACAACAACGGGAGGGGCTATGAT
```

```
>Bcin12g03020 (MLST8), partial sequence [organism=Botrytis cinerea, strain C12_S_E7_4]
TCGATTGGCTGCGAAGAAAAGTGCAGCAGCACCAGTCAACAAAAGCACGAATAAACCATCGGCAAGGGAAATATTTCTGTAACCACAACATGAC
ACGAGCGCGGAAGAGTATATCGGGCGAGAAGCTTCATCAAGAGCACCAAAGCGACAACGAGTTCGATGATAATTTATAACTCTTACGGTGGAAAGAA
ATGAAAATACAGCAGCTTATGCTTCCGGGAAACTTCCATCTGGAAGTATAAATGTTGGTGGAGGTAGGAAGACCACTTTTCAAGAAGAACCAG
AACGGCATTGTGCTGGCAAGTTGCCCTTGAAGTATCAACATTTGGTGGAAAAGAAGGCTACCCAAATCGAGGACGAGGGTAGAGCAGCTTAT
```

```
GCTTCCGGAAAATTGCCTCCAGGAAGTATAAACTCTGGCGCAAAGAAGGCGATTTCATTCCAAGATGAAACGAGACCGGCTTATGTCTCCGGAA
AGCTTCCACATGGTAGTATCGACGGTATGCGAAACCGTGAAATGGCTGCCGTCCACCGCGAAAATTGCTGAGGGTGGGAGGAAACCAGGCCAGGT
TGCTCTTCTCTATTACATTCATCCTACTTCAAAGAAAACCTTTTGTATGAACCCGAAAGAACAGCGGAACCGGCAAAACCATCCAATGCGCCT
TTGACAGAGGAAAATGGCGACTTTCACCAATCTAGGGTTATCGAGAAGGCTTGCAGCCCATCTATCGACTAAACTCGATATGAAAGCTCCGACCG
CCATTCAAAAAGCATCTGTACAGCAGTTGGTATCGGACGATAGCGATGCTTTCATACAAGCAGAGACTGGATCTGGAAAAACCTTTGGCATATCT
ACTACCTATAGTCGAGCGAATATTAGCATTGAGTGAGAATGGCGTACAAA
```

```
>Bcin02g07770 (MLST9), partial sequence [organism=Botrytis cinerea, strain C12_S_E7_4]
CAGCTTTCCTTTTCGGTCTTGGCATCTACAGTCATTGCCATCCCTACACCATCACAACCTTGAGTCTCGGGCCGTTATCGATTCCGATGCCGTTG
TAGGATTTGCCGAAACTGTTCCAGTGGGACCGTAGGAACAGTTTATGAGGCATATAAACCATTCCTTAAAGTCGTAAATGGATGCGTACCATT
CCCTGCCGTGCATGCATCGGGTAACACAGGGTATGTCTTATATCTTTCTCTTCCACACGATTGCTATTGAGTCTCTAACATATTTTAGTGGTG
GTTTGTCAACCAACTGGCAGTAGCAATGGTGGTTGCAGCAGCAGTACCGGTCAAGTATATGTTTCGAGGAGGACAAAGCGGATCAAACCTACGCCAT
CATGTACTCCTGGTAAGTTCTCTCTAAACTTCTCCTTATAGATCCAACCTAACAAAATCTTAGGTACATGCCAAAGGACGAGCCCTCAACCGGT
ATTGGTCAACCGTACGATTGGGAAGGTGTAATTTGTCTGGCTCTCCAGCGCCACCGCCACAACCTGCCGACAACATCTTAGCCGTTTGTCTTCCG
CCCACGGAGGCTGGGATTGTTCCACGGATGGCTATTCCCTTTCTGGTACCAGCCCTCTTATCAAGTACGAAAGTATCTGGCCCGTCGATCACTC
AATGGGTCTTACTAGTACTGTTGGTGAAAAACAACCTATGATTGCTTGGGAGTCTTTACCAACTGCTGCTCAAACCTGCTCTTGAGAACACCGAT
TTCGGTGTGCGAATGTTCCATTCATTCCGGCTGTTTTACAGACAATCT
```

```
>Bcin04g02090 (MLST10), partial sequence [organism=Botrytis cinerea, strain C12_S_E7_4]
GCGGAGGATGATATGGCAAAGTCTATGATTACCAAAGCATTTGTAGGCATGAGTAGTAACTGTGCAATATGACTATGAATGATGTTTACAAGC
CCTACATCCATGTAAGAAATGTAGAATAGAGAGATCAGTAACTGGAACATAATATCGTTTGTAGGCTTTCAAGTTACTTACGCAGTTCAACCCAA
TCACTACAGCTATTGCCGAATCCCCACTGTTTCAAATGGCCGTCTCAGCAAATACCATCGAAAAGTACACACTGCTAGGCCCTTTCTTTCAGAAT
ATCTCCTCTGCAACAGGAAGTTACCAGGAATACTTTCAGTGCGCCAAAGACGATAGATAGGCGACACATTGCCACATCTCAAGATGCGTTACGA
TTGACCTTACAAACCCATCAAAAAGATTTACTTGATATCATCAACCACTTTGTTTCGAGCAAGTCCAATCGCAAAAAGCAAAACCCCTGGATTGGT
TCGCCTACATTTGTAATCAAAAATCACAAGCGTCGAGCACTTCAGGTAGACCCGAAAAGAGTGTCTTCTGATGGCTTTATGCACAATGTCACCTGT
CGTTCTAGATGGTCTTTGTGAGCCATTCATGGATACCACATTTCTCGAAAATTTTCGAAGATTGATATTGATTATCTAAGACGTGCGCCTCGTGTA
GATATCAAGGACGAGACCAAGTTGAACGCTGACGAGAAGGCTTCTGAGAAGTATTTATGAGGACACTGTTCTTGGCCTTCTAATTTTCATCTCTG
AGGTCTTCTTCTCACATTTGGCTGCTCATCATTTATGGTAGTGAAGCTCTTAATGCCACGCATAAGAGTCTGGAGAAAGACATCAAATATATTTCA
AAAGCAATTGACTGCCGTTGAAGCAG
```

```
>Bcin01g07220 (MLST1), partial sequence [organism=Botrytis cinerea, strain CH14_ES_11_1]
ATGGCATATCTTGTCTTTTTCGCATTATGCTTTGGAACGTGCTGGACAAGCTTGGGTTAGTGCTCTGCGTGTAGAAGCACTAAAGAAGATTCT
CGCACAACCGAAGCCATGGTTTGGAGAAATCCAGGAATTCACCTAGCCGGTTGAACGAAAGTTTTGGATAGGAACTCTGAGGAAATGCGTAATCTC
GTTGGCCGCTTTGCTGGTATTGTATTACAGCATTTTTTTATGCTATTGATATCAATCATTCGGGCTTTTCGTGAATACATGGAAACTGACATTAG
TCTCAATGGCAACTGGCCAGTTATATACGCTGTCACCAAAACGTTCAATCGCGTGAGTGAAAAATGGGAAAACAAGTGAACCTACGCATCTGA
AATGACCACTGGCATATTTTTCAGAGACTTTCTCCAACATCAAAGTGGTTTCGGGCTTTTACTCTGGAACTTACTTTAAGACAAAACACACCCAAA
GCTACAGAAGAACTCTATAAAGTTGGACTAATACGAGCAAACCTACTCGGGATTGCTGTGGGGATTGACAGATGCAATGTCATTTCTTCATCACTG
CAACTATCTTTTATTATGCCACGGTTCTCATTACCAAGAGAGAGATCAGTATCGCGGCTGCACTACAGACTGTCAATCTTCTATTATTTGGTAT
TTCTAATAGTACGAATATGCTGGCCATGATACCACAAAATCAACTCTCCTCGCGTTACAGCTACGCATATGCTTGCATTAGCCAATCTCGATTCA
TCTTCTCCACGAAAAATAAAGGAACCGAACGGCTTTTCGACAATCTTTCCAATCAAATTCACCCGCTTTTCATTACATACCCCTACTCGTCTTG
AAAAACGAACGATATCATCTTTTCTCTTTCCCTGATTCCCTAACTCAACAACTGCACTTGTTCGGACCCCTCCGGCTCCGAAAAATCTACAATAGC
TGCTCTGCTCATTGGTCTCTATCCGCCAGATACTTCAACACCTCCACCGTTGACATTCAATCGCGTCTCCATAAGTAACTGTACATTTCCGCTCT
CTCCGGGCTTCTCTCTCACTCGTTCCACAAAATACCGATTCTATTTCCAGTACCATTCTCCATAACATCATTTTATGGTCTCCAGAAATCTTCTC
CTTGTGCTAGTCTTCCATCTGCTATTGCATCGACAAAAGATGCTGGGATCCATGAATTTATCACATCGCTTCCACAAGGTTATGATACTAT
```

```
>Bcin05g07690 (MLST2), partial sequence [organism=Botrytis cinerea, strain CH14_ES_11_1]
ACCACTATCACCAAGTCTTTTCTGCACTTTCTCATCAAAAACGAACGAGAACATCATCAATAAATACTTTGCTGAAGTAATGGGTTTTATT
TTGGCCAGGATGCCTTCTCTCTACGACAGCAAGCCTTCGATGATATGTTGTGGGTAGTTCTTGGCTGGCTGGATACTGTCAAATTCATTGATTT
ACATTCTGAATTGCACTATTCAAACGACTCTCAGCCAGAATGGTACGGACAACAATATAAACCTGCATTTGCACATCGAGCGGACTATTTTGG
GAATTGGCTTCAAAAGGATGGGATACTACTCTCTGTGGTGGTGGGATGATATGGTCACCATACTTACTCCATAACAAGAACGCAATTTACCAATG
AACTCTATATCGCAGCTTCGATATCGATGTACCTATATTTCCCCGGAGATGACAATCAATCCCCATTTATGCTTTCCAACCCCTTCATATCCACC
TCACGATCCGAAATATCTACAGGCAGCTGTTGATGCTTACAAAATGGCTGAATGGTTCCAACATGACGGATTTACAAGGATTATATGTCGACGGG
TACCATATCTCGAATCTTTCTGGCGGTGAAAACACCCATTTGCATTTCTAGAAAATGAGATGGTATATACCTACAATCAAGGTGTTTTGCTTACTG
GACAACGTGGTTTTGATGACGCAACCGCCGACGATCATACCTTGTAGATGGCCACAAAATCATCGCGAATGTTATTAATGCCACAGGCTATGA
CCTGAAAACACAATGTTGTCTATCTACCGCCACCCAAAAGATGGTTCCGCATTTGGCAAAGTGGTTTGGCTGGGTAGGAATGGAATACCTGGAAGAA
GGATGCGATTCAAGTCTTCTGTTCTCAAATGGACAAAACCTTCAAAGGCATATCTTTTCATCACTTGAATGCGTCTCTGTAGTGAATTTGCCAG
GGGAGCCTATTGCAAGGACGAAGGAAAGCTTAGAACTCGACAGAGTGTGGCATTCTGACAAAATGCTCACAGTATACAAAAT
```

>Bcin06g01710 (MLST3), partial sequence [organism=Botrytis cinerea, strain CH14\_ES\_11\_1]  
CATTGGTGAGTCTGACTTTTGTATTTGAGCGTTAAGATAGACTGATATACCAAGGCAATCACCTAATTTTCATGGCGTTCTTCCCTGCATCAT  
CTACCTACCCTGGAATGCTGGGAGAATTATACTCAGCAGCTTTCACAGCACCTGCTTTCAATTGGATCTGTTCCCTGCTGTGACAGAATTGGA  
GACGGTTGTAATGGATTGGCTGGCCAAGCTTCTCAATCTCCAGACTGTTATTTGTCTTCGACTCATGGTGGTGGTGTGCATCCAAGGATCAGCC  
TCGGAAGCTATCGTTACCGTTATGGTTGCTGCCCGGATAAAATATCTTCGTGAAACTACTGAAGGTCTGTGGGCATTGAACTCGAGGATGCGA  
TTGCATATAAGAGGAGTAAGCTAGTTGCACTAGGAAGCGAAAATGGCACACAGCTCCACGCAGAAAAGCAGCGCAAATAGCTGGCGTTAGATTCGG  
ATCGATTCCAGTACTCGCATCCAATGATTTTCGCCATGACGGGTGATGATTTAGAGAAGGTATTGAAAGAATGCAAATCTCAAGGATTGGAACCC  
TTCTATCTAACTTCGACTTTGGGAACAACATCTACATGCGCAGTTGACGACTTCGCATCTATTGCAACAGTACTTTCAAAAATATGCACCTCCAG  
ATGTTGACGGCGAGATCTGGGTTACGTCGATGCTGCTTATGCAAGTGCAGCTTTGGTTTTGCCCTGAATACCATCATCTAACATCGTCCTTCCA  
GCATTTCCATTCCCTTCGATATGAACATGCACAAAATGGCTTCTGACAAAATTTTCGACGCTTCTTGTCTATATGTCAAGAAAACGCAAAGATCTGATC  
GATGCACTCTCCATAACACCAAGTTATCTTCGCAACGAGTTTTTCAGAGAGTGGACTCGTAACCGACTATCGGGACTGGCAAATTCCTCTCGGAA  
GACGCTTCCGAAGCTTAAAGATTTGGTTTGTCTCAGAACCTAC

>Bcin09g03030 (MLST4), partial sequence [organism=Botrytis cinerea, strain CH14\_ES\_11\_1]  
ACGACCCTTCAACCCACCGCAGCTCCTATACCGAAAGCGAGTATCCTACCAATTCCTTCCACCTGCGACTTTAAGACCATTGGCTTTCCGC  
ACTTTCACAAAAAGCATAGTTAACATTGACGTCGTCGGCATTACAAGTGTGGTACTTTTATTGGAAAGCATTGTGGGACAGGATGGAGGG  
AAGAAGGACTGGCAGAGAGAGTCTTGGAGGAGGTCGCCAAGAGTTGGAAGAAATAGGAGTGGCGGTGTCATTGTGCGAGGGCGAGGAAACGGAATT  
GAAGGAGATTCTGAAAAGCTTTGGAAGGGAATATGAGTGGTGGAAAGGATAGTCATAGGAAGAGAGCTAAGCCGGCAGAATAGTTTAGTACTGGGA  
TCATCACAATATGGAGAGGTCAATCATACAAGACTTGGGCTACGGCCAGGGAATATACCCAGAGAGGATAGTCAGTCAAGTTTGGGAATGTCAA  
CGTTGGAGGTCAATGACGAGGAAGATGAGGATGGCTGATGGATCCAAGAAGGTGGTTAAAAGTCAATTGATGCATTTGAGCAACCTCGACTGGT  
GTACAATGTTGCTAAAAAGCACTTTGATAGGTATGTTTCAATGATAAAAATTTTATCTGAAATCGACTAACTCAGTACAGAGATACCTCCAAACCT  
TCATTGTTCCACCTGCGTCTCATAAAAACACTCCTCTTCCAAAACCGCTATAATGTTATCCATCAACGTCTCCTTCGCAATGAATCTTTTCAA  
CGCCCGCTTTTCAAGGTGGCAAATCTTCCCTTCAACGCAGCACGTCGCCATTACCACCCAACAACAATCATACAAAATTAACGCCGATAGCTAA  
TCTTCTCGGTTCGCAATCGCAGCTCTCATATGCTTCTCGGTCTCCTCAGTATTTTACCCACTGGTACCCTCGCCATCAATGACCTGACGGGCAGT  
ATCGCTCTCGATCTTACACACGCAGCAGCCATTCC

>Bcin11g01310 (MLST5), partial sequence [organism=Botrytis cinerea, strain CH14\_ES\_11\_1]  
ACTGACATGGACCTCATGTGGAACCGCGTAGAATGCGCAACGCTTGAAGTTCGCTCGAATATGGCGATGCAACGTCAACGGCAAAGCCAGT  
GTTGCGCTTGCTCGTTATCCTGCCACTGTTGCCGCGAGCAAGAAGCTCGGGTCTCTCTTGATAAAATCCCGGTGGACCCGGTGCCTCTGGTGTG  
GCTTTGTGACGCTTGAGCCGGTGCCGCGTCTCGACACTGAGTGGTGGATTGTACGATATCATCGGATGGGATCCACGTGGAACCGGTGCTTC  
GGCTCCTATTTTGGAAATGTTTTGCAAATGCCAGTGCAGGATGATTTTTAACACCGGTTTCCATCTGCTCCGAATCTCTGGCTCGGACAATTT  
GCGAATGCCAGCGCAAATTTCTGCTGTTAGCTCTGCTATCACATCCTTTGACACTTCTGTGCTGCTCTTGCAAAAGCTTGGCTGGCTCAGAAAT  
CTCCCGCTCTTTACACCTCAACAGCAGCATATGTTGCTCGAGACATGGCAGCGATAGTCGATGCATTGGATGGGACCTCTGCAAAACTTAACTA  
CTGGGGTTTCTCATATGGAATATTTTCTTAGCTGAGTTTATCCAACTTTCCAGCCGCGTGGGAAGAGTCTTGGCCGATGGTGTTCGAC  
GCAAAGGCAAATGCACTCACATACGTTAGCCAATTTCCCAACGATCAACTCAGTGTTCGTGCTTCGTTGAACGATTTTGCAGCTTTCTGCACCA  
CCGCCGGTAGTAAAGGTTGCTCTTTTGGCACC GCCCTACTGGAACCACAGGTAAGTGTGCTACCAGACTGGACAACATAATGAAGGATATGTT  
CCTCAATCCTATTGTTGCTTCGGGCTTAAGCATCA

>Bcin15g03910 (MLST6), partial sequence [organism=Botrytis cinerea, strain CH14\_ES\_11\_1]  
GCCAAAACACAAAATCATCCAACGATGAAGATGATACTCCACTTCCCTTGATTATCTGGCATGGACTCGGCGATAATTACAAAGCGGATGGTCT  
TGCGCAAGTTGGA AAACTAGCTGAAGCTATTCATCTGGGACTTTTGTCTACAATATTCATGTAGATGAGGATGCATCTGCAGATAGGACAGCT  
ACCTTCTTTGAAAATCTCACTCGTGAGTACATCCCTATTTTTCTTTAAATATCATACTAACTCTCTTACCAAGTTCAAATCGAAAAGGTCTG  
CGAAGACCTCGCCTCCCATCCTATTCTCTTACC GCGCCCGCTCGACGCAATTTGGATTCTCCCAAGGCGGCCAATTTCTTGCCTGGTTACATA  
TCCCCTGCAATGCTCCACCCATCCGCTCTCTCTGACCTTTGGTTCCCAACACAACGGCATTTCTGCCTTCCAAGCCTGTGGTCTGCCGATT  
TCCTCTGTGCGGGTGTCAAACCTTTTGCATCCAACACCTGGTCAACCTTTGTCCAATCTCGTCTCGTACCCGCTCAATACTTTCAGAGATCC  
GGAAAACCTAGACTCTTACCTTGAATATTTCAATTTCTTGGCGACATCAATAATGAGCGGTTCTCAAGAACCAAACATATAAAATCCAACATG  
GAAAAATTGGAACGATTTCGTAATGTATGCTTTGAAAGACGACACAACCTGTCAATTCCTAAGGAAAGTGGATGGTGGGCTGAAGTCAACGGCACGG  
AAGTTACACCACTGAAAGAAAGAGCCATTTATAAAGAAGATTGGCTAGGTTTAAAGACATTGGATGAGGCCGAAAATTAGTTTTTCGAAACCAT  
TCCAGGGGGACATATGACGTTAGGAGAGGAGATGCTAGAGAAGGCTTTCAAAGAGTATTTTTGGTCCAGCAGGGAAGAAATTTGGG

>Bcin16g03460 (MLST7), partial sequence [organism=Botrytis cinerea, strain CH14\_ES\_11\_1]  
ATGAACCTCTTGATTTGAACTCTTCATTAATTGCAAGTGATGAACCCCTATTCTGCCAGAGGATAGTTACAAGACGTATATCATTAGTCGAGA  
ACCACCTCATGATATATATTGACGGATTTTGTAAAAGCGAATGAAAAGTAAACATTTGGTTGATGTTAGGTGTGTTATTTATTTCTGATGAAATGAAC  
AAGAGAGACTGATGAGATAGTGAGCCGCTTTATGAACCGTCAACTGTTTCTCACGGACAGGAAGTTACCATTTGATCCTTCAGTTCCGGAATTCGT  
AAGTGGCGGTTTTAGAGAGGGATGAGGTGGTCAGGTGATTTGAGCATAGAGCGAGGCGATTTTCAGGGTGGAGGGGCGAGATGGGGATTGAGAA  
GTTGAGGACGCAGAGGTATGGGTTGGAGGACATTTATGGGATGCATTTGTAAGTTTTGGGGATTGACGAAGGCTTCTGTCTATTTTCTATCAG



```
CACGGATCTTGAAAAGAAAGATAGCATGAACACGCGGGCTAATAACTAGGAAATAGCGATTGGAGCGGAGGTAAACGTGGCATAGACCGATTTAG  
TACTTTTCATGGTCTATGTCGACGTATCCTCTGATATCGAAGGTGGAGGAACGGAATCCCACGTATCGTGGGACCAAAAGGAGGAAGGTGGGAG  
GACTTCCTGGAAACTACGGAAGCATTTGGATCCAAGAACTGGAGAAAAATGTAAACAGTAGAAGGGGTGACATTCAAACCAATCAAGGGAAATGCCG  
TATTCTGGGAAAAATACTGACAACAACGGGAGGGGGCTATGAT
```

```
>Bcin12g03020 (MLST8), partial sequence [organism=Botrytis cinerea, strain CH14_ES_11_1]  
CGATTGGCTGCGAAGAAAAGTGCAGCACCAGTACCCAAAAGCAGCAATAAACCATCGGCAAGGGAAATATCTCTGAACCACAACATGACA  
CGAGCGCGGAAGAGTATATCGGGCGAGAAGCTTCATCAAGAGCACCAAAGCGACAACGAGTCGATGATAATTATAACTCTTACGGTGAAGAAA  
TGAAAATACAGCAGCTTATGCTTCCGGGAACTTCCATCTGGAAGTATAAATGTTGGTGGAGGTAGGAAGACCCTTTTCAAGAAGAACCACGA  
ACGGCATTGTGCGTGGCAAGTTGCCCTTGGAGTATCAACATTTGGTGGAAAGAGGCTACCCAAATCGAGGACGAGGGTAGAGCAGCTTATG  
CTTCCGGAAAAATGCTCCAGGAAGTATAAACTCTGGCGCAAAGAGGCGATTTTCATTCCAAGATGAAACGAGACCGGCTTATGCTCTCCGAAA  
GCTTCCACATGGTAGTATCGACGGTATGCGAAAACCGTGAAATGGCTGCCCTCCACCGCGAAAATTGCTGAGGGTGGGAGGAAACCAGGCCAGGTT  
GTCTCTCTCTATTACATTCATCTACTTCAAAGAAAATTTTGTGATGAACCCGAAGAACAAGCGGAACCGGCAAACCATCCAATGCGCCTT  
TGACAGAGGAAATGGCGACTTTACCAATCTAGGGTTATCGAGAAGGCTTGCAGCCATCTATCGACTAACTCGATATGAAAGCTCCGACCGC  
CATTCAAAGAGCATCTGTACAGCAGTTGGTATCGGACGATAGCGATGCTTTCATACAAGCAGAGACTGGATCTGGAAAAACTTTGGCATATCTA  
CTACCTATAGTCGAGCGAATATTAGCATTGAGTGAGAATGGCGTACAAA
```

```
>Bcin02g07770 (MLST9), partial sequence [organism=Botrytis cinerea, strain CH14_ES_11_1]  
ATTACAGCTTTCCCTTTCCGGTCTTGGCATCTACAGTCATTGCCATCCCTACACCATCACAACTTGAGTCTCGGGCCGTTATCGATTCCGATGCC  
GTTGTAGGATTTGCCGAACTGTTCCAGTGGGACCGTAGGAACAGTTTATGAGGCATATAAACCATTCCTTAAAGTCGTAAATGGATGCGTAC  
CATTCCCTGCCGTCGATGCATCGGGTAACACAGGGTATGTCTTATATCTTTCTCTCCACACGATTGCTATTTGAGTCTCTAACATATTTTAGT  
GGTGGTTTTGTACCAACTGGCAGTAGCAATGGTGGTTGCAGCAGCAGTACCGGTCAAGTATATGTTTCGAGGAGGACAAAGCGGATCAAACACTAG  
CCATCATGTACTCTCGTAAAGTTCTCTCTAAACTTCTCTTATAGATCCAACCTAACAAAATCTTAGGTACATGCCAAAGGACGAGCCCTCAAC  
CGGTATTGGTCACCGTCACGATTGGGAAGGTGTAATTTGCTGGCTCTCCAGCGCCACCGCCACAACCTGCCGACAACATCTTAGCCGTTTGTCT  
TCCGCCACCGGAGGCTGGGATTTGTTCCACGGATGGCTATTCCTTTCTGGTACCAGCCCTCTTATCAAGTACGAAAGTATCTGGCCCGTCGATC  
ACTCAATGGGTCTTACTAGTACTGTTGGTGGAAAAACAACCTATGATTGCTTGGGAGTCTTTACCAACTGCTGCTCAAACCTGCTCTTGAGAACAC  
CGATTTCCGGTCTGCGAATGTTCCATTCATTCCGGCTGTTTTTCACAGACAATCTTG
```

```
>Bcin04g02090 (MLST10), partial sequence [organism=Botrytis cinerea, strain CH14_ES_11_1]  
GCGGAGGATGATATGGCAAAGTCTATGATTACCAAAGCATTTGTAGGCATGAGTAGTAAACTGTGCAATATGACTATGAATGATGTTTACAAGC  
CCTACATCCATGTAAGAAATGTAGAATAGAGAGATCAGTAACTGGAATAATATCGTTTGTAGGCTTTCAAGTTACTTACGCAGTTCAACCCAA  
TCACTACAGCTATTGCCGAATCCCCTACTGTTTCAAATGGCCGCTCAGCAAATACCATCGAAAAGTACACACTGCTAGGCCCTTTCTTTCAGAAT  
ATCTCTCTGCAACAGGAAGTTACCAGGGAAATACTTCAGTGCGCCAAAAGACGATAGATAGGCCGACACATTGCCACATCTCAAGATGCGTTACGA  
TTGACCTTACAAAACCCATCAAAAAGATTTACTTTGATATCATCAACCCTTTGTTTCGAGCAAGTCCAATCGCAAAAAGCAAACCCCTGGATTGGT  
TCGCCTACATTGTGAATCAAAATCACAAGCGTCGAGCACTTCAGGTAGACCCGAAAGAAGTGTCTTCTGATGGCTTTATGCACAATGTCACTGT  
CGTTCTAGATGGTCTTTGTGAGCCATTCATGGATAACCACATCTCGAAAATTTGCAAGATTGATATTGATTATCTAAGACGTGCGCCTCGTGTA  
GATATCAAGGACGAGACCAAGTTGAACGCTGACGAGAGGCTTCTGAGAAGTATTATGAGGACACTGTTCTGACACTTCTAATTTTCATCTCTGA  
GGTCTTCTTTCTCACATTTGGCTGCTCATCATTTATGGTAGTGAAACTCTTAATGCCACGCATAAGAGTCTGGAGAAAGACATCAAATATATTCAA  
AAGCAATTGACTGCCGTTGAAGCA
```

```
>Bcin01g07220 (MLST1), partial sequence [organism=Botrytis cinerea, strain CH14_ES_11_5]  
GATGGCATACTTGTCTTTTCGCATTATGCTTTGGAACGTGCTGGACAAGCTTGGGTTAGTGCTCTGCGTGTAGAAGCACTAAAGAAGATTC  
TCGACAACCGAAGCCATGGTTTGGGAATCCAGGAATTCACCTAGCCGGTTGAACGAAAGTTTTGGATAGGAACCTGAGGAAATGCGTAATCT  
CGTTGGCCGCTTTGCTGGTATTGTATTACAGCATTTTTTATGCTATTGATATCAATCATTTGGGCTTTCGTGAATACATGGAAACTGACATTA  
GTCTCAATGGCAACTGGCCAGTTATATACGCTGTCACCAAACGTTCAATCGCGTGAGTGAAAATGGGAAAACAAGTGCAACTACGCATCTG  
AAATGACCACTGGCATATTTTCAGAGACTTTCTCCAACATCAAAGTGGTTCCGGCTTTTACTCTGGAAACTTACTTTAAGACAAAACACACCAA  
AGCTACAGAAGAACTCTATAAAGTTGGACTAATACGAGCAAACCTACTCGGGATTTGCTGTGGGGATTGACAGATGCAATGTCAATCTTTCATCACT  
GCAACTATCTTTTATTATGCCACGGTTCTCATTACCAAGAGAGAGATCAGTATCGCGGCTGCACTACAGACTGTCAATCTTCTATTATTTGGTA  
TTTCTAATAGTACGAATATGCTGGCCATGATACCACAAATCAACTCTTCTCGGTTACAGCTACGCATATGCTTGCATTAGCCAATCTCGATTC  
ATCTTCTCCACGAAAATAAAGGAACCGAACGGCTTTTCGACAATCTTTCCAATCAAATTCACCGCTTTTCATTCACATACCCCTACTCGTCT  
GAAAAACGAACGATATCATCTTTTCTCTTTCCCTGATTCCTAACTCAACAACTGCACTTGTTCGGACCCCTCCGGCTCCGGAAAAATCTACAATAG  
CTGCTCTGCTCATTGGTCTCTATCCGCCAGATACTTCAACACCTCCACCGTTGACATTCATCGCGTCTCCATAAGTAACGTGCACATTCGGTC  
TCTCCGGGCTTCTCTCTACTCGTTCCACAAATACCGATTTCTATTTCCAGCTACCATTTCTCCATAACATCATTTATGGTCTCCAGAATCTTCT  
CCTTGTGCTAGTCTTCATCTGCTATTGCATCAGCAAAAGATGCTGGGATCCATGAATTTATCACATCGCTTCCACAAGGTTATGATACTAT
```

```
>Bcin05g07690 (MLST2), partial sequence [organism=Botrytis cinerea, strain CH14_ES_11_5]  
CACCCTATACCAAGTCTTTTCTGCACTTCTCTCATCAAAAACGAACGAGAATCATCAATAAATACTTTGCTGAAGTAATTGGGTTTTAT
```

TTTGGCCAGGATGCCTTCTCTCTACGACAGCAAGCCTTCGATGATATGTTGTGGGTAGTTCTTGGCTGGCTGGATACTGTCAAATTCATTGATT  
TACATTCTGAATTGCACTATTCAAACGACTCTCAGCCAGAATGGTACGGACAACAATATAAACCTGCATTTGCACATCGAGCGGACTATTTTG  
GGAATTGGCTTACAAGGATGGGATACTACTCTCTGTGGTGGTGGGATGATATGGTCACCATACTTACTCCATAACAAGAACGCAATTACCAAT  
GAACTCTATATCGCAGCTTCGATATCGATGTACCTATATTTCCCCGGAGATGACAATCAATCCCCATTTATGCTTTCCAACCCTTCATATCCAC  
CTCACGATCCGAAATATCTACAGGCAGCTGTTGATGCTTACAAAATGGCTGAATGGTTCACACATGACGGATTTACAAGGATTATATGTCGACGG  
GTACCATATCTCGAATCTTTCTGGCGGTGAAAACACCCATTGCGATTCTAGAAAATGAGATGGTATATACCTACAATCAAGGTGTTTTGCTTACT  
GGACAACGTGGTTTTGTATGACGCAACCGCCGACGATCATACTTGTAGATGGCCACAACCTCATCGCGAATGTTATTAATGCCACAGGCTATG  
ACCTGAAAACACAATGTTGTCATCTCACCGCCACCCAAAAGATGGTTCCGCATTGGCAAAGTGGTTTTGGCTGGGTAGGAATGGAATACTGGAAGA  
AGGATGCGATTCAAGTCTTCGTGTTCTCAAAAATGGACAACTTTCAAAGGCATATCTTTTCATCACTTGATTGCGTTCTGTAGTGATTTGCCA  
GGGGAGCCTATTGCAGGGACGAAGGAAAGCTTAGAACTCGACAGAGTGTGGCATTCTGACAAATGCTCACAGTATACAAAAT

>Bcin06g01710 (MLST3), partial sequence [organism=Botrytis cinerea, strain CH14\_ES\_11\_5]  
TGGTGAGTCTGACTTTTGTATTTGAGCGTTAAGATAGACTGATATACCAAGGCAATCACCTAATTTTCATGGCGTTCTTCCCTGCATCATCTA  
CCTACCCTGGAATGCTGGGAGAATTATACTCAGCAGCTTTACAGCACCTGCTTTCAATTGGATCTGTTCCCTGCTGTGACAGAATTGGAGAC  
GGTTGTAATGGATTGGCTGGCCAAGCTTCTCAATCTCCAGACTGTTATTTGTCTTCGACTCATGGTGGTGGTGTCTCCAAGGATCAGCCTCG  
GAAGCTATCGTTACCGTTATGGTTGCTGCCCGGATAAAATATCTTCGTGAACTACTGAAGTCTGTGCGGCATTGAACTCGAGGATGCGATTG  
CATATAAGAGGAGTAAGCTAGTTGCACTAGGAAGCGAAATGGCACACAGCTCCACGCAGAAAAGCAGCGCAAATAGCTGGCGTTAGATTCCGATC  
GATTCCAGTACTCGCATCCAATGATTTGCCCATGACGGGTGATGATTTAGAGAAGGTATTGAAAGAATGCAAATCTCAAGGATTGGAACCTTC  
TATCTAACTTCGACTTTGGGAACAACATCTACATGCGCAGTTGACGACTTCGCATCTATTGCAACAGTACTTTCAAATATGCACCTCCAGATG  
TTGCAGGCGAGATCTGGGTTACGTCGATGCTGCTTATGCAGGTGCAGCTTTGGTTTGGCCTGAATACCATCATCTAACATCGTCTTCCAGCA  
TTTCCATTCTTCGATATGAACATGCACAAATGGCTTCTGACAAATTTGACGCTTCTTGTCTATATGTCAAGAAACGCAAAGATCTGATCGAT  
GCACTCTCCATAACACCAAGTTATCTTCGCAACGAGTTTTCAGAGAGTGGACTCGTAACCGACTATCGGGACTGGCAAATTCCTCTCGGAAGAC  
GCTTCCGAAGCTTAAAGATTTGGTTTTGTCTCAGAACCTAC

>Bcin09g03030 (MLST4), partial sequence [organism=Botrytis cinerea, strain CH14\_ES\_11\_5]  
ACCCTTCAACCCACCGCAGCTCCTATACCAAAAGCGAGTATCCTACCAATTCCTCTTCCACCTGCGACTTTAAGACCATTGGCTTTCCGCACT  
TTCACAAAAAAGCATAGTTTAAACATTGACGTCGTCGGCATTACAAGTGTGGCTACTTTTTATTGGAAAGCATTGTGGGACAGGATGGAGGGAAG  
AAGGACTGGCAGAGAGAGTCTTGGAGGAGGTGCGCAAGAGTTGGAAGAATAGGAGTGGCGGTGTCATTGTGCGAGGGCGAGGGAACGGAATTGAA  
GGAGATTCTGAAAGCTTTGGAAGGGAATATGAGTGGTGAAGGATAGTTCATAGGAAGAGAGCTAAGCCGGCAGAATAGTTTAGTACTGGGATCA  
TCACAATATGGAGAGGTCAATCATAACAAGACTTGGGCTACGGCCAGGGAATATACCCAGAGAGGATAGTCAAGTGTGGGAATGTCAACGT  
TGGAGGTCAATGACGAGGAAGATGAGGATGGCCTGATGGATCCAAGAAGTGGTTAAAAGTCATTGATGCATTTGAGCAACCTCGACTGGTGT  
CAATGTTGCTAAAAAGCACTTTGATAGGTATGTTTCAATGATAAAAATTTTATCTGAATCGACTAACTCAGTACAGAGATACCTCCAAACCTTCA  
TTGTTCCACCTGCGTCTCATAAAACACTCCTCTTCCAAAACCGCTATAATGTTATCCATCAACGCTCTCCTTCGCAATGAATCTTTTCAAACGC  
CCGCTTTTCAAGGTGGCAAATCTTCCCTTCAACGCAGCACGTCCGCCATTACCACCAACAACAATCATACAAATTAACGCCGATAGCTAATCT  
TCTCGGTGCAATCGCAGCTCTCATATGCTTCTCGGTCTCCTCAGTATTTACCCTGTTACCCTCGCCATCAATGACCTGACGGGCAGTATC  
GCTCTCGATCTTACACACGCAGCAGCCATTCC

>Bcin11g01310 (MLST5), partial sequence [organism=Botrytis cinerea, strain CH14\_ES\_11\_5]  
ACTGACATGGACCTCATGTGGAACCGCGTAGAATGCGCAACGCTTGAAGTTCGCTCGAATATGGCGATGCAACGTCAACGGCAAAGCCAGT  
GTTGCGCTTGCTCGTTATCCTGCCACTGTTGCCGCGAGCAAGAAGCTCGGGTCTCTCTTGATAAAATCCCGGTGGACCCGGTGCCTCTGGTGTG  
GCTTTGTGCACTCTGGAGCCGGTGCCCGCTCTCGACACTGAGTGGTGGATTGTACGATATCATCGGATGGGATCCACGTGGAACCGGTGCTTC  
GGCTCCTATTTTGGAAATGTTTTGCAAATGCCAGTGGGAGTATGATTTTAAACAACGCTTTCCATCTGCTCCGAATCTCTGGCTCGGACAATTT  
GCGAATGCCAGCGCAAATCTGCTGTTAGTCTGCTATCACATCCTTTGACACTTCTGTCGCTGCTCTTGCAAAAGCTTGGCTGGCTCAGAAAT  
CTCCCGCTCTTTACACCTCAACAGCAGCATATGTTGCTCGAGACATGGCAGCGATAGTTCGATGCATTTGGATGGGACCTCTGCAAACTTAACTA  
CTGGGGTTTCTCATATGGAATATTTTCCCTAGCTGAGTTTATCCAACTTTCCAGGCCGCGTGGGAAGAGTCTTGGCCGATGGTGTTCGAC  
GCAAAGGCAAATGCACTCACATACGTTAGCCAATTTCCCAACGATCAACTCAGTGTTCGTGCTTCGTTGAACGATTTTGCAGCTTTCTGCACCA  
CCGCCGGTAGTAAAGGTTGCTCTTTTGGCACCGCCCTACTGGAACCACAGGTAAGTGTGCTACCAGACTGGACAACATAATGAAGGATATGTT  
CCTCAATCCTATTGTTGCTTCGGGCTTAAAGCATCA

>Bcin15g03910 (MLST6), partial sequence [organism=Botrytis cinerea, strain CH14\_ES\_11\_5]  
CGCCAAAACACAAAATCATCCAACGATGAAGATGATACTCCACTTCCCTTGATTATCTGGCATGGACTCGGCGATAATTACAAAGCGGATGGTC  
TTGCGCAAGTTGGAAAACCTAGCTGAAGCTATTTCATCCTGGGACTTTTGTCTACAATATTCATGTAGATGAGGATGCATCTGCAGATAGGACAGC  
TACCTTCTTTGAAAATCTCACTCGTGAGTACATCCCTATTTTCTTTAAATATCATACTAACTCTTTACCAAGTTCAAATCGAAAAGGTCT  
GCGAAGACCTCGCTCCCATCTATTTCTCTTACCAGCGCCCGCTCGACGCAATTTGGATTCTCCCAAGGCGGCAATTTCTGCGTGGTTACAT  
ATCCCGCTGCAATGCTCCACCCATCCGCTCTCTCCTGACCTTTGGTTCCCAACACACAGGCAATTTCTGCTTCCAAGCTGTGGTCTGCGGAT  
TTCTCTGTGCGGTGCTCAAACCTTTTGGGATCCAACACCTGGTCAACCTTTGTCCAATCTCGTCTCGTACCAGCTCAATACCTCAGAGATC  
CGAAAACCTAGACTCTTACCTTGAATATTTCAAATTTCTTGGCGACATCAATAATGAGCGGTTCTCAAGAACCAACATAATAAATCCAACAT

```
GGAAAAATTGGAACGATTCGTAATGTATGTCTTTGAAGACGACACAACCTGTCATTCCTAAGGAAAGTGGATGGTGGGCTGAAGTCAACGGCACG
GAAGTTACACCACTGAAAGAAAAGAGCCATTTATAAAGAAGATTGGCTAGGTTTAAAGACATTGGATGAGGCCGAAAAATTAGTTTTCGAAACCA
TTCCAGGGGGACATATGACGTTAGGAGAGGAGATGCTAGAGAAGGCTTTCAAAAGAGTATTTTTGGTCCAGCAGGGAAGAAATTTGGGG
```

```
>Bcin16g03460 (MLST7), partial sequence [organism=Botrytis cinerea, strain CH14_ES_11_5]
ATGAACCTCTTGATTTGAACTCTTCATTAATTGCAAGTGATGAACCCCTATTCTGCCAGAGGATAGTTACAAGACGTATATCATTTAGTCGAGA
ACCCTCATGATATATATTGACGGATTTTTGAAAAGCGAATGAAAAGTAAACATTTGGTTGATGTTAGGTGTGTTATTTATTTCTGATGAAATGAAC
AAGAGAGACTGATGAGATAGTGAGCCGCTTTATGAACCGTCAACTGTTTCTCACGGACAGGAAGTTACCATTGATCCTTCAGTTCGGAATTTCTG
AAGTGGCGGTTTTAGAGAGGGATGAGGTGGTCAGGTGTATTGAGCATAGAGCGAGGGCATTTCAGGGGTGGAGGGGCGAGATGGGGATTGAGAA
GTTGAGGACGCAGAGGTATGGGGTTGGAGGACATTATGGGATGCATTTGTAAGTTTTGGGGGATTGACGAAGGCTTCTGTCTATTTTTCTATCAG
CACGGATCTTGAAAAGAAAAGATAGCATGAACACGCGGGCTAATAACTAGGAAAATAGCGATTGGAGCGGAGGTAACCGTGGCATAGACCGATTTAG
TACTTTTCATGGTCTATGTGACGATCCTCTGATATCGAAGGTGGAGGAACGGAATTTCCACGTATCGTGGGACCAAAAAGGAGGAAGGTGGGAG
GACTTCTGAAACTACGGAAGCATTGGATCCAAGAACTGGAGAAAATGTAACAGTAGAAGGGGTGACATTCAAACCAATCAAGGGAAATGCCG
TATTCTGGGAAAATACTGACAACAACGGGGGGGGCTATGAT
```

```
>Bcin12g03020 (MLST8), partial sequence [organism=Botrytis cinerea, strain CH14_ES_11_5]
CGATTGGCTGCGAAGAAAAGTGCAGCACCAGTCCACAAAAGCAGAAATAAACCATCGGCAAGGGAAATATTTCTCTGAACCACAACATGACA
CGAGCGCGGAAGAGTATATCGGGCGAGAAAGCTTCATCAAGAGCACAAAAGCGACAACGAGTCGATGATAAATTATAACTCTTACGGTGGAAAGAA
TGAAAATACAGCAGCTTATGCTTCCGGGAAACTTCCATCTGGAAGTATAAATGTTGGTGGAGGTAGGAAGACCCTTTTCAAGAAGAACCACGA
ACGGCATTGTGCTGCAAGTTGCCCTTGAAGTATCAACATTTGGTGGAAAGAAGGCTACCCAAATCGAGGACGAGGGTAGAGCAGCTTATG
CTTCCGAAAATGCTCCAGGAAGTATAAAGTCTGGCGCAAAGAAGGCGATTTCAATCCAAGATGAAACGAGACCGGCTTATGTCTCCGGAAA
GCTTCCACATGGTAGTATCGACGGTATGCGAAAACCGTGAATGGCTGCCGTCCACCGCGAAAATTGCTGAGGGTGGGAGGAAACCAGGCCAGGTT
GTCTCTTCTCTATTTCACATTCATCTACTTCAAAGAAAACCTTTTGATGAACCCGAAGAACAAGCGGAACCGGCAAACCATCCAATGCGCCTT
TGACAGAGGAAATGGCGACTTTCACCAATCTAGGGTTATCGAGAAGGCTTGCAGCCCATCTATCGACTAAACTCGATATGAAAGCTCCGACCGC
CATTCAAAAAGCATCTGTACAGCAGTTGGTATCGGACGATAGCGATGCTTTCATACAAGCAGAGACTGGATCTGAAAAAACTTTGGCATATCTA
CTACCTATAGTCGAGCGAATATTAGCATTGAGTGAGAAATGGCGTACAAA
```

```
>Bcin02g07770 (MLST9), partial sequence [organism=Botrytis cinerea, strain CH14_ES_11_5]
CAGCTTTCCCTTTTCGGTCTTGGCATCTACAGTCATTGCCATCCCTACACCATCACAACTTGAGTCTCGGGCCGTTATCGATTCCGATGCCGTTG
TAGGATTTGCCGAAACTGTTCCAGTGGGACCGTAGGAACAGTTTATGAGGCATATAAACCATTCCTTAAAGTCGTAAATGGATGCGTACCATT
CCCTGCCGTCGATGCATCGGGTAACACAGGGTATGTCTTATATCTTTCTCTTCCACACGATTGCTATTGAGTCTCTAACATATTTTAGTGGTG
GTTTGTACCAACTGGCAGTAGCAATGGTGGTTGCAGCAGCAGTACCGGTCAAGTATATGTTTCGAGGAGGACAAAGCGGATCAAACACGCCAT
CATGTACTCTGGTAAAGTTCTCTCTAAAACCTTCTCCTTATAGATCCAACCTAACAAAACTTATAGGTACATGCCAAAGGACGAGCCCTCAACCGGT
ATTGGTCAACCGTCAAGATTGGGAAGGTGTAATTTGCTGGCTCTCCAGCGCCACCGCCACAACCTGCCGACAACATCTTAGCCGTTTGTCTTCCG
CCCACGGAGGCTGGGATTGTCCACGGATGGCTATTTCCCTTTCTGGTACCAGCCCTTATCAAGTACGAAAAGTATCTGGCCCGTCGATCACTC
AATGGGTCTTACTAGTACTGTTGGTGGAAAAACAACCTATGATTGCTTGGGAGTCTTTACCAACTGCTGCTCAAACCTGCTCTTGAGAACACCGAT
TTCGGTGTGCGAATGTTCCATTCATTCCGGCTGTTTTACAGACAATCT
```

```
>Bcin04g02090 (MLST10), partial sequence [organism=Botrytis cinerea, strain CH14_ES_11_5]
CGGAGGATGATATGGCAAAGTCTATGATTACCGAAGCATTGTAGGCATGAGTAGTAACTGTCGAATATGACTATGAATGATGTTTACAAGCC
CTACATCCATGTAAGAAAATGTAGAATAGAGAGATCAGTAACCTGGAACATAATATCGTTTGTAGGCTTTCAAGTTACTTACGCAGTTCACCCCAAT
CACTACAGCTATTGCCGAATCCCCTGTTTTAAATGGCCGTCTCAGCAAATACCATCGAAAAGTACACACTGCTAGGCCCTTTCTTTCAGAATA
TCTCCTCTGCAACAGGAAGTTACCAGGGAATACTTCAGTGCGCCAAAGACGATAGATAGGCGACACATTGCCACATCTCAAGATGCGTTACGAT
TGACCTTACAAAACCATCAAAAAAGATTTACTTGATATCATCAACCACTTTGTTCGAGCAAGTCCAATCGAAAAAGCAAAACCCCTGGATTGGTT
CGCCTACATTGTGAATCAAAAATCACAAGCGTCGAGCACTTCAGGTAGACCCGAAAGAAGTGTCTTCTGATGGCTTTATGCACAATGTCACCTGTC
GTTCTAGATGGTCTTTGTGAGCCATTCATGGATACCACATTTCTCGAAAATTTCGAAGATTGATATTGATTATCTAAGACGTGCGCCTCGTGTAG
ATATCAAGGACGAGACCAAGTTGAACGCTGACGAGAAGGCTTCTGAGAAGTATATGAGGACACTGTTCCCTGGCACCTCTAATTTTCATCTCTGA
GGTCTTCTTTCTCACATTTGGCTGCTCATCATTATGGTAGTGAAGCTCTTAATGCCACGCATAAGAGTCTGGAGAAAGACATCAAATATATTCAA
AAGCAATTGACTGCCGTTGAAGCAG
```

```
>Bcin01g07220 (MLST1), partial sequence [organism=Botrytis cinerea, strain D06_1_30]
GATGGCATATCTTGTCTTTTCGCATTATGCTTTGGAACGTGCTGGACAAGCTTGGGTTAGTGCTCTGCGTGTAGAAGCACTAAAGAAGATTC
TCGCACAACCGAAGTCATGGTTTGGAGGAATCCAGGAATTCACCTAGCCGTTGAACGAAGTTTTGGATAGGAACTCTGAGGAAATGCGTAATCT
CGTTGGCCGCTTTGCTGGTATTGTATTCACAGCATTTTTTATGCTATTGATATCAATCATTTGGGCTTTTCGTGAATACATGGAAACTGACATTA
GTCTCGATGGCAACTGGGCCAGTTATATACGCTGTCACCAAACGTTCAATCGCGTGAGTGGAAAATGGGAAAACAAGTGAACCTACGCCCTCTGA
AATGACCACTGGCATATTTTCAGAGACGTTCTCCAACATCAAAGTGGTTTCGGGCTTTTACTCTGAAAACCTTACTTTGAGACAAAACACACCAA
GCTACAGAAGAACTTTATAAAGTTGGACTAATACGAGCAAACCTACTCGGGATTGCTGTGGGGATTGACAGATGCGATGTCATTTCTCATCACTG
```

```
CAACTATCTTTTATTATATGCCACGGTCTCATTACCAAGAGAGAGATCAGTATCGCGACTGCACTACAGACTGTCAATCTTCTATTATTTGGTAT
TTCTAATAGTACGAATATGCTGGCCATGATACCACAAATCAACTCTTCTCGCGTTACAGCTACGCATATGCTTGCATTAGCCAATCTCGATTCA
TCTTCTCCCACGAAAAATAAAGGAACCGAACGGCTTTTCGACAATCTTTCCAATCAAATTCACCCGCTTTTCATTACATACCCTACTCGTCTG
AAAAACGAACGATATCATCTTTTCTCTTTCCCTGATTCTAACTCAACAACTGCACTTGTCCGGACCCCTCCGGCTCCGAAAAATCTACAATAGC
TGCTCTGCTCATTGGTCTCTATCCGCCAGATACTTCAACACCTCCACCCTTGACATTCAATCGCGTCTCCATAAGTAACTGTACATTCCGCTC
CTCCGGGCTTCTCTCTCACTCGTTCACAAATACCGATTCTATTTCCAGTACCATTCTCCATAACATCATTTATGGTCTCCAGAATCTTCTC
CTTGTGCTAGTCTTCCATCTGCTATTGCATCAGCAAAAAGATGCTGGGATCCATGAATTTATCACATCGCTTCCACAAGGTTATGATACTAT
```

>Bcin05g07690 (MLST2), partial sequence [organism=Botrytis cinerea, strain D06\_1\_30]

```
CACCACTATACCAAGTCTTTTCTGCACTTCTCTCATCAAAAACGAACGAGAACATCATCAATAAAATACTTTGTGAAGTAAATGGGTTTTAT
TTTGGCCAGGATGCCTTCTCTCTACGACAGCAAGCCTTCGATGATATGTTGTGGGTAGTTCTTGGCTGGCTGGATACTGTCAAATTCATTGATT
TACATTCTGAATTGCACTATTCAAACGACTCTCAGCCAGAATGGTACGGACAACAATATAAACCTGCATTTGCACATCGAGCGCGACTATTTTG
GGAATTGGCTTACAAGGATGGGATACTACTCTCTGTGGTGGTGGGATGATATGGTACCATACTTACTCCATAACAAGAACGCAATTACCAAT
GAACTCTATATCGCAGCTTCGATATCGATGTACCTATATTTCCCGGAGATGACAATCAATCCCATTATGCTTTCCAACCCTTCATATCCAC
CTCACGATCCGAAAATATCTACAGGCAGCTGTTGATGCTTACAAAATGGCTGAATGGTTCCAACATGACGGATTTACAAGGATTATATGTCGACGG
GTACCATACTCGAATCTTTCTGGCGGTGAAAACACCCATTGCGATTCTAGAAATGAGATGGTATATACCTACAATCAAGGTGTTTTGCTTACT
GGACAACGTGGTTTTGTATGACGCAACCGCCGACGATCATACTTGTAGATGGCCACAAACTCATCGCGAATGTTATTAATGCCACAGGCTATG
ACCTGAAAACACAATGTTGTCATCTCACCGCCACCCAAAAGATGGTTCCGCATTTGGCAAAGTGGTTTTGGCCTGGGTAGGAATGGAATCTGGAAGA
AGGATGCGATTCAAGTGTCTCGTGTCTCAAAAATGGACAACTTTCAAAGGCATATTTCTTTCATCACTTGATTGCGTTCTGTAGTGAATTTGCCA
GGGAGCCTATTGCAGGGACGAAGGAAAGCTTAGAACTCGACAGAGTGTGGCATTCTGACAAATGCTCACAGTATACAAAAAT
```

>Bcin06g01710 (MLST3), partial sequence [organism=Botrytis cinerea, strain D06\_1\_30]

```
GTGAGTCTGACTTTTGTATTTGAGCGTTAAGATAGACACTGATATACCAAGGCAATCACCTAATTTTCATGGCGTCTTCCCTGCATCATCTACC
TACCCTGGAATGCTGGGAGAATTATACTCAGCAGCTTTCACAGCACCTGCTTCAATTGGATCTGTTCCCTGCTGTGACAGAATGGAGACGG
TTGTAATGGATTGGCTGGCCAAGCTTCTCAATCTCCAGACTGTTATTTGCTTTCGACTCATGGTGGTGGTGTGCATCCAAGGATCAGCCTCGGA
AGCTATCGTTACCGTTATGGTTGCTGCCCGGATAAAATATCTTCGTGAACTACTGAAGGTCTGTCCGGCATTTAGCTCGAGGATGCGATTGCA
TATAAGAGGAGTAAGCTAGTTGCACTAGGAAGCGAAATGGCACACAGTCCACGCAGAAAGCAGCGCAAATAGCTGGCGTTAGATTCCGATCGA
TTCCAGTACTCGCATCCAATGATTTGCGCATGACGGGTGATGATTTAGAGAAGGTGTTGAAAGAATGCAAATCTCAAGGATTGGAACCTTCTA
TCTAACTTCGACTTTGGGAACAACATCTACATGCGCAGTTGACGACTTCGCATCTATTTGCAACAGTACTTTCAAATAATGCACCTCCAGATGTT
GCAGGCGAGATCTGGGTTACGTCGATGCTGCTTATGCAGGTGCAGCTTTGGTTTGGCCTGAATACCATCATCTAACATCGTCTTCCAGCATT
TCCATTCTTCGATATGAACATGCACAAATGGCTTCTGACAAATTTGACGCTTCTTGTCTATATGTCAAGAAACGCAAAGATCTGATCGATGC
ACTCTCCATAACACCAAGTTATCTTCGCAACGAGTTTTCAGAGAGTGGACTCGTAACCGACTATCCGGACTGGCAAATTCCTCTCGGAAGACGC
TTCCGAAGCTTAAAGATTTGGTTTTGTCTCAGAACCCTAC
```

>Bcin09g03030 (MLST4), partial sequence [organism=Botrytis cinerea, strain D06\_1\_30]

```
ACCCTTCAACCCACCGCAGCTCTATACCAAAAGCGAGTATCTTACCAATTTCTCTTCCACCTGCGACTTTAAGACCATTGGCTTTCCGCACT
TTCACAAAAAAGCATAGTTTAAACATTGACGTCGTCGGCATTACAAGTGTGGCTACTTTTTATTGGAAAGCATTTGTGGGACAGGATGGAGGGAAG
AAGGACTGGCAGAGAGAGTCTTGGAGGAGTCCCAAGAGTTGGAAGAATAGGAGTGGCGGTGTCATTGTGCGAGGGCGAGGGAACGGAATTGAA
GGAGATTCTGAAAGCTTTGGAAGGGAATATGAGTGGTGGAAAGGATAGTCATAGGAAGAGAGCTAAGCCGGCAGAATAGTTTAGTACTGGGATCA
TCACAATATGGAGAGGTCAATCATAACAAGACTTGGGCTACGGCCAGGGAATATACCCAGAGAGGATAGTCAAGTTTGGGAATGTCAACGT
TGGAGGTCAATGACGAGGAAGATGAGGATGGCCTGATGGATCCAAGAAAGTGGTTAAAAGTCATTGATGCATTTGAGCAACCTCGACTGGTGTG
CAATGTTGCTAAAAAGCACTTTGATAGGTATGTTTCAATGATAAAAATTTTATCTGAATCGACTAACTCAGTACAGAGATACCTCCAAACCTTCA
TTGTTCCACCTGCGTCTCATAAAAACACTCCTCTTCCAAAACCGCTATAATGTTATCCATCAACGTCTCCTTCGCAATGAATCTTTTTCAAACGC
CCGCTTTTCAAGGTGGCAAATCTTCCCTTCAACGCAGCACGTCCGCCATTACCACCCAACAACAATCATACAAATTAACGCCGATAGCTAATCT
TCTCGGTCGCAATCGCAGCTCTCATATGCTTCTCGGTCTCCTCAGTATTTACCCACTGGTACCCTCGCCATCAATGACCTGACGGGCAGTATC
GCTCTCGATCTTACACACGCAGCAGCCATTTCCGAAGATAGCGCCTGGTTT
```

>Bcin11g01310 (MLST5), partial sequence [organism=Botrytis cinerea, strain D06\_1\_30]

```
ACTGACATGGACCTCATGTGGAACCGGCTAGAATGCGCAACGCTTGAAGTTCCGCTCGAATATGGCGATGCAACGTCAACGGCAAAGCCAGT
GTTGCGCTTGCTCGTTATCTGCCACTGTTGCCGCGAGCAAGAAGCTCGGGTCTCTCTTGATAAAACCCCGGTGGACCCGGTGCCCTCTGGTGTG
GCTTTGTGCACTTGGAGCCGGTGCCCGCTCTCGACACTGAGTGGTGGATTGTACGATATCATCGGATGGGATCCACGTGGAACCGGTGCTTC
GGCTCCTATTTTGAATGTTTTGCAAATGCCAGTGCAGGATGATTTTTAACAAACGCTTTCCATCTGCTCCGAATCTCTGGCTCGGACAATTT
GCGAATGCCAGCGCAAATTTGCTGTTAGCTCTGCTATCACATCTTTGACACTTCTGTGCTGCTCTTGCAAAAGCTTGGCTGGCTCAGAAAT
CTCCCGCTCTTTACACCTCAACAGCAGCATATGTTGCTCGAGACATGGCAGCGATAGTCGATGCATTGGATGGGACCTCTGCAAAACTTAACTA
CTGGGGTTTCTCATATGGAACATTTTTCTTAGCTGAGTTTATCCAACTTTCCCAAGCCGTGTGGGAAGAGTTCTTGGCCGATGGTGTTCGAC
GCAAAGGCAAATGCACTCACATACGTTAGCCAACCTCCCAACGATCAACTCAGTGTTCGTGCTTCTGTTGAACGATTTTGCAGCTTTCTGCACCA
CCGCCGGTAGTAAAGGTTGCTCTTTTGCACCACCCTTACTGGAACCTCAGTACTGTTGCTACCAGACTGGACAACATAATGAAGGATATGTT
```

CCTCAATCCTATTGTTGCTTCGGGCTTAAGCATCA

>Bcin15g03910 (MLST6), partial sequence [organism=Botrytis cinerea, strain D06\_1\_30]

GCCAAAACACAAAATCATCCAACGATGAAGATGATACTCCACTTCCCTTGATTATCTGGCATGGACTCGGCGATAATTACAAAGCGGATGGTCT  
TGCGCAAGTTGGAAAAGTAGCTGAAGCTATTCATCTGGGACTTTTGTCTACAATATTCATGTAGATGAGGATGCATCTGCAGATAGGACAGCT  
ACCTTCTTTGGAAAATCTCACTCGTGAGTACATCCCTATTTTTTCTTTAAATATCATACTAACTCTCTTACCAAGTTCAAATCGAAAAGGTCTG  
CGAAGACCTCGCCTCCCATCCTATTCTCTCTACCCGCGCCCGCTCGACGCAATTGGATTCTCCCAAGGCGGCCAATTCTTGCCTGGCTACATA  
TCCCCTGCAATGCTCCACCCATCCGCTCTCTCTGACCTTCGGTTCCCAACACACAGGCATTTCTGCCTTCCAAGCCTGTGGTCTGCCGATT  
TCCTCTGTGCGGGTCTCAAACCTTTTGGGATCCAACACCTGGTCAACCTTTGTCCAATCTCGTCTCGTACCCGCTCAATACTTCAGAGATCC  
GGAAAACCTAGACTCTTACCTTGAATATCCAATTTCTTGGCGACATCAATAATGAGCGGTTCTCAAGAACCAAACATATAAAATCCAACATG  
GAAAAATTGGAAACGATTTCGTAATGTATGTCTTTGAAAGACGATACAACCTGTCATCCCTAAGGAAAGTGGATGGTGGGCTGAAGTCAACGGCACGG  
AAGTTACACCACTGAAAGAAAGAGCCATTTATAAAGAAGATTGGCTAGGTTTAAAGACATTGGATGAGGCCGAAAATTAGTTTTTCGAAACCAT  
TCCAGGGGGACATATGACGTTAGGAGAGGAGATGCTAGAGAAGGCTTTCAAAGAGTATTTTGGTCCAGCAGGGAAGAAATTTGGG

>Bcin16g03460 (MLST7), partial sequence [organism=Botrytis cinerea, strain D06\_1\_30]

ATGAACCTCTTGATTTGAACTCTTCATTAATTGCAAGTGATGAACCCCTATTCTGCCAGAGGATAGTTACAAGACGTATATCATTAGTCGAGA  
ACCACCTCATGATATATATTGACGGATTTTTGAAAAGCGAATGAAAAGTAAACATTTGGTTGATGTTAGGTGTGTTATTTATTTCTGATGAAATGAAC  
AAGAGAGACTGATGAGATAGTGAGCCGCTTTATGAACCGTCAACTGTTTCTCACGGACAGGAAGTTACCAATTGATCCTTCAGTTCCGGAATTTCTG  
AAGTGGCGGTTTTAGAGAGGGATGAGGTGGTCAGGTGTATTGAGCATAAGAGCGAGGGCATTTCAAGGGTGGAGGGGCGAGATGGGGATTGAGAA  
GTTGAGGACGACAGGATGGGGTTGGAGGACATTTATGGGATGCATTTGTAAGTTTTGGGGGATTGACGAAGGCTTCTGTCTATTTTCTATCAG  
CACGGATCTTGAAGAAAAGATAGCATGAACACGCGGGCTAATAACTAGGAAAATAGCGATTGGAGCGGAGGTAACCGTGGCATAGACCGATTTAG  
TACTTTTCATGGTATATGTGACGATCTCTCTGATATCGAAGGTGGAGGAACGGAAATTTCCACGATTTGTGGGACCAAAGGAGGAAGGTGGGAG  
GACTTCTTGAAAACCTACGGAAGCATTGGATCCAAGAAGCTGGAGAAAATGTAACAGTAGAAGGGGTGACATTCAAACCAATCAAGGGAAATGCCG  
TATTCTGGGAAAATACTGACAACAACGGGAGGGGCTATGAT

>Bcin12g03020 (MLST8), partial sequence [organism=Botrytis cinerea, strain D06\_1\_30]

CGATTGGCTGCGAAGAAAAGTGCAGCAGCAGGAGTACCCAAAAGCAGCAATAAACCATCGGCAAGGAAATATTTCTCTGAACCACAACATGACA  
CGAGCGCGAAGAGTATATCGGGCGAGAAGCTTCATCAAGAGCACCAAAGCGACAACGAGTCGATGATAAATATAACTCTTACGGTGGAAAGAAA  
TGAAAATACAGCAGCTTATGCTTCCGGGAAAAGTTCATCTGGAAAGTATAAATGTTGGTGGAGGTAGGAAGACCCTTTTCAAGAAGAACCACGA  
ACGGCATTGTCGCTGGCAAGTTGCCCCCTGGAAGTATCAACATTTGGTGGAAAGAAGGCTACCCAAATCGAGGACGAGGGTAGAGCAGCTTATG  
CTTCCGAAAATGCTCCAGGAAGTATAAACTCTGGCGCAAAGAAGGCGATTTCAATCCAAGATGAAACGAGACCGGCTTATGTCTCCGAAA  
GCTTCCACATGGTAGTATCGACGGTATGCGAAAACCGTGAATGGCTGCCGTCACCCGCGAAAATGCTGAGGGTGGGAGGAAACCAGGCCAGGTT  
GTCTCTTCTCTATTACATTCATCTACTTCAAAGAAAAGTCTTTGATGAACCCGAAAGAACAAAGCGGAACCGGCAAACCATCCAATGCGCCTT  
TGACAGAGGAAAATGGCGACTTTACCAATCTAGGGTTATCGAGAAGGCTTGCAGCCCATCTATCGACTAAACTCGATATGAAAGCTCCGACCGC  
CATTCAAAAGCATCTGTACAGCAGTTGGTATCGGACGATAGCGATGCTTTCATACAAGCAGAGACTGGATCTGGAAAAGTCTTGGCATATCTA  
CTACCTATAGTCGAGCGAATATTAGCATTGAGTGAGAATGGCGTACAAAATA

>Bcin02g07770 (MLST9), partial sequence [organism=Botrytis cinerea, strain D06\_1\_30]

TACAGCTTTCCCTTTCCGTTTGGCATCTACAGTCATTTGCCATCCCTACACCATCACAACCTTGAGTCTCGGGCCGTTATCGATTCCGATGCCGT  
TGTAGGATTTGCCGAAAAGTGTCCAGTGGGACCGTAGGAAACAGTTTATGAGGCATATAAACCATTCCTTAAAGTCGTAAATGGATGCGTACCA  
TTCCCTGCCGTCGATGCATCGGGTAACACAGGGTATGTCTTATATCTTTCTCTTCCACACGATTGCTATTGAGTCTCTAACATATTTTAGTGG  
TGGTTTGTCAACAACTGGCAGTAGCAATGGTGGTTGACAGCAGCAGTACCGGTCAAGTATATGTTTCGAGGAGGACAAAGCGGATCAAACCTACGCC  
ATCATGTACTCTGGTAAAGTCTCTCTTAACTTCTCTTATAGATCCAACCTAACAAAATCTTAGGTACATGCCAAAGGACGAGCCCTCAACCG  
GTATTGGTCAACCGTACAGATTGGGAAGGTGTAATTTGCTGGCTCTCCAGCGCCACCGCCACAACCTGCCGACAACATCTTAGCCGTTTTGTCTTC  
CGCCACGGAGGCTGGGATTGTTCCACGGATGGCTATTCCCTTTCTGGTACCAGCCCTCTTATCAAGTACGAAAGTATCTGGCCCGTCGATCAC  
TCAATGGGTCTTACTAGTACTGTTGGTGGAAAACAACCTATGATTGCTTGGGAGTCTTTACCAACTGCTGCTCAAACCTGCTCTTGAGAACACCG  
ATTTCCGGTGTGCGAATGTTCCATTCATTTCCGGCTGTTTTTCACAGACAATCT

>Bcin04g02090 (MLST10), partial sequence [organism=Botrytis cinerea, strain D06\_1\_30]

CGGAGGATGATATGGCAAAGTCTATGATTACCAAAGCATTTGTAGGCATGAGTAGTAAACTGTCGAATATGACTATGAATGATGTTTACAAGCC  
CTACATCCATGTAAGAAAATGTAGAATAGAGAGATCAGTAACTGGAACATAATATCGTTTTGTAGGCTTTCAAGTTACTTACGCAGTTCAACCCAAT  
CACTACAGCTATTGCCGAATCCCCACTGTTTCAAATGGCCGCTCTCAGCAAATACCATCGAAAAGTACACACTGCTAGGCCCTTTCTTCAAGAATA  
TCTCCTCTGCAACAGGAAGTTACCAGGGAATACTTCACTGCGCCAAAGACGATAGATAGGCGACACATTTGCCACATCTCAAGATGCGTTACGAT  
TGACCTTACAAAACCATCAAAAAGATTTACTTGTATATCATCAACCACTTTGTTTCGAGCAAGTCCAATCGAAAAAGCAAACCCCTGGATTGGTT  
CGCCTACATTTGTGAATCAAAAATCACAAGCGTCGAGCACTTCAGGTAGACCCGAAAGAGTGTCTTCTGATGGCTTTATGCACAATGTCACCTGTC  
GTTCTAGATGGTCTTTGTGAGCCATTCATGGATACCACATTTCTGAAAATTTCAAGATTGATATGATTATCTAAGACGTGCGCCCTCGTGTAG  
ATATCAAGGACGAGACCAAGTTGAACGCTGACGAGAAGGCTTCTGAGAAGTATTTATGAGGACACTGTTCTGGCACCTTCAATTTTCATCTCTGA

GGTCTTCTTTCTCACATTGGCTGCTCATCATTATGGTAGTGAAGCTCTTAATGCCACGCATAAGAGTCTGGAGAAAGACATCAAATATATTCAA  
AAGCAATTGACTGCCGTTGAAGCA

>Bcin01g07220 (MLST1), partial sequence [organism=Botrytis cinerea, strain D08\_H\_8\_3]

ATGGCATATCTTGTCTTTTCGCATTATGCTTTGGAACGTGCTGGACAAGCTTGGGTTAGTGTCTGCGTGTAGAAGCACTAAAGAAGATTCT  
CGACAACCGAAGTCATGGTTTGAGGAATCCAGGAATTCACCTGGCCGGCTGAACGAAAGTTTTGGATAGGAACCTGAGGAAATGCGTAATCTC  
GTTGGCCGCTTTGCTGGTATTGTATTACAGCATTTTTTATGCTATTGATATCAATCATTGGGCTTTTTGTGAATACATGGAAACTGACATTAG  
TCTCGATGGCAACTGGGCCAGTTATATACGCTGTCCACAAAACATTC AATCGCGTGAGTGGAAAATGGGAAAACAAGTGCAACTACGCCCTCTGA  
AATGACCACTGGCATATTTTCAGAGACTTTCTCCAACATCAAAGTGGTTCGGGCTTTTACTCTGGAACTTACTTTGAGACAAAACACACAAA  
GCTACAGAAGAACTTTATAAAGTTGGACTAATACGAGCAAACTACTCGGGATTGCTGTGGGGATTGACAGATGCGATGTCATTTCTCATCCTG  
CAACTATCTTTTATTATGCCACGGTTCTCATTACCAAGAGAGAGATCAGTATCGCGACTGCACTACAGACTGTCAATCTTCTATTATTTGGTAT  
TTCTAATAGTACGAATATGCTGGCCATGATACCACAAAATCAACTCTTCTCGCGTTACAGCTACGCATATGCTTGCATTAGCCAATCTCGATTCA  
TCTTCTCCACGAAAATAAAGGAACCGAACGGCTTTTCGACAATCTTTCCAATCAAATTC AACCCTTTTCAATCACATACCCTACTCGTCTG  
AAAAACGAACGATATCATCTTTTCTCTTTCCCTGATTCTTAACCACTCAACAACGCACTTGTTCGGACCCCTCCGGCTCCGAAAATCTACAATAGC  
TGCTCTGCTCATTGGTCTCTATCCGCCAGATACTTCAACACCTCCACCCTGACATTCAAATCGCGTCTCCATAAGTAACTGTCACATTCCGTCT  
CTCCGGGCTTCTCTCTCACTCGTTCCACAAAATACCGATTCTATTTCCAGCTACCATTCTCCATAACATCATTATGGTCTCCAGAACTTCTC  
CTTGTGCTGGTCTTCCATCTGCTATTGCATCAGCAAAAAGATGCTGGGATCCATGAATTTATCACATCGCTTCCACAAGGTTATGATACTAT

>Bcin05g07690 (MLST2), partial sequence [organism=Botrytis cinerea, strain D08\_H\_8\_3]

ACCCTATCACCAAGTCTTTTCTGCACTTTCTCATCAAAAACGAACGAGAACATCATCAATAAAACTTTTGCTGAAGTAAATGGGTTTTATT  
TTGGCCAGGATGCCTTCTCTCTACGACAGCAAGCCTTCGATGATATGTTGTGGGTAGTTCTTGGCTGGCTGGATACTGTCAAATTCATTGATTT  
ACATTCTGAATTGCACTATTCAAACGACTCTCAGCCAGAAATGGTACGGACAACAATATAAACCTGCATTTGCACATCGAGCGGACTATTTTGG  
GAATTGGCTTTCACAAGGATGGGATACTACTCTCTGTGGTGGTGGGATGATATGGTCCACATACCTTACTCCATAACAAGAACGCAATTACCAATG  
AACTCTATATCGCAGCTTCGATATCGATGTACCTATATTTCCCGGAGATGACAATCAATCCCATTATGCTTTCCAACCTTCATATCCACC  
TCACGATCCGAAATATCTACAGGCAGCTGTTGATGCTTACAAATGGCTGAATGGTTCCAACATGACGGATTTACAAGGATTATATGTCGACGGG  
TACCATATCTCGAATCTTTCTGGCCGTGAAAACACCCATTGCGATTTAGAAATGAGATGGTATATAACCTACAATCAAGGTGTTTTGCTTACTG  
GACAACGTGGTTTTGTATGACGCAACCCGCCGACGATCATACCTTGTAGATGGCCACAACTCATCGCAATGTTATTAATGCCACAGGCTATGA  
CCTGAAACACAATGTTGTATCTCACCGCCACCCAAAGATGGTTCGCAATGGCAAAGTGGTTTTGGCTGGGTAGGAATGGAATACCTGGAAGAA  
GGATGCGATTCAAGTGCTTCGTGTTCTCAAAAATGGACAAAATTTCAAAGGCATATTTCTTTTCACTCATTGATTGCGTTCGTAGTATTGCCAG  
GGGAGCCTATTGCAAGGACGAAGGAAAGCTTAGAACTCGACAGAGTGTGGCATTCTGACAAATGCTCACAGTATACAAAAT

>Bcin06g01710 (MLST3), partial sequence [organism=Botrytis cinerea, strain D08\_H\_8\_3]

GGTGAGTCTGACTTTTTGTATTTGAGCGTTAAGATAGACTGATATACCAAGGCAATCACCTAATTTTCATGGCGTTCTTCCCTGCATCATCTAC  
CTACCCTGGAATGCTGGGAGAATTATACTCAGCAGCTTTTACAGCACCTGCTTTCAATTGGATCTGTTCCCTGCTGTGACAGAATTTGGAGACG  
GTTGTAATGGATTGGCTGGCCAAGCTTCTCAATCTCCAGACTGTTATTTGTCTTCGACTCATGGTGGTGGTGTATCCAAGGATCAGCCTCGG  
AAGCTATCGTTACCCTTATGGTTGCTGCCCAGATAAATATCTTCGTGAAACTACTGAAGGTCTGTCCGGCATTGAACTCGAGGATGCGATTGC  
ATATAAGAGGAGTAAGCTAGTTGCACTAGGAAGCGAAAATGGCACACAGCTCCACGCAGAAAGCAGCGCAAATAGCTGGCGTTAGATTCCGATCG  
ATTCCAGTACTCGCATCCAATGATTTCCGATGACGGGTGATGATTTAGAGAAGGTATTGAAAGAATGCAAATCTCAAGGATTGGAACCTTCT  
ATCTAACTTCGACTTTGGGAACAACATCTACATGCGCAGTTGACGACTTCGCATCTATTGCAACAGTACTTTCAAATATGCACCTCCAGATGT  
TGCAGGCGAGATCTGGGTTACGCTCGATGCTTATGCAAGTGCAGCTTTGGTTTTGCCCTGAATACCATCATCTAACATCGTCTTTCCAGCAT  
TTCCATTCTTCGATATGAACATGCACAAAATGGCTTCTGACAAAATTTCCGACGCTTCTTGTCTATATGTCAAGAAACGCAAAGATCTGATCGATG  
CACTGTCCATAACACCAAGTTATCTTCGCAACGAGTTTTTCAGAGAGTGGACTCGTAACCGACTATCGGGACTGGCAAATTCCTCTCGGAAGACG  
CTTCCGAAGCTTAAAGATTTGGTTTTGCTCTCAGAACCTAC

>Bcin09g03030 (MLST4), partial sequence [organism=Botrytis cinerea, strain D08\_H\_8\_3]

ACCCTTCAACCCACCGCAGCTCTATACCGAAAGCGAGTATCTTACCAATTTCTCTTCCACCTGCGACTTTAAGACCATTGGCTTTCCGCACT  
TTCACAAAAAAGCATAGTTTAAACATTTGACGTCGTCGGCATTACAAGTGTGGCTACTTTTATTTGGAAAAGTATTGTGGGACAGGATGGAGGGAAG  
AAGGACTGGCAGAGAGAGTCTTGGAGGAGGTGCGCAAGAGTTGGAAGAATAGGAGTGGCGGTGTCAATTTGTCGAGGGCGAGGGAACGGAATTGAA  
GGAGATTCTGAAAGCTTTGGAAGGGAATATGAGAGGTGGAAGGATAGTATAGGAAGAGAGCTAAGCCGGCAGAATAGTTTAGTACTGGGATCA  
TCACAATATGGAGAGGTCAATCATACAAGACTTTGGGCTACGGCCAGGGAATATAACCAGAGAGGATAGTCAAGTCAAGTTTGGGAATGTCAACGT  
TGGAGGTCAATGACGAAGAAGATGAGGATGGCCTGATGGATCCAAGAAGGTGGTTAAAAGTCAATGATGCATTTGAGCAACCTCGACTGGTGT  
CAATGTTGCTAAAAAGCACTTTGATAGGTATGTTTCAATGATAAAAATTTTATCTGAATCGACTAATCAGTACAGAGATGCCTCCAAACCTTCA  
TTGTTCCACCTGCGTCTCATAAAAACCTCTCTTCCAAAACCGCTATAATGTTATCCATCAACGTCTCTTTCGCAATGAATCTTTTCAAACGC  
CCGCTTTTCAAGGTGGCAAATCTTCCCTTCAACGCAGCAGCTCCGCCATTACCACACAACAACAATCATACAAAATTAACGCCGATAGCTAATCT  
TCTCGGTGCGAATCGCAGCTCTCATATGCTTCTCGGTCTCCTCAGTATTTCAACCACTGGTACCCTCGCCATCAATGACCTGACGGGCAGTATC  
GCTCTCGATCTTACACACGCAGCAGCCATT

>Bcin11g01310 (MLST5), partial sequence [organism=Botrytis cinerea, strain D08\_H\_8\_3]  
TGGGCTGACATGGACCTCATGTGGAACCGGCGTAGAATGCGCAACGCTTGAAGTTCGCTCGAATATGGCGATGCAACGTCAACGGCAAGAGCC  
AGTGTTCGCTTACTCGTTATCCTGCCACTGTTGCCGCGAGCAAGAAGCTCGGGTCTCTTTGATAAACCCCGTGGGCCCGGTGCCCTCTGGTG  
TTGGCTTTGTGCAGTCTGGAGCCGGTGCCGCCGCTCTCGACACTGAGTGGTGGATTGTACGATATCATCGGATGGGATCCACGTGGAACCGGTGC  
TTCGGCTCCTATTTTGAATGTTTTGCAAAATGCCAGTGCAGGATGATTTTTAACAACGCGTTTCCATCTGCTCCGAATCTCTGGCTCGGACAA  
TTTGCGAATGCCAGCGCAAATCTGCTGTTAGCTCTGCTATCACATCCTTTGACACTTCTGTGCTGCTCTTGCAAAAAGCTTGGTGGCTCAGA  
AATCTCCCCTCTTTACACCTCAACAGCAGCATATGTTGCTCGAGACGTGGCAGCGATAGTCGATGCATTGGATGGGACCTCTGCAAAAACCTAA  
CTACTGGGGTTTTCTCATATGGAACATCTTCTAGCTGAGTTTATCCAACTTTCCAGGCCGCGTGGGAAGAGTTCTTGGCGATGGTGTTC  
GACGCAAAGGCAAATGCACTCACATACGTTAGCCAACTTCCCAACGATCAACTCAGTGTTCGTGCTTCGTTGAACGATTTTGCAGCTTTCTGCA  
CCACCGCCGGTAGTAAAGGTTGCTCTTTTGGCACCGCCCTACTGGAACCACAGGTACTGTTGCTACCAGACTGGACAACATAATGAAGGATAT  
GTTCTCAATCCTATTGTTGCTTCGGGCTTAAGCATCAG

>Bcin15g03910 (MLST6), partial sequence [organism=Botrytis cinerea, strain D08\_H\_8\_3]  
GGTGAGTCTGACTTTTGTATTTGAGCGTTAAGATAGACTGATATACCAAGGCAATCACCTAATTTTCATGGCGTTCTTCCCTGCATCATCTAC  
CTACCCTGGAATGCTGGGAGAATTATACTCAGCAGCTTTCACAGCACCTGCTTTCAATTGGATCTGTTCCCTGCTGTGACAGAATTGGAGACG  
GTTGTAATGGATTGGCTGGCCAAGCTTCTCAATCTCCAGACTGTTATTTGTCTTCGACTCATGGTGGTGGTGTGCATCCAAGGATCAGCCTCGG  
AAGCTATCGTTACCGTTATGGTTGCTGCCCGGATAAATATCTTCGTGAACTACTGAAGGTCTGTCCGGCATTGAACTCGAGGATGCGATTGC  
ATATAAGAGGAGTAAGCTAGTTGCACTAGGAAGCGAAAATGGCACACAGCTCCACGCAGAAAGCAGCGCAAATAGCTGGCGTTAGATTCGGATCG  
ATTCCAGTACTCGCATCCAATGATTTCCGATGACGGGTGATGATTTAGAGAAGGTATGAAAGAATGCAAATCTCAAGGATTTGGAACCCCTCT  
ATCTAACTTCGACTTTGGGAACAACATCTACATGCGCAGTTGACGACTTCGCATCTATTGCAACAGTACTTTCAAAAATATGCACCTCCAGATGT  
TGCAGGCGAGATCTGGGTTACGTCGATGCTGCTTATGCAAGTGCAGCTTTGGTTTTGCCCTGAATACCATCATCTAACATCGTCTTTCCAGCAT  
TTCCATTCCCTTCGATATGAACATGCACAAAATGGCTTCTGACAAAATTCGACGCTTCTTGTCTATATGTCAAGAAACGCAAAGATCTGATCGATG  
CACTGTCCATAACACCAAGTTATCTTCGCAACGAGTTTTCAGAGAGTGGACTCGTAACCGACTATCGGGACTGGCAAATTCCTCTCGGAAGACG  
CTTCCGAAGCTTAAAGATTTGGTTTGTCTCAGAACCTAC

>Bcin16g03460 (MLST7), partial sequence [organism=Botrytis cinerea, strain D08\_H\_8\_3]  
ATGAACCTCTTGATTTGAACTCTTCATTAATTGCAAGTGTGAACCCCTATTCTGCCAGAGGATAGTTACAAGACGTATATCATTAGTCGAGA  
ACCACCTCATGATATATATTGACGGATTTTGAAGCGAATGAAAGTAAACATTTGGTTGATGTTAGGTGTGTTATTTATTTCTGATGAAATGAAC  
AAGAGAGACTGATGAGATAGTGAGCCGCTTTATGAACCGTCAACTGTTTCTCACGGACAGGAAGTTACCATTGATCCTTCAGTTCCGAATTCCTG  
AAGTGGCGGTTTTAGAGAGGGATGAGGTGGTTCAGGTGATTTGAGCATAGAGCGAGGGCATTTTCAGGGGTGGAGGGGCGAGATGGGGATTGAGAA  
GTTGAGGACGCAGAGGTATGGCGTTGGAGGACATTTATGGGATGCATTTGTAAGTTTTGGGGATTGACGAAGGCTTCTGTCTATTTTCTACCAG  
TACGGATCTTGAAAAGAAAGATAGCATGAACACGAGGGCTAATAACTAGGAAAATAGCGATTGGAGCGGAGGTAACCGTGGCATAGACCGATTTAG  
TACTTTTCATGGTCTATGTGACGATATCCTCTGATATCGAAGGTGGAGGAACGGAAATTTCCACGATTTGTGGGACCAAAGGAGGAAGGTGGGAG  
GACTTCTTGAAACTACGGAAGCATTGGATCCAAGAACTGGAGAAAATGTAACAGTAGAAGGGGTGACATTCAAACCAATCAAGGGAAATGCCG  
TATTCTGGGAAAATACTGACAACAACGGGAGGGGCTATGAT

>Bcin12g03020 (MLST8), partial sequence [organism=Botrytis cinerea, strain D08\_H\_8\_3]  
CGATTGGCTGCGAAGAAAACGCGCAGCACCGAGTACCCAAAAGCACGAATAAACCATCGGCAAGGGAAATATTCTCTGAACCACAACATGACA  
CGAGCGCGAAGAGTATATCGGGCGAGAAGCTTCATCAAGAGCACCAAAGCGACAACGAGTGCATGATAAATTATAACTCTTACGGTGGAAAGAAA  
TGAAAATACAGCAGCTTATGCTTCCGGGAAAACCTCCATCTGGAAAGTATAAATGTTGGTGGAGGTAGGAAGACCCTTTTCAAGAAGAACCACGA  
ACGGCATTGTGCTGGCAAGTTGCCCCCTGGAAGTATCAACATTTGGTGGAAAGAAGGCTACTCAAATCGAGGACGAGGGTAGAGCAGCTTATG  
CTTCCGAAAATTCCTCCAGGAAGTATAAATCTGGCGCAAAGAAGGCGATTTTCATTTCAAAGATGAAACGAGACCAGGCTTATGTCTCCGAAA  
GCTTCCACATGGTAGTATCGACGGTATGCGAAAACCTGAAATGGCTGCCGTCACCCGCGAAAATGCTGAGGGTGGGAGGAAACCAGGCCAGGTT  
GTCTCTTCTCTATTACATTTCAATCCTACTTCAAAGAAAACCTTTTGGATGAACCCGAAAGAACAAAGCGGAACCGGCAAACCATCCAATGCGCCTT  
TGACAGAGGAAAATGGCGACTTTCACCAATCTAGGGTTATCGAGAAGGCTTGACAGCCCATCTATCGACTAAACTCGATATGAAAGCTCCGACCGC  
CATTCAAAAAGCATCTGTACAGCAGTTGGTATCGGACGATAGCGATGCTTTCATACAAGCAGAGACTGGATCTGGAAAACCTTTGGCATATCTA  
CTACCTATAGTCGAGCGAATATTAGCATTTGAGTGAGAATGGCGTACAAA

>Bcin02g07770 (MLST9), partial sequence [organism=Botrytis cinerea, strain D08\_H\_8\_3]  
CAGCTTTCCTTTTCGGTCTTGGCATCTACAGTCAATGCCATCCCTACACCATCACAACTTGAGTCTCGGGCCGTTATCGATTCCGATGCCGTTG  
TAGGATTTGCCGAAAACGTTCCAGTGGGACCGTAGGAACAGTTTATGAGGCATATAAACCATTCCTTAAAGTCGTAAATGGATGCGTACCATT  
CCCTGCCGTCGATGCATCGGGTAACACAGGGTATGTCTTATATCTTTCTCTTCCACACGATTGCTATTGAGTCTCTAACATATTTTAGTGGTG  
GTTTGTACCAACTGGCAGTAGCAATGGTGGTTGCAGCAGCAGTACCGGTCAAGTATATGTTTCGAGGAGGACAAAGCGGATCAAACCTACGCCAT  
CATGTACTCCTGGTAAGTTCTCTCTAAACTTCTCCTTATAGATCCAACCTAACAAAATCTTAGGTACATGCCAAAGGACGAGCCCTCAACCGGT  
ATTGGTCAACCGTACGATTGGGAAGGTGTAATTTGCTGGCTCTCCAGCGCCACCGCCACAACCTGCCGACAACATCTTAGCCGTTTGTCTTCCG  
CCCACGGAGGCTGGGATTGTTCCACGGATGGCTATTTCCCTTTCTGGTACCAGCCCTCTTATCAAGTACGAAAAGTATCTGGCCCGTCGATCACCTC  
AATGGGTCTTACTAGTACTGTTGGTGGAAAACAACCTATGATTTGCTGGGAGTCTTTACCAACTGCTGCTCAAACCTGCTCTTGAGAACACCGAT

TTTCGGTGTCTGCGAATGTTCCATTTCATTCCGGCTGTTTTTCACAGACAATCT

>Bcin04g02090 (MLST10), partial sequence [organism=Botrytis cinerea, strain D08\_H\_8\_3]  
CGGAGGATGATATGGCAAAGTCTATGATTACCAAAGCATTTGTAGGCATGAGTAGTAAACTGTGCGAATATGACTATGAATGATGTTTTACAAGCC  
CTACATCCATGTAAGAAAATGTAGAATAGAGAGATCAGTAACTGGAACATAATATCGTTTTGTAGGCTTTCAAGTTACTTACGCAGTTCAACCCAAT  
CACTACAGCTATTGCCGAATCCCCTACTGTTTCAAGTGGCTGTCTCAGCAAATACCATCGAAAAGTACACACTGCTAGGCCCTTTCTTTCAGAATA  
TCTCCTCTGCAACAGGAAGTTACCAGGGAATACTTCAGTGCGCCAAAAGACGATAGATAGGCGACACATTTGCCACATCTCAAGATGCGTTACGAT  
TGACCTTACAAAACCCATCAAAAAAGATTTACTTGTATATCATCAACCACTTTGTTCGAGCAAGTCCAATCGAAAAAGCAAAACCCCTGGATTGGTT  
CGTCTACATTGTGAATCAAAAATCACAAGCGTCGAGCACTTCAGGTAGACCCGAAAGAAGTGTCTTCTGATGGCTTTATGCACAATGTCACCTGTC  
GTTCTAGATGGTCTTTGTGAGCCATTCATGGATACCACATTTCTCGAAAATTTTCGAAGATTGATATTGATTATCTAAGACGTGCGCCCTCGTGTAG  
ATATCAAGGACGAGACCAAGTTGAACGCTGACGAGAAAGGCTTCTGAGAAAGTATTATGAGGACACTGTTCTGGCACCTTCTAATTTTCATCTCTGA  
GGTCTTCTTCCCTCACATTGGCTGCTCATCATTATGGTAGTGAAGCTCTTAATGCCACGCATAAGAGTCTGGAGAAAAGACATCAAATATATTTCAA  
AAGCAATTGACTGCCGTTGAAGCA

>Bcin01g07220 (MLST1), partial sequence [organism=Botrytis cinerea, strain D09\_K\_2\_3]  
ATGGCATATCTTGTCTTTTCGCATTATGCTTTTGGAACGTGCTGGACAAGCTTGGGTTAGTGTCTCTGCGTGTAGAAGCACTAAAGAAGATTCT  
CGACAACCGAAGTCATGGTTTGGAGAAATCCAGGAATTCACCTGGCCGGTTGAACGAAGTTTTGGATAGGAACTCTGAGGAAATGCGTAATCTT  
GTTGGCCGCTTTGCTGGTATTGTATTCACAGCATTTTTTCATGCTATTGATATCAATCATTTGGGCTTTTCGTGAATACATGGAACCTGACATTAG  
TCTCGATGGCAACTGGGCCAGTTATATACGCTGTCAACAAAACGTTCAATCGCGTGTAGTAAAAATGGGAAAACAAGTGAACCTACGCCCTCTGA  
AATGACCACTGGCATATTTTTTCAGAGACTTTCTCCAACATCAAAGTGGTTTCGGGCTTTTACTCTGGAACCTTACTTTGAGACAAAACACACAAA  
GCTACAGAAGAACTTTATAAAGTTGGACTAATACGAGCAAACCTACTCGGGATTGCTGTGGGGATTGACAGATGCGATGTCATTTCTTTCATCCTG  
CAACTATCTTTTTATTATGCCACGGTTCTCATTACCAAGAGAGAGATCAGTATCGCGACTGCACCTACAGACTGTCAATCTTCTATTATTTGGTAT  
TTCTAATAGTACGAATATGCTGGCCATGATACCACAAAATCAACTCTTCTCGCGTTACAGCTACGCATATGCTTGCATTAGCCAATCTCGATTCA  
TCTTCTCCACGAAAATAAAGGAACCGAACGGCTTTTCGACAATCTTTCCAATCAAATTCACCGTCTTTTCATTACATACCCCTACTCGTCCCG  
AAAAACGAACGATATCATCTTTTCTCTTTCCCTGATTCCTAACTCAACAACCTGCACCTTGTTCGGACCCCTCCGGCTCCGAAAAATCTACAATAGC  
TGCTCTGCTCATTGGTCTCTATCCGCCAGATACTTCAACACCTTCAACCGTTGACATTCATCGCGTCTCCATAAGTAACTGTCACATTTCCGTCT  
CTCCGGGCTTCTCTCTCACTCGTTCCACAAAATACCGATTCTATTTCCAGTACCATTCTCCATAACATCATTATGGTCTCCAGAACTTCTCTC  
CTTGTGCTAGTCTTCCATCTGCTATTGCATCAGCAAAAAGATGCTGGGATCCATGAATTTATCACATCGCTTCCACAAGGTTATGATACTAT

>Bcin05g07690 (MLST2), partial sequence [organism=Botrytis cinerea, strain D09\_K\_2\_3]  
TCACCACTATACCAAGTCTTTTCTGCACTTTCTCTCATCAAAAACGAACGAGAACATCATCAATAAATACTTTGCTGAAGTAATTGGGTTTTTA  
TTTTGGCCAGGATGCCTTCTCTCTACGACAGCAAGCCTTCGATGATATGTTGTGGGTAGTTCTTGGCTGGCTGGATACTGTCAAATTTATTTGAT  
TTACATTCTGAATTGCACTATTCAAACGACTCTCAGCCAGAAATGGTACGGACAACAATATAAACCTGCATTTGCACATCGAGCGCGACTATTTT  
GGGAATTGGCTTCAACAAGGATGGGATACTACTCTCTGTGGTGGTGGGATGATATGGTACCATACTTACTCCATAACAAGAACGCAATTACCAA  
TGAACTCTATATCGCAGCTTCGATATCGATGTACCTATATTTCCCCGGAGATGACAATCAATCCCCATTTATGCTTTCCAACCCCTTCATATCCA  
CCTCACGATCCGAAATATCTACAGGCAGCTGTTGATGCTTACAAATGGCTGAATGGTTCCAACATGACGGATTTACAAGGATTTATATGTCGACG  
GGTACCATATCTCGAATCTTTCTGGCGGTGAAAAACCCCATTTGCGATTCTAGAAATGAGATGGTATATACCTACAATCAAGGTGTTTTGCTTAC  
CGGACAACGTGGTTTGTATGACGCAACCGCCGACGATCATACCTTGTAGATGGCCACAAACTCATCGCGAATGTTATTAATGCCACAGGCTAT  
GACCTGAAACACAATGTTGTCATCTCACCGCCACCCAAAGATGGTTCCGCATTGGCAAAGTGGTTTTGGCTGGGTAGGAATGGAATACTGGAAG  
AAGGATGCGATTCAAGTGCTTTCGTGTTCTCAAAAATGGACAAAATTTCAAAGGCATATTTCTTTTCATCACTTGAATTGCGTTCTGTAGTGAATTTGCC  
AGGGGAGCCTATTGCGAGGACGAAGGAAAGCTTAGAACTCGACAGAGTGTGGCATTCTGACAAAATGCTCACAGTATACAAAAT

>Bcin06g01710 (MLST3), partial sequence [organism=Botrytis cinerea, strain D09\_K\_2\_3]  
GTGAGTCTGACTTTTTGTATTTGAGCGTTAAGATAGACACTGATATACCAAGGCAATCACCTAATTTTCATGGCGTTCTTCCCTGCATCATCTACC  
TACCCTGGAATGCTGGGAGAATTATACTCAGCAGCTTTTCACAGCACCTGCTTTCAATTGGATCTGTTCCCTGCTGTGACAGAATTGGAGACGG  
TTGTAATGGATTGGCTGGCCAAGCTTCTCAATCTCCAGACTGTTATTTGCTTTCGACTCATGGTGGTGGTGTATCCAAGGATCAGCTCGGA  
AGCTATCGTTACCGTTATGGTTGCTGCCCGGATAAATATCTTCGTGAAACTACTGAAGGTCGTGCGGCATTTGAACCTCGAGGATGCGATTGCA  
TATAAGAGGAGTAAGCTAGTTGCACTAGGAAGCGAAATGGCACACAGCTCCACGCGAGAAAGCAGCGCAAATAGCTGGCGTTAGATTCCGATCGA  
TTCCAGTACTCGCATCCAATGATTTTCGCCATGACGGGTGATGATTTAGAGAAGGTAATTGAAAGAATGCAAATCTCAAGGATTGGAACCCCTTCTA  
TCTAACTTCGACTTTGGGAACAACATCTACATGCGCAGTTGACGACTTCGCATCTATTGCAACAGTACTTTCAAATAATGCACCTCCAGATGTT  
GCAGGCGAGATCTGGGTTACGTCGATGCTGCTTATGCAGGTGCAGCTTTGGTTTGGCCCTGAATACCATCATCTAACATCGTCTTTCCAGCAT  
TCCATTCTTCGATATGAACATGCACAAAATGGCTTCTGACAAAATTTTCGACGCTTCTTGTCTATATGTCAAGAAACGCAAAGATCTGATCGATGC  
ACTGTCCATAACACCAAGTTATCTTCGCAACGAGTTTTTCAGAGAGTGGACTCGTAACCGACTATCGGGACTGGCAAATTCCTCTCGGAAGACGC  
TTCCGAAGCTTAAAGATTTGGTTTGTCTCAGAACCTAC

>Bcin09g03030 (MLST4), partial sequence [organism=Botrytis cinerea, strain D09\_K\_2\_3]  
GACCTTCAACCCACCGCAGCTCCTATACCGAAAGCGAGTATCTTACCAATTTCTCTTCCACCTGCGACTTTAAGACCATTGGCTTTCCGCAC



```
TTTCACAAAAAGCATAGTTTAAACATTGACGTCGTCGGCATTACAAGTGTGGCTACTTTTATTGGAAAGCATTGTGGGACAGGATGGAGGGAA
GAAGGACTGGCAGAGAGAGTCTTGAGGAGGTCGCCAAGAGTTGGAAGAATAGGAGTGGCGGTGTCATTGTGCGAGGGCGAGGGAACGGAATTGA
AGGAGATTCTGAAAAGCTTTGGAAGGGAATATGAGTGGTGGAAAGGATAGTCATAGGAAGAGAGCTAAGCCGACAGAATAGTTTAGTACTGGGATC
ATCACAATATGGAGAGGTCAATCATACAAGACTTGGGCTACGGCCAGGGAATATACCCAGAGAGGATAGTCAGTCAAGTTTGGGAATGTCAACG
TTGGAGGTCAATGACGAGGAAGATGAGGATGGCTGATGGATCCAAGAAGGTGGTCAAAAGTCATTGATGCATTTGAGCAACCTCGACTGGTGT
ACAATGTTGCTAAAAAGCACTTTGATAGGTATGTTTCAATGATAAAATTTTATCTGAATCGACTAACACAGTACAGAGATACCTCCAAACCTTC
ATTGTTCCACCTGCGTCTCATAAAAACACTCTCTTCCAAAACCCTATAATGTTATCCATCAACGTCCTCTTCGCAATGAATCTTTTCAAACG
CCCGCTTTTCAAGGTGGCAAATCTTCCCTTCAACGCAGCACGTCGCCCATTACCACACAACAACAATCATACAAATTAACGCCGATAGCTAATC
TTCTCGGTCGCAATCGCAGCTCTCATATGCTTCTCGGTCTCCTCAGTATTTACCCACTGGTACCCTCGCCATCAATGACCTGACGGGCAGTAT
CGCTCTCGATCTTACACACGCAGCAGCCATTC
```

```
>Bcin11g01310 (MLST5), partial sequence [organism=Botrytis cinerea, strain D09_K_2_3]
ACTGACATGGACCTCATGTGGAACCGGCTAGAATGCGCAACGCTTGAAGTCCGCTCGAATATGGCGATGCAACGTCAACGGCAAAGCCAGT
GTTGCGCTTGCTCGTTATCTGCCACTGTTGCCGCGAGCAAGAAGCTCGGGTCTCTCTTGATAAACCCCGGTGGACCCGGTGCCTCTGGTGTG
GCTTTGTGCACTGAGGAGCCGGTGCCCGCTCTCGACACTGAGTGGTGGATTGTACGATATCATCGGATGGGATCCACGTGGAACCGGTGCTTC
GGCTCCTATTTTGAATGTTTTGCAAATGCCAGTGGGAGTATGATTTTAAACAACGCTTTCCATCTGCTCCGAATCTCTGGCTCGGACAATTT
GCGAATGCCAGCGCAAATCTGCTGTTAGCTCTGCTATCACATCCTTTGACACTTCTGTGCTGCTCTTGCAAAGCTTGGCTGGCTCAGAAAT
CTCCCGCTCTTTACACCTCAACAGCAGCATATGTTGCTCGAGACATGGCAGCGATAGTCGATGCATGGATGGGACCTCTGCAAACCTTAAC
CTGGGGTTTCTCATATGGAACATCTTCCCTAGCTGAGTTTATCCAACTTTCCAGGCGCGTGGGAAGAGTTCTTGCCGATGGTGTTCGCAC
GCAAAGGCAAATGCACTCACATACGTTAGCCAACCTTCCCAACGATCAACTCAGTGTTCGTGCTTCTGTTGAACGATTTTGCAGCTTTCTGCACCA
CCGCCGGTAGTAAAGGTTGCTCTTTTGCACC GCCCTACTGGAACCACAGGTAAGTGTGCTACCAGACTGTACAACATAATGAAGGATATGTT
CCTCAATCCTATTGTTGCTTCGGGCTTAAGCATCAG
```

```
>Bcin15g03910 (MLST6), partial sequence [organism=Botrytis cinerea, strain D09_K_2_3]
GCCAAAACACAAAATCATCCAACGATGAAGATGATACTCCACTTCCCTTGATTATTTGGCATGGACTCGGCGATAAATTACAAAGCGGATGGTCT
TGCGCAAGTTGGAAAAGTAGCTGAAGCTATTCATCCTGGGACTTTTGTCTACAATATTCATGTAGATGAGGATGCATCTGCAGATAGGACAGCT
ACCTTCTTTGAAAATCTCACTCGTGAGTACATCCCTATTTTCCCTTTAAATACCATACTAACTCTCTTACCAAGTTCAAAATCGAAAAGGCTCTG
CGAAGACCTCGCCTCCATCCTATTTCTCTTACC GCGCCCGCTCGACGCAATTTGGATTCTCCCAAGGCGGCCAATTTCTTGCGCGGTTACATA
TCCCGCTGCAATGCTCCACCCATCCGCTCTCTCTGACCTTCGGTTCCCAACACAACGGCATTTCTGCTTCCAAGCCTGTGGTCTCGCGATT
TCCTCTGTGCGGGTGTCAAACCCCTTTTGCATCCAACACCTGGTCAACCTTTGTCCAATCTCGTCTCGTACCCGCTCAATACTTCAGAGATCC
GGAAAACCTAGACTCTTACCTTGAATATTTCAATTTCTTGGCGACATCAATAATGAGCGGTTCTCAAGAACCAAACATATAAAATCCAACATG
GAAAAATTGGAACGATTCGTAATGTATGCTTTGAAAGACGATACAACCTGTCATCCCTAAGGAAAGTGGATGGTGGGCTGAAGTCAACGGCACGG
AAGTTACACCACTGAAAAGAAAGAGCCATTTATAAAAGAAAGATTGGCTAGGTTTAAAGACATTTGGATGAGGCCGAAAATTAGTTTTCGAAACCAT
TCCAGGGGGACATATGACGTTAGGAGAGGAGATGCTAGAGAAGGCTTTCAAAGAGTATTTTGGTCCAGCAGGGAAGAAATTTGGG
```

```
>Bcin16g03460 (MLST7), partial sequence [organism=Botrytis cinerea, strain D09_K_2_3]
CATGAACCTCTTGATTTGAACTCTTCATTAATTGCAAGTGATGAACCCCTATTTCTGCCAGAGGATAGTTACAAGACGTATATCATTAGTTCGAG
AACCCTCATGATATATATTGACGGGTTTTTGAAGCGAATGAAAGTAAACATTTGGTTGATGTTAGGTGTGTTATTTATTTCTGATGAAATGAA
CAAGAGAGACTGATGAGATAGTGAAGCGCTTTATGAACCGTCAACTGTTTCTCACGGACAGGAAGTTACCATTGATCCTTCAGTTCCGGAATCT
GAAGTGGCGGTTTTAGAGAGGGATGAGGTGGTCAAGTGTATTGAGCATAGAGCGAGGGCATTTTCAGGGGTGGAGGGGCGAGATGGGATTTAGAA
GTTGAGGACGCAGAGGTATGGGGTTGGAGGACATTATGGGATGCATTTGTAAGTTTTGGGGGATTGACGAAGGCTTCTGTCTATTTTCTATCAG
CACGGATCTTGAAAAGAAAGATAGCATGAACACGCGGGCTAATAACTAGGAAATAGCGATTGGAGCGGAGGTAACGTTGGCATAGACCGATTTTA
GTACTTTTATGTTGCTATGTCGACGTATCTCTGATATCGAAGGTGGAGGAACGGAAATTTCCACGTATCGTGGGACCAAAGGAGGAAGGTGGGAG
GACTTCTTGGAAAACCTACGGAAGCATTTGGATCCAAGAAGTGGAGAAAATGTAACAGTGAAGGGTGACATTTCAAACCAATCAAGGGAAATGCCGTA
TTCTGGGAAAATACTGACAACAACGGGAGGGGCTATGAT
```

```
>Bcin12g03020 (MLST8), partial sequence [organism=Botrytis cinerea, strain D09_K_2_3]
CGATTGGCTGCGAAGAAAAGTGCAGCAGCACCAGTCAACAAAAGCACGAATAAACCATCGGCAAGGGAATATTTCTCTGAACCACAACATGACA
CGAGCGCGAAGAGTATATCGGGCGAGAAGCTTCATCAAGAGCACCAAAGCGACAACGATCGATGATAAATTATAACTCTTACGGTGGAAAGAAA
TGAAAATACAGCAGCTTATGCTTCCGGGAAAACCTCCATCTGGAAGTATAAAATGTTGGTGGAGGTAGGAAGACCCTTTTCAAGAAGAACCCTCGA
ACGGCATTTGTGCTGGCAAAGTTGCCCCCTGGAAGTATCAACATTTGGTGGAAAAGAGGCTACCCAAATCGAGGACGAGGGTAGAGCAGCTTATG
CTTCCGAAAATTTGCCCCAGGAAGTATAAACTCTGGCGCAAAGAAGGCGATTTTCAATCCAAGATGAAACGAGACCGGCTTATGTCTCCGAAA
GCTTCCACATGGTAGTATCGACGGTATGCGAAACCGTAAAATGGCTGCCGTCCACC GCGAAAATGCTGAGGGTGGGAGGAAACCAGGCCAGGTT
GTCTCTTCTCTATTTACATTTCAATCCTACTTCAAAGAAAACCTTTGATGAACCAGAAAGCAAGCGGAACCGGCAAACCATCCAATGCGCCTT
TGACAGAGGAAAATGGCGACTTTACCAATCTAGGGCTATCGAGAAGGCTTGCAGCCCATCTATCGACTAAACTCGATATGAAAGCCCCGACGGC
CATTCAAAGAACATCTGTGACGAGTTGGTATCGGACGATAGCGATGCTTTCATACAAGCAGAGACTGGATCTGGAAAACCTTTGGCATATCTA
CTACCTATAGTCGAGCGAATATTAGCATTTAGTGTGAGTGGGCTACAAAATA
```

>Bcin02g07770 (MLST9), partial sequence [organism=Botrytis cinerea, strain D09\_K\_2\_3]  
CAGCTTTCCCTTTTCGGTCTTGGCATCTACAGTCATTGCCATCCCTACACCATCACAACTTGAGTCTCGGGCCGTTATCGATTCCGATGCCGTTG  
TAGGATTTGCCGAAACTGTTCCAGTGGGACCGTAGGAACAGTTTATGAGGCATATAAACCATTCCTTAAAGTCGTAAATGGATGCGTACCATT  
CCCTGCCGTCGATGCATCGGGTAACACAGGGTATGTCTTATATCTTTCTCTTCCACACGATTGCTATTGAGTCTCTAACATATTTTAGTGGTG  
GTTTGTACCAACTGGCAGTAGCAATGGTGGTTCGAGCAGCAGTACCGGTCAAGTATATGTTTCGAGGAGGACAAAGCGGATCAAACACGCCAT  
CATGTACTCTGGTAAAGTTCTCTCTAAACTTCTCCTTATAGATCCAACCTAACAAAACTTTAGGTACATGCCAAAGGACGAGCCCTCAACCGGT  
ATTGGTCAACGTCACGATTGGGAAGGTGTAATTGTCTGGCTCTCCAGCGCCACCGCCACAACCTGCCGACAACATCTTAGCCGTTTGTCTTCCG  
CCCACGGAGGCTGGGATTGTTCCACGGATGGCTATTCCCTTTCTGGTACCAGCCCTTTATCAAGTACGAAAGTATCTGGCCCGTCGATCACTC  
AATGGGTCTTACTAGTACTGTTGGTGGAAAACAACCTATGATTGCTTGGGAGTCTTTACCAACTGCTGCTCAAACCTGCTCTTGAGAACACCGAT  
TTCGGTGTGCGAATGTTCCATTTCATTCCGGCTGTTTTTCACAGACAATCT

>Bcin04g02090 (MLST10), partial sequence [organism=Botrytis cinerea, strain D09\_K\_2\_3]  
CGGAGGATGATATGGCAAAGTCTATGATTACCAAAGCATTTGTAGGCATGAGTAGTAAACTGTCGAATATGACTATGAATGATGTTTACAAGCC  
CTACATCCATGTAAGAAAATGTAGAATAGAGAGATCAGTAACTGGAACATAATATCGTTTTGTAGGCTTTCAGTTACTTACGCAGTTCAACCCAA  
CACTACAGCTATTGCCGAATCCCCACTGTTCAAATGGCCGTCTCAGCAAATACCATCGAAAAGTACACACTGCTAGGCCCTTTCTTTCAGAATA  
TCTCCTCTGCAACAGGAAGTTACCAGGGAATACTTCAGTGCGCCAAAGACGATAGATAGGCGACACATTGCCACATCTCAAGATGCGTTACGAT  
TGACCTTACAAAACCCATCAAAAAAGATTTACTTGTATATCATCAACCACTTTGTTCGAGCAAGTCCAATCGCAAAAAGCAAAAACCCCTGGATTGGTT  
CGCTACATTGTGAATCAAAAATCACAAGCGTCGAGCACTTCAGGTAGACCCGAAAGAAGTGTCTTCTGATGGCTTTATGCACAATGTCACCTGTC  
GTTCTAGATGGTCTTTGTGAGCCATTTCATGGATACCACATTTCTCGAAAATTTCAAGATTGATATTGATTATCTAAGACGTGCGCCTCGTGTAG  
ATATCAAGGACGAGACCAAGTTGAACGCTGACGAGAAGGCTTCTGAGAAGTATTATGAGGACACTGTTCTTGGCACCTTCAATTTTCATCTCTGA  
GGTCTTCTTTCTCACATTGGCTGCTCATCATTATGGTAGTGAAGCTCTTAATGCCACGCATAAGAGTCTGGAGAAAGACATCAAATACATTCAA  
AAGCAATTGACTGCCGTTGAAGCA

>Bcin01g07220 (MLST1), partial sequence [organism=Botrytis cinerea, strain D09\_K\_4\_1]  
ATGGCATATCTTGTCTTTCTTTTCGCATTATGCTTTGGAACTGCTGGACAAGCTTGGGTTAGTGTCTGCGTGTAGAAGCACTAAAGAAGATTCT  
CGACAACCGAAGTCATGGTTTTGAGGAATCCAGGAATTCACCTGCCGTTGAACGAAGTTTTGGATAGGAACCTGAGGAAATGCGTAATCTCG  
TTGGCCGCTTTGCTGGTATTGTATTCACAGCATTTTTTATGCTATTGATATCAATCATTTGGGCTTTTCGTGAATACATGGAACTGACATTAGTC  
TCAATGGCGACTGGGCCAGTTATATACGCTGTCAACAAAACGTTCAATCGCGTGAGTGGAAAATGGGAAACAAGTGAACCTACGCATCTGAAAT  
GACCACTGGCATATTTTTCAGAGACTTTCTCCAACATCAAAGTGGTTCGGGCTTTTACCTGGAACCTTACTTTGAGACAAAACACACCAAAGCTAC  
AGAAGAACTCTATAAAATTTGACTAATACGAGCAAACCTACTCGGGATTGCTGTGGGATTGACAGATGCGATGTCATTCTTCATCACTGCAACT  
ATCTTTTATTATGCCACGGTTCTCATTACCAAGAGAGAGATCAGTATCGCGACTGCACTGCACTGTCAATCTTCTATTATTTGGTATTTCTA  
ATAGTACGAATATGCTGGCCACGATACCACAAAATCAAATCTTCTCGCGTTACAGCTACGCATATGCTTGCATTAGCCAATCTCGATTCACTTCT  
CTCCACGAAAATAAAGGAGCCGAACGGCTTTTCGACAATCTTTCCAATCAATTCACAGTCTCTCATCACATATCCTACTCGTCTGAAAACG  
AACGATATCATCCTTTCTCTTTCCCTGATCCTAACTCAACAACTGCACTTGTTCGGACCTCCGGCTCCGAAAGTCTACAATAGCTGCTCTGCT  
CGTTGGTCTCTATCCGCCAGATACTTCAACACCTCCACCGTTGACATTTCATCGTGTCTCCATAAGTAACTGTCACATTCGCTCTCTCCGGGCTT  
CTCTCTCACTCGTCCCAATAACCGATTCTATTTCCAGCTACCATTCTCCATAACATCATTTATGGTCTCCAGAATCTTCTCCTTGTGCCAGT  
CTTCCATCTGCTATTGCATCAGCAAAAAGATGTTGGATCCATGAATTTTCACATCGCTTCCACAAGTTATGATACTAT

>Bcin05g07690 (MLST2), partial sequence [organism=Botrytis cinerea, strain D09\_K\_4\_1]  
ACCCTATCACCAAGTCCCTTTCTGCACTTTCCCTCATCAAAAACGAACGAGAACATCATCAATAATACTTTGCTGAAGTAATTGGGTTTTATTT  
TGGCCAGGATGCCTTCTCTACGACAGCAAGCTTCGATGATATGTTGTGGTAGTTCTTGGCTGGCTGGATACTGTCAAATTCATTGATTTA  
CATTCTGAATTGCACTATTCAAACGACTCTCAGCCAGAAATGGTACGGACAACAATATAAACCTGCATTTGCACATCGAGCGGACTATTTTGGG  
AATTGGCTTCAAGGATGGGATACTACTCTCTGTGGTGGTGGATGATATGGTCACCATACTTACTCCATAACAAGAACGAATTACCAATGAA  
ACTCTATATCGCAGCTTCGATATCGATGTACCTATATTTCCCGGAGATGACAATCAATCCCCATTTATGATTTCCAACCTTCATATCCACCT  
CACGATCCGAAATATCTACAGGCAGCTGTTGATGCTTACAAAATGGCTGAATGGTTCCAACATGACGGATTACAAGGATTATATGTCGACGGGT  
ACCATATCTCGAATCTTTCTGGCGGTTGAAAACACCCATTTGCGATTCTAGAAATGAGATGGTATATACTTACAATCAAGGTGTTTTGCTTACTG  
GACAACGTGGTTGTATGACGCAACCGCCGACGATCATACTTGTAGATGGCCACAACCTCATCGCAATGTTATTAATGCCACAGGCTATGAC  
CTGAAACACAATGTTGTATCTCACCGCCACCCAAAGATGGTTCGCAATGGCAAAGTGGTTTTGGCTGGGTAGGAATGGAATACGGAAGAAG  
GATGCGATCAAGTGTCTCGTGTCTCAAATGGACAAAATTTCAAAGGCATATTTCTTTCATCACTTATTGCTGTTCTGTAGTATTTGCCAGG  
GGAGCTTATTGCAGGGACGAAGGAAAAGCTTAGAACTCGACAGAGTGTGGCATTTCTGACAAAATGCTCACAGTATACAAAAT

>Bcin06g01710 (MLST3), partial sequence [organism=Botrytis cinerea, strain D09\_K\_4\_1]  
GTGAGTCTGACTTTTGTGTTTGGAGCGTTAAGATAGACACTGATGTACCAAGGCAATCACCTAATTTTCATGGCGTTCTTCCCTGCATCATCTACC  
TACCCTGGAATGCTGGGAGAATTATACTCAGCAGCTTTCACAGCACCTGCTTTCAATTTGGATCTGTTCCCTGCGGTGACAGAATTTGGAGACGG  
TTGTAATGGATTGGCTGGCCAAGCTTCTCAATCTCCAGACTGTTATTTGTCTTCGACTCATGGTGGTGGTGTATCCAAGGATCAGCCTCGGA  
AGCTATCGTTACCGTTATGGTTGCTGCCCGGATAAAATATCTTCGTGAAACTACTGAAGTCTGTCCGGCATTTGAACTCGAGGATGCGATTGCA

```
TATAAGAGGAGTAAGCTAGTTGCACTAGGAAGCGAAATGGCACACAGCTCCACGCAGAAAGCAGCGCAGATAGCTGGCGTTAGATTCCGATCGA
TTCCAGTACTCGCATCCAATGATTTGCCATGACGGGTGATGATTTAGAGAAGGTATTGGAAGAATGCAAATCTCAAGGATTGGAACCCCTTCTA
TCTAACTTCGACTTTGGGAACAACATCTACATGCGCAGTTGACGACTTCGCATCTATTGCAACAGTACTTTCAAATATGCACCTCCAGATGTT
GCAGGCGAGATCTGGGTTACGTCGATGCTGCTTATGCAGGTGCAGCTTTGGTTTGCCCTGAATACCATCATCTAACATCGTCTTCCAGCATT
TCCATTCTTCGATATGAACATGCACAAATGGCTTCTGACAAATTTGACGCTTCTTGTCTATATGTCAAGAAACGCAAAGATCTGATAGATGC
ACTCTCCATAACACCAAGTTATCTTCGCAACGAGTTTTTCAGAGAGTGGACTCGTAACCGACTATCGGGATTGGCAAATTCCTCTCGGAAGACGC
TTCCGAAGCTTAAAGATTTGGTTTGTCTCAGAACCTAC
```

```
>Bcin09g03030 (MLST4), partial sequence [organism=Botrytis cinerea, strain D09_K_4_1]
CGACCCCTCAACCCACCGCAGCTCCTATACCGAAAGCGAGTATCCTACCAATTCCTTCCACCTGCGACTTTAAGACCATTGGCTTTCCGCA
CTTTTCAAAAAAAGCATAGTTTAAACATTGACGTCGTCGGCATTACAAGTGTGGCTACTTTTATTGGAAAGCATTGTGGGACAGGATGGAGGGA
AGAAGGACTGGCAGAGAGAGTCTTGAGAGAGGTCGCCAAGAGTTGGAAGAATAGGAGTGGCGGTGTCATTGTGCGAGGGCGAGGGAACGGAATTG
AAGGAGATTCTGAAAGCTTTGGAAGGGAATATGAGTGGTGAAGGATAGTCATAGGAAGAGAGCTAAGCCGGCAGAATAGTTTAGCACTGGGAT
CATCACAATATGGAGAGGTCAATCATAACAAGACTTGGGCTACGGCCAGGGAATATACCCAGAGAGGATAGTCAGTCAAGTTTGGGAATGTCAAC
GTTGGAGGTCAATGACGAGGAGGATGAGGATGGCCTGATGGATCCAAGAAGGTGGTTAAAAGTCATTGATGCATTTGAGCAACCTCGACTGGTG
TACAATGTTGCTAAAAAGCACTTTGATAGGTATGTTTCAATGATAAAAATTTTATCTGAATCTACTAAGTACAGTACAGAGATACCTCCAAACCTT
CATTGTTCCACCTGCGTCTCATAAAACACTCCTCTTCCAAAACCGCTATAATGTTATCCATCAACGTCTCCTTCGCAATGAATCTTTTCAAAC
GCCCCTTTTCAAGGTGGCAAATCTTCCCTTCAACGCAGCAGCTCCGCCATTACCACCCAACAACAATCATACAAATTAACGCCGATAGCTAAT
CTTCTCGGTGCGAATCGCAGCTCTCATATGCTTCTCGGTCTCCTCAGTATTTACCCACTGGTACCCTCGCCATCAATGACCTGACGGGCAGTA
TCGCTCTCGATCTTACACACGCAGCAGCCATT
```

```
>Bcin11g01310 (MLST5), partial sequence [organism=Botrytis cinerea, strain D09_K_4_1]
GCTGACATGGACCTCATGTGGAACCGCGTAGAATGCGCAACGCTTGAAGTTCCGCTCGAATATGGCGATGCAACGTCAACGGCAAAGCCAGT
GTTGCGCTTGCTCGTTATCCTGCCACTGTTGCCGCGAGCAAGAAGCTCGGGTCTCTTTGATAAACCCCGGTGGACCCGGTGCCCTGGTGTG
GCTTTGTGAGTCTGGAGCCGGTGCCCGCTCAGACACTGAGTGGTGGATTGTACGATATCATCGGATGGGATCCACGTGGAACCCGGTGCTTC
GGCTCCTATTTTGGAAATGTTTTGCAAATGCCAGTGCAGGAGTATGATTTTAAACAACGCGTTTCCATCTGCTCCGAATCTCTGGCTCGGACAATTT
GCGAATGCCAGCGCAAATCTGCTGTTAGTCTGCTATCACATCCTTTGACACTTCTGTGCTGCTCTTGCAAAAGCTTGCCTGGCTCAGAAAT
CTCCCGCTCTTTACACCTCAACAGCAGCATATGTTGCTCGAGACATGGCAGCGATAGTCGATGCATTGGATGGGACCTCTGCAAACCTTAACTA
CTGGGGTTTCTCATATGGAACATCTTCCCTAGCTGAGTTTATCCAAACTTTCCAGGCCGCGTGGGAAGAGTTCTTGCCGATGGTGTTCGCAC
GCAAAGGCAAATGCACTCACATACGTTAGCCAACCTTCCCAACGATCAACTCAGTGTTCGTGCTTGGTGAACGATTTTGCAGCTTTCTGCACCA
CCGCCGGTAGTAAAGGTTGCTCTTTTGGCACCGCCCTACTGGAACCTCAGGTAAGTGTGCTACCAGACTGGACAACATAATGAAGGATATGTT
CCTCAATCCTATTTGTTGCTTCGGGCTTAAAGCATCA
```

```
>Bcin15g03910 (MLST6), partial sequence [organism=Botrytis cinerea, strain D09_K_4_1]
GCCAAAACACAAAATCATCCAACGATGAAGATGATACTCCACTTCCCTTGATTATCTGGCATGGACTCGGCGATAATTACAAAGCGGATGGTCT
TGCGCAAGTTGGAAAAGTACTGAAAGCTATTCATCCTGGGACTTTTGTCTACAATATTCATGTAGATGAGGATGCATCTGCAGATAGGACAGCT
ACCTTCTTTGGAAAATCTCACTCGTGAGTACATCCCTATTTTTTCTTTAAATATCATACTAACTCTCTTACCAAGTTCAAATCGAAAAGGTCTG
CGAAGACCTCGCCTCCCATCCTATTTCTCTACCGCGCCCGCGTGCAGCAATTGGATTCTCCCAAGGCGGCCAATTTCTTGCCTGGTTACATA
TCCCCTGCAATGCTCCACCCATCCGCTCTCTCTGACCTTTGGTTCCCAACACAACGGCATTTCTGCCCTCCAAGCCTGTGGTCCGCGATT
TCTCTGTGCGGGTGTCAAACCCCTTTTGCAGTCCAACACCTGGTCAACCTTTGTCCAATCTCGTCTCGTACCCGCTCAATACTTCAGAGATCC
GGAAAACCTAGACTCTTACCTTGAATATTTCCAATTTCTTGGCCGACATCAATAATGAGCGCGTTCTCAAGAACCAAACATATAAATCCAACATG
GAAAAATTGGAACGATTCGTAATGTATGCTTTGAAAGACGACAACTGTCAATCCTAAGGAAAGTGGATGGTGGGCTGAAGTCAACGGCACGG
AAGTTACACCACTGAAAGAAAGAGCCATTTATAAAGAAAGATTGGCTAGGTTTAAAGACATTGGATGAGGCCGAAAATTAGTTTTTCGAAACCAT
TCCAGGGGGACATATGACGTTAGGAGAGGAGATGCTAGAGAAGGCTTTCAAAGAGTATTTTGGTCCAGCAGGGAAGAAATTTGGG
```

```
>Bcin16g03460 (MLST7), partial sequence [organism=Botrytis cinerea, strain D09_K_4_1]
ATGAACCTCTTGATTTGAACTCTTCATTAATTTGCAAGTGTGAAACCCCTATTTCTGCCCAGAGGATAGTTACAAGACGTATATCATTTAGTCGAGA
ACCCTCATGATATATATTGACGGATTTTTTGAAGCGAATGAAAGTAAACATTTGGTTGATGTTAGGTGTGTTATTCATTTCTGATGAAATGAAC
AAGAGAGACTGATGAGATAGTGAACCGCTTTATGAACCATCTACTGTTTCTCACGGACAGGAAGTTACCATTGATCCTTCAGTTCCGGAATTTCTG
AAGTGGCGGTTTTAGAGAGGGATGAGGTGGTCAAGTGTATTGAGCATAGAGCGAGGGCATTTTCAAGGGTGGAGGGGCGAGATGGGGATTGAGAA
GTTGAGGACGCAGAGGTATGGGGTTGGAGGACATTATGGGATGCATTTGTAAGTTTTGGGGGATTGACGAAGGCTTTGTCTATTTTCTACCAGT
ACGGATCTTGAAAGAAAGATAGCATGAACACGAGGGCTAATAACTAGGAAATAGCGATTGGAGCGGAGGTAAACGTGGCATAGACCGATTTAGT
ACTTTCATGGTCTATGTCGACGTATCCTCTGATATCGAAGGTGGAGGAACGGAATCCCACGTATTTGTTGGACAAAAGGAGGAAGGTGGGAGG
ACTTCTTGAAACTACGGAAGCATTTGGATCCAAGAACTGGAGAAAATGTAACAGTAGAAGGGGTGACATTTCAAACCAATCAAGGGAATGCCGT
ATTCTGGGAAAATACTGACAACAACGGGAGGGGCTATGAT
```

```
>Bcin12g03020 (MLST8), partial sequence [organism=Botrytis cinerea, strain D09_K_4_1]
```

```
CGATTGGCTGCGAAGAAAACCTGCGCAGCACCGAGTCACCAAAAAGCACGAATAAACCATCGGCAAGGAAATATTCTCTGAACCACAACATGACA
CGAGCGCGGAAGAGTATATCGGGCGAGAAGCTTCATCAAGAGCACCAAAGCGACAACGAGTCGATGATAAATTATAACTCTTACGGTGGAAAGAAA
TGAAAATACAGCAGCTTATGCTTCCGGGAAAACCTCCATCTGGAAGTATAAATGTTGGTGGAGGTAGGAAGACCACCTTTTCAAGAAGAACCACGA
ACGGCATTTGTGCTGGCAAGTTGCCCCCTGGAAAGTATCAACATTGGTGGAAAGAAAGGCTACCCAAATCGAGGACGAGGGTAGAGCAGCTTATG
CTTCCGGAAAATTGCCCTCCAGGAAGTATAAACTCTGGCGCAAAGAGGGCGATTTTCATTTCCAAGATGAAACGAGACCAGGCTTATGTCTCCGGAAA
GCTTCCACATGGTAGTATCGACGGTATGCGAAACCGTGAAATGGCTGCCGTCCACCGCGAAAATTGCTGAGGGTGGGAGGAAACCAGGCCAGGTT
GTCTCTTCTCTATTACATTTCAATCTACTTCAAAGAAAACCTTTTGATGAACCCGAAAGAACAAAGCGGAACCGGCAAACCATCCAATGCGCCTT
TGACAGAGGAAAATGGCGACTTTACCAATCTAGGGTTATCGAGAAGGCTTGCAGCCCATCTATCGACTAAACTCGATATGAAAGCCCCGACGGCC
ATTCAAAAAGCATCTGTGCAGCAGTTGGTATCGGACGATAGCGATGCTTTTCATACAAGCAGAGACTGGATCTGGAAAAACCTTTGGCATATCTAC
TACCTATAGTCGAGCGAATATTAGCATTGAGTGAGAATGGCGTACAAA
```

>Bcin02g07770 (MLST9), partial sequence [organism=Botrytis cinerea, strain D09\_K\_4\_1]

```
CAGCTTTCCCTTTTCGGTCTTGGCATCTACAGTCATTGCCATCCCTACACCCTCACAACTTGAGTCTCGGGCCGTTATCGATTCCGATGCCGTTG
TAGGATTTGCCGAAAACCTGTTCCAGTGGGACCGTAGGAACAGTTTATGAGGCATATAAACCATTTCCCTTAAAGTCGTAAATGGATGCGTACCATT
CCCTGCCGTGCGATGCATCGGGTAACACAGGGTATGTCTTATACCTTTCTCTTCCACACGATTGCTATTGAGTCTCTAATATATTTTTAGTGGTG
GTTTGTACCAACTGGCAGCAGCAATGGTGAATGCAGCAGCAGTACCGGTCAAGTATATGTTTCGAGGAGGACAAAGCGGATCAAACCTACGCTAT
CATGTACTCGTGGTAAGTTCTCTTTAAACTTCTCCTTATAGATCCAACCTAACAAAATCTTAGGTACATGCCAAAGGACGAGCCCTCAACCGGT
ATTGGTCCACCGTACGATTGGGAAGGTGTAATTGCTTGGCTCTCCAGCGCCACCGCCACAACCTGCCGACAACATCTTAGCCGTTTGTCTTCCG
CCCACGGAGGCTGGGATTGTTCCACGGATGGCTATTTCCCTTTCTGGTACCAGCCCTCTTATCAAGTACGAAAGTATCTGGCCCGTTCGATCACTC
AATGGGTCTTACTAGTACTGTTGGTGAAAACAACCTATGATTGCTTGGGAGTCTTTACCAACTGCTGCTCAAACCTGCTCTTGAGAACACCGAT
TTCGGTGTGCGAATGTTCCATTCATTCGGCTGTTTTTCACAGATAATCT
```

>Bcin04g02090 (MLST10), partial sequence [organism=Botrytis cinerea, strain D09\_K\_4\_1]

```
CGGAGGATGATATGGCAAAGTCTATGATTACCAAAGCATTTGTAGGCATGAGTAGTAAATTTGTCGAATATGACTATGAATGATGTTTACAAGCC
CTACATCCATGTAAGAAAATGTAGAATAAAGAGATCAGTAACTGGAACATAATATCGTTTTGCAGGCTTTCAAGTTACTTACGCAGTTCAACCCAAT
CACTACAGCTATTGCCGAATCCCCACTATTTCAAATGGCTGTCTCAGCAAATACCATCGAAAAGTACACACTGCTAGGCCCTTTCTTTCAGAATA
TCTCCTCTGCAACAGGAAGTTACCAGGGAATACTTCAGTGCGCCAAAGACGATAGATAGGCGACACATTTGCCACATCTCAAGATGCGTTACGAT
TGACCTTACAAAACCATCAAAAAGATTTACTTGTATATCATCAACCCTTTGTTTCGAGCAAGTCCAATCGCAAAAAGCAAAACCCCTGGATTGGTT
CGCTACATTTGTGAATCAAAAATCACAAGCGTCGAGCACTTCAGGTAGACCCGAAAGAGTGTCTTCTGATGGCTTTATGCACAATGTCACCTGTC
GTTCTAGATGGTCTTTGTGAGCCATTTCATGGATACCACATTTCTCAAAAATTTTCAAGATTGATATTGATTATCTAAGACGTGCGCCTCGTGTAG
ATATCAAGGACGAGACCAAGTTGAACGCTGATGAGAAGGCTTCTGAGAAGTATTATGAGGACACTGTTCTTGGCACCTTCTAATTTTCATCTCTGA
GGTATTCTTTCTGACATTTGGCTGCTCATATTATGGTAGTGAAGCTCTTAATGCCACGCATAAGAGTCTGGAGAAAAGACATCAAATATATTTCAA
AAGCAATTGACTGCCGTTGAAGCA
```

>Bcin01g07220 (MLST1), partial sequence [organism=Botrytis cinerea, strain D09\_K\_4\_2]

```
ATGGCATACTTGTCTTTCTTTTCGCATTATGCTTTGGAACGTGCTGGGCAAGCTTGGGTTAGTGCTCTGCGTGTAGAAGCACTAAAGAAGATTCT
CGCACAAACCGAAGTCATGGTTTTGAGGAATCCAGGAATTCACCTAGCCGGTTGAACGAAAGTTTTGGATAGGAACCTTGAGGAAATGCGTAATCTC
GTTGGCCGCTTTGCTGGTATTGTATTACAGCATTTTTTATGCTATTGATATCAATCATTGCGCTTTTCGTGAATACATGGAAACTGACATTAG
TCTCAATGGCAACTGGGCCAGTTATATACGCTGTCACCAAAAACGTTCAATCGCGTGAGTGGAAAATGGGAAAACAAGTGCACACTACGCATCTGA
AATGACCACTGGCATAATTTTCAGAGACTTTCTCCAACATCAAAGTGGTTTCGGGCTTTTACTCTGGAACCTTACTTTGAGACAAAACACACCAAA
GCTACAGAAGAACTCTATAAAGTTGGACTAATACGAGCAAACCTACTCGGGATTGCTGTGGGGATTGACAGATGCGATGTCATTTCTCATCACTG
CAACTATCTTTTATTATGCCACGGTCTCATTACCAAGAGAGAGATCAGTATTGCGACTGCACTACAGACTGTCAATCTTCTATTATTTGGTAT
TTCTAATAGTACGAATATGCTGGCTATGATACCACAAAATCAACTCTTCTCGGTTACAGCTACGCATATGCTTGCATTAGCCAATCTCGATTCA
TCTTCTCCACGAAAAATAAAGGAACCGAACGGCTTTTCGACAATCTTTCCAATCAAATTCACCCGCTTTTTCATTCACATACCCTACTCGTCTG
AAAAACGAACGATATCATCTTTTCTCTTTCCCTGATTCCCTAACTCAACAACCTGCACTTGTGCGACCCCTCCGGCTCCGAAAATCTACGATAGC
TGCTCTGCTCATTGGTCTCTATCCGCCAGATACTTCAACACCTCCACCGTTGACATTCAATCGCGTCTCCATAAGTAACTGTACATTTCCGTCT
CTCCGGGCTTCTCTCTCACTCGTCCCACAAAATACCGATTCTATTTCCAGCTACCATTCTCCATAACATCATTTATGGCCCTCCAGAATCTTCTC
CTTGTGCTAGTCTTCCATCTGCTATTGCATCAGCAAAAAGATGCTGGGATCCATGAATTTATCACATCGCTTCCACAAGGTTATGATACAT
```

>Bcin05g07690 (MLST2), partial sequence [organism=Botrytis cinerea, strain D09\_K\_4\_2]

```
ACCCTATCACCAAGTCTTCTCTGCACTTTCCCTCATCAAAAACGAACGAGAACATCATCAATAAATACTTTGCTGAAGTAATTGGGTTTTATT
TTGGCCAGGATGCCCTTCTCTCTACGACAGCAAGCCTTCGATGATATGTTGTGGTAGTTCTTGGCTGGCTGGATACTGTCAAATTCATTGATTT
ACATTCTGAATTGCACTATTCAAACGACTCTCAGCCAGAAATGGTACGACAACAATATAAACCTGCATTTGCACATCGAGCGGACTATTTTGG
GAATTGGCTTCAACAAGGATGGGATACTACTCTCTGTGGTGGTGGGATGATATGGTCCACATACCTTACTCCATAACAAGAAATGCAATTACCAATG
AACTCTATATCGCAGCTTCGATATCGATGTACCTCTATTTCCCGGAGATGACAATCAATCCCCATTTATGCTTTCCAACCCCTTCATATCCACC
TCACGATCCGAAAATATCTACAGGACGCTGTTGATGCTTACAAAATGGCTGAATGGTTCCAACATGACGGATTTACAAGGATTTATATGTCGACGGG
TATCATATCTCGAATCTTCTGCGGTGAAAACACCCATTTGCGATTCTAGAAATGAGATGGTATATACCTACAATCAAGGTGTTTTGCTTACTG
```

GACAACGTGGTTTGTATGACGCAACC GCCGACGATCATACCTTGTGGATGGCCACAACTCATCGGAATGTTATTAATGCCACAGGCTATGACCTGAAACACAATGTTGCCATCTCACC GCCACCCAAAGATGGTTCCGCATTGGCAAAGTGGTTTGGCCTGGGTAGGAATGGAATACTGGAAGAA GGATGCGATTCAAGTGCTTCGTGTTCTCAAAAATGGACAAAATTTCAAAGGCATATTTCTTCCACCACTTGATTGCGTTCGTAGT GATTGGCCAG GGGAGCCTATTGCGAGGGACGAAGGAAGGCC TAGAACTCGACAGAGTGTGGCATTCTGACAAAATGCTCACAGTATACAAAATGG

>Bcin06g01710 (MLST3), partial sequence [organism=Botrytis cinerea, strain D09\_K\_4\_2]  
GGTGAGTCTGACTTTTGTATTTGAGCGTTAAGATGGACTGATGTACCAAGGCAATCACCTAATTTTCATGGCGTTCTTCCCTGCATCATCTAC CTACCCTGGAATGCTGGGAGAATTATACTCAGCAGCTTTCACAGCTCCTGCTTTCAATTGGATCTGTTCCCTGCTGTGACAGAATTGGAGACG GTTGTAAATGGATTGGTTGGCCAAGCTTCTCAATCTCCAGACTGTTATTTGTGTCGACTCATGGTGGTGGTGTATCCAAGGATCAGCCTCGG AAGCTATCGTTACC GTTATGGTTGCTGCCCCGATAAGTATCTTCGTGAAACCACTGAAGGTCTGTCCGGAAATTGAACTCGAGGATGCGATTGC ATATAAGAGGAGTAAGCTAGTTGCACTAGGAAGCGAAAATGGCACACAGCTCCACGCAGAAAAGCAGCGCAGATAGCTGGCGTTAGATTCCGATCG ATTTCCAGTACTCGCATCCAATGATTTCCGCCATGACGGGTGATGATTTAGAGAAGGTATTGAAAGAATGCAAATCTCAAGGATTGGAACCTTCT ATCTAACTTCGACGTTGGGAACAACATCTACATGCGCAGTTGACGACTTCGCATCTATTGCAACAGTACTTTCAAAAATATGCACCTCCAGATGT TGCAGGCGAGATCTGGGTTACGTCGATGCTGCTTATGCAAGTGCAGCTTTGGTTTGGCCGTAATACCATCATCTAACATCGTCTTCCAGCAT TTCCATTCCCTTTGATATGAACATGCACAAAATGGCTTCTGACAAAATTTGCGACGCTTCTTGCCTATATGTCAAGAAAACGCAAAGATCTGATCGATG CACTCTCCATAACACCAAGTTATCTTCGCAACGAGTTTTCAGAGAGTGGACTCGTAACCGACTATCGGGACTGGCAAATTCCTCTCGGAAGACG TTTCCGAAGCTTAAAGATTTGGTTTGTCTCAGAACCTAC

>Bcin09g03030 (MLST4), partial sequence [organism=Botrytis cinerea, strain D09\_K\_4\_2]  
ACCCTTCAACCCACCGCAGCTCCTATACCGAAGCGAGTATCTTACCAATTTCTCCTTCCACCTGCGACTTTAAGACCATTGGCTTTTTCGCACT TTCACAAAAAAGCATAGTTTAAACATTGACGTCGTCCGCATTACAAGTGTGGCTACTTTTTATTGGAAAGCATTTGTGGGACAGGATGGAGGGAGG AAGGACTGGCAGAGAGAGTCTTGGAGGAGGTCGCCAAGAGTTGGAAGAATAGGAGTGGCGGTGTCATTGTGCGAGGGCGAGGGAACGGAATTGAA GGAGATTCTGAAAGCTCTGGAAGGGAATATGAGTGGTGAAGGATAGTTCATAGGAAGAGAGCTAAGCCGGCAGAATAGTTTAGTACTGGGATCA TCACAATATGGAGAGGTCAATCATAACAAGACTTGGGCTACGGCCAGGGAATATACCCAGAGAGGATAGTCAAGTTTGGGAATGTCAACGT TGGAGGTCAATGACGAGGAAGATGAGGATGGCCTGATGGATCCAAGAAGGTGGTTAAAAGTTCGTTGATGCATTTGAGCAACCTCGACTGGTGTGTA CAATGTTGCTAAAAAGCACTTTGATAGGTATGTTTCAATGATAAAAATTTTATCTGAATCGACTAATCAGTACAGAGATACCTCCAAACCTTCA TTGTTCCACCTGCGTCTCATAAAAACACTCCTCTTCCAAAACCGCTATAATGTTATCCATCAACGTCTCCTTTCGCAATGAATCTTTTCAAACGC CCGCTTTTCAAGGTGGCAAATCTTCCCTTCAACGCAGCAGCTCCGCCATTACCACCAACAACAATCATACAAATTAACGCCGATAGCTAATCT TCTCGGTGCGCAATCGCAGCTCTCATATGCTTCTCGGTCTCCTCAGTATTTACCCCACTGGTACCTCGCCATCAATGACCTGACGGGCAGTATC GCTCTTGATCTTACACACGCAGCAGCCATTC

>Bcin11g01310 (MLST5), partial sequence [organism=Botrytis cinerea, strain D09\_K\_4\_2]  
ACTGACATGGACCTCATGTGGAACCGGCGTAGAATGCGCAACGCTTGAAGTTCGCTCGAATATGGCGATGCAACGTCAACGGCAAAGCCAGT GTTTCGCTTGGCTCGTTATCTGCCACTGTTGCCGCGAGCAAGAAGCTCGGTTCTCTTTGATAAAATCCCGGTGGACCCGGTGCCTCTGGTGTG GCTTTGTGCACTGAGAGCCGGTGCCCGCTCTCGACACTGAGTGGTGGATTATACGATATCATCGGATGGGATCCACGTGGAACCGGTGCTTC GGCTCCTATTTTGGAAATGTTTTGCAAATGCCAGTGGGAGTATGATTTTAAACAACGCGTTTCCATCTGCTCCGAATCTCTGGCTCGGACAATTT GCGAATGCCAGCGCAAATTTCTGCTGTTAGCTCTGCTATCACATCCTTTGACACTTCTGTGCTGCTCTTGCAAAAGCTTGCCTGGCTCAGAAAT CTCCCGCTCTTTACACCTCAACAGCAGCATATGTTGCTCGAGACATGGCAGCGATAGTGCATGCAATGGATGGGACCTCTGCAAAAACCTTAAC TA CTGGGGTTTCTCATATGGAACATCTTCTTAGCTGAGTTTATCCAACTTTCCAGCCGCGTGGGAAGAGTTCTTGGCCGATGGTGTTCGAC GCAAAGGCAAATGCACTCACATACGTTAGCCAACTTCCCAACGATCAACTCAGTGTTCGTGCTTCCGTTGAACGATTTTGCAGCTTCTGCAACA CCGCCGGTAGTAAAGGTTGCTCTTTTGGCACCCGCCCTACTGGAACCTCAGGTACTGTTGCTACCAGACTGGACAACATAATGAAGGATATGTT CCTCAATCCTATTGTTGCTTCGGGCTTGAGCATCA

>Bcin15g03910 (MLST6), partial sequence [organism=Botrytis cinerea, strain D09\_K\_4\_2]  
GCCAAAACACAAAATCATCCAACGATGAAGATGATACTCCACTTCCCTTGATTATCTGGCATGGACTCGGCGATAATTACAAAGCGGATGGTCT TGCGCAAGTTGGAAAACCTAGCTGAAGCTATTCATCTGGGACTTTTGTCTATAAATATTCATGTAGATGAGGATGCATCTGCAGATAGGACAGCT ACCTTCTTTGGAAAATCTCACTCGTGAGTACATCCCTATTTTTCTTAAATACCATACTAATCTCTTACCAAGTTCAAATCGAAAAGGTCGTG CGAAGACCTCGCCTCCCATCCTATTCTCTTACC GCGCCCGGCTCGACGCAATGGATTCTCCCAAGGCGGCCAATTTCTTGC GCGGTTACATA TCCCCTGCAATGCTCCACCCATCCGCTCTCTCTGACCTTCGGTTCCCAACACAACGGCATTTCTGCCTTCCAAGCCTGTGGTCTGCCGATT TCCTCTGTGCGGGTGTCAAACCTTTTGCATCCAACACCTGGTCAACCTTTGTCCAATCTCGTCTCGTACCTGCTCAATACTTTCAGAGATCC GGAAAACCTAGACTCTTACCTTGAATATTTCCAATTTCTTGGCGACATCAATAATGAGCGCGTTCTCAAGAACCCAAACATATAAATCCAACATG GAAAAATTGGAACGATTTCGTAATGTATGCTTTGAAAGACGATACAACCTGTCAATCCCTAAGGAAAGTGGATGGTGGGCTGAAGTCAATGGCACGG AAGTTACACCACTGAAAGAAAGAGCCATTTATAAAGAAGATTGGCTAGGGTTAAAGACATTTGGATGAGGCCGAAAATTAGTTTTTCGAAACCAT TCCAGGGGGACATATGACGTTAGGAGAGGAGATGCTAGAGAAGGCTTTCAAAGAGTACTTTGGTCCAGCAGGGAAAAAATTTGGG

>Bcin16g03460 (MLST7), partial sequence [organism=Botrytis cinerea, strain D09\_K\_4\_2]  
ATGAACCTCTAATTTGAACTCTTCATTAATTTGCAAGTGTAGAGCCCTATTCTGCCAGAGGATAGTTACAAGACGTATATCATTTAGTTCGAGA

```
ACCACTCATGATATACATTGACGGATTTTGGAAAGCGAATGAAAGTAAACACTTGGTTGATGTTAGGTGTGTTATTTATTTCTGATGAAATGAAC
AGAGAGACTGATGAGATAGTGAACCGCTTATGAACCGTCTACTGTTTCTCACGGACAGGAAGTTACCATTGATCCTTCGGTTCGAAATTTCTGA
AGTGGCGGTTTTAGAGAGGGATGAGGTGGTCAAGTGTATTGAGCATAGAGCGAGGGCATTTCAGGGGTGGAGGGACGAGATGGGGATTGAGAAG
CTGAGGACGCAGAGGTATGGGGTTGGAGGACATTATGGGATGCATTTGTAAGTTTTGGGGATTGACGAAGGCCCTGTCTATTTTCTATCAGTA
CGGATCTTGAAGAAAAGATAGCATGAACACGAGGGCTAATAACTAGGAAATAGCGATTGGAGCGGAGGTAAACGTGGCATAGACCGATTTAGTA
CTTTTATGTTCTATGTCGACGTATCCTCTGATATCGAGGTGGAGGAACGGAATTCACAGTATTGTGGGACAAAAGGAGGAAGGTGGGAGGAC
TTCTTGAAAACACTACGGAAGCATTGGATCCAAGAACTGGAGAAAATGTAACAGTAGAAGGGGTGACATTCAAACCAATCAAGGAAATGCCGTAT
TCTGGGAAAATGCTGACAACAACGGGAGGGGCTATGAT
```

```
>Bcin12g03020 (MLST8), partial sequence [organism=Botrytis cinerea, strain D09_K_4_2]
CGATTGGCTGCGAAGAAAACCTGCGCAGCACCAGTCAACAAAAGCACGAAATAAACCATCGGCAAGGGAAATATTTCTCTGAACCACAACATGACA
CGAGCGCGAAGAGTATATCGGGCGAGAAGCTTCATCAAGAGCACCAAAGCGACAACGAGTCGATGATAATTATAACTCTTACGGTGGAGGAAA
TGAGAATACAGCAGCTTATGCTTCCGGGAAACTTCCATCTGGAAGTATAAATGTTGGTGGAGGTAGGAAGACCACTTTTCAAGAAGAACCCTCGA
ACGGCATTGTGCTGCGTGGCAAGTTGCCCTTGGAAAGTATCAACATTTGGTGGAAAGAAAGGCTACCCAAATCGAGGACGAGGGTAGAGCAGCTTATG
CTTCCGAAAATTTGCCCCAGGAAGTATAAACTCTGGCGCAAAGAAAGGCGATTTTCATTTCCAAGATGAAACGAGACCGGCTTATGTCTCTGGAAA
GCTTCCACATGGTAGTATCGACGGTATGCGAAACCGTGAAATGGCTGCCGTCCACCGCGAAATTGCTGAGGGTGGGAGGAAACCAGGCCAGGTT
GTCTCTTCTATTCACATTCATCTACTTCAAAGAAAACCTTCGATGAACCCGAAAGAACAAAGCGGAACCGGCAAACCATCCAATGCACCTT
TGACAGAGGAAAATGGCGACTTTCACCAATCTAGGGTTATCGAGAAGGCTTGACAGCCATCTATCGACTAAACTCGATATGAAAGCCCCGACCGC
CATTCAAAAAGCATCTGTGCAGCAGTTGGTATCGGACGATAGCGATGCTTTCATACAAGCAGAGACTGGATCTGGA AAAACTTTGGCATATCTA
CTACCTATAGTCGAGCGAATATTAGCATTGAGTGAGAATGGCGTACAAAT
```

```
>Bcin02g07770 (MLST9), partial sequence [organism=Botrytis cinerea, strain D09_K_4_2]
CAGCTTTCCCTTTTCGGTCTTGGCATCTACAGTCATTGCCATCCCTACACCATCACAACTTGAGTCTCGGGCCGTTATCGATTCCGATGCCGTTG
TAGGATTTGCCGAAACTGTTCCAGTGGGACCGTAGGAACAGTTTATGAGGCATATAAACCATTCCTTAAAGTCGTAAATGGATGCGTACCATT
CCCTGCCGTCGATGCATCGGGTAACACAGGGTATGTCTTATAACCATCTCTTCCACACGATTGCTATTGAGTCTCTAACATATTTTAGTGGTG
GTTTGTCAACAACTGGCAGTAGCAATGGTGGTTGACAGCAGCAGTACCGGTCAAGTATATGTTTCGAGGAGGACAAAGCGGATCAAACCTACGCCAT
CATGTACTCTTGTAAGTTCTCTCTAAACTTCTCCTTATAGATCCAACCTAACAAAATCTTAGGTACATGCCAAAGGACGAGCCCTCAACCGGT
ATTGGTCAACGTCACGATTGGGAAGGTGTAATTTGCTGGCTCTCAAGCGCCACCGCCACAACCTGCCGACAACATCTTAGCCGTTTGTCTTCCG
CCCACGGAGGCTGGGATTTGTTCCACCGATGGATATTTCCCTTTCTGGTACCAGCCCTCTTATCAAGTACGAAAAGTATCTGGCCCCGTCGATCATTC
AATGGGTCTTACCAGTACTGTTGGTGGAAAACAGCCTATGATTGCTTGGGAGTCTTTACCAACTGCTGCTCAAACCTGCTCTTGAGAACACCGAT
TTCGGTCTGCGAATGTTCCATTCATTCGGCTGTTTTACAGATAATCT
```

```
>Bcin04g02090 (MLST10), partial sequence [organism=Botrytis cinerea, strain D09_K_4_2]
CGGAGGATGATATGGCAAAGTCTATGATTACCAAAGCATTGTAGGCATGAGTAGTAAACTGTCGAATATGACTATGAATGATGTTTACAAGCC
CTACATCCATGTAAGAAATGTAGAATAGAGAGATCAGTAACTGGAACATAATATCGTTTGTAGGCTTTCAAGTTACTTACGCAGTTCAACCCAAT
CACTACAGCTATTGCCGAATCCCCTACTATTTCAAATGGCTGTCTCAGCAAATACCATCGAAAAGTACACACTGCTAGGCCCTTTCTTTCAGAATA
TCTCCTCTGCAACAGGAAGTTACCAGGGAATACTTCAGTGCGCCAAAGACGATAGATAGACGACACATTTGCCACATCTCAAGATGCGTTACGAT
TAACCTTACAAACCCATCAAAAAGATTTACTTGTATATCATCAACCACTTTGTTTCGAGCAAGTCCAATCGCAAAAAGCAAAACCCCTGGATTGGTT
CGCTACATTTGTGAATCAAAAATCACAAACGTCGAGCACTTCAGGTAGACCCGAAAGAGTGTCTTCTGATGGCTTTATGCACAATGTCACGTGC
GTTCTAGATGGTCTTTGTGAGCCATTCATGGATACCACATTTCTCGAAAATTTTCGAAAGATTGATATTGATTATCTAAGACGTGCGCCCTCGTGTAG
ATATCAAGGACGAGACCAAGTTGAACGCTGATGAGAAGGCTTCTGAGAAGTATTATGAGGACACTGTTCCCTGGCATTCTAATTTTCATCTCTGA
GGTCTTCTTCTGACATTTGGCTGCTCATATTATGGTAGTGAAGCTCTTAATGCCACGCATAAGAGTCTGGAGAAAAGACATCAAATATATTCAA
AAGCAATTGACTGCCGTTGAAGCA
```

```
>Bcin01g07220 (MLST1), partial sequence [organism=Botrytis cinerea, strain D10_B_F1_6]
ATGGCATATCTTGTCTTTTTCGATTATGCTTTGGAACGTGCTGGACAAGCTTGGGTTAGTGCTCTGCGTGTAGAAGCACTAAAGAAGATTCT
CGCACAACCGAAGTCATGGTTTTGAGGAATCCAGGAATTCACCTGGCCGGTTGAACGAAAGTTTTGGATAGGAACCTCGAGGAAATGCGTAATCTC
GTTGGCCGCTTTGCTGGTATTGTATTACAGCATTTTTTTATGCTATTGATATCAATCATTTGGGCTTTTCGTGAATACATGGAACCTGACATTAG
TCTCAATGGCGACTGGCCAGTTATATACGCTGTACCCAAAACGTTCAATCGCGTGAGTGGAAAATGGGAAAACAAGTGCAACTACGCATCTGA
AATGACCACTGGCATATTTTTCAGAGACTTTCTCCAACATCAAAGTGGTTTCGGGCTTTTACTCTGGAACTTACTTTTGGAGACAAAACACACCAA
GCTACAGAAGAACTCTATAAAAATTTGGACTAATACGAGCAAACACTCGGGATTGCTGTGGGGATTGACAGATGCGATGTCATTTCTTATCACTG
CAACTATCTTTTATTATGCCACGGTCTCATTTACCAAGAGAGAGATCAGTATCGCGACTGCAGACTGCAATCTTCTATTATTTGGTAT
TTCTAATAGTACGAATATGCTGGCCATGATACCACAAAATCAACTCTTCTCGGTTACAGCTACGCATATGCTTGCATTAGCCAATCTCGATTCA
TCTTCTCCCGGAAAATAAAGGAGCCGAAACGGCTTTTCGACAATCTTTCCAATCAAATTCACAGTCTCTCATTTACATATCCTACTCGTCTG
AAAAACGAACGACATCATCTTTTCTCTTTCCCTGATTCTAACTCAACAACTGCACTTGTCCGACCCCTCCGGCTCCGAAAATCTACAATAGC
TGCTCTGCTCGTTGGTCTCTATCCGCCAGATACTTCAACACCTCCACCGTTGACATTCATCGTGTCTCCATAAGTAACTGTACATTTCCGCTC
TCCGGGCTTCTCTCTCACTCGTCCACAAAATACCGATTCTACTTCCAGTACCATTCTCCATAACATCATTTATGGTCTCCAGAAATCTTCTC
```

CTTGTGCTAGTCTTCCATCTGCTATTGCATCAGCAAAAGATGCTGGGATCCATGAATTTATCACATCGCTTCCACAAGGTTATGATACTAT

>Bcin05g07690 (MLST2), partial sequence [organism=Botrytis cinerea, strain D10\_B\_F1\_6]  
ACCCTATCACCAAGTCCCTTTCTGCACTTTCCCTCATCAAAAAATGAACGAGAACATCATCAATAAACTTTGCTGAAGTAATTGGGTTTTATT  
TTGGCCAGGATGCCCTTCTCTCTACGACAGCAAGCCTTCGATGATATGTTGTGGGTAGTTCTTGGCTGGCTGGATACTGTCAAATTCATTGATTT  
ACATTCTGAATTGCACTATTCAAACGACTCTCAGCCAGAATGGTACGGACAACAATATAAACCTGCATTTGCACATCGAGCGGACTATTTTGG  
GAATTGGCTTCAACAAGGATGGGATACTACTCTCTGTGGTGGTGGGATGATATGGTCACCATACTTACTCCATAACAAGAACGCAATTACCAATG  
AACTCTATATCGCAGCTTCGATATCGATGTACCTATATTTCCCCGGAGATGACAATCAATCCCCATTTATGATTTCCAACCCCTTCATATCCACC  
TCACGATCCGAAATATCTACAGGCAGCTGTTGATGCTTACAAATGGCTGAATGGTTCCAACATGACGGATTCACAAGGATTATATGTCGACGGG  
TACCATATCTCGAATCTTTCTGGCGGTGAAAACACCCATTGCGATTCTAGAAATGAGATGGTATATAACCTACAATCAAGGTGTTTTGCTTACTG  
GACAACGTGGTTTTGTATGACGCAACC GCCGACGATCATACCTTGTAGATGGCCACAACTCATCGCGAATGTTATTAATGCCACAGGCTATGA  
CCTGAAACACAATGTTGTCATCTCACC GCCACCCAAAGATGGTTCCGCATTGGCAAAGTGGTTTTGGCTGGGTAGGAATGGAATACTGGAAGAA  
GGATGCGATTCAAGTGCTTCGTGTTCTCAAATGGACAACTTTCAAAGGCATATTTCTTTCATCACTTGATTGCGTTCTGTAGTGATTTGCCAG  
GGGAGCCTATTGCAGGGACGAAGGAAAGCTTAGAACTCGACAGAGTGTGGCATTCTGACAAATGCTCACAGTATACAAAAAT

>Bcin06g01710 (MLST3), partial sequence [organism=Botrytis cinerea, strain D10\_B\_F1\_6]  
GTGAGTCTGACTTTTGTATTTGAGCGTTAAGATAGACACTGATATACCAAGGCAATCACCTAATTTTCATGGCGTTCTTCCCTGCATCATCTACC  
TACCCTGGAATGCTGGGAGAATTATACTCAGCAGCTTTTACAGCTCCTGCTTTCAATTGGATCTGTTCCCTGCGGTGACAGAATTGGAGACGG  
TTGTAATGGATTGGCTGGCCAAGCTTCTCAATCTCCAGACTGTTATTTGTCTTCGACTCATGGTGGTGGTGTATCCAAGGATCAGCCTCGGA  
AGCTATCGTTACCGTTATGGTTGCTGCCCGGATAAAATATCTTCGTGAACTACTGAAGTCTGTGCGGCATTGAACTCGAGGATGCGATTGCA  
TATAAGAGGAGTAAGCTAGTTGCACTAGGAAGCGAAATGGCACACAGCTCCACGACAGAAAGCAGCGCAGATAGCTGGCGTTAGATTCCGATCGA  
TTCCAGTACTCGCATCCAATGATTTGCGCATGACGGGTGATGATTTAGAGAAGGTATTGGAAGAATGCAAATCTCAAGGATTGGAACCCCTTCTA  
TCTAACTTCGACTTTGGGAACAACATCTACATGCGCAGTTGACGACTTCGCATCTATTGCAACAGTACTTTCAAATATGCACCTCCAGATGTT  
GCAGGCGAGATCTGGGTTACGTCGATGCTGCTTATGCAGGTGCAGCTTTGGTTTTGCCCTGAATACCATCATCTAACATCGTCCCTCCAGCATT  
TCCATTCTTCGATATGAACATGCACAAATGGCTTCTGACAAATTTGACGCTTCTTGTCTATATGTCAAGAAACGCAAAGATCTGATCGATGC  
ACTCTCCATAACACCAAGTTATCTTCGCAACGAGTTTTTCAGAGAGTGGACTCGTAACCGACTATCGGGACTGGCAAATTCCTCTCGGAAGACGC  
TTCCGAAGCTTAAAGATTTGGTTTTGTCTCAGAACCCTAC

>Bcin09g03030 (MLST4), partial sequence [organism=Botrytis cinerea, strain D10\_B\_F1\_6]  
ACCCTTCAACCCACCAGCTCCTATACCGAAAGCGAGTATCCTACCAATTCCTTCCACCTGCGACTTTAAGACCATTGGCTTTCCGCACCT  
TTCACAAAAAAGCATAGTTTAAACATTGACGTCGTCCGCATTACAAGTGTGGCTACTTTTATTGGAAAGCATTGTGGGACAGGATGGAGGGAAG  
AAGGACTGGCAGAGAGAGTCTTGGAGGAGGTGCGCAAGAGTTGGAAGAATAGGAGTGGCGGTGTCAATTGTGCGAGGGCAGGGAAACGGAATTGAA  
GGAGATTCTGAAAAGCTTTGGAAGGGAAATATGAGTGGTGGAAAGGATAGTCAATAGGAAGAGAGCTAAGCCGGCAGAATAGTTTAGTACTGGGATCA  
TCACAATATGGAGAGGTCAATCATAACAAGACTTGGGCTACGGCCAGGGAATATACCCAGAGAGGATAGTCAAGTGTGGGAATGTCAACGT  
TGGAGGTCAATGACGAGGAGGATGAGGATGGCCTGATGGATCCAAGAAGTGGTTAAAAGTCATTGATGCATTTGAGCAACCTCGACTGGTGTGTA  
CAATGTTGCTAAAAAGCACTTTGATAGGTATGTTTCAATGATAAAAATTTTATCTGAATCTACTAACCTCAGTACAGAGATACCTCCAAACCTTCA  
TTGTTCCACCTGCGTCTCATAAAAACACTCCTCTTCCAAAACCGCTATAATGTTATCCATCAACGTCTCCTTCGCAATGAATCTTTTCAAACGC  
CCGCTTTTCAAGGTGGCAAATCTTCCCTTCAACGCAGCAGCTCCGCCATTACCACCAACAACAATCATACAAATTAACGCCGATAGCTAATCT  
TCTCGGTGCGAATCGCAGCTCTCATATGCTTCTCGGTCTCCTCAGTATTTACCCACTGGTACCCTCGCCATCAATGACCTGACGGGCAGTATC  
GCTCTCGATCTTACACACGCAGCAGCCATTC

>Bcin11g01310 (MLST5), partial sequence [organism=Botrytis cinerea, strain D10\_B\_F1\_6]  
GCTGACATGGACCTCATGTGGAACCGCGTAGAATGCGCAACGCTTGAAGTTCGCTCGAATATGGCGATGCAACGTCAACGGCAAAGCCAGT  
GTTGCGCTTGCTCGTTATCTGCCACTGTTGCCGCGAGCAAGAAGCTCGGGTCTCTCTTGATAAAACCCCGGTGGACCCGGTGCCTCTGGTGTG  
GCTTTGTGCACTCTGGAGCCGGTGCCGCCGCTCTGACACTGAGTGGTGGATTGTACGATATCATCGGATGGGATCCACGTGGAACCGGTGCTTC  
GGCTCCTATTTTGGAAATGTTTTGCAAATGCCAGTGGGAGTATGATTTTAAACAACGCGTTTCCATCTGCTCCGAATCTCTGGCTCGGACAATTT  
GCGAATGCCAGCGCAAATTTCTGCTGTTAGCTCTGCTATCACATCCTTTGACACTTCTGTGCGTGCCTTTGCAAAAGCTTGGCTGGCTCAGAAAT  
CTCCCGCTCTTTACACCTCAACAGCAGCATATGTTGCTCGAGACATGGCAGCGATAGTTCGATGCATTTGGATGGGACCTCTGCAAACTTAACTA  
CTGGGGTTTCTCATATGGAACATATCTTCTAGCTGAGTTTATCCAACTTTCCAGGCCGCTGGGAAGAGTTCTTGCCGATGGTGTTCGAC  
GCAAAGGCAAATGCACTCACATACGTTAGCCAATTTCCCAACGATCAACTCAGTGTTCGTGCTTCGTTGAACGATTTTGCAGCTTTCTGCACCA  
CCGCCGGTAGTAAAGGTTGCTCTTTTGGCCACC GCCCTACTGGAACTCAGGTAAGTGTGCTACCAGACTGGACAACATAATGAAGGATATGTT  
CCTCAATCCTATTGTTGCTTCGGGCTTAAAGCATCA

>Bcin15g03910 (MLST6), partial sequence [organism=Botrytis cinerea, strain D10\_B\_F1\_6]  
GCCAAAACACAAAATCATCCAACGATGAAGATGATACTCCACTTCCCTTGATTATCTGGCATGGACTCGGCGATAATTACAAAGCGGATGGTCT  
TGCGCAAGTTGGAACACTAGCTGAAGCTATTCATCTGGGACTTTTGTCTACAATATTCATGTAGATGAGGATGCATCTGCAGATAGGACAGCT  
ACCTTCTTTGAAAATCTCACTCGTGAAGTACATCCCTATTTTCTTTAAATATCATACTAACTCTCTTACCAAGTTCAAATCGAAAAGGTCTG

```
CGAAGACCTCGCCTCCCATCCTATTCTCTCTACCGCGCCCGCGCTCGACGCAATTGGATTCTCCCAAGGCGGCCAATTCTTGCCTGGTTACATA
TCCCCTGCAATGCTCCACCCATCCGCTCTCTCTGACCTTTGGTTCCCAACACAACGGCATTCTGCCTTCCAAGCCTGTGGTCTGCCGATT
TCCTCTGTGCGGGTGTCAAACCTTTTGGGATCCAACACCTGGTCAACCTTTGTCCAATCTCGTCTCGTACCCGCTCAATACTTCAGAGATCC
GGAAAACCTAGACTCTTACCTTGAATATTCCAATTTCCCTTGCCGACATCAATAATGAGCGCGTTCTCAAGAACCACAAACATATAAAATCCAACATG
GAAAAATTGGAACGATTTCGTAATGTATGTCTTTGAAGACGACACAACCTGTCAATTCCTAAGGAAAAGTGGATGGTGGGCTGAAGTCAACGGCACGG
AAGTTACACCACTGAAAGAAAGAGCCATTTATAAAGAAGATTGGCTAGGTTTAAAGACATTGGATGAGGCCGAAAATTAGTTTTTCGAAACCAT
TCCAGGGGGACATATGACGTTAGGAGAGGAGATGCTAGAGAAGGCTTTCAAAGAGTATTTTGGTCCAGCAGGGAAGAAATTTGGG
```

```
>Bcin16g03460 (MLST7), partial sequence [organism=Botrytis cinerea, strain D10_B_F1_6]
ATGAACCTCTTGATTTGAACTCTTCATTAATTGCAAGTGATGAACCCCTATTCTGCCAGAGGATAGTTACAAGACGTATATCATTAGTCGAGA
ACCACCTCATGATATATATTGACGGATTTTGGAAAAGCGAATGAAAAGTAAACATTTGGTTGATGTTAGGTGTGTTATTTATTTCTGATGAAATGAAC
AAGAGAGACTGATGAGATAGTGAACCCGCTTTATGAACCGTCTACTGTTTCTCACGGGCAGGAAGTTACCATTGATACTTCAGTTCGAAATTTCTG
AAGTGGCGGTTTTAGAGAGGGATGAGGTGGTCAAGGTGATTGAGCATAGAGCGAGGGCATTTCAGGGGTGGAGGGGCGAGATGGGGATTGAGAA
GTTGAGGACGCAGAGGTATGGGGTTGGAGGACATTTATGGGATGCATTTGTAAGTTTTGGGGGATTGACGAAGGCTTTTTGTCTATTTTTCTACCAG
TACGGATCTTGGAAAAGAAAGATAGCATGAACACGAGGGCTAATAACTAGGAAAATAGCGATTGGAGCGGAGGTAACCGTGGCATAGACCGATTTAG
TACTTTTCATGGTCTATGTGACGATATCCTCTGATATCGAAGGTGGAGGAACGGAATTTCCACGTATCGTGGGACCAAAAAGGAGGAAGGTGGGAG
GACTTCTTGAAACTACGGAAGCATTTGGATCCAAGAACTGGAGAAAATGTAACAGTAGAAGGGGTGACATTCAAACCAATCAAGGGAAATGCCG
TATTCTGGGAAAATACTGACAACAACGGGAGGGGCTATGATG
```

```
>Bcin12g03020 (MLST8), partial sequence [organism=Botrytis cinerea, strain D10_B_F1_6]
TCGATTGGCTGCGAAGAAAACCTGCGCAGCACCGAGTCAACAAAAGCAGCAATAAACCATCGGCAAGGGAAATATTCTCTGAACCACAACATGAC
ACGAGCGCGGAAGAGTATATCGGGCGAGAAAGCTTCATCAAGAGCACCAAAAGCAGCAACGAGTTCGATGATAAATTATAACTCTTACGGTGGAAAGAA
ATGAAAATACAGCAGCTTATGCTTCCGGGAAAACCTCCATCTGGAAGTATAAATGTTGGTGGAGGTAGGAAGACCACTTTTCAAGAAGAACCCTCG
AACGGCATTGTGCTGGCAAGTTGCCCCCTGGAAGTATCAACATTTGGTGGAAAAGAGGCTACCCAAATCGAGGACGAGGGTAGAGCAGCTTAT
GCTTCCGGAAAATTTGCCCCAGGAAGTATAAACTCTGGCGCAAAGAAGGCGATTTCAATCCAAGATGAAACGAGACCCGGCTTATGTCTCCGGAA
AGCTTCCACATGGTAGTATCGACGGTATGCGAAAACCGTGAATGGCTGCCGTCCACCGCGAAAATTTGCTGAGGGTGGGAGGAAAACCAGGCCAGGT
TGCTCTTCTCTATTTCACATTCATCCTACTTCAAAGAAAACCTTTCGATGAACCAGAAGAACAAGCGGAACCGGCAAAAACCATCCAATGCGCCT
TTGACAGAGGAAATGGCGACTTTCACCAATCTAGGGCTATCGAGAAGGCTTGCAGCCCATCTATCGACTAAACTCGATATGAAAGCCCCGACGG
CCATTCAAAAAGCATCTGTGACAGCAGTTGGTATCGGACGATAGCGATGCTTTCATACAAGCAGAGACTGGATCTGGAAAAACCTTTGGCATATCT
ACTACCTATAGTCGAGCGAATATTAGCATTGAGTGAGAATGGCGTACAAA
```

```
>Bcin02g07770 (MLST9), partial sequence [organism=Botrytis cinerea, strain D10_B_F1_6]
CAGCTTTCCCTTTTCGGTCTTGGCATCTACAGTCATTGCCATCCCTACACCATCACAACTTGAGTCTCGGGCCGTTATCGATTCCGATGCCGTTG
TAGGATTTGCCGAAAACCTGTTCCAGTGGGACCGTAGGAACAGTTTATGAGGCATATAAACCATTTCCCTAAAGTCGTAAATGGATGCGTACCATT
CCCTGCCGTCGATGCATCGGGTAACACAGGGTATGTCTTATACTTTCTCTTCCACACGATTGCTATTGAGTCTCTAACATATTTTAGTGGTG
GTTTGTACCAACTGGCAGCAGCAATGGTGAATGCAGCAGCAGTACCGGTCAAGTATATGTTTCGAGGAGGACAAAGCGGATCAAACCTACGCTAT
CATGTACTCCTGGTAAGTTCTCTTTAAACTTCTCCTTATAGATCCAACCTAACAAAATCTTAGGTACATGCCAAAGGACGAGCCCTCAACCGGT
ATTGGTCACCGTCACGATTGGGAAGGTGTAATTGTCTGGCTCTCCAGCGCCACCGCCACAACCTGCCGACAACATCTTAGCCGTTTTGTCTTCCG
CCCACGGAGGCTGGGATTGTTCACGGATGGCTATTTCCCTTTCTGGTACCAGCCCTCTTATCAAGTACGAAAGTATCTGGCCCGTCGATCACTC
AATGGGTCTTACTAGTACTGTTGGTGGAAAACAACCTATGATTGCTTGGGAGTCTTTACCAACTGCTGCTCAAACCTGCTCTTGAGAACACCGAT
TTCGGTGTGCGAATGTTCCATTCAATTCGGCTGTTTTTCACAGATAATCTT
```

```
>Bcin04g02090 (MLST10), partial sequence [organism=Botrytis cinerea, strain D10_B_F1_6]
CGGAGGATGATATGGCAAAAGTCTATGATTACCAAAGCATTTGTAGGCATGAGTAGTAAATTTGTCGAATATGACTATGAATGATGTTTACAAGCC
CTACATCCATGTAAGAAAATGTAGAATAAAGAGATCAGTAACTGGAACATAATATCGTTTGCAGGCTTTCAAGTTACTTACGCAGTTCAACCCAAT
CACTACAGCTATTGCCGAATCCCCTACTTTCAAATGGCTGTCTCAGCAAATACCATCGAAAAGTACACACTGCTAGGCCCTTTCTTTCAGAATA
TCTCCTCTGCAACAGGAAGTTACCAGGGAATACTTCAGTGCGCCAAAAGACGATAGATAGGGCGACACATTTGCCACATCTCAAGATGCGTTACGAT
TGACCTTACAAAACCCATCAAAAAGATTTACTTGTATATCATCAACCACTTTGTTCGAGCAAGTCCAATCGAAAAAGCAAAAACCCCTGGATTGGTT
CGCTACATTGTGAATCAAAAATACAAGCGTCGAGCACTTCAGGTAGACCCGAAAGAAGTGTCTTCTGATGGCTTTATGCACAATGTCACCTGTC
GTTCTAGATGGTCTTTGTGAGCCATTTCATGGATACCACATTTCTCAAAAATTTGAAAGATTGATATTGATTATCTAAGACGTGCGCCTCGTGTAG
ATATCAAGGACGAGACCAAGTTGAACGCTGATGAGAAGGCTTCTGAGAAAATATTATGAGGACACTGTTCTTGGCACTTCTAATTTTCATCTCTGA
GGTATTCTTTCTGACATTGGCTGCTCATCATTATGGTAGTGAAGCTCTTAATGCCACGCATAAGAGTCTGGAGAAAAGACATCAAAATATATTCAA
AAGCAATTGACTGCCGTTGAAGCA
```

```
>Bcin01g07220 (MLST1), partial sequence [organism=Botrytis cinerea, strain D10_B_F3_5]
ATGGCATATCTTGTCTTTCTTTTCGATTTATGCTTTGGAACGTGCTGGACAAGCTTGGGTTAGTGCTCTGCGTGTAGAAGCACTAAAGAAGATTCT
CGACAACCGAAGTCATGGTTTGGAGAAATCCAGGAATTCACCTGGCCGTTGAACGAAGTTTTGGATAGGAACCTCTGAGGAAATGCGTAATCTC
```



```
GTGTGGCCGCTTTGCTGGTATTGTATTTCACAGCATTTTTTATGCTATTGATATCAATCATTGGGCTTTCGTGAATACATGGAAACTGACATTAG
TCTCAATGGCGACTGGGCCAGTTATATACGCTGTACCCAAAACGTTCAATCGCGTGAGTGGAAAAATGGGAAAAACAAGTCAACTACGCATCTGA
AATGACCACTGGCATATTTTCAGAGACTTTCTCCAACATCAAAGTGGTTTCGGGCTTTTACTCTGGAACTTACTTTGAGACAAAACACACCCAAA
GCTACAGAAGAACTCTATAAAAATTGGACTAATACGAGCAAACACTCTCGGGATTGCTGTGGGGATTGACAGATGCGATGTCATTTCTCATCACTG
CAACTATCTTTTATTATGCCACGGTCTCATTACCAAGAGAGAGATCAGTATCGCGACTGCACTGCAGACTGTCAATCTTCTATTATTTGGTAT
TTCTAATAGTACGAATATGCTGGCCATGATACCACAAAATCAACTCTTCTCGCGTTACAGTACGCATATGCTTGCATTAGCCAATCTCGATTCA
TCTTCTCCACGAAAAATAAAGGAGCCGAACGGCTTTTCGACAATCTTTCCAATCAAATTCACAGTCTCTCATTACATATCTTACTCGTCTG
AAAAACGAACGATATCATCTTTTCTCTTTCCCTGATTCTAACTCAACAACGCACTTGTTCGGACCCCTCCGGCTCCGAAAAATCTACAATAGC
TGCTCTGCTCGTTGGTCTCTATCCGCCAGATACTTCAACACCTCCACCGTTGACATTCAATCGTGTCTCCATAAGTAACTGTCACATTCCGTCT
CTCCGGGCTTCTCTCTCACTCGTCCACAAAATACCGATTCTATTTCCAGTACCATTCTCCATAACATCATTTATGGTCTCCAGAATCTTCTC
CTTGTGCTAGTCTTCCATCTGCTATTGCATCAGCAAAAAGATGCTGGGATCCATGAATTTATCACATCGCTTCCAAAAGGTTATGATACTATG
```

```
>Bcin05g07690 (MLST2), partial sequence [organism=Botrytis cinerea, strain D10_B_F3_5]
CACCCTATCACCAAGTCTTTTCTGCACTTTCTCATCAAAAACGAACGAGAACATCATCAATAAAATACTTTGTGAAGTAATTGGGTTTTTAT
TTTGGCCAGGATGCCTTCTCTCTACGACAGCAAGCCTTCGATGATATGTTGTGGGTAGTTCTTGGCTGGCTGGATACTGTCAAATTCATTGATT
TACATTCTGAATTGCACTATTCAAACGACTCTCAGCCAGAATGGTACGGACAACAATATAAACCTGCATTTGCACATCGAGCGGACTATTTTG
GGAATTGGCTTACAAGGATGGGATACTACTCTCTGTGGTGGTGGGATGATATGGTACCATAACCTTACTCCATAACAAGAACGCAATTACCAAT
GAACTCTATATCGCAGCTTCGATATCGATGTACCTATATTTCCCGGAGATGACAATCAATCCCATTTATGATTTCCAACCTTCATATCCAC
CTCACGATCCGAAATATCTACAGGCAGCTGTTGATGCTTACAAAATGGCTGAATGGTTCCAACATGACGGATTACAAGGATTATATGTCGACGG
GTACCATATCTCGAATCTTTCTGGCGGTGAAAAACCCCATTCGATTTCTAGAAAATGAGATGGTATATACCTACAATCAAGGTGTTTTGCTTACT
GGACAACGTGGTTTTGTATGACGCAACCGCCGACGATCATACTTGTAGATGGCCACAACTCATCGGAATGTTATTAATGCCACAGGCTATG
ACCTGAAAACACAATGTTGTATCTCACCGCCACCCAAAAGATGGTTCCGCATTGGCAAAGTGGTTTTGGCTGGGTAGGAATGGAATACTGGAAGA
AGGATGCGATTCAAGTGTCTCGTGTCTCAAAAATGGACAACTTTCAAAGGCATATTTCTTCACTACTTGATTGCGTTCTGTAGTGAATTTGCCA
GGGAGCCTATTGCAGGGACGAAGGAAAGCTTAGAACTCGACAGAGTGTGGCATTCTGACAAAATGCTCACAGTATACAAAATG
```

```
>Bcin06g01710 (MLST3), partial sequence [organism=Botrytis cinerea, strain D10_B_F3_5]
GGTGAGTCTGACTTTTGTGTTTTGAGCGTTAAGATAGACACTGATGTACCAAGGCAATCACCTAATTTTCATGGCGTTCCTCCCTGCATCATCTAC
CTACCTTGAATGCTGGGAGAATTATACTCAGCAGCTTTCACAGCACCTGCTTTCAATTTGGATCTGTTCCCTGCCGTGACAGAATTTGGAGACG
GTTGTAATGGATTGGCTGGCCAAGCTTCTCAATCTCCAGACTGTTATTTGTCTTCGACTCATGGTGGTGGTGTATCCAAGGATCAGCCTCGG
AAGCTATCGTTACCCTTATGGTTGCTGCCCCGCGATAAAATATCTTCGTGAACTACTGAAGGTCTGTGCGGCATTGAACTCGAGGATGCGATTGC
ATATAAGAGGAGTAAGCTAGTTGCACTAGGAAGCGAAATGGCACACAGCTCCACGCAGAAAGCAGCGCAGATAGCTGGCGTTAGATTCCGATCG
ATTCCAGTACTCGCATCCAATGATTTCCGCATGACGGGTGATGATTTAGAGAAGGTATTTGGAAGAATGCAAATCTCAAGGATTTGGAACCTTCT
ATCTAACTTCGACTTTGGGAACAACATCTACATGCGCAGTTGACGACTTCGCATCTATTTGCAACAGTACTTTCAAAAATATGCACCTCCAGATGT
TGCAGGCGAGATCTGGGTTACGTCGATGCTGCTTATGCAGGTGCAGCTTTGGTTTTGCCCTGAATACCATCATCTAACATCGTCTTCCAGCAT
TTCCATTCTTCGATATGAACATGCACAAAATGGCTTCTGACAAAATTTGACGCTTCTTGTCTATATGTCAAGAAACGCAAAGATCTGATAGATG
CACTCTCCATAACACCAAGTTATCTTCGCAACGAGTTTTCAGAGAGTGGACTCGTAACCGACTATCGGGATTGGCAAATTTCTCTCGGAAGACG
CTTCCGAAGCTTAAAGATTTGGTTTTGTCTCAGAACCCTAC
```

```
>Bcin09g03030 (MLST4), partial sequence [organism=Botrytis cinerea, strain D10_B_F3_5]
ACCCTTCAACCCACCGCAGCTCCTATACCGAAAAGCGAGTATCCTACCAATTTCTCTTCCACCTGCGACTTTAAGACCATTGGCTTTCCGCACT
TTCACAAAAAAGCATAGTTTAAACATTGACGTCGTCGGCATTACAAGTGTGGCTACTTTTATTGGAAAGCATTTGTGGGACAGGATGGAGGGAAG
AAGGACTGGCAGAGAGAGTCTTGGAGGAGTTCGCAAGAGTTGGAAGAATAGGAGTGGCGGTGTCATTGTGCGAGGGCAGGGAACGGAATTTGAA
GGAGATTCTGAAAGCTTTGGAAGGGAATATGAGTGGTGGAAAGGATAGTCAATAGGAAGAGAGCTAAGCCGGCAGAATAGTTTAGTACTGGGATCA
TCACAATATGGAGAGGTCATATACAAAGACTTGGGCTACGGCCAGGGAATATACCCAGAGAGGATAGTCAAGTCTTGGGAATGTCAACGT
TGGAGGTCAATGACGAGGAGGATGAGGATGGCCTGATGGATCCAAGAAGTGGTTAAAAGTCATTGATGCATTTGAGCAACCTCGACTGGTGTG
CAATGTTGCTAAAAAGCACTTTGATAGGTATGTTTCAATGATAAAAATTTTATCTGAATCTACTAACTCAGTACAGAGATACTCCAAACCTTCA
TTGTTCCACCTGCGTCTCATAAAAACACTCCTCTTCCAAAACCGCTATAATGTTATCCATCAACGCTCTCTTCCGAATGAATCTTTTCAAACGC
CCGCTTTTCAAGGTGGCAAATCTTCCCTTCAACGCAGCAGCTCCGCCATTACCACCAACAACAATCATACAAAATTAACGCCGATAGCTAATCTT
CTCGGTCGCAATCGCAGCTCTCATATGCTTCTCGGTCTCTCAGTATTTACCCACTGGTACCCTCGCCATCAATGACCTGACGGGCAGTATCG
CTCTCGATCTTACACACGCAGCAGCCATTC
```

```
>Bcin11g01310 (MLST5), partial sequence [organism=Botrytis cinerea, strain D10_B_F3_5]
GGCTGACATGGACCTCATGTGGAACCGCGTAGAATGCGCAACGCTTGAAGTTCGCTCGAATATGGCGATGCAACGTCAACGGCAAAAGCCAG
TGTTGCGCTTGTCTGTTATCCTGCCACTGTTGCCGCGAGCAAGAAGCTCGGGTCTCTTTGATAAACCCTGGTGGACCCGGTGCCTCTGGTGT
GGCTTTGTGCACTGAGGACCGGTGCCGCCGCTCTCGACACTGAGTGGTGGATTGTACGATATCATCGGATGGGATCCACGTGGAACCGGTGCTT
CGGCTCCTATTTTGAATGTTTTGCAAAATGCCAGTCCGAGTATGATTTTAAACAACGCTTTCCATCTGCTCCGAATCTCTGGCTCGGACAATT
TGCAATGCCAGCGCAAATTTCTGCTGTTAGCTCTGCTATCACATCTTTGACACTTCTGTGCTGCTCTTGCAAAAGCTTGGTGGCTCAGAAA
```

```
TCTCCCCGCTCTTTACACCTCAACAGCAGCATATGTTGCTCGAGACATGGCAGCGATAGTCGATGCATTGGATGGGACCTCTGCAAACTTAACT
ACTGGGGTTTCTCATATGAACTATCTTCTAGCTGAGTTTATCCAACTTTCCAGGCCGCGTGGGAAGAGTTCTTGCCGATGGTGTTCGA
CGCAAAGGCAAATGCACTCACATACGTTAGCCAACTTCCCAACGATCAACTCAGTGTTCGTGCTTCGTTGAACGATTTTGCAGCTTCTGCACC
ACCGCCGGTAGTAAAGGTTGCTCTTTTGCCACCGCCCTACTGGAACTCAGGTACTGTTGCTACCAGACTGGACAACATAATGAAGGATATGT
TCCTCAATCCTATTGTTGCTTCGGGCTTAAGCATCA
```

```
>Bcin15g03910 (MLST6), partial sequence [organism=Botrytis cinerea, strain D10_B_F3_5]
GCCAAAACACAAAATCATCCAACGATGAAGATGATACTCCACTTCCCTTGATTATCTGGCATGGACTCGGCGATAATTACAAAGCGGATGGTCT
TGCGCAAGTTGGAAAAGTAGCTGAAGCTATTCATCTGGGACTTTTGTCTACAATATTCATGTAGATGAGGATGCATCTGCAGATAGGACAGCT
ACCTTCTTTGGAAAATCTCACTCGTGAGTACATCCCTATTTTTTCTTTAAATATCATACTAACTCTCTTACCAAGTTCAAATCGAAAAGGCTCG
CGAAGACCTCGCCTCCCATCCTATTCTCTCTACCAGCCCGCCGTCGACGCAATTGGATTCTCCCAAGGCCGCAATTTCTTGCCTGGTTACATA
TCCCCTGCAATGCTCCACCCATCCGCTCTCTCTGACCTTTGGTTCCCAACACAACGGCATTCTGCCTTCCAAGCCTGTGGTCTGCCGATT
TCCTCTGTGCGGGTCTCAAACCTTTTGCATCCAACACCTGGTCAACCTTTGTCCAATCTCGTCTCGTACCCGCTCAATACTTCAGAGATCC
GGAAAACCTAGACTCTTACCTTGAATATCCAATTTCTTGGCGACATCAATAATGAGCGCGTTCTCAAGAACCAAACATATAAATCCAACATG
GAAAAATTGGAACGATTTCGTAATGTATGTCTTTGAAAGACGACACAACCTGTCATTCCTAAGGAAAGTGGATGGTGGGCTGAAGTCAACGGCACGG
AAGTTACACCACTGAAAGAAAGAGCCATTTATAAAGAAGATTGGCTAGGTTTAAAGACATTTGGATGAGGCCGAAAATTAGTTTTCGAAACCAT
TCCAGGGGGACATATGACGTTAGGAGAGGAGATGCTAGAGAAGGCTTTCAAAGAGTATTTTGGTCCAGCAGGGAAGAAAATTTGGG
```

```
>Bcin16g03460 (MLST7), partial sequence [organism=Botrytis cinerea, strain D10_B_F3_5]
ATGAACCTCTTAATTTGAACTCTTCATTAATTTGCAAGTGATGAACCCCTATTTCTGCCAGAGGATAGTTACAAGACGTATATCATTAGTCGAGA
ACCCTCATGATATATATGACGGATTTTGAAGCGAATGAAAGTAAACATTTGGTTGATGTTAGGTGTGTTATTTATTTCTGATGAAATGAAC
AAGAGAGACTGATGAGATAGTGAACCGCTTTATGAACCGTCTACTGTTTCTCACGGGCAGGAAGTTACCATTGATACTTCAGTTTCGAAATTTCTG
AAGTGGCGGTTTTAGAGAGGGATGAGGTGGTCAGGTGATTTGAGCATAGAGCGAGGGCATTTCAGGGGTGGAGGGGCGAGATGGGGATTGAGAA
GTTGAGGACGCAGAGGTATGGGGTTGGAGGACATTTATGGGATGCATTTGTAAGTTTTGGGGATTGACGAAGCTTTTGTCTATTTTCTACCAG
TACGGATCTTGAAAAGAAAGATAGCATGAACACGAGGGCTAATAACTAGGAAAATAGCGATTGGAGCGGAGGTAACGTGGCATAGACCGATTTAG
TACTTTTCATGGTCTATGTGCGACGTATCCTCTGATATCGAAGGTGGAGGAACGGAAATTTCCACGTATCGTGGGACCAAAAGGAGGAAGGTGGGAG
GACTTCTTGAAACTACGGAAGCATTGGATCCAAGAACTGGAGAAAATGTAACAGTAGAAGGGGTGACATTCAAACCAATCAAGGGAAATGCCG
TATTCTGGGAAAATACTGACAACAACGGGAGGGGCTATGAT
```

```
>Bcin12g03020 (MLST8), partial sequence [organism=Botrytis cinerea, strain D10_B_F3_5]
CGATTGGCTGCGAAGAAAAGTGCAGCAGCCGAGTACCCAAAAGCACGAATAAACCATCGGCAAGGGAAAATTTCTCTGAACCACAACATGACA
CGAGCGCGAAGAGTATATCGGGCGAGAAGCTTCATCAAGAGCACCAAAGCGACAACGAGTGCATGATAAATTATAACTCTTACGGTGGAAAGAAA
TGAAAATACAGCAGCTTATGCTTCCGGGAAAAGTTCCATCTGGAAGTATAAATGTTGGTGGAGGTAGGAAGACCCTTTTCAAGAAGAACCCTCGA
ACGGCATTGTGCTGCAAGTTGCCCCCTGGAAGTATCAACATTTGGTGGAAAGAAGGCTACCCAAATCGAGGACGAGGGTAGAGCAGCTTATG
CTTCCGAAAATTTGCCCCAGGAAGTATAAATCTTGGCGCAAAGAAGGCGATTTCAATCCAAGATGAAACGAGACCGGCTTATGTCTCCGAAA
GCTTCCACATGGTAGTATCGACGGTATGCGAAAACCGTGAATGGCTGCCGTCCACCGCGAAAATTTGCTGAGGGTGGGAGGAAACCAGGCCAGGTT
GTCTCTTCTCTATTACATTCATCCTACTTCAAAGAAAAGTTTTCGATGAACCAGAAGAACAAGCGGAACCGGCAAACCATCCAATGCGCCTT
TGACAGAGGAAATGGCGACTTTCACCAATCTAGGGCTATCGAGAAGGCTTGACAGCCATCTATCGACTAAACTCGATATGAAAGCCCCGACGGC
CATTCAAAAGCATCTGTGCAGCAGTTGGTATCGGACGATAGCGATGCTTTCATACAAGCAGAGACTGGATCTGGAAAAGTTTGGCATATCTA
CTACCTATAGTCGAGCGAATATTAGCATTGAGTGAGAAATGGCGTACAAA
```

```
>Bcin02g07770 (MLST9), partial sequence [organism=Botrytis cinerea, strain D10_B_F3_5]
CAGCTTTCCCTTTTCGGTCTTGGCATCTACAGTCAATGCCATCCCTACACCCTCACAACTTGAGTCTCGGGCCGTTATCGATTCCGATGCCGTTG
TAGGATTTGCCGAAAAGTGTCCAGTGGGACCGTAGGAACAGTTTATGAGGCATATAAACCATTCCCTTAAAGTCGTAAATGGATGCGTACCATT
CCCTGCCGTCGATGCATCGGGTAACACAGGGTATGTCTTATACCTTTCTCTTCCACACGATTGCTATTGAGTCTCTAATATATTTTAGTGGTG
GTTTGTACCAACTGGCAGCAGCAATGGTGAATGCAGCAGCAGTACCGGTCAAGTATATGTTTCGAGGAGGACAAAGCGGATCAAACCTACGCTAT
CATGTACTCGTGGTAAGTTCTCTTTAAACTTCTCCTTATAGATCCAACCTAACAAAATCTTAGGTACATGCCAAAGGACGAGCCCTCAACCGGT
ATTGGTCAACGTCACGATTGGGAAGGTGTAATTTGCTGGCTCTCCAGCGCCACCGCCACAACCTGCCGACAACATCTTAGCCGTTTGTCTTCCG
CCCACGGAGGCTGGGATTGTTCCACGGATGGCTATTTCCCTTTCTGGTACCAGCCCTTTATCAAGTACGAAAAGTATCTGGCCCGTCGATCACTC
AATGGGTCTTACTAGTACTGTTGGTGGAAAACAACCTATGATTGCTTGGGAGTCTTTACCAACTGCTGCTCAAACCTGCTCTTGAGAACACCGAT
TTCGGTGTGCGAATGTTCCATTCAATCCGGCTGTTTTTCACAGATAATCTT
```

```
>Bcin04g02090 (MLST10), partial sequence [organism=Botrytis cinerea, strain D10_B_F3_5]
CGGAGGATGATATGGCAAAGTCTATGATTACCAAAGCATTTGTAGGCATGAGTAGTAAATTTGTCGAATATGACTATGAATGATGTTTACAAGCC
CTACATCCATGTAAGAAAATGTAGAATAAAGAGATCAGTAACTGGAACTAATATCGTTTGCAGGCTTTCAAGTTACTTACGCAGTTCAACCCAAAT
CACTACAGCTATTGCCGAATCCCCTACTATTTCAAATGGCTGTCTCAGCAAATACCATCGAAAAGTACACACTGCTAGGCCCTTTCTTTCAGAATA
TCTCCTCTGCAACAGGAAGTTACCAGGGAATACTTCAGTGCGCCAAAGACGATAGATAGGCGACACATTTGCCACATCTCAAGATGCGTTACGAT
```

TGACCTTACAAACCCATCAAAAAAGATTTACTTGTATATCATCAACCACCTTTGTTCGAGCAAGTCCAATCGCAAAAAGCAAAACCCCTGGATTGGTT  
CGCCTACATTGTGAATCAAAATCACAAGCGTCGAGCACTTCAGGTAGACCCGAAAGAAGTGTCTTCTGATGGCTTTATGCACAATGTCACCTGTC  
GTTCTAGATGGTCTTTGTGAGCCATTCATGGATACCACATTTCTCAAAAAATTTGAAAGATTGATATTGATTATCTAAGACGTGCGCCTCGTGTAG  
ATATCAAGGACGAGACCAAGTTGAACGCTGATGAGAAAGCTTCTGAGAAATATTATGAGGACACTGTTCTGGCACCTTCTAATTTTCATCTCTGA  
GGTATTCTTTCTGACATTGGCTGCTCATCATTATGGTAGTGAAGCTCTTAATGCCACGCATAAGAGTCTGGAGAAAAGACATCAAAATATATTTCAA  
AAGCAATTGACTGCCGTTGAAGCA

>Bcin01g07220 (MLST1), partial sequence [organism=Botrytis cinerea, strain D10\_B\_S6\_1]  
ATGGCATATCTTGTTCCTTTTCGCATTATGCTTTGGAACGTGCTGGGCAAGCTTGGGTTAGTGCTCTGCGTGTAGAAGCACTAAAGAAGATTCT  
CGCACAACCGAAGTCATGGTTTGGAGAAATCCAGGAATTCACCTAGCCGGTTGAAACGAAATTTGGATAGGAACTCTGAGGAAATGCGTAATCTC  
GTTGGCCGCTTTGCTGGTATTGTATTACAGCATTFTTTTATGCTATTGATATCAATCATTTGGGCTTTCTGTAATGCATGGAACCTGACATTAG  
TCTCAATGGCAACTGGCCAGTTATATACGCTGTCAACAAAACGTTCAATCGCGTGAGTGGAAAATGGGAAAACAAGTGAACCTACGCATCTGA  
AATGACCACTGGCATATTTTCAGAGACTTTCTCCAACATCAAAGTGGTTTCGGGCTTTTACTCTGAAAACCTTACTTTGAGACAAAACACACAAA  
GCTACAGAAGAACTCTATAAAGTTGGACTAATACGAGCAAACTACTCGGGATTGCTGTGGGGATTGACAGATGCGATGTCATTCTTCATCCTG  
CAACTATCTTTTATTATGCCACGGTTCTCATTACCAAGAGAGAGATCAGTATTGCGACTGCACTACAGACTGTCAATCTTCTATTATTTGGTAT  
TTCTAATAGTACGAATATGCTGGCTATGATACCACAAAATCAACTCTTCTCGCTTACAGCTACGCATATGCTTGCATTAGCCAATCTCGATTCA  
TCTTCTCCACGAAAATAAAGGAACCGAACGGCTTTTCGACAATCTTTCCAATCAAATCAACCGTCTTTTCATTACATACCCCTACTCGTCCCTG  
AAAAACGAACGATATCATCTTTTCTCTTTCCCTGATTCTTAACCAACTACACTTGTTCGGACCCCTCCGGCTCCGAAAATCTACGATAGC  
TGCTCTGCTCATTGGTCTCTATCCGCCAGATACTTCAACACCTCCACCGTTGACATTCAATCGCGTCTCCATAAGTAACTGTACATTTCCGTCT  
CTCCGGGCTTCTCTCTCACTCGTCCACAAAATACCGATTCTATTTCCAGTACCATTCTCCATAACATCATTTTATGGCTCCAGAACTCTTCTC  
CTTGTGCTAGTCTTCCATCTGCTATTGCATCAGCAAAAAGATGCTGGGATCCATGAATTTATCACATCGCTTCCACAAGGTTATGATACTAT

>Bcin05g07690 (MLST2), partial sequence [organism=Botrytis cinerea, strain D10\_B\_S6\_1]  
ACCACTATCACCAAGTCTTTTCTGCACTTTCTCATCAAAAACGAACGAGAATCATCAATAAAACTTTTGTGAAGTAAATGGGTTTTATT  
TTGGCCAGGATGCCTTCTCTACGACAGCAAGCCTTCGATGATATGTTGTGGGTAGTTCTTGGCTGGCTGGATACTGTCAAATTCATTGATTT  
ACATTCTGAATTCACACTATTCAAACGACTCTCAGCCAGAAATGGTACGGACAACAATAAAACCTGCATTTGCACATCGAGCGGACTATTTTGG  
GAATTGGCTTCAACAAGGATGGGATACTACTCTCTGTGGTGGTGGGATGATATGGTACCATACTTACTCCATAACAAGAAATGCAATTACCAATG  
AACTCTATATCGCAGCTTCGATATCGATGTACCTCTATTTCCCGGAGATGACAATCAATCCCATTTATGCTTTCCAACCCCTTCATATCCACC  
TCACGATCCGAAATATCTACAGGCAGCTGTTGATGCTTACAAATGGCTGAATGGTTCCAACATGACGGATTTACAAGGATTTATATGTCGACGGG  
TATCATATCTCGAATCTTTCTGGCGGTGAAAACACCCATTTGCGATTCTAGAAATGAGATGGTATATACCTACAATCAAGGTGTTTTGCTTACTG  
GACAACGTGGTTTGTATGACGCAACCGCCGACGATCATACTTGTGGATGGCCACAACTCATCGCAATGTTATTAATGCCACAGGCTATGA  
CCTGAAACACAATGTTGCCATCTCACCGCCACCCAAAGATGGTTCCGCATTGGCAAAGTGGTTTTGGCTGGGTAGGAATGGAATACGGAAGAA  
GGATGCGATTCAAGTGCTTCGTGTTCTCAAAAATGGACAAAATTTCAAAGGCATATTTCTTTACCACTTGATTGCGTTCGTAGTGAATTTGCCAG  
GGGAGCCTATTGCAAGGACGAAGGAAGGCTTAGAACTCGACAGAGTGTGGCATTCTGACAAAATGCTCACAGTATACAAAATG

>Bcin06g01710 (MLST3), partial sequence [organism=Botrytis cinerea, strain D10\_B\_S6\_1]  
GTGAGTCTGACTTTTGTATTTGAGCGTTAAGATGGACACTGATGTACCAAGGCAATCACCTAATTTTCATGGCGTTCTTCCCTGCATCATCTACC  
TACCCTGGAATGCTGGGAGAATTATACTCAGCAGCTTTACAGCTCCTGCTTTCAATTGGATCTGTTCCCTGCTGTGACAGAATTGGAGACGG  
TTGTAATGGATTGGTTGGCAAGCTTCTCAATCTCCAGACTGTTATTTGTCGTCGACTCATGGTGGTGGTGTATCCAAGGATCAGCCTCGGA  
AGCTATCGTTACCGTTATGGTTGCTGCCCGGATAAGTATCTTCGTGAAACCACTGAAGGTCGTTCGGGAATTGAACTCGAGGATGCGATTGCA  
TATAAGAGGAGTAAGCTAGTTGCACTAGGAAGCGAAATGGCACACAGCTCCACGCAAGAAAGCAGCGCAGATAGCTGGCGTTAGATTCCGATCGA  
TTCCAGTACTCGCATCCAATGATTTGCGCATGACGGGTGATGATTTAGAGAAGGTATTGAAAGAATGCAAACTCAAGGATTGGAACCCCTTCTA  
TCTAACTTCGACGTTGGGAACAACATCTACATGCGCAGTTGACGACTTCGCATCTATTGCAACAGTACTTTCAAATATGCACCTCCAGATGTT  
GCAGGCGAGATCTGGGTTACGTCGATGCTGCTTATGCAGGTGCAGCTTTGGTTTGCCCTGAATACCATCATCTAACATCGTCTTCCAGCATT  
TCCATTCTTTGATATGAACATGCACAAAATGGCTTCTGACAAAATTTGACGCTTCTTGCCCTATATGTCAAGAAACGCAAAGATCTGATCGATGC  
ACTCTCCATAACACCAAGTTATCTTCGCAACGAGTTTTCAGAGAGTAGACTCGTAACCGACTATCGGGACTGGCAAATTCCTCTCGGAAGACGT  
TTCCGAAGCTTAAAGATTTGGTTTTGTCTCAGAACCTAC

>Bcin09g03030 (MLST4), partial sequence [organism=Botrytis cinerea, strain D10\_B\_S6\_1]  
GACCCTTCAACCCACCGCAGCTCCTATACCGAAAGCGAGTATCCTACCAATTTCTCTTCCACCTGCGACTTTAAGACCAATGGCTTTTTCGCAC  
TTTCACAAAAAAGCATAGTTTAAACATTGACGTCGTCGGCATTACAAGTGTGGCTACTTTTATTTGGAAAGCATTGTGGGACAGGATGGAGGGAG  
GAAGGACTGGCAGAGAGAGTCTTTGGAGAGGTCGCCAAGAGTTGGAAGAATAGGAGTGGCGGTGTCATTGTGCGAGGGCAGGGAACGGAATTGA  
AGGAGATTCTGAAAGCTTTGGAAGGGAATATGAGTGGTGGAAAGGATAGTCATAGGAAGAGAGCTAAGCCGGCAGAATAGTTTAGTACTGGGATC  
ATCACAATATGGAGAGGTCATCATAAAGACTTTGGGCTACGGCCAGGGATATACCCAGAGAGGATAGTCAAGTAAAGTTGGGAATGTCAACGT  
TGGAGGTCAATGACGAGGAAGATGAGGATGGCCTGATGGATCCAAGAAAGTGGTTAAAAGTCTGTTGATGCATTTGAGCAACCTCGACTGGTGT  
CAATGTTGCTAAAAGCACTTTGATAGGTATGTTTCAATGATAAAAATTTTATCTGAATCGACTAACTCAGTACAGAGATACCTCCAAACCTTCA  
TTGTTCCACCTGCGTCTCATAAAAACACTCTCTTCCAAAACCGCTATAATGTTATCCATCAACGCTCTCTTCCGAATGAATCTTTTCAAACGC

CCGCTTTTCAAGGTGGCAAATCTTCCCTTCAACGCAGCACGTCCGCCATTACCACCCAACAACAATCATACAAATTAACGCCGATAGCTAATCT  
TCTCGGTGCGAAATCGCAGCTCTCATATGCTTCTCGGTCTCCTCAGTATTTGCCCCACTGGTACCCTCGCCATCAATGACCTGACGGGCAGTATC  
GCTCTTGATCTTACACACGCAGCAGCCATTCCCG

>Bcin11g01310 (MLST5), partial sequence [organism=Botrytis cinerea, strain D10\_B\_S6\_1]  
ACTGACATGGACCTCATGTGGAACCGGCTAGAATGCGCAACGCTTGAAGTTCGCTCGAATATGGCGATGCAACGTCAACGGCAAAGCCAGT  
GTTGCGCTTGCTCGTTATCTGCCACTGTTGCCGCGAGCAAGAAGCTCGGGTCTCTCTTGATAAAATCCCGGTGGACCCGGTGCCTCTGGTGTG  
GCTTTGTGCACTCTGGAGCCGGTGCCGCCGTCTCGACACTGAGTGGTGGATTATACGATATCATCGGATGGGATCCACGTGGAACCGGTGCTTC  
GGCTCCTATTTTGAATGTTTTGCAAATGCCAGTGGGAGTATGATTTTAAACAACGCTTTCATCTGCTCCGAATCTCTGGCTCGGACAATTT  
GCGAATGCCAGCGCAAATCTGCTGTTAGCTCTGCTATCACATCCTTTGACACTTCTGTCGCTGCTCTTGCAAAAGCTTGCCTGGCTCAGAAAT  
CTCCCGCTCTTTACACCTCAACAGCAGCATATGTTGCTCGAGACATGGCGGCGATAGTCGATGCATTGGATGGGACCTCTGCAAACTTAAC  
CTGGGGTTTCTCATATGGAACCTATCTTCCCTAGCTGAGTTTATCCAACTTTCCAGGCCGCGTGGGAAGAGTCTTGCCGATGGTGTTCGCAC  
GCAAAGGCAAATGCACTCACATACGTTAGCCAACCTCCCAACGATCAACTCAGTGTTCGTGCTTCTGTTGAACGATTTTGCAGCTTTCTGCACCA  
CCGCCGGTAGTAAAGGTTGCTCTTTGCCACCGCCCTACTGGAACCTCAGGTACTGTTGCTACCAGACTGGACAACATAATGAAGGATATGTTT  
CTCAATCCTATTGTTGCTTCGGGCTTGAGCATCA

>Bcin15g03910 (MLST6), partial sequence [organism=Botrytis cinerea, strain D10\_B\_S6\_1]  
GCCAAAACACAAAATCATCCAACGATGAAGATGATACTCCACTTCCCTTGATTATCTGGCATGGACTCGGCGATAAATACAAAGCGGATGGTCT  
TGCGCAAGTTGGAAAAGTAGCTGAAGCTATTCATCCTGGGACTTTTGTCTATAATATTCATGTAGATGAGGATGCATCTGCAGATAGGACAGCT  
ACCTTCTTTGAAAATCTCACTCGTGAGTACATCCCTATTTTTCCTTTAAATACCATACTAACTCTTACCAAGTTCAAATCGAAAAGGTCTG  
CGAAGACCTCGCCTCCATCCTATCTCTCTACCAGCCCGCGTGCAGCAATTGGATTCTCCAAGGCGGCAATTTCTTGCGCGGTTACATA  
TCCCCTGCAATGCTCCACCCATCCGCTCTCTCTGACCTTCGGTTCCCAACACAACGGCATTTCTGCCTTCCAAGCCTGTGGTCTGCCGATT  
TCCTCTGTCGCGGTGCTCAAACCCCTTTGCGATCCAACACCTGGTCAACCTTTGTCCAATCTCGTCTCGTACCTGCTCAATACTTCAGAGATCC  
GGAAAACCTAGACTCTTACCTTGAATATCCAATTTCTTGGCGACATCAATAATGAGCGGTTCTCAAGAACCACAAACATATAAAATCCAACATG  
GAAAAATTGGAACGATTCGTAATGTATGCTTTGAAAGACGATACAACCTGTCATCCCTAAGGAAAGTGGATGGTGGGCTGAAGTCAATGGCACGG  
AAGTTACACCACTGAAAAGAAAGAGCCATTTATAAAAGAAAGATTGGCTAGGGTTAAAGACATTTGGATGAGGCCGGAAAATTAGTTTTTCGAAACCAT  
TCCAGGGGGACATATGACGTTAGGAGAGGAGATGCTAGAGAAGGCTTTCAAAGAGTACTTTGGTCCAGCAGGGAAAAAATTTGGG

>Bcin16g03460 (MLST7), partial sequence [organism=Botrytis cinerea, strain D10\_B\_S6\_1]  
ATGAACCTCTTAATTTGAACTCTTCAATTAATTGCAAGTGATGAACCCCTATTTCTGCCAGAGGATAGTTACAAGACGTATATCATTAGTCGAGA  
ACCACTCATGATATACATTGACGGATTTTGAAGCGAATGAAAGTAAACACTTGGTTGATGTTAGGTGTGTTATTTATTCTGATGAAATGAAC  
AAGAGAGACTGATGAGATAGTGAACCGCTTTATGAACCGTCTACTGTTTCTCACGGACAGGAAGTTACCATTGATCCTTCGGTTCGAAATTTCTG  
AAGTGGCGGTTTTAGAGAGGGATGAGGTGGTCAAGGTGATTTGAGCATAGAGCGAGGGCATTTTCAGGGGTGGAGGGGCGAGATGGGGATTGAGAA  
GTTGAGGACGCAGAGGTATGGGGTTGGAGGACATTTATGGGATGCATTTGTAAGTTTTGGGGGATTGACGAAGGCCCTCTGTTTATTTTCTATCAG  
TACGGATCTTGAAAGAAAGATAGCATGAACACGAGGGCTAATAACTAGGAAATAGCGATTGGAGCGGAGGTAAACGTGGCATAGACCGATTTAG  
TACTTTTCATGGTCTATGTCGACGTATCCTCTGATATCGAAGGTGGAGGAACGGAAATTTCCACGTATTTGTTGGGACCAAAAGGAGGAAGGTGGGAG  
GACTTCTTGAAAACCTACGGAAGCATTGGATCCAAGAAGCTGGAGAAAATGTAACAGTAGAAGGGGTGACATTTCAAACCAATCAAGGGAAATGCCG  
TATTCTGGGAAAATACTGACAACAACGGGAGGGGCTATGAT

>Bcin12g03020 (MLST8), partial sequence [organism=Botrytis cinerea, strain D10\_B\_S6\_1]  
TCGATTGGCTGCGAAGAAAAGTGGCGAGCACCAGTCAACAAAAGCACGAATAAACCATCGGCAAGGGAAATATTTCTCTGAACCACAACATGAC  
ACGAGCGCGGAAGAGTATATCGGGCGAGAAGCTTTCATCAAGAGCACAAAGCGACAACGAGTGCATGATAAATATAACTCTTACGGTGGAAAGAA  
ATGAGAATACAGCAGCTTATGCTTCCGGGAAAACCTCCATCTGGAAGTATAAATGTTGGTGGAGGTAGGAAGACCACTTTTCAAGAAGAACCCTCG  
AACGGCATTTGTCGCTGGCAAGTTGCCCCCTGGAAGTATCAACATTTGGTGGAAAAGAGGCTACCCAAATCGAGGACGAGGGTAGAGCAGCTTAT  
GCTTCCGGAAAATTTGCCCCAGGAAGTATAAACTCTGGCGCAAAGAAGGCGATTTTCATTTCCAAGATGAAACGAGACCGGCTTATGTCTCTGGAA  
AGCTTCCACATGGTAGTATCGACGGTATGCGAAAACCGTGAATGGCTGCCGTCCACC CGAAAATGCTGAGGGTGGGAGGAAACCAGGCCAGGT  
TGCTCTTCTCTATTCACATTCATCCTACTTCAAAGAAAACCTTTCGATGAACCCGAAAGAACAGCGGAAACCGGAAAACCATCCAATGCACCT  
TTGACAGAGGAAATGGCGACTTTACCAATCTAGGGTTATCGAGAAGGCTTGACAGCCATCTATCGACTAAACTCGATATGAAAGCCCCGACCG  
CCATTCAAAGGATCTGTGACAGCTTGGTATCGGACGATAGCGATGCTTTTACATAAAGCAGAGACTGGATCTGGAAAACCTTTGGCATATCT  
ACTACCTATAGTCGAGCGAATATTAGCATTTGAGTGAGAATGGCGTACAAA

>Bcin02g07770 (MLST9), partial sequence [organism=Botrytis cinerea, strain D10\_B\_S6\_1]  
CAGCTTTCCCTTTCCGCTTAGCATCTACAGTCATTGCCATCCCTACACCATCACAACCTTGAGTCTCGGGCCGTTATCGATTCCGATGCCGTTG  
TAGGATTTGCCGAAACTGTTCCAGTGGGACCGTAGGAACAGTTTATGAGGCATATAAACCATTCCTTAAAGTCGTAAATGGATGCGTACCATT  
CCCTGCCGTCGATGCATCGGGTAACACAGGGTATGTCCCTTATACCATTCTCTTCCACACGATTGCTATTGAGTCTCTAACATATTTTAGTGGTG  
GTTTGTCAACCAACTGGCAGTAGCAATGGTGGTTGACGACGAGTACCGGTCAAGTATATGTTTCGAGGAGGACAAAGCGGATCAAACCTACGCCAT  
CATGTACTCCTGGTAAGTTCTCTCTAAACTTCTCCTTATAGATCCAACCTAACAAAATCTTAGGTACATGCCAAAGGACGAGCCCTCAACCGGT

ATTGGTCAACCGTCACGATTGGGAAGGTGTAATTTGCTGGCTCTCAAGCGCCACCGCCACAACCTGCCGACAACATCTTAGCCGTTTTGTCCCTCCG  
CCCACGGAGGCTGGGATTGTTCCACCGATGGATATTCCTTTCTGGTACCAGCCCTCTTATCAAGTACGAAAAGTATCTGGCCCGTCGATCATTC  
AATGGGTCTTACTAGTACTGTTGGTGGAAAAACAACCTATGATTGCTTGGGAGTCTTTACCAACTGCTGCTCAAACCTGCTCTTGAGAACACCGAT  
TTCGGTGTGCGAATGTTCCATTTCATTCGGCTGTTTTTCACAGATAATCTT

>Bcin04g02090 (MLST10), partial sequence [organism=Botrytis cinerea, strain D10\_B\_S6\_1]  
CGGAGGATGATATGGCAAAGTCTATGATTACCAAAGCATTTGTAGGCATGAGTAGTAAACTGTCGAATATGACTATGAATGATGTTTTACAAGCC  
CTACATCCATGTAAGAAAATGTAGAATAGAGAGATCAGTAACTGGAACATAATATCGTTTTGTAGGCTTTCAAGTTACTTACGCAGTTCAACCCAAT  
CACTACAGCTATTGCCGAATCCCCTACTATTTCAAATGGCTGTCTCAGCAAATACCATCGAAAAGTACACACTGCTAGGCCCTTTCTTCAGAATA  
TCTCCTCTGCAACAGGAAGTTACCAGGGAATACTTCAGTGCGCCAAAGACGATAGATAGACGACACATTGCCACATCTCAAGATGCGTTACGAT  
TAACCTTACAAAACCCATCAAAAAAGATTTACTTTGATATCATCAACCACTTTGTTCGAGCAAGTCCAATCGCAAAAAGCAAAACCCCTGGATTGGTT  
CGCTACATTGTGAATCAAAAATCACAACGTCGAGCACTTCAGGTAGACCCGAAAGAAGTGTCTTCTGATGGCTTTATGCACAATGTCACCTGTC  
GTTCTAGATGGTCTTTGTGAGCCATTTCATGGATACCACATTTCTCGAAAATTTCAAGATTGATATTGATTATCTAAGACGTGCGCCTCGTGTAG  
ATATCAAGGACGAGACCAAGTTGAACGCTGATGAGAAAGGCTTCTGAGAAATATTATGAGGACACTGTTCCCTGGCACCTTAATTTTCATCTCTGA  
GGTCTTCTTTCTGACATTGGCTGCTCATATTATGGTAGTGAAGCTCTTAATGCCACGCATAAGAGTCTGGAGAAAGACATCAAATATATTTCAA  
AAGCAATTGACTGCCGTTGAAGCA

>Bcin01g07220 (MLST1), partial sequence [organism=Botrytis cinerea, strain D10\_K\_S11\_06]  
GATGGCACATCTTGTCTTTCTTTTCGCATTATGCTTTGGAACGTGCTGGGCAAGCTTGGGTTAGTGTCTGCGTGTAGAAGCACTAAAGAAGATTC  
TCGCACAACCGAAGTCATGGTTTGAGGAATCCAGGAATTCACCTAGCCGTTGAACGAAGTTTTGGATAGGAACCTGAGGAAATGCGTAATCT  
CGTTGGCCGCTTTGCTGGTATTGTATTACAGCATTTTTTATGCTATTGATATCAATCATTTGGGCTTTCTGTAATACATGGAAACGACATTA  
GTCTCAATGGCAACTGGGCCAGTTATATACGCTGTCACCAAAACGTTCAATCGCGTGAGTGGAAAATGGGAGAACAAAGTGAACCTACGCATCTG  
AAATGACCACTGGCATATTTTCAGAGACTTTCTCCAACATCAAAGTGGTTTCGGGCTTTTACTCTGAAAACCTACTTTGAGACAAAACACACCAA  
AGCTACAGAAGAACTCTATAAAGTTGGACTAATACGAGCAAACCTACTCGGGATTGCTGTGGGGATTGACAGATGCGATGTCATTTTCATCACT  
GCAACTATCTTTTATTATGCCACGGTTCTCATTACCAAGAGAGAGATCAGTATTGCGACTGCACTACAGACTGTCAATCTTCTATTATTTGGTA  
TTTTTAATAGTACGAATATGCTGGCATGATACCACAAAATCAACTCTTCTCGCGTTACAGCTACGCATATGCTTGCATTAGCCAATCTCGATTCA  
TCTTCTCCACGAAAATAAAGGAACCGAACGGCTTTTCGACAATCTTTCCAATCAAATTCACCGTCTTTTCATTACATACCCCTACTCGTCCG  
AAAAACGAACGATATCATCTTTCTCTTTCCCTGATTCTTAACCAACTGCACCTTGTGCGACCCCTCCGGCTCCGAAAATCTACGATAGC  
TGCTCTGCTCATTGGTCTCTATCCGCCAGATACTTCAACACCTCCACCGTTGACATTCAATCGCGTCTCCATAAGTAACGTGCACATTCGGTCT  
CTCCGGGCTTCTCTCACTCGTCCCACAAAATACCGATTCTATTTCCAGCTACCATTTCTCCATAACATCATTTATGGTCTCCAGAACTTCTCTCT  
TGTGCTAGTCTTCCATCTGCTATTGCATCAGCAAAAGATGCTGGGATCCATGAATTTATCACATCGCTTCCACAAGGTTATGATACTAT

>Bcin05g07690 (MLST2), partial sequence [organism=Botrytis cinerea, strain D10\_K\_S11\_06]  
CACCCTATCACCAAGTCCCTTTCTGCACTTTCTCATCAAAAACGAACGAGAATCATCAATAAAATACCTTGTGTAAGTAATGGGTTTTAT  
TTTGCCAGGATGCCTTCTCTACGACAGCAAGCTTCGATGATATGTTGTGGTAGTCTTGGCTGGCTGGATACTGTCAAATTCATTGATT  
TACATTCTGAATTGCACTATTCAAACGACTCTCAGCCAGAAATGGTACGGACAACAATATAAACCCTGCATTTGCACATCGAGCGGACTATTTTG  
GGAATTGGCTTCACAAGGATGGGATACTACTCTCTGTGGTGGTGGGATGATATGGTACCATAACCTTACTCCATAACAAGAAATGCAATTACCAAT  
GAACTCTATATCGCAGCTTCGATATCGATGTACCTCTATTTCCCGGAGATGACAATCAATCCCATTTATGCTTTCCAACCTTCATATCCAC  
CTCACGATCCGAAATATCTACAGGCAGCTGTTGATGCTTACAAAATGGCTGAATGGTTCCAACATGACGGATTTACAAGGATATATGTGCGACGG  
GTATCATATCTCGAATCTTTCTGGCGGTGAAAAACCCCATTTGCGATTCTAGAAAATGAGATGGTATATACCTACAATCAAGGTGTTTTGCTTACT  
GGACAACGTGGTTTTGTATGACGCAACCGCCGCACGATCATACCTTGTGGATGGCCACAACTCATCGCAATGTTATTAATGCCACAGGCTATG  
ACCTGAAACACAATGTTGCCATCTCACGCCACCCAAAGATGGTTCGCAATGGCAAAGTGGTTTTGGCTGGGTAGGAATGGAATACTGGAAGA  
AGGATGCGATTCAAGTGTCTCGTGTCTCAAAATGGACAACTTTCAAAGGCATATTTCTTACCACCTTGATTGCGTCTGTAGTATTTGCCA  
GGGGAGCTTATTGCAGGGACGAAGGAAGGCTTAGAACTCGACAGAGTGTGGCATTTGACAAAATGCTCACAGTATACAAAATGGA

>Bcin06g01710 (MLST3), partial sequence [organism=Botrytis cinerea, strain D10\_K\_S11\_06]  
GGTGAGTCTGACTTTTTGTATTTGAGCGTTAAGATGGACACTGATGTACCAAGGCAATCACCTAATTTTCATGGCGTTCTTCCCTGCATCATCTAC  
CTACCCTGGAATGCTGGGAGAATTATACTCAGCAGCTTTACAGCTCCTGCTTTCAATGGATCTGTTCCCTGCTGTGACAGAATGGAGACG  
GTTGTAATGGATTGGTTGGCCAAGCTTCTCAATCTCCAGACTGTTATTTGTGCTGACTCATGGTGGTGGTGTATCCAAGGATCAGCCTCGG  
AAGCTATCGTTACCGTTATGGTTGCTGCCCGCGATAAGTATCTTCGTGAAACCACTGAAGGTCTGTGCGGAATGAACTCGAGGATGCGATTGC  
ATATAAGAGGAGTAAGCTAGTTGCACTAGGAAGCGAAAATGGCACACAGCTCCACGCAGAAAGCAGCGCAGATAGCTGGCGTTAGATTCCGATCG  
ATTCCAGTACTCGCATCCAATGATTTCCGATGACGGGTGATGATTTAGAGAAGGTATTGAAAGAATGCAAATCTCAAGGATTGGAACCTTCT  
ATCTAACTTCGACGTTGGAAACAACATCTACATGCGAGTTGACGACTTCGCATCTATTGCAACAGTACTTTCAAAAATATGCACCTCCAGATGT  
TGCAGGCGAGATCTGGGTTACGTCGATGCTGCTTATGCAAGTGCAGCTTTGGTTTTGCCCTGAATACCATCATCTAACATCGTCTTCCAGCAT  
TTCCATTCTTTGATATGAACATGCACAAAATGGCTTCTGACAAAATTTGACGCTTCTTGCCTATATGTCAAGAAACGCAAGATCTGATCGATG  
CACTCTCCGTAACACCAAGTTATCTTCCGAACGAGTTTTTCAGAGAGTAGACTCGTAACCGACTATCGGGACTGGCAAATTCCTCTCGGAAGACG  
TTTCCGAAGCTTAAAGATTTGGTTGTCTCAGAACCTAC

>Bcin09g03030 (MLST4), partial sequence [organism=Botrytis cinerea, strain D10\_K\_S11\_06]  
ACCCTTCAACCCACCGCAGCTCCTATACCGAAAAGCGAGTATCCTACCAATTCTCCTTCCACCTGCGACTTTAAGACCATTGGCTTTTTCGCACC  
TTCACAAAAAAGCATAGTTTAAACATTGACGTCGTCGGCATTACAAGTGTGGCTACTTTTATTGGAAAGCATTTGTGGGACAGGATGGAGGGAGG  
AAGGACTGGCAGAGAGAGTCTTGGAGGAGGTCGCCAAGAGTTGGAAGAATAGGAGTGGCGGTGTCAATTGTTCGAGGGCAGGGAAACGGAATTGAA  
GGAGATTCTGAAAGCTTTGGAAGGGAATATGAGTGGTGAAGGATAGTCATAGGAAGAGAGCTAAGCCGGCAGAATAGTTTAGTACTGGGATCA  
TCACAATATGGAGAGGTCAATCATAACAAGACTTGGGCTACGGCCAGGGAAATATACCCAGAGAGGATAGTCAGTCAAGTTTGGGAATGTCAACGT  
TGGAGGTCAATGACGAGGAAGATGAGGATGGCCTGATGGATCCAAGAAGGTGGTTAAAAGTCGTTGATGCATTTGAGCAACCTCGACTGGTGT  
CAATGTTGCTAAAAAGCACTTTGATAGGTATGTTTCAATGATAAAAATTTTATCTGAATCGACTAACTCAGTACAGAGATACCTCCAAACCTTCA  
TTGTTCCCACCTGCGTCTCATAAAACACTCCTCTTCCAAAACCGCTATAATGTTATCCATCAACGTCTCCTTCGCAATGAATCTTTTCAAACGC  
CCGCTTTTCAAGGTGGCAAAATCTTCCCTTCAACGCAGCACGTCCGCCATTACCACCCAACAACAATCATACAAATTAACGCCGATAGCTAATCT  
TCTCGGTGCGCAATCGCAGCTCTCATATGCTTCTCGGTCTCCTCAGTATTTACCCACTGGTACCCTCGCCATCAATGACCTGACGGGCAGTATC  
GCTCTTGATCTTACACACGCAGCAGCCATTC

>Bcin11g01310 (MLST5), partial sequence [organism=Botrytis cinerea, strain D10\_K\_S11\_06]  
ACTGACATGGACCTCATGTGGAACCGGCTAGAAATGCGCAACGCTTGAAGTTCCGCTCGAATATGGCGATGCAACGTCAACGGCAAAAGCCAGT  
GTTGCGCTTGCTCGTTATCCTGCCACTGTTGCCGCGAGCAAGAAGCTCGGGTCTCTCTTGATAAAATCCCGGTGGACCCGGTGCCCTGGTGTG  
GCTTTGTGAGTCTGGAGCCGGTGCCGCCGTCTCGACACTGAGTGGTGGATTATACGATATCATCGGATGGGATCCACGTGGAACCGGTGCTTC  
GGCTCCTATTTTGGAAATGTTTTGCAAATGCCAGTGGGAGTATGATTTTAAACAACGCGTTTCCATCTGCTCCGAATCTCTGGCTCGGACAATTT  
GCGAATGCCAGCGCAAATCTGCTGTTAGCTCTGCTATCACATCCTTTGACACTTCTGTGCTGCTCTTGCAAAAAGCTTGCCTGGCTCAGAAAT  
CTCCCGCTCTTTACACCTCAACAGCAGCATATGTTGCTCGAGACATGGCAGCGATAGTCGATGCATTTGGATGGGACCTCTGCAAACTTAACTA  
CTGGGGTTTCTCATATGGAACATCTTCCCTAGCTGAGTTTATCCAACTTTCCAGGCCGCGTGGGAAGAGTTCTTGCCGATGGTGTTCGCAC  
GCAAAGGCAAATGCACTCACATACGTTAGCCAACCTTCCCAACGATCAACTCAGTGTTCGTGCTTGGTTGAACGATTTTGCAGCTTTCTGCACCA  
CCGCCGGTAGTAAAGGTTGCTCTTTTGCACCGCCCTACTGGAACCTCAGGTAAGTGTGCTACCAGACTGGACAACATAATGAAGGATATGTT  
CCTCAATCCTATTGTTGCTTCGGGCTTGAGCATCAG

>Bcin15g03910 (MLST6), partial sequence [organism=Botrytis cinerea, strain D10\_K\_S11\_06]  
GCCAAAACACAAAATCATCCAACGATGAAGATGATACTCCACTTCCCTTGATTATCTGGCATGGACTCGGCGATAAATTACAAAGCGGATGGTCT  
TGCGCAAGTTGGAAAAGTAGCTGAAGCTATTCATCCTGGGACTTTTGTCTATAAATATTCATGTAGATGAGGATGCATCTGCAGATAGGACAGCT  
ACCTTCTTTGGAAAATCTCACTCGTGAGTACATCCCTATTTTTTCTTTAAATACCATACTAACTCTCTTACCAAGTTCAAAATCGAAAAGGTCTG  
CGAAGACCTCGCCTCCCATCCTATTTCTCTTACCAGCGCCCGCGTGCAGCAATTGGATTCTCCCAAGGCGGCAATTCTTGCGCGGTTACATA  
TCCCCTGCAATGCTCCACCCATCCGCTCTCTCTGACCTTCGGTTCCCAACACAACGGCATTCTGCTTCCAAGCCTGTGGTCCGCGATT  
TCCCTCTGTGCGGGTGTCAAACCTTTTGGCATCCAACACCTGGTCAACCTTTGTCCAATCTCGTCTCGTACCTGCTCAATACTTCAGAGATCC  
GGAAAACCTAGACTCTTACCTTGAATATTTCAATTTCTTGGCGACATCAATAATGAGCGGTTCTCAAGAACCAAACATATAAATCCAACATG  
GAAAAATTGGAACGATTGTAATGTATGCTTTGAAAGCAGATACAACTGTCATCCCTAAGGAAAGTGGATGGTGGGCTGAAGTCAATGGCACGG  
AAGTTACACCACTGAAAAGAAAGAGCCATTTATAAAAGAAAGATTGGCTAGGGTTAAAGACATTGGATGAGGCCGAAAAATTAGTTTTTCGAAACCAT  
TCCAGGGGGACATATGACGTTAGGAGAGGAGATGCTAGAGAAGGCTTTCAAAGAGTACTTTGGTCCAGCAGGGAAAAAATTTGGG

>Bcin16g03460 (MLST7), partial sequence [organism=Botrytis cinerea, strain D10\_K\_S11\_06]  
CATGAACCTCTTAATTTGAACTCTTCATTAATTGCAAGTGATGAACCCCTATTTCTGCCAGAGGATAGTTACAAGACGTATATCATTAGTTCGAG  
AACCCTCATGATATACATTGACGGATTTTTGAAAGCGAATGAAAGTAAACACTTGGTTGATGTTAGGTGTGTTATTTATTTCTGATGAAATGAA  
CAAGAGAGACTGATGAGATAGTGAACCGCTTATGAACCGTCTACTGTTTCTCACGGACAGGAAGTTACCATTGATCCTTCGGTTCGAAATTTCT  
GAAGTGGCGGTTTTAGAGAGGGATGAGGTGGTCAAGTGTATTGAGCATAGAGCGAGGGCATTTCAGGGGTGGAGGGGCGAGATGGGGATTGAGA  
AGTTGAGGACGCAGAGGTATGGGGTTGGAGGACATTATGGGATGCATTTGTAAGTTTTGGGGGATTGACGAAGGCCTCTGTTTTATTTCTATCA  
GTACGGATCTTGAAGAAAAGATAGCATGAACACGAGGGCTAATAACTAGGAAATAGCGATTGGAGCGGAGGTAAACGTGGCATAGACCGATTTA  
GTACTTTCATGGTCTATGTCGACGCATCCTCTGATATCGAAGGTGGAGGAACGGAAATCCCACGTATTGTGGGACCAAAGGAGGAAGGTGGGA  
GGACTTCTGGAAAATACGGAAGCATTTGGATCCAAGAACTGGAGAAAAATGTAACAGTAGAAGGGGTGACATTTCAAACCAATCAAGGAAATGCC  
GTATTCTGGGAAAATACTGACAACAACGGGAGGGGCTATGATG

>Bcin12g03020 (MLST8), partial sequence [organism=Botrytis cinerea, strain D10\_K\_S11\_06]  
ATCGATTGGCTGCGAAGAAAAGTGCAGCAGCCGAGTACCAAAAAGCACGAAATAAACCATCGGCAAGGGAAATATTCTCTGAACCACAACATGA  
CACGAGCGCGAAGAGTATATCGGGCGAGAAGCTTCATCAAGAGCACCAAAGCGACAACGAGTCGATGATAATTATAACTCTTACGGTGGAAAG  
AATGAGAATACAGCAGCTTATGCTTCCGGGAACTTCCATCTGGAAGTATAAATGTTGGTGGAGGTAGGAAGACCACATTTCAAGAAGAACCCTC  
GAACGGCATTGTGCTGGCAAGTTGCCCTTGGAAAGTATCAACATTTGGTGGAAAGAAAGGCTACCCAAATCGAGGACGAGGGTAGAGCAGCTTA  
TGCTTCCGGAAAAATGCCCCAGGAAGTATAAAACCTGGCGCAAAGAAAGGCGATTTCAATCCAAGATGAAACGAGACCGGCTTATGTCTCTGGA  
AAGCTTCCACATGGTAGTATCGACGGTATGCGAAAACCGTAAATGGCTGCCGTCCACCGCGAAATGCTGAGGGTGGGAGGAAACCAGGCCAGG  
TTGTCTCTTCTATTCACATTCATCTACTTCAAAGAAAATTTTCGATGACCCGAAGAACAAGCGGAACCGGCAAAACCATCCAATGCACCT

TTGACAGAGGAAATGGCGACTTTCACCAATCTAGGGTTATCGAGAAGGCTTGCAGCCCATCTATCGACTAAACTCGATATGAAAGCCCCGACCG  
CCATTCAAAAAGCATCTGTGCAGCAGTTGGTATCGGACGATAGCGATGCTTTCATACAAGCAGAGACTGGATCTGGAAAAACTTTGGCATATCT  
ACTACCTATAGTCGAGCGAATATTAGCATTTGAGTGAGAATGGCGTACAAA

>Bcin02g07770 (MLST9), partial sequence [organism=Botrytis cinerea, strain D10\_K\_S11\_06]  
ACAGCTTCCCTTCGGTCTTGGCATCTACAGTCATTGCCATCCCTACACCATCACAACCTTGAGTCTCGGGCCGTTATCGATTCCGATGCCGTT  
GTAGGATTTGCCGAAACTGTTCCAGTGGGACCGTAGGAACAGTTTACGAGGCATATAAACCATTCCTTAAAGTCGTAATGGATGCGTACCAT  
TCCCTGCCGTCGATGCATCGGGTAACACAGGGTATGTCTTATACCATTCTCTTCCACACGATTGCTATTGAGTCTCTAACATATTTTAGTGGT  
GGTTTGTACCAACTGGCAGTAGCAATGGTGGTTGCAGCAGCAGTACCGGTCAAGTATATGTTTCGAGGAGGACAAAGCGGATCAAACCTACGCCA  
TCATGTACTCCTGGTAAGTTCTCTCTAAACTTCTCTTATAGATCCAACCTAACAAAATCTTAGGTACATGCCAAAGGACGAGCCCTCAACCGG  
TATTGGTCACCGTCACGATTGGGAAGGTGTAATTGTCTGGCTCTCAAGCGCCACCGCCACAACCTGCCGACAACATCTTAGCCGTTTGTCTTCC  
GCCCACGGAGGCTGGGATTGTTCCACCGATGGCTATTCCTTCTGGTACCAGCCCTCTTATCAAGTACGAAAGTATCTGGCCCGTCGATCATT  
CAATGGGTCTTACTAGTACTGTTGGTGGAAAACAACCTATGATTGCTTGGGAGTCTTTACCAACTGCTGCTCAAACCTGCTCTTGAGAACACCGA  
TTTCGGTGCTGCGAATGTTCCATTTCATTCGGGCTGTTTTCACAGATAATCT

>Bcin04g02090 (MLST10), partial sequence [organism=Botrytis cinerea, strain D10\_K\_S11\_06]  
CGGAGGATGATATGGCAAAGTCTATGATTACCAAAGCATTTGTAGGCATGAGTAGTAAACTGTCGAATATGACTATGAATGATGTTTACAAGCC  
CTACATCCATGTAAGAAAATGTAGAATAGAGAGATCAGTAACTGGAACATAATATCGTTTTGTAGGCTTTCAGTTACTTACGCAGTTCAACCCAA  
CACTACAGCTATTGCCGAATCCCCACTATTTCAAATGGCTGTCTCAGCAAATACCATCGAAAAGTACACACTGCTAGGCCCTTCTTTCAGAATA  
TCTCCTCTGCAACAGGAAGTTACCAGGAATACTTCAAGTGCGCCAAAGACGATAGATAGACGACACATGCCACATCTCAAGATGCGTTACGAT  
TAACCTTACAAACCCATCAAAAAGATTTACTTGTATATCATCAACCCTTTGTTTCGAGCAAGTCCAATCGAAAAAGCAAAACCCCTGGATTGGTT  
CGCTTACATTGTGAATCAAAAATCACAAACGTCGAGCACTTCAGGTAGACCCGAAAAGAGTGTCTTCTGATGGCTTTATGCACAATGTCACCTGTC  
GTTCTAGATGGTCTTTGTGAGCCATTTCATGGATACCACATTTCTGAAAATTTCAAGATTGATATTGATTATCTAAGACGTGCGCCTCGTGTAG  
ATATCAAGGACGAGACCAAGTTGAACGCTGATGAGAAGGCTTCTGAGAAGTATTATGAGGACACTGTTCTGGCACCTCTAATTTTCATCTCTGA  
GGTCTTCTTCTGACATTTGGCTGCTCATCATTTATGGTAGTGAAGCTCTTAATGCCACGCATAAGAGTCTGGAGAAAAGACATCAAATATATTTCAA  
AAGCAATTGACTGCCGTTGAAGCA

>Bcin01g07220 (MLST1), partial sequence [organism=Botrytis cinerea, strain D10\_KS12\_11]  
ATGGCATATCTTGTCTTCTTTCGCATTATGCTTTGGAACGTGCTGGACAGCTTGGGTTAGTGCTCTGCGTGTAGAAGCACTAAAGAAGATTTCTC  
GCACAACCGAAGTCATGGTTTGGAGGAATCCAGGAATTCACCTGGCCGTTGAACGAAGTTTTGGATAGGAACTCTGAGGAAATGCGTAATCTCG  
TTGGCCGCTTTGCTGGTATTGTATTCACAGCATTTTTTATGCTATTGATATCAATCATTGTTGGCTTTCGTGAATACATGGAAACTGACATTAGT  
CTCAATGGCGACTGGGCCAGTTATATGCGCTGTCACCAAAACGTTCAATCGCGTGTAGTGGAAAATGGGAAAACAAGTGAACCTACGCATCTGAA  
ATGACCACTGGCATAATTTTCAGAGACTTTCTCCAACATCAAAGTGGTTCGGGCTTTTACTCTGGAACTTACTTTGAGACAAAACACACCAAAG  
CTACAGAAGAACTCTATAAAAATGGACTAATACGAGCAAACCTACTCGGGATTGCTGTGGGATTGACAGATGCGATGTCATTCTTCATCACTGC  
AACTATCTTTTATTATGCCACGGTCTCATTACCAAGAGAGAGATCAGTATCGCGACTGCACCTGCAGACTGTCAATCTTCTATTATTTGGTATT  
TCTAATAGTACGAATATGCTGGCCATGATACCACAAATCAACTCTTCTCGCGTTACAGCTACGCATATGCTTGCATTAGCCAATCTCGATTTCAT  
CTTCTCCACGAAAATAAAGGAGCCGAACGGCTTTTCGACAATCTTTCCAATCAAATTCACAGTCTCTCATTCACATATCCTACTCGTCTGTA  
AAAACGAACGATATCATCCTTTTCTCTTCCCTGATTCCCTAACTCAACAACCTGCACCTTGTTCGGACCCCTCCGGCTCCGAAAATCTACAATAGCT  
GCTCTGCTCGTTGGTCTCTATCCGCCAGATACTTCAACACCTCCACCGTTGACATTCAAATCGTGTCTCCATAAGTAACTGTCACATTCGGTCTC  
TCCGGGCTTCTCTCTCACTCGTCCCAAAAATACCGATTCTATTTCCAGCTACCATTCTCCATAACATCATTTATGGTCTCCAGAACTTCTCTCC  
TTGCGCTAGTCTTCCATCTGCTATTGCATCAGCAAAGATGCTGGGATCCATGAATTTATCACATCGCTTCCAAAAGGTTATGATACTAT

>Bcin05g07690 (MLST2), partial sequence [organism=Botrytis cinerea, strain D10\_KS12\_11]  
CACCCTATCACCAAGTCCCTTTTCTGCACTTTCCTCATCAAAAACGAACGAGAACATCATCAATAAATACTTTGCTGAAGTAATTGGGTTTTTAT  
TTTGCCAGGATGCCTTCTCTCTACGACAGCAAGCCTTCGATGATATGTTGTGGGTAGTCTTGGCTGGCTGGATACTGTCAAATTCATTGATT  
TACATTCTGAATTGCACTATTCAAACGACTCTCAGCCAGAATGGTACGGACAACAATATAAACCTGCATTTGCACATCGAGCGGACTATTTTG  
GGAATTGGCTTACAAGGATGGGATACTACTCTCTGTGGTGGTGGGATGATATGGTACCATAACCTTACTCCATAACAAGAACGCAATTACCAAT  
GAACTCTATATCGCAGCTTCGATATCGATGTACCTATATTTCCCGGAGATGACAATCAATCCCCATTTATGATTTCCAACCTTCATATCCAC  
CTCACGATCCGAAAATATCTACAGGACGCTGTTGATGCTTACAAAATGGTGAATGGTTCACATGACGGATTACAAGGATTATATGTCGACGG  
GTACCATATCTCGAATCTTTCTGGCGGTGAAAACACCCATTGCGATTCTAGAAAATGAGATGGTATATACTTACAATCAAGGTGTTTTGCTTACT  
GGACAACGTGGTTTTGTATGACGCAACCGCCGACGATCATACTTGTAGATGGCCACAACTCATCGCGAATGTTATTAATGCCACAGGCTATG  
ACCTGAAAACAAATGTTGTCATCTCACCGCCACCCAAAAGATGGTTCGGCATTTGGCAAAGTGGTTTTGGCTGGGTAGGAAATGGAATACTGGAAGA  
AGGATGCGATTCAAGTCTTCGTGTTCTCAAAAATGGACAACTTTCAAAGGCATATCTTTTCATCACTTGATTGCGTTCTGTAGTATTTGCCA  
GGGAGCCTATTGCAGGGACGAAGGAAAAGCTTAGAACTCGACAGAGTGTGGCATTTGACAAAATGCTCACAGTATAAAAATGGATCAGGCGAA  
ATGCCGAA

>Bcin06g01710 (MLST3), partial sequence [organism=Botrytis cinerea, strain D10\_KS12\_11]

GTGAGTCTGACTTTTGTGTTTGGAGCGTTAAGATAGACACTGATGTACCAAGGCAATCACCTAATTTTCATGGCGTTCCTCCCTGCATCATCTACC  
TACCCTGGAATGCTGGGAGAATTATACTCAGCAGCTTTCACAGCACCTGCTTCAATTGGATCTGTTCCCTGCCGTGACAGAAATTGGAGACGG  
TTGTAATGGATTGGCTGGCCAAGCTTCTCAATCTCCAGACTGTTATTTGCTTCGACTCATGGTGGTGGTGTATCAAGGATCAGCCTCGGAA  
GCTATCGTTACCGTTATGGTTGCTGCCCCGATAAAATATCTTCGTGAAACTACTGAAGGTCTGTCCGGCATTGAACTCGAGGATGCGATTGCAT  
ATAAGAGGAGTAAGCTAGTTGCACTAGGAAGCGAAATGGCACACAGCTCCACGCAGAAAGCAGCGCAGATAGCTGGCGTTAGATTCCGATCGAT  
TCCAGTACTCGCATCCAATGATTTGCCATGACGGGTGATGATTTAGAGAAGGTATTGGAAGAATGCAAATCTCAAGGATTGGAACCTTCTAT  
CTAACTTCGACTTTGGGAACAACATCTACATGCGCAGTTGACGATTTTCGCATCTATTGCAACAGTACTTTCAAAATATGCACCTCCAGATGTTG  
CAGGCGAGATCTGGGTTACGTCGATGCTGCTTATGCAGGTGCAGCTTTGGTTTGCCTGAATACCATCATCTAACATCGTCTTCCAGCATTT  
CCATTCCTTCGATATGAACATGCACAAATGGCTTCTGACAAATTTGACGCTTCTTGTCTATATGTCAAGAAACGCAAAGATCTGATAGATGCA  
CTCTCCATAACACCAAGTTATCTTCGCAACGAGTTTTTCAGAGAGTGGACTCGTAACCGACTATCGGGATTGGCAAATTTCCCTCGGAAGACGCT  
TCCGAAGCTTAAAGATTTGGTTTGTCTCAGAACCTAC

>Bcin09g03030 (MLST4), partial sequence [organism=Botrytis cinerea, strain D10\_KS12\_11]  
ACCCTTCAACCCACCGCAGCTCCTATACCGAAAAGCGAGTATCCTACCAATTTCTCTTCCACCTGCGACTTTAAGACCATTGGCTTTCCGCACT  
TTCACAAAAAAGCATAGTTTAAACATGACGTCGTCGGCATTACAAGTGTGGCTACTTTATTTGGAAAGCATTTGTGGGACAGGATGGAGGGAAGAA  
GGACTGGCAGAGAGAGTCTTGGAGGAGTCCCAAGAGTTGGAAGAATAGGAGTGGCGGTGTCATTGTCGAGGGCGAGGGAACGGAATTGAAGG  
AGATTCTGAAAGCTTTGGAAGAGAATATGAGTGGTGAAGGATAGTCATAGGAAGAGAGCTAAGCCGGCAGAATAGTTTTAGTACTGGATCATC  
ACAATATGGAGAGGTCAATCATAACAAGACTTGGGCTACGGCCAGGGAATATACCCAGAGAGGATAGTCAGTCAAGTTTGGGAATGTCAACGTTG  
GAGGTCAATGACGAGGAGGATGAGGATGGCCTGATGGATCCAAGAGGTGGTTAAAAGTCATTGATGCATTTGAGCAACCTCGACTGGTGTACA  
ATGTTGCTAAAAAGCACTTTGATAGGTATGTTTCAATGATAAAAATTTTATCTGAATCTACTAACTCAGTACAGAGATACTCCAAACCTTCATTG  
TTCCACCTGCGTCTCATAAAACACTCCTCTTCCAAAACCGCTATAATGTTATCCATCAACGTCTCTTCGCAATGAATCTTTTCAAACGCCCG  
CTTTTCAAAGTGGCAAATCTTCCCTTCAACGCAGCACGTCGCCATTACCACCCAACAACAATCATACAAATTAACGCCGATAGCTAATCTTCT  
CGGTCGCAATCGCAGCTCTCATATGCTTCTCGGTCTCCTCAGTATTTACCCACTGGTACCCTCGCCATCAATGACCTGACGGGCAGTATCGCT  
CTCGATCTTACACACGCAGCAGCCATTC

>Bcin11g01310 (MLST5), partial sequence [organism=Botrytis cinerea, strain D10\_KS12\_11]  
GCTGACATGGACCTCATGTGGAACCGGCTAGAATGCGCAACGCTTGAAGTTCGCTCGAATATGGCGATGCAACGTCAACGGCAAAGCCAGT  
GTTGCGCTTGCTCGTTATCTGCCACTGTTGCCGCGAGCAAGAAGCTCGGGTCTCTTTGATAAACCCCGGTGGACCCGGTGCCTCTGGTGTG  
GCTTTGTGCACTCTGGAGCCGGTCCGCCGCTCGACACTGAGTGGTGGATTGTACGATATCATCGGATGGGATCCACGTGGAACCGGTGCTTC  
GGCTCCTATTTTTGGAATGTTTTGCAAATGCCAGTGCAGGATGATTTTTAACCAACGCGTTTCCATCTGCTCCGAATCTCTGGCTCGGACAATTT  
GCGAATGCCAGCGCAAATTTCTGCTGTAGCTCTGCTATCACATCCTTTGACACTTCTGTGCTGCTCTTGCAAAGCTTGCCTGGCTCAGAAAT  
CTCCCGCTCTTTACACCTCAACAGCAGCATATGTTGCTCGAGACATGGCAGCGATAGTCGATGCATTGGATGGGACCTCTGCAAACCTTAACTA  
CTGGGGTTTCTCATATGGAACATATCTTCCCTAGCTGAGTTTATCCAACTTTCCCAAGCCGCGTGGGAAGAGTTCTTGCCGATGGTGTTCGCAC  
GCAAAGGCAAATGCACTCACATACGTTAGCCAACCTTCCCAACGATCAACTCAGTGTTCGTGCTTTCGTTGAACGATTTTGCAGCTTTCTGCACCA  
CCGCCGCTAGTAAAGGTTGCTCTTTTGCACCGCCCTACTGGAACCTCAGTACTGTTGCTACCAGACTGGACAGCATAATGAAGGATATGTT  
CCTCAATCCTATTGTTGCTTCGGGCTTAAAGCATCA

>Bcin15g03910 (MLST6), partial sequence [organism=Botrytis cinerea, strain D10\_KS12\_11]  
CGCAAAACACAAAATCATCCAACGATGAAGATGATACTCCACTTCCCTTGATTATCTGGCATGGACTCGGCCGATAAATTACAAAGCGGATGGTC  
TTGCGCAAGTTGGAAAACTAGCTGAAGCTATTCATCCTGGGACTTTTGTCTACAATATTCGTGTAGATGAGGATGCATCTGCAGATAGGACAGC  
TACCTTCTTTGGAAATCTCACTCGTGAGTACATCCCCTATTTTTCTTAAATATCATACTAACTCTCTTACCAAGTTCAAATCGAAAAGGTCTG  
CGAAGACCTCGCTCCATCCTATTTCTCTTACCAGCGCCCGCTCGACGCAATTGGATTCTCCCAAGCGGCCAATTTCTTGCCTGGTTACATA  
TCCCCTGCAATGCTCCACCATCCGCTCTCTCTGACCTTTGGTTCCCAACACAACGGCATTCTGCTTCCAAGCCTGTGGTCTCGCGATT  
TCTCTGTGCGGGTCTCAAACCTTTTGCAGTCCAACACCTGGTCAACCTTTGTCCAATCTCGTCTCGTACCCGCTCAATACTTCAGAGATCC  
GGAAAACCTAGACTCTTACCTTGAATATTTCCAATTTCTTGGCGACATCAATAATGAGCGCGTTCCTCAAGAACCAAACATATAAAATCCAACATG  
GAAAAATTGGAACGATTCGTAATGTATGCTTTGAAAGACGACACAACCTGTCATTCCTAAGGAAAGTGGATGGTGGGCTGAAGCAACGGCACGGA  
AGTTACACCCTGAAAAGAAAGAGCCATTTATAAAAGAAGATTGGCTAGGTCTAAAAGACATTTGGATGAGGCGGAAAATTAGTTTTCGAAACCAT  
CCAGGGGGACATATGACGTTAGGAGAGGAGATGCTAGAGAAGGCTTTCAAAGAGTATTTTGGTCCAGCAGGGAAGAAATTTGGG

>Bcin16g03460 (MLST7), partial sequence [organism=Botrytis cinerea, strain D10\_KS12\_11]  
ATGAACCTCTTGATTTGAACTCTTCATTAATTGCAAGTGTGAAACCCCTATTTCTGCCAGAGGATAGTTACAAGACGTATATCATTTAGTCGAGA  
ACCCTCATGATATATATTTGACGGATTTTTGAAAAGCGAATGAAAGTAAACATTTGGTTGATGTTAGGTGTGTTATTTATTTCTGATGAAATGAAC  
AAGAGAGACTGATGAGATAGTGAACCGCTTTATGAACCGTCTACTGTTTCTCACGGCAGGAAGTTACCATTGATACTTCAGTTTCGAAATTTCTG  
AAGTGGCGGTTTTAGAGAGGGATGAGGTGGTCAAGGTGATTTGAGCATAGAGCGAGGGCATTTCAGGGTGGAGGGGCGAGATGGGGATTGAGAA  
GTTGAGGACGCAGAGGTATGGGGTTGGAGGACATTTAGGGATGCATTTGTAAGTTTTGGGGGATTGACGAAGGCTTTTGTCTATTTTCTACCAG  
TACGGATCTTGAAGAAAAGATAGCATGAACACGAGGGCTAATAACTAGGAAATAGCGATTGGAGCGGAGGTAACGTTGGCATAGACCGATTTAG  
TACTTTTATGGTCTATGTCGACGATCTCTGATATCGAAGGTGGAGGAACGGAATTTCCACGTGTCGTGGGACCAAAGGAGGAAGGTGGGAG



GACTTCCTGGAAACTACGGAAGCATTGGATCCAAGAAGCTGGAGAAAATGTGACAGTAGAAGGGGTGACATTCAAACCAATCAAGGGAAATGCCG  
TATTCTGGGAAATACTGACAACAACGGGAGGGGCTATGATG

>Bcin12g03020 (MLST8), partial sequence [organism=Botrytis cinerea, strain D10\_KS12\_11]  
CGATTGGCTGCGAAGAAAAGTGCAGCAGCAGTACCCAAAGCAGCAATAAACCATCGGCAAGGGAAATATTTCTCTGAACCACAACATGACA  
CGAGCGCGAAGAGTATATCGGGCGAGAAGCTTCATCAAGAGCACCAAAGCGACAACGAGTCGATGATAAATTATAACTCTTACGGTGGAAAGAAA  
TGAAAATACAGCAGCTTATGCTTCCGGGAAAAGTCCATCTGGAAAGTATAAATGTTGGTGGAGGTAGGAAGACCACCTTTTCAAGAAGAACCCTCGA  
ACGGCATTGTCGCTGGCAAGTTGCCCCCTGGAAAGTATCAACATTGGTGGAAAGAAAGGCTACCCAAATCGAGGACGAGGGTAGAGCAGCTTATG  
CTTCCGGAAAATTGCCCCAGGAAGTATAAACTCTGGCGCAAAGAAGGCGATTTCAATCCAAGATGAAACGAGACCGGCTTATGTCTCCGGAAA  
GCTTCCACATGGTAGTATCGACGGTATGCGAAACCGTGAAATGGCTGCCGTCCACCGCGAAAATTGCTGAGGGTGGGAGGAAACCAGGCCAGGTT  
GTCTCTTCTCTATTACATTCATCTACTTCAAAGAAAAGTTCGATGAACCAGAAAGCAAGCGGAACCGGCAAACCATCCAATGCGCCTT  
TGACAGAGGAAAATGGCGACTTTCACCAATCTAGGGCTATCGAGAAGGCTTGACGCCATCTATCGACTAAACTCGATATGAAAGCCCCGACGGC  
CATTCAAAAAGCATCTGTGCAGCAGTTGGTATCGGACGATAGCGATGCTTTCATACAAGCAGAGACTGGATCTGGAAAAGTTCGGCATATCTA  
CTACCTATAGTCGAGCGAATATTAGCATTGAGTGAGAATGGCGTACAAA

>Bcin02g07770 (MLST9), partial sequence [organism=Botrytis cinerea, strain D10\_KS12\_11]  
CAGCTTTCCCTTTCCGGTCTTGGCATCTACAGTCATTGCCATCCCTACACCATCACAACCTTGAGTCTCGGGCCGTTATCGATTCGGATGCCGTTG  
TAGGATTTGCCGAAAAGTGTCCAGTGGGACCGTAGGAACAGTTTATGAGGCATATAAACCATTCCTTAAAGTCGTAAATGGATGCGTACCATT  
CCCTGCCGTCGATGCATCGGGTAACACAGGGTATGTCTTATACCTTTCTCTTCCACACGATTGCTATTGAGTCTCTAACATATTTTAGTGGTG  
GTTTGTCAACCAACTGGCAGCAGCAATGGTGAATGCAGCAGCAGTACCGGTCAAGTATATGTTTCGAGGAGGACAAAGCGGATCAAACCTACGCTAT  
CATGTACTCTGGTAAGTTCTCTTTAAACTTCTCCTTATAGATCCAACCTAACAAAATCTTAGGTACATGCCAAAGGACGAGCCCTCAACCGGT  
ATTGGTCAACCGTACGATTGGGAAGGTGTAATTGCTGCTTCCAGCGCCACCGCCACAACCTGCCGACAACATCTTAGCCGTTTGTCTTCCG  
CCCACGGAGGCTGGGATTGTTCCACGGATGGCTATTCCCTTTCTGTTACCAGCCCTCTTATCAAGTACGAAAGTATCTGGCCCGTCGATCACTC  
AATGGGTCTTACTAGTACTGTTGGTGGAAAACAACCTATGATTGCTTGGGAGTCTTTACCAACTGCTGCTCAAACCTGCTCTTGAGAACACCGAT  
TTCGGTGTGCGAATGTTCCATTCATTCGGCTGTTTTTCACAGATAATCT

>Bcin04g02090 (MLST10), partial sequence [organism=Botrytis cinerea, strain D10\_KS12\_11]  
CGGAGGATGATATGGCAAAGTCTATGATTACCAAAGCATTGTAGGCATGAGTAGTAAATTTGTCGAATATGACTATGAATGATGTTTACAAGCC  
CTACATCCATGCAAGAAAATGTAGAATAAAGAGATCAGTAACTGGAACATAATATCGTTTTGCAGGCTTTCAGTTACTTACGCAGTTCAACCCAAT  
CACTACAGCTATTGCCGAATCCCCACTATTTCAAATGGCTGTCTCAGCAAATACCATCGAAAAGTACACACTGCTAGGCCCTTTCTTTCAGAATA  
TCTCCTCTGCAACAGGAAGTTACCAGGGAATACTTCAAGTGCGCCAAAGACGATAGATAGGCGACACATTGCCACATCTCAAGATGCGTTACGAT  
TGACCTTACAAAACCATCAAAAAGATTTACTTGTATATCATCAACCCTTTGTTTCGAGCAAGTCCAATCGCAAAAAGCAAAACCCCTGGATTGGTT  
CGCTTACATTTGTGAATCAAAAATCACAAGCGTCGAGCACTTCGGGTAGACCCGAAAAGAGTGTCTTCTGATGGCTTTATGCACAATGTCACCTGTC  
GTTCTAGATGGTCTTTGTGAGCCATTTCATGGATACCACATTTCTCAAAAATTTTCAAGATTGATATTGATTATCTAAGACGTGCGCCTCGTGTAG  
ATATCAAGGACGAGACCAAGTTGAACGCTGATGAGAAGGCTTCTGAGAAGTATTATGAGGACACTGTTCTTGGCACCTTCAATTTTCATCTCCGA  
GGTATTCTTTCTGACATTTGGCTGCTCATATTATGGTAGTGAAGCTCTTAATGCCACGCATAAGAGTCTGGAGAAAAGACATCAAATATATTTCAA  
AAGCAATTGACTGCCGTTGAAGCA

>Bcin01g07220 (MLST1), partial sequence [organism=Botrytis cinerea, strain D11\_H\_R3\_7]  
ATGGCATATCTTGTCTTTCTTTTCGCATTATGCTTTGGAACGTGCTGGGCAAGCTTGGGTTAGTGTCTGCGTGTAGAAGCACTAAAGAGATTCTC  
GCACAACCGAAGTCATGGTTTGGAGGAATCCAGGAATTCACCTAGCCGTTGAAACGAAGTTTTGGATAGGAACTCTGAGGAAATGCGTAATCTCG  
TTGGCCGCTTTGCTGGTATTGTATTACAGCATTTTTTATGCTATTGATATCAATCATTTGGGCTTTCTGTAATACATGGAAACTGACATTAGT  
CTCAATGGCAACTGGGCCAGTTATATACGCTGTCAACAAAACGTTCAATCGCGTGTAGTGGAAAATGGGAAAACAAGTGAACCTACGCATCTGAA  
ATGACCACTGGCATATTTTCAGAGACTTTCTCCAACATCAAAGTGGTTCGGGCTTTTACTCTGGAAAAGTACTTTTGGACAAAACACACCAAAG  
CTACAGAAGAACTCTATAAAGTTGGACTAATACGAGCAAACCTACTCGGGATTGCTGTGGGATTGACAGATGCGATGTCATTCTTCATCACTGC  
AACTATCTTTTATTATGCCACGGTTCTCATTACCAAGAGAGAGATCAGTATTGCGACTGCACTACAGACTGTCAATCTTCTATTATTTGGTATT  
TCTAATAGTACGAATATGCTGGCTATGATACCACAAATCAACTCTTCTCGCGTTACAGCTACGCATATGCTTGCATTAGCCAATCTCGATTTCAT  
CTTCTCCACGAAAATAAAGGAACCGAACGGCTTTTCGACAATCTTTCCAATCAAATTCACCCGTCTTTTCATTACATACCCCTACTCGTCTTGA  
AAAACGAACGATATCATCCTTTTCTCTTTCCCTGATTCTTAACCTCAACAACTGCATTGTGCGACCCCTCCGGCTCCGGAAAATCTACGATAGCT  
GCTCTGCTCATTGGTCTCTATCCGCCAGATACTTCAACACCTCCACCGTTGACATTCATCGCGTCTCCATAAGTAACCTGTCACATTCGGTCTC  
TCCGGGCTTCTCTCACTCGTCCACAAAATACCGGATTCTATTTCCAGTACCATTCTCCATAACATCATTTATGGCTCCCGAATCTTCTC  
CTTGTGCTAGTCTTCCATCTGCTATTGCATCAGCAAAGATGCTGGGATCCATGAATTTATCACATCGCTTCCACAAGGTTATGATACTAT

>Bcin05g07690 (MLST2), partial sequence [organism=Botrytis cinerea, strain D11\_H\_R3\_7]  
ACCCTATCACCAAGTCTTTTCTGCACTTTCCCTCATCAAAAACGAACGAGAATCATCAATAAATACTTTGCTGAAGTAATTGGGTTTTATT  
TTGGCCAGGATGCCCTTCTCTTACGACAGCAAGCCTTCGATGATATGTTGTGGTAGTTCTTGGCTGGCTGGATACGTCAAATTCATTGATTT  
ACATTTGAATTCACATTCAAAACGACCCCTCAGCCAGAATGGTACGGACAACAATAAAGCTGCATTTGCACATCGAGCGGACTATTTTGG

GAATTGGCTTCACAAGGATGGGATACTACTCTCTGTGGTGGTGGGATGATATGGTACCATACCTTACTCCATACAAGAATGCAATTACCAATG  
AACTCTATATCGCAGCTTCGATATCGATGTACCTCTATTTCCCCGAGATGACAATCAATCCCCATTTATGCTTTCCAACCCTTCATATCCACC  
TCACGATCCGAAATATCTACAGGCAGCTGTTGATGCTTACAAATGGCTGAATGGTTCCAACATGACGGATTTACAAGGATTATATGTCGACGGG  
TATCATATCTCGAATCTTTCTGGCGGTGAAAAACCCCATTTGCGATTCTAGAAATGAGATGGTATATACCTACAATCAAGGTGTTTTGCTTACTG  
GACAACGTGGTTTTGTATGACGCAACCGCCGACGATCATACCTTGTGGATGGCCACAACTCATCGCAATGTTATTAATGCCACAGGCTATGA  
CCTGAAACACAATGTTGTATCTCACCGCCACCCAAAGATGGTTCCGCATTGGCAAAGTGGTTTTGGCTGGGTAGGAATGGAATACCTGGAAGAA  
GGATGCGATTCAAGTGCTTCGTGTTCTCAAAATGGACAAACTTTCAAAGGCATATTTCTTTTCATCACTTGATTGCATTTCTGTAGTGATTGCCAG  
GGGAGCCTATTGACGGGACGAAAGAAGGCCCTAGAACTCGACAGAGTGTGGCATTCTGACAAATGCTCACAGTATACAAAAAT

>Bcin06g01710 (MLST3), partial sequence [organism=Botrytis cinerea, strain D11\_H\_R3\_7]

GTGAGTCTGACTTTTGTATTTGAGCGTTAAGATGGACACTGATGTACCAAGGCAATCACCTAATTTTCATGGCGTTCTTCCCTGCATCATCTACC  
TACCCTGGAATGCTGGGAGAATTATACTCAGCAGCTTTACACAGCTCCTGCTTTCAATTGGATCTGTTCCCTGCTGTGACAGAATTGGAGACGG  
TTGTAATGGATTGGTTGGCCAAGCTTCTCAATCTCCAGACTGTTATTTGTCGTCGACTCATGGTGGTGGTGTATCCAAGGATCAGCCTCGGA  
AGCTATCGTTACCGTTATGGTTGCTGCCCGGATAAGTATCTTCGTGAAACCCTGAAGGCTGTGCGGAATTGAACTCGAGGATGCGATTGCA  
TATAAGAGGAGTAAGCTAGTTGCACTAGGAAGCGAAATGGCACACAGCTCCACGCGAGAAAGCAGCGCAGATAGCTGGCGTTAGATTCCGATCGA  
TTCCAGTACTCGCATCCAATGATTTGCCATGACGGGTGATGATTTAGAGAAGGTATTGAAAGAATGCAAACTCAAGGATTGGAACCTTCTA  
TCTAACTTCGACGTTGGGAACAACATCTACATGCGCAGTTGACGACTTCGCATCTATTGCAACAGTACTTTCAAATATGCACCTCCAGATGTT  
GCAGGCGAGATCTGGGTTACGTCGATGCTGCTTATGCAGGTGCAGCTTTGGTTTGGCCCTGAATACCATCATCTAACATCGTCTTCCAGCAT  
TCCATTCTTTGATATGAACATGCACAAATGGCTTCTGACAAATTTGACGCTTCTTGCCATATATGTCAAGAAACGCAAAGATCTGATCGATG  
ACTCTCCATAACACCAAGTTATCTTCGCAACGAGTTTTCAGAGAGTGGACTCGTAACCGACTATCGGGACTGGCAAATTCCTCTCGGAAGACGT  
TTCCGAAGCTTAAAGATTTGGTTTTGCTCTCAGAACCCTAC

>Bcin09g03030 (MLST4), partial sequence [organism=Botrytis cinerea, strain D11\_H\_R3\_7]

ACCCTTCAACCCACCGCAGCTCCTATACCGAAAGCGAGTATCCTACCAATTCCTTCCACCTGCGACTTTAAGACCATTGGCTTTTTCGCACT  
TTCACAAAAAAGCATAGTTTAAACATTTGACGTCGTCGGCATTACAAGTGTGGCTACTTTTATTTGAAAGCATTGTGGGACAGGATGGAGGGAGG  
AAGGACTGGCAGAGAGAGTCTTGGAGGAGGTCGCCAAGTGTGGAAAGATAGGAGTGGCGGTGTCAATGTGTCAGGGGCGAGGGAACGGAATTGAA  
GGAGATTCTGAAAGCTTTGGAAGGGAATATGAGTGGTGAAGGATAGTTCATAGGAAGAGAGCTAAGCCGGCAGAATAGTTTAGTACTGGGATCA  
TCACAATATGGAGAGGTCAATCATAACAAGACTTGGGCTACGGCCAGGGAATATACCAGAGAGGATAGTCAAGTTTGGGAATGTCAACGT  
TGGAGGTCAATGACGAGGAAGATGAGGATGGCCTGATGGATCCAAGAAGTGGTTAAAAGTCGTTGATGCATTTGAGCAACCCTCGACTGGTGT  
CAATGTTGCTAAAAAGCACTTTGATAGGTATGTTTCAATGATAAAAATTTTATCTGAATCGACTAACTCAGTACAGAGATACCTCCAAACCTTCA  
TTGTTCCACCTGCGTCTCATAAAACACTCCTCTTCCAAAACCGCTATAATGTTATCCATCAACGTCTCCTTCGCAATGAATCTTTTCAAACGC  
CCGCTTTTCAAGGTGGCAAATCTTCCCTTCAGCGCAGCAGTCCGCCATTACCACCCAACAACAATCATACAAATTAACGCCGATAGCTAATCT  
TCTCGGTGCGCAATCGCAGCTCTCATATGCTTCTCGGTCTCCTCAGTATTTACCCCACTGGTACCCTCGCCATCAATGACCTGACGGGCAGTAT  
GCTCTTGATCTTACACACGCAGCAGCCATT

>Bcin11g01310 (MLST5), partial sequence [organism=Botrytis cinerea, strain D11\_H\_R3\_7]

ACTGACATGGACCTCATGTGGAACCGCGTAGAATGCGCAACGCTTGAAGTTCCGCTCGAATATGGCGATGCAACGTCAACGGCAAAGCCAGT  
GTTGCGCTTGCTCGTTATCCTGCCACTGTTGCCGCGAGCAAGAAGCTCGGGTCTCTTTGATAAAATCCCGGTGGACCCGGTGCCTCTGGTGTG  
GCTTTGTGAGTCTGGAGCCGGTGCCGCCGTCTCGACACTGAGTGGTGGTTATACGATATCATCGGATGGGATCCACGTGGAACCGGTGCTTCG  
GCTCCTATTTTGAATGTTTTGCAAAATGCCAGTGCAGGATGATGATTTTAAACAACCGGTTTCCATCTGCTCCGAATCTCTGGCTCGGACAATTTG  
CGAATGCCAGCGCAAATTTCTGCTGTTAGCTCTGCTATCACATCCTTTGACACTTCTGTGCTGCTCTTGCAAAGCTTGCCTGGCTCAGAAATC  
TCCCCTCTTTTACACCTCAACAGCAGCATATGTTGCTCGAGACATGGCAGCGATAGTGCATGATGGATGGGACCTCTGCAAAACTTAACTAC  
TGGGGTTTTCTCATATGGAATATCTTCTAGCTGAGTTTATCCAACTTTCCAGGCCGCGTGGGAAGAGTTCTTGGCGATGGTGTTCGACG  
CAAAGGCAAATGCACTCACATACGTTAGCCAACTTCCCAACGACCAACTCAGTGTTCGTGCTTCGTTGAACGATTTTGCAGCTTTCTGCACCAC  
CGCCGGTAGTAAAGTTGCTCTTTTGGCACCGCCCCACTGGAACCTCAGGTACTGTTGCTACCAGACTGGACAACATAATGAAGGATATGTT  
CTCAATCCTATTGTTGCTTCGGGCTTGAGCATCA

>Bcin15g03910 (MLST6), partial sequence [organism=Botrytis cinerea, strain D11\_H\_R3\_7]

GCCAAAACACAAAATCATCCAACGATGAAGATGATACTCCACTTCCCTTGATTATCTGGCATGGACTCGGCGATAATTACAAAGCGGATGGTCT  
TGCGCAAGTTGGAAAAGTCTGAGCTGAAGCTATTCATCTGGGACTTTTGTCTATAAATATTCATGTAGATGAGGATGCATCTGCAGATAGGACAGCT  
ACCTTCTTTGAAAATCTCACTCGTGAGTACATCCCTATTTTTCTTTAAATACCATACTAACTCTCTTACCAAGTTCAAATCGAAAAGGTCTG  
CGAAGACCTCGCCTCCCATCCTATTTCTCTTACCAGCGCCCGCTCGACGCAATTGGATTCTCCCAAGGCGGCAATTTCTTGGCGGTTACATA  
TCCCCTGCAATGCTCCACCATCCGCTCTCTCTGACCTTCGGTTCCCAACACAACGGCATTCTGCTTCCAAGCCTGTGGTCTGCGGATT  
TCTCTGTGCGGGTGTCAAACCTTTTGGGATCCAACACCTGGTCAACCTTTGTCCAATCTCGTCTCGTACCTGCTCAATACTTCCAGAGATCC  
GGAAAACCTAGACTCTTACCTTGAATATTTCAATTTCTTGGCGACATCAATAATGAGCGCGTTCTCAAGAACCAAACATATAAATCCAACATG  
GAAAAATTGGAACGATTGCTAATGTATGCTTTGAAAGCAGATACAACTGTCAATCCCTAAGGAAAGTGGATGGTGGGCTGAAGTCAATGGCACGG  
AAGTTACACCACTGAAAGAAAGAGCCATTTATAAAGAAGATTGGCTAGGGTTAAAGACATTGGATGAGGCCGAAAATTAGTTTTTCGAAACCAT

TCCAGGGGGACATATGACGTTAGGAGAGGAGATGCTAGAGAAGGCTTTCAAAGAGTACTTTGGTCCAGCAGGGAAAAAATTTGGG

>Bcin16g03460 (MLST7), partial sequence [organism=Botrytis cinerea, strain D11\_H\_R3\_7]  
ATGAACCTCTTAATTTGAACTCTTCATTAATTGCAAGTGATGAACCCCTATTCTGCCCAGAGGATAGTTACAAGACGTATATCATTTAGCCGAGA  
ACCCTCATGATATACATTGACGGATTTTTGAAAAGCGAATGAAAGTAAACACTTGGTTGATGTTAGGTGTGTTATTTATTTCTGATGAAATGAAC  
AAGAGAGACTGATGAGATAGTGAACCGCTTTATGAACCGTCTACTGTTTCTCACGGACAGGAAGTTACCATTGATCCTTCGGTTCGAAATTTCTG  
AAGTGGCGGTTTTAGAGAGGGATGAGGTGGTCAGGTGTATTGAGCATAGAGCGAGGGCATTTTCAGGGGTGGAGGGGCGAGATGGGGATTGAGAA  
GTTGAGGACGCAGAGGTATGGGGTTGGAGGACATTATGGGATGCATTTGTAAGTTTTGGGGAATTGACGAAGGCCTCTGTTTTATTTCTATCAG  
TACGGATCTTGAAAGAAAGATAGCATGAACACGAGGGCTAATAACTAGGAAATAGCGATTGGAGCGGAGGTAAACGTGGCATAGACCGATTTAG  
TACTTTTCATGGTCTATGTCGACGTATCCTCTGATATCGAAGGTGGAGGAACGGAAATTTCCACGTATTGTGGGACCAAAGGAGGAAGGTGGGAG  
GACTTCTGGAAACTACGGAAAGCATTTGGATCCAAGAACTGGAGAAAAATGTAACAGTAGAGGGGGTGACATTCAAACCAATCAAGGGAAATGCCG  
TATTCTGGGAAAAATACTGACAACAACGGGAGGGGCTATGAT

>Bcin12g03020 (MLST8), partial sequence [organism=Botrytis cinerea, strain D11\_H\_R3\_7]  
ATCGATTGGCTGCGAAGAAAACTGCGCAGCACCAGTACCCAAAAGCACGAAATAAACCATCGGCAAGGGAAATATTCTCTGAACCACAACATGA  
CACGAGCGCGAAGAGTATATCGGGCGAGAAGCTTCATCAAGAGCACCAAAGCGACAACGAGTCGATGATAATTATAACTCTTACGGTGGAAAGA  
AATGAGAATACAGCAGCTTATGCTTCCGGGAACTTCCATCTGGAAGTATAAAATGTTGGTGGAGGTAGGAAGACCACATTTCAAGAAGAACCCTC  
GAACGGCATTTGTGCTGGCAAGTTGCCCCCTGGAAAGTATCAACATTTGGTGGAAAGAAAGGCTACCCAAATCGAGGACGAGGGTAGAGCAGCTTA  
TGCTTCCGGAAAAATGCCCCAGGAAGTATAAACTCTGGCGCAAAGAAAGGCGATTTCAATCCAAGATGAAACGAGACCCGGCTTATGTCTCTGGA  
AAGCTTCCACATGGTAGTATCGACGGTATGCGAAACCGTGAATGGCTGCCGTCACCAGCGAAATGCTGAGGGTGGGAGGAAACCAGGCCAGG  
TTGTCTCTTCTATTTACATTTCAATCTACTTCAAAGAAAACTTTGATGAACCCGAAAGAACAAAGCGGAACCCGGCAAACCATCCAATGCACC  
TTTGACAGAGGAAATGGCGACTTTACCAATCTAGGGTTATCGAGAAGGCTTGCAGCCCATCTATCGACTAAACTCGATATGAAAGCCCCGACC  
GCCATTCAAAAAGCATCTGTGCAGCAGTTGGTATCGGACGATAGCGATGCTTTCATACAAGCAGAGACTGGATCTGGAAAAACTTTGGCATATC  
TACTACCTATAGTCGAGCGAATATTAGCATTGAGTGAGAATGGCGTACAAAT

>Bcin02g07770 (MLST9), partial sequence [organism=Botrytis cinerea, strain D11\_H\_R3\_7]  
CAGCTTTCCCTTTCCGGTCTTAGCATCTACAGTCATTGCCATCCCTACACCATCACAACCTTGAGTCTCGGGCCGTTATCGATTCCGATGCCGTTG  
TAGGGTTTTGCCGAAACTGTTCCAGTGGGACCGTAGGAACAGTTTATGAGGCATATAAACCATTTCCCTAAAGTCGTAAATGGATGCGTACCATT  
CCCTGCCGTCGATGCATCGGGTAACACAGGGTATGTCTTATAACCATTTCTCTTCCACACGATTGCTATTTGAGTCTCTAACATATTTTAGTGGTG  
GTTTTGTCACCAACTGGCAGTAGCAATGGTGGTTGACGACGAGTACCGGTCAAGTATATGTTTCGAGGAGGACAAAGCGGATCAAACCTACGCCAT  
CATGTACTCCTGGTAAGTTCTCTCTAACTTCTCCTTATAGATCCAACCTAACAAAATCTTAGGTACATGCCAAAGGACGAGCCCTCAACCGGT  
ATTTGGTCAACCGTCACGATTGGGAAGGTGTAATTTGCTGGCTCTCAAGCGCCACCGCCACAACCTGCCGACAACATCTTAGCCGTTTGTCTTCCG  
CCCACGGAGGCTGGGATTGTTCCACCGATGGATATTTCCCTTTCTGGTACCAGCCCTCTTATCAAGTACGAAAGTATCTGGCCCGTCGATCATTC  
AACGGGTCTTACCAGTACTGTTGGTGGAAAAACAGCCTATGATTGCTTGGGAGTCTTTACCAACTGCTGCTCAAACCTGCTCTTGAGAACACCGAT  
TTCGGTCTGCGAATGTTCCATTCATTCCGGCTGTTTTACAGATAATCT

>Bcin04g02090 (MLST10), partial sequence [organism=Botrytis cinerea, strain D11\_H\_R3\_7]  
CGGAGGATGATATGGCAAAGTCTATGATTACCAAAGCATTTGTAGGCATGAGTAGTAAACTGTCGAATATGACTATGAATGATGTTTACAAGCC  
CTACATCCATGTAAGAAAATGTAGAATAGAGAGATCAGTAACTGGAACATAATATCGTTTTGTAGGCTTTCAAGTTACTTACGCAGTTCAACCCAAAT  
CACTACAGCTATTGCCGAATCCCCACTATTTCAAATGGCTGTCTCAGCAAAATACCATCGAAAAGTACACACTGCTAGGCCCTTTCTTTCAGAATA  
TCTCCTCTGCAACAGGAAGTTACCAGGGAATACTTCAAGTGCAGCAAAAGACGATAGATAGACGACACATTTGCCACATCTCAAGATGCGTTACGAT  
TAACCTTACAAAACCATCAAAAAGATTTACTTGTATATCATCAACCACTTTGTTTCGAGCAAGTCCAATCGAAAAAGCAAAACCCCTGGATTGGTT  
CGCTACATTTGTGAATCAAAAATCACAAACGTCGAGCACTTCAAGTAGACCCGAAAGAAAGTGTCTTCTGATGGCTTTATGCACAATGTCACCTGTC  
GTTCTAGATGGTCTTTGTGAGCCATTTCATGGATACCACATTTCTCGAAAATTTGGAAGATTGATATTGATTATCTAAGACGTGCGCCTCGTGTAG  
ATATCAAGGACGAGACCAAGTTGAACGCTGATGAGAAGGCTTCTGAGAAGTATTATGAGGACACTGTTCTTGGCATTCTAATTTTCATCTCTGA  
GGTCTTCTTCTGACATTGGCTGCTCATTTATGGTAGTGAAGCTCTTAATGCCACGCATAAGAGTCTGGAGAAAGACATCAAATATATTTCAA  
AAGCAATTGACTGCCGTTGAAGCA

>Bcin01g07220 (MLST1), partial sequence [organism=Botrytis cinerea, strain D11\_KL\_tax4]  
ATGGCATATCTTGTCTTTTTCGCATTATGCTTTGGAACGTGCTGGACAAGCTTGGGTTAGTGCTCTGCGTGTAGAAGCACTAAAGAAGATTCT  
CGCACAACCGAAGTCATGGTTTTGAGGAATCCAGGAATTCACCTGGCCGGTTGAACGAAAGTTTTGGATAGGAACCTTGAGGAATGCGTAATCTCG  
TTGGCCGCTTTGCTGGTATTGTATTACACAGCATTTTTTATGCTATGATATCAATCATTGGGCTTTCTGTAATACATGGAAACTGACATTAGTC  
TCGATGGCAACTGGGCCAGTTATATACGCTGTCACAAAACGTTCAATCGCGTGTAGTGGAAAATGGGAAAACAAGTGAACCTACGCCCTTGAAA  
TGACCCTGGCATATTTTCAGAGACTTTCTCCAACATCAAAGTGGTTCCGGCTTTTACTCTGGAACTTACTTTGAGACAAAACACACCAAAGC  
TACAGAAGAACTTTGTAAAAGTTGGACTAATACGAGCAAACTACTCGGGATTGCTGTGGGGATTGACAGATGCGATGTCATTTCTATCCTGCA  
ACTATCTTTTATTATGCCACGCTTCTCATTACCAAGAGAGAGATCAGTATCGCGACTGCACTACAGACTGTCAATCTTCTATTTATTTGGTATTT  
CTAATAGTACGAATATGCTGGCCATGATACCACAAAATCAACTCTTCTCGGTTACAGTACGCATATGCTTGCATTAGCCAATCTCGATTTCATC

```
TTCTCCACGAAAATAAAGGAACCGAACGGCTTTCGACAATCTTTCCAATCAAATTC AACCGTCTCTCATTACATATCCTACTCGTCCTGAA
AAACGAACGATATCATCTTTTCTCTTTCCCTGATTCTTAACCACTGCACTTGTTCGACCCCTCCGGCTCCGAAAATCTACAATAGCTG
CTCTGCTCATTGGTCTTTATCCGCCAGATATTTCAACACCTCCACCGTTGACATTCAATCGCGTCTCCATAAGTAACTGTACATTTCCGTCTCT
CCGGGCTTCTCTCTCACTCGTCCCACAAAATACCGATTCTATTTCCAGCTACCATTCTCCATAACATCATTTATGGTCTCCAGAAATCTTCTCCT
TGTGCTAGTCTTCCATCTGCTATTGCATCAGCAGAAGATGCTGGGATCCATGAATTTATCACATCGCTTCCACAAGGTTATGATACATG
```

```
>Bcin05g07690 (MLST2), partial sequence [organism=Botrytis cinerea, strain D11_KL_tax4]
ACCCTATCACCAAGTCTTTTCTGCACTTTTCTCATCAAAAACGAACGAGAACATCATCAATAAAATACTTTGCTGAAGTAATTGGGTTTTATT
TTGGCCAGGATGCCTTCTCTCTACGACAGCAAGCCTTCGATGATATGTTGTGGGTAGTTCTTTGGCTGGCTGGATACTGTCAAATTCATTGATTT
ACATTCTGAATTGCACTATTCAAACGACTCTCAGCCAGAATGGTACGGACAACAATATAAACCTGCATTTGCACATCGAGCGGACTATTTTGG
GAATTGGCTTTCACAAGGATGGGATACTACTCTCTGTGGTGGTGGGATGATATGGTCACCATACTTACTCCATAACAAGAACGCAATTACCAATG
AACTCTATATCGCAGCTTCGATATCGATGTACCTATATTTCCCCGGAGATGACAATCAATCCCCATTTATGCTTTCCAACCCCTTCATATCCACC
TCAGATCCGAAATATCTACAGGCAGCTGTTGATGCTTACAAATGGCTGAATGGTTCCAACATGACGGATTTACAAGGATTATATGTCGACGGG
TACCATATCTCGAATCTTTCTGGCGGTGAAAAACCCCATTTGCGATTCTAGAAATGAGATGGTATATACCTACAATCAAGGTGTTTTGCTTACTG
GACAACGTGGTTTTGTATGACGCAACC GCCGACGATCATACCTTGTAGATGGCCACAAACTCATCGCAATGTTATTAATGCCACAGGCTATGA
CCTGAAACACAATGTTGTCATCTCACCGCCACCCAAAGATGGTTCCGCATTGGCAAAGTGGTTTTGGCTGGGTAGGAATGGAATACGGAAGAA
GGATGCGATTCAAGTGCTTCGTGTTCTCAAAATGGACAAAATTTCAAAGGCATATTTCTTTTCATCACTTGATTGCGTTCTGTAGTGATTTGCCAG
GGAGCCTATTGCAGGGACGAAGGAAAAGCTTAGAACTCGACAGAGTGTGGCATTCTGACAAATGCTCACAGTATACAAAAT
```

```
>Bcin06g01710 (MLST3), partial sequence [organism=Botrytis cinerea, strain D11_KL_tax4]
GTGAGTCTGACTTTTGTATTTGAGCGTTAAGATAGACACTGATATACCAAGGCAATCACCTAATTTTCATGGCGTTCTTCTGCATCATCTACCT
ACCCTGGAATGCTGGGAGAATTATACTCAGCAGCTTTCACAGCACCTGCTTTCAATTGGATCTGTTCCCCCTGCTGTGACAGAATTGGAGACGGT
TGTAATGGATTGGCTGGCCAAGCTTCTCAATCTCCAGACTGTTATTTGTCTTCGACTCATGGTGGTGGTGTATCCAAGGATCAGCCTCGGAA
GCTATCGTTACCGTTATGGTTGCTGCCC GCGATAAATATCTTCGTGAACTACTGAAGTCTGTTCGGGCATTGAACTCGAGGATGCGATTGCAT
ATAAGAGGAGTAAGCTAGTTGCACTAGGAAGCGAAAATGGCACACAGCTCCACGCAGAAAAGCAGCGCAAATAGCTGGCGTTAGATTTCCGATCGAT
TCCAGTACTCGCATCCAATGATTTTCGCCATGACGGGTGATGATTTAGAGAAGGTATTTGAAAGAATGCAAATCTCAAGGATTGGAACCCCTTCTAT
CCTAACTTCGACTTTGGGAACAACATCTACATGCGCAGTTGACGACTTCGCATCTATTTGCAACAGTACTTTCAAATATGCACCTCCAGATGTT
GCAGGCGAGATCTGGGTTACGTCGATGCTGCTTATGCAGGTGCAGCTTTGGTTTTGCCCTGAATACCATCATCTAACATCGTCCCTCCAGCATT
TCCATTCTTCGATATGAACATGCACAAAATGGCTTCTGACAAAATTTGACGCTTCTTGTCTATATGTCAAGAAAACGCAAAGATCTGATCGATGC
ACTCTCCATAACACCAAGTTATCTTTCGCAACGAGTTTTTCAGAGAGTGGACTCGTAACCGACTATCGGGACTGGCAAATTCCTCTCGGAAGACGC
TTCCGAAGCTTAAAGATTTGGTTTTGTCTCAGAACCCTAC
```

```
>Bcin09g03030 (MLST4), partial sequence [organism=Botrytis cinerea, strain D11_KL_tax4]
ACCCTTCAACCCACCGCAGCTCCTATACCGAAAAGCGAGTATCCTACCAATTTCTCCTTCCACCTGCGACTTTAAGACCATTGGCTTTCCGCACT
TTCACAAAAAAGCATAGTTTAAACATTGACGTCGTCGGCATTACAAGTGTGGCTACTTTTTATTGGAAAGCATTGTGGGACAGGATGGAGGGAAG
AAGGACTGGCAGAGAGAGTCTTGGAGGAGGTCGCCAAGAGTTGGAAGAATAGGAGTGGCGGTGTCAATTGTTCGAGGGCGAGGGAACGGAATTGAA
GGAGATTCTGAAAAGCTTTGGAAGGGAATATGAGTGGTGGAAAGGATAGTCAATAGGAAGAGAGCTAAGCCGGCAGAATAGTTTAGTACTGGGATCA
TCACAATATGGAGAGGTCATCATAACAAGACTTGGGCTACGGCCAGGGAATATACCCAGAGAGGATAGTCAAGTGTGGGAATGTCAACGT
TGGAGGTCAATGACGAGGAAGATGAGGATGGCCTGATGGATCCAAGAAGGTGGTTAAAAGTCAATTGATGCATTTGAGCAACCTCGACTGGTGTA
CAATGTTGCTAAAAAGCACTTTGATAGGTATGTTTCAATGATAAAAATTTTCATCTGAATCGACTAACTCAGTACAGAGATACCTCCAAACCTTCA
TTGTTCCACCTGCGTCTCATAAAAACACTCCTCTTCCAAAACCGCTATAATGTTATCCGTCAACGTCTCCTTTCGCAATGAATCTTTTCAAACGC
CCGCTTTTCAAAGGTGGCAAATCTTCCCTTCAACGCAGCAGCTCCGCCATTACCACCCAACAACAATCATACAAATTAACGCCGATAGCTAATCT
TCTCGGTGCGAATCGCAGCTCTCATATGCTTCTCGGTCTCCTCAGTATTTACCACCTGGTACCCTCGCCATCAATGACCTGACGGGCAGTATC
GCTCTCGATCTTACACACGCAGCAGCCATTCCC
```

```
>Bcin11g01310 (MLST5), partial sequence [organism=Botrytis cinerea, strain D11_KL_tax4]
ACTGACATGGACCTCATGTGGAACCGGCGTAGAATGCGCAACGCTTGAAGTTCCGCTCGAATATGGCGATGCAACGTCAACGGCAAAGCCAGT
GTTGCGCTTGCTCGTTATCTGCCACTGTTGCCGCGAGCAAGAAGCTCGGGTCTCTCTTGATAAACCCCGGTGGACCCGGTGCCTCTGGTGTG
GCTTTGTGCAGTCTGGAGCCGGTGCCCGCTCTGACACTGAGTGGTGGATTGTACGATATCATCGGATGGGATCCACGTGGAACCGGTGCTTC
GGCTCCTATTTTGGAAATGTTTTGCAAATGCCAGTGCAGGATATGATTTTAAACAACGCTTTCCATCTGCTCCGAATCTCTGGCTCGGACAATTT
GCGAATGCCAGCGCAAATTTCTGCTGTTAGCTCTGCTATCACATCCTTTGACACTTCTGTGCTGCTCTTTCGAAAAGCTTGGCTGGCTCAGAAAT
CTCCCGCTCTTTACACCTCAACAGCAGCATATGTTGCTCGAGACATGGCAGCGATAGTGCATGCATTGGATGGGACCTCTGCAAACCTTAACTA
CTGGGGTTTCTCATATGGAATATTTTCTAGCTGAGTTTATCCAACTTTCCAGGCCGTGTGGGAAGAGTTCTTGCCGATGGTGTTCGAC
GCAAAGGCAAATGCACTCACATACGTTAGCCAACCTTCCCAACGATCAACTCAGTGTTCGTGCTTCGTTGAACGATTTTGCAGCTTTCTGCACCA
CCGCCGGTAGTAAAGGTTGCTCTTTTGGCACCCGCCCTACTGGAACCTCAGGTAAGTGTGCTACCAGACTGGACAACATAATGAAGGATATGTT
CCTCAATCCTATTGTTGCTTCGGGCTTAAAGCATCA
```

>Bcin15g03910 (MLST6), partial sequence [organism=Botrytis cinerea, strain D11\_KL\_tax4]  
GCCAAAACACAAAATCATCCAACGATGAAGATGATACTCCACTTCCCTTGATTATCTGGCATGGACTCGGCGATAATTACAAAAGCGGATGGTCT  
TGCGCAAGTTGGAAAAGTAGCTGAAGCTATTCATCCTGGGACTTTTGTCTACAATATTCATGTAGATGAGGATGCATCTGCAGATAGGACAGCT  
ACCTTCTTTGGAAAATCTCACTCGTGAGTACATCCCTATTTTTTCCCTTTAAATATCATACTAACTCTCTTACCAAGTTCAAATCGAAAAGGTCTG  
CGAAGACCTCGCCTCCCATCCTATTCTCTCTACCGCGCCCGCGTTCGACGCAATTGGATTCTCCCAAGGCGCCAATTCTTGCCTGGCTACATA  
TCCCCTGCAATGCTCCACCATCCGCTCTCTCTGACCTTCGGTTCCCAACACAACGGCATTCTGCCTTCCAAGCCTGTGGTCTGCCGATT  
TCCTCTGTGCGGGTGTCAAACCTTTTGCATCCAAACCTGGTCAACCTTTGTCCAATCTCGTCTCGTACCCGCTCAATACTTCAGAGATCC  
GGAAAACCTAGACTCTTACCTTGAATATTCCAATTTCCCTTGGCGACATCAATAATGAGCGCGTTCTCAAGAACCACAAATATAAATCCAACATG  
GAAAAATTGGAACGATTTCGTAATGTATGTCTTTGAAAGACGATACAACTGTATCCCTAAGGAAAGTGGATGGTGGGCTGAAGTCAACGGCACGG  
AAGTTACACCACTGAAAGAAAGAGCCATTTATAAAGAAGATTGGCTAGGTTTAAAGACATTGGATGAGGCCGAAAATTAGTTTTCGAAACCAT  
TCCAGGGGGACATATGACGTTAGGAGAGGAGATGCTAGAGAAGGCTTTCAAAGAGTATTTTGGTCCAGCAGGGAAGAAATTTGGG

>Bcin16g03460 (MLST7), partial sequence [organism=Botrytis cinerea, strain D11\_KL\_tax4]  
ATGAACCTCTTGATTTGAACTCTTCATTAATTGCAAGTGATGAACCCCTATTCTGCCAGAGGATAGTTACAAGACGTATATCATTAGTCGAGA  
ACCCTCATGATATATATTGACGGATTTTTGAAAAGCGAATGAAAAGTAAACATTTGGTTGATGTTAGGTGTGTTATTTATTCTGATGAAAAGAAC  
AAGAGAGACTGATGAGATAGTGAAGCGCTTTATGAACCGTCAACTGTTTCTCACGACAGGAAGTTACCATTGATCCTTCAGTTCGGAATTCCTG  
AAGTGGCGGTTTTAGAGAGGGATGAGGTGGTCAGGTGTATTGAGCATAGAGCGAGGGCATTTCAGGGGTGGAGGGGCGAGATGGGGATTGAGAA  
GTTGAGGACCGAGAGGTATGGGGTTGGAGGACATTATGGGATGCATTTGTAAGTTTTGGGGGATTGACGAAGGCTTTTGTCTATTTCTTACCA  
GTACGGATCTTGAAAGAAAGATAGCATGAACACGAGGGCTAATAACTAGGAAATAGCGATTGGAGCGGAGGTAAACGTGGCATAGACCGATTTA  
GTACTTTTCATGGTCTATGTGCGAGTATCCTCTGATATCGAAGGTGGAGGAACGGAATCCCACGTATCGTGGGACAAAAGGAGGAAGGTGGGA  
GGACTACCTGAAAACCTACGGAAGCATTGGATCCAAGAACTGGAGAAAATGTAACAGTAGAAGGGGTGACATTCAAACCAATCAAGGGAATGCC  
GTATTCTGGGAAAATACTGACAACAACGGGAGGGGCTATGAT

>Bcin12g03020 (MLST8), partial sequence [organism=Botrytis cinerea, strain D11\_KL\_tax4]  
CGATTGGCTGCGAAGAAAAGTGCAGCAGCCGAGTCAACAAAAGCACGAATAAACCATCGGCAAGGGAAAATATCTCTGAACCACAACATGACA  
CGAGCGCGGAAGAGTATATCGGGCGAGAAGCTTCATCAAGAGCACCAAAGCGACAACGAGTCGATGATAAATTATAACTCTTACGGTGGAAAGAAA  
TGAAAATACAGCAGCTTATGCTTCCGGGAAACTTCCATCTGGAAGTATAAATGTTGGTGGAGGTAGGAAGACCACCTTTTCAAGAAGAACCACGA  
ACGGCATTGTGCTGCGCAAGTTGCCCTTGGAAAGTATCAACATTTGGTGGAAAGAAAGGCTACCCAAATCGAGGACGAGGGTAGAGCAGCTTATG  
CTTCCGGAAAATGCTTCCAGGAAGTATAAACTCTGGCGCAAAGAGGCGATTTCAATCCAAAGTGAACCGAGACCGGCTTATGTCTCCGGAAAGC  
TTCCACATGGTAGTATCGACGGTATGCGAAAACCGTGAATGGCTGCCCTCCACCGCGAAAATTGCTGAGGGTGGGAGGAAACCAGGCCAGGTGT  
CTCTTCTCTATTACATTCATCTCAATCCTACTTCAAAGAAAACCTTTGATGAACCCGAAGAACAAGCGGAACCGGCAAAAACCATCCAATGCGCCTTTG  
ACAGAGGAAAATGGCGACTTTACCAATCTAGGGTTATCGAGAAGGCTTGCAGCCATCTATCGACTAACTCGATATGAAAGCTCCGACCGCCA  
TTCAAAAAGCATCTGTACAGCAGTTGGTATCGGACGATAGCGATGCTTTCATACAAGCAGAGACTGGATCTGGA AAAACTTTGGCATATCTACT  
ACCTATAGTCGAGCGAATATTAGCATTGAGTGAGAATGGCGTACAAA

>Bcin02g07770 (MLST9), partial sequence [organism=Botrytis cinerea, strain D11\_KL\_tax4]  
CAGCTTTCCCTTTTCGGTCTTGGCATCTACAGTCATTGCCATCCCTACACCATCACAACTTGAGTCTCGGGCCGTTATCGATTCCGATGCCGTTG  
TAGGATTTGCCGAAACTGTTCCAGTGGGACCGTAGGAACAGTTTATGAGGCATATAAACCATTCCTTAAAGTCGTAAATGGATGCGTACCATT  
CCCTGCCGTCGATGCATCGGGTAACACAGGGTATGTCTTATATCTTTCTCTTCCACACGATTGCTATTTAGTCTCTAACATATTTTAGTGGTG  
GTTTGTACCAACTGGCAGTAGCAATGGTGGTTGCGACGAGCAGTACCGGTCAAGTATATGTTTCGAGGAGGACAAAGCGGATCAAACCTACGCCAT  
CATGTACTCTGGTAAGTTCTCTCTAAACTTCTCCTTATAGATCCAACCTAACAAAATCTTAGGTACATGCCAAAGGACGAGCCCTCAACCGGT  
ATTGGTCAACGTCACGATTGGGAAGGTGTAATTTGTCTGGCTCTCCAGCGCCACCGCCACAACCTGCCGACAACATCTTAGCCGTTTGTCTTCCG  
CCCACGGAGGCTGGGATTGTTCCACGGATGGCTATTTCCCTTTCTGGTACCAGCCCTCTTATCAAGTACGAAAGTATCTGGCCCGTCGATCACTC  
AATGGGTCTTACTAGTACTGTTGGTGGAAAACAACCTATGATTGCTTGGGAGTCTTTACCAACTGCTGCTCAAACCTGCTCTTGAGAACACCGAT  
TTCGGTGTGCGAATGTTCCATTCAATTCGGCTGTTTTACAGACAATCT

>Bcin04g02090 (MLST10), partial sequence [organism=Botrytis cinerea, strain D11\_KL\_tax4]  
CGGAGGATGATATGGCAAGGTCTATGATTACCAAAGCATTGTAGGCATGAGTAGTAACTGTGCAATATGACTATGAATGATGTTTACAAGCC  
CTACATCCATGTAAGAAAATGTAGAATAGAGAGATCAGTAACTGGAATAATATCGTTTGTAGGCTTTCAAGTTACTTACGCAGTTCAACCCAAT  
CACTACAGCTATTGCCGAATCCCCTATTTCAAATGGCTGTCTCAGCAAATACCATCGAAAAGTACACACTGCTAGGCCCTTTCTTTCAGAATA  
TCTCCTCTGCAACAGGAAGTTACCAGGGAATACTTCAGTGCGCCAAAAGACGATAGATAGGCGACACATTGCCACATCTCAAGATGCCCTTACGAT  
TGACCTTACAAAACCATCAAAAAGATTTACTTGTATATCATCAACCACTTTGTTTCGAGCAAGTCCAATCGCCAAAAGCAAAAACCTTGGATTGGTT  
CGCTACATTGTGAATCAAAAATACAAGCGTCGAGCACTTCAGGTAGACCCGAAAGAGTGTCTTCTGATGGCTTTATGCACAATGTCACCTGTC  
GTTCTAGATGGTCTTTGTGAGCCATTTCATGGATACCACATTTCTCGAAAATTTGAAAGATTGATATTGATTATCTAAGACGTGCGCCTCGTGTAG  
ATATCAAGGACGAGACCAAGTTGAACGCTGACGAGAAGGCTTCTGAGAAGTATATGAGGACACTGTTCTGGCACCTTCTAATTTTCATCTCTGA  
GGTCTTCTTTCTCACATTTGGCTGCCCATCATTATGGTAGTGAAGCTCTTAATGCCACGCATAAAGAGTCTGGAGAAAGACATCAAATATATTTCA  
AAAGCAATTGACTGCCGTTGAAGCA

>Bcin01g07220 (MLST1), partial sequence [organism=Botrytis cinerea, strain D11\_M\_E01]  
ATGGCATATCTTGTCTTTTCGCATTATGCTTTGGAACGTGCTGGACAAGCTTGGGTTAGTGCTCTGCGTGTAGAAGCACTAAAGAAGATTCT  
CGCACAACCGAAGTCATGGTTTTGAGGAATCCAGGAATTCACCTAGCCGGTTGACGAAAGTTTTGGATAGGAACCTCTGAGGAAATGCGTAATCTC  
GTTGGCCGCTTTGCTGGTATTGTATTACACGATTTTTTATGCTATTGATATCAATCATTGGGCTTTCTGTAATACATGGAAACTGACATTAG  
TCTCGATGGCAACTGGCCAGTTATATACGCTGTCACCAAAACGTTCAATCGCGTGAGTGGAAAATGGGAAAACAAGTGAACCTACGCCCTCTGA  
AATGACCACTGGCATATTTTTAGAGACGTTCTCCAACATCAAAGTGGTTTCGGGCTTTACTCTGGAAACTTACTTTGAGACAAAACACACCAAAG  
CTACAGAAGAACTTTATAAAGTTGGACTAATACGAGCAAACCTACTCGGGATTGCTGTGGGGATTGACAGATGCGATGTCATTCTTCATCACTGC  
AACTATCTTTTATTATGCCACGGTTCTCATTACCAAGAGAGAGATCAGTATCGCGACTGCACTACAGACTGTCAATCTTCTATTATTTGGTATT  
TCTAATAGTACGAATATGCTGGCCATGATACCACAAATCAACTCTTCTCGCGTTACAGCTACGCATATGCTTGCATTAGCCAATCTCGATTTCAT  
CTTCTCCACGAAAAATAAAGGAACCGAACGGCTTTTCGACAATCTTTCCAATCAAATTC AACCGTCTTTCATTACATACCCCTACTCGTCTCTGA  
AAAACGAACGATATCATCCTTTTCTCTTTCCCTGATTCCCTAACTCAACAACTGCACCTGTGCGACCCCTCCGGCTCCGAAAAATCTACAATAGCT  
GCTCTGCTCATTGGTCTCTATCCGCCAGATACTTCAACACCTCCACCGTTGACATTCAATCGCGCCTCCATAAGTAACGTGCACATTCGGTCTC  
TCCGGGCTTCTCTCTCACTCGTTCACAAAATACCGATTCTATTTCCAGCTACCATTCTCCATAACATCATTTATGGTCTCCAGAATCTTCTCC  
TTGTGCTAGTCTTCCATCTGCTATTGCGTCAGCAAAAGATGCTGGGATCCATGAATTTATCACATCGCTTCCACAAGTTATGATACTATGG

>Bcin05g07690 (MLST2), partial sequence [organism=Botrytis cinerea, strain D11\_M\_E01]  
ACCCTATCACCAAGTCTTTTCTGCACTTTCCTCATCAAAAACGAACGAGAATCATCAATAAACTTTGCTGAAGTAATGGGTTTTATT  
TTGGCCAGGATGCCTTCTCTCTACGACAGCAAGCCTTCGATGATATGTTGTGGGTAGTTCTTGGCTGGCTGGATACTGTCAAATTCATTGATTT  
ACATTCTGAATTGCACTATTCAAACGACTCTCAGCCAGAATGGTACGGACAACAATATAAACCTGCATTTGCACATCGAGCGGACTATTTTGG  
GAATTGGCTTCAACAAGGATGGGATACTACTCTCTGTGGTGGTGGATGATATGGTCACCATACTTACTCCATAACAAGAACGCAATTACCAATG  
AACTCTATATCGCAGCTTCGATATCGATGTACCTATATTTCCCGGAGATGACAATCAATCCCCATTTATGCTTTCCAACCCCTCGTATCCACC  
TCACGATCCGAAATATCTACAGGCAGCTGTTGATGCTTACAAATGGCTGAATGGTTCCAACATGACGGATTTACAAGGATTATATGTCGACGGG  
TACCATATCTCGAATCTTTCTGGCGGTGAAAACACCCATTGCGATTCTAGAAATGAGATGGTATATACCTACAATCAAGGTGTTTTGCTTACTG  
GACAACGTGGTTTTGTATGACGCAACCGCCGACGATCATACCTTGTAGATGGCCACAAACTCATCGCGAATGTTATTAATGCCACAGGCTATGA  
CCTGAAACACAATGTTGTCATCTCACCGCCACCCAAAAGATGGTTCCGCATTTGGCAAAGTGGTTTGGCCTGGGTAGGAATGGAATACTGGAAGAA  
GGATGCGATTCAAGTGCTTCGTGTTCTCAAAAATGGACAAAATTTCAAAGGCATATTTCTTTCATCACTTGATTGCGTTCGTAGTGATTGCCAG  
GGGAGCCTATTGCAAGGACGAAGGAAAGCTTAGAACTCGACAGAGTGTGGCATTCTGACAAAATGCTCACAGTATACAAAAT

>Bcin06g01710 (MLST3), partial sequence [organism=Botrytis cinerea, strain D11\_M\_E01]  
GTGAGTCTGACTTTTGTATTTGAGCGTTAAGATAGACACTGATATACCAAGGCAATCACCTAATTTTCATGGCGTCTTCCCTGCATCATCTACC  
TACCCTGGAATGCTGGGAGAATTATACTCAGCAGCTTTACAGCACCTGCTTTCAATTTGGATCTGTTCCCTGCTGTGACAGAATTTGGAGACGG  
TTGTAATGGATTGGCTGGCCAAGCTTCTCAATCTCCAGACTGTTATTTGCTTTCGACTCATGGTGGTGGTGTCTCCAAGGATCAGCCTCGGA  
AGCTATCGTTACCGTTATGGTTGCTGCCCGGATAAAATATCTTCGTGAACTACTGAAGTCTGTGCGGCATTGAGCTCGAGGATGCGATTGCA  
TATAAGAGGAGTAAGCTAGTTGCACTAGGAAGCGAAATGGCACACAGCTCCACGCAGAAAGCAGCGCAAATAGCTGGCGTTAGATTCCGATCGA  
TTCCAGTACTCGCATCCAATGATTTTCGCCATGACGGGTGATGATTTAGAGAAGGTGTTGAAAGAATGCAAATCTCAAGGATTGGAACCCCTCTA  
TCTAACTTCGACTTTGGGAACAACATCTACATGCGCAGTTGACGACTTCGCATCTATTGCAACAGTACTTTCAAATATGCACCTCCAGATGTT  
GCAGGCGAGATCTGGGTTACGTCGATGCTGCTTATGCAGGTGCAGCTTTGGTTTTGCCCTGAATACCATCATCTAACATCGTCTTCCAGCATT  
TCCATTCCTTCGATATGAACATGCACAAATGGCTTCTGACAAAATTTGACGCTTCTTGTCTATATGTCAGAAACGCAAAGATCTGATCGATGC  
ACTCTCCATAACACCAAGTTATCTTCGCAACGAGTTTTTCAGAGAGTGGACTCGTAACCGACTATCGGGACTGGCAAATTCCTCTCGGAAGACGC  
TTCCGAAGCTTAAAGATTTGGTTTTGTCTCAGAACCCTAC

>Bcin09g03030 (MLST4), partial sequence [organism=Botrytis cinerea, strain D11\_M\_E01]  
ACCCTTCAACCCACCGCAGCTCCTATACCAAAAGCGAGTATCCTACCAATTCCTCTCCACCTGCGACTTTAAGACCATTGGCTTTCCGCACT  
TTCACAAAAAAGCATAGTTTAAACATTGACGTCGTGGCATTACAAGTGTGGCTACTTTTATTGGAAAGCATTTGTGGACAGGATGGAGGGAAG  
AAGGACTGGCAGAGAGAGTCTTTGGAGGAGGTGCGCAAGAGTTGGAAGAATAGGAGTGGCGGTGTCATTGTGCGAGGGCAGGGAACGGAATGAA  
GGAGATTCTGAAAGCTTTGGAAGGGAATATGAGTGGTGGAAAGGATAGTTCATAGGAAGAGAGCTAAGCCGGCAGAATAGTTTAGTACTGGGATCA  
TCACAATATGGAGAGGTCAATCATAACAAGACTTTGGGCTACGGCCAGGGAATATACCCAGAGAGGATAGTCAAGTCTTGGGAATGTCAACGT  
TGGAGGTCAATGACGAGGAAGATGAGGATGGCTGATGGATCCAAGAAGTGGTTAAAAGTCATTGATGCATTTGAGCAACCTCGACTGGTGTGTA  
CAATGTTGCTAAAAAGCACTTTGATAGGTATGTTTCAATGATAAAAATTTTATCTGAATCGACTAACTCAGTACAGAGATACCTCCAAACCTTCA  
TTGTTCCACCTGCGTCTCATAAAAACCTCCTCTTCCAAAACCGCTATAATGTTATCCATCAACGCTCTCTTTCGCAATGAATCTTTTCAAACGC  
CCGCTTTTCAAAGGTGGCAAATCTTCCCTTCAACGCAGCACGTCGGCCATTACCACCAACAACAATCATACAAATTAACGCCGATAGCTAATCT  
TCTCGGTGCAATCGCAGCTCTCATATGCTTCTCGGTCTCCTCAGTATTTACCCACTGGTACCCTCGCCATCAATGACCTGACGGGCAGTATC  
GCTCTCGATCTTACACACGCAGCAGCCATTC

>Bcin11g01310 (MLST5), partial sequence [organism=Botrytis cinerea, strain D11\_M\_E01]  
ACTGACATGGACCTCATGTGGAACCGCGTAGAATGCGCAACGCTTGAAGTTCCGCTCGAATATGGCGATGCAACGTCAACGGCAAAGCCAGT

```
GTTGCGCTTGCTCGTTATCCTGCCACTGTTGCCGCGAGCAAGAAGCTCGGGTCTCTCTTGATAAACCCCGGTGGACCCGGTGCCTCTGGTGTG  
GCTTTGTGCAGTCTGGAGCCGGTGCCGCCGTCTCGACACTGAGTGGTGGGTTGTACGATATCATCGGATGGGATCCACGTGGAACCCGGTGCCTC  
GGCTCCTATTTTGGAAATGTTTTGCAAATGCCAGTGGGAGTATGATTTTAAACAACCGGTTTCCATCTGCTCCGAATCTCTGGCTCGGACAATTT  
GCGAATGCCAGCGCAAATTTCTGCTGTTAGCTCTGCTATCACATCCTTTGACACTTCTGTGCGTGTCTTTGCAAAAGCTTGCCTGGCTCAGAAAT  
CTCCCGCTCTTTACACCTCAACAGCAGCATATGTTGCTCGAGACATGGCAGCGATAGTTCGATGCATTTGGATGGGACCTCTGCAAAACTTAAC  
CTGGGGTTTCTCATATGGAACATTTTCTAGCTGAGTTTATCCAACTTTCCAGCCGCGTGGGAAGAGTTCTTGCCGATGGTGTTCGAC  
GCAAAGGCAAATGCACTCACATACGTTAGCCAACTTCCCAACGATCAACTCAGTGTTCGTGCTTCGTTGAACGATTTTGCAGCTTTCTGCACCA  
CCGCCGGTAGTAAAGGTTGCTCTTTTGCACCCGCCCTACTGGAACCACAGTACTGTTGCTACCAGACTGGACAACATAATGAAGGATATGTT  
CCTCAATCCTATTGTTGCTTCGGGCTTAAGCATCAG
```

```
>Bcin15g03910 (MLST6), partial sequence [organism=Botrytis cinerea, strain D11_M_E01]  
GCCAAAACACAAAATCATCCAACGATGAAGATGATACTCCACTTCCCTTGATTATCTGGCATGGACTCGGCGATAATTACAAAGCGGATGGTCT  
TGCGCAAGTTGGAACACTAGCTGAAGCTATTCATCTGGGACTTTTGTCTACAATATTCATGTAGATGAGGATGCATCTGCAGATAGGACAGCT  
ACCTTCTTTGGAAATCTCACTCGTGAGTACATCCCTATTTTCTTTAAATATCATACTAACTCTCTTACCAAGTTCAAATCGAAAAGGTCTG  
CGAAGACCTCGCCTCCCATCCTATTCTCTCTACCAGCCGCCGCTCGACGCAATTGGATTCTCCCAAGGCGGCCAATTCTTGCCTGGCTACATA  
TCCCCTGCAATGCTCCACCCATCCGCTCTCTCTGACCTTCGGTTCCCAACACAACGGCATTCTGCTTCCAAGCCTGTGGTCCGCGATT  
TCCTCTGTGCGGGTGTCAAACCTTTTGCAGTCCAACACCTGGTCAACCTTTGTCCAATCTCGTCTCGTACCCGCTCAATACTTCAGAGATCC  
GGAAAACCTAGACTCTTACCTTGAATATTTCAATTTCTTGGCGACATCAATAATGAGCGGCTTCTCAAGAACCACAAATATAAATCCAACATG  
GAAAAATTGGAACGATTTCGTAATGTATGCTTTGAAAGACGATACAACCTGTCATCCCTAAGGAAAGTGGATGGTGGGCTGAAGTCAACGGCACGG  
AAGTTACACCACTGAAAGAAAGAGCCATTTATAAAGAAGATTGGCTAGGTTTAAAGACATTGGATGAGGCCGAAAATTAGTTTTTCGAAACCAT  
TCCAGGGGGACATATGACGTTAGGAGAGGAGATGCTAGAGAAGGCTTTCAAAGAGTATTTTGGTCCAGCAGGGAAGAAATTTGGG
```

```
>Bcin16g03460 (MLST7), partial sequence [organism=Botrytis cinerea, strain D11_M_E01]  
ATGAACCTCTTGATTTGAACTCTTCATTAATTGCAAGTGATGAACCCCTATTCTGCCAGAGGATAGTTACAAGACGTATATCATTAGTCGAGA  
ACCACCTCATGATATATATTGACGGATTTTGTAAAAGCGAATGAAAAGTAAACATTTGGTTGATGTTAGGTGTGTTATTTATTTCTGATGAAATGAAC  
AAGAGAGACTGATGAGATAGTGAGCCGCTTTATGAACCGTCAACTGTTTCTCACGGACAGGAAGTTACCATTGATCCTTCAGTTCGGAATTTCTG  
AAGTGGCGGTTTTAGAGAGGGATGAGGTGGTCAGGTGTATTGAGCATAGAGCGAGGGCATTTCAGGGTGGAGGGGCGAGATGGGGATTGAGAA  
GTTGAGGACGAGAGGTATGGGGTTGGAGGACATTATGGGATGCATTTGTAAGTTTTGGGGATTGACGAAGGCTTTTGTCTATTTTCTACCAG  
TACGGATCTTGAAGAAAAGATAGCATGAACACGAGGGCTAATAACTAGGAAAATAGCGATTGGAGCGGAGGTAACGTTGGCATAGACCGATTTAG  
TACTTTTCATGGTCTATGTGACGATATCCTCTGATATCGAAGGTGGAGGAACGGAATTTCCACGTATCGTGGGACCAAAAGGAGGAAGGTGGGAG  
GACTTCTTGAAACTACGGAAGCATTGGATCCAAGAACTGGAGAAAATGTAACAGTAGAAGGGGTGACATTCAAACCAATCAAGGAAATGCCG  
TATTCTGGGAAAATACTGACAACAACGGGAGGGGCTATGAT
```

```
>Bcin12g03020 (MLST8), partial sequence [organism=Botrytis cinerea, strain D11_M_E01]  
CGATTGGCTGCGAAGAAAACCTGCGCAGCACCAGTCAACAAAAGCACGAATAAACCATCGGCAAGGAAAATATTCTCTGAACCACAACATGACA  
CGAGCGCGAAGAGTATATCGGGCGAGAAGCTTCATCAAGAGCACCAAAGCGACAACGAGTCGATGATAAATTATAACTCTTACGGTGGAAAGAAA  
TGAAAATACAGCAGCTTATGCTTCCGGGAAAACCTCCATCTGGAAGTATAAATGTTGGTGGAGGTAGGAAGACCCTTTTCAAGAAGAACCACGA  
ACGGCATTGTGCTGCAAGTTGCCCTTGAAGTATCAACATTTGGTGGAAAGAAGGCTACCCAAATCGAGGACGAGGGTAGAGCAGCTTATG  
CTTCCGAAAATTTGCTCCAGGAAGTATAAATCTGGCGCAAAGAAGGCGATTTCAATCCAAGATGAAACGAGACCCGGCTTATGTCTCCGAAA  
GCTTCCACATGGTAGTATCGACGGTATGCGAAAACCTGAAATGGCTGCCGTCCACCCGCGAAAATGCTGAGGGTGGGAGGAAACCAGGCCAGGTT  
GTCTCTTCTCTATTTCACATTCATCCTACTTCAAAGAAAACCTTTTGGATGAACCCGAAGAACAAGCGGAACCCGGCAAACCATCCAATGCGCCTT  
TGACAGAGGAAAATGGCGACTTTACCAATCTAGGGTTATCGAGAAGGCTTGCAGCCATCTATCGACTAAACTCGATATGAAAGCTCCGACCCG  
CATTCAAAAAGCATCTGTACAGCAGTTGGTATCGGACGATAGCGATGCTTTCATACAAGCAGAGACTGGATCTGGAAAACCTTTGGCATATCTA  
CTACCTATAGTCGAGCGAATATTAGCATTGAGTGAGAAATGGCGTACAAAT
```

```
>Bcin02g07770 (MLST9), partial sequence [organism=Botrytis cinerea, strain D11_M_E01]  
CAGCTTTCCCTTTCCGGTCTTGGCATCTACAGTCAATGCCATCCCTACACCATCACAACTTGAGTCTCGGGCCGTTATCGATTCCGATGCCGTTG  
TAGGATTTGCCGAAAACCTGTTCCAGTGGGACCGTAGGAACAGTTTATGAGGCATATAAACCATTCCTTAAAGTCGTAAATGGATGCGTACCATT  
CCCTGCCGTCGATGCATCGGGTAACACAGGGTATGTCTTATATCTTTCTCTTCCACACGATTGCTATTGAGTCTCTAACATATTTTAGTGGTG  
GTTTGTCAACAACTGGCAGTAGCAATGGTGGTTGCAGCAGCAGTACCGGTCAAGTATATGTTTCGAGGAGGACAAAGCGGATCAAACCTACGCCAT  
CATGTACTCCTGGTAAAGTTCTCTCTAAAACCTTCTCCTTATAGATCCAACCTAACAAAATCTTAGGTACATGCCAAAGGACGAGCCCTCAACCGGT  
ATTGGTCAACCGTACGATTGGGAAGGTGTAATTTGCTGGCTCTCCAGCGCCACCGCCACAACCTGCCGACAACATCTTAGCCGTTTGTCTTCCG  
CCCACGGAGGCTGGGATTGTTCCACGGATGGCTATTCCCTTTCTGGTACCAGCCCTTATCAAGTACGAAAGTATCTGGCCCGTCGATCACTC  
AATGGGTCTTACTAGTACTGTTGGTGGAAAACAACCTATGATTGCTTGGGAGTCTTTACCAACTGCTGCTCAAACCTGCTCTTGAGAACACCGAT  
TTCGGTGTGCGAATGTTCCATTCAATCCGGCTGTTTTCACAGACAATCT
```

```
>Bcin04g02090 (MLST10), partial sequence [organism=Botrytis cinerea, strain D11_M_E01]
```

```
GCGGAGGATGATATGGCAAAGTCTATGATTACCAAAGCATTTGTAGGCATGAGTAGTAAACTGTGCAATATGACTATGAATGATGTTTACAAGC
CCTACATCCATGTAAGAAATGTAGAATAGAGAGATCAGTAACTGGAACATAATATCGTTTGTAGGCTTTCAAGTTACTTACGCAGTTCAACCCAA
TCACTACAGCTATTGCCGAATCCCCACTGTTTCAAATGGCCGTCTCAGCAAATACCATCGAAAAGTACACACTGCTAGGCCCTTTCTTTCAGAAT
ATCTCCTCTGCAACAGGAAGTTACCAGGGAATACTTCAGTGCGCCAAAAGACGATAGATAGGCCGACACATTGCCACATCTCAAGATGCGTTACGA
TTGACCTTACAAAACCCATCAAAAAGATTTACTTGTATATCATCAACCCTTTGTTTCGAGCAAGTCCAATCGCAAAAAGCAAACCCCTGGATTGGT
TCGCCTACATTGTGAATCAAAAATCACAAGCGTCGAGCACTTCAGGTAGACCCGAAAAGAAGTGTCTTCTGATGGCTTTATGCACAATGTCACCTGT
CGTTCTAGATGGTCTTTGTGAGCCATTCATGGATAACCACATTTCTCGAAAATTTTCGAAGATTGATATTGATTATCTAAGACGTGCGCCTCGTGTA
GATATCAAGGACGAGACCAAGTTGAACGCTGACGAGAAGGCTTCTGAGAAGTATTTATGAGGACACTGTTCTTGGCCTTCTAATTTTCATCTCTG
AGGTCTTCTTCTCACATTGGCTGCTCATCATTTATGGTAGTGAAGCTCTTAATGCCACGCATAAGAGTCTGGAGAAAGACATCAAATATATTCA
AAAGCAATTGACTGCCGTTGAAGCAG
```

>Bcin01g07220 (MLST1), partial sequence [organism=Botrytis cinerea, strain D11\_M\_E07]

```
ATGGCATATCTTGTCTTTTTCGCATTATGCTTTGGAACGTGCTGGACAAGCTTGGGTAGTGTCTGCGTGTAGAAGCACTAAAGAAGATTCT
CGCACAACCGAAGTCATGGTTTGGAGAAATCCAGGAATTCACCTAGCCGGTTGAACGAAGTTTTGGATAGGAACCTCGAGGAAATGCGTAATCTC
GTTGGCCGCTTTGCTGGTATTGTATTACACGATTTTTTATGCTATTGATATCAATCATTTGGGCTTTCTGTAATACATGGAACCTGACATTAG
TCTCGATGGCAACTGGCCAGTTATATACGCTGTCACCAAAACGTTCAATCGCGTGAGTGGAAAATGGGAAAACAAGTGCAACTACGCCCTCTGA
AATGACCACTGGCATATTTTCAGAGACGTTCTCAACATCAAAGTGGTTTCGGCTTTTACTCTGGAACTTACTTTGAGACAAAACACACCCAAA
GCTACAGAAGAACTTTATAAAGTTGGACTAATACGAGCAAACTACTCGGGATTGCTGTGGGGATTGACAGATGCGATGTCATTTCTCATCCTG
CAACTATCTTTTATTATGCCACGGTCTCATTTACCAAGAGAGAGATCAGTATCGCGACTGCACTACAGACTGTCAATCTTCTATTATTTGGTAT
TTCTAATAGTACGAATATGCTGGCCATGATACCACAAAATCAACTCTTCTCGGTTACAGTACGCATATGCTTGCATTAGCCAATCTCGATTCA
TCTTCTCCACGAAAATAAAGGAACCGAACGGCTTTTCGACAATCTTTCCAATCAAATTCACCGTCTTTTATTACATACCCCTACTCGTCCGTG
AAAAACGAACGATATCATCTTTTCTCTTTCCCTGATTCTTAACCAACTGCACTTGTCCGACCCCTCCGGCTCCGAAAATCTACAATAGC
TGCTCTGCTCATTGGTCTCTATCCGCCAGATACTTCAACACCTCCACCGTTGACATTCATCGCGTCTCCATAAGTAACTGTCACATTCCGTCT
CTCCGGGCTTCTCTCTCACTCGTTCCACAAAATACCGATTCTATTTCCAGCTACCATTCTCCATAACATCATTTATGGTCTCCAGAATCTTCTC
CTTGTGCTAGTCTTCCATCTGCTATTCATCAGCAAAAAGATGCTGGGATCCATGAATTTATCACATCGCTTCCACAAGGTTATGATACTAT
```

>Bcin05g07690 (MLST2), partial sequence [organism=Botrytis cinerea, strain D11\_M\_E07]

```
ACCCTATCACCAAGTCTTTTCTGCACTTTCTCATCAAAAACGAACGAGAACATCATCAATAAATACTTTGCTGAAGTAATGGGTTTTATT
TTGGCCAGGATGCCTTCTCTCTACGACAGCAAGCCTTCGATGATATGTTGTGGGTAGTTCTTGGCTGGCTGGATACTGTCAAATTCATTGATTT
ACATTCTGAATTGCACTATTCAAACGACTCTCAGCCAGAATGGTACGGACAACAATATAAACCTGCATTTGCACATCGAGCGGACTATTTTGG
GAATTGGCTTCAACAAGGATGGGATACTACTCTCTGTGGTGGTGGGATGATATGGTACCATACCTTACTCCATAACAAGAACGCAATTACCAATG
AACTCTATATCGCAGCTTCGATATCGATGTACCTATATTTCCCGGAGATGACAATCAATCCCATTTATGCTTTCCAACCCCTTCGTATCCACC
TCACGATCCGAAAATATCTACAGGCAGCTGTTGATGCTTACAAATGGCTGAATGGTTCCAACATGACGGATTTGCAAGGATTATATGTCGACGGG
TACCATATCTCGAATCTTTCTGGCCGTGAAAACACCCATTCGATTTCTAGAAATGAGATGGTATATACCTACAATCAAGGTGTTTTGCTTACTG
GACAACGTGGTTTGTATGACGCAACCGCCGACGATCATACCTTGTAGATGGCCACAAACTCATCGCAATGTTATTAATGCCACAGGCTATGA
CCTGAAACACAATGTTGTCTATCTACCGCCACCCAAAAGATGGTTCCGCATTGGCAAAGTGGTTTTGGCTGGGTAGGAATGGAATACTGGAAGAA
GGATGCGATTCAAGTGCTTTCGTGTTCTCAAAAATGGACAAAATTTCAAAGGCATATTTCTTTTCATCACTTGATTGCGTCTGTAGTGATTTGCCAG
GGGAGCCTATTGCAGGGACGAAGGAAAGCTTAGAACTCGACAGAGTGTGGCATTCTGACAAAATGCTCACAGTATACAAAAT
```

>Bcin06g01710 (MLST3), partial sequence [organism=Botrytis cinerea, strain D11\_M\_E07]

```
GTGAGTCTGACTTTTTGTATTTGAGCGTTAAGATAGACACTGATATACCAAGGCAATCACCTAATTTTCATGGCGTCTTCCCTGCATCATCTACC
TACCCTGGAATGCTGGGAGAATTATACTCAGCAGCTTTTACAGCACCTGCTTTCAATTGGATCTGTTCCCTGCTGTGACAGAATTGGAGACGG
TTGTAATGGATTGGCTGGCCAAGCTTCTCAATCTCCAGACTGTTATTTGTCTTCGACTCATGGTGGTGGTGTATCCAAGGATCAGCCTCGGA
AGCTATCGTTACCGTTATGGTTGCTGCCCGGATAAAATATCTTCGTGAAACTACTGAAGGTCTGTCCGGCATTTGAGCTCGAGGATGCGATTGCA
TATAAGAGGAGTAAGCTAGTTGCACTAGGAAGCGAAATGGCACACAGCTCCACGCAGAAAGCAGCGCAAATAGCTGGCGTTAGATTCCGATCGA
TTCCAGTACTCGCATCCGATGATTTCCGCATGACGGGTGATGATTTAGAGAAGGTAATTGAAAGAATGCAAATCTCAAGGATTGGAACCCCTCTA
TCTAACTTCGACTTTGGGAACAACATCTACATGCGCAGTTGACGACTTCGCATCTATTTGCAACAGTACTTTCAAATATGCACCTCCAGATGTT
GCAGGCGAGATCTGGGTTACGTCGATGCTGCTTATGCAGGTGCAGCTTTGGTTTGCCCTGAATACCATCATCTAACATCGTCTTCCAGCATT
TCCATTCTTCGATATGAACATGCACAAAATGGCTTCTGACAAAATTTTCGACGCTTCTTGTCTATATGTCAAGAAACGCAAAGATCTGATCGATGC
ACTCTCCATAACACCAAGTTATCTTCGCAACGAGTTTTTCAGAGAGTGGACTCGTAACCGACTATCGGGACTGGCAAATTTCTCTCGGAAGACGC
TTCCGAAGCTTAAAGATTTGGTTTTGTCTCAGAACCCTAC
```

>Bcin09g03030 (MLST4), partial sequence [organism=Botrytis cinerea, strain D11\_M\_E07]

```
ACCCTTCAACCCACCGCAGCTCTATACCGAAAAGCGAGTATCTTACCAATTTCTCTTCCACCTGCGACTTTAAGACCATTGGCTTTCCGCACT
TTCACAAAAAAGCATAGTTTAAACATTGACGTCGTCGGCATTACAAGTGTGGCTACTTTTATTTGAAAAGCATTTGTGGGACAGGATGGAGGGAAG
AAGGACTGGCAGAGAGAGTCTTGGAGGAGTCCCAAGAGTTGGAAGAATAGGAGTGGCGGTGTCAATTTGTCGAGGGCGAGGGAACGGAATTGAA
GGAGATTCTGAAAGCTTTGGAAGGGAATATGAGTGGTGAAGGATAGTCAAGGAAGAGAGCTAAGCCGGCAGAATAGTTTAGTACTGGGATCA
```



TCACAATATGGAGAGGTCATATACATAACAGACTTGGGCTACGGCCAGGGAATATACCCAGAGAGGATAGTCAAGTTTGGGAATGTCAACGT  
TGGAGGTCAATGACGAGGAAGATGAGGATGGCCTGATGGATCCAAGAAGGTGGTTAAAAGTCATTGATGCATTTGAGCAACCTCGACTGGTGT  
CAATGTTGCTAAAAAGCACTTTGATAGGTATGTTTCAATGATAAAAATTTTATCTGAATCGACTAACCTCAGTACAGAGATACTCCAAACCTTCA  
TTGTTCCCACCTGCGTCTCATAAAACACTCCTCTTCCAAAACCGCTATAATGTTATCCATCAACGTCTCCTTCGCAATGAATCTTTTCAAACGC  
CCGCTTTTCAAGGTGGCAAATCTTCCCTTCAACGCAGCAGCTCCGCCATTACCACCAACAACAATCATACAAATTAACGCCGATAGCTAATCT  
TCTCGGTGCAATCGCAGCTCTCATATGCTTCTCGGTCTCCTCAGTATTTACCCTGTTACCCTCGCCATCAATGACCTGACGGGCAGTATC  
GCTCTCGATCTTACACACGCAGCAGCCATTC

>Bcin11g01310 (MLST5), partial sequence [organism=Botrytis cinerea, strain D11\_M\_E07]  
ACTGACATGGACCTCATGTGGAACCGGCTAGAAATGCGCAACGCTTGAAGTTCCGCTCGAATATGGCGATGCAACGTCAACGGCAAAGCCAGT  
GTTGCGCTTGCTCGTTATCTGCCACTGTTGCCGCGAGCAAGAAGCTCGGGTCTCTCTTGATAAAACCCCGGTGGACCCGGTGCCTCTGGTGTG  
GCTTTGTGCACTCTGGAGCCGGTGCCCGCTCTCGACACTGAGTGGTGGATTGTACGATATCATCGGATGGGATCCACGTGGAACCGGTGCTTC  
GGCTCCTATTTTGAATGTTTTGCAAATGCCAGTGGGAGTATGATTTTAAACAACGCTTTCCATCTGCCCCGAATCTCTGGCTCGGACAATTT  
GCGAATGCCAGCGCAAATTTGCTGTTAGCTCTGCTATCACATCCTTTGACACTTCTGTGCTGCTCTTGCAAAAGCTTGGCTGGCTCAGAAAT  
CTCCCGCTCTTTACACCTCAACAGCAGCATATGTTGCTCGAGACATGGCAGCGATAGTCGATGCATGGATGGGACCTCTGCAAACTTAACTA  
CTGGGGTTTCTCATATGGAATATTTTCCCTAGCTGAGTTTATCCAACTTTCCAGGCCGTGTGGGAAGAGTTCTTGCCGATGGTGTTCGCAC  
GCAAAGGCAAATGCACTCACATACGTTAGCCAATTTCCCAACGATCAACTCAGTGTTCGTGCTTCGTTGAACGATTTTGCAGCTTTCTGCACCA  
CCGCCGGTAGTAAAGGTTGCTCTTTTGCACCCGCCCTACTGGAACCTCAGGTAAGTGTGCTACCAGACTGGACAACATAATGAAGGATATGTT  
CCTCAATCCTATTGTTGCTTCGGGCTTAAGCATCA

>Bcin15g03910 (MLST6), partial sequence [organism=Botrytis cinerea, strain D11\_M\_E07]  
GCCAAAACACAAAATCATCCAACGATGAAGATGATACTCCACTTCCCTTGATTATCTGGCATGGACTCGGCGATAAATTACAAAGCGGATGGTCT  
TGCGCAAGTTGGAAAAGTACTGAAAGCTATTCATCTGGGACTTTTGTCTACAATATTCATGTAGATGAGGATGCATCTGCAGATAGGACAGCT  
ACCTTCTTTGAAAATCTCACTCGTGAGTACATCCCTATTTTCCCTTAAATATCATACTAACTCTCTTACCAAGTTCAAATCGAAAAGGCTCG  
CGAAGACCTCGCCTCCCATCCTATTTCTCTTACCAGCCCGCCGCTCGACGCAATGGATTCTCCAAGGCCGCAATTTCTTGGCTGGTTACATA  
TCCCCTGCAATGCTCCACCCATCCGCTCTCTCTGACCTTCGGTTCCCAACACAACGGCATTTCTGCCTTCCAAGCCTGTGGTCTGCCGATT  
TCCTCTGTGCGGGTCTCAAACCTTTTGGCATCCAACACCTGGTCAACCTTTGTCCAATCTCGTCTCGTACCCTCAATACTTCCAGAGATCC  
GGAAAACCTAGACTCTTACCTTGAATATTTCAATTTCTTGGCGACATCAATAATGAGCGGTTCTCAAGAACCACAAACATAATAATCCAACATG  
GAAAAATTTGGAACGATTCGTAATGTATGCTTTGAAAGACGACACAACCTGTCAATCCCTAAGGAAAGTGGATGGTGGGCTGAAGTCAACGGCACGG  
AAGTTACACCACTGAAAGAAAGAGCCATTTATAAAAGAAAGATTGGCTAGGTTTAAAGACATTTGGATGAGGCCGAAAATTAGTTTTCGAAACCAT  
TCCAGGGGGACATATGACGTTAGGAGAGGAGATGCTAGAGAAGGCTTTCAAAGAGTATTTTGGTCCAGCAGGGAAGAAATTTGGGG

>Bcin16g03460 (MLST7), partial sequence [organism=Botrytis cinerea, strain D11\_M\_E07]  
ATGAACCTCTTGATTTGAACTCTTCAATTAATGCAAGTGTGAACCCCTATTTCTGCCAGAGGATAGTTACAAGACGTATATCATTAGTCGAGA  
ACCCTCATGATATATATTGACGGATTTTGAAGCGAATGAAAGTAAACATTTGGTTGATGTTAGGTGTGTTATTTATTTCTGATGAAATGAAC  
AAGAGAGACTGATGAGATAGTGAGCCGCTTTATGAACCGTCAACTGTTTCTCACGGACAGGAAGTTACCATTGATCCTTCAGTTCCGAATTTCTG  
AAGTGGCGGTTTTAGAGAGGGATGAGGTGGTCAAGGTGATTTGAGCATAGAGCGAGGGCATTTTCAAGGGTGGAGGGGCGAGATGGGGATTGAGAA  
GTTGAGGACGCAGAGGTATGGGGTTGGAGGACATTTATGGGATGCATTTGTAAGTTTTGGGGGATTGACGAAGGCTTCTGTCTATTTTCTATCAG  
CACGGATCTTGAAGAAAGATAGCATGAACACGCGGGCTAATAACTAGGAAAATAGCGATTGGAGCGGAGGTAACCGTGGCATAGACCGATTTAG  
TACTTTTCAATGGTCTATGTGACGATATCCTCTGATATCGAAGGTGGAGGAACGGAAATTTCCACGATATCGTGGGACCAAAAGGAGGAAGGTGGGAG  
GACTTCTGAAAACCTACGGAAGCATTGGATCCAAGAAGCTGGAGAAAATGTAACAGTAGAAGGGGTGACATTTCAAACCAATCAAGGGAAATGCCG  
TATTCTGGGAAAATACTGACAACAACGGGAGGGGCTATGAT

>Bcin12g03020 (MLST8), partial sequence [organism=Botrytis cinerea, strain D11\_M\_E07]  
ATCGATTGGCTGCGAAGAAAAGTGCAGCACCAGTACCCAAAAGCACGAATAAACCATCGGCAAGGAAATATTTCTGAAACCACAACATGA  
CACGAGCGCGAAGAGTATATCGGGCGAGAAGCTTCATCAAGAGCACCAAAGCGACAACGAGTCGATGATAAATTATAACTCTTACGGTGGAAAGA  
AATGAAAATACAGCAGCTTATGCTTCCGGGAAAATTTCCATCTGGAAGTATAAATGTTGGCGGAGGTAGGAAGACCCTTTTCAAGAAGAACCAC  
GAACGGCATTGTCGCTGGCAAGTTGCCCCCTGGAAGTATCAACATTTGGTGGAAAGAAGGCTACCCAAATCGAGGACGAGGGTAGAGCAGCTTA  
TGCTTCCGGAAAATTTGCCCTCCAGGAAGTATAAACTCTGGCGCAAAGAAGGCGATTTCAATCCAAGATGAAACGAGACCAGGCTTATGTCTCCGGA  
AAGCTTCCACATGGTAGTATCGACGGTATGCGAAAACCTGAAATGGCTGCCGTCCACCGCGAAAATTTGCTGAGGGTGGGAGGAAACCAGGCCAGG  
TTGTCTCTTCTCTATTTACATTTCAATCTACTTCAAAGAAAATTTTATGATGAACCCGAAAGCAAGCGGAACCGGCAAACCATCCAATGCGCC  
TTTGACAGAGGAAAATGGCGACTTTTACCAATCTAGGGTTATCGAGAAGGCTTGACGCCATCTATCGACTAAACTCGATATGAAAGCTCCGACC  
GCCATTCAAAAGCATCTGTACAGCAGTTGGTATCGGACGATAGCGATGCTTTCATACAAGCAGAGACTGGATCTGGAAAACCTTTGGCATATC  
TACTACCTATAGTCGAGCGAATATTAGCATTTGAGTGAGAATGGCGTACAAAT

>Bcin02g07770 (MLST9), partial sequence [organism=Botrytis cinerea, strain D11\_M\_E07]  
ACAGCTTTCCCTTTCCGGTCTTGGCATCTACAGTCATTGCCATCCCTACACCATCAAACTTGGAGTCTCGGGCCGTTATCGATTCCGATGCCGTT

GTAGGATTTGCCGAAACTGTTCCAGTGGGACCGTAGGAACAGTTTATGAGGCATATAAACCATTCCTTAAAGTCGTAAATGGATGCGTACCAT  
TCCCTGCCGTCGATGCATCGGGTAACACAGGGTATGTCTTATATCTTTCTCTTCCACACGATTGCTATTGAGTCTCTAACATATTTTAGTGGT  
GGTTTGTACCAACTGGCAGTAGCAATGGTGGTTGCAGCAGCAGTACCGGTCAAGTATATGTTTCGAGGAGGACAAAGCGGATCAAACCTACGCCA  
TCATGTACTCCTGGTAAGTTCTCTCTAAACTTCTCCTTATAGATCCAACCTAACAAAACTTAGGTACATGCCAAAGGACGAGCCCTCAACCGG  
TATTGGTCACCGTCACGATTGGGAAGGTGTAATTGTCTGGCTCTCCAGCGCCACCGCCACAACCTGCCGACAACATCTTAGCCGTTTGTCTTCC  
GCCACGGAGGCTGGGATTGTTCCACGGATGGCTATTCCCTTTCTGGTACCAGCCCTCTTATCAAGTACGAAAGTACCTGGCCCGTCGATCACT  
CAATGGGTCTTACTAGTACTGTTGGTGGAAAAACAACCTATGATTGCTTGGGAGTCTTTACCAACTGCTGCTCAAACCTGCTCTTGAGAACCACCGA  
TTTCGGTGCTGCGAATGTTCCATTTCATTCCGGCTGTTTTACAGACAATCT

>Bcin04g02090 (MLST10), partial sequence [organism=Botrytis cinerea, strain D11\_M\_E07]  
TGCGGAGGATGATATGGCAAAGTCTATGATTACCAAAGCATTTGTAGGCATGAGTAGTAAACTGTGCGAATATGACTATGAATGATGTTTACAAG  
CCCTACATCCATGTAAGAAAATGTAGAATAGAGAGATCAGTAACCTGGAACATAATATCGTTTGTAGGCTTTCAAGTTACTTACGCAGTTCAACCCA  
ATCACTACAGCTATTGCCGAATCCCCTACTGTTCAAATGGCCGTCTCAGCAAATACCATCGAAAAGTACACACTGCTAGGCCCTTTCTTCAGAA  
TATCGCCTCTGCAACAGGAAAAGTTACCAGGGAATACTTCAGTGCGCCAAAAGACGATAGATAGGCGACACATTGCCACATCTCAAGATGCGTTAC  
GATTGACCTTACAAAACCCATCAAAAAAGATTTACTTGGATATCATCAACCCTTTGTTTCGAGCAAGTCCAATCGCAAAAAGCAAACCCCTGGATTG  
GTTTCGCTACATTGTGAATCAAAATCACAAGCGTCGAGCACTTCAGGTAGACCCGAAAGAAGTGTCTTCTGATGGCTTTATGCACAATGTCACCT  
GTCGTTCTAGATGGTCTTTGTGAGCCATTCATGGATACCACATTTCTCGAAAATTTGGAAGATTGATATTGATTATCTAAGACGTGCGCCTCGTG  
TAGATATCAAGGACGAGACCAAGTTGAACGCTGACGAGAAGGCTTCTGAGAAGTATTATGAGGACACTGTTCCCTGGCACTTCTAATTTTCATCTC  
TGAGGTCTTCTTTCTCACATTGGCTGCTTCATCATTTATGGTAGTGAAGCTCTTAATGCCACGCATAAGAGTCTGGAGAAAAGACATCAAATATAT  
CAAAAGCAATTGACTGCCGTTGAAGCA

>Bcin01g07220 (MLST1), partial sequence [organism=Botrytis cinerea, strain D11\_M\_W04]  
ATGGCATATCTTGTCTTTCTTTTCGCATTATGCTTTGGAACGTGCTGGACAAGCTTGGGTTAGTGCTCTGCGTGTAGAAGCACTAAAGAAGATTCT  
CGCACAACCGAAGTCATGGTTTGGGAATCCAGGAATTCACCTGGCCGGTTGAACGAAGTTTTGGATAGGAACTCTGAGGAAATGCGTAATCTC  
GTTGGCCGCTTTGCTGGTATTGTATTCACAGCATTTTTTATGCTATTTGATATCAATCATTTGGGCTTTTTGTGAATACATGGAAACTGACATTAG  
TCTCGATGGCAACTGGGCCAGTTATATACGCTGTCAACAAAACATTCAAATCGCGTGAGTGGAAAATGGGAAAACAAGTGCAACTACGCCCTCTGA  
AATGACCACTGGCAAATTTTCAGAGACTTTCTCCAACATCAAAGTGGTTTCGGGCTTTTACTCTGGAACCTTACTTTGAGACAAAACACACCCAAA  
GCTACAGAAGAACTTTATAAAAAGTTGGACTAATACGAGCAAACCTACTCGGGATTGCTGTGGGGATTGACAGATGCGATGTCATTTCTCATCACT  
GCAACTATCTTTTATTTATGCCACGGTTCTCATTACCAAGAGAGAGATCAGTATCGCGACTGCACCTACAGACTGTCAATCTTCTATTTATTTGGTA  
TTTTTAATAGTACGAATATGCTGGCCATGATACCACAAAATCAAACCTTCTCGCGTTACAGCTACGCATATGCTTGCATTAGCCAATCTCGATTCT  
ATCTTCTCCACGAAAATAAAGGAACCGAACGGCTTTTCGACAATCCTTCCAATCAAATTCACCGTCTTTTCATTACATACCCTACTCGTCCCT  
GAAAAACGAACGATATCATCCTTTTCTCTTTCCCTGATTCCCTAACTCAACAACCTGCACCTTGTGCGACCCTCCGGCTCCGGAAAATCTACAATAG  
CTGCTCTGCTCATTGGTCTCTATCCGCCAGATACTTCAACACCTCCACCGTTGACATTCAAATCGCGTCTCCATAAGTAACTGTCACATTCGGTC  
TCTCCGGGCTTCTCTCTCACTCGTTCCACAAAATACCGATTCTATTTCCAGCTACCATTCTCCATAACATCATTTATGGTCTCCAGAATCTTCT  
CCTTGTGCTAGTCTTCCATCAGCTATTGCATCAGCAAAAGATGCTGGGATCCATGAATTTATCACATCGCTTCCACAAGGTTATGATACTATG

>Bcin05g07690 (MLST2), partial sequence [organism=Botrytis cinerea, strain D11\_M\_W04]  
ACCACTATCACAAGTCTTTTCTGCACTTTCTCATCAAAAACGAACGAGAACATCATCAATAAATACTTTGCTGAAGTAAATGGGTTTTATT  
TTGGCCAGGATGCCTTCTCTACGACAGCAAGCCTTCGATGATATGTTGTGGGTAGTTCTTGGCTGGCTGGATACTGTCAAATTCATTGATTT  
ACATTCTGAATTCGACTATTCAAACGACTCTCAGCCAGAAATGGTACGGACAACAATATAAACCTGCATTTGCACATCGAGCGCGACTATTTTGG  
GAATTGGCTTCAACAAGGATGGGATACTACTCTCTGTGGTGGTGGGATGATATGGTCACCATACCTTACTCCATAACAAGAACGCAATTACCAATG  
AACTCTATATCGCAGCTTCGATATCGATGTACCTATATTTCCCGGAGATGACAATCAATCCCATTATGCTTTCCAACCTTTCATATCCACC  
TCAGATCCGAAATATCTACAGGCAGCTGTTGATGCTTACAAATGGCTGAATGGTTCCAACATGACGGATTTACAAGGATTTATATGTCGACGGG  
TACCATATCTCGAATCTTTCTGGCGGTGAAAAACCCATTCGCGATTCTAGAAATGAGATGGTATATACCTACAATCAAGGTGTTTTGCTTACTG  
GACAACGTGGTTTGTATGACGCAACCGCCGACGATCATACCTTGTAGATGGCCACAAACTCATCGCAATGTTATTAATGCCACAGGCTATGA  
CCTGAAACACAATGTTGTCATCTCACCGCCACCCAAAGATGGTTCCGCATTGGCAAAGTGGTTTGGCTGGGTAGGAATGGAATACGGAAGAA  
GGATGCGATTCAAGTGCTTCGTGTTCTCAAAAATGGACAAAATTTCAAAGGCATATTTCTTTTCATCACTTGAATGCGTTCGTAGTGAATTTGCCAG  
GGGAGCCTATTGCAGGGACGAAGGAAAGCTTAGAACTCGACAGAGTGTGGCATTCTGACAAAATGCTCACAGTATACAAAAT

>Bcin06g01710 (MLST3), partial sequence [organism=Botrytis cinerea, strain D11\_M\_W04]  
GTGAGTCTGACTTTTGTATTTGAGCGTTAAGATAGACTCTGATATACCAAGGCAATCACCTAATTTTCATGGCGTCTTCCCTGCATCATCTACC  
TACCCTGGAATGCTGGGAGAATTATACTCAGCAGCTTTTCACAGCTCCTGCTTTCAATTGGATCTGTTCCCTGCTGTGACAGAATTGGAGACGG  
TTGTAATGGATTGGTTGGCCAAGCTTCTCAATCTCCAGACTGTTATTTGTCGTCGACTCATGGTGGTGGTGTATCCAAGGATCAGCCTCGGA  
AGCTATCGTTACCGTTATGGTTGCTGCCCGGATAAGTATCTTCGTGAAACCACTGAAGGTCGTGCGAATTTGAACCTCGAGGATGCGATTGCAT  
ATAAGAGGAGTAAGCTAGTTGCACTAGGAAGCGAAAATGGCACACAGCTCCACGCAGAAAGCAGCGCAGATAGCTGGCGTTAGATTCGGATCGAT  
TCCAGTACTCGCATCCAATGATTTCCGCAATGACGGGTGATGATTTAGAGAAGGTATTGAAAGAATGCAAATCTCAAGGATTTGGAACCTTCTAT  
CTAACTTCGACGTTGGGAACAACATCTACATGCGCAGTTGACGACTTCGCATCTATTGCAACAGTACTTTCAAATATGCACCTCCAGATGTTG

```
CAGGCGAGATCTGGGTTACGTCGATGCTGCTTATGCAGGTGCAGCTTTGGTTTGCCCTGAATACCATCATCTAACATCGTCCCTCCAGCATT  
CCATTCCTTTGATATGAACATGCACAAATGGCTTCTGACAAATTTTCGACGCTTCTTGCCTATATGTCAAGAAACGCAAAGATCTGATCGATGCA  
CTCTCCATAACACCAAGTTATCTTCGCAACGAGTTTTTCAGAGAGTGGACTCGTAACCGACTATCGGGACTGGCAAATTCCTCTCGGAAGACGCT  
TCCGAAGCTTAAAGATTTGGTTTGTCTCAGAACCTAC
```

>Bcin09g03030 (MLST4), partial sequence [organism=Botrytis cinerea, strain D11\_M\_W04]

```
ACCCTTCAACCCACCGCAGCTCCTATACCGAAAAGCGAGTATCCTACCAATTCTCCTTCCACCTGCGACTTTAAGACCATTGGCTTTCCGCACT  
TTCACAAAAAAGCATAGTTTAAACATTGACGTCGTCGGCATTACAAGTGTGGCTACTTTTATTTGGAAAGCATTGTGGGACAGGATGGAGGGAAG  
AAGGACTGGCAGAGAGAGTCTTGGAGGAGGTCGCCAAGAGTTGGAAGAATAGGAGTGGCGGTGTCATTGTGCGAGGGCAGGGAACGGAATTGAA  
GGAGATTCTGAAAGCTTTGGAAGGGAATATGAGTGGTGGAAAGGATAGTCATAGGAAGAGAGCTAAGCCGGCAGAATAGTTTAGTACTGGGATCA  
TCACAATATGGAGAGGTCAATCATACAAGACTTGGGCTACGGCCAGGGAATATACCCAGAGAGGATAGTCAGTCAAGTTTGGGAATGTCAACGT  
TGGAGGTCAATGACGAGGAAGATGAGGATGGCCTGATGGATCCAAGAAGTGGTTAAAAGTCATTGATGCATTTGAGCAACCTCGACTGGTGT  
CAATGTTGCTAAAAAGCACTTTGATAGGTATGTTTCAATGATAAAAATTTTATCTGAATCGACTAACTCAGTACAGAGATACCTCCAAACCTTCA  
TTGTTCCACCTGCGTCTCATAAAACACTCCTCTTCCAAAACCGCTATAATGTTATCCATCAACGTCTCCTTCCGAATGAATCTTTTCAAACGC  
CCGCTTTTCAAGGTGGCAAATCTTCCCTTCAACGCAGCAGCTCCGCCATTACCACCCAACAACAATCATACAAATTAACGCCGATAGCTAATCT  
TCTCGGTCGCAATCGCAGCTCTCATATGCTTCTCGGTCTCCTCAGTATTTACCCACTGGTACCCTCGCCATCAATGACCTGACGGGCAGTATC  
GCTCTCGATCTTACACACGCAGCAGCCATTCC
```

>Bcin11g01310 (MLST5), partial sequence [organism=Botrytis cinerea, strain D11\_M\_W04]

```
ACTGACATGGACCTCATGTGGAACCGGCGTAGAATGCGCAACGCTTGAAGTTCGCTCGAATATGGCGATGCAACGTCAACGGCAAAGCCAGT  
GTTGCGCTTGCTCGTTATCTGCCACTGTTGCCGCGAGCAAGAAGCTCGGGTCTCTCTTGATAAACCCCGGTGGACCCGGTGCCTCTGGTGTG  
GCTTTGTGCACTTGGAGCCGGTGCCCGCTCTCGACACTGAGTGGTGGATTGTACGATATCATCGGATGGGATCCACGTGGAACCGGTGCTTC  
GGCTCCTATTTTGGAAATGTTTTGCAAATGCCAGTGCAGGATGATTTTAAACAACGCTTTCCATCTGCTCCGAATCTCTGGCTCGGACAATTT  
GCGAATGCCAGCGCAAATCTGCTGTTAGCTCTGCTATCACATCCTTTGACACTTCTGTGCTGCTCTTGCAAAGCTTGCCTGGCTCAGAAAT  
CTCCCGCTCTTTACACCTCAACAGCAGCATATGTTGCTCGAGACATGGCAGCGATAGTCGATGCATTGGATGGGACCTCTGCAAACCTTAACTA  
CTGGGGTTTCTCATATGGAACCTATTTTCCCTAGCTGAGTTTATCCAACTTTCCCGAGCCGTGTGGGAAGAGTTCTTGCCGATGGTGTTCGAC  
GCAAAGGCAAATGCACTCACATACGTTAGCCAACCTTCCAACGATCAACTCAGTGTTCGTGCTTTCGTTGAACGATTTTGCAGCTTTCTGCACCA  
CCGCCGGTAGTAAAGGTTGCTCTTTTGCACC GCCCTACTGGAACCTCAGGTAAGTGTGCTACCAGACTGGACAACATAATGAAGGATATGTT  
CCTCAATCCTATTGTTGCTTCGGGCTTAAAGCATCA
```

>Bcin15g03910 (MLST6), partial sequence [organism=Botrytis cinerea, strain D11\_M\_W04]

```
GCCAAAACACAAAATCATCCAACGATGAAGATGATACTCCACTTCCCTTGATTATCTGGCATGGACTCGGGCATAAATTACAAAGCGGATGGTCT  
TGCGCAAGTTGGAAAACCTAGCTGAAGCTATTCATCTGGGACTTTTGTCTACAATATTCATGTAGATGAGGATGCATCTGCAGATAGGACAGCT  
ACCTTCTTTGGAAATCTCACTCGTGAGTACATCCCTATTTTTTCCCTTAAATATCATACTAACTCTCTTACCAAGTTCAAATCGAAAAGGTCTG  
CGAAGACCTCGCCTCCATCCTATTCTCTTACC GCGCCCGCTCGACGCAATTGGATTCTCCAAGCGGCCAATTTCTTGCCTGGTTACATA  
TCCCCTGCAATGCTCCACCATCCGCTCTCTCTGACCTTTGGTTCCCAACACAACGGCATTCTGCTTCCAAGCCTGTGGTCTCGCGATT  
TCCTCTGTGCGGGTCTCAAACCTTTTGGCATCCAACACCTGGTCAACCTTTGTCCAATCTCGTCTCGTACCCGCTCAATACTTCAGAGATCC  
GGAAAACCTAGACTCTTACCTTGAATATTTCAATTTCTTGGCGACATCAATAATGAGCGGTTCTCAAGAACCAAACATATAAATCCAACATG  
GAAAAATTGGAACGATTCGTAATGTATGCTTTGAAAGACGACACAACCTGTCAATCCTAAGGAAAGTGGATGGTGGGCTGAAGTCAACGGCACGG  
AAGTTACACCACTGAAAGAAAAGAGCCATTTATAAAAGAAAGATTGGCTAGGTTTAAAGACATTTGGATGAGGCCGAAAATTAGTTTTCGAAACCAT  
TCCAGGGGGACATATGACGTTAGGAGAGGAGATGCTAGAGAAGGCTTTCAAAGAGTATTTTGGTCCAGCAGGGAAGAAATTTGGGG
```

>Bcin16g03460 (MLST7), partial sequence [organism=Botrytis cinerea, strain D11\_M\_W04]

```
ATGAACCTCTTGATTTGAACTCTTCATTAATTGCAAGTGATGAACCCCTATTCTGCCAGAGGATAGTTACAAGACGTATATCATTAGTCGAGA  
ACCCTCATGATATATATTGACGGATTTTGGAAAGCGAATGAAAGTAAACATTTGGTTGATGTTAGGTGTGTTATTTATTTCTGATGAAATGAAC  
AAGAGAGACTGATGAGATAGTGAGCCGCTTTATGAACCGTCAACTGTTTCTCACGGACAGGAAGTTACCATTGATCCTTCAGTTCCGAATTCG  
AAGTGGCGGTTTTAGAGAGGGATGAGGTGGTCAAGGTGATTTGAGCATAGAGCGAGGGCATTTCAGGGGTGGAGGGGCGAGATGGGGATTGAGAA  
GTTGAGGACGCAGAGGTATGGGGTTGGAGGACATTATGGGATGCATTTGTAAGTTTTGGGGGATTGACGAAGGCTTTTGTCTATTTTCTACCAG  
TACGGATCTTGAAGAAAAGATAGCATGAACACGAGGGCTAATAACTAGGAAATAGCGATTGGAGCGGAGGTAACGTTGGCATAGACCGATTTAG  
TACTTTTATGTTCTATGTCGACGATCCTCTGATATCGAAGGTGGAGGAACGGAAATCCCACGTATCGTGGGACCAAAGGAGGAAGGTGGGAG  
GACTTCTGGAAAACCTACGGAAGCATTTGGATCCAAGAACTGGAGAAAAATGTAACAGTAGAAGGGGTGACATTCAAACCAATCAAGGGAAATGCCG  
TATTCTGGGAAAATACTGACAACAACGGGAGGGGCTATGATG
```

>Bcin12g03020 (MLST8), partial sequence [organism=Botrytis cinerea, strain D11\_M\_W04]

```
CGATTGGCTGCGAAGAAAACCTGCGCAGCACCGAGTCACCAAAAGCACGAATAAACCATCGGCAAGGGAATATTTCTCTGAACCACAACATGACA  
CGAGCGCGAAGAGTATATCGGGCGAGAAGCTTCATCAAGAGCACCAAAGCGACAACGATCGATGATAAATTATAACTCTTACGGTGGAAAGAAA  
TGAAAATACAGCAGCTTATGCTTCCGGGAAACTTCCATCTGGAAGTATAAATGTTGGTGGAGGTAGGAAGACCCTTTTCAAGAAGAACACGA
```

```
ACGGCATTGTCGCTGGCAAGTTGCCCCCTGGAAGTATCAACATTGGTGGAAAGAAGGCTACCCAAATCGAGGACGAGGGTAGAGCAGCTTATG
CTTCCGAAAAATTGCCCTCAGGAAGTATAAACTCTGGCGCAAAGAAGGCGATTTCAATCCAAGATGAAACGAGACCGGCTTATGTCTCCGAAA
GCTTCCACATGGTAGTATCGACGGTATGCGAAAACCGTGAAATGGCTGCCGTCCACCCGCGAAATTTGCTGAGGGTGGGAGGAAACCAGGCCAGGTT
GTCTCTTCTCTATTACATTTCAATCCTACTTCAAAGAAAACTTTTGATGAACCCGAAAGAACAAAGCGGAACCGGCAAACCATCCAATGCGCCTT
TGACAGAGGAAATGGCGACTTTACCAATCTAGGGTTATCGAGAAGGCTTGCAGCCCATCTATCGACTAAACTCGATATGAAAGCTCCGACCGC
CATTCAAAAAGCATCTGTACAGCAGTTGGTATCGGACGATAGCGATGCTTTCATACAAGCAGAGACTGGATCTGGAAAACTTTGGCATATCTA
CTACCTATAGTCGAGCGAATATTAGCATTGAGTGAGAATGGCGTACAAA
```

```
>Bcin02g07770 (MLST9), partial sequence [organism=Botrytis cinerea, strain D11_M_W04]
CAGCTTTCCCTTTCCGGTCTTGGCATCTACAGTCATTGCCATCCCTACACCATCACAACCTTGAGTCTCGGGCCGTTATCGATTCCGATGCCGTTG
TAGGATTTGCCGAAACTGTTCCAGTGGGACCGTAGGAACAGTTTATGAGGCATATAAACCATTCCTTAAAGTCGTAAATGGATGCGTACCATT
CCCTGCCGTGCATGTCATCGGTAACACAGGGTATGTCTTATATCTTTCTCTTCCACACGATTGCTATTGAGTCTCTAACATATTTTAGTGGTG
GTTTGTACCAACTGGCAGTAGCAATGGTGGTTGCAGCAGCAGTACCGGTCAAGTATATGTTTCGAGGAGGACAAAGCGGATCAAACCTACGCCAT
CATGTACTCTGGTAAAGTTCTCTCTAAACTTCTCTTATAGATCCAACCTAACAAAACTTTAGGTACATGCCAAAGGACGAGCCCTCAACCGGT
ATTGGTACCCTGTCAGATTGGGAAGGTGTAATTGCTGCTTCCAGCGCCACCGCCACAACCTGCCGACAACATCTTAGCCGTTTGTCTTCCG
CCCACGGAGGCTGGGATTGTTCCACGGATGGCTATTCCCTTCTGGTACCAGCCCTTATCAAGTACGAAAGTATCTGGCCCGTCGATCAGCTC
AATGGGTCTTACTAGTACTGTTGGTGGAAAAACAACCTATGATTGCTTGGGAGTCTTACCAACTGCTGCTCAAACCTGCTCTTGAGAACACCGAT
TTCGGTGTGCGAATGTTCCATTCAATCCGGCTGTTTTACAGACAATCT
```

```
>Bcin04g02090 (MLST10), partial sequence [organism=Botrytis cinerea, strain D11_M_W04]
CGGAGGATGATATGGCAAAGTCTATGATTACCAAAGCATTTGTAGGCATGAGTAGTAAACTGTCGAATATGACTATGAATGATGTTTACAAGCC
CTACATCCATGTAAGAAAATGTAGAATAGAGAGATCAGTAACTGGAACATAATATCGTTTTGTAGGCTTCAAGTTACTTACGCAGTTCAACCCAAT
CACTACAGCTATTGCCGAATCCCCACTGTTCAAATGGCCGCTCAGCAAATACCATCGAAAAGTACACACTGCTAGGCCCTTTCTTCAAGAATA
TCTCTCTGCAACAGGAAGTTACCAGGGAATACTTCACTGCGCCAAAGACGATAGATAGGCGACACATTGCCACATCTCAAGATGCGTTACGAT
TGACCTTACAAAACCATCAAAAAGATTTACTTGTATATCATCAACCCTTTGTTTCGAGCAAGTCCAATCGAAAAAGCAAAACCCCTGGATTGGTT
CGCTTACATTTGTGAATCAAAAATCACAAGCGTCGAGCACTTCAAGTAGACCCGAAAGAGTGTCTTCTGATGGCTTTATGCACAATGTCACCTGTC
GTTCTAGATGGTCTTTGTGAGCCATTCAATGGATACCACATTTCTGAAAATTTCAAGATTGATATTGATTATCTAAGACGTGCGCCCTCGTGTAG
ATATCAAGGACGAGACCAAGTTGAACGCTGACGAGAAGGCTTCTGAGAAGTATTATGAGGACACTGTTCTTGGCACCTTCAATTTTCACTCTGA
GGTCTTCTTTCTCACATTTGGCTGCTCATATTATGGTAGTGAAGCTCTTAATGCCACGCATAAGAGTCTGGAGAAAGACATCAAATATATTTCAA
AAGCAATTGACTGCCGTTGAAGCAGA
```

```
>Bcin01g07220 (MLST1), partial sequence [organism=Botrytis cinerea, strain D11_T_B09]
GATGGCATAATCTTGTCTTTCTTTCGCATTATGCTTTGGAACGTGCTGGACAAGCTTGGGTTAGTGCTCTGCGTGTAGAAGCACTAAAGAAGATTC
TCGCACAACCCGAAGTCATGGTTTGGAGGAATCCAGGAATTCACCTGGCCGTTGAAACGAAGTTTTGGATAGGAACTCTGAGGAAATGCGTAATCT
TGTTGGCCGCTTTGCTGGTATTGTATTACAGCATTTTTTCATGCTATTGATATCAATCATTTGGGCTTTCGTGAATACATGGAAACTGACATTA
GTCTCGATGGCAACTGGGCCAGTTATATACGCTGTCACCAAAACGTTCAATCGCGTGAGTGAAAAATGGGAAAAACAAGTGCAACTACGCCCTCTG
AAATGACCACTGGCATAATTTTCAGAGACTTTCTCCAACATCAAAGTGGTTGCGGGCTTTTACTCTGGAAACTTACTTTGAGACAAAACACACC
AGCTACAGAAGAAGCTTTATAAAGTTGGACTAATACGAGCAAACCTACTCGGGATTGCTGTGGGGATTGACAGATGCGATGTCATTTCTCATCACT
GCAACTATCTTTTATTTATGCCACGGTTCTCATTTACCAAGAGAGAGATCAGTATCGCGACTGCACTACAGACTGTCAATCTTCTATTTATTTGGTA
TTTCTAATAGTACGAATATGCTGGCCATGATACCACAAATCAAACCTTCTCGCGTTACAGCTACGCATATGCTTGCATTAGCCAATCTCGATTC
ATCTTCCCTCCCACGAAAAATAAAGGAACCCGAACGGCTTTTCGACAATCTTTCCAATCAAATTCACCCGCTTTTCAATTCACATACCCCTACTCGTCCC
GAAAAACGAACGATATCATCTTTTCTCTTTCCCTGATTTCTAACTCAACAACTGCACTTGTGCGACCCCTCCGGCTCCGAAAAATCTACAATAG
CTGCTCTGCTCATTTGGTCTCTATCCGCCAGATACTTCAACACCTTACCCTTGGACATTCATTCGCGTCTCCATAAGTAACGTGCACATTCGGTCT
TCTCCGGGCTTCTCTCACTCGTTCCACAAAATACCGATTCTATTTCCAGCTACCATTCTCCATAACATCATTTATGGTCTCCAGAATCTTCT
CCTTGTGCTAGTCTTCCATCTGCTATTGCATCAGCAAAAGATGCTGGGATCCATGAATTTATCACATCGCTTCCACAAGGTTATGATACTAT
```

```
>Bcin05g07690 (MLST2), partial sequence [organism=Botrytis cinerea, strain D11_T_B09]
TCACCCTATCACCAGTCCCTTTTCTGCACTTTCCCTCATCAAAAACGAACGAGAACATCATCAATAAACTTTGCTGAAGTAATTGGGTTTTTA
TTTTGGCCAGGATGCCCTTCTCTACGACAGCAAGCCTTCGATGATATGTTGTGGTAGTTCTTGGCTGGCTGGATACTGTCAAATTTATTTGAT
TTACATTTCTGAATGCACTATTCAAACGATTTCTCAGCCAGAAATGGTACGGACAACAATATAAACCTGCATTTGCACATCGAGCGGACTATTTT
GGGAATTGGCTTCAACAAGGATGGGATACTACTCTCTGTGGTGGTGGGATGATATGGTCACCATACTTACTCCATAACAAGAACGCAATTTACCAA
TGAACCTCTATATCGCAGCTTCGATATCGATGTACCTATATTTCCCCGGAGATGACAATCAATCCCATTTATGCTTTCCAACCCCTCATATCCA
CCTCACGATCCGAAATATCTACAGGACGCTGTTGATGCTTACAAATGGCTGAATGGTTCCAACATGACGGATTTACATGGATTATATGTCGACG
GGTACCATATCTCGAATCTTTCTGGCGGTGAAAAACCCATTTGCATTTCTAGAAATGAGATGGTATATAACCTACAATCAAGGTGTTTTGCTTAC
CGGACAACGTGGTTTGTATGACGCAACCCGCCGACGATCATACCTTGTAGATGGCCACAACTCATCGCGAATGTTATTAATGCCACAGGCTAT
GACCTGAAACACAATGTTGTCACTCTACCGCCACCCAAAGATGGTTCCGCATTTGGCAAAGTGGTTTGGCTGGGTAGGAATGGAATACCTGGAAG
AAGGATGCGATTCAAGTCTGCTGTTCTCAAATGGACAAAATTTCAAAGGCATATCTTTTCACTACCTGATTGCGTCTGTAGTATTGCTT
```

AGGGGAGCCTATTGCAGGGACGAAGGAAAGCTTAGAACTCGACAGAGTGTGGCATTCTGACAAATGCTCACAGTATACAAAAT

>Bcin06g01710 (MLST3), partial sequence [organism=Botrytis cinerea, strain D11\_T\_B09]

GGTGAGTCTGACTTTTGTATTTGAGCGTTAAGATAGACTGATATACCAAGGCAATCACCTAATTTTCATGGCGTTCTTCCCTGCATCATCTAC  
CTACCCCTGGAATGCTGGGAGAATTATACTCAGCAGCTTTCACAGCACCTGCTTTCAATTGGATCTGTTCCCTGCTGTGACAGAATTGGAGACG  
GTTGTAATGGATTGGCTGGCCAAGCTTCTCAATCTCCAGACTGTTATTTGTCTTCGACTCATGGTGGTGGTGCATCCAAGGATCAGCCTCGG  
AAGCTATCGTTACCCTTATGGTTGCTGCCCCGCGATAAAATATCTTCGTGAAACTACTGAAGGCTGTGCGGGCATTGAACTCGAGGATGCGATTGC  
ATATAAGAGGAGTAAGCTAGTTGCACTAGGAAGCGAAATGGCACACAGCTCCACGCAGAAAGCAGCGCAAATAGCTGGCGTTAGATTCGGATCG  
ATTCCAGTACTCGCATCCAATGATTTGCCATGACGGGTGATGATTTAGAGAAGGTATTGAAAGAATGCAAATCTCAAGGATTGGAACCCCTTCT  
ATCTAACTTCGACTTTGGGAACAACATCTACATGCGCAGTTGACGACTTCGCATCTATTGCAACAGTACTTTCAAAAATATGCACCTCCAGATGT  
TGCAGGCGAGATCTGGGTTACGTCGATGCTGCTTATGCAAGTGCAGCTTTGGTTTTGCCCTGAATACCATCATCTAACATCGTCTTTCCAGCAT  
TTCCATTCCCTTCGATATGAACATGCACAAAATGGCTTCTGACAAAATTCGACGCTTCTTGTCTATATGTCAAGAAACGCAAAGATCTGATCGATG  
CACTGTCCATAACACCAAGTTATCTTCGCAACGAGTTTTTCAGAGAGTGGACTCGTAACCGACTATCGGGACTGGCAAATTCCTCTCGGAAGACG  
CTTCCGAAGCTTAAAGATTTGGTTTGTCTCAGAACCTAC

>Bcin09g03030 (MLST4), partial sequence [organism=Botrytis cinerea, strain D11\_T\_B09]

GACCCTTCAACCCACCGCAGCTCCTATACCGAAAGCGAGTATCCTACCAATTCCTTCCACCTGCGACTTTAAGACCATTGGCTTTCCGCAC  
TTTCACAAAAAGCATAGTTTAAACATTGACGTCGTCGGCATTACAAGTGTGGCTACTTTTATTGGAAAGCATTGTGGGACAGGATGGAGGGAA  
GAAGGACTGGCAGAGAGAGTCTTGGAGGAGGTCGCCAAGAGTTGGAAGAATAGGAGTGGCGGTGTCAATTTGTCGAGGGCGAGGGAACGGAATTGA  
AGGAGATTCTGAAAGCTTTGGAAGGGAATATGAGTGGTGGAAAGTAGTCATAGGAAGAGAGCTAAGCCGACAGAATAGTTTAGTACTGGGATC  
ATCACAATATGGAGAGGTCAATCATAAAGACTTGGGCTACGGCCAGGGAATATACCCAGAGAGGATAGTCAGTCAAGTTTGGGAATGTCAACG  
TTGGAGGTCAATGACGAGGAAGATGAGGATGGCTGATGGATCCAAGAAGGTGGTTAAAAGTCAATGATGCATTTGAGCAACCTCGACTGGTGT  
ACAATGTTGCTAAAAAGCACTTTGATAGGTATGTTTCAATGATAAAAATTTTATCTGAATCGACTAACTCAGTACAGAGATACCTCCAAACCTTC  
ATTGTTCCACCTGCGTCTCATAAAACACTCCTCTTCCAAAACCGCTATAATGTTATCCATCAACGTCCTTTCGCAATGAATCTTTTCAAACG  
CCCGCTTTTCAAGGTGGCAAATCTTCCCTTCAACGCAGCACGTCGCCATTACCACACAACAACAATCATACAAATTAACGCCGATAGCTAATC  
TTCTCGGTTCGCAATCGCAGCTCTCATATGCTTCTCGGTCTCCTCAGTATTTTACCCACTGGTACCCTCGCCATCAATGACCTGACGGGCAGTAT  
CGCTCTCGATCTTACACACGCAGCAGCCATT

>Bcin11g01310 (MLST5), partial sequence [organism=Botrytis cinerea, strain D11\_T\_B09]

ACTGACATGGACCTCATGTGGAACCGCGTAGAATGCGCAACGCTTGAAGTTCCGCTCGAATATGGCGATGCAACGTCAACGGCAAAGCCAGT  
GTTGCGCTTGCTCGTTATCCTGCCACTGTTGCCGCGAGCAAGAAGCTCGGGTCTCTTTGATAAACCCCGGTGGACCCGGTGCCTCTGGTGTG  
GCTTTGTGAGTCTGGAGCCGGTGCCCGCTTCGACACTGAGTGGTGGATTGTACGATATCATCGGATGGGATCCACGTGGAACCCGGTGCCTTC  
GGCTCCTATTTTGGAAATGTTTTCGAAATGCCAGTGCAGGAGTATGATTTTAAACAACCGGTTTCCATCTGCTCCGAATCTCTGGCTCGGACAATTT  
GCGAATGCCAGCGCAAATTCGCTGTTAGTCTGCTATCACATCCTTTGACACTTCTGTGCTGCTCTTGCAAAAGCTTGCCTGGCTCAGAAAT  
CTCCCGCTCTTTACACCTCAACAGCAGCATATGTTGCTCGAGACATGGCAGCGATAGTCGATGCATTTGGATGGGACCTCTGCAAACCTTAACCTA  
CTGGGGTTTCTCATATGGAACATATCTTCTAGCTGAGTTTATCCAAACTTTCCAGGCCGCGTGGGAAGAGTCTTGGCCGATGGTGTTCGAC  
GCAAAGGCAAATGCACTCACATACGTCAGCCAACTTCCCAACGATCAACTCAGTGTTCGTGCTTCGTTGAACGATTTTGCAGCTTTCTGCACCA  
CCGCCGGTAGTAAAGTTGCTCTTTTGCACCGCCCTACTGGAACCTCAGGTACTGTTGCTACCAGACTGGACAACATAATGAAGGATATGTT  
CCTCAATCCTATTGTTGCTTCGGGCTTAAGCATCAG

>Bcin15g03910 (MLST6), partial sequence [organism=Botrytis cinerea, strain D11\_T\_B09]

GCCAAAACACAAAATCATCCAACGATGAAGATGATACTCCACTTCCCTTGATTATTTGGCATGGACTCGGCGATAATTACAAAGCGGATGGTCT  
TGCGCAAGTTGGAAAAGTACTGAAAGCTATTCATCTGGGACTTTTGTCTACAATAATTCATGTAGATGAGGATGCATCTGCAGATAGGACAGCT  
ACCTTCTTTGGAAAATCTCACTCGTGAGTACATCCCTATTTTCCCTTTAAATACCATACTAACTCTCTTACCAAGTTCAAATCGAAAAGGTCTG  
CGAAGACCTCGCCTCCCATCCTATTTCTCTTACCAGCGCCCGCGTGCAGCAATTGGATTCTCCCAAGGCGGCCAATTTCTTGCAGCGTTACATA  
TCCCGCTGCAATGCTCCACCCATCCGCTCTCTCTGACCTTCGGTTCCCAACACAACGGCATTCTGCTTCCAAGCCTGTGGTCTTCCGATTT  
TCCTCTGTGCGGGTGTCAAACCCCTTTTGCAGTCCAACACCTGGTCAACCTTTGTCCAATCTCGTCTCGTACCCGCTCAATACTTCCAGAGATCC  
GGAAAACCTAGACTCTTACCTTGAATATTTCAATTTCTTGGCGACATCAATAATGAGCGCGTTCTCAAGAACCAAACATATAAAATCCAACATG  
GAAAAATTGGAACGATTTCGTAATGTATGCTTTTGAAGACGATACTGTCATCCCTAAGGAAAGTGGATGGTGGGCTGAAGTCAACGGCACGG  
AAGTTACACCACTGAAAGAAAGAGCCATTTATAAAGAAGATTGGCTAGGTTTAAAGACATTTGGATGAGGCCGAAAATTAGTTTTTCGAAACCAT  
TCCAGGGGGACATATGACGTTAGGAGAGGAGATGCTAGAGAAGGCTTTCAAAGAGTATTTTGGTCCAGCAGGGAAGAAAATTTGGGG

>Bcin16g03460 (MLST7), partial sequence [organism=Botrytis cinerea, strain D11\_T\_B09]

ATGAACCTCTTGATTTGAACTCTTCATTAATTGCAAGTGTGAAACCCCTATTTCTGCCAGAGGATAGTTACAAGACGTATATCATTTAGTCGAGA  
ACCACCTCATGATATATATTGACGGGTTTTTGAAGCGAATGAAAGTAAACATTTGGTTGATGTTAGGTGTGTTATTTATTTCTGATGAAATGAAC  
AAGAGAGACTGATGAGATAGTGAGCCGCTTTATGAACCGTCAACTGTTTCTCACGGACAGGAAGTTACCATTGATCCTTCCAGTTCCGAAATTCG  
AAGTGGCGGTTTTAGAGAGGGATGAGGTGGTCAAGTGTATTGAGCATAGAGCGAGGGCATTTCAGGGTGGAGGGCGAGATGGGGATTGAGAA

```
GTTGAGGACGCAGAGGTATGGGGTTGGAGGACATTATGGGATGCATTTGTAAGTTTTGGGGGATTGACGAAGGCTTCTGTCTATTTTCTATCAG
CACGGATCTTGAAAGAAAAGATAGCATGAACACGCGGGCTAATAACTAGGAAATAGCGATTGGAGCGGAGGTAAACGTGGCATAGACCGATTTAG
TACTTTTCATGGTCTATGTCGACGTATCCTCTGATATCGAAGGTGGAGGAACCGGAATTTCCACGTATCGTGGGACAAAAGGAGGAAGGTGGGAG
GACTTCTGGAAAACACGGAAGCATTTGGATCCAAGAACTGGAGAAAAATGTAACAGTAGAAGGGGTGACATTCAAACCAATCAAGGGAAATGCCG
TATTCTGGGAAAATACTGACAACAACGGGAGGGGCTATGAT
```

```
>Bcin12g03020 (MLST8), partial sequence [organism=Botrytis cinerea, strain D11_T_B09]
CGATTGGCTGCGAAGAAAACCTGCGCAGCACCAGTACACAAAAGCACGAATAAACCATCGGCAAGGGAAATATTCTCTGAACCACAACATGACA
CGAGCGCGGAAGAGTATATCGGGCGAGAAGCTTCATCAAGAGCACCAAAGCGACAACGAGTCGATGATAATTATAACTCTTACGGTGGAAAGAAA
TGAAAATACAGCAGCTTATGCTTCCGGGAAAACCTCCATCTGGAAGTATAAATGTTGGTGGAGGTAGGAAGACCACCTTTTCAAGAAGAACCCTCGA
ACGGCATTGTCGCTGGCAAGTTGCCCCCTGGAAGTATCAACATTTGGTGGAAAAGAGGCTACCCAAATCGAGGACGAGGGTAGAGCAGCTTATG
CTTCCGGAAAATTTGCCCCAGGAAGTATAAACTCTGGCGCAAAGAAGGCGATTTTCATTCCAAGATGAAACGAGACCAGGCTTATGTCTCCGGAAA
GCTTCCACATGGTAGTATCGACGGTATGCGAAACCGTGAAATGGCTGCCGTCCACCGCGAAAATGCTGAGGGTGGGAGGAAACCAGGCCAGGTT
GTCTCTTCTCCATTCACATTCATCTACTTCAAAGAAAACCTTCGATGAACCAGAAGAACAAGCGGAACCGGCAAACCATCCAATGCGCCTT
TGACAGAGGAAAATGGCGACTTTACCAATCTAGGGCTATCGAGAAGGCTTGCAGCCCATCTATCGACTAAACTCGATATGAAAGCCCCGACGGC
CATTCAAAAAGCATCTGTGCAGCAGTTGGTATCGGACGATAGCGATGCTTTCATACAAGCAGAGACTGGATCTGGAAAAACCTTTGGCATATCTA
CTACCTATAGTCGAGCGAATATTAGCATTTGAGTGAGAATGGCGTACAAA
```

```
>Bcin02g07770 (MLST9), partial sequence [organism=Botrytis cinerea, strain D11_T_B09]
CAGCTTTCCCTTTTCGGTCTTGGCATCTACAGTCATTGCCATCCCTACACCATCACAACCTGAGTCTCGGGCCGTTATCGATTCCGATGCCGTTG
TAGGATTTGCCGAAAACCTGTTCCAGTGGGACCGTAGGAACAGTTTATGAGGCATATAAACCATTTCTTAAAGTCGTAAATGGATGCGTACCATT
CCCTGCCGTGCGATGCATCGGGTAACACAGGGTATGTCTTATATCTTTCTCTTCCACACGATTGCTATTGAGTCTCTAACATATTTTAGTGGTG
GTTTGTCAACCAACTGGCAGTAGCAATGGTGGTTGCAGCAGCAGTACCGGTCAAGTATATGTTTCGAGGAGGACAAAGCGGATCAAACCTACGCCAT
CATGTACTCCTGGTAAAGTTCTCTCTAAACTTCTCCTTATAGATCCAACCTAACAAAATCTTAGGTACATGCCAAAGGACGAGCCCTCAACCGGT
ATTGGTACCGTACGATTGGGAAGGTGTAATTTGCTGGCTCTCCAGCGCCACCGCCACAACCTGCCGACAACATCTTAGCCGTTTGTCTTCCG
CCCACGGAGGCTGGGATTGTTCCACGGATGGCTATTTCCCTTTCTGGTACCAGCCCTCTTATCAAGTACGAAAGTATCTGGCCCGTCGATCACTC
AATGGGTCTTACTAGTACTGTTGGTGGAAAACAACCTATGATTGCTTGGGAGTCTTTACCAACTGCTGCTCAAACCTGCTCTTGAGAACACCGAT
TTCGGTCTGCGAATGTTCCATTCATTCGGCTGTTTTTCACAGACAATCT
```

```
>Bcin04g02090 (MLST10), partial sequence [organism=Botrytis cinerea, strain D11_T_B09]
CGGAAGATGATATGGCAAAGTCTATGATTACCAAAGCATTTGTAGGCATGAGTAGTAAACTGTCGAATATGACTATGAATGATGTTTACAAGCC
CTACATCCATGTAAGAAAATGTAGAATAGAGAGATCAGTAACTGGAACATAATATCGTTTTGTAGGCTTTCAAGTTACTTACGCAGTTCAACCCAAT
CACTACAGCTATTGCCGAATCCCCACTGTTCAAATGGCCGTCTCAGCAAAATACCATCGAAAAGTACACACTGCTAGGCCCTTTCTTTCAGAATA
TCTCCTCTGCAACAGGAAGTTACCAGGGAATACTTCAGTGCGCCAAAGACTATAGATAGGCGACACATTGCCACATCTCAAGATGCGTTACGAT
TGACCTTACAAAACCATCAAAAAGATTTACTTGTATATCATCAACCCTTTGTTTCGAGCAAGTCCAATCGAAAAAGCAAAACCCCTGGATTGGTT
CGCTACATTGTGAATCAAAAATCACAAGCGTCGAGCACTTCAGGTAGACCCGAAAGAGTGTCTTCTGATGGCTTTATGCACAATGTCACCTGTC
GTTCTAGATGGTCTTTGTGAGCCATTTCATGGATACCACATTTCTCGAAAATTTGGAAGATTGATATTGATTATCTAAGACGTGCGCCTCGTGTAG
ATATCAAGGACGAGACCAAGTTGAACGCTGACGAGAAGGCTTCTGAGAAGTATTATGAGGACACTGTTCTGGCACCTTCAATTTTCATCTCTGA
GGTCTTCTTCTCACATTTGGCTGCTCATTTATGGTAGTGAAGCTCTTAATGCCACGCATAAGAGTCTGGAGAAAAGACATCAAATATATTTCAA
AAGCAATTGACTGCCGTTGAAGCA
```

```
>Bcin01g07220 (MLST1), partial sequence [organism=Botrytis cinerea, strain D11_T_B14]
ATGGCATATCTTGTCTTTTTCGCATTATGCTTTGGAACGTGCTGGACAAGCTTGGGTTAGTGCTCTGCGTGTAGAAGCACTAAAGAAGATTCT
CGCACAACCGAAGTCATGGTTTGGAGGAATCCAGGAATTCACCTAGCCGGTTGAACGAAAGTTTTGGATAGGAACCTGAGGAAATGCGTAATCTC
GTTGGCCGCTTTGCTGGTATTGTATTACAGCATTTTTTATGCTATTGATATCAATCATTGGGCTTTTCGTGAATACATGGAAACTGACATTAG
TCTCGATGGCAACTGGGCCAGTTATATACGCTGTCACCAAAACGTTCAATCGCGTGAGTGGAAAATGGGAAAACAAGTGCAACTACGCCCTCTGA
AATGACCACTGGCATATTTTCAGAGACTTTCTCCAACATCAAAGTGGTTCCGGCTTTTACTCTGGAAAACCTACTTTGAGACAAAACACACCAAAG
CTACAGAAGAACTTTATAAAGTTGGACTAATACGAGCAAACCTACTCGGGATTGCTGTGGGGATTGACAGATGCGATGTCATTTCTCATCACTGC
AACTATCTTTTATTATGCCACGGTTCTCATTACCAAGAGAGAGATCAGTATCGCGACTGCCTACAGACTGTCAATCTTCTATTATTTGGTATT
TCTAATAGTACGAATATGCTGGCCATGATACCACAAATCAACTCTTCTCGGTTACAGCTACGCATATGCTTGCATTAGCCAGTCTCGATTCAT
CTTCTCCACGAAAAATAAAGGAACCGAACGGCTTTTCGACAATCTTCCAATCAAATTCACACCTTTTCATTACATACCCCTACTCGTCTGAA
AAACGAACGATATCATCTTTTCTCTTTCCCTGATTCCCTAACTCAACAACCTGCACTTGTGCGACCCCTCCGGCTCCGAAAATCTACAATAGCTG
CTCTGCTCATTGGTCTCTATCCGCCAGATACTTCAACACCTCCACCGTTGACATTCATCGCGTCTCCATAAGTAACTGTCACATTCGGTCTCT
CCGGGCTTCTCTCTCACTCGTTCCACAAAATACCGATTCTATTTCCAGCTACCATTCTCCATAACATCATTTATGGTCTCCAGAATCTTCTCCTT
GTGCTAGTCTTCCATCTGCTATTGCATCAGCAAAAAGATGCTGGGATCCATGAATTTATCACATCGCTTCCACAAGGTTATGATACTAT
```

```
>Bcin05g07690 (MLST2), partial sequence [organism=Botrytis cinerea, strain D11_T_B14]
```

```
ACCACTATCACCAAGTCCCTTTCTGCACTTTCCCTCATCAAAAACGAACGAGAACATCATCAATAAAATACTTTGCTGAAGTAATTGGGTTTTATT
TTGGCCAGGATGCCTTCTCTCTACGACAGCAAGCCTTCGATGATATGTTGTGGGTAGTTCTTGGCTGGCTGGATACTGTCAAATTCATTGATTT
ACATTCTGAATTGCACTATTCAAATGACTCTCAGCCAGAATGGTACGGACAACAATATAAACCTGCATTTGCACATCGAGCGGACTATTTTGG
GAATTGGCTTTCACAAGGATGGGATACTACTCTCTGTGGTGGTGGGATGATATGGTCACCATATCTTACTCCATACAAGAACGCAATTACCAATG
AACTCTATATCGCAGCTTCGATATCGATGTACCTATATTTCCCCGGAGATGACAATCAATCCCCATTTATGCTTTCCAACCCCTTCATATCCACC
TCAGATCCGAAATATCTACAGGCAGCTGTTGATGCTTACAAATGGCTGAATGGTTCCAACATGACGGATTTACAAGGATATATATGTCGACGGG
TACCATATCTCGAATCTTTCTGGCGGTGAAAAACCCCATTCGCGATTCTAGAAATGAGATGGTATATACCTACAATCAAGGTGTTTTGCTTACTG
GACAACCGGGTTTTGTATGACGCAACC GCCGACGATCATACCTTGTAGATGGCCACAAACTCATCGCAATGTTATTAATGCCACAGGCTATGA
CCTGAAACACAATGTTGTCATCTCACCTCCACCCAAAGATGGTTCCGCATTGGCAAAGTGGTTTTGGCCTGGGTAGGAATGGAATACTGGAAGAA
GGATGCGATTCAAGTGCTTCGTGTTCTCAAAATGGACAAAATTTCAAAGGCATATTTCTTTTCATCACTTGATTGCGTTCTGTAGTGATTTGCCAG
GGGAGCCTATTGCGAGGACGAAGGAAAAGCTTAGAACTCGACAGAGTGTGGCATTCTGACAAAATGCTCACAGTATACAAAAT
```

>Bcin06g01710 (MLST3), partial sequence [organism=Botrytis cinerea, strain D11\_T\_B14]

```
GTGAGTCTGACTTTTGTATTTGAGCGTTAAGATAGACACTGATATACCAAGGCAATCACCTAATTTTCATGGCGTTCTTCCCTGCATCATCTACC
TACCCTGGAATGCTGGGAGAATTATACTCAGCAGCTTTACAGCACCTGCTTTCAATTGGATCTGTTCCCTGCTGTGACAGAATTGGAGACGG
TTGTAATGGATTGGCTGGCCAAGCTTCTCAATCTCCAGACTGTTATTTGTCTTCGACTCATGGTGGTGGTGTATCCAAGGATCAGCCTCGGA
GGCTATCGTTACCGTTATGGTTGCTGCCCGGATAAAATATCTTCGTGAACTACTGAAGGTCTGTCCGGCATTGAACTCGAGGATGCGATTGCA
TATAAGAGGAGTAAGCTAGTTGCACTAGGAAGCGAAATGGCACACAGCTCCACGCGAGAAAGCAGCGCAAATAGCTGGCGTTAGATTCCGATCGA
TTCCAGTACTCGCATCCAATGATTTCCGCATGACGGGTGATGATTTAGAGAAGGTATTGAAAGAATGCAAATCTCAAGGATTGGAACCCCTCTA
TCTAACTTCGACTTTGGGAACAACATCTACATGCGCAGTTGACGACTTCGCATCTATTGCAACAGTACTTTCAAAAATATGCACCTCCAGATGTT
GCAGGCGAGATCTGGGTTACGTCGATGCTGCTTATGCAGGTGCAGCTTTGGTTTTGCCCTGAATACCATCATCTAACATCGTCTTTCCAGCATT
TCCATTCTTCGATATGAACATGCACAAAATGGCTTCTGACAAAATTTGACGCTTCTTGTCTATATGTCAAGAAACGCAAAGATCTGATCGATGC
ACTGTCCATAACACCAAGTTATCTTCGCAACGAGTTTTTCAGAGAGTGGACTCGTAACCGACTATCGGGACTGGCAAATTCCTCTCGGAAGACGC
TTCCGAAGCTTAAAGATTTGGTTTTGTCTCAGAACCCTAC
```

>Bcin09g03030 (MLST4), partial sequence [organism=Botrytis cinerea, strain D11\_T\_B14]

```
ACCCTTCAACCCACCGCAGCTCCTATACCGAAAGCGAGTATCCTACCAATTCTCCTTCCACCTGCGACTTTAAGACCATTGGCTTTCCGCACT
TTCACAAAAAAGCATAGTTTAAACATTGACGTCGTCCGCATTACAAGTGTGGCTACTTTTTATTGGAAAGCATTTGTGGGACAGGATGGAGGGAAG
AAGGACTGGCAGAGAGAGTCTTGGAGGAGGTCCGCAAGAGTTGGAAAGAATAGGAGTGGCGGTGTCAATTGTGCGAGGGCGAGGGAACGGAATTGAA
GGAGATTCTGAAAGCTTTGGAAGGGAATATGAGTGGTGGAAAGGATAGTCAATAGGAAGAGAGCTAAGCCGGCAGAATAGTTTAGTACTGGGATCA
TCACAATATGGAGAGGTCAATCATAACAAGACTTGGGCTACGGCCAGGGAATATACCCAGAGAGGATAGTCAAGTTTGGGAATGTCAACGT
TGGAGGTCAATGACGAGGAAGATGAGGATGGCCTGATGGATCCAAGAAGGTGGTAAAAGTCAATTGATGCAATTTGAGCAACCTCGACTGGTGTAC
AATGTTGCTAAAAAGCACTTTGATAGGTATGTTTTCAATGATAAAAATTTTATCTGAAATCGACTAACTCAGTACAGAGATACCTCCAAACCTTCAT
TGTTCCACCTGCGTCTCATAAAACTCCTCTTCAAAAACCGCTATAATGTTATCCATCAACGTCTCCTTCGCAATGAATCTTTTCAAACGCCCG
CTTTTCAAGGTGGCAAATCTTCCCTTCAACGCAGCAGTCCGCCATTACCACCCAACAACAATCATACAAATTAACGCCGATAGCTAATCTTCT
CGGTGCAATCGCAGCTCTCATATGCTTCTCGGTCTCCTCAGTATTTACCCACTGGTACCCCTGCCATCAATGACCTGACGGGCAGTATCGCT
CTCGATCTTACACACGCGCAGCCATTC
```

>Bcin11g01310 (MLST5), partial sequence [organism=Botrytis cinerea, strain D11\_T\_B14]

```
ACTGACATGGACCTCATGTGGAACCGGCGTAGAATGCGCAACGCTTGAAGTTCGCTCGAATATGGCGATGCAACGTCAACGGCAAAGCCAGT
GTTGCGCTTGCTCGTTATCCTGCCACTGTTGCCGCGAGCAAGAAGCTCGGGTCTCTCTTGATAAAACCCCGGTGGACCCGGTGCCTCTGGTGTG
GCTTTGTGCACTGAGGAGCCGGTGCCCGCTCTCGACACTGAGTGGTGGATTGTACGATATCATCGGATGGGATCCACGTGGAACCGGTGCTTC
GGCTCTATTTTGGAAATGTTTTGCAAATGCCAGTGGGAGTATGATTTTAAACAACGCGTTTCCATCTGCTCCGAATCTCTGGCTCGGACAATTT
GCGAATGCCAGCGCAAATTTCTGCTGTTAGCTCTGCTATCACATCCTTTGACACTTCTGTGCTGCTCTTGCAAAAAGCTTGCCTGGCTCAGAAAT
CTCCCGCTCTTTACACCTCAACAGCAGCATATGTTGCTCGAGACATGGCAGCGATAGTGCATGCATTTGGATGGGACCTCTGCAAAAACCTTAACTA
CTGGGGTTTTCTCATATGGAACATCTTCTTAGCTGAGTTTATCCAACTTTCCAGGCCGCTGGGAAGAGTTCTTGCCGATGGTGTTCGAC
GCAAAGGCAAATGCACTCACATACGTTAGCCAATTTCCCAACGATCAACTCAGTGTTCGTGCTTCGTTGAACGATTTTGCAGCTTTCTGCACCA
CCGCCGGTAGTAAAGGTTGCTCTTTTGGCACCCGCCCTACTGGAACCACAGGTAAGTGTGCTACCAGACTGGACAACATAATGAAGGATATGTT
CCTCAATCCTATTGTTGCTTCGGGCTTAAAGCATCA
```

>Bcin15g03910 (MLST6), partial sequence [organism=Botrytis cinerea, strain D11\_T\_B14]

```
GCCAAAACACAAAATCATCCAACGATGAAGATGATACTCCACTTCCCTTGATTATTTGGCATGGACTCGGCGATAATTACAAAGCGGATGGTCT
TGCGCAAGTTGAAAACTAGCTGAAGCTATTCATCCTGGGACTTTTGTCTACAATATTCATGTAGATGAGGATGCATCTGCAGATAGGACAGCT
ACCTTCTTTGGAAATCTCACTCGTGAGTACATCCCTATTTTCCCTTTAAATACCATACTAACTCTCTTACCAAGTTCAAATCGAAAAGGCTCTG
CGAAGACCTCGCCTCCCATCCTATTTCTCTTACC GCGCCCGCCGTCGACGCAATTTGGATTCTCCCAAGGCGGCCAATTTCTTGC GCGGTTACATA
TCCC GCTGCAATGCTCCACCCATCCGCTCTCTCTGACCTTCGGTTCCCAACACAACGGCATTTCTGCCTTCCAAGCCTGTGGTCCGCGATT
TCTCTGTGCGGGTGTCAAACCCCTTTGCGATCCAACACCTGGTCAACCTTTGTCCAATCTCGTCTCGTACCCGCTCAATACTTCAGAGATCC
```

GGAAAACCTAGACTCTTACCTTGAATATTTCCAATTTCCCTTGCCGACATCAATAATGAGCGCTTCTCAAGAACCAAACATATAAAATCCAACATG  
GAAAAATTGGAACGATTTCGTAATGTATGTCTTTGAAAGACGATACAACTGTCATCCCTAAGGAAAAGTGGATGGTGGGCTGAAGTCAACGGCACGG  
AAGTTACACCACTGAAAGAAAAGAGCCATTTATAAAAGAAAGATTGGCTAGGTTTAAAGACATTTGGATGAGGCCGGAAAATTAGTTTTTCGAAACCAT  
TCCAGGGGGACATATGACGTTAGGAGAGGAGATGCTAGAGAAAGGCTTTCAAAGAGTATTTTGGTCCAGCAGGGAAGAAAATTTGGG

>Bcin16g03460 (MLST7), partial sequence [organism=Botrytis cinerea, strain D11\_T\_B14]  
ATGAACCTCTTAATTTGAACTCTTCATTATTTGCAAGTGTGAAACCCCTATTCTGCCAGAGGATAGTTACAAGACGTATATCATTTAGTCGAGA  
ACCCTCATGATATATATTGACGGATTTTTGAAAAGCGAATGAAAGTAAACATTTGGTTGATGTTAGGTGTGTTATTTATTTCTGATGAAATGAAC  
AAGAGAGACTGATGAGATAGTGAGCCGCTTTATGAACCGTCAACTGTTTCTCACGGACAGGAAGTTACCATTGATCCTTCAGTTCGGAATTCCTG  
AAGTGGCGGTTTTAGAGAGGGATGAGGTGGTCAGGTGTATTGAGCATAGAGCGAGGGCATTTCAGGGGTGGAGGGGCGAGATGGGGATTGAGAA  
GTTGAGGACCGCAGAGGTATGGGGTTGGAGGACATTATGGGATGCATTTGTAAGTTTTGGGGGATTGACGAAGGCTTTTGTCTATTTTCTACCAG  
TACGGATCTTGAAAAGAAAAGATAGCATGAACACGAGGGCTAATAACTAGGAAATAGCGATTGGAGCGGAGGTAAACGTGGCATAGACCGATTTAG  
TACTTTTATGGTCTATGTCGACGTATCCTCTGATATCGAAGGTGGAGAACGGAATTTCCACGTATCGTGGGACAAAAGGAGGAAGGTGGGAG  
GACTTCTTGAAAACCTACGGAAGCATTTGGATCCAAGAACTGGAGAAAATGTAACAGTAGAAGGGGTGACATTCAAACCAATCAAGGGAAATGCC  
TATTCTGGGAAAATACTGACAGCAACGGGAGGGGCTATGATG

>Bcin12g03020 (MLST8), partial sequence [organism=Botrytis cinerea, strain D11\_T\_B14]  
CGATTGGCTGCGAAGAAAACCTGCGCAGCACCGAGTCACCAAAAAGCACGAATAAACCATCGGCAAGGAAAATATCTCTGAACCACAACATGACA  
CGAGCGCGGAAGAGTATATCGGGCGAGAAGCTTCATCAAGAGCACCAAAAGCGACAACGAGTCGATGATAATTATAACTCTTACGGTGAAGAAA  
TGAAAATACAGCAGCTTATACTTCCGGGAAACTTCCATCTGGAAGTATAAATGTTGGTGGAGGTAGGAAGACCCTTTTCAAGAAGAACCACGA  
ACGGCATTGTGCTGGCAAGTTGCCCTTGGAAAGTATCAACATTTGGTGGAAAGAAAGGCTACCCAAATCGAGGACGAGGGTAGAGCAGCTTATG  
CTTCCGAAAATTTGCCCTCCAGGAAGTATAAACTCTGGCGCAAAGAAAGGCGATTTCAATCCAAGATGAAACGAGACCGGCTTATGCTCCGAAA  
GCTTCCACATGGTAGTATCGACGGTATGCGAAAACCGTGAATGGCTGCCCTCCACCGCGAAATGCTGAGGGTGGGAGGAAACCAGGCCAGGTT  
GTCTCTTCTTATTACATTCATCTTCAAAGAAAACCTTTGATGAACCCGAAGAACAAGCGGAACCGGCAAAACCATCCAATGCGCCTT  
TGACAGAGGAAAATGGCGACTTTACCAATCTAGGGTTATCGAGAAGGCTTGACAGCCATCTATCGACTAAACTCGATATGAAAGCTCCGACCGC  
CATTCAAAAAGCATCTGTACAGCAGTTGGTATCGGACGATAGCGATGCTTTCATACAAGCAGAGACTGGATCTGGA AAAACTTTGGCATATCTA  
CTACCTATAGTCGAGCGAATATTAGCATTGAGTGAGAATGGCGTACAAA

>Bcin02g07770 (MLST9), partial sequence [organism=Botrytis cinerea, strain D11\_T\_B14]  
CAGCTTTCCCTTTTCGGTCTTGGCATCTACAGTCATTGCCATCCCTACACCATCACAACTTGAGTCTCGGGCCGTTATCGATTCCGATGCCGTTG  
TAGGATTTGCCGAAACTGTTCCAGTGGGACCGTAGGAACAGTTTATGAGGCATATAAACCATTCCTTAAAGTCGTAAATGGATGCGTACCATT  
CCCTGCCGTCGATGCATCGGGTAACACAGGGTATGTCTTATATCTTTCTCTTCCACACGATTGCTATTGAGTCTCTAACATATTTTAGTGGTG  
GTTTGTACCAACTGGCAGTAGCAATGGTGGTTGACGACGAGTACCGGTCAAGTATATGTTTCGAGGAGGACAAAGCGGATCAAACCTACGCCAT  
CATGTACTCTTGTAAGTTCTCTCTAAACTTCTCCTTATAGATCCAACCTAACAAAATCTTAGGTACATGCCAAAGGACGAGCCCTCAACCGGT  
ATTGGTCAACGTCACGATTGGGAAGGTGTAATTTGCTGGCTCTCCAGCGCCACCGCCACAACCTGCCGACAACATCTTAGCCGTTTGTCTTCCG  
CCCACGGAGGCTGGGATTGTTCCACGGATGGCTATTTCCCTTTCTGGTACCAGCCCTCTTATCAAGTACGAAAAGTATCTGGCCCGTCGATCACTC  
AATGGGTCTTACTAGTACTGTTGGTGGAAAACAACCTATGATTGCTTGGGAGTCTTTACCAACTGCTGCTCAAACCTGCTCTTGAGAACACCGAT  
TTCGGTGTGCGAATGTTCCATTCAATTCGGCTGTTTTACAGACAATCT

>Bcin04g02090 (MLST10), partial sequence [organism=Botrytis cinerea, strain D11\_T\_B14]  
CGGAGGATGATATGGCAAAGTCTATGATTACCAAAGCATTTGTAGGCATGAGTAGTAAACTGTCGAATATGACTATGAATGATGTTTACAAGCC  
CTACATCCATGTAAGAAAATGTAGAATAGAGAGATCAGTAACTGGAATAATATCGTTTGTAGGCTTTCAAGTTACTTACGCAGTTCAACCCAAT  
CACTACAGCTATTGCCGAATCCCCTACTGTTTCAAATGGCCGCTCTCAGCAAATACCATCGAAAAGTACACACTGCTAGGCCCTTTCTTTCAGAATA  
TCTCCTCTGCAACAGGAAGTTACCAGGGAATACTTCAAGTGCGCCAAAAGACGATAGATAGGCGACACATTTGCCACATCTCAAGATGCGTTACGAT  
TGACCTTACAAAACCATCAAAAAGATTTACTTGTATATCATCAACCCTTTGTTTCGAGCAAGTCCAATCGAAAAAGCAAAAACCCCTGGATTGGTT  
CGCTACATTGTGAATCAAAAATCAAAAGCGTCGAGCACTTCAGGTAGACCCGAAAGAAAGTGTCTTCTGATGGCTTTATGCACAATGTCACGTGTC  
GTTCTAGATGGTCTTTGTGAGCCATTCAATGGATACCACATTTCTCGAAAATTTTCGAAGATTGATATTGATTATCTAAGACGTGCGCCTCGTGTAG  
ATATCAAGGACGAGACCAAGTTGAACGCTGACGAGAAGGCTTCTGAGAAGTATTTAGAGGACACTGTTTCCCTGGCATTCTAATTTTCACTCTGTA  
GGTCTTCTTTCTCACATTTGGCTGCTCATATTATGGTAGTGAAGCTTTAATGCCACGCATAAGAGTCTGGAGAAAAGACATCAAATATATTTCAA  
AAGCAATTGACTGCCGTTGAAGCAG

>Bcin01g07220 (MLST1), partial sequence [organism=Botrytis cinerea, strain D11\_T\_B25]  
ATGGCATATCTTGTCTTTTTCGCATCATGCTTTGGAACGTGCTGGCAAGCTTGGGTTAGTGCTCTGCGTGTAGAAGCACTAAAGAAGATTCT  
CGACAACCGAAGTCATGGTTTTGAGGAATCCAGGAATTCACCTAGCCGGTTGAACGAAAGTTTTGGATAGAACCTTGAGGAAATGCGTAATCTCGT  
TGGCCGCTTTGCTGGTATTGTATTACAGCATTTTTATGCTATTGATATCAATCATTTGGCTTTTCGTGAATACATGGAACCTGACATTAGTCTC  
AATGGCAACTGGCCAGTTATATACGCTGTCACCAAACGTTCAATCGCGTGAGTGGAAAATGGAAAACAAGTGCAACTACGCATCTGAAATGACCA  
TGGCATATTTAGAGACTTTCTCCAACATCAAAGTGTTCGGGCTTTTACTCTGGAACTTACTTTGAGACAAAACACACCAAAGCTACAGAAGA



```
ACTCTATAAAGTTGGCTAATACGAGCAAACACTACTCGGATTGCTGTGGGATTGACAGATGCGATGTCATCTTCATCACTGCACATCTTATATTA
TGCCACGTTCTCATTACCAAGAGAGATCAGTATTGCGACTGCACTACAGACTGTCAATCTTCTATTATTTGTATTTCTAATAGTACGAATATGC
TGGCTATGATAACCACAAATCAACTCTTCTCGCGTACAGCTACGCATATGCTTGCATTAGCCAATCTCGATTTCATCTTCTCCACGAAAATAAAG
GAACCGAACGGCTTCGACAATCTTTCCAATCAAAATCAACCGTCTTTCATCACATAACCTACTCGTCTGAAAACGAACGATATCATCCTTTTCT
CTTCTCTGATTCCCTAACTCAACAACACTGCACTTGTTCGGACCTCGGCTCCGAAATCTACGATAGCTGCTCTGCTCATTTGCTCTATCCGCAGATA
CTTCAACACCTCCACCGTTGACATTCAATCGCGTCTCCATAAGTAACTGTCACATTCGGTCTCTCCGGCTTCTCTCTCACTCGTCCACAAATAC
CGATTCTATTTCCAGCTACCATTCTCCATAACATCATTTATGGTCTCCAGAAATCTTCTCCTTGTGCTAGTCTTCATCTGCTATTGCATCGCAA
AGATGCTGGGATCATGAATTATCACATCGCTTCCACAAGGTTATGATACTAT
```

```
>Bcin05g07690 (MLST2), partial sequence [organism=Botrytis cinerea, strain D11_T_B25]
CACCCTATACACCAAGTCTTTTCTGCACTTTCTCATCAAAAAACGAAACGAGAACATCATCAATAAAATACCTTTGCTGAAGTAATTGGGTTTTAT
TTTGGCCAGGATGCCTTCTCTCTACGACAGCAAGCCTTCGATGATATGTTGTGGGTAGTTCTTGGCTGGCTGGATACTGTCAAATTCATTGATT
TACATTCTGAATTGCACTATTCAAACGACTCTCAGCCAGAATGGTACGGACAACAATATAAGCCTGCATTTGCACATCGAGCGGACTATTTTG
GGAATTGGCTTACAAGGATGGGATACTACTCTCTGTGGTGGTGGGATGATATGGTACCATAACCTTACTCCATAACAAGAATGCAATTACCAAT
GAACTCTATATCGCAGCTTCGATATCGATGTACCTCTATTTCCCGGAGATGACAATCAATCCCCATTTATGCTTTCCAACCTTCATATCCAC
CTCACGATCCGAAATATCTACAGGCAGCTGTTGATGCTTACAAATGGCTGAATGGTTCCAACATGACGGATTTACAAGGATTATATGTCGACGG
GTATCATATCTCGAATCTTTCTGGCGGTGAAAACACCCATTGCGATTTAGAAAAGAGATGGTATATACCTACAATCAAGGTGTTTTGCTTACT
GGACAACGTGGTTTTGTATGACGCAACCGCCGACGATCATACTTGTGGATGGCCACAAACTCATCGCGAATGTTATTAATGCCACAGGCTATG
ACCTGAAAACACAATGTTGTCATCTCACCGCCACCCAAAGATGGTTCCGCATTTGGCAAAGTGGTTTTGGCCTGGGTAGGAATGGAATACTGGAAGA
AGGATGCGATTCAAGTGTCTCGTGTCTCAAAATGGACAACTTTCAAAGGCATATTTCTTTCATCACTTGATTGCATTCTGTAGTATTGCCA
GGGAGCCTATTGCAGGGACGAAAAGAAGCCTAGAACTCGACAGAGTGTGGCATTCTGACAAATGCTCACAGTATAACAAAT
```

```
>Bcin06g01710 (MLST3), partial sequence [organism=Botrytis cinerea, strain D11_T_B25]
GTGAGTCTGACTTTTGTATTTGAGCGTTAAGATGGACACTGATGTACCAAGGCAATCACCTAATTTTCATGGCGTTCTTCCCTGCATCATCTACC
TACCCTGGAATGCTGGGAGAATTATACTCAGCAGCTTTACAGCTCCTGCTTTCAATTGGATCTGTTCCCTGCTGTGACAGAATTGGAGACGG
TTGTAATGGATTGGTTGGCCAAGCTTCTCAATCTCCAGACTGTTATTTGTCGTCGACTCATGGTGGTGGTGTATCCAAGGATCAGCCTCGGA
AGCTATCGTTACCGTTATGGTTGCTGCCCGGATAAGTATCTTCGTGAAACCACTGAAGTCTGTGCGGAATTGAACTCGAGGATGCGATTGCA
TATAAGAGGAGTAAGCTAGTTGCACTAGGAAGCGAAATGGCACACAGCTCCACGCAGAAAGCAGCGCAGATAGCTGGCGTTAGATTCCGATCGA
TTCCAGTACTCGCATCCAATGATTTGCGCATGACGGGTGATGATTTAGAGAAGGTATTGAAAGAATGCAAATCTCAAGGATGGAACCTTCTA
TCTAACTTCGACGTTGGGAACAACATCTACATGCGCAGTTGACGACTTCGCATCTATTGCAACAGTACTTTCAAAATATGCACCTCCAGATGTT
GCAGGCGAGATCTGGGTTACGTCGATGCTGCTTATGCAGGTGCAGCTTTGGTTTTGCCCTGAATACCATCATCTAACATCGTCTTCCAGCATT
TCCATTCTTTGATATGAACATGCACAAATGGCTTCTGACAAATTTGACGCTTCTTGCCATATATGTCAAGAAACGCAAAGATCTGATCGATGC
ACTCTCCATAACACCAAGTTATCTTCGCAACGAGTTTTTCAGAGAGTAGACTCGTAACCGACTATCGGGACTGGCAAATTCCTCTCGGAAGACGT
TTCCGAAGCTTAAAGATTTGGTTTTGTCTCAGAACCCTAC
```

```
>Bcin09g03030 (MLST4), partial sequence [organism=Botrytis cinerea, strain D11_T_B25]
GACCCTTCAACCCACCGCAGCTCCTATACCGAAAGCGAGTATCCTACCAATTTCTCCTTCCACCTGCGACTTTAAGACCATTGGCTTTTTCGCAC
TTTACAAAAAGCATAGTTTAAACATTGACGTCGTCGGCATTACAAGTGTGGCTACTTTTATTGGAAAGCATTGTGGGACAGGATGGAGGGAG
GAAGGACTGGCAGAGAGAGTCTTGGAGGAGGTGCGCAAGAGTTGGAAGAAATAGGAGTGGCGGTGTCATTGTGCGAGGGCGAGGAAACGGAATTGA
AGGAGATTCTGAAAAGCTTTGGAAGGGAATATGAGTGGTGGAAAGGATAGTCATAGGAAGAGAGCTAAGCCGGCAGAAATAGTTTGTAGTACTGGGATC
ATCACAATATGGAGAGGTCAATCATACAAGACTTGGGCTACGGCCAGGGAATATACCCAGAGAGGATAGTCAAGTTTGGGAATGTCAACG
TTGGAGGTCAATGACGAGGAAGATGAGGATGGCTGATGGATCCAAGAAGGTGGTTAAAAGTCTGTGATGCATTTGAGCAACCTCGACTGGTGT
ACAATGTTGCTAAAAAGCACTTTGATAGGTATGTTTCAATGATAAAATTTTATCTGAATCGACTAACTCAGTACAGAGATACCTCCAAACCTTC
ATTGTTCCACCTGCGTCTCATAAAAAACTCCTCTTCCAAAACCCTATAATGTTATCCATCAACGTCTCCTTCGCAATGAATCTTTTCAAACG
CCCGCTTTTCAAGGTGGCAAATCTTCCCTTCAACGCAGCAGTCCGCCATTACCACCCAACAACAATCATACAAATTAACGCCGATAGCTAATC
TTCTCGGTGCAATCGCAGCTCTCATATGCTTCTCGGTCTCCTCAGTATTTACCCACTGGTACCCTCGCCATCAATGACCTGACGGGCAGTAT
CGCTCTTGATCTTACACACGCAGCAGCCATTC
```

```
>Bcin11g01310 (MLST5), partial sequence [organism=Botrytis cinerea, strain D11_T_B25]
ACTGACATGGACCTCATGTGGAACCGGCTAGAATGCGCAACGCTTGAAGTTCCGCTCGAATATGGCGATGCAACGTCAACGGCAAAGCCAGT
GTTGCGCTTGCTCGTTATCCTGCCACTGTTGCCGCGAGCAAGAAGCTCGGGTCTCTCTTGATAAAATCCCGGTGGACCCGGTGCCTCTGGTGTG
GCTTTGTGCACTCTGGAGCCGGTGCCCGCTCTCGACACTGAGTGGTGGATTATACGATATCATCGGATGGGATCCACGTGGAACCGGTGCTTC
GGCTCCTATTTTGAATGTTTTGCAAATGCCAGTGGGAGTATGATTTTAAACAACGCTTTCCATCTGCTCCGAATCTCTGGCTCGGACAATTT
GCGAATGCCAGCGCAAATTTGCTGTTAGTCTGCTATCACATCCTTTGACACTTCTGTGCTGCTCTTGGAAAAGCTTGGCTGGCTCAGAAAT
CTCCCGCTCTTTACACCTCAACAGCAGCATATGTTGCTCGAGACATGGCAGCGATAGTCGATGCATTGGATGGGACCTCTGCAAACCTTAACTA
CTGGGGTTTCTCATATGGAATATCTTCCCTAGCTGAGTTTATCCAACTTTCCAGGCCGCTGGGAAGAGTTCTTGCCGATGGTGTTCGCAC
GCAAAGGCAAATGCACTCACATACGTTAGCCAATTTCCAACGATCAACTCAGTGTTCGTGCTTCTGTTGAACGATTTTGCAGCTTTCTGCACCA
```

CCGCCGGTAGTAAAGGTTGCTCTTTTGCCACCGCCCTACTGGAACCTCAGGTACTGTTGCTACCAGACTGGACAACATAATGAAGGATATGTT  
CCTCAATCCTATTGTTGCTTCGGGCTTGAGCATCA

>Bcin15g03910 (MLST6), partial sequence [organism=Botrytis cinerea, strain D11\_T\_B25]  
GCCAAAACACAAAATCATCCAACGATGAAGATGATACTCCACTTCCCTTGATTATCTGGCATGGACTCGGCGATAATTACAAAGCGGATGGTCT  
TGCGCAAGTTGAAAACTAGCTGAAGCTATTCATCTGGGACTTTTGTCTATAAATTCATGTAGATGAGGATGCATCTGCAGATAGGACAGCT  
ACCTTCTTTGGAAAATCTCACTCGTGAGTACATCCCTATTTTTCTTTAAATACCATACTAACTCTCTTACCAAGTTCAAAATCGAAAAGGTCTG  
CGAAGACCTCGCCTCCCATCCTATTCTCTCTACCAGCGCCCGCGTGCAGCAATTGGATTCTCCCAAGGCGGCCAATTCTTGCAGCGTTACATA  
TCCCCTGCAATGCTCCACCCATCCGCTCTCTCTGACCTTCGGTTCCCAACACAACGGCATTCTGCCTTCCAAGCCTGTGGTCCCTGCCGATT  
TCCTCTGTGCGGGTGTCAAACCTTTTGCAGTCCAACACCTGGTCAACCTTTGTCCAATCTCGTCTCGTACCTGCTCAATACTTCAGAGATCC  
GGAAAACCTAGACTCTTACCTTGAATATTTCCAATTTCTTGGCCGACATCAATAATGAGCGCGTTCTCAAGAACCAAACATATAAAATCCAACATG  
GAAAATTGGAACGATTCTGTAATGTATGTCTTTGAAGACGATACAACCTGCTGTCCTAAGGAAAGTGGATGGTGGGCTGAAGTCAATGGCAGCGGA  
AGTTACACCACTGAAAGAAAAGACCATTATAAAGAAGATTGGCTAGGGTTAAAGACATTGGATGAGGCCGAAAATTAGTTTTCGAAACCATT  
CCAGGGGGACATATGACGTTAGGAGAGGAGATGCTAGAGAAGGCTTTCAAAAGAGTACTTTGGTCCAGCAGGGAAAAAATTTGGGG

>Bcin16g03460 (MLST7), partial sequence [organism=Botrytis cinerea, strain D11\_T\_B25]  
CATGAACCTCTTAATTTGAACTCTTCATTAATGCAAGTGATGAACCCCTATTCTGCCAGAGGATAGTTACAAGACGTATATCATTAGTTCGAG  
AACCCTCATGATATACATTGACGGATTTTTGAAAAGCGAATGAAAGTAAACACTTGGTTGATGTTAGGTGTGTTATTTATTTCTGATGAAATGAA  
CAAGAGAGACTGATGAGATAGTGAACCGCTTTATGAACCGTCTACTGTTTCTCACGGACAGGAAGTTACCATTGATCCTTCGGTTCGAAAATCT  
GAAGTGGCGATTTTAGAGAGGGATGAGGTGGTCAAGTGTATTGAGCATAGAGCGAGGGCATTTCAGGGGTGGAGGGGCGAGATGGGGATTGAGA  
AGTTGAGGACGCAGAGGTATGGGGTTGGAGGACATTATGGGATGCATTTGTAAGTTTTGGGGGATTGACGAAGGCTTCTGTCTATTTTCTATCA  
GTGCGGATCTTGAAGAAAAGATAGCATGAACACGAGGGCTAATAACTAGGAAATAGCGATTGGAGCGGAGGTAAACGTGGCATAGACCGATTTA  
GTACTTTCATGGTCTATGTGACGATCCTCTGATATCGAAGGTGGAGGAACGGAATTTCCACGTATTGTGGGACAAAAGGAGGAAGGTGGGA  
GGACTTCTTGAAAACACGGAAGCATTGGATCCAAGAACTGGAGAAAATGTAACAGTAGAAGGGGTGACATTCAAACCAATCAAGGGAAATGCC  
GTATTCTGGGAAAATACTGACAACAACGGGAGGGGCTATGAT

>Bcin12g03020 (MLST8), partial sequence [organism=Botrytis cinerea, strain D11\_T\_B25]  
CGATTGGCTGCGAAGAAAAGTGCAGCACCAGTACACAAAAGCAGAAATAAACCATCGGCAAGGGAAATATTCTCTGAACCACAACATGACA  
CGAGCGCGGAAGAGTATATCGGGTGGAAAGCTTCATCAAGAGCACCAAAGCGACAACGAGTCGATGATAAATTATAACTCTTACGGTGGAAAGAAA  
TGAGAATACAGCAGCTTATGCTTCCGGGAAAAGTCCATCTGGAAGTATAAATGTTGGTGGAGGTAGGAAGACCCTTTCAAGAAGAACCCTCGAA  
CGGCATTTGTGCTGGCAAGTTGCCCCCTGGAAGTATCAACATTTGGTGGAAAGAAGGCTACCCAAATCGAGGACGAGGTAGAGCAGCTTATGC  
TTCCGAAAATTTGCCCCAGGAAGTATAAACTCTGGCGCAAAGAAGGCGATTTCTGTTCCAAGATGAAACGAGACCGGCTTATGTCTCTGGAAGC  
TTCCACATGGTAGTATCGACGGTATGCGAAAACCGTGAATGGCTGCCGTCCACCAGGAAAATGCTGAGGGTGGGAGGAAAACCAGGCCAGGTTG  
TCTCTTCTCTATTACATTCATCCTACTTCAAAGAAAAGTTCGATGAACCCGAAGAACAAGCGAACCAGGAAAACCATCCAATGCACCTTT  
GACAGAGGAAATGGCGACTTTCACCAATCTAGGGTTATCGAGAAGGCTTGCAGCCATCTATCGACTAAACTCGATATGAAAGCCCCGACCGCC  
ATTCAAAAGCATCTGTGCAGCAGTTGGTATCGGACGATAGCGATGCTTTCATACAAGCAGAGACTGGATCTGGAAAAGTTCGAGGATATCTAC  
TACCTACAGTCGAGCGAATATTAGCATTGAGTGAGAAATGGCGTACAAA

>Bcin02g07770 (MLST9), partial sequence [organism=Botrytis cinerea, strain D11\_T\_B25]  
CAGCTTTCCCTTTTCGGTCTTGGCATCTACAGTCAATGCCATCCCTACACCATCACAACTTGAGTCTCGGGCCGTTATCGATTCCGATGCCGTTG  
TAGGATTTGCCGAAAAGTGTCCAGTGGGACCGTAGGAACAGTTTACGAGGCATATAAACCATTCCTTAAAGTCGTAAATGGATGCGTACCATT  
CCCTGCCGTCGATGCATCGGGTAAACAGGGTATGTCTTATACCATTTCTTCCACACGATTGCTATTGAGTCTTAACATATTTTAGTGGTG  
GTTTGTACCAACTGGCAGTAGCAATGGTGGTTGCAGCAGCAGTACCGGTCAAGTATATGTTTCGAGGAGGACAAAGCGGATCAAACACGCCAT  
CATGTAATCCTGGTAAAGTTCTCTCTAAAAGTCTCTCTTATAGATCCAACCTAACAAAATCTTAGGTACATGCCAAAGGACGAGCCCTCAACCGGT  
ATTGGTCAACGTCACGATTGGGAAGGTGTAATTTGTCTGGCTCTCAAGCGCCACCAGCCACAACCTGCCGACAACATCTTAGCCGTTTGTCTTCCG  
CCCACGGAGGCTGGGATTGTTCCACCGATGGCTATTCCTTTCTGGTACCAGCCCTTATCAAGTACGAAAGTATCTGGCCCGTCGATCATTC  
AATGGGTCTTACTAGTACTGTTGGTGGAAAACAACCTATGATTGCTTGGGAGTCTTACCAACTGCTGCTCAAACCTGCTCTTGAGAACACCGAT  
TTCGGTGTGCGAATGTTCCATTCAATTCGGCTGTTTTTCACAGATAATCT

>Bcin04g02090 (MLST10), partial sequence [organism=Botrytis cinerea, strain D11\_T\_B25]  
GCGGAGGATGATATGGCAAAGTCTATGATTACCAAAGCATTTGTAGGCATGAGTAGTAAACTGTGCAATATGACTATGAATGATGTTTACAAGC  
CCTACATCCATGTAAGAAATGTAGAATAGAGAGATCAGTAACTGGAACATAATATCGTTTGTAGGCTTTCAAGTTACTTACGCAGTTCAACCCAA  
TCACTACAGCTATTGCCGAATCCCCTATTTCAAATGGCTGTCTCAGCAAATACCATCGAAAAGTACACACTGCTAGGCCCTTTCTTTCAGAAT  
ATCTCTCTGCAACAGGAAGTTACCAGGGAATACTTCAGTGCGCCAAAAGACGATAGATAGACGACACATTGCCACATCTCAAGATGCGTTACGA  
TTAACTTACAAAACCCATCAAAAAGATTTACTTGGATATCATCAACCACTTTGTTTCGAGCAAGTCCAATCGCAAAAAGCAAACCCCTGGATTGGT  
TCGCCTACATTGTGAATCAAAAACGTCGAGCACTTCAGGTAGACCCGAAAGAAGTGTCTTCTGATGGCTTTATGCACAATGTCACGTG  
CGTCTAGATGGTCTTTGTGAGCCATTCAATGGATACCACATTTCTGAAAATTTCAAGATTGATATTGATTATCTAAGACGTGCGCCTCGTGTGTA

GATATCAAGGACGAGACCAAGTTGAACGCTGATGAGAAGGCTTCTGAGAAGTATTATGAGGACACTGTTCCCTGGCACTTCTAATTTTCATCTCTG  
AGGTCTTCTTTCTGACATTGGCTGCTCATATTATGGTAGTGAAGCTCTTAATGCCACGCATAAGAGTCTGGAGAAAGACATCAAATATATTCA  
AAAGCAATTGACTGCCGTTGAAGCAGAAC

>Bcin01g07220 (MLST1), partial sequence [organism=Botrytis cinerea, strain D11\_T\_B45]  
ATGGCATATCTTGTCTTTTCGCATTATGCTTTGGAACGTGCTGGACAAGCTTGGGTAGTGTCTGCGTGTAGAAGCACTAAAGAAGATTCT  
CGCACAAACCGAAGTCATGGTTTGGAGAAATCCAGGAATTCACCTAGCCGGTTGAAACGAAAGTTTGGATAGGAACCTGAGGAAATGCGTAATCTC  
GTTGGCCGCTTTGCTGGTATTGTATTACACGATTTTTTATGCTATTGATATCAATCATTTGGGCTTTCTGTAATACATGGAACCTGACATTAG  
TCTCGATGGCAACTGGGCCAGTTATATACGCTGTCACCAAAACGTTCAATCGCGTGAGTGGAAAATGGGAAAACAAGTGCAACTACGCCCTCTGA  
AATGACCACTGGCATATTTTCAGAGACGTTCTCCAACATCAAAGTGGTTTCGGGCTTTTACTCTGGAACTTACTTTGAGACAAAACACACCAAA  
GCTACAGAAGAACTTTATAAAGTTGGACTAATACGAGCAAACTACTCGGGATTGCTGTGGGGATTGACAGATGCGATGTCATTTCTCATCACTG  
CAACTATCTTTTATTATGCCACGGTCTCATTACCAAGAGAGAGATCAGTATCGCGACTGCCTACAGACTGTCAATCTTCTATTATTTGGTAT  
TTCTAATAGTACGAATATGCTGGCCATGATACCACAAAATCAACTCTTCTGCGTTACAGCTACGCATATGCTTGCATTAGCCAATCTCGATTCA  
TCTTCTCCCACGAAAATAAAGGAACGAACGGCTTTTCGACAATCTTTCCAATCAAATTC AACCGTCTTTTCATTACATAACCTACTCGTCTCTGA  
AAAACGAACGATATCATCTTTTCTCTTTCCCTGATTCCTAACTCAACAACCTGCCTTGTTCGGACCTCCGGCTCCGGAAAATCTACAATAGCT  
GCTCTGCTCATTGGTCTCTATCCGCCAGTACTTCAACACCTCCACCGTTGACATTCAATCGCGTCTCCATAAGTAACGTGCACATTCGGTCTC  
TCCGGGCTTCTCTCACTCGTTCACAAAATACCGATTCTATTTCCAGCTACCAATCTCCATAACATCATTTATGGTCTCCAGAATCTTCTCC  
TTGTGCTAGTCTTCCATCTGCTATTGCATCAGCAAAAAGATGCTGGGATCCATGAATTTATCACATCGCTTCCACAAGGTTATGATACTAT

>Bcin05g07690 (MLST2), partial sequence [organism=Botrytis cinerea, strain D11\_T\_B45]  
ACCACTATACCAAGTCTTTTCTGCACTTTCTCATCAAAAACGAACGAGAACATCATCAATAAATACTTTGCTGAAGTAATGGGTTTTATT  
TTGGCCAGGATGCCCTTCTCTTACGACAGCAAGCCTTCGATGATATGTTGTGGGTAGTCTTGGCTGGCTGGATACTGTCAAATTCATTGATTT  
ACATTCTGAATTGCACTATTCAAACGACTCTCAGCCAGAATGGTACGGACAACAATATAAACCTGCATTTGCACATCGAGCGCGACTATTTTGG  
GAATTGGCTTACAAGGATGGGATACTACTCTCTGTGGTGGTGGGATGATATGGTACCATACCTTACTCCATACAAGAACGCAATTACCAATG  
AACTCTATATCGCAGCTTCGATATCGATGTACCTATATTTCCCGGAGATGACAATCAATCCCATTTATGCTTTCCAGCCCTTCGTATCCACC  
TCACGATCCGAAATATCTACAGGCAGCTGTTGATGCTTACAAATGGCTGAATGGTTCCAACATGACGGATTTACAAGGATTATATGTCGACGGG  
TACCATATCTCGAATCTTTCTGGCGGTGAAAACACCCATTCGATTTCTAGAAATGAGATGGTATATACCTACAATCAAGGTGTTTTGCTTACTG  
GACAACGTGGTTTGTATGACGCAACC GCCGACGATCATACCTTGTAGATGGCCACAACTCATCGGAATGTTATTAATGCCACAGGCTATGA  
CCTGAAAACACAATGTTGTCTATCTACCGCCACCCAAAAGATGGTTCCGCATTGGCAAAGTGGTTTGGCCGGGTAGGAATGGAATACCTGGAAGAA  
GGATGCGATTCAAGTGTCTCGTGTCTCAAAAATGGACAAACTTTCAAAGGCATATTTCTTTCATCACTTGATTGCGTCTGTAGTGATTTGCCAG  
GGGAGCCTATTGCAGGGACGAAGGAAAGCTTAGAACTCGACAGAGTGTGGCATTCTGACAAAATGCTCACAGTATACAAAAT

>Bcin06g01710 (MLST3), partial sequence [organism=Botrytis cinerea, strain D11\_T\_B45]  
GTGAGTCTGACTTTTGTATTTGAGCGTTAAGATAGACACTGATATACCAAGGCAATCACCTAATTTTCATGGCGTCTTCCCTGCATCATCTACC  
TACCCTGGAATGCTGGGAGAATTATACTCAGCAGCTTTCACAGCACCTGCTTTCAATTGGATCTGTTCCCTGCTGTGACAGAATGGAGACGG  
TTGTAATGGATTGGCTGGCCAAGCTTCTCAATCTCCAGACTGTTATTTGTCTTCGACTCATGGTGGTGGTGTATCCAAGGATCAGCCTCGGA  
AGCTATCGTTACCGTTATGGTTGCTGCCCGGATAAAATATCTTCGTGAACTACTGAAGGTCTGTCCGGCATTTAGCTCGAGGATGCGATTGCA  
TATAAGAGGAGTAAGCTAGTTGCACTAGGAAGCGAAATGGCACACAGCTCCACGCAGAAAGCAGCGCAAATAGCTGGCGTTAGATTCCGATCGA  
TTCCAGTACTCGCATCCGATGATTTGCCATGACGGGTGATGATTTAGAGAAGGTAATGAAAAGATGCAAATCTCAAGGATTTGGAACCTTCTA  
TCTAACTTCGACTTTGGGAACAACATCTACATGCGCAGTTGACGACTTCGCATCTATTGCAACAGTACTTTCAAATAATGCACCTCCAGATGTT  
GCAGGCGAGATCTGGGTTACGTCGATGCTGCTTATGCAGGTGCAGCTTTGGTTTGGCCCTGAATACCATCATCTAACATCGTCTTCCAGCATT  
TCCATTCTTCGATATGAACATGCACAAAATGGCTTCTGACAAAATTTGACGCTTCTTGTCTATATGTCAAGAAACGCAAAGATCTGATCGATGC  
ACTCTCCATAACACCAAGTTATCTTCGCAACGAGTTTTTCAGAGAGTGGACTCGTAACCGACTATCGGGACTGGCAAATTCCTCTCGGAAGACGC  
TTCCGAAGCTTAAAGATTTGGTTTGTCTCAGAACCCTAC

>Bcin09g03030 (MLST4), partial sequence [organism=Botrytis cinerea, strain D11\_T\_B45]  
ACCCTTCAACCCACCGCAGCTCTATACCGAAAAGCGAGTATCTTACCAATTTCTCTTCCACCTGCGACTTTAAGACCATTGGCTTTCCGCACT  
TTCACAAAAAAGCATAGTTTAAACATTGACGTCGTCGGCATTACAAGTGTGGCTACTTTTATTGGAAAGCATTTGTGGGACAGGATGGAGGGAAG  
AAGGACTGGCAGAGAGAGTCTTTGGAGGAGTCCGAAGAGTTGGAAGAATAGGAGTGGCGGTGTCATTGTGCGAGGGCGAGGGAACGGAATTGAA  
GGAGATTCTGAAAGCTTTGGAGGGAATATGAGTGGTGGAAAGGATAGTCATAGGAAGAGAGCTAAGCCGGCAGAATAGTTTAGTACTGGGATCAT  
CACAAATATGGAGAGGTCAATCATACAAGACTTTGGGCTACGGCCAGGGAATATACCCAGAGAGGATAGTCAAGTTCAGTTGGGAATGTCAACGTT  
GGAGGTCAATGACGAGGAAGATGAGGATGGCTGATGGATCCAAGAAGGTGGTTAAAAGTCAATTGATGCATTTGAGCAACCTCGACTGGTGTAC  
AATGTTGCTAAAAAGCACTTTGATAGGTATGTTTCAATGATAAAAATTTATCTGAATCGACTAACTCAGTACAGAGATACCTCAAACCTTCAT  
TGTTCCACCTGCGTCTCATAAAAACACTCTCTTCCAAAACCGCTATAATGTTATCCATCAACGTCCTTTCGCAATGAATCTTTTCAAACGCC  
CGCTTTTCAAAGGTGGCAAATCTTCCCTTCAACGCAGCAGCTCCGCCATTACCACCCAACAACAATCATACAAATTAACGCCGATAGCTAATCTT  
CTCGGTGCAATCGCAGCTCTCGTATGCTTCTCGGTCTCTCAGTATTTACCCACTGGTACCCTCGCCATCAATGACCTGACGGGCAGTATCA  
CTCTCGATCTTACACACGCAGCAGCCATTCC

>Bcin11g01310 (MLST5), partial sequence [organism=Botrytis cinerea, strain D11\_T\_B45]  
GACTGACATGGACCTCATGTGGAACCGGCGTAGAATGCGCAACGCTTGAAGTTCCGCTCGAATATGGCGATGCAACGTC AACGGCAAAGCCAG  
TGTTGCGCTTGCTCGTTATCCTGCCACTGTTGCCGCGAGCAAGAAGCTCGGGTCTCTCTTGATAAACCCCGGTGGACCCGGTGCCTCTGGTGT  
GGCTTTGTGCAGTCTGGAGCCGGTGCCGCCGTCTCGACACTGAGTGGTGGATTGTACGATATCATCGGATGGGATCCACGTGGAACCCGGTGCCT  
CGGCTCCTATTTTGAATGTTTTGCAAAATGCCAGTGCAGGATGATGATTTTAAACAACGCGTTTCCATCTGCTCCGAATCTCTGGCTCGGACAAT  
TGCGAATGCCAGCGCAAAATCTGCTGTTAGCTCTGCTATCACATCCTTTGACACTTCTGTCGCTGCTCTTGCAAAAAGCTTGCCTGGCTCAGAAA  
TCTCCCCTCTTTACACCTCAACAGCAGCATATGTTGCTCGAGACATGGCAGCGATAGTCGATGCATTGGATGGGACCTCTGCAAAACTTAACT  
ACTGGGGTTTCTCATATGGAACATTTTCTTAGCTGAGTTTATCCAACTTTCCAGGCCGTGTGGGAAGAGTTCTTGCCGATGGTGTTCG  
CGAAAGGCAAATGCACTCACATACGTTAGCCAACCTCCCAACGATCAACTCAGTGTTCGTGCTTCGTTGAACGATTTTGCAGTTTCTGCACCA  
CCGCCGGTAGTAAAAGTTGCTCTTTTGCACCCGCCCTACTGGAACCTCAGGTAAGTGTGCTACCAGACTGGACAACATAATGAAGGATATGTT  
CCTCAATCCTATTGTTGCTTCGGGCTTAAGCATCA

>Bcin15g03910 (MLST6), partial sequence [organism=Botrytis cinerea, strain D11\_T\_B45]  
CGCCAAAACACAAAATCATCCAACGATGAAGATGATACTCCACTTCCCTTGATTATCTGGCATGGACTCGGCGATAATTACAAAGCGGATGGTC  
TTGCGCAAGTTGAAAACCTAGCTGAAGCTATTCATCCTGGGACTTTTGTCTACAATATTCATGTAGATGAGGATGCATCTGCAGATAGGACAGC  
TACCTTCTTTGGAAATCTCACTCGTGAGTACATCCCTATTTTCTTTAAAATACATACTAACTCTCTTACCAAGTTCAAATCGAAAAGGTCT  
GCGAAGACCTCGCTCCCATCTATCTCTCTACCGCGCCCGCCGTCGACGCAATTTGGATTCTCCCAAGGCGGCCAATTTCTGCGTGGCTACAT  
ATCCCGCTGCAATGCTCCACCCATCCGCTCTCTCTGACCTTCGGTTCCCAACACAATGGCATTCTGCTTCCAAGCCTGTGGTCTCGCCGAT  
TTCTCTGTGCGGGTGCCTCAAACCTTTTGGGATCCAACACCTGGTCAACCTTTGTCCAATCTGCTCTGCTACCCGCTCAATACTTCAGAGATC  
CGAAAACCTAGACTCTTACCTTGAATATTTCAAATTTCTTGGCAGATCAATAATGAGCGGTTCTCAAGAACCAAACATATAAATCCAACAT  
GGAAAAATTTGGAACGATTCGTAATGTATGTCTTTGAAAGACGATACAACGTGCATCCCTAAGGAAAGTGGATGGTGGGCTGAAGTCAACGGCAGC  
GAAGTTACACCCTGAAAAGAAAGACCATTATAAAGAAAGATTGGCTAGGTTTAAAGACATTGGATGAGGCCGAAAATTAGTTTTCGAAACCA  
TTCCAGGGGGACATATGACGTTAGGAGAGGAGATGCTAGAGAAGGCTTTCAAAGAGTATTTTGGTCCAGCAGGGAAGAAATTTGGG

>Bcin16g03460 (MLST7), partial sequence [organism=Botrytis cinerea, strain D11\_T\_B45]  
ATGAACCTCTTGATTTGAACTCTTCATTAATTTGCAAGTGTGTAACCCCTATTTCTGCCAGAGGATAGTTACAAGACGTATATCATTTAGTCGAGA  
ACCCTCATGATATATATTGACGGTTTTTGGAGCGAATGAAAGTAAACATTTGGTTGATGTTAGGTGTGTTATTTATTTCTGATGAAATGAAC  
AAGAGAGACTGATGAGATAGTGAGCCGCTTTATGAACCGTCAACTGTTTCTCACGGACAGGAAGTTACCATTGATCCTTCAGTTCCGGAATTTCTG  
AAGTGGCGGTTTTAGAGAGGGATGAGGTGGTCAAGGTGATTTGAGCATAGAGCGAGGGCATTTTCAGGGGTGGAGGGGCGAGATGGGGATTGAGAA  
GTTGAGGACGCAGAGGTATGGGGTTGGAGGACATTTATGGGATGCATTTGTAAGTTTTGGGGATTGACGAAGGCTTTTGTCTATTTTCTACCAG  
TACGGATCTTGAAAAGAAAGATAGCATGAACACGAGGGCTAATAACTAGGAAAATAGCGATTGGAGCGGAGGTAACGTTGGCATAGACCGATTTAG  
TACTTTTCATGGTCTATGTGACGATATCCTCTGATATCGAAGGTGGAGGAACGGAAATTTCCACGATATCGTGGGACCAAAGGAGGAAGGTGGGAG  
GACTTCTTGAAAACCTACGGAAGCATTTGGATCCAAGAACTGGAGAAAATGTAACAGTAGAAGGGGTGACATTCAAACCAATCAAGGGAAATGCC  
TATTCTGGGAAAATACTGACAACAACGGGAGGGGCTATGAT

>Bcin12g03020 (MLST8), partial sequence [organism=Botrytis cinerea, strain D11\_T\_B45]  
CGATTGGCTGCGAAGAAAACCTGCGCAGCACCGAGTCACCAAAGCACGAATAAACCATCGGCAAGGGAAATATTTCTCTGAACCACAACATGACA  
CGAGCGCGAAGAGTATATCGGGCGAGAAGCTTCATCAAGAGCACCAAAGCGACAACGAGTGCATGATAAATTATAACTCTTACGGTGGAAAGAAA  
TGAAAATACAGCAGCTTATGCTTCCGGGAAAACCTCCATCTGGAAAGTATAAATGTTGGTGGAGGTAGGAAGACCCTTTTCAAGAAGAACCACGA  
ACGGCATTGTGCTGGCAAGTTGCCCCCTGGAAGTATCAACATTTGGTGGAAAGAAGGCTACCCAAATCGAGGACGAGGGTAGAGCAGCTTATG  
CTTCCGAAAATTTGCCCTCAGGAAGTATAAATCTGGCGCAAAGAAGGCGATTTTCATTTCAAAGATGAAACGAGACCAGGCTTATGTCTCCGAAA  
GCTTCCACATGGTAGTATCGACGGTATGCGAAAACCTGAAATGGCTGCCGTCACCCGCGAAAATTTGCTGAGGGTGGGAGGAAACCAGGCCAGGTT  
GTCTCTTCTCTATTACATTTCAATCCTACTTTCAAAGAAAACCTTTTGATGAACCCGAAAGAACAAAGCGGAACCGGCAAACCATCCAATGCGCCTT  
TGACAGAGGAAAATGGCGACTTTACCAATCTAGGGTTATCGAGAAGGCTTGACAGCCATCTATCGACTAAACTCGATATGAAAGCTCCGACCGC  
CATTCAAAAGCATCTGTACAGCAGTTGGTATCGGACGATAGCGATGCTTTCATACAAGCAGAGACTGGATCTGGAAAACCTTTGGCATATCTA  
CTACCTATAGTCGAGCGAATATTAGCATTTGAGTGAGAAATGGCGTACAAA

>Bcin02g07770 (MLST9), partial sequence [organism=Botrytis cinerea, strain D11\_T\_B45]  
CAGCTTTCCCTTTCCGCTTGGCATCTACAGTCAATGCCATCCCTACACCATCACAACTTGAGTCTCGGGCCGTTATCGATTCCGATGCCGTTG  
TAGGATTTGCCGAAAACCTGTTCCAGTGGGACCGTAGGAACAGTTTATGAGGCATATAAACCATTTCTTAAAGTCGTAAATGGATGCGTACCATT  
CCCTGCCGTCGATGCATCGGGTAACACAGGGTATGTCCCTATATCTTTCTCTTCCACACGATTGCTATTGAGTCTCTAACATATTTTAGTGGTG  
GTTTGTACCAACTGGCAGTAGCAATGGTGGTTGCAGCAGCAGTACCGGTCAAGTATATGTTTCGAGGAGGACAAAGCGGATCAAACCTACGCCAT  
CATGTACTCCTGGTAAAGTTCTCTCTAAAACCTCTCCTTATAGATCCAACCTAACAAAATCTTAGGTACATGCCAAAGGACGAGCCCTCAACCCGT  
ATTGGTCAACCGTACGATTTGGGAAGGTGTAATTTGCTGGCTCTCCAGCGCCACCGCCACAACCTGCCGACAACATCTTAGCCGTTTGTCTTCCG  
CCCACGGAGGCTGGGATTGTTCCACGGATGGCTATTTCCCTTTCTGGTACCAGCCCTCTTATCAAGTACGAAAGTATCTGGCCCGTCGATCACCTC  
AATGGGTCTTACTAGTACTGTTGGTGGAAAACAACCTATGATTGCTTGGGAGTCTTTACCAACTGCTGCTCAAACCTGCTCTTGAGAACACCGAT

TTTCGGTGTCTGCGAATGTTCCATTTCATTCCGGCTGTTTTTCACAGACAATCT

>Bcin04g02090 (MLST10), partial sequence [organism=Botrytis cinerea, strain D11\_T\_B45]

CGGAGGATGATATGGCAAAGTCTATGATTACCAAAGCATTTGTAGGCATGAGTAGTAAACTGTCTGGAATATGACTATGAATGATGTTTTACAAGCC  
CTACATCCATGTAAGAAAATGTAGAATAGAGAGATCAGTAACTGGAACATAATATCGTTTTGTAGGCTTTCAAGTTACTTACGCAGTTCAACCCAAT  
CACTACAGCTATTGCCGAATCCCCTACTGTTTCAAATGGCCGTCTCAGCAAATACCATCGAAAAGTACACACTGCTAGGCCCTTTCTTTCAGAATA  
TCTCCTCTGCAACAGGAAGTTACCAGGGAATACTTCAGTGCGCCAAAAGACGATAGATAGGCGACACATTGCCACATCTCAAGATGCGTTACGAT  
TGACCTTACAAAACCATCAAAAAAGATTTACTTGTATATCATCAACCACTTTGTTCGAGCAAGTCCAATCGAAAAAGCAAAACCCCTGGATTGGTT  
CGCCTACATTGTGAATCAAAAATCACAAGCGTCGAGCACTTCAGGTAGACCCGAAAGAAGTGTCTTCTGATGGCTTTATGCACAATGTCACCTGTC  
GTTCTAGATGGTCTTTGTGAGCCATTCATGGATACCACATTTCTCGAAAATTTTCGAAGATTGATATTGATTATCTAAGACGTGCGCCCTCGTGTAG  
ATATCAAGGACGAGACCAAGTTGAACGCTGACGAGAAAGGCTTCTGAGAAAGTATTATGAGGACACTGTTCTGGCACCTTCTAATTTTCATCTCTGA  
GGTCTTCTTTCTCACATTGGCTGCTCATCATTATGGTAGTGAAGCTCTTAATGCCACGCATAAGAGTCTGGAGAAAAGACATCAAATATATTTCAA  
AAGCAATTGACTGCCGTTGAAGCA

>Bcin01g07220 (MLST1), partial sequence [organism=Botrytis cinerea, strain D11\_T\_E12]

ATGGCATATCTTGTCTTTTCGCATTATGCTTTGGAACGTGCTGGGCAAGCTTGGGTTAGTGTCTGCGTGTAGAAGCACTAAAGAAGATTCT  
CGACAACCGAAGTCATGGTTTGGAGAAATCCAGGAATTCACCTAGCCGGTTGAACGAAGTTTTGGATAGGAACTCTGAGGAAATGCGTAATCTC  
GTTGGCCGCTTTGCTGGTATTGTATTACAGCATTFTTTATGCTATTGATATCAATCATTTGGGCTTTTCGTGAATACATGGAACCTGACATTAG  
TCTCAATGGCAACTGGGCCAGTTATATACGCTGTCAACAAAACGTTCAATCGCGTGTAGTGGAAAATGGGAAAACAAGTGAACCTACGCATCTGA  
AATGACCACTGGCATATTTTCAGAGACTTTCTCCAACATCAAAGTGGTTTCGGGCTTTTACTCTGAAAACCTACTTTGAGACAAAACACACAAA  
GCTACAGAAGAACTCTATAAAGTTGGACTAATACGAGCAAACCTACTCGGGATTGCTGTGGGGATTGACAGATGCGATGTCATTTCTTATCCTG  
CAACTATCTTTTATTATGCCACGGTTCTCATTACCAAGAGAGAGATCAGTATTGCGACTGCACTACAGACTGTCAATCTTCTATTATTTGGTAT  
TTCTAATAGTACGAATATGCTGGCTATGATACCACAAAATCAACTCTTCTCGCGTTACAGCTACGCATATGCTTGCATTAGCCAATCTCGATTCA  
TCTTCTCCACGAAAATAAAGGAACCGAACGGCTTTTCGACAATCTTTCCAATCAAATTCACCGTCTTTTCATCCACATACCCCTACTCGTCCG  
AAAAACGAACGATATCATCTTTTCTCTTTCCCTGATTCCTAACTCAACAACCTGCACCTTGTTCGGACCCCTCCGGCTCCGAAAATCTACGATAGC  
TGCTCTGCTCATTGGTCTCTATCCGCCAGATACTTCAACACCTCCACCGTTGACATTCAATCGCGTCTCCATAAGTAACTGTCACATTTCCGCT  
CTCCGGGCTTCTCTCTCACTCGTCCCACAAAATACCGATTCTATTTCCAGTACCATTCTCCATAACATCATTTATGGTCTCCAGAACTTCTCT  
CTTGTGCTAGTCTTCCATCTGCTATTGCATCAGCAAAAAGATGCTGGGATCCATGAATTTATCACATCGCTTCCACAAGGTTATGATACTAT

>Bcin05g07690 (MLST2), partial sequence [organism=Botrytis cinerea, strain D11\_T\_E12]

CACCACTATACCAAGTCCCTTTCTGCACTTTCTCATCAAAAACGAACGAGAATCATCAATAAATACTTTGCTGAAGTAATGGGTTTTAT  
TTTGGCCAGGATGCCTTCTCTACGACAGCAAGCCTTCGATGATATGTTGTGGGTAGTTCTTGGCTGGCTGGATACTGTCAAATTCATTGATT  
TACATTCTGAATTGCACTATTCAAACGACTCTCAGCCAGAAATGGTACGGACAACAATATAAACCCTGCATTTGCACATCGAGCGCGACTATTTTG  
GGAATTGGCTTACAAAAGATGGGATACTACTCTCTGTGGTGGTGGGATGATATGGTACCATACTTACTCCATAACAAGAAATGCAATTACCAAT  
GAACTCTATATCGCAGCTTCGATATCGATGTACCTCTATTTCCCGGAGATGACAATCAATCCCATTATGCTTTCCAACCTTCATATCCAC  
CTCACGATCCGAAAATCTACAGGCAGCTGTTGATGCTTACAAAATGGCTGAATGGTTCCAACATGACGGATTTACAAGGATTATATGTCGACGG  
GTATCATATCTCGAATCTTTCTGGCGGTGAAAACACCCATTGCGATTCTAGAAAATGAGATGGTATATACCTACAATCAAGGTGTTTTGCTTACT  
GGACAACGTGGTTTGTATGACGCAACCGCCGACGATCATACTTGTGGATGGCCACAACTCATCGGAATGTTATTAATGCCACAGGCTATG  
ACCTGAAAACACAATGTTGCCATCTCACCGCCACCCAAAGATGGTTCCGCATTTGGCAAAGTGGTTTGGCCCTGGGTAGGAATGGAATACGGAAGA  
AGGATGCGATTCAAGTGTCTCGTGTCTCAAAAATGGACGAACTTTCAAAGGCATATTTCTTCCACTTGATTGCGTTCTGTAGTGATTTGCCA  
GGGGAGCCTATTGCAGGGACGAAGGAAGGCCTAGAACTCGACAGAGTGTGGCATTCTGACAAATGCTCACAGTATACAAAATG

>Bcin06g01710 (MLST3), partial sequence [organism=Botrytis cinerea, strain D11\_T\_E12]

GTGAGTCTGACTTTTGTATTTGAGCGTTAAGATGGACACTGATGTACCAAGGCAATCACCTAATTTTCATGGCGTTCTTCCCTGCATCATCTACC  
TACCCTGGAATGCTGGGAGAATTATACTCAGCAGCTTTTCACAGCTCCTGCTTTCAATTGGATCTGTTCCCTGCTGTGACAGAATTTGGAGACGG  
TTGTAATGGATTGGTTGGCCAAGCTTCTCAATCTCCAGACTGTTATTTGTCGTCGACTCATGGTGGTGGTGTATCCAAGGATCAGCTCGGA  
AGCTATCGTTACCGTTATGGTTGCTGCCCGGATAAGTATCTTCGTGAAACCACTGAAGGTCGTGCGGAATTTGAACCTCGAGGATGCGATTGCA  
TATAAGAGGAGTAAGCTAGTTGCACTAGGAAGCGAAATGGCACACAGCTCCACGCGAAAAGCAGCGCAGATAGCTGGCGTTAGATTCCGATCGA  
TTCCAGTACTCGCATCCAATGATTTGCGCATGACGGGTGATGATTTAGAGAAGTATTGAAAGAATGCAAATCTCAAGGATTGGAACCTTCTA  
TCTAACTTCGACGTTGGGAACAACATCTACATGCGCAGTTGACGACTTCGCATCTATTGCAACAGTACTTTCAAATAATGCACCTCCAGATGTT  
GCAGGCGAGATCTGGGTTACGTCGATGCTGCTTATGCAGGTGCAGCTTTGGTTTGGCCCTGAATACCATCATCTAACATCGTCTTCCAGCATT  
TCCATTCTTTGATATGAACATGCACAAAATGGCTTCTGACAAAATTTGACGCTTCTTGCCTATATGTCAAGAAACGCAAAGATCTGATCGATGC  
ACTCTCCATAACACCAAGTTATCTTCGCAACGAGTTTTTCAGAGAGTAGACTCGTAACCGACTATCGGGACTGGCAAATTCCTCTCGGAAGACGT  
TTCCGAAGCTTAAAGATTTGGTTTGTCTCAGAACCTAC

>Bcin09g03030 (MLST4), partial sequence [organism=Botrytis cinerea, strain D11\_T\_E12]

ACCTTCAACCCACCGCAGCTCTATACCGAAAGCGAGTATCTACCAATTTCTCTTCCACCTGCGACTTTAAGACCATTGGCTTTTTCGCACT

TTACAAAAAAGCATAGTTTAAACATTGACGTCGTCGGCATTACAAGTGTGGCTACTTTTATTGGAAAGCATTGTGGGACAGGATGGAGGGAGG  
AAGGACTGGCAGAGAGAGTCTTGAGGAGGTCGCCAAGAGTTGGAAGAATAGGAGTGGCGGTGTCATTGTGCGAGGGCAGGGAAACGGAATTGAG  
GAGATTCTGAAAAGCTTTGGAAGGGAATATGAGTGGTGGAAAGGATAGTCATAGGAAGAGAGCTAAGCCGGCAGAATAGTTTAGTACTGGGATCAT  
CACAATATGGAGAGGTCATATACATAAGACTTTGGGCTACGGCCAGGGAATATACCCAGAGAGGATAGTCAGTCAAGTTTGGGAATGTCAACGTT  
GGAGGTCAATGACGAGGAAGATGAGGATGGCTGATGGATCCAAGAAGGTGGTTAAAAGTCTGTGATGCATTTGAGCAACCTCGACTGGTGTAC  
GATGTTGCTAAAAAGCACTTTGATAGGTATGTTTCAATGATAAAATTTTATCTGAATCGACTAACTCAGTACAGAGATACCTCCAAACCTTCAT  
TGTTCCACCTGCGTCTCATAAAAACTCCTCTTCCAAAACCCTATAATGTTATCCATCAACGTCCTCTTCGCAATGAATCTTTTCAAACGCC  
CGTTTTTCAAGGTGGCAAATCTTCCCTTCAACGCAGCACGTCGCCATTACCACCCAACAACAATCATACAAATTAACGCCGATAGCTAATCTT  
CTCGGTCGCAATCGCAGTTCTCATATGCTTCTCGGTCTCCTCAGTATTTACCCACTGGTACCCTCGCCATCAATGACCTGACGGGCAGTATCG  
CTCTTGATCTTACACACGCAGCAGCCATTC

>Bcin11g01310 (MLST5), partial sequence [organism=Botrytis cinerea, strain D11\_T\_E12]

GACTGACATGGACCTCATGTGGAACCGGCGTAGAATGCGCAACGCTTGAAGTTCGCTCGAATATGGCGATGCAACGTCAACGGCAAAGCCAG  
TGTTGCGCTTGCTCGTTATCCTGCCACTGTTGCCGCGAGCAAGAAGCTCGGGTCTCTCTTGATAAAATCCCGGTGGACCCGGTGCCTCTGGTGT  
GGCTTTGTGCAGTCTGGAGCCGGTGGCCCGTCTCGACACTGAGTGGTGGATTATACGATATCATCGGATGGGATCCACGTGGAACCGGTGCTT  
CGGCTCCTATTTTGAATGTTTTGCAAATGCCAGTGGGAGTATGATTTTAAACAACGCGTTTCCATCTGCTCCGAATCTCTGGCTCGGACAATT  
TGCGAATGCCAGCGCAAATCTGCTGTTAGCTCTGCTATCACATCCTTTGACACTTCTGTGCTGCTCTTGCAAAGCTTGGCTGGCTCAGAAA  
TCTCCCCTCTTTACACCTCAACAGCAGCATATGTTGCTCGAGACATGGCAGCGATAGTCGATGCATTTGGATGGGACCTCTGCAAACTTAACT  
ACTGGGGTTTTCTCATATGGAACATCTTCTTAGCTGAGTATTTCCAAACTTTCCAGGCGCGTGGGAAGAGTTCTTGGCGATGGTGTTTTCGA  
CGCAAAGGCAAATGCACTCACATACGTTAGCCAACTTCCCAACGATCAACTCAGTGTTCGTGCTTCGTTGAACGATTTTGCAGCTTTCTGCACC  
ACCGCCGGTAGTAAAGGTTGCTCTTTTGGCACCGCCCTACTGGAACCTCAGGTACTGTTGCTACCAGACTGGACAACATAATGAAGGATATGT  
TCCTCAATCCTATTGTTGCTTCGGGCTTGAGCATCA

>Bcin15g03910 (MLST6), partial sequence [organism=Botrytis cinerea, strain D11\_T\_E12]

CGCCAAAACACAAAATCATCCAACGATGAAGATGATACTCCACTTCCCTTGATTATCTGGCATGGACTCGGCGATAATTACAAAGCGGATGGTC  
TTGCGCAAGTTGGAAAACTAGCTGAAGCTATTCATCCTGGGACTTTTGTCTATAATATTCATGTAGATGAGGATGCATCTGCAGATAGGACAGC  
TACCTTCTTTGAAAATCTCACTCGTGAGTACATCCCCTATTTTCTTTAAATACCATACTAACTCTCTTACCAAGTTCAAATCGAAAAGGCTC  
GCGAAGACCTCGCTCCCATCTATTTCTCTTACCAGCGCCCGCGTGCAGCAAATTTGGATTTCTCCAAGGCGGCCAATTTCTTGGCGGTTACAT  
ATCCCGCTGCAATGCTCCACCCATCCGCTCTCTCTGACCTTCGGTTCCTCAACACACGCGCATTTCTGCCCTCCAAGCCTGTGGTCTGCCGAT  
TTCTCTGTGCGGGTCTCAAACCCTTTTGGCATCCAACACCTGGTCAACCTTTGTCCAATCTCGTCTCGTACCTGCTCAATACCTCAGAGATC  
CGGAAAACCTAGACTCTTACCTTGAATATTTCAAATTTCTTGGCGACATCAATAATGAGCGGTTCTCAAGAACCAAACATATAAATCCAACAT  
GGAAAAATTTGAACGATTCGTAATGTATGCTTTTGAAGACGATACAACCTGTCATCCCTAAGGAAAGTGGATGGTGGGCTGAAGTCAATGGCAGC  
GAAGTTACACCCTGAAAAGAAAGACCATTTATAAAAGAAAGATTGGCTAGGGTTAAAGACATTTGGATGAGGCGGAAAATTTAGTTTTCGAAACCA  
TTCCAGGGGGACATATGACGTTAGGAGAGGAGATGCTAGAGAAGGCTTTCAAAGAGTACTTTGGTCCAGCAGGGAAAAAATTTGGG

>Bcin16g03460 (MLST7), partial sequence [organism=Botrytis cinerea, strain D11\_T\_E12]

ATGAACCTCTTAATTTGAACTCTTCATTAATTGCAAGTGATGAACCCCTATTCTGCCAGAGGATAGTTACAAGACGTATATCATTAGTCGAGA  
ACCACTCATGATATACATTGACGGATTTTGAAGCGAATGAAAGTAAACACTTGGTTGATGTTAGGTGTGTTATTTATTTCTGATGAAATGAAC  
AAGAGAGACTGATGAGATAGTGAACCGCTTTATGAACCGTCTACTGTTTCTCACGGACAGGAAGTTACCATTTGATCCTTCGGTTCGAAATTTCTG  
AAGTGGCGGTTTTAGAGAGGGATGAGGTGGTCAAGGTGATTTGAGCATAGAGCGAGGGCATTTTCAGGGGTGGAGGGACGAGATGGGGATTGAGAA  
GCTGAGGACGCAGAGGTATGGGGTTGGAGGACATTATGGGATGCATTTGTAAGTTTTGGGGGATTGACGAAGGCCCTCTGTCTATTTTCTATCAG  
TACGGATCTTGAAGAAAAGATAGCATGAACACGAGGGCTAATAACTAGGAAATAGCGATTTGGAGCGGAGGTAAACGTGGCATAGACCATTAG  
TACTTTTCTATGGTCTATGTCGACGTATCTCTGATATCGAAGGTGGAGGAACGGAATTTCCACGTATTTGTGGGACCAAAGGAGGAAGGTGGGAG  
GACTTCTTGGAAAATACGGAAGCATTTGGATCCAAGAATGGAGAAAATGTAACAGTAGAAGGGGTGACATTTCAAACCAATCAAGGGAAATGCCG  
TATTCTGGGAAAATACTGACAACAACGGGAGGGGCTATGAT

>Bcin12g03020 (MLST8), partial sequence [organism=Botrytis cinerea, strain D11\_T\_E12]

TCGATTGGCTGCGAAGAAAACCTGCGCAGCACCGAGTCAACAAAAGCACGAATAAACCATCGGCAAGGGAAATATTCTCTGAACCACAACATGAC  
ACGAGCGCGGAAGAGTATATCGGGCGAGAAGCTTTCATCAAGAGCACCAAAGCGACAACGAGTGCATGATAAATTATAACTCTTACGGTGGAAAGAA  
ATGAGAATACAGCAGCTTATGCTTCCGGGAAACTTCCATCTGGAAGTATAAATGTTGGTGGAGGTAGGAAGACCACATTTCAAGAAGAACCCTCG  
AACGGCATTTGTGCTGGCAAGTTGCCCCCTGGAAGTATCAACATTTGGTGGAAAAGAGGCTACCCAAATCGAGGACGAGGGTAGAGCAGCTTAT  
GCTTCCGGAAAATTTGCCCCAGGAAGTATAAACTCTGGCGCAAAGAAGGCGATTTTCATTTCCAAGATGAAACGAGACCGGCTTATGTCTCTGGAA  
AGCTTCCACATGGTAGTATCGACGGTATGCGAAACCGTGAATGGCTGCCGTCCACCGCGAAAATGCTGAGGGTGGGAGGAAACCAGGCCAGGT  
TGCTCTTCTCTATTCACATTCATCCTACTTCAAAGAAAATTTTCGATGAACCCGAAAGAACAAGCGGAACCGGCAAACCATCCAATGCACCT  
TTGACAGAGGAAAATGGCGACTTTACCAATCTAGGGTTATCGAGAAGGCTTGACAGCCCATCTATCGACTAAACTCGATATGAAAGCCCCGACCG  
CCATTCAAAGACATCTGTGCAGCAGTTGGTATCGGACGATAGCGATGCTTTTCATACAAGCAGAGACTGGATCTGGAAAACCTTTGGCATATCT  
ACTACCTATAGTCGAGCGAATATTAGCATTGAGTGAGAATGGCGTACAAA

>Bcin02g07770 (MLST9), partial sequence [organism=Botrytis cinerea, strain D11\_T\_E12]  
CAGCTTTCCCTTTTCGGTCTTGGCATCTACAGTCATTGCCATCCCTACACCATCACAACTTGAGTCTCGGGCCGTTATCGATTCCGATGCCGTTG  
TAGGATTTGCCGAAACTGTTCCAGTGGGACCGTAGGAACAGTTTACGAGGCATATAAACCATTCCTTAAAGTCGTAAATGGATGCGTACCATT  
CCCTGCCGTCGATGCATCGGGTAACACAGGGTATGTCTTATAACCATTCTCTTCCACACGATTGCTATTGAGTCTCTAACATATTTTAGTGGTG  
GTTTGTACCAACTGGCAGTAGCAATGGTGGTTGCAGCAGCAGTACCGGTCAAGTATATGTTTCGAGGAGGACAAAGCGGATCAAACACGCCAT  
CATGTACTCTGGTAAAGTTCTCTCTAAACTTCTCCTTATAGATCCAACCTAACAAAACTTTAGGTACATGCCAAAGGACGAGCCCTCAACCGGT  
ATTGGTCAACGTCACGATTGGGAAGGTGTAATTGTCTGGCTCTCAAGCGCCACCGCCACAACCTGCCGACAACATCTTAGCCGTTTGTCTTCCG  
CCCACGGAGGCTGGGATTGTCCACCGATGGATATTCCTTTCTGGTACCAGCCCTTATCAAGTACGAAAGTATCTGGCCCGTCGATCATTC  
AATGGGTCTTACTAGTACTGTTGGTGGAAAACAACCTATGATTGCTTGGGAGTCTTACCAACTGCTGCTCAAACCTGCTCTTGAGAACACCGAT  
TTCGGTGTGCGAATGTTCCATTTCATTCGGCTGTTTTTCACAGATAATCT

>Bcin04g02090 (MLST10), partial sequence [organism=Botrytis cinerea, strain D11\_T\_E12]  
CGGAGGATGATATGGCAAAGTCTATGATTACCAAAGCATTTGTAGGCATGAGTAGTAAACTGTCGAATATGACTATGAATGATGTTTACAAGCC  
CTACATCCATGTAAGAAAATGTAGAATAGAGAGATCAGTAACTGGAACATAATATCGTTTTGTAGGCTTCAAGTTACTTACGCAGTTCAACCCAAT  
CACTACAGCTATTGCCGAATCCCCACTATTTCAAATGGCTGTCTCAGCAAATACCATCGAAAAGTACACACTGCTAGGCCCTTCTTTCAGAATA  
TCTCCTCTGCAACAGGAAGTTACCAGGGAATACTTCACTGCGCCAAAGACGATAGATAGACGACACATTGCCACATCTCAAGATGCGTTACGAT  
TAACCTTACAAAACCATCAAAAAAGATTTACTTGTATATCATCAACCACTTGTTCGAGCAAGTCCAATCGCAAAAAGCAAAAACCTGGATTGGTT  
CGCTACATTTGTGAATCAAAAATCACAAAACGTCGAGCACTTCAGGTAGACCCGAAAGAGTGTCTTCTGATGGCTTTATGCACAATGTCACCTGT  
GTTCTAGATGGTCTTTGTGAGCCATTTCATGGATACCACATTTCTCGAAAATTTCAAGATTGATATTGATTATCTAAGACGTGCGCCTCGTGTAG  
ATATCAAGGACGAGACCAAGTTGAACGCTGATGAGAAGGCTTCTGAGAAGTATTATGAGGACACTGTTCTTGGCACCTTCAATTTTCATCTCTGA  
GGTCTTCTTTCTGACATTGGCTGCTCATCATTATGGTAGTGAAGCTCTTAATGCCACGCATAAGAGTCTGGAGAAAAGACATCAAATATATTCAA  
AAGCAATTGACTGCCGTTGAAGCA

>Bcin01g07220 (MLST1), partial sequence [organism=Botrytis cinerea, strain D11\_T\_E15]  
ATGGCATATCCTGTTTTCTTTTCGCATTATGCTTTGGAACTGCTGGACAAGCTTGGGTTAGTGTCTGCGTGTAGAAGCACTAAAGAAGATTCT  
CGACAACCGAAGTCATGGTTTTGAGGAATCCAGAAAATCACCTGGCCGTTGAACGAAGTTTTGGATAGGAACCTGAGGAAATGCGTAATCTC  
GTTGGCCGCTTTGCTGGTATTGCATTCACAGCGTTTTTTATGCTATTGATATCAATCATTTGGGCTTTCTGTAATACATGGAACTGACATTAG  
TCTCGATGGCAACTGGGCCAGTTATATACGCTGTCCAAAAACGTTCAATCGCGTGAGTGGAAAATGGGAAAACAAGTGAACCTACGCCCTCTGA  
AATGACCACCTGGCATATTTTTAGAGACTTTCTCCAACATCAAAGTGGTTTCGGGCTTTTACTCTGGAACCTTACTTTGAGACAAAACACACCAA  
GCTACAGAAGAACTTTATAAAGTTGACTAATACGAGCAAACCTACTCGGATTGCTGTGGGATTGACAGATGCGATGTCATTTCTCATCACTG  
CAACTATCTTTTATTATGCCACGGTCTCATTTACCAAGAGAGAGATCAGTATCGCGACTGCACTACAGACTGTCAATCTTCTATTTATTTGGTAT  
TTCTAATAGTACGAATATGCTGGCCATGATACCACAAAATCAACTCTTCTCGCGTTACAGCTACGCATATGCTTGCATTAGCCAATCTCGATTCA  
TCTTCTCCCACGAAAATAAAGGAACCGAACGGCTTTTCGACAATCTTTCCAATCAAATTC AACCGTCTCTCATTCACATATCCTACTCGTCCC  
AAAAACGAACGATATCATCTTTTCTCTCTCCCTGATTCTTAACTCAACAACGCACTTGTTCGACCCCTCCGGCTCCGAAAATCTACAATAGC  
TGCTCTGCTCATTGGTCTCTATCCGCCAGATACTTCAACACCTCCACCGTTGACATCCAATCGCGTCTCCATAAGTAACGTGCACATCCCGTCT  
CTCCGGGCTTCTCTCTCACTCGTTCCACAAAATACCGATTCTATTTCCAGCTACCATTCTCCATAACATCATTTTATGGTCTCCCAGAATCTTCTC  
CTTGTGCTAGTCTTCCATCAGCTATTGCATCAGCAAAAGATGCTGGGATCCATGAATTTATCACATCGCTTCCACAAGGTTATGATACTAT

>Bcin05g07690 (MLST2), partial sequence [organism=Botrytis cinerea, strain D11\_T\_E15]  
ACCCTATCACCAAGTCCTTTTCTGCACTTTCCCTCATCAAAAACGAACGAGAACATCATCAATAAAATACTTTGCTGAAGTAATGGGTTTTATT  
TTGGCCAGGATGCCTTCTCTACGACAGCAAGCCTTCGATGATATGTTGTGGTAGTTCTTGGCTGGCTGGATACTGTCAAATTCATTGATTT  
ACATTCTGAATTGCACTATTCAAACGACTCTCAGCCAGAAATGGTACGGACAACAATATAAGCCTGCATTTGCACATCGAGCGGACTATTTTGG  
GAATTGGCTTCAACAAGGATGGGATACTACTCTCTGTGGTGGTGGGATGATATGGTCACCATACTTACTCCATAACAAGAAATGCAATTACCAATG  
AACTCTATATCGCAGCTTCGATATCGATGTACCTCTATTTCCCCGGAGATGACAATCAATCCCCATTTATGCTTTCCAACCTTTCATATCCACC  
TCACGATCCGAAATATCTACAGGCAGCTGTTGATGCTTACAAATGGCTGAATGGTTCCAACATGACGGATTTACAAGGATTAATATGTCGACGGG  
TATCATATCTCGAATCTTTCTGGCGGTGAAAACACCCATTTGCGATTTAGAAAATGAGATGGTATATAACCTACAATCAAGGTGTTTTGCTTACTG  
GACAACGTGGTTTTGTATGACGCAACCGCCGACGATCATACCTTGTGGATGGCCACAACTCATCGCAATGTTATTAATGCCACAGGCTATGA  
CCTGAAACACAATGTTGTATCTCACCGCCACCCAAAGATGGTTCCGCATTGGCAAAGTGGTTTTGGCTGGGTAGGAATGGAATACCTGGAAGAA  
GGATGCGATTCAAGTGTCTCGTGTCTCAAATGGACAAAACCTTTCAAAGGCATATTTCTTTCATCACTTGAATGCAATCTGTAGTGAATTTGCCAG  
GGGAGCCTATTGCAAGGACGAAAAGAGGCTAGAACTCGACAGAGTGTGGCATTTCTGACAAAATGCTCACAGTATACAAAAT

>Bcin06g01710 (MLST3), partial sequence [organism=Botrytis cinerea, strain D11\_T\_E15]  
GTGAGTCTGACTTTTGTATTTGAGCGTTAAGATGGACACTGATGTACCAAGGCAATCACCTAATTTTCATGGCGTTCTTCCCTGCATCATCTACC  
TACCCTGGAATGCTGGGAGAATTATACTCAGCAGCTTTCACAGCTCCTGCTTTCAATTTGGATCTGTTCCCTGCTGTGACAGAATTTGGAGACGG  
TTGTAATGGATTGGTTGGCCAAGCTTCTCAATCTCCAGACTGTTATTTGTCTGCTGACTCATGGTGGTGGTGTATCCAAGGATCAGCCTCGGA  
AGCTATCGTTACCGTTATGGTTGCTGCCCGGATAAGTATCTTCGTGAAACCACTGAAGTCTGTCCGGAATTTGAACCTGAGGATGCGATTGCA

```
TATAAGAGGAGTAAGCTAGTTGCACTAGGAAGCGAAATGGCACACAGCTCCACGCAGAAAGCAGCGCAGATAGCTGGCGTTAGATTCCGATCGA
TTCCAGTACTCGCATCCAATGATTTGCCATGACGGGTGATGATTTAGAGAAGGTATTGAAAGAATGCAAATCTCAAGGATTGGAACCCCTTCTA
TCTAACTTCGACGTTGGGAACAACATCTACATGCGCAGTTGACGACTTCGCATCTATTGCAACAGTACTTTCAAATATGCACCTCCAGATGTT
GCAGGCGAGATCTGGGTTACGTCGATGCTGCTTATGCAGGTGCAGCTTTGGTTTGCCCTGAATACCATCATCTAACATCGTCTTCCAGCATT
TCCATTCTTTGATATGAACATGCACAAATGGCTTCTGACAAATTTGACGCTTCTTGCCATATATGTCAAGAAACGCAAAGATCTGATCGATGC
ACTCTCCATAACACCAAGTTATCTTCGCAACGAGTTTTCAGAGAGTAGACTCGTAACCGACTATCGGGACTGGCAAATTCCTCTCGGAAGACGT
TTCCGAAGCTTAAAGATTTGGTTTGTCTCAGAACCTACG
```

```
>Bcin09g03030 (MLST4), partial sequence [organism=Botrytis cinerea, strain D11_T_E15]
ACCCTTCAACCCACCGCAGCTCCTATACCGAAAGCGAGTATCCTACCAATTTCTCTTCCACCTGCGACTTTAAGACCATTGGCTTTTTCGCACT
TTCACAAAAAAGCATAGTTTAAACATTGACGTCGTCGGCATTACAAGTGTGGCTACTTTTATTGGAAAGCATTGTGGGACAGGATGGAGGGAGG
AAGGACTGGCAGAGAGAGTCTTGGAGGAGGTCGCCAAGAGTTGGAAGAATAGGAGTGGCGGTGTCATTGTGCGAGGGCGAGGGAACGGAATTGAA
GGAGATTCTGAAAGCTTTGGAAGGGAATATGAGTGGTGAAGGATAGTCATAGGAAGAGAGCTAAGCCGGCAGAATAGTTTAGTACTGGGATCA
TCACAATATGGAGAGGTCAATCATAACAAGACTTGGGCTACGGCCAGGGAATATACCAGAGAGGATAGTCAGTCAAGTTTGGGAATGTCAACGT
TGGAGGTCAATGACGAGGAAGATGAGGATGGCCTGATGGATCCAAGAAGGTGGTTAAAAGTCGTTGATGCATTTGAGCAACCTCGACTGGTGTGA
CAATGTTGCTAAAAAGCACTTTGATAGGTATGTTTCAATGATAAAAATTTTATCTGAATCGACTAACTCAGTACAGAGATACCTCCAAACCTTCA
TTGTTCCACCTGCGTCTCATAAAACACTCCTCTTCCAAAACCGCTATAATGTTATCCATCAACGTCTCCTTCGCAATGAATCTTTTCAAACGC
CCGCTTTTCAAGGTGGCAAATCTTCCCTTCAACGCAGCAGCTCCGCCATTACCACCCAACAACAATCATACAAATTAACGCCGATAGCTAATCT
TCTCGGTGCGCAATCGCAGCTCTCATATGCTTCTCGGTCTCCTCAGTATTTACCCCACTGGTACCCTCGCCATCAATGACCTGACGGGCAGTATC
GCTCTTGATCTTACACACGCAGCAGCCATT
```

```
>Bcin11g01310 (MLST5), partial sequence [organism=Botrytis cinerea, strain D11_T_E15]
ACTGACATGGACCTCATGTGGAACCGCGGTAGAATGCGCAACGCTTGAAGTTCCGCTCGAATATGGCGATGCAACGTCAACGGCAAAGCCAGT
GTTGCGCTTGCTCGTTATCTGCCACTGTTGCCGCGAGCAAGAAGCTCGGGTCTCTTTGATAAAATCCCGGTGGACCCGGTGCCTCTGGTGTG
GCTTTGTGAGTCTGGAGCCGGTGCCGCCGTCGACACTGAGTGGTGGATTATACGATATCATCGGATGGGATCCACGTGGAACCCGGTGCCTC
GGCTCCTATTTTGGAAATGTTTTGCAAATGCCAGTGCAGGAGTATGATTTTAAACAACGCGTTTCCATCTGCTCCGAATCTCTGGCTCGGACAATTT
GCGAATGCCAGCGCAAATCTGCTGTTAGTCTGCTATCACATCCTTTGACACTTCTGTGCTGCTCTTGCAAAAAGCTTGCCTGGCTCAGAAAT
CTCCCGCTCTTTACACCTCAACAGCAGCATATGTTGCTCGAGACATGGCAGCGATAGTCGATGCATTTGGATGGGACCTCTGCAAACTTAACTA
CTGGGGTTTCTCATATGGAACATCTTCCCTAGCTGAGTTTATCCAACTTTCCAGGCCGCGTGGGAAGAGTTCTTGCCGATGGTGTTCGAC
GCAAAGGCAAATGCACTCACATACGTTAGCCAACCTTCCCAACGATCAACTCAGTGTTCGTGCTTGGTGAACGATTTTGCAGCTTTCTGCACCA
CCGCCGGTAGTAAAGGTTGCTCTTTTGCACCGCCCTACTGGAACCTCAGGTAAGTGTGCTACCAGACTGGACAACATAATGAAGGATATGTT
CCTCAATCCTATTTGTTGCTTCGGGCTTGAGCATCA
```

```
>Bcin15g03910 (MLST6), partial sequence [organism=Botrytis cinerea, strain D11_T_E15]
CGCCAAAACACAAAATCATCCAACGATGAAGATGATACTCCACTTCCCTTGATTATCTGGCATGGACTCGGCGATAATTACAAAGCGGATGGTC
TTGCGCAAGTTGGAAAACCTAGCTGAAGCTATTCATCCTGGGACTTTTGTCTATAATATTCATGTAGATGAGGATGCATCTGCAGATAGGACAGC
TACCTTCTTTGGAAATCTCACTCGTGATACATCCCTATTTTTTCTTTAAATACCATACTAACTCTCTTACCAAGTTCAAATCGAAAAGGTCTG
CGAAGACCTCGCCTCCCATCCTATTTCCCTTACCGCGCCCGCGTGCAGCAATTGGATTCTCCCAAGGCGGCCAATTTCTTGCGCGGTTACATA
TCCCGCTGCAATGCTCCACCCATCCGCTCTCTCTGACCTTCGGTTCCCAACACAACGGCATTCTGCTTCCAATCCTGTGGTCCGCGATT
TCCTCTGTGCGGGTGTCAAACCCCTTTTGCAGTCCAACACCTGGTCAACCTTTGTCCAATCTCGTCTCGTACCCGCTCAATACTTCAGAGATCC
GGAAAACCTAGACTCTTACCTTGAATATTTCAATTTCTTGGCCGACATCAATAATGAGCGCGTTCTCAAGAACCAAACATATAAATCCAACATG
GAAAAATTGGAACGATTGTAATGTATGCTTTGAAAGCAGATACAACTGTATCCCTAAGGAAAGTGGATGGTGGGCTGAAGTCAACGGCACGG
AAGTTACACCACTGAAAGAAAGAGCCATTTATAAAGAAAGATTGGCTAGGGTTAAAGACATTGGATGAGGCCGAAAATTAGTTTTTCGAAACCAT
TCCAGGGGGACATATGACGTTAGGAGAGGAGATGCTAGAGAAGGCTTTCAAAGAGTACTTTGGTCCAGCAGGGAAGAAATTTGGG
```

```
>Bcin16g03460 (MLST7), partial sequence [organism=Botrytis cinerea, strain D11_T_E15]
ATGAACCTCTTAATTTGAACTCTTCATTAATTTGCAAGTGTGAAACCCCTATTTCTGCCAGAGGATAGTTACAAGACGTATATCATTAGTCGAGAA
CCACTCATGATATACATTGACGGATTTTTGAAAGCGAATGAAGTAAACACTTGGTTGATGTTAGGTGTGTTATTTATTTCTGATGAAATGAACAA
GAGAGACTGATGAGATAGTGAACCGCTTTATGAACCGTCTACTGTTTCTCACGGACAGGAAGTTACCATTGATCCTTCGGTTCGAAATTTCTGAA
GTGGCGGTTTTAGAGAGGGATGAGGTGGTCAAGTGTATTGAGCATAGAGCGAGGGCATTTCAGGGGTGGAGGGCGAGATGGGGATTGAGAAGTT
GAGGACGCAGAGGTATGGGGTTGGAGGACATTATGGGATGCATTTGTAAGTTTTGGGGATTGACGAAGGCCCTCTGTTTTATTTCTATCAGTACG
GATCTTGAAGAAAAGATAGCATGAACACGAGGGCTAATAACTAGGAAATAGCGATTGGAGCGGAGGTAAACGTGGCATAGACCGATTTAGTACT
TTCATGGTCTATGTCGACGATCCTCTGATATCGAAGGTGGAGGAACGGAATTTCCACGATTTGTGGGACCAAAGGAGGAAGGTGGGAGGACT
TCCTGGAAACTACGGAAGCATTTGGATCCAAGAATGGAGAAAAATGTAACAGTAGAAGGGGTGACATTCAAACCAATCAAGGAAATGCCGTATTC
TGGGAAAATACTGACAACAACGGGAGGGGCTATGAT
```

```
>Bcin12g03020 (MLST8), partial sequence [organism=Botrytis cinerea, strain D11_T_E15]
```



```
CGATTGGCTGCGAAGAAAACCTGCGCAGCACCGAGTCACCAAAAAGCACGAATAAACCATCGGCAAGGAAATATTCTCTGAACCACAACATGACA
CGAGCGCGGAAGAGTATATCGGGCGAGAAGCTTCATCAAGAGCACCAAAGCGACAACGAGTCGATGATAATTATAACTCTTACGGTGGAAAGAAA
TGAGAATACAGCAGCTTATGCTTCCGGGAAAACCTCCATCTGGAAGTATAAATGTTGGTGGAGGTAGGAAGACCACCTTTTCAAGAAGAACCCTCGA
ACGGCATTTGTGCTGGCAAGTTGCCCCCTGGAAAGTATCAACATTGGTGGAAAGAAAGGCTACCCAAATCGAGGACGAGGGTAGAGCAGCTTATG
CTTCCGGAAAATTTGCCCCAGGAAGTATAAACTCTGGCGCAAAGAAGGCGATTTTCATTTCCAAGATGAAACGAGACCAGGCTTATGTCTCTGGAAA
GCTTCCACATGGTAGTATCGACGGTATGCGAAACCGTGAAATGGCTGCCGTCCACCGCGAAAATTGCTGAGGGTGGGAGGAAACCAGGCCAGGTT
GTCTCTTCTTATTACATTTCAATCTACTTCAAAGAAAACCTTTTCGATGAACCCGAAAGAACAAAGCGGAACCGGCAAACCATCCAATGCACCTT
TGACAAAAGAAAATGGCGACTTTACCAATCTAGGGTTATCGAGAAGGCTTGCAGCCCATCTATCGACTAAACTCGATATGAAAGCCCCGACCGC
CATTCAAAAAGCATCTGTGCAGCAGTTGGTATCGGACGATAGCGATGCTTTCATACAAGCAAAGACTGGATCTGGAAAAACCTTTGGCATATCTA
CTACCTATAGTCGAGCGAATATTAGCATTGAGTGAGAATGGCGTACAAA
```

>Bcin02g07770 (MLST9), partial sequence [organism=Botrytis cinerea, strain D11\_T\_E15]

```
CAGCTTTCCCTTTTCGGTCTTAGCATCTACAGTCATTGCCATCCCTACACCATCACAACTTGAGTCTCGGGCCGTTATCGATTCCGATGCCGTTG
TAGGATTTGCCGAAAACCTGTTCCAGTGGGACCGTAGGAACAGTCTATGAGGCATATAAACCATTTCCCTTAAAGTCGTAAATGGATGCGTACCATT
CCCTGCCGTGCGATGCATCGGGTAACACAGGGTATGTCTTATACCATTCTCTTCCACACGATTGCTATTGAGTCTCTAACATATTTTAGTGGTG
GTTTGTACCAACTGGCAGTAGCAATGGTGGTTGCAGCAGCAGTACCGGTCAAGTATATGTTTCGAGGAGGACAAAGCGGATCAAACCTACGCCAT
CATGTACTCCTGGTAAGTTCTCTCTAAACTTCTCCTTATAGATCCAACCTAACAAAATCTTAGGTACATGCCAAAGGACGAGCCCTCAACCGGT
ATTGGTACCGTACAGATTGGGAAGGTGTAATTGTCTGGCTCTCAAGCGCCACCGCCACAACCTGCCGACAACATCTTAGCCGTTTGTCTTCCG
CCCACGGAGGCTGGGATTGTTCACCGATGGATATTTCCCTTTCTGGTACCAGCCCTCTTATCAAGTACGAAAGTATCTGGCCCGTCGATCATTC
AATGGGTCTTACTAGTACTGTTGGTGAAAACAACCTATGATTGCTTGGGAGTCTTTACCAACTGCTGCTCAAACCTGCTCTTGAGAACACCGAT
TTCGGTGTGCGAATGTTCCATTCATTCCGGCTGTTTTACAGATAATCT
```

>Bcin04g02090 (MLST10), partial sequence [organism=Botrytis cinerea, strain D11\_T\_E15]

```
CGGAGGATGATATGGCAAAGTCTATGATTACCAAAGCATTTGTAGGCATGAGTAGTAAACTGTCGAATATGACTATGAATGATGTTTACAAGCC
CTACATCCATGTAAGAAAATGTAGAATAGAGAGATCAGTAACTGGAACATAATATCGTTTGTAGGCTTTCAAGTTACTTACGCAGTTCAACCCAAT
CACTACAGCTATTGCCGAATCCCCACTATTTCAAATGGCTGTCTCAGCAAATACCATCGAAAAGTACACACTGCTAGGCCCTTTCTTTCAGAATA
TCTCCTCTGCAACAGGAAGTTACCAGGGAATACTTCAGTGCGCCAAAGACGATAGATAGACGACACATTTGCCACATCTCAAGATGCGTTACGAT
TAACCTTACAAAACCATCAAAAAGATTTACTTGTATATCATCAACCCTTTGTTTCGAGCAAGTCCAATCGAAAAAGCAAACCCCTGGATTGGTT
CGCTACATTGTGAATCAAAAATCACAAAACGTCGAGCACTTCAGGTAGACCCGAAAGAGTGTCTTCTGATGGCTTTATGCACAATGTCACCTGTC
GTTCTAGATGGTCTTTGTGAGCCATTTCATGGATACCACATTTCTCGAAAATTTTCAAGATTGATATTGATTATCTAAGACGTGCGCCTCGTGTAG
ATATCAAGGACGAGACCAAGTTGAACGCTGATGAGAAGGCTTCTGAGAAGTATTATGAGGACACTGTTCTTGGCACCTTCTAATTTTCATCTCTGA
GGTCTTCTTTCTGACATTGGCTGCTCATATTATGGTAGTGAAGCTCTTAATGCCACGCATAAGAGTCTGGAGAAAAGACATCAAATATATTTCAA
AAGCAATTGACTGCCGTTGAAGCA
```

>Bcin01g07220 (MLST1), partial sequence [organism=Botrytis cinerea, strain D11\_T\_E18]

```
ATGGCATATCTTGTCTTTCTTTTCGCATTATGCTTGGAACGTGCTGGACAAGCTTGGGTTAGTGCTCTGCGTGTAGAAGCACTAAAGAAGATTCTC
GCACAACCGAAGTCATGGTTTGGAGGAATCCAGAAAATTCACCTGGCCGGTTGAACGAAGTTTTGGATAGGAACTCTGAGGAAATGCGTAATCTCG
TTGGCCGCTTTGCTGGTATTGTATTCACAGCGTTTTTTATGCTATTGATATCAATCATTTGGGCTTTTCGTTGAATACATGGAAACTGACATTAGT
CTCGATGGCAACTGGGCCAGTTATATACGCTGTCCACAAAACGTTCAATCGCGTGAGTGGAAAATGGGAAAACAAGTGCAACTACGCCCTTGAA
ATGACCACTGGCATAATTTTCAGAGACTTTCTCCAACATCAAAGTGGTTCGGGCTTTTACTCTGGAACTTACTTTGAGACAAAACACACCAAAG
CTACAGAAGAAGCTTTATAAAGTTGGACTAATACGAGCAAACCTACTCGGGATTGCTGTGGGGATTGACAGATGCGATGTCATTCTTCATCACTGC
AACTATCTTTTATTATGCCACGGTTCCATTACCAAGAGAGAGATCAGTATCGCGACTGCACTACAGACTGTCAATCTTCTATTATTTGGTATTT
CTAATAGTACGAATATGCTGGCCATGATACCACAAAATCAACTCTTCTCGCGTTACAGTACGCATATGCTTGCATTAGCCAATCTCGATTTCATC
TTCTCCCACGAAAAATAAAGGAACCGAACGGCTTTTCGACAATCTTTCCAATCAAATTCACCCGCTCTCATTCACATATCTTACTCGTCCCAGAA
AAACGAACGATATCATCTTTCTCTTTCCCTGATTCCCTAACTCAACAACCTGCACTTGTGCGACCTCCGGCTCCGAAAGTCTACAATAGCTG
CTCTGCTCATTGGTCTTATCCGCCAGATACTTCAACACCTCCACCGTTGACATTCAATCGCGTCTCCATAAGTAACTGTACATTTCCGTCTCT
CCGGGCTTCTCTCTCACTCGTTCCACAAAATACCGATTCTATTTCCAGCTACCATTCTCCATAACATCATTTATGGTCTCCCAGAATCTTCTCTCT
TGTGCTAGTCTTCCATCAGCTACTGCATCAGCAAAGATGCTGGGATCCATGAATTTATCACATCGCTTCCACAAGGTTATGATACAT
```

>Bcin05g07690 (MLST2), partial sequence [organism=Botrytis cinerea, strain D11\_T\_E18]

```
CACCACTATACCAAGTCCTTCTCTGCACTTTCTCATCAAAAACGAACGAGAACATCATCAATAAATACTTTGCTGAAGTAATTGGGTTTTTAT
TTTGGCCAGGATGCCTTCTCTCTACGACAGCAAGCCTTCGATGATATGTTGTGGGTAGTTCTTGGCTGGCTGGATACTGTCAAATTCATTGATT
TACATTCTGAATTGCACTATTCAAACGACTCTCAGCCAGAAATGGTACGGACAACAATATAAACCTGCATTTGCACATCGAGCGGACTATTTTG
GGAATTGGCTTACAAGGATGGGATACTACTCTCTGTGGTGGTGGGATGATATGGTACCATAACCTTACTCCATAACAAGAAATGCAATTACCAAT
GAACTCTATATCGCAGCTTCGATATCGATGTACCTCTATTTCCCCGGAGATGACAAATCAATCCCCATTTATGCTTTCCAACCTTCATATCCAC
CTCACGATCCGAAATATCTACAGGACGCTGTTGATGCTTACAAAATGGTGAATGGTTCACACATGACGGATTTACAAGGATTATATGTGACGG
GTATCATATCTCGAATCTTTCTGGCGGTGAAAACACCCATTGCGATTCTAGAAAATGAGATGGTATATACCTACAATCAAGGTGTTTTGCTTACT
```

GGACAACGTGGTTTTGTATGACGCAACCGCCGACGATCATACCTTGTGGATGGCCACAACTCATCGGAATGTTATTAATGCCACAGGCTATG  
ACCTGAAACACAATGTTGCCATCTCACCGCCACCCAAAGATGGTTCCGCATTGGCAAAGTGGTTTTGGCCTGGGTAGGAATGGAATACTGGAAGA  
AGGATGCGATTCAAGTGTCTCGTGTCTCAAAATGGACAACTTTCAAAGGCATATTTTCCACCTTGATTGCGTTCTGTAGTGATTTGCCA  
GGGGAGCCTATTGCAGGGACGAAGGAAGCCTAGAACTCGACAGAGTGTGGCATTCTGACAAATGCTCACAGTATACAAAAT

>Bcin06g01710 (MLST3), partial sequence [organism=Botrytis cinerea, strain D11\_T\_E18]

GTGAGTCTGACTTTTGTATTTGAGCGTTAAGATGGACACTGATGTACCAAGGCAATCACCTAATTTTCATGGCGTTCTTCCCTGCATCATCTACC  
TACCCTGGAATGCTGGGAGAATTATACTCAGCAGCTTTACACGCTCCTGCTTTCAATTGGATCTGTTCCCTGCTGTGACAGAATTGGAGACGG  
TTGTAATGGATTGGTTGGCCAAGCTTCTCAATCTCCAGACTGTTATTTGTCGTCGACTCATGGTGGTGGTGTATCCAAGGATCAGCCTCGGA  
AGCTATCGTTACCGTTATGGTTGCTGCCCGGATAAGTATCTTCGTGAAACCACTGAAGGTCGTGCGGAATTGAACCTCGAGGATGCGATTGCA  
TATAAGAGGAGTAAGCTAGTTGCACTAGGAAGCGAAATGGCACACAGCTCCACGCGAGAAAGCAGCGCAGATAGCTGGCGTTAGATTCCGATCGA  
TTCCAGTACTCGCATCCAATGATTTCCGCATGACGGGTGATGATTTAGAGAAGGTATTGAAAGAATGCAAATCTCAAGGATTGGAACCTTCTA  
TCTAACTTCGACGTTGGGAACAACATCTACATGCGCAGTTGACGACTTCGCATCTATTGCAACAGTACTTTCAAATATGCACCTCCAGATGTT  
GCAGGCGAGATCTGGGTTACGTCGATGCTGCTTATGCAGGTGCAGCTTTGGTTTTGCCCTGAATACCATCATCTAACATCGTCTTCCAGCATT  
TCCATTCTTTGATATGAACATGCACAAATGGCTTCTGACAAATTTGACGCTTCTTGCCATATATGTCAAGAAACGCAAAGATCTGATCGATGC  
ACTCTCCATAACACCAAGTTATCTTCGCAACGAGTTTTTCAGAGAGTGGACTCGTAACCGACTATCGGGACTGGCAAATTCCTCTCGGAAGACGT  
TTCCGAAGCTTAAAGATTTGGTTTGTCTCAGAACCTAC

>Bcin09g03030 (MLST4), partial sequence [organism=Botrytis cinerea, strain D11\_T\_E18]

GACCCTTCAACCCACCGCAGCTCCTATACCGAAAGCGAGTATCTTACCAATTTCTCTTCCACCTGCGACTTTAAGACCATTGGCTTTTCGCAC  
TTTACAAAAAAGCATAGTTAACATTGACGTCGTCGGCATTACAAGTGTGGCTACTTTTATTTGGAAAGCATTGTGGGACAGGATGGAGGGAG  
GAAGGACTGGCAGAGAGAGTCTTGGAGGAGGTCGCCAAGAGTTGGAAGAATAGGAGTGGCGGTGTCATTGTGCGAGGGCGAGGAAACGGAATTGA  
AGGAGATTCTGAAAGCTTTGGAAGGGAATATGAGTGGTGAAGGATAGTCAATAGGAAGAGAGCTAAGCCGGCAGAATAGTTTAGTACTGGGATC  
ATCACAATATGGAGAGGTCAATCATAAAGACTTGGGCTACGGCCAGGGAATATACCCAGAGAGGATAGTCAGTCAAGTTTGGGAATGTCAACG  
TTGGAGGTCAATGACGAGGAAGATGAGGATGGCTGATGGATCCAAGAAGGTGGTTAAAAGTCGTTGATGCATTTGAGCAACCTCGACTGGTGT  
ACAATGTTGCTAAAAAGCACTTTGATAGGTATGTTTCAATGATAAAATTTTATCTGAAATCGACTAACTCAGTACAGAGATACCTCCAAACCTTC  
ATTGTTCCACCTGCGTCTCATAAAACACTCCTCTTCCAAAACCGCTATAATGTTATCCATCAACGTCCTCTTCGCAATGAATCTTTTCAAACG  
CCCGCTTTTCAAGGTGGCAAATCTTCCCTTCAACGCAGCAGTCCGCCATTACCACCCAACAACAATCATACAAATTAACGCCGATAGCTAATC  
TTCTCGGTGCAATCGCAGCTCTCATATGCTTCTCGGTCTCCTCAGTATTTACCCACTGGTACCCCTGCCATCAATGACCTGACGGGCAGTAT  
CGCTCTTGATCTTACACACGCAGCAGCCATTC

>Bcin11g01310 (MLST5), partial sequence [organism=Botrytis cinerea, strain D11\_T\_E18]

ACTGACATGGACCTCATGTGGAACCGGCGTAGAATGCGCAACGCTTGAAGTTCCGCTCGAATATGGCGATGCAACGTCAACGGCAAAGCCAGT  
GTTGCGCTTGCTCGTTATCTGCCACTTTTGGCCGAGCAAGAAGCTCGGCTCTCTCTTGATAAAATCCCGGTGGACCCGGTGCCTCTGGTGTG  
GCTTTGTGAGTCTGGAGCTGGTGCCCGCTCTGACACTGAGTGGTGGATTATACGATATCATCGGATGGGATCCACGTGGAACCGGTGCTTC  
GGCTCTATTTTGGAAATGTTTTGCAAATGCCAGTGGGAGTATGATTTTAAACAACGCGTTTCCATCTGCTCCGAATCTCTGGCTCGGACAATTT  
GCGAATGCCAGCGCAAATTTCTGCTGTTAGCTCTGCTATCACATCCTTTGACACTTCTGTGCTGCTCTTGCAAAAGCTTGCCTGGCTCAGAAAT  
CTCCCGCTCTTTACACCTCAACAGCAGCATATGTTGCTCGAGACATGGCAGCGATAGTCGATGCATTTGGATGGGACCTCTGCAAAACTTAACTA  
CTGGGGTTTCTCATATGGAACATCTTCTTAGCTGAGTTTATCCAACTTTCCAGGCCGCTGGGAAGAGTTCTTGGCGATGGTGTTCGAC  
GCAAAGGCAAATGCACTCACATACGTTAGCCAACTTCCCAACGATCAACTCAGTGTTCGTGCTTCGTTGAACGATTTTGCAGCTTCTGACCA  
CCGCCGGTAGTAAAGGTTGCTCTTTTGGCACCGCCCTACTGGAACCTCAGGTACTGTTGCTACCAGACTGGACAACATAATGAAGGATATGTT  
CCTCAATCCTATTGTTGCTTCGGGCTTGAGCATCA

>Bcin15g03910 (MLST6), partial sequence [organism=Botrytis cinerea, strain D11\_T\_E18]

GCCAAAACACAAAATCATCCAACGATGAAGATGATACTCCACTTCCCTTGATTATCTGGCATGGACTCGGCGATAATTACAAAGCGGATGGTCT  
TGCGCAAGTTGAAAACTAGCTGAAGCTATTCATCTGGGACTTTTGTCTATAAATATTCATGTAGATGAGGATGCATCTGCAGATAGGACAGCT  
ACCTTCTTTGGAAATCTCACTCGTGAGTACATCCCTATTTTTCTTTAAATACCATACTAATCTCTTACCAAGTTCAAATCGAAAAGGTCGT  
CGAAGACCTCGCCTCCCATCCTATTCTCTTACCAGCCCGCCGCTGACGCAATGGATTCTCCCAAGGCGGCCAATTTCTTGCAGGTTACATA  
TCCCCTGCAATGCTCCACCCATCCGCTCTCTCTGACCTTCGGTTCCCAACACAACGGCATTCTGCTTCCAAATCCTGTGGTCTGCCGATT  
TCCTCTGTGCGGTGCTCAAACCTTTTGCATCCAACACCTGGTCAACCTTTTGTCCAATCTCGTCTCGTACCCGCTCAATACTTCCAGAGATCC  
GGAAAACCTAGACTCTTACCTTGAATATTTCCAATTTCTTGGCGACATCAATAATGAGCGGCTTCTCAAGAACCCAAACATATAAATCCAACATG  
GAAAAATTGGAACGATTTCGTAATGTATGCTTTGAGAGCAGATACAACTGTATCCCTAAGGAAAGTGGATGGTGGGCTGAAGTCAACGGCACGG  
AAGTTACACCACTGAAAGAAAGAGCCATTTATAAAGAAGATTGGCTAGGGTTAAAGACATTTGGATGAGGCCGAAAAATTAGTTTTTCGAAACCAT  
TCCAGGGGGACATATGACGTTAGGAGAGGAGATGCTAGAGAAGGCTTTCAAAGAGTACTTTGGTCCAGCAGGGAAGAAATTTGGGG

>Bcin16g03460 (MLST7), partial sequence [organism=Botrytis cinerea, strain D11\_T\_E18]

ATGAACCTCTAATTTGAACTCTTCATTAATTTGCAAGTGTAGAGCCCTATTCTGCCAGAGGATAGTTACAAGACGTATATCATTTAGTCGAGA

ACCACATCATGATATACATTGACGGATTTTTGAAAAGCGAATGAAAAGTAAACACTTGGTTGATGTTAGGTGTGTTATTTATTTCTGATGAAATGAAC  
AAGAGAGACTGATGAGATAGTGAACCGCTTTATGAACCGTCTACTGTTTCTCACGGACAGGAAGTTACCATTGATCCTTCGGTTCGAAATTCG  
AAGTGGCGGTTTTAGAGAGGGATGAGGTGGTCAGGTGTATTGAGCATAGAGCGAGGGCATTTCAGGGGTGGAGGGACGAGATGGGGATTGAGAA  
GCTGAGGACGCAGAGGTATGGGGTTGGAGGACATTATGGGATGCATTTGTAAGTTTTGGGGGATTGACGAAGGCCCTGTCTATTTTCTATCAG  
TACGGATCTTGAAAAGAAAGATAGCATGAACACGAGGGCTAATAACTAGGAAATAGCGATTGGAGCGGAGGTAAACGTGGCATAGACCGATTTAG  
TACTTTTATGTTCTATGTCGACGTATCCTCTGATATCGAAGGTGGAGGAACGGAATTTCCACGTATTGTGGGACAAAAGGAGGAAGGTGGGAG  
GACTTCTGGAAAACACGGAAGCATTTGGATCCAAGAACTGGAGAAAAATGTAACAGTAGAAGGGGTGACATTCAAACCAATCAAGGGAAATGCCG  
TATTTCTGGGAAAATACTGACAACAACGGGAGGGGCTATGAT

>Bcin12g03020 (MLST8), partial sequence [organism=Botrytis cinerea, strain D11\_T\_E18]  
CGATTGGCTGCGAAGAAAACCTGCGCAGCACCAGTCAACAAAAGCACGAATAAACCATCGGCAAGGGAAATATTTCTCTGAACCACAACATGACA  
CGAGCGCGGAAGAGTATATCGGGCGAGAAGCTTCATCAAGAGCACCAAAGCGACAACGAGTCGATGATAATTATAACTCTTACGGTGGAAAGAAA  
TGAGAATACAGCAGCTTATGCTTCCGGGAAACTTCCATCTGGAAGTATAAATGTTGGTGGAGGTAGGAAGACCACTTTTCAAGAAGAACCCTCGA  
ACGGCATTGTGCTGCGTGGCAAGTTGCCCTTGGAAAGTATCAACATTTGGTGGAAAGAAAGGCTACCCAAATCGAGGACGAGGGTAGAGCAGCTTATG  
CTTCCGGAAAATTTGCCCCAGGAAGTATAAACTCTGGCGCAAAGAAAGCGATTTCATTTCCAAGATGAAACGAGACCGGCTTATGTCTCTGGAAA  
GCTTCCACATGGTAGTATCGACGGTATGCGAAACCGTGAAATGGCTGCCGTCCACCGCGAAAATGCTGAGGGTGGGAGGAAACCAGGCCAGGTT  
GTCTCTTCTATTCACATTCATCTACTTCAAAGAAAACCTTCGATGAACCCGAAGAACAAGCGGAACCGGCAAACCATCCAATGCACCTT  
TGACAGAGGAAAATGGCGACTTTCACCAATCTAGGGTTATCGAGAAGGCTTGACAGCCATCTATCGACTAAACTCGATATGAAAGCCCCGACCGC  
CATTCAAAAAGCATCTGTGCAGCAGTTGGTATCGGACGATAGCGATGCTTTCATACAAGCAGAGACTGGATCTGGAAAACCTTTGGCATATCTA  
CTACCTATAGTCGAGCGAATATTAGCATTGAGTGAGAATGGCGTACAAA

>Bcin02g07770 (MLST9), partial sequence [organism=Botrytis cinerea, strain D11\_T\_E18]  
CAGCTTTCCCTTTTCGGTCTTGGCATCTACAGTCATTGCCATCCCTACACCATCACAACTTGAGTCTCGGGCCGTTATCGATTCCGATGCCGTTG  
TAGGATTTGCCGAAACTGTTCCAGTGGGACCGTAGGAACAGTTTACGAGGCATATAAACCATTCCTTAAAGTCGTAAATGGATGCGTACCATT  
CCCTGCCGTCGATGCATCGGGTAACACAGGGTATGTCTTATAACCATCTCTTCCACACGATTGCTATTGAGTCTTAACATATTTTAGTGGTG  
GTTTGTACCAACTGGCAGTAGCAATGGTGGTTGACGACGAGTACCGGTCAAGTATATGTTTCGAGGAGGACAAAGCGGATCAAACCTACGCCAT  
CATGTACTCTTGGTAAAGTCTCTCTAAACTTCTCCTTATAGATCCAACCTAACAAAATCTTAGGTACATGCCAAAGGACGAGCCCTCAACCGGT  
ATTTGGTACCGTACGATTGGGAAGGTGTAATTTGCTGGCTCTCAAGCGCCACCGCCACAACCTGCCGACAACATCTTAGCCGTTTGTCTTCCG  
CCCACGGAGGCTGGGATTGTTCCACCGATGGCTATTTCCCTTTCTGGTACCAGCCCTCTTATCAAGTACGAAAAGTATCTGGCCCCGTCGATCATTC  
AATGGGTCTTACTAGTACTGTTGGTGGAAAACAACCTATGATTGCTTGGGAGTCTTTACCAACTGCTGCTCAAACCTGCTCTTGAGAACACCGAT  
TTCGGTCTGCGAATGTTCCATTCATTCGGCTGTTTTACAGATAATCT

>Bcin04g02090 (MLST10), partial sequence [organism=Botrytis cinerea, strain D11\_T\_E18]  
CGGAGGATGATATGGCAAAGTCTATGATTACCAAAGCATTTGTAGGCATGAGTAGTAAACTGTCGAATATGACTATGAATGATGTTTACAAGCC  
CTACATCCATGTAAGAAATGTAGAATAGAGAGATCAGTAACTGGAATAATATCGTTTTGTAGGCTTTCAAGTTACTTACGCAGTTCAACCCAAT  
CACTACAGCTATTGCCGAATCCCCTACTATTTCAAATGGCTGTCTCAGCAAATACCATCGAAAAGTACACACTGCTAGGCCCTTTCTTCAAGATA  
TCTCCTCTGCAACAGGAAGTTACCAGGGAATACTTCAAGTGCGCCAAAGACGATAGATAGACGACACATTGCCACATCTCAAGATGCGTTACGAT  
TAACCTTACAAACCCATCAAAAAGATTTACTTGTATATCATCAACCACTTTGTTTCGAGCAAGTCCAATCGCAAAAAGCAAAACCCCTGGATTGGTT  
CGCTACATTTGTGAATCAAAAATCACAAACGTCGAGCACTTCAGGTAGACCCGAAAGAGTGTCTTCTGATGGCTTTATGCACAATGTCACGTGTC  
GTTCTAGATGGTCTTTGTGAGCCATTCATGGATACCACATTTCTCGAAAATTTTCGAAGATTGATATTGATTATCTAAGACGTGCGCCTCGTGTAG  
ATATCAAGGACGAGACCAAGTTGAACGCTGATGAGAAGGCTTCTGAGAAGTATATGAGGACACTGTTCTTGGCATTCTAATTTTCTATCTCTGA  
GGTCTTCTTCTGACATTTGGCTGCTCATATTATGGTAGTGAAGCTCTTAATGCCACGCATAAGAGTCTGGAGAAAAGACATCAAATATATTTCAA  
AAGCAATTGACTGCCGTTGAAGCA

>Bcin01g07220 (MLST1), partial sequence [organism=Botrytis cinerea, strain D11\_T\_WF43]  
ATGGCATACTTGTCTTTTTCGATTATGCTTTGGAACGTGCTGGACAAGCTTTGGGTTAGTGCTCTGCGTGTAGAAGCACTAAAGAAGATTCT  
CGCACAACCGAAGTCATGGTTTTGAGGAATCCAGGAATTCACCTGGCCGGTTGAACGAAGTTTTGGATAGGAACCTCGAGGAAATGCGTAATCTC  
GTTGGCCGCTTTGCTGGTATTGTATTACAGCATTTTTTTATGCTATTGATATCAATCATTTGGGCTTTTCGTGAATACATGGAACCTGACATTAG  
TCTCAATGGCGACTGGCCAGTTATATACGCTGTACCCAAAACGTTCAATCGCGTGTAGTGGAAAATGGGAAAACAAGTGCAACTACGCATCTGA  
AATGACCACTGGCATAATTTTCAGAGACTTTCTCCAACATCAAAGTGGTTTCGGGCTTTTACTCTGGAACTTACTTTGAGACAAAACACACCAA  
GCTACAGAAGAACTCTATAAAAATTTGGACTAATACGAGCAAACCTACTCGGGATTGCTGTGGGGATTGACAGATGCGATGTCATTTCTATCACTG  
CAACTATCTTTTATTATGCCACGGTCTCATTACCAAGAGAGAGATCAGTATCGCGACTGCAGTGCAGACTGTCAATCTTCTATTTATTTGGTAT  
TTCTAATAGTACGAATATGCTGGCCATGATACCACAAAATCAACTCTTCTCGGTTACAGCTACGCATATGCTTGCATTAGCCAATCTCGATTCA  
TCTTCTCCACGAAAATAAAGGAGCCGAAACGGCTTTTCGACAATCTTTCCAATCAAATTCACAGTCTCTCATTTACATATCCTACTCGTCTG  
AAAAACGAACGATATCATCTTTTCTCTTTCCCTGATTCTAACTCAACAACTGCACTTGTCCGACCCCTCCGGCTCCGAAAATCTACAATAGC  
TGCTCTGCTCGTTGGTCTCTATCCGCCAGATACTTCAACACCTCCACCGTTGACATTCATCGTGTCTCCATAAGTAACTGTACATTTCCGCTC  
CTCCGGGCTTCTCTCTCACTCGTCCACAAAATACCGATTCTATTTCCAGTACCATTCTCCATAACATCATTTATGGTCTCCAGAACTCTTCTC

CTTGTGCTAGTCTTCCATCTGCTATTGCATCAGCAGAAGATGCTGGGATCCACGAATTTATCACATCGCTTCCACAAGGTTATGATACTAT

>Bcin05g07690 (MLST2), partial sequence [organism=Botrytis cinerea, strain D11\_T\_WF43]

ACCCTATCACCAAGTCCCTTTTCTGCACTTTCCCTCATCAAAAAACGAACGAGAACATCATCAATAAACTTTTGCTGAAGTAATTGGGTTTTATT  
TTGGCCAGGATGCCCTTCTCTCTACGACAGCAAGCCTTCGATGATATGTTGTGGGTAGTTCTTGGCTGGCTGGATACTGTCAAATTCATTGATTT  
ACATTCTGAATTGCACTATTCAAACGACTCTCAGCCAGAATGGTACGGACAACAATATAAACCTGCATTTGCACATCGAGCGGACTATTTTGG  
GAATTGGCTTCCACAAGGATGGGATACTACTCTCTGTGGTGGTGGGATGATATGGTCACCATACTTACTCCATAACAAGAACGCAATTACCAATG  
AACTCTATATCGCAGCTTCGATATCGATGTACCTATATTTCCCCGGAGATGACAATCAATCCCCATTTATGATTTCCAACCCCTTCATATCCACC  
TCACGATCCGAAATATCTACAGGCAGCTGTTGATGCTTACAAATGGCTGAATGGTTCCAACATGACGGATTCACAAGGATTATATGTCGACGGG  
TACCATATCTCGAATCTTTCTGGCGGTGAAAACACCCATTGCGATTCTAGAAATGAGATGGTATATAACCTACAATCAAGGTGTTTTGCTTACTG  
GACAACGTGGTTTTGATGACGCAACC GCCGACGATCATACCTTGTAGATGGCCACAACTCATCGCGAATGTTATTAATGCCACAGGCTATGA  
CCTGAAACACAATGTTGTCATCTCACC GCCACCCAAAGATGGTTCCGCATTTGGCAAAGTGGTTTTGGCCTGGGTAGGAATGGAATACTGGAAGAA  
GGATGCGATTCAAGTGCTTCGTGTTCTCAAATGGACAACTTTCAAAGGCATATCTTTTCATCACTTGATTGCGTTCGTAGTATTGCCAG  
GGGAGCCTATTGCAGGGACGAAGGAAAGCTTAGAACTCGACAGAGTGTGGCATTCTGACAAATGCTCACAGTATACAAAAT

>Bcin06g01710 (MLST3), partial sequence [organism=Botrytis cinerea, strain D11\_T\_WF43]

GGTGAGTCTGACTTTTGTGTTTGTAGCGTTAAGATAGACTGATGTACCAAGGCAATCACCTAATTTTCATGGCGTTCTTCCCTGCATCATCTAC  
CTACCCTGGAATGCTGGGAGAATTATACTCAGCAGCTTTCACAGCACCTGCTTTCAATTTGGATCTGTTCCCCTGCCGTGACAGAATTGGAGACG  
GTTGTAATGGATTGGCTGGCCAAGCTTCTCAATCTCCAGACTGTTATTTGTCTTCGACTCATGGTGGTGGTGTATCCAAGGATCAGCCTCGG  
AAGCTATCGTTACCGTTATGGTTGCTGCCCGGATAAAATATCTTCTGTAACTACTGAAGTCTGTGGGCATTGAACTCGAGGATGCGATTGC  
ATATAAGAGGAGTAAGCTAGTTGCACTAGGAAGCGAAATGGCACACAGCTCCACGCAGAAAGCAGCGCAGATAGCTGGCGTTAGATTCGGATCG  
ATTCAGTACTCGCATCCAATGATTTTCGCCATGACGGGTGATGATTTAGAGAAGGTATTGGAAGAAATGCAAATCTCAAGGATTTGGAACCCCTTCT  
ATCTAACTTCGACTTTGGGAACAACATCTACATGCGCAGTTGACGACTTCGCATCTATTGCAACAGTACTTTCAAATATGCACCTCCAGATGT  
TGCAGGCGAGATCTGGGTTACGTCGATGCTGCTTATGCAGGTGCAGCTTTGGTTTTGCCCTGAATACCATCATCTAACATCGTCCTTCCAGCAT  
TTCCATTCCTTCGATATGAACATGCACAAATGGCTTCTGACAAATTTTCGACGCTTCTTGTCTATATGTCAAGAAACGCAAAGATCTGATAGATG  
CACTCTCCATAACACCAAGTTATCTTCGCAACGAGTTTTTCAGAGAGTGGACTCGTAACCGACTATCGGGATTGGCAAATTCCTCTCGGAAGACG  
CTTCCGAAGCTTAAAGATTTGGTTTGTCTCAGAACCCTAC

>Bcin09g03030 (MLST4), partial sequence [organism=Botrytis cinerea, strain D11\_T\_WF43]

ACCCTTCAACCCACCAGCTCCTATACCGAAAGCGAGTATCCTACCAATTCCTTCCACCTGCGACTTTAAGACCATTGGCTTTCCGCCT  
TTCACAAAAAAGCATAGTTTAAACATTGACGTCGTCCGCATTACAAGTGTGGCTACTTTTTATTGAAAGCATTGTGGGACAGGATGAGGGAAGA  
AGGACTGGCAGAGAGAGTCTTGGAGGAGGTCCGAAGAGTTGGAAGAAATAGGAGTGGCGGTGTCATTGTGCGAGGGCGAGGGAACGGAATTGAGG  
AGATTCTGAAAGCTTTGAAGGGAATATGAGTGGTGGAAAGGATAGTCATAGGAAGAGAGCTAAGCCGGCAGAAATAGTTTAGCACTGGGATCATCA  
CAATATGGAGAGGTCAATCATACAAGACTTGGGCTACGGCCAGGGAATATACCCAGAGAGGATAGTCAAGTTTGGGAATGTCAACGTTGG  
AGGTCAATGACGAGGAGGATGAGGATGGCTGATGGATCCAAGAAGTGGTTAAAAAGTCATTGATGCATTTGAGCAACCTCGCACTGGTGTAC  
AATGTTGCTAAAAAGCACTTTGATAGGTATGTTTCAATGATAAAATTTTATCTGAATCTACTAACCTCAGTACAGAGATACCTCCAAACCTTCAT  
TGTTCCACCTGCGTCTCATAAAAAACTCCTCTTCCAAAACCGCTATAATGTTATCCATCAACGTCTCCTTCGCAATGAATCTTTTCAAACG  
CCCGCTTTTACAGGTGGCAAATCTTCCCTTACGCAGCAGTCCGCCATTACCACCCAACAACAATCATACAATTAACGCCGATAGCTAATCTT  
CTCGGTGCAATCGCAGCTCTCATATGCTTCTCGGTCTCCTCGGTATTTACCCACTGGTACCCTCGCCATCAATGACCTGACGGGCAGTATCG  
CTCTCGATCTACACACGCAGCAGCCATTC

>Bcin11g01310 (MLST5), partial sequence [organism=Botrytis cinerea, strain D11\_T\_WF43]

GCTGACATGGACCTCATGTGGAACCGCGTAGAATGCGCAACGCTTGAAGTTCCGCTCGAATATGGCGATGCAACGTCAACGGCAAAGCCAGT  
GTTGCGCTTGCTCGTTATCTGCCACTGTTGCCGCGAGCAAGAAGCTCGGGTCTCTCTTGATAAAACCCCGGTGGACCCGGTGCCTCTGGTGTG  
GCTTTGTGCACTCTGGAGCCGGTGCCCGCTCTCGACACTGAGTGGTGGATTGTACGATATCATCGGATGGGATCCACGTGGAACCGGTGCCTC  
GGCTCCTATTTTGAATGTTTTGCAAATGCCAGTGGGAGTATGATTTTAAACAACGCGTTTCCATCTGCTCCGAATCTCTGGCTCGGACAATTT  
GCGAATGCCAGCGCAAATTTCTGCTGTTAGCTCTGCTATCACATCCTTTGACACTTCTGTGCGTGCCTTTGCAAAAGCTTGGCTGGCTCAGAAAT  
CTCCCGCTCTTTACACCTCAACAGCAGCATATGTTGCTCGAGACATGGCAGCGATAGTTCGATGCATTTGGATGGGACCTCTGCAAACTTAACTA  
CTGGGGTTTCTCATATGGAATATCTTCCCTAGCTGAGTTTATCCAACTTTCCAGGCCGCTGGGAAGAGTTCTTGCCGATGGTGTTCGAC  
GCAAAGGCAAATGCACTCACATACGTTAGCCAATTTCCCAACGATCAACTCAGTGTTCGTGCTTCGTTGAACGATTTTGCAGCTTTCTGCACCA  
CCGCCGGTAGTAAAGGTTGCTCTTTTGGCACCGCCCTACTGGAACCTCAGGTAAGTGTGCTACCAGACTGGACAACATAATGAAGGATATGTT  
CCTCAATCCTATTGTTGCTTCGGGCTTAAAGCATCA

>Bcin15g03910 (MLST6), partial sequence [organism=Botrytis cinerea, strain D11\_T\_WF43]

GCCAAAACACAAAATCATCCAACGATGAAGATGATACTCCACTTCCCTTGATTATCTGGCATGGACTCGGCGATAATTACAAAGCGGATGGTCT  
TGCGCAAGTTGGAACACTAGCTGAAGCTATTCATCTGGACTTTTGTCTACAATATTCATGTAGATGAGGATGCATCTGCAGATAGGACAGCT  
ACCTTCTTTGAAAATCTCACTCGTGAAGTACATCCCTATTTTCTTTAAATATCATACTAACTCTCTTACCAAGTTCAAATCGAAAAGGCTCTG

```
CGAAGACCTCGCCTCCCATCCTATTCTCTCTACCGCGCCCGCGCTCGACGCAATTGGATTCTCCCAAGGCGGCCAATTCTTGCCTGGTTACATA
TCCCCTGCAATGCTCCACCCATCCGCTCTCTCTGACCTTTGGTTCCCAACACAACGGCATTCTGCCTTCCAAGCCTGTGGTCTGCCGATT
TCCTCTGTGCGGGTGTCAAACCTTTTGGGATCCAACACCTGGTCAACCTTTGTCCAATCTCGTCTCGTACCCGCTCAATACTTCAGAGATCC
GGAAAACTAGACTCTTACCTTGAATATTCCAATTTCCCTTGCCGACATCAATAATGAGCGCGTTCTCAAGAACCACAAACATATAAAATCCAACATG
GAAAAATTGGAACGATTTCGTAATGTATGTCTTTGAAGACGACACAACCTGTCAATTCCTAAGGAAAGTGGATGGTGGGCTGAAGTCAACGGCACGG
AAGTTACACCACTGAAAGAAAGAGCCATTTATAAAGAAGATTGGCTAGGTTTAAAGACATTGGATGAGGCCGAAAATTAGTTTTCGAAACCAT
TCCAGGGGGACGTATGACGTTAGGAGAGGAGATGCTAGAGAAGGCTTTCAAAGAGTATTTTGGTCCAGCAGGGAAGAAATTTGGG
```

```
>Bcin16g03460 (MLST7), partial sequence [organism=Botrytis cinerea, strain D11_T_WF43]
ATGAACCTCTTGATTTGAACTCTTCATTAATTGCAAGTGATGAACCCCTATTCTGCCAGAGGATAGTTACAAGACGTATATCATTTAGTCGAGA
ACCACCTCATGATATATATTGACGGATTTTGGAAAAGCGAATGAAAAGTAAACATTTGGTTGATGTTAGGTGTGTTATTTATTTCTGATGAAATGAAC
AAGAGAGACTGATGAGATAGTGAACCCGCTTTATGAACCGTCTACTGTTTCTCACGGGCAGGAAGTTACCATTGATACTTCAGTTTCGAAATTTCTG
AAGTGGCGGTTTTAGAGAGGGATGAGGTGGTCAAGGTGATTTGAGCATAGAGCGAGGGCATTTCAGGGTGGAGGGGCGAGATGGGGATTGAGAAG
TTGAGGACGCAGAGGTATGGGGTTGGAGGACATTTATGGGATGCATTTGTAAGTTTTGGGGGATTGACGAAGGCTTCTGTCTATTTTTCTACCAGT
ACGGATCTTGAAGAAAAGATAGCATGAACACGAGGGCTAATAACTAGGAAATAGCGATTGGAGCGGAGGTAAACGTGGCATAGACCGATTTAGT
ACTTTTCATGGTCTATGTGCGACGTATCCTCTGATATCGAAGGTGGAGGAACGGAATTTCCACGTATTGTGGGACCAAAGGAGGAAGGTGGGAGG
ACTTCTTGAAACTACGGAAGCATTTGGATCCAAGAACTGGAGAAAATGTAACAGTAGAAGGGGTGACATTTCAAACCAATCAAGGGAATGCCGT
ATTCTGGGAAAATACTGACAACAACGGGAGGGGCTATGAT
```

```
>Bcin12g03020 (MLST8), partial sequence [organism=Botrytis cinerea, strain D11_T_WF43]
CGATTGGCTGCGAAGAAAAGTGCAGCACCAGTCAACAAAAGCAGAAATAAACCATCGGCAAGGAAAATATTCTCTGAACCACAACATGACA
CGAGCGCGGAAGAGTATATCGGGCGAGAAGCTTCATCAAGAGCACCAAAGCGACAACGAGTCGATGATAAATTATAACTCTTACGGTGGAAAGAAA
TGAAAATACAGCAGCTTATGCTTCCGGGAAAAGTTCATCTGGAAGTATAAATGTTGGTGGAGGTAGGAAGACCCTTTTCAAGAAGAACCCTCGA
ACGGCATTGTGCTGGCAAGTTGCCCTTGAAGTATCAACATTTGGTGGAAAGAAGGCTACCCAAATCGAGGACGAGGGTAGAGCAGCTTATG
CTTCCGAAAATTTGCCCCAGGAAGTATAAACTCTGGCGCAAAGAAGGCGATTTCAATCCAAGATGAAACGAGACCGGCTTATGTCTCCGAAA
GCTTCCACATGGTAGTATCGACGGTATGCGAAAACCGTGAATGGCTGCCGTCCACCGCGAAAATTTGCTGAGGGTGGGAGGAAACCAGGCCAGGTT
GTCTCTTCTCTATTTCACATTTCAATCCTACTTCAAAGAAAAGTTCGATGAGCCAGAAGAACAAGCGGAACCGGCAAACCATCCAATGCGCCTT
TGACAGAGGAAAATGGCGACTTTACCAATCTAGGGCTATCGAGAAGGCTTGCAGCCATCTATCGACTAACTCGATATGAAAGCCCCGACGGC
CATTTCAAAAAGCATCTGTGCAGCAGTTGGTATCGGACGATAGCGATGCTTTCATACAAGCAGAGACTGGATCTGGAAAAGTTCGATATCTA
CTACCTATAGTCGAGCGAATATTAGCATTGAGTGAGAATGGCGTACAAA
```

```
>Bcin02g07770 (MLST9), partial sequence [organism=Botrytis cinerea, strain D11_T_WF43]
CAGCTTTCCCTTTTCGGTCTTGGCATCTACAGTCAATTGCCATCCCTACACCATCACAACCTTGAGTCTCGGGCCGTTATCGATTCCGATGCCGTTG
TAGGATTTGCCGAAAAGTGTCCAGTGGGACCGTAGGAACAGTTTATGAGGCATATAAACCATTTCTTAAAGTCGTAAATGGATGCGTACCATT
CCCTGCCGTGATGCATCGGGTAACACAGGGTATGTCTTATACTTTCTCTTCCACACGATTGCTATTGAGTCTCTAACATATTTTAGTGGTG
GTTTGTACCAACTGGCAGCAGCAATGGTGAATGCAGCAGCAGTACCGGTCAAGTATATGTTTCGAGGAGGACAAAGCGGATCAAACCTACGCTAT
CATGTACTCCTGGTAAAGTTCTCTTTAAACTTCTCCTTATAGATCCAACCTAACAAAATCTTAGGTACATGCCAAAGGACGAGCCCTCAACCGGT
ATTGGTCAACCGTCACGATTGGGAAGGTGTAATTTGTCTGGCTCTCCAGCGCCACCGCCACAACCTGCCGACAACATCTTAGCCGTTTGTCTTCCG
CCCACGGAGGCTGGGATTTGTCCACGGATGGCTATTTCCCTTTCTGGTACCAGCCCTCTTATCAAGTACGAAAGTATCTGGCCCGTCGATCACTC
AATGGGTCTTACTAGTACTGTTGGTGGAAAACAACCTATGATTGCTTGGGAGTCTTTACCAACTGCTGCTCAAACCTGCTCTTGAGAACACCGAT
TTCGGTGTGCGAATGTTCCATTCATTCCGGCTGTTTTTCACAGATAATCT
```

```
>Bcin04g02090 (MLST10), partial sequence [organism=Botrytis cinerea, strain D11_T_WF43]
CGGAGGATGATATGGCAAAAGTCTATGATTACCAAAGCATTTGTAGGCATGAGTAGTAAATTTGTCGAATATGACTATGAATGATGTTTACAAGCC
CTACATCCATGTAAGAAAATGTAGAATAAAGAGATCAGTAACTGGAACATAATATCGTTTGCAGGCTTTCAAGTTACTTACGCAGTTCAACCCAAAT
CACTACAGCTATTGCCGAATCCCCTACTTTCAAATGGCTGTCTCAGCAAATACCATCGAAAAGTACACACTGCTAGGCCCTTTCTTTCAGAATA
TCTCCTCGCAACAGGAAGTTACCAGGGAATACTTCAAGTGCGCCAAAAGACGATAGATAGGGCAGACATTTGCCACATCTCAAGATGCGTTACGATT
GACCTACAAAACCATCAAAAAGATTTACTTGTATATCATCAACCACTTTGTTCGAGCAAGTCCAATCGAAAAAGCAAAACCCCTGGATTGGTTTCG
CCTACATTTGTGAATCAAAAATCAAAAGCGTCGAGCACTTCAAGTACCCGAAAGAAGTGTCTTCTGATGGCTTTATGCACAATGTCACCTGTCGT
TCTAGATGGTCTTTGTGAGCCATTCATGGATACCACATTTCAAAAATTTGAAAGATTGATATTGATTATCTAAGACGTGCGCCTCGTGTAGATA
TCAAGGACGAGACCAAGTTGAACGCTGATGAGAAGGCTTCTGAGAAGTATTTATGAGGACACTGTTCTTGGCACTTCTAATTTTCATCTCTGAGGT
ATTCTTTCTGACATTGGCTGCTCATCATTTATGGTAGTGAAGCTCTTAATGCCACGCATAAGAGTCTGGAGAAAGACATCAAATATATTTCAAAG
CAATTGACTGCCGTTGAAGCA
```

```
>Bcin01g07220 (MLST1), partial sequence [organism=Botrytis cinerea, strain D11_T_WH08]
ATGGCATATCTTGTCTTTTTCGATTTATGCTTTGGAACGTGCTGGACAAGCTTGGGTTAGTGCTCTGCGCGTAGAAGCACAAAGAAGATTCT
CGACAACCGAAGTCATGGTTTGGAGAAATCCAGGAATTCACCTAGCCGTTGAACGAAGTTTTGGATAGGAACCTCTGAGGAAATGCGTAATCTC
```

```
GTGTCGCGCTTTGCTGGTATTGTATTTCACAGCATTTTTTATGCTATTGATATCAATCATTGGGCTTTCGTGAATACATGGAACTGACATTAG
TCTCGATGGCAACTGGGCCAGTTATATACGCTGTACCCAAAACGTTCAATCGCGTGAGTGGAAAATGGGAAAACAAGTCAACTACGCCTCTGA
AATGACCACTGGCATATTTTCAGAGACGTTCTCCAACATCAAAGTGGTTCGGGCTTTTACTCTGGAACTTACTTTGAGACAAAACACACCCAAA
GCTACAGAAGAACTTTATAAAAGTTGGACTAATACGAGCAAACACTCTCGGGATTGCTGTGGGGATTGACAGATGCGATGTCATTTCTCATCACTG
CAACTATCTTTTATTATGCCACGGTCTCATTACCAAGAGAGAGATCAGTATCGCGACTGCACTACAGACTGTCAATCTTCTATTATTTGGTAT
TTCTAATAGTACGAATATGCTGGCCATGATACCACAAAATCAACTCTTCTCGCGTTACAGTACGCATATGCTTGCATTAGCCAATCTCGATTCA
TCTTCTCCCACGAAAAATAAAGGAACCGAACGGCTTTTCGACAATCTTTCCAATCAAATTCACCCGCTTTTCATTACATACCCCTACTCGTCTG
AAAAACGAACGATATCATCTTTTCTCTTTCCCTGATTCTAACTCAACAACGCACTTGTTCGGACCCCTCCGGCTCCGAAAAATCTACAATAGC
TGCTCTGCTCATTGGTCTCTATCCGCCAGATACTTCAACACCTCCACCGTTGACATTCAATCGCGTCTCCATAAGTAACTGTCACATTCCGTCT
CTCCGGGCTTCTCTCTCACTCGTTCACAAAATACCGATTCTATTTCCAGCTACCATTCTCCATAACATCATTTATGGTCTCCAGAATCTTCTC
CTTGTGCTAGTCTTCCATCTGCTATTGCATCAGCAAAAAGATGCTGGGATCCATGAATTTATCACATCGCTTCCACAAGGTTATGATACTAT
```

```
>Bcin05g07690 (MLST2), partial sequence [organism=Botrytis cinerea, strain D11_T_WH08]
ACCCTATACCAAGTCTTTTCTGCACTTTCTCATCAAAAACGAACGAGAATCATCAATAAAATACTTTGCTGAAGTAATTGGGTTTTATT
TTGGCCAGGATGCCTTCTCTCTACGACAGCAAGCCTTCGATGATATGTTGTGGGTAGTTCTTGGCTGGCTGGATACTGTCAAATTCATTGATTT
ACATTCTGAATTGCACTATTCAAACGACTCTCAGCCAGAATGGTACGACAACAATATAAACCTGCATTTGCACATCGAGCGCGACTATTTTGG
GAATTGGCTTCAACAAGGATGGGATACTACTCTCTGTGGTGGTGGGATGATATGGTCACCATACTTACTCCATACAAGAACGCAATTACCAATG
AACTCTATATCGCAGCTTCGATATCGATGTACCTATATTTCCCGGAGATGACAATCAATCCCCATTTATGCTTTCCAACCCCTCGTATCCACC
TCACGATCCGAAATATCTACAGGCAGCTGTTGATGCTTACAAATGGCTGAATGGTTCCAACATGACGGATTTGCAAGGATTATATGTCGACGGG
TACCATATCTCGAATCTTTCTGGCGGTGAAAACACCCATTTGCGATTCTAGAAATGAGATGGTATATACTTACAATCAAGGTGTTTTGCTTACTG
GACAACGTGGTTTTGTATGACGCAACCGCCGACGATCATACTTGTAGATGGCCACAACTCATCGGAATGTTATTAATGCCACAGGCTATGA
CCTGAAAACACAATGTTGTCTATCTACCGCCACCCAAAAGATGGTTCCGCATTGGCAAAGTGGTTTTGGCTGGGTAGGAATGGAATACGGAAGAA
GGATGCGATTCAAGTCTTCGTGTTCTCAAAAATGGACAAAATTTCAAAGGCATATTTCTTTCATCACTTGATTGCGTCTGTAGTGATTGGCCAG
GGGAGCCTATTGCAGGGACGAAGGAAAGCTTAGAACTCGACAGAGTGTGGCATTCTGACAAAATGCTCACAGTATAACAAAAT
```

```
>Bcin06g01710 (MLST3), partial sequence [organism=Botrytis cinerea, strain D11_T_WH08]
GGTGAGTCTGACTTTTGTATTTGAGCGTTAAGATAGACACTGATATACCAAGGCAATCACCTAATTTTCATGGCGTTCCTCCCTGCATCATCTAC
CTACCCCTGGAATGCTGGGAGAATTATACTCAGCAGCTTTTACAGCACCTGCTTTCAATTTGGATCTGTTCCCTGCTGTGACAGAATTTGGAGACG
GTTGTAATGGATTGGCTGGCCAAGCTTCTCAATCTCCCAGACTGTTATTTGTCTTCGACTCATGGTGGTGGTGTATCCAAGGATCAGCCTCGG
AAGCTATCGTTACCCTTATGGTTGCTGCCCAGGATAAATATCTTCTGTAACACTACTGAAGGTCTGTGCGGCATTGAACTCGAGGATGCGATTGC
ATATAAGAGGAGTAAGCTAGTTGCACTAGGAAGCGAAATGGCACACAGCTCCACGCAGAAAGCAGCGCAAATAGCTGGCGTTAGATTCCGATCG
ATTCCAGTACTCGCATCCAATGATTTCCGCATGACGGGTGATGATTTAGAGAAGGATTTGAAAGAATGCAAATCTCAAGGATTTGGAACCCCTTCT
ATCTAACTTCGACTTTGGGAACAACATCTACATGCGCAGTTGACGACTTCGCATCTATTTGCAACAGTACTTTCAAAAATATGCACCTCCAGATGT
TGCAGGCGAGATCTGGGTTACGTCGATGCTGCTTATGCAGGTGCAGCTTTGGTTTTGCCCTGAATACCATCATCTAACATCGTCTTCCAGCAT
TTCCATTCCTTCGATATGAACATGCACAAAATGGCTTCTGACAAAATTTGACGCTTCTTGTCTATATGTCAAGAAACGCAAAGATCTGATCGATG
CACTCTCCATAACACCAAGTTATCTTCGCAACGAGTTTTCAGAGAGTGGACTCGTAACCGACTATCGGGACTGGCAAATTTCTCTCGGAAGACG
CTTCCGAAGCTTAAAGATTTGGTTTTGTCTCAGAACCCTACG
```

```
>Bcin09g03030 (MLST4), partial sequence [organism=Botrytis cinerea, strain D11_T_WH08]
ACCCTTCAACCCACCGCAGCTCCTATACCGAAAAGCGAGTATCCTACCAATTTCTCTTCCACCTGCGACTTTAAGACCATTGGCTTTCCGCACT
TTCACAAAAAAGCATAGTTTAAACATTGACGTCGTCGGCATTACAAGTGTGGCTACTTTTATTGGAAAGCATTTGTGGGACAGGATGGAGGGAAG
AAGGACTGGCAGAGAGAGTCTTGGAGGAGTTCGCAAGAGTTGGAAGAATAGGAGTGGCGGTGTCAATTTGTCGAGGGCAGGGAACGGAATTTGAA
GGAGATTCTGAAAGCTTTGGAAGGGAATATGAGTGGTGGAAAGGATAGTCAATAGGAAGAGAGCTAAGCCGGCAGAATAGTTTAGTACTGGGATCA
TCACAATATGGAGAGGTCATATACAAAGACTTTGGGCTACGGCCAGGGAATATACCCAGAGAGGATAGTCAAGTCAAGTTTGGGAATGTCAACGT
TGGAGGTCAATGACGAGGAAGATGAGGATGGCCTGATGGATCCAAGAAGTGGTTAAAAGTCATTGATGCATTTGAGCAACCTCGACTGGTGTGTA
CAATGTTGCTAAAAAGCACTTTGATAGGTATGTTTCAATGATAAAAATTTTATCTGAATCGACTAACTCAGTACAGAGATACTCCAAACCTTCA
TTGTTCCACCTGCGTCTCATAAAACACTCCTCTTCCAAAACCGCTATAATGTTATCCATCAACGCTCTCCTTCGCAATGAATCTTTTCAAACGC
CCGCTTTTCAAGGTGGCAAATCTTCCCTTCAACGCAGCAGCTCCGCCATTACCACCAACAACAATCATACAAATTAACGCCGATAGCTAATCT
TCTCGGTGCAATCGCAGCTCTCATATGCTTCTCGTCTCCTCAGTATTTACCCACTGGTACCCTCGCCATCAATGACCTGACGGGCAGTATC
GCTCTCGATCTTACACACGCAGCAGCCATTC
```

```
>Bcin11g01310 (MLST5), partial sequence [organism=Botrytis cinerea, strain D11_T_WH08]
ACTGACATGGACCTCATGTGAAACCGCGTAGAATGCGCAACGCTTGAAGTTCGCTCGAATATGGCGATGCAACGTCAACGGCAAAGCCAGT
GTTGCGCTTGCTCGTTATCTGCCACTGTTGCCGCGAGCAAGAAGCTCGGGTCTCTCTTGATAAAACCCGGTGGACCCGGTGCCCTCGGTGTTG
GCTTTGTGCACTGAGAGCCGGTGCCGCCGCTCGACACTGAGTGGTGGATTGTACGATATCATCGGATGGGATCCACGTGGAACCGGTGCTTC
GGCTCCTATTTTGGAAATGTTTTGCAAATGCCAGTGGGAGTATGATTTTAAACAACGCTTTCCATCTGCTCCGAATCTCTGGCTCGGACAATTT
GCGAATGCCAGCGCAAATTTGCTGTTAGTCTGCTATCACATCTTTGACACTTCTGTGCTGCTCTTGGAAAAGCTTGGCTGGCTCAGAAAT
```

```
CTCCCGCTCTTTACACCTCAACAGCAGCATATGTTGCTCGAGACATGGCAGCGATAGTTCGATGCATTGGATGGGACCTCTGCAAACTTAACTA
CTGGGGTTTCTCATATGGAACATTTTCTAGCTGAGTTTATCCAACTTTCCAGGCCGTGTGGGAAGAGTTCTTGCCGATGGTGTTCGAC
GCAAAGGCAAATGCACTCACATACGTTAGCCAACCTCCCAACGATCAACTCAGTGTTCGTGCTTCGTTGAACGATTTTGCAGCTTCTGCACCA
CCGCCGGTAGTAAAAGTTGCTCTTTTGGCACCCGCCCTACTGGAACCTCAGGTAAGTGTGCTACCAGACTGGACAACATAATGAAGGATATGTT
CCTCAATCCTATTGTTGCTTCGGGCTTAAGCATCA
```

```
>Bcin15g03910 (MLST6), partial sequence [organism=Botrytis cinerea, strain D11_T_WH08]
TCGCCAAAACACAAAATCATCCAACGATGAAGATGATACTCCACTTCCCTTGATTATCTGGCATGGACTCGGCGATAATTACAAAGCGGATGGT
CTTGCGCAAGTTGGAAAAGTAGCTGAAGCTATTCATCTGGGACTTTTGTCTACAATATTCATGTAGATGAGGATGCATCTGCAGATAGGACAG
CTACCTTCTTTGGAAAATCTCACTCGTGAGTACATCCCTATTTTTCCTTTAAATATCATACTAACTCTCTTACCAAGTTCAAATCGAAAAGGTC
TGCGAAGACCTCGCCTCCCATCCTATTCTCTCTACCAGCGCCCGCGTGCAGCCAATGGATTCTCCCAAGGCGGCCAATTTCTGCGTGGTTACA
TATCCCCTGCAATGCTCCACCCATCCGCTCTCTCTGACCTTCGGTTCCCAACACAACGGCATTCTGCCTTCCAAGCCTGTGGTCTGCCGA
TTTCTCTGTGCGGGTGTCAAACCTTTTGGGATCCAACACCTGGTCAACCTTTGTCCAATCTCGTCTCGTACCCGCTCAATACTTCAGAGAT
CCGGAACCTTAGACTCTTACCTTGAATATCCAATTTCTTGGCGACATCAATAATGAGCGCGTTCTCAAGAACCAAACATATAAATCCAACA
TGAAAAAATTGGAACGATTTCGTAATGTATGTCTTTGAAAGACGATACAACCTGTCATCCCTAAGGAAAGTGGATGGTGGGCTGAAGTCAACGGCAC
GGAAGTTACACCACTGAAAGAAAGAGCCATTTATAAAGAAGATTGGCTAGGTTTAAAGACATTTGGATGAGGCCGAAAATTAGTTTTCGAAACC
ATTCCAGGGGGACATATGACGTTAGGAGAGGAGATGCTAGAGAAGGCTTTCAAAGAGTATTTTGGTCCAGCAGGGAAGAAAATTTGGG
```

```
>Bcin16g03460 (MLST7), partial sequence [organism=Botrytis cinerea, strain D11_T_WH08]
ATGAACCTCTTGATTTGAACTCTTCATTAATTGCAAGTGATGAACCCCTATTTCTGCCAGAGGATAGTTACAAGACGTATATCATTTAGTCGAGA
ACCCTCATGATATATATGACGGGTTTTTGGAGCGAATGAAAGTAAACATTTGGTTGATGTTAGGTGTGTTATTTATTTCTGATGAAATGAAC
AAGAGAGACTGATGAGATAGTGAGCCGCTTTATGAACCGTCAACTGTTTCTCACGGACAGGAAGTTACCATTGATCCTTCAGTTCCGGAATTTCTG
AAGTGGCGGTTTTAGAGAGGGATGAGGTGGTCAGGTGTATTGAGCATAGAGCGAGGGCATTTCAGGGGTGGAGGGGCGAGATGGGGATTGAGAA
GTTGAGGACGCAGAGGTATGGGGTTGGAGGACATTATGGGATGCATTTGTAAGTTTTGGGGATTGACGAAGCTTTTGTCTATTTTCTACCAG
TACGGATCTTGAAAAGAAAGATAGCATGAACACGAGGGCTAATAACTAGGAAAATAGCGATTGGAGCGGAGGTAACGTGGCATAGACCGATTTAG
TACTTTTCATGGTCTATGTGACGATATCCTCTGATATCGAAGGTGGAGGAACGGAATTTCCACGTATCGTGGGACCAAAAGGAGGAAGGTGGGAG
GACTTCTTGAAAACCTACGGAAGCATTGGATCCAAGAACTGGAGAAAATGTAACAGTAGAAGGGGTGACATTCAAACCAATCAAGGGAAATGCCG
TATTCTGGAAAATACTGACAACAACGGGAGGGGCTATGAT
```

```
>Bcin12g03020 (MLST8), partial sequence [organism=Botrytis cinerea, strain D11_T_WH08]
CGATTGGCTGCGAAGAAAAGTGCAGCAGCCGAGTACCCAAAAGCACGAATAAACCATCGGCAAGGAAAATATTCTCTGAACCACAACATGACA
CGAGCGCGAAGAGTATATCGGGCGAGAAAGCTTCATCAAGAGCACCAAAGCGACAACGAGTTCGATGATAAATTATAACTCTTACGGTGGAAAGAA
TGAAAATACAGCAGCTTATGCTTCCGGGAAAAGTTCCATCTGGAAGTATAAATGTTGGCGGAGGTAGGAAGACCCTTTTCAAGAAGAACCACGA
ACGGCATTGTGCTGCAAGTTGCCCTGGAAGTATCAACATTTGGTGGAAAAGAAGGCTACCCAAATCGAGGACGAGGGTAGAGCAGCTTATGC
TTCCGAAAATTTGCTCCAGGAAGTATAAATCTTGGCGCAAAGAAGGCGATTTCATTTCCAAGATGAAACGAGACCAGGCTTATGTCTCCGAAAG
CTTCCACATGGTAGTATCGACGGTATGCGAAAACCGTGAATGGCTGCCGTCCACCGCGAAAATGCTGAGGGTGGGAGGAAAACAGGCCAGGTTG
TCTCTTCTCTATTACATTCATCCTACTTCAAAGAAAAGCTTTTGTGTAACCCGAAAGAACAAGCGGAACCGGCAAAACCATCCAATGCGCCTTT
GACAGAGGAAATGGCGACTTTCACCAATCTAGGGTTATCGAGAAGGCTTGCAGCCCATCTATCGACTAACTCGATATGAAAGCTCCGACCGCC
ATTCAAAAGCATCTGTACAGCAGTTGGTATCGGACGATAGCGATGCTTTCATACAAGCAGAGACTGGATCTGGAAAACCTTTGGCATAATCTAC
TACCTATAGTCGAGCGAATATTAGCATTTGAGTGAGAAATGGCGTACAAA
```

```
>Bcin02g07770 (MLST9), partial sequence [organism=Botrytis cinerea, strain D11_T_WH08]
CAGCTTTCCCTTTCCGTTCTGGCATCTACAGTCAATGCCATCCCTACACCATCACAACCTTGAGTCTCGGGCCGTTATCGATTCCGATGCCGTTG
TAGGATTTGCCGAAAAGTGTCCAGTGGGACCGTAGGAACAGTTTATGAGGCATATAAACCATTCTTAAAGTCGTAAATGGATGCGTACCATT
CCCTGCCGTCGATGCATCGGGTAACACAGGGTATGTCTTATATCTTTCTCTTCCACACGATGCTATTGAGTCTCTAACATATTTTAGTGGTG
GTTTGTACCAACTGGCAGTAGCAATGGTGGTTGCAGCAGCAGTACCGGTCAAGTATATGTTTCGAGGAGGACAAAGCGGATCAAACCTACGCCAT
CATGTACTCTGGTAAGTTCTCTCTAAAATTTCTCTTATAGATCCAACCTAACAAAATCTTAGGTACATGCCAAAGGACGAGCCCTCAACCGGT
ATTGGTCAACGTCACGATTGGGAAGGTGTAATTTGCTGGCTCTCCAGCGCCACCGCCACAACCTGCCGACAACATCTTAGCCGTTTGTCTTCCG
CCCACGGAGGCTGGGATTTGTTCCACGGATGGCTATTTCCCTTTCTGGTACCAGCCCTTTATCAAGTACGAAAAGTATCTGGCCCGTCGATCACTC
AATGGGTCTTACTAGTACTGTTGGTGGAAAACAACCTATGATTGCTTGGGAGTCTTTACCAACTGCTGCTCAAACCTGCTCTTGAGAACACCGAT
TTCGGTGTGCGAATGTTCCATTCAATTCGGGCTGTTTTACAGACAATCTT
```

```
>Bcin04g02090 (MLST10), partial sequence [organism=Botrytis cinerea, strain D11_T_WH08]
CGGAGGATGATATGGCAAAGTCTATGATTACCAAAGCATTTGTAGGCATGAGTAGTAACTGTCGAATATGACTATGAATGATGTTTACAAGCC
CTACATCCATGTAAGAAAATGTAGAATAGAGAGATCAGTAACTGGAACATAATATCGTTTTGTAGGCTTTCAAGTTACTTACGCAGTTCAACCCAAT
CACTACAGCTATTGCCGAATCCCCACTGTTCAAATGGCCGTCTCAGCAAATACCATCGAAAAGTACACACTGCTAGGCCCTTTCTTTCAGAATA
TCGCCTCTGCAACAGGAAGTTACCAGGGAATACTTCAGTGCGCCAAAGACGATAGATAGGCGACACATGCCACATCTCAAGATGCGTTACGAT
TGACCTTACAAAACCATCAAAAAGATTTACTTGTATATCATCAACCACTTTGTTTCGAGCAAGTCCAATCGAAAAGCAAACCCCTGGATTGGTT
```

```
CGCCTACATTGTGAATCAAAATCACAAAGCGTCGAGCACTTCAGGTAGACCCGAAAGAAGTGTCTTCTGATGGCTTTATGCACAATGTCACCTGTC
GTTCTAGATGGTCTTTGTGAGCCATTCATGGATACCACATTTCTCGAAAATTTCAAGATTGATATTGATTATCTAAGACGTGCGCCTCGTGTAG
ATATCAAGGACGAGACCAAGTTGAACGCTGACGAGAAAGGCTTCTGAGAAATATTATGAGGACACTGTTCCCTGGCACTTCTAATTTTCATCTCTGA
GGTCTTCTTTCTCACATTGGCTGCTCATCATTATGGTAGTGAAGCTCTTAATGCCACGCATAAGAGTCTGGAGAAAGACATCAAATATATTTCAA
AAGCAATTGACTGCCGTTGAAGCA
```

```
>Bcin01g07220 (MLST1), partial sequence [organism=Botrytis cinerea, strain D12_BH20_4]
ATGGCATATCTTGTCTTTCTTTTCGCATTATGCTTTGGAACGTGCTGGACAAGCTTGGGTTAGTGCTCTGCGTGTAGAAGCACTAAAGAAGATTCT
CGCACAACCGAAGTCATGGTTTGAGGAATCCAGGAATTCACCTGGCCGGTTGAACGAAGTTTTGGATAGGAACCTGAGGAAATGCGTAATCTC
GTTGGCCGCTTTGCTGGTATTGTATTCACAGCATTTTTTATGCTATTGATATCAATCATTTGGGCTTTTTGTGAATACATGGAAACTGACATTAG
TCTCGATGGCAACTGGGCCAGTTATATACGCTGTCACCAAAAACATTCAAATCGCGTGAGTGGAAAATGGAAAACAAGTGCAACTACGCCTCTGAA
ATGACCCTGGCATAATTCAGAGACTTTCTCCAACATCAAAGTGGTTCGGGCTTTTACTCTGAAAACCTACTTTGAGACAAAACACACCAAAGC
TACAGAGGAACCTTATAAAGTTGGACTAATACGAGCAAACCTACTCGGGATTGCTGTGGGATTGACAGATGCGATGTCATTCCTTCATCAGTGA
ACTATCTTTTATTATGCCACGGTCTCATTTACCAAGAGAGAGATCAGTATCGCGACTGCACCTACAGACTGTCAATCTTCTATTATTTGGTATTT
CTAATAGTACGAATATGCTGGCCATGATACCACAAAATCAAATCTTCTCGCGTTACAGCTACGCATATGCTTGCATTAGCCAATCTCGATTATC
TTCTCCCACGAAAATAAAGGAACCGAACGGCTTTGACAATCTTTCCAATCAAATTCACCGTCTTTTCAATTCACATACCCCTACTCGTCCGTGAA
AAACGAACGATATCATCTTTCTCTTTCCCTGATTCCTAACTCAACAACTGCATTTGTCGGACCCCTCCGGTCCGGAAAATCTACGATAGTTG
CTCTGCTCATTGGTCTCTATCCGCCAGATACTTCAACACCTCCACCGTTGACATTCAAATCGCGTCTCCATAAGTAACTGTCACATTCGGTCTCT
CCGGGCTTCTCTCTCACTCGTTCCACAAAATACCGATTCTATTCAGCTACCATTCTCCATAACATCATTTATGGTCTCCAGAATCTTCTCCTT
GTGCTAGTCTTCCATCAGCTATTGCATCAGCAAAAGATGCTGGGATCCATGAATTTATCACATCGTCTCCACAAGGTTATGATACTAT
```

```
>Bcin05g07690 (MLST2), partial sequence [organism=Botrytis cinerea, strain D12_BH20_4]
ACCACTATCACCAAGTCCTTTTCTGCACTTTCCCTCATCAAAAACGAACGAGAACATCATCAATAAAATACTTTGCTGAAGTAATTGGGTTTTATT
TTGGCCAGGATGCCTTCTCTACGACAGCAAGCCTTCGATGATATGTTGTGGGTAGTTCTTTGGCTGGCTGGATACTGTCAAATTCATTGATTT
ACATTCTGAATTGCACTATTCAAAACGACTCTCAGCCAGAAATGGTACGGACAACAATATAAACCTGCATTTGCACATCGAGCGGACTATTTTGG
GAATTGGCTTTCACAAGGATGGGATACTACTCTCTGTGGTGGTGGGATGATATGGTCACCATACTTACTCCATAACAAGAACGCAATTACCAATG
AACTCTATATCGCAGCTTCGATATCGATGTACCTATATTTCCCCGGAGATGACAATCAATCCCCATTTATGCTTTCCAACCCCTCATATCCACC
TCAGATCCGAAATATCTACAGGCAGCTGTTGATGCTTACAAATGGCTGAATGGTTCCAACATGACGGATTTACAAGGATTTATATGTCGACGGG
TACCATATCTCGAATCTTTCTGGCGGTGAAAAACCCCATTCGCGATTCTAGAAATGAGATGGTATATACCTACAATCAAGGTGTTTTGCTTACTG
GACAACGTGGTTTTGTATGACGCAACC GCCGACGATCATACCTTGTAGATGGCCACAACTCATCGCAATGTTATTAATGCCACAGGCTATGA
CCTGAAACACAATGTTGTCATCTCACCGCCACCCAAAGATGGTTCCGCATTGGCAAAGTGGTTTTGGCTGGGTAGGAATGGAATACTGGAAGAA
GGATGCGATTCAAGTGCTTCGTGTTCTCAAAAATGGACAAAATTTCAAAGGCATATTTCTTTTCATCACTTGAATTGCGTTCGTAGTGAATTTGCCAG
GGGAGCCTATTGCAGGGACGAAGGAAAAGCTTAGAACTCGACAGAGTGTGGCATTCTGACAAAATGCTCACAGTATACAAAATG
```

```
>Bcin06g01710 (MLST3), partial sequence [organism=Botrytis cinerea, strain D12_BH20_4]
GGTGAGTCTGACTTTTGTATTTGAGCGTTAAGATAGACTGATATACCAAGGCAATCACCTAATTTTCATGGCGTCTTCCCTGCATCATCTAC
CTACCCTGGAATGCTGGGAGAATTATACTCAGCAGCTTTCACAGCACCTGCTTTCAATTTGGATCTGTTCCCTGCTGTGACAGAATTGGAGACG
GTTGTAATGGATTGGCTGGCCAAGCTTCTCAATCTCCAGACTGTTATTTGTCTTCGACTCATGGTGGTGGTGTATCCAAGGATCAGCCTCGG
AAGCTATCGTTACCGTTATGGTTGCTGCCCGGATAAATATCTTCGTGAAACTACTGAAGGTCTGTCCGGCATTGAACTCGAGGATGCGATTGC
ATATAAGAGGAGTAAGCTAGTTGCACTAGGAAGCGAAAATGGCACACAGCTCCACGCAGAAAGCAGCGCAAATAGCTGGCGTTAGATTCCGATCG
ATTCCAGTACTCGCATCCAATGATTTTCGCCATGACGGGTGATGATTTAGAGAAGGTATTGAAAGAATGCAAATCTCAAGGATTTGGAACCCCTCT
ATCTAACTTCGACTTTGGGAACAACATCTACATGCGCAGTTGACGACTTCGCATCTATTGCAACAGTACTTTCAAAAATATGCACCTCCAGATGT
TGCAGGCGAGATCTGGGTTACGCTGATGCTGCTTATGCAGGTGCAGCTTTGGTTTTGCCCTGAATACCATCATCTAACATCGTCTTTCCAGCAT
TTCCATTCCCTTCGATATGAACATGCACAAAATGGCTTCTGACAAAATTTTCGACGCTTCTTGTCTATATGTCAAGAAACGCAAAGATCTGATCGATG
CACTGTCCATAACACCAAGTTATCTTTCGCAACGAGTTTTTCAGAGAGTGGACTCGTAACCGACTATCGGGACTGGCAAATTCCTCTCGGAAGACG
CTTCCGAAGCTTAAAGATTTGGTTTTGTCTCAGAACCTAC
```

```
>Bcin09g03030 (MLST4), partial sequence [organism=Botrytis cinerea, strain D12_BH20_4]
ACCCCTCAACCCACCGCAGCTCCTATACCGAAAGCGAGTATCTTACCAATTTCTCTTCCACCTGCGACTTTAAGACCATTGGCTTTCCGCACT
TTCACAAAAAAGCATAGTTTAAACATTTGACGTCGTCCGCATTACAAGTGTGGCTACTTTTTATTGGAAAGCATTTGTGGGACAGGATGGAGGGAAG
AAGGACTGGCAGAGAGAGTCTTGGAGGAGGTCGCCAAGAGTTGGAAAGAATAGGAGTGGCGGTGTCAATTGTTCGAGGGCGAGGGAACGGAATTTGAA
GGAGATTCTGAAAGCTTTGGAAGGGAATATGAGTGGTGGAAAGGATAGTTCATAGGAAGAGAGCTAAGCCGGCAGAATAGTTTAGTACTGGGATCA
TCACAATATGGAGAGGTCAATCATAACAAGACTTTGGGCTACGGCCAGGGAATATACCCAGAGAGGATAGTCAAGTGTGGGAATGTCAACGT
TGGAGGTCAATGACGAGGAAGATGAGGATGGCCTGATGGATCCAAGAAGGTGGTTAAAAGTCAATGATGCAATTTGAGCAACCTCGACTGGTGTGA
CAATGTTGCTAAAAAGCACTTTGATAGGTATGTTTCAATGATAAAAATTTTCATCTGAATCGACTAACTCAGTACAGAGATACCTCCAAACCTTCA
TTGTTCCCACCTGCGTCTCATAAAAACCTCCTCTTCCAAAACCGCTATAATGTTATCCATCAACGTCTCCTTTCGCAATGAATCTTTTCAAACGC
CCGCTTTTCAAAGGTGGCAAATCTTCCCTTCAACGCAGCAGCTCCGCCATTACCACCAACAACAATCATACAAATTAACGCCGATAGCTAATCT
```



TCTCGGTCGCAATCGCAGCTCTCATATGCTTCTCGGTCTCCTCAGTATTTACCCACTGGTACCCTCGCCATCAATGACCTGACGGGCAGTATC  
GCTCTCGATCTTACACACGCAGCAGCCATTC

>Bcin11g01310 (MLST5), partial sequence [organism=Botrytis cinerea, strain D12\_BH20\_4]  
ACTGACATGGACCTCATGTGGAACCGGCTAGAAATGCGCAACGCTTGAAGTTCCGCTCGAATATGGCGATGCAACGTCAACGGCAAAGCCAGT  
GTTGCGCTTGCTCGTTATCTGCCACTGTTGCCGCGAGCAAGAAGCTCGGGTCTCTTTGATAAACCCCGGTGGACCCGGTGCCCTCTGGTGTG  
GCTTTGTGAGTCTGGAGCCGGTGCCCGCTCTCGACACTGAGTGGTGGATTGTACGATATCATCGGATGGGATCCACGTGGAACCGGTGCTTC  
GGCTCCTATTTTTGGAATGTTTTGCAAATGCCAGTGCCGAGTATGATTTTTAACACGCGTTTCCATCTGCTCCGAATCTCTGGCTCGGACAATTT  
GCGAATGCCAGCGCAAATTTCTGCTGTTAGCTCTGCTATCACATCCTTTGACACTTCTGTGCTGCTCTTGCAAAAGCTTGCGTGGCTCAGAAAT  
CTCCCGCTCTTTACACCTCAACAGCAGCATATGTTGCTCGAGACATGGCAGCGATAGTCGATGCATTTGGATGGGACCTCTGCAAACTTAACATA  
CTGGGGTTTTCTCATATGGAACATTTTTCTAGCTGAGTTTATCCAACTTTCCCAGGCCGTGTGGGAAGAGTTCTTGCCGATGGTGTTCGAC  
GCAAAGGCAAATGCACTCACATACGTTAGCCAACCTTCCAACGATCAACTCAGTGTTCGTGCTTGGTGAACGATTTTGCAGCTTTCTGCACCA  
CCGCCGCTAGTAAAGGTTGCTCTTTTGCACCCGCCCTACTGGAACCTCAGTACTGTTGCTACCAGACTGGACAACATAATGAAGGATATGTT  
CCTCAATCCTATTGTTGCTTCGGGCTTAAGCATCA

>Bcin15g03910 (MLST6), partial sequence [organism=Botrytis cinerea, strain D12\_BH20\_4]  
TCGCCAAAACACAAAATCATCCAACGATGAAGATGATACTCCACTTCCCTTGATTATCTGGCATGGACTCGGCGATAAATTACAAAGCGGATGGT  
CTTGCGCAAGTTGGAAAAGTAGCTGAAGCTATTCATCTGGGACTTTTGTCTACAATATTCATGTAGATGAGGATGCATCTGCAGATAGGACAG  
CTACCTTCTTTGAAAATCTCACTCGTGAGTACATCCCTATTTTTTCTTTAAATATCATACTAACTCTCTTACCAAGTTCAAATCGAAAAGGTC  
TGCGAAGACCTCGCCTCCCATCCTATTCTCTTACCAGCGCCCGCTCGACGCAATTGGATTCTCCAAGGCGCCAATTTCTTGCGTGGCTACA  
TATCCCGCTGCAATGCTCCACCATCCGCTCTCTCTGACCTTCGGTTCCAACACACGGCATTCTGCTTCCAAGCCTGTGGTCCCTGCCGA  
TTTTCTCTGTGCGGGTGTCAAACCTTTTGCAGTCCAACACCTGGTCAACCTTTGTCCAATCTCGTCTCGTACCCGCTCAATACTTCAGAGAT  
CCGAAAACCTAGACTCTTACCTTGAATATTTCAATTTCTTGCCGACATCAATAATGAGCGCGTTCTCAAGAACCAAACATATAAATCCAACA  
TGAAAAAATTGGAACGATTCGTAATGTATGCTTTGAAAGCAGATCAACTGTCATCCCTAAGGAAAGTGGATGGTGGGCTGAAGTCAACGGCAC  
GGAAGTTACACCACTGAAAGAAAGAGCCATTTATAAAGAAAGATTGGCTAGGTTTAAAGACATTTGGATGAGGCCGAAAATTAGTTTTCGAAACC  
ATTCCAGGGGGACATATGACGTTAGGAGAGGAGATGCTAGAGAAGGCTTTCAAAGAGTATTTTGGTCCAGCAGGGAAGAAATTTGGG

>Bcin16g03460 (MLST7), partial sequence [organism=Botrytis cinerea, strain D12\_BH20\_4]  
ATGAACCTCTTGATTTGAACTCTTCATTAATTTGCAAGTGATGAACCCCTATTTCTGCCAGAGGATAGTTACAAGACGTATATCATTTAGTCGAGA  
ACCACCTCATGATATATATTGACGGATTTTTTGAAGCGAATGAAAGTAAACATTTGGTTGATGTTAGGTGTGTTATTTATTTCTGATGAAATGAAC  
AAGAGAGACTGATGAGATAGTGAGCCGCTTTATGAACCGTCAACTGTTTCTCACGACAGGAAGTTACCATTGATCCTTCAGTTTCGGAATTCCTG  
AAGTGGCGGTTTTAGAGAGGGATGAGGTGGTCAGGTGATTTGAGCATAGAGCGAGGGCATTTCAGGGGTGGAGGGGCGAGATGGGGATTGAGAA  
GTTGAGGACCGCAGAGGTATGGGGTTGGAGGACATTATGGGATGCATTTGTAAGTTTTGGGGGATTGACGAAGGCTTCTGTCTATTTTCTATCAG  
CACGGATCTTGAAAAGAAAGATAGCATGAACACGCGGGCTAATAACTAGGAAATAGCGATTGGAGCGGAGGTAACCGTGGCATAGACCGATTTAG  
TACTTTTATGATATATGTCGACGATCCTCTGATATCGAAGTTGGAGAACGGAATTTCCACGATTTGTGGGACCAAAAGGAGGAAGGTGGGAG  
GACTTCTTGAAAACCTACGGAAGCATTTGGATCCAAGAACTGGAGAAAATGTAACAGTAGAAGGGGTGACATTCAAACCAATCAAGGGAAATGCCG  
TATTCTGGGAAAATACTGACAACAACGGGAGGGGCTATGATG

>Bcin12g03020 (MLST8), partial sequence [organism=Botrytis cinerea, strain D12\_BH20\_4]  
CGATTGGCTGCGAAGAAAAGTGCAGCACCAGTACCCAAAAGCAGCAATAAACCATCGGCAAGGAAAATATTTCTCTGAACCACAACATGACA  
CGAGCGCGGAAGAGTATATCGGGCGAGAAGCTTCATCAAGAGCACCAAAGCGACAACGAGTCGATGATAATTATAACTCTTACGGTGGAAAGAAA  
TGAAAATACAGCAGCTTATGCTTCCGGGAACTTCCATCTGGAAGTATAAATGTTGGTGGAGGTAGGAAGACCACCTTTTCAAGAAGAACCACGA  
ACGGCATTGTGCTGTCGCAAGTTGCCCTTGGAAAGTATCAACATTTGGTGGAAAGAAAGGCTACCCAAATCGAGGACGAGGGTAGAGCAGCTTATG  
CTTCCGAAAATTTGCCCTCCAGGAAGTATAAATCTTGCGCAAAGAAAGGCGATTTCAATCCAAGATGAAACGAGACCGGCTTATGCTCTCCGAAA  
GCTTCCACATGGTAGTATCGACGGTATGCGAAACCGTGAAATGGCTGCCGTCCACCGCAAATTTGCTGAGGGTGGGAGGAAACCAGGCCAGGTT  
GTCTCTTCTTATTCACATTCATCTTCAAAGAAAATTTTGGATGAACCCGAAGAACAAAGCGGAACCGGCAAACCATCCAATGCGCCTT  
TGACAGAGGAAAATGGCGACTTTACCAATCTAGGGTTATCGAGAAGGCTTGACAGCCATCTATCGACTAAACCTCGATATGAAAGCTCCGACCGC  
CATTCAAAAGCATCTGTACAGCAGTTGGTATCGGACGATAGCGATGCTTTCATACAGCAGAGACTGGATCTGGAATAACTTTGGCATATCTA  
CTACCTATAGTCGAGCAATATTAGCATTGAGTGAGAATGGCGTACAAA

>Bcin04g02090 (MLST10), partial sequence [organism=Botrytis cinerea, strain D12\_BH20\_4]  
CGGAGGATGATATGGCAAAGTCTATGATTACCAAAGCATTTGTAGGCATGAGTAGTAAACTGTGCAATATGACTATGAATGATGTTTACAAGCC  
CTACATCCATGTAAGAAATGTAGAATAGAGAGATCAGTAACTGGAACATAATATCGTTTGTAGGCTTTCAAGTTACTTACGCAGTTCAACCAAT  
CACTACAGCTATTGCCGAATCCCCTGTTTCAAATGGCCGCTCTCAGCAAATACCATCGAAAAGTACACACTGCTAGGCCCTTTCTTTCAGAATA  
TCTCCTCTGCAACAGGAAGTTACCAGGGAATACTTCAGTGCGCCAAAGACGATAGATAGGCGACACATTTGCCACATCTCAAGATGCGTTACGAT  
TGACCTTACAAAACCATCAAAAAGATTTACTTGTATATCATCAACCACTTTGTTTCGAGCAAGTCCAATCGAAAAAGCAAACCCCTGGATTGGTT  
CGCTACATTTGTGAATCAAATCAAAAGCGTCGAGCACTTCAGGTAGACCCGAAAGAAAGTGTCTTCTGATGGCTTTATGCACAATGTCACCTGTC

GTTCTAGATGGTCTTTGTGAGCCATTTCATGGATACCACATTTCTCGAAAATTTTCGAAGATTGATATTGATTATCTAAGACGTGCGCCTCGTGTAG  
ATATCAAGGACGAGACCAAGTTGAACGCTGACGAGAAGGCTTCTGAGAAGTATTATGAGGACACTGTTCCCTGGCACTTCTAATTTTCATCTCTGA  
GGTCTTCTTTCTCACATTTGGCTGCTCATCATTTATGGTAGTGAAGCTCTTAATGCCACGCATAAGAGTCTGGAGAAAAGACATCAAATATATTTCAA  
AAGCAATTGACTGCCGTTGAAGCA

>Bcin01g07220 (MLST1), partial sequence [organism=Botrytis cinerea, strain D12\_E\_cal13]  
GATGGCATACTTTGTTTCTTTTCGCATTATGCTTTGGAACGTGCTGGACAAGCTGGGGTTAGTGTCTGCGTGTAGAAGCACTAAAGAAGATTC  
TCGCACAACCGAAGTCATGGTTTGGAGGTATCCAGAACTCACCTGGCCGGTTGAACGAAGTTTTGGATAGGAACTCTGAGGAAATGCGTAATCT  
CGTTGGCCGCTTTGCTGGTATTGTATTCACAGCGTTTTTTATGCTATTGATATCAATCATTGTTGGGCTTTCGTGAATACATGGAAACTGACATTA  
GTCTCGATGGCAACTGGGCCAGTTATATACGCTGTCACCAAAACGTTCAATCGCGTGAGTGGAAAAATGGGAAAAACAAGTGCAACTACGCCCTCG  
AAACGACCACTGGCATAATTTTCAGAGACTTTCTCCAACATCAAAGTGGTCCGGCTTTTACTCTGGAACTTACTTTGAGACAAAACACACAAA  
GCTACAGAAGAACTTTATAAAGTTGGACTAATACGAGCAAACACTACTCGGATTGCTGTGGGGATTGACAGATGCGATGTCATTCTTCATCACTGC  
AACTATCTTTTATTATGCCACGGTTCTCATTACCAAGAGAGAGATCAGTATCGCGACTGCACTACAGACTGTCAATCTTCTATTATTTGGTATT  
TCTAATAGTACGAATATGCTGGCCATGATACCACAAATCAACTCTTCTCGCGTTACAGCTACGCATATGCTTGCATTAGCCAATCTCGATTTCAT  
CTTCCCTCCACGAAAAATAAAGGAACCGAACGGCTTTTCGACAACTTTTCCAATCAAATTC AACCGTCTCTCATTCACATATCCTACTCGTCCCGA  
AAAACGAACGATATCATCCTTTTCTCTTTCCCTGATTCCCTAACTCAACAACGCACTTGTTCGGACCTCCGGCTCCGGAAAAATCTACAATAGCT  
GCTCTGCTCATTGGTCTCTATCCGCCAGATACTTCAACACCTCCACCGTTGACATTC AATCGCGTCTCCATAAGTAACTGTCACATTCGGTCTC  
TCCGGGCTTCTCTCTCACTCGTTCACAAAATACCGATTCTATTTCCAGCTACCATTCTCCATAACATCATTTATGGTCTCCAGAATCTTCTCC  
TTGTGCTAGTCTTCCATCAGCTATTGCATCAGCAAAAGATGCTGGGATCCATGAATTTATCACATCGCTTCCACAAGTTATGATACTATG

>Bcin05g07690 (MLST2), partial sequence [organism=Botrytis cinerea, strain D12\_E\_cal13]  
ACCACTATCACCAAGTCCTTTTCTGCACTTTCCCTCATCAAAAAACGAACGAGAACATCATCAATAAATACTTTGCTGAAGTAATGGGTTTTATT  
TTGGCCAGGATGCCCTTCTCTCTACGACAGCAAGCCTTCGATGATATGTTGTGGTAGTTCTTGGCTGGCTGGATACTGTCAAATTCATTGATTT  
ACATTTCTGAATTGCACTATTCAAACGACTCTCAGCCAGAAATGGTACGGACAACAATATAACCTGCATTTGCACATCGAGCGGACTATTTTGGG  
AATTGGCTTACAAGGATGGGATACTACTCTCTGTGGTGGTGGGATGATATGGTACCATAACCTTACTCCATAACAAGAACGCAATTACCAATGA  
ACTCTATATCGCAGCTTCGATATCGATGTACCTATATTTCCCGGAGATGACAATCAATCCCCATTTATGCTTTCCAACCTTTCATATCCACCTC  
ACGATCCGAAATATCTACAGGCAGCTGTTGATGCTTACAAATGGCTGAATGGTTCCCACATGACGGATTTACAAGGATTATATGTCGACGGTAC  
CATATCTCGAATCTTTCTGGCGGTGAAAACACCCATTGCGATTCTAGAAAATGAGATGGTATATACTACAATCAAGGTGTTTTGCTTACTGGAC  
AACGTGGTTTTGTATGACGCAACCGCCGACGATCATACTTTGTAGATGGCCACAACTCATCGCGAATGTTATTAATGCCACAGGCTATGACCT  
GAAACACAATGTTGTCATCTCACCGCCACCCAAAAGATGGTTCCGCATTTGGCAAAGTGGTTTTGGCTGGGTAGGAATGGAATACTGGAAGAAGGA  
TGCGATTCAAGTGTTCGTGTTCTCAAAATGGACAACTTTCAAAGGCATATTTCTTTCATCACTTGATTGCGTTCTGTAGTGAATTTGCCAGGGG  
AGCCTATTGCAGGGACGAAGGAAAGCTTAGAACTCGACAGAGTGTGGCATTCTGACAAATGCTCACAGTATAACAAAAT

>Bcin06g01710 (MLST3), partial sequence [organism=Botrytis cinerea, strain D12\_E\_cal13]  
GTGAGTCTGACTTTTTTATTTGAGCATTAAAGATAGACACTGATATACCAAGGCAATCACCTAATTTTCATGGCGTCTTCCCTGCATCATCTACT  
TACCCTGGAATGCTGGGAGAATTTACTCGGCAGCTCTCACAGCACCTGCTTTCAATTTGGATCTGTTCCCTGCTGTGACAGAATTTGGAGACGG  
TTGTAATGGATTGGCTGGCCAAGCTTCTCAATCTCCAGACTGTTATTTGTCTTCGACTCATGGTGGTGGTGTATCCAAGGATCAGCCTCGGA  
AGCTGTCGTTACCGTTATGGTTGCCGCCCGGATAAATATCTTCGTGAACTACTGAAGTCTGTTCGGGCATTGAACTCGAGGATGCGATTGCA  
TATAAGAGGAGTAAGCTAGTTGCACTAGGAAGCGAAATGGCACACAGTTCCACGCAGAAAAGCAGCGCAGATAGCTGGCGTTAGATTCCGATCGA  
TTCCAGTACTCGCATCCAATGATTTTGGCCATGACGGGTGATGATTTAGAGAAGGTATTGAAAAGATGCAAATCTCAAGGATTTGGAACCTTCTA  
TCTAACTTCGACTTTGGGAACAACATCTACATGCGCAGTTGACGACTTTCGCATCTATTACAACAGTACTTTCAAATATGCACCTCCAGATGTT  
GCAGGCGAGATCTGGGTTACGTCGATGCTGCTTATGCAGGTGCAGCTTTGGTTTTGCCCTGAATACCATCATCTAACATCGTCTTCCAGCATT  
TCCATTCTTCGATATGAACATGCACAAATGGCTTCTGACAAATTTGACGCTTCTTGTCTATATGTCAAGAAACGCAAAGATCTGATAGATGC  
ACTCTCCATAACACCAAGTTATCTTCGCAACGAGTTTTTCAGAGAGTGGACTCGTAACCGACTATCGGGATTGGCAAATTCCTCTCGGAAGACGC  
TTCCGAAGCTTAAAGATTTGGTTTTGTCTCAGAACCCTAC

>Bcin09g03030 (MLST4), partial sequence [organism=Botrytis cinerea, strain D12\_E\_cal13]  
ACCCTTCAACCCACCGCAGCTCCTATACCGAAAGCGAGTATCCTACCAATTTCTCCTTCCACCTGCGACTTTAAGACCATTGGCTTTCCGCACT  
TTCACAAAAAAGCATAGTTTAAACATTGACGTCGTGCGCATTACAAGTGTGGCTACTTTTTATTGGAAGCATTGTGGGACAGGATGGAGGGAAGA  
AGGACTGGCAGAGAGAGTCTTGGAGGAGGTGCGCAAGAGTTGGAAGAATAGGAGTGGCGGTGTCATTGTGCGAGGGCGAGGGAACGGAATTTGAAG  
GAGATTCTGAAAAGCTTTGGAAGGGAATATGAGTGGTGGAAAGGATAGTCATAGGAAGAGAGCTAAGCCGGCAAATAGTTTGTAGTACTGGGATCAT  
CACAATATGGAGAGGTCAATCATACAAGACTTTGGGCTACGGCCAGGGAATATACCCAGAGAGGATAGTCAAGTTTGGGAATGTCAACGTT  
GGAGGTCAATGACGAGGAAGATGAGGATGGCTGATGGATCCAAGAAGTGGTTAAAAGTCAATTGATGCATTTGAGCAACCTCGACTAGTGTAC  
AATGTTGCTAAAAAGCACTTTGATAGGTATGTTTCAATGATAAAAATTTTATCTGAATCGACTAACTCAGTACAGAGATACCTCCAAACCTTCAT  
TGTTCCCACTGCGTCTCATAAAAACACTCCTCTTCCAAAACCGCTATAATGTTATCCATCAACGTCCTCTTCGCAATGAATCTTTTCAAACGCC  
CGTTTTTCAAAGTGGCAAATCTTCCCTTCAACGCAGCAGTCCGCCATTACCACCAACAACAATCATACAAATTAACGCCGATAGCTAATCTT  
CTCGGTGCAATCGCAGCTCTCATATGCTTCTCGGTCTCCTCAGTATTTACCCACTGGTACCCTCGCCATCAATGACCTGACGGGCAGTATCG

CTCTCGATCTTACACACGCAGCAGCCATTC

>Bcin11g01310 (MLST5), partial sequence [organism=Botrytis cinerea, strain D12\_E\_cal13]  
GGACTGACATGGACCTCATGTGGAACCGGCGTAGAATGCGCAACGCTTGAAGTTCGCTCGAATATGGCGATGCAACGTCAACGGCAAAGCCA  
GTGTTGCGCTTGCTCGTTATCCTGCCACTGTTGCCGCGAGCAAGAAGCTCGGGTCTCTCTTGATAAACCCCGGTGGGCCCGGTGCCCTCTGGTGT  
TGGCTTTGTGAGTCTGGAGCCGGTGCCCGCTCTCGACACTGAGTGATGGATTGTACGATATCATCGGATGGGATCCACGTGGAACCGGTGCT  
TCGGCTCTATTTTGGAAATGTTTTGCAAATGCCAGTGGGAGTATGATTTTAAACAACGCGTTTCCATCTGCTCCGAATCTCTGGCTCGGACAAT  
TTGCGAATGCCAGCGCAAATTTCTGCTGTTAGCTCTGCTATCACATCCTTTGACACTTCTGTCTGCTGCTTTGCAAAAGCTTGCCTGGCTCAGAA  
ATCTCCCGCTCTTTACACCTCAACAGCAGCATATGTTGCTCGAGACATGGCAGCGATAGTCGATGCATTGGATGGGACCTCTGCAAAACTTAAC  
TACTGGGGCTTCTCATATGGAACATTTTCTAGCTGAGTTTATCCAACTTTCCAGGCCGCTGGGAAGAGTTCTTGGCCGATGGTGTTCG  
ACGCAAAGGCAAATGCACTCACATACGTTAGCCAACTTCCCAACGATCAACTCAGTGTTTCGTGCTTTCGTTGAACGATTTTGCAGCTTTCTGCAC  
CACCGCCGGTAGTAAAGGTTGCTCTTTTGGCACCGCCCTACTGGAACCACAGTACTGTTGCTACCAGACTGGACAACATAATGAAGGATATG  
TTCTCAATCCTATTGTTGCTTCGGGCTTGAGCATCA

>Bcin15g03910 (MLST6), partial sequence [organism=Botrytis cinerea, strain D12\_E\_cal13]  
GCCAAAACACAAAATCATCCAACGATGAAGATGATACTCCACTTCCCTTGATTATCTGGCATGGACTCGGCGATAAATTACAAAGCGGATGGTCT  
TGCGCAAGTTGGAAAAGTAGCTGAAGCTATTCATCCTGGGACTTTTGTCTACAATAATTCATGTAGATGAGGATGCATCTGCAGATAGGACAGCT  
ACCTTCTTTGGAAAATCTCACTCGTGAGTACATCCCTATTTTTCCTTTAAATATCATACTAACTCTCTTACCAAGTTCAAATCGAAAGGGTCTG  
CGAAGACCTCGCCTCCCATCCTATTCTCTTACCAGCCCGCCGCTCGACGCAATGGATTCTCCCAAGGCGGCCAATTTCTTGCCTGGTTACATA  
TCCCCTGCAATGCTCCACCCATCCGCTCTCTCTGACCTTCGGTTCCCAACACAACGGCATTCTGCTTCCAAGCCTGTGGTCTGCCGATT  
TCCTCTGTGCGGGTGTCAAACCTTTTGGCATCCAACACCTGGTCAACCTTTTGTCCAATCTCGTCTCGTACCCGCTCAATACTTCAGAGATCC  
GGAAAACCTAGACTCTTACCTTGAATATTTCCAATTTCTTGGCGACATCAATAATGAGCGGCTTCTCAAGAACCACAAACATATAAATCCAACATG  
GAAAAATTGGAACGATTTCGTAATGTATGCTTTGAGACGACACAACACTGTATCCCTAAGGAAAGTGGATGGTGGGCTGAAGTCAACGGCACGG  
AAGTTACACCACTGAAAGAAAGAGCCATTTATAAAGAAAGATTGGCTAGGTTTAAAGACATTGGATGAGGCCGAAAATTAGTTTTTCGAAACCAT  
TCCAGGGGGACATATGACGTTAGGAGAGGAGATGCTAGAGAAGGCTTTCAAAGAGTATTTTGGTCCAGCAGGGAAGAAAATTTGGG

>Bcin16g03460 (MLST7), partial sequence [organism=Botrytis cinerea, strain D12\_E\_cal13]  
ATGAACCTCTTAATTTGAACTCTTCATATTTGCAAGTGATGAACCCCTATTTCTGCCAGAGGATAGTTACAAGACGTATATCATTTAGTCGAGA  
ACCACCTCATGATATACATTGACGGATTTTGGAAAAGCAATGAAAAGTAAACACTTGGTTGATGTTAGGTGTGTTATTTATTTCTGATGAAATGAAC  
AAGAGAGACTGATGAGATAGTGAACCCGCTTTATGAACCGTCTACTGTTTCTCACGGGCAGGAAGTTACCATTGATACTTCAGTTCGAAATTTCTG  
AAGTGGCGGTTTTAGAGAGGGATGAGGTGGTCAAGTGTATTGAGCATAGAGCGAGGGCATTTCAGGGGTGGAGGGGCGAGATGGGGATTGAGAA  
GTTGAGGACGAGAGGTATGGGGTTGGAGGACATTTATGGGATGCATTTGTAAGTTTTGGGGGATTGACGAAGGCTTTTGTCTATTTTCTACCAG  
TACGGATCTTGAAGAAAAGATAGCATGAACACGAGGGCTAATAACTAGGAAAATAGCGATTGGAGCGGAGGTAACCGTGGCATAGACCGATTTAG  
TACTTTTCATGGTCTATGTGACGATATCCTCTGATATCGAAGGTGGAGGAACGGAATTTCCACGTATTTGTGGGACCAAAAGGAGGAAGGTGGGAG  
GACTTCTGAAACTACGGAAGCATTGGATCCAAGACTGGAGAAAATGTAACAGTAGAAGGGGTGACATTCAAACCAATCAAGGGAAATGCCG  
TATTCTGGGAAAATACTGACAACAACGGGAGGGGCTATGAT

>Bcin12g03020 (MLST8), partial sequence [organism=Botrytis cinerea, strain D12\_E\_cal13]  
CGATTGGCTGCGAAGAAAAGTGCAGCACCAGTCAACAAAAGCACGAATAAACCATCGGCAAGGGAAAATTTCTCTGAACCACAACATGACA  
CGAGCGCGGAAGAGTATATCGGGCGAGAAGCTTCATCAAGAGCACAAAAGCGACAACGAGTCGATGATAAATTATAACTCTTACGGTGGAAAGAAA  
TGAGAATACAGCAGCTTATGCTTCCGGGAAAAGTTCATCTGGAAGTATAAATGTTGGTGGAGGTAGGAAGACCCTTTTCAAGAAGAACCCTCGA  
ACGGCATTGTGCTGCAAGTTGCCCTTGAAGTATCAACATTTGGTGGAAAGAAAGGCTACCCAAATCGAGGACGAGGGTAGAGCAGCTTATG  
CTTCCGAAAATTTGCCCCAGGAAGTATAAAGTCTGGCGCAAAGAAAGGCGATTTTCAATCAAGATGAAACGAGACCGGCTTATGTCTCTGGAAA  
GCTTCCACATGGTAGTATCGACGGTATGCGAAAACCGTGAATGGCTGCCGTCACCCGCGAAAATTTGCTGAGGGTGGGAGGAAACCAGGCCAGGTT  
GTCTCTTCTCTATTTCACATTCATCTACTTCAAAGAAAAGTTCGATGAACCCGAAGAACAAGCGGAACCGGCAAACCATCCAATGCACCTT  
TGACAGAGGAAAATGGGACTTTACCAATCTAGGGTTATCGAGAAGGCTTGCAGCCCATCTATCGACTAAACTCGATATGAAAGCCCCGACCGC  
CATTCAAAAAGCATCTGTGACGAGTTGGTATCGGACGATAGCGATGCTTTCATACAAGCAGAGACTGGATCTGAAAAAAGTTCGGCATATCTA  
CTACCTATAGTCGAGCGAATATTAGCATTGAGTGAGAATGGCGTACAAA

>Bcin02g07770 (MLST9), partial sequence [organism=Botrytis cinerea, strain D12\_E\_cal13]  
CAGCTTTCCCTTTTCGGTCTTGGCATCTACAGTCAATGCCATCCCTACACCATCACAACTTGAGTCTCGGGCCGTTATCGATTCCGATGCCGTTG  
TAGGATTTGCCGAAAAGTGTCCAGTGGGACCGTAGGAACAGTTTATGAGGCATATAAACCATTTCTTAAAGTCGTAAATGGATGCGTACCATT  
CCCTGCCGTCGATGCATCGGGTAACACAGGGTATGTCTTATGCCTTTCTCTTCCACACGATTGCTATTGAGTCTCTAACATATTTTAGTGGTG  
GTTTGTACCAACTGGCAGCAGCAATGGTGAATGCAGCAGCAGTACCGGTCAAGTATATGTTTCGAGGAGGACAAAGCGGGTCAAACACGCTAT  
CATGTAATCTGGTAAAGTTCTCTCTAAAAGTCTCTCTTTATAGATCCAACCTAACAAAGTCTTAGGTACATGCCAAAGGACGAGCCCTCAACCGG  
TATTGGTACCGTACGATTGGGAAGGTGTAATTTGCTGCTTCCAGCGCCACCGCCACAACCTGCCGACAACATCTTAGCCGTTTGTCTTCC  
GCCACGGAGGCTGGGATTGTTCCACGGATGGCTATTTCCCTTTCTGGTACCAGCCCTTATCAAGTACGAAAGTATCTGGCCCGTCGATCACT

CAATGGGTCTTACTAGTACTGTTGGTGGAAAAACAACCTATGATCGCTTGGGAGTCTTTACCTACTGCTGCTCAAACCTGCTCTTGAGAACACCGA  
TTTCGGTGTCTGCGAATGTTCCATTCAATCCGGCTGTTTTACAGATAATCT

>Bcin01g07220 (MLST1), partial sequence [organism=Botrytis cinerea, strain D12\_H\_BioH01]  
ATGGCATAATCTTGTCTTTTCGCATTATGCTTTGGAACGTGCTGGACAAGCTTGGGTTAGTGTCTCTGCGTGTAGAAGCACTAAAGAAGATTCT  
CGACAACCGAAGTCATGGTTTGAGGAATCCAGGAATTCACCTAGCCGGTTGAACGAAGTTTTGGATAGGAACCTGAGGAAATGCGTAATCTC  
GTTGGCCGCTTTGCTGGTATTGTATTACAGCATTTTTTATGCTATTGATATCAATCATTTGGGCTTTTGTGAATACATGGAAACTGACATTAG  
TCTCGATGGCAACTGGGCCAGTTATATACGCTGTCAACAAAACATTCATTCGCGTGAGTGGAAAATGGGAAAACAAGTGCAACTACGCCCTCTGA  
AATGACCACTGGCATAATTTTCAGAGACTTTCTCCAACATCAAAGTGGTTCGGGCTTTTACTCTGGAACTTACTTTGAGACAAAACACACAAA  
GCTACAGAAGAACTTTATAAAGTTGGACTAATACGAGCAAACTACTCGGGATTGCTGTGGGGATTGACAGATGCGATGTCATTTCTCATCCTG  
CAACTATCTTTTATTATGCCACGGTTCTCATTACCAAGAGAGAGATCAGTATCGCGACTGCACTACAGACTGTCAATCTTCTATTATTTGGTAT  
TTCTAATAGTACGAATATGCTGGCCATGATACCACAAAATCAACTCTTCTCGCTTACAGCTACGCATATGCTTGCATTAGCCAATCTCGATTCA  
TCTTCTCCACGAAAATAAAGGAACCGAACGGCTTTTCGACAATCTTTCCAATCAAATTCACCGTCTTTTATTACATACCCTACTCGTCTG  
AAAAACGAACGATATCATCTTTTCTCTTTCCCTGATTCCTAACTCAACCACTGCACCTTGTCCGACCCCTCCGGCTCCGAAAATCTACAATAGC  
TGCTCTGCTCATTGGTCTCTATCCGCCAGATACTTCAACACCTCCACCGTTGACATTCAATCGCGTCTCCATAAGTAACTGTCACATTCGGTCT  
CTCCGGGCTTCTCTCTCACTCGTTCCACAAAATACCGATTCTATTTCCAGCTACCATTCTCCATAACATCATTTATGGTCTCCAGAACTTCTC  
CTTGTGCTAGTCTTCCATCAGCTATTCATCAGCAAAAAGATGCTGGGATCCATGAATTTATCACATCGCTTCCACAAGGTTATGATACTAT

>Bcin05g07690 (MLST2), partial sequence [organism=Botrytis cinerea, strain D12\_H\_BioH01]  
ACCCTATCACCAAGTCTTTTCTGCACTTTCTTCATCAAAAACGAACGAGAACATCATCAATAAACTTTGCTGAAGTAAATGGGTTTTATT  
TTGGCCAGGATGCCTTCTCTCTACGACAGCAAGCCTTCGATGATATGTTGTGGGTAGTTCTTGGCTGGCTGGATACTGTCAAATTCATTGATTT  
ACATTCTGAATTGCACTATTCAAATGACTCTCAGCCAGAAATGGTACGGACAACAATATAAACCTGCATTTGCACATCGAGCGGACTATTTTGG  
GAATTGGCTTTCACAAGGATGGGATACTACTCTCTGTGGTGGTGGGATGATATGGTACCATATCTTACTCCATAACAAGAACGCAATTACCAATG  
AACTCTATATCGCAGCTTCGATATCGATGTACCTATATTTCCCGGAGATGACAATCAATCCCATTTATGCTTTCCAACCTTCATATCCACC  
TCACGATCCGAAATATCTACAGGCAGCTGTTGATGCTTACAAATGGCTGAATGGTTCCAACATGACGGATTTACAAGGATTATATGTCGACGGG  
TACCATATCTCGAATCTTTCTGGCCGTGAAAACACCCATTGCGATTTAGAAATGAGATGGTATATACCTACAATCAAGGTGTTTTGCTTACTG  
GACAACCGGTTTGTATGACGCAACCGCCGACGATCATACCTTGTAGATGGCCACAACTCATCGCAATGTTATTAATGCCACAGGCTATGA  
CCTGAAACACAATGTTGTATCTCACCTCCACCCAAAGATGGTTCGCAATGGCAAAGTGGTTTGGCTGGGTAGGAATGGAATACCTGGAAGAA  
GGATGCGATTCAAGTGCTTCTGTTCTCAAAAATGGACAAAATTTCAAAGGCATATTTCTTTTCACTTGTATTGCGTCTGTAGTATTGCCAG  
GGGAGCCTATTGCAAGGACGAAGGAAAGCTTAGAACTCGACAGAGTGTGGCATTCTGACAAATGCTCACAGTATACAAAAT

>Bcin06g01710 (MLST3), partial sequence [organism=Botrytis cinerea, strain D12\_H\_BioH01]  
GTGAGTCTGACTTTTGTATTTGAGCGTTAAGATAGACACTGATATACCAAGGCAATCACCTAATTTTCATGGCGTCTTCCCTGCATCATCTACC  
TACCCTGGAATGCTGGGAGAATTATACTCAGCAGCTTTTCACAGCACCTGCTTTCAATTGGATCTGTTCCCTGCTGTGACAGAATTTGGAGACGG  
TTGTAATGGATTGGCTGGCAAGCTTCTCAATCTCCAGACTGTTATTTGTCTTCGACTCATGGTGGTGGTGTATCCAAGGATCAGCTTCGGA  
AGCTATCGTTACCGTTATGGTTGCTGCCCGGATAAAATATCTTCGTGAACTACTGAAGGTCGTGCGGGCATTTGAACTCGAGGATGCGATTGCA  
TATAAGAGGAGTAAGCTAGTTGCACTAGGAAGCGAAATGGCACACAGCTCCACGCGAGAAAGCAGCGCAAATAGCTGGCGTTAGATTCCGATCGA  
TTCCAGTACTCGCATCCAATGATTTCCGCATGACGGGTGATGATTTAGAGAAGGTATTGAAAGAATGCAAATCTCAAGGATTGGAACCTTCTA  
TCTAACTTCGACTTTGGGAACAACATCTACATGCGCAGTTGACGACTTCGCATCTATTGCAACAGTACTTTCAAATATGCACCTCCAGATGTT  
GCAGGCGAGATCTGGGTTACGTCGATGCTGCTTATGCAGGTGCAGCTTTGGTTTGGCCCTGAATACCATCATCTAACATCGTCTTTCCAGCAT  
TCCATTCTTCGATATGAACATGCACAAAATGGCTTCTGACAAAATTTGACGCTTCTTGTCTATATGTCAAGAAAACGCAAAGATCTGATCGATG  
ACTGTCCATAACACCAAGTTATCTTCGCAACGAGTTTTTCAGAGAGTGGACTCGTAACCGACTATCGGGACTGGCAAATTCCTCTCGGAAGACGC  
TTCCGAAGCTTAAAGATTTGGTTTTGTCTCAGAACCCTAC

>Bcin09g03030 (MLST4), partial sequence [organism=Botrytis cinerea, strain D12\_H\_BioH01]  
ACCCTTCAACCCACCGCAGCTCTATACCGAAAGCGAGTATCTTACCAATTTCTCTTCCACCTGCGACTTTAAGACCATTGGCTTTCCGCACT  
TTCACAAAAAAGCATAGTTTAAACATTTGACGTCGTCGGCATTACAAGTGTGGCTACTTTTATTGGAAAAGCATTTGTTGGGACAGGATGGAGGGAAG  
AAGGACTGGCAGAGAGAGTCTTGGAGGAGGTCGCCAAGAGTTGGAAGAATAGGAGTGGCGGTGTCAATTTGTCGAGGGCGAGGGAACGGAATTGAA  
GGAGATTCTGAAAGCTTTGGAAGGGAATATGAGTGGTGAAGGATAGTCAATAGGAAGAGAGCTAAGTCGGCAAAAATAGTTTAGTACTGGGATCA  
TCACAATATGGAGAGGTCAATCATACAAGACTTTGGGCTACGGCCAGGGAATATACCAGAGAGGATAGTCAAGTCAAGTTTGGGAATGTCAACGT  
TGGAGGTCAATGACGAGGAAGATGAGGATGGCCTGATGGATCCAAGAAGTGGTTAAAAGTCAATTTGATGCAATTTGAGCAACCTCGACTAGTGTA  
CAATGTTGCTAAAAAGCACTTTGATAGGTATGTTTCAATGATAAAAATTTTATCTGAATCGACTAATCAGTACAGAGATACCTCCAAACCTTCA  
TTGTTCCACCTGCGTCTCATAAAAACCTCCTCTTCCAAAACCGCTATAATGTTATCCATCAACGTCTCCTTCGCAATGAATCTTTTCAAACGC  
CCGCTTTTCAAGGTGGCAAATCTTCCCTTCAACGCGACGCTCCGCCATTACCACCCAACAACAATCATACAAAATTAACGCCGATAGCTAATCT  
TCTCGGTGCGAATCGCAGCTCTCATATGCTTCTCGGTCTCCTCAGTATTTCAACCACTGGTACCCTCGCCATCAGTGACCTGACGGGCAGTATC  
GCTCTCGATCTTACACACGACGACGCCATT

>Bcin11g01310 (MLST5), partial sequence [organism=Botrytis cinerea, strain D12\_H\_BioH01]  
GACTGACATGGACCTCATGTGGAACCGGCGTAGAATGCGCAACGCTTGAAGTTCCGCTCGAATATGGCGATGCAACGTCAACGGCAAAAGCCAG  
TGTTGCGCTTGCTCGTTATCCTGCCACTGTTGCTGCGAGCAAGAAGCTCGGGTCTCTCTTGATAAACCCCGGTGGACCCGGTGCCTCTGGTGT  
GGCTTTGTGCAGTCTGGAGCCGGTGCCGCCGTCTCGACACTGAGTGGTGGATTGTACGATATCATCGGATGGGATCCACGTGGAACCCGGTGCCT  
CGGCTCCTATTTTGAATGTTTTGCAAAATGCCAGTGCAGGATGATGATTTTAAACAACGCGTTTCCATCTGCTCCGAATCTCTGGCTCGGACAATT  
TGCGAATGCCAGCGCAAAATCTGCTGTTAGCTCTGCTATCACATCCTTTGACACTTCTGTCGCTGCTCTTGCAAAAGCTTGCCTGGCTCAGAAA  
TCTCCCCTCTTTACACCTCAACAGCAGCATATGTTGCTCGAGACATGGCAGCGATAGTCGATGCATTGGATGGGACCTCTGCAAAACTTAACT  
ACTGGGGTTTTCTCATATGGAACATTTTTCTAGCTGAGTTTATCCAAACTTTCCAGGCCGTGTGGGAAGAGTTCTTGCCGATGGTGTTCGA  
CGCAAAGGCAAAATGCACTCACATACGTTAGCCAACTTCCCAACGATCAACTCAGTGTTCGTGCTTCGTTGAACGATTTTGCAGCTTTCTGCACC  
ACCGCCGGTAGTAAAGGTTGCTCTTTTGCCACCGCCCTACTGGAACCACAGGTACTGTTGCTACCAGACTGGACAACATAATGAAGGATATGT  
TCCTCAATCCTATTGTTGCTTCGGGCTTAAGCATCA

>Bcin15g03910 (MLST6), partial sequence [organism=Botrytis cinerea, strain D12\_H\_BioH01]  
GCCAAAACACAAAATCATCCAACGATGAAGATGATACTCCACTTCCCTTGATTATTTGGCATGGACTCGGCGATAATTACAAAGCGGATGGTCT  
TGCGCAAGTTGGAAAAGTAGCTGAAGCTATTCATCCTGGGACTTTTTGTCTACAATATTCATGTAGATGAGGATGCATCTGCAGATAGGACAGCT  
ACCTTCTTTGAAAATCTCACTCGTGAGTACATCCCCTATTTTCCCTTTAAATACCATACTAACTCTCTTACCAAGTTCAAAATCGAAAAGGTCTG  
CGAAGACCTCGCCTCCCATCCTATTTCTCTTACCAGCCCGCCGTCGACGCAATGGATTCTCCAAGGCCGCAATTTCTTGCGCGGTTACATA  
TCCCCTGCAATGCTCCACCCATCCGCTCTCTCTGACCTTCGGTTCCCAACACACGGCATTTCTGCTTCCAAGCCTGTGGTCTGCCGATT  
TCCTCTGTCGCGGTGCTCAAACCTTTTGCGATCCAACACCTGGTCAACCTTTGTCCAATCTCGTCTCGTACCCGCTCAATACTTCAGAGATCC  
GGAAAACCTAGACTCTTACCTTGAATATTTCAATTTCTTGGCGACATCAATAATGAGCGGTTCTCAAGAACCAAACATATAAAATCCAACATG  
GAAAAATTGGAACGATTGTAATGTATGCTTTGAAAGCAGATACAACCTGTCATCCCTAAGGAAAGTGGATGGTGGGCTGAAGTCAACGGCACGG  
AAGTTACACCACTGAAAAGAAAGAGCCATTTATAAAAGAAAGATTGGCTAGGTTTAAAGACATTGGATGAGGCCGAAAATTAGTTTTCGAAACCAT  
TCCAGGGGGACATATGACGTTAGGAGAGGAGATGCTAGAGAAGGCTTTCAAAGAGTATTTTGGTCCAGCAGGGAAGAAATTTGGG

>Bcin16g03460 (MLST7), partial sequence [organism=Botrytis cinerea, strain D12\_H\_BioH01]  
ATGAACCTCTTGATTTGAACTCTTCATTAATTTGCAAGTGATGAACCCCTATTTCTGCCAGAGGATAGTTACAAGACGTATATCATTAGTCGAGA  
ACCCTCATGATATATATTTGACGGATTTTTGAAAAGCGAATGAAAGTAAACATTTGGTTGATGTTAGGTGTGTTATTTATTTCTGATGAAATGAAC  
AAGAGAGACTGATGAGATAGTGAGCCGCTTTATGAACCGTCAACTGTTTCTCACGGACAGGAAGTTACCATTGATCTTTTCAGTTCCGAAATCTG  
AAGTGGCGGTTTTAGAGAGGGATGAGGTGGTCAAGGTGATTTGAGCATAGAGCGAGGGCATTTTCAGGGTGGAGGGGCGAGATGGGGATTGAGAA  
GTTGAGGACGCAGAGGTATGGCGTTGGAGGACATTATGGGATGCATTTGTAAGTTTTGGGGATTGACGAAGGCTTCTGTCTATTTTCTACCAG  
TACGGATCTTGAAAGAAAGATAGCATGAACACGAGGGCTAATAACTAGGAAATAGCGATTGGAGCGGAGGTAAACGTGGCATAGACCGATTTAG  
TACTTTTCATGGTCTATGTCGACGTATCCTCTGATATCGAAGGTGGAGGAACGGAAATTTCCACGTATTTGTTGGGACCAAAGGAGGAAGTGGGAG  
GACTTCTTGAAAATACGGAAGCATTTGGATCTAAGAAGTGGAGAAAAATGTAACAGTAGAAGGGGTGACATTCAAACCAATCAAGGGAAATGCC  
TATTCTGGGAAAATACTGACAACAACGGGAGGGGCTATGAT

>Bcin12g03020 (MLST8), partial sequence [organism=Botrytis cinerea, strain D12\_H\_BioH01]  
CGATTGGCTGCGAAGAAAAGTAGCGCAGCACCAGTCAACAAAAGCACGAATAAACCATCGGCAAGGAAATATTTCTCTGAACCACAACATGACA  
CGAGCGCGAAGAGTATATCGGGCGAGAAGCTTCATCAAGAGCACCAAAGCGACAACGATCGATGATAATTATAACTCTTACGGTGGAAAGAAA  
TGAAAATACAGCAGCTTATGCTTCCGGGAAACTTCCATCTGGAAGTATAAAATGTTGGTGGAGGTAGGAAGACCACCTTTTCAAGAAGAACCACGA  
ACGGCATTTGTCGCTGGCAAGTTGCCCCCTGGAAGTATCAACATTTGGTGGAAAGAAAGGCTACCCAAATCGAGGACGAGGGTAGAGCAGCTTATG  
CTTCCGGAAAATGCTCCAGGAAGTATAAACTCTGGCGCAAAGAAAGGCGATTTTCATTCGAAGATGAAACGAGACCCGGCTTATGCTCCGGAAA  
GCTTCCACATGGTAGTATCGACGGTATGCGAAAACCTGAAATGGCTGCCGTCCACCAGCAAATGCTGAGGGTGGGAGGAAACCAGGCCAGGTT  
GTCTCTTCTCTATTTACATTTCAATCTACTTCAAAGAAAATTTTATGATGAACCCGAAAGAAACGCGGAACCCGGCAAACCATCCAATGCGCCTT  
TGACAGAGGAAAATGGCGACTTTTACCAATCTAGGGTTATCGAGAAGGCTTGCAGCCCATCTATCGACTAAACTCGATATGAAAGCTCCGACCGC  
CATTCAAAAAGCATCTGTACAGCAGTTGGTATCGGACGATAGCGATGCTTTCATACAAGCAGAGACTGGATCTGGAAAAACTTTGGCATATCTA  
CTACCTATAGTCGAGCGAATATTAGCATTGAGTGAGAATGGCGTACAAA

>Bcin02g07770 (MLST9), partial sequence [organism=Botrytis cinerea, strain D12\_H\_BioH01]  
CAGCTTTCCTTTTCGGTCTTGCGATCTACAGTCAATGGCATCCCTACACCATCACAACCTGAGTCTCGGGCCGTTATCGATTCCGATGCCGTTG  
TAGGATTTGCCGAAACTGTTCCAGTGGGACCGTAGGAACAGTTTATGAGGCATATAAACCATTTCTTAAAGTCGTAAATGGATGCGTACCATT  
CCCTGCCGTGATGCATCGGGTAAACACAGGGTATGTCTTATATCTTTCTCTTCCACACGATTGCTATTGAGTCTCTAACATATTTTAGTGGTG  
GTTTGTACCAACTGGCAGTAGCAATGGTGGTTGCAGCAGCAGTACCGGTCAAGTATATGTTTCGAGGAGGACAAAGCGGATCAAACCTACGCCAT  
CATGTAATCCTGGTAAAGTTCTCTTAACTTCTCTTATAGATCCAACCTAACAAAATCTTAGGTACATGCCAAAGGACGAGCCCTCAACCGGT  
ATTGGTCAACGTCACGATTGGGAAGGTGTAATTTGCTGGCTTCCAGCGCCACCGCCACAACCTGCCGACAACATCTTAGCCGTTTGTCTTCCG  
CCCACGGAGGCTGGGATTGTTCCACGGATGGCTATTTCCCTTTCTGGTACCAGCCCTCTTATCAAGTACGAAAGTATCTGGCCCGTCGATCACTC  
AATGGGTCTTACTAGTACTGTTGGTGGAAAACAACCTATGATTGCTTGGGAGTCTTACCAACTGCTGCTCAAACCTGCTCTTGAGAACACCGAT  
TTCGGTGTGCGAATGTTCCATTCATTCGGCTGTTTTACAGACAATCT

>Bcin04g02090 (MLST10), partial sequence [organism=Botrytis cinerea, strain D12\_H\_BioH01]  
CGGAGGATGATATGGCAAAGTCTATGATTACCAAAGCATTTGTAGGCATGAGTAGTAAACTGTGCGAATATGACTATGAATGATGTTTACAAGCC  
CTACATCCATGTAAGAAAATGTAGAATAGAGAGATCAGTAACTGGAACATAATATCGTTTTGTAGGCTTTCAGTTACTTACGCAGTTCAACCCAAT  
CACTACAGCTATTGCCGAATCCCCACTGTTTCAAATGGCCGTCTCAGCAAATACCATCGAAAAGTACACACTGCTAGGCCCTTTCCTCAGAATA  
TCTCCTCTGCAACAGGAAGTTACCAGGGAATACTTCAGTGCGCCAAAGACGATAGATAGGCGACACATTGCCACATCTCAAGATGCGTTACGAT  
TGACCTTACAAAACCCATCAAAAAAGATTTACTTGATATCATCAACCACTTTGTTCGAGCAAGTCCAATCGCAAAAAGCAAAACCCCTGGATTGGTT  
CGCCTACATTGTGAATCAAAAATCACAAGCGTCGAGCACTTCAGGTAGACCCGAAAGAAGTGTCTTCTGATGGCTTTATGCGCAATGTCACCTGTC  
GTTCTAGATGGTCTTTGTGAGCCATTCATGGATACCACATTTCTCGAAAATTTCGAAGATTGATATTGATTATCTAAGACGTGCGCCTCGTGTAG  
ATATCAAGGACGAGACCAAGTTGAACGCTGACGAGAAGGCTTCTGAGAAGTATTATGAGGACACTGTTCCCTGGCACCTCTAATTTTCATCTCTGA  
GGTCTTCTTTCTCACATTTGGCTGCTCATCATTATGGTAGTGAAGCTCTTAATGCCACGCATAAGAGTCTGGAGAAAAGACATCAAATATATTTCAA  
AAGCAATTGACTGCCGTTGAAGCA

>Bcin01g07220 (MLST1), partial sequence [organism=Botrytis cinerea, strain D13\_MR\_S9]  
ATGGCATATCTTGTCTTTCTTTTCGCATTATGCTTTGGAACGTGCTGGACAAGCTTGGGTTAGTGCTCTGCGTGTAGAAGCACTAAAGAAGATTCT  
CGCACAAACCGAAGTCATGGTTTGAGGAATCCAGGAATTCACCTGGCCGTTGAACGAAGTTTGGATAGGAACCTGAGGAAATGCGTAATCTC  
GTTGGCCGCTTTGCTGGTATTGTATTCACAGCATTTTTTATGCTATTGATATCAATCATTTGGGCTTTCGTGAATACATGGAACTGACATTAG  
TCTCAATGGCGACTGGGCCAGTTATATACGCTGTCACCAAAAACGTTCAATCGCGTGAGTGGAAAATGGGAAAACAAGTGAACCTACGCATCTGA  
AATGACCACTGGCATATTTTTAGAGACTTTCTCCAACATCAAAGTGGTTCCGGGCTTTTACTCTGGAACCTTACTTTGAGACAAAACACACAAA  
GCTACAGAAGAACTCTATAAAAATTTGACTAATACGAGCAAACCTACTCGGGATTGCTGTGGGGATTGACAGATGCGATGTCATTTCTCATTCTG  
CAACTATCTTTTATTATGCCACGGTCTCATTACCAAGAGAGAGATCAGTATCGCGACTGCACTGCAGACTGTCAATCTTCTATTTATTTGGTAT  
TCCTAATAGTACGAATATGCTGGCCATGATACCACAAAATCAAATCTTCTCGCGTTACAGTACGCATATGCTTGCATTAGCCAATCTCGATTCA  
TCTTCTCCCACGAAAATAAAGGAGCCGAACGGCTTTCGACAATCTTTCCAATCAAATTCACAGTCTCTCATTACATATCCTACTCGTCCTG  
AAAAACGAACGATATCATCTTTCTCTTTCCCTGATTCCTAACTCAACAACTGCACTTGTGCGACCCTCCGGCTCCGAAAATCTACAATAGC  
TGCTCTGCTCGTTGGTCTCTATCCGCCAGATACTTCAACACCTCCACCGTTGACATTCAATCGTGTCTCCATAAGTAACTGTACATTTCCGCTC  
CTCCGGGCTTCTCTCTCACTCGTCCCACAAAATACCGATTCTATTTCCAGCTACCATTCTCCATAACATCATTTTATGGTCTCCCAGAATCTTCTC  
CTTGTGCTAGTCTTCCATCTGCTATTGCATCAGCAAAAAGATGCTGGGATCCATGAATTTATCACATCGCTTCCACAAGGTTATGATACTAT

>Bcin05g07690 (MLST2), partial sequence [organism=Botrytis cinerea, strain D13\_MR\_S9]  
ACCCTATCACCAAGTCCTTTTCTGCACTTTCCCTCATCAAAAACGAACGAGAACATCATCAATAAAATACTTTGCTGAAGTAATTGGGTTTTATT  
TTGGCCAGGATGCCTTCTCTCTACGACAGCAAGCCTTCGATGATATGTTGTGGGTAGTTCTTGGCTGGCTGGATACTGTCAAATTCATTGATTT  
ACATTCTGAATTGCACTATTCAAACGACTCTCAGCCAGAAATGGTACGGACAACAATATAAACCTGCATTTGCACATCGAGCGCGACTATTTTGG  
GAATTGGCTTTCACAAGGATGGGATACTACTCTCTGTGGTGGTGGGATGATATGGTCACCATACTTACTCCATACAAGAACGCAATTACCAATG  
AACTCTATATCGCAGCTTCGATATCGATGTACCTATATTTCCCCGGAGATGACAATCAATCCCCATTTATGATTTCCAACCCCTTCATATCCACC  
TCACGATCCGAAATATCTACAGGCAGCTGTTGATGCTTACAAATGGCTGAATGGTTCCAACATGACGGATTCAACAAGGATTATATGTCGACGGG  
TACCATATCTCGAATCTTTCTGGCGGTGAAAACACCCATTTGCGATTCTAGAAATGAGATGGTATATACCTACAATCAAGGTGTTTTGCTTACTG  
GACAACGTGGTTTTGTATGACGCAACC GCCGACGATCATACCTTGTAGATGGCCACAAACTCATCGCAATGTTATTAATGCCACAGGCTATGA  
CCTGAAACACAATGTTGTCATCTCACCGCCACCCAAAGATGGTTCCGCATTTGGCAAAGTGGTTTTGGCCTGGGTAGGAATGGAATACCTGGAAGAA  
GGATGCGATTCAAGTGCTTCGTGTTCTCAAAAATGGACAAAATTTCAAAGGCATACTCTCATCACCTTGATTGCGTTCTGTAGTGATTTGCCAG  
GGGAGCCTATTGCGAGGACGAAGGAAAAGCTTAGAACTCGACAGAGTGTGGCATTTCTGACAAAATGCTCACAGTATACAAAAT

>Bcin06g01710 (MLST3), partial sequence [organism=Botrytis cinerea, strain D13\_MR\_S9]  
GTGAGTCTGACTTTTGTGTTTGGAGCGTTAAGCTAGACACTGATGTACCAAGGCAATCACCTAATTTTCATGGCGTTCTTCCCTGCATCATCTACC  
TACCCTGGAATGCTGGGAGAATTATACTCAGCAGCTTTACAGCACCTGCTTTCAAATGGATCTGTTCCCTGCCGTGACAGAATTGGAGACGG  
TTGTAATGGATTGGCTGGCCAAGCTTCTCAATCTCCAGACTGTTATTTGTCTTCGACTCATGGTGGTGGTGTATCCAAGGATCAGCCTCGGA  
AGCTATCGTTACCGTTATGGTTGCTGCCCGGATAAAATATCTTCGTGAACTACTGAAGGTCTGTGCGGCATTGAACTCGAGGATGCGATTGCA  
TATAAGAGGAGTAAGCTAGTTGCACTAGGAAGCGAAATGGCACACAGCTCCACGCGAAAAGCAGCGCAGATAGCTGGCGTTAGATTCCGATCGA  
TTCCAGTACTCGCATCCAATGATTTCCGCATGACGGGTGATGATTTAGAGAAGGTATTGGAAGAATGCAAATCTCAAGGATTGGAACCCCTTCTA  
TCTAACTTCGACTTTGGGAACAACATCTACATGCGCAGTTGACGACTTCGCATCTATTGCAACAGTACTTTCAAATAATGCACCTCCAGATGTT  
GCAGGCGAGATCTGGGTTACGTCGATGCTGCTTATGCAGGTGCAGCTTTGGTTTTGCCCTGAATACCATCATCTAACATCGTCTTCCAGCATTT  
TCCATTTCTTCGATATGAACATGCACAAAATGGCTTCTGACAAAATTTGACGCTTCTTGTCTATATGTCAAGAAAACGCAAAGATCTGATAGATGC  
ACTCTCCATAACACCAAGTTATCTTCGCAACGAGTTTTTCAGAGAGTGGACTCGTAACCGACTATCGGATTGGCAAATTCCTCTCGGAAGACGCT  
TCCGAAGCTTAAAGATTTGGTTGTCTCAGAACCCTAC

>Bcin09g03030 (MLST4), partial sequence [organism=Botrytis cinerea, strain D13\_MR\_S9]  
ACCCTTCAACCCACCGCAGCTCCTATACCGAAAAGCGAGTATCTTACCAATTTCTCTTCCACCTGCGACTTTAAGACCATTTGGCTTTCCGCACT  
TTCACAAAAAAGCATAGTTTAAACATTGACGTCGTGGCATTACAAGTGTGGCTACTTTTTATTGGAAAGCATTTGTGGGACAGGATGGAGGGAAG

```
AAGGACTGGCAGAGAGAGTCTTGGAGGAGGTCGCCAAGAGTGAAGAATAGGAGTGGCGGTGTCATTGTGCGAGGGCGAGGGAACGGAATTGAAG
GAGATTCTGAAAGCTTTGGAAGGGAATATGAGTGGTGAAGGATAGTCATAGGAAGAGAGCTAAGCCGGCAGAAATAGTTTAGTACTGGGATCAT
CACAATATGGAGAGGTCAATCATAACAAGACTTGGGCTACGGCCAGGGAATATACCCAGAGAGGATAGTCAGTCAAGTTTGGGAATGTCAACGTT
GGAGGTCAATGACGAGGAGGATGAGGATGGCCTGATGGATCCAAGAAGGTGGTTAAAAAGTCATTGATGCATTTGAGCAACCTCGACTGGTGTAC
AATGTTGCTAAAAAAGCACTTTGATAGGTATGTTTCAATGATAAAAAATTTTATCTGAATCTACTAATCAGTACAGAGATACCTCCAAACCTTCA
TTGTTCCACCTGCGTCTCATAAAACACTCCTCTTCCAAAACCGCTATAATGTTATCCATCAACGTCTCCTTCGCAATGAGTCTTTTCAAACGC
CCGCTTTTCAAGGTGGCAAATCTTCCCTTCAACGCAGCACGTCCGCCATTACCACCCAACAACAATCATACAAATTAACGCCGATAGCTAATCT
TCTCGGTGCGCAATCGCAGCTCTCATATGCTTCTCGGTCTCCTCAGTATTTACCCACTGGTACCCTCGCCATCAATGACCTGACGGGCAGTATC
GCTCTCGATCTTACACACGCAGCAGCCATTC
```

>Bcin11g01310 (MLST5), partial sequence [organism=Botrytis cinerea, strain D13\_MR\_S9]

```
GCTGACATGGACCTCATGTGGAACCGCGTAGAATGCGCAACGCTTGAAGTTCGCTCGAATATGGCGATGCAACGTCAACGGCAAAGCCAGT
GTTGCGCTTGCTCGTTATCTGCCACTGTTGCCGCGAGCAAGAAGCTCGGGTCTCTTTGATAAACCCCGGTGGACCCGGTGCCTCTGGTGTG
GCTTTGTGAGTCTGGAGCCGGTGCCCGCTCTCGACACTGAGTGGTGGATTGTACGATATCATCGGATGGGATCCACGTGGAACCGGTGCTTC
GGCTCCTATTTTTGGAATGTTTTGCAAATGCCAGTGCAGGATGATTTTTAACACGCGTTTTCCATCTGCTCCGAATCTCTGGCTCGGACAATTT
GCGAATGCCAGCGCAAATTTCTGCTGTTAGCTCTGCTATCACATCCTTTGACACTTCTGTGCTGCTCTTGCAAAAAGCTTGCCTGGCTCAGAAAT
CTCCCGCTCTTTACACCTCAACAGCAGCATATGTTGCTCGAGACATGGCAGCGATAGTCGATGCATTTGGATGGGACCTCTGCAAACTTAACCTA
CTGGGGTTTCTCATATGGAACATCTTCCCTAGCTGAGTTTATCCAACTTTCCAGGCCGCGTGGGAAGAGTTCTTGCCGATGGTGTTCGCAC
GCAAAGGCAAATGCACTCACATACGTTAGCCAACCTTCCCAACGATCAACTCAGTGTTCGTGCTTCTGTTGAACGATTTTGCAGCTTTCTGCACCA
CCGCCGGTAGTAAAGGTTGCTCTTTTGCACCCGCCCTACTGGAACCTCAGTACTGTTGCTACCAGACTGGACAACATAATGAAGGATATGTT
CCTCAATCCTATTGTTGCTTCGGGCTTAAGCATCA
```

>Bcin15g03910 (MLST6), partial sequence [organism=Botrytis cinerea, strain D13\_MR\_S9]

```
GCCAAAACACAAAATCATCCAACGATGAAGATGACACTCCACTTCCCTTGATTATCTGGCATGGACTCGGCATAAATTACAAAGCGGATGGTCT
TGCGCAAGTTGGAAAAGTAGCTGAAGCTATTCATCTGGGACTTTTGTCTACAATATTCATGTAGATGAGGATGCATCTGCAGATAGGACAGCT
ACCTTCTTTGGAAAATCTCACTCGTGAGTACATCCCTATTTTTTCCCTTTAAATATCATACTAACTCTCTTACCAAGTTCAAATCGAAAAGGTCTG
CGAAGACCTCGCCTCCCATCCTATTTCTCTTACCAGCGCCCGCTCGACGCAATTGGATTCTCCCAAGGCGCCAATTTCTGCGTGGTTACATA
TCCCCTGCAATGCTCCACCATCCGCTCTCTCTGACCTTTGGTTCCCAACACAACGGCATTTCTGCCCTTCCAAGCCTGTGGTCCCGGATTT
TCCTCTGTGCGGGTGTCAAACCTTTTGCAGTCCAACACCTGGTCAACCTTTGTCCAATCTCGTCTCGTACCCGCTCAATACTTCAGAGATCC
GGAAAACCTAGACTCTTACCTTGAATATTTCCAATTTCTTGGCGACGTCATAATGAGCGGCTTCTCAAGAACCACCAATATAAATCCAACATG
GAAAAATTGGAACGATTCGTAATGTATGCTTTGAAAGACGACACAACCTGTCAATTCCTAAGGAAAGTGGATGGTGGGCTGAAGTCAACGGCACGG
AAGTTACACCACTGAAAGAAAGAGCCATTTATAAAGAAAGATTGGCTAGGTTTAAAGACATTTGGATGAGGCCGAAAATTAGTTTTTCGAAACCAT
TCCAGGGGGACATATGACGTTAGGAGAGGAGATGCTAGAGAAGGCTTTCAAAGAGTATTTTGGTCCAGCAGGGAAGAAAATTTGGG
```

>Bcin16g03460 (MLST7), partial sequence [organism=Botrytis cinerea, strain D13\_MR\_S9]

```
ATGAACCTCTTGATTTGAACTCTTCATTAATTTGCAAGTGTATGAACCCCTATTTCTGCCAGAGGATAGTTACAAGACGTATATCATTTAGTCGAGA
ACCACCTCATGATATATATTGACGGATTTTTTGAAGCGAATGAAAGTAAACATTTGGTTGATGTTAGGTGTGTTATTCATTTCTGATGAAATGAAC
AAGAGAGACTGATGAGATAGTGAACCGCTTTATGAACCATCTACTGTTTCTCACGGACAGGAAGTTACCATTGATCCTTCAGTTCCGAATTTCTG
AAGTGGCGGTTTTAGAGAGGGATGAGGTGGTCAAGGTGATTTGAGCATAGAGCGAGGGCATTTACAGGGTGGAGGGGCGAGATGGGGATTGAGAA
GTTGAGGACGCAGAGGTATGGGGTTGGAGGACATTATGGGATGCATTTGTAAGTTTTGGGGGATTGACGAAGGCTTTTGTCTATTTTCTACCAG
TACGGATCTTGAAAAGAAAAGATAGCATGAACACGAGGGCTAATAACTAGGAAATAGCGATTGGAGCGGAGGTAACCTGGCATAGACCGATTTAG
TACTTTTATGGTCTATGTGACGATCTCTCTGATATCGAAGTGGAGGAACGGAATTTCCACGTATTTGTTGGGACAAAAGGAGGAAGGTGGGAG
GACTTCTTGGAAACTACGGAAGCATTTGGATCCAAGAACTGGAGAAAATGTAACAGCAGAAGGGGTGACATTTCAAACCAATCAAGGGAAATGCCG
TATTCTGGGAAAAATACTGACAACAACGGGAGGGGCTATGAT
```

>Bcin12g03020 (MLST8), partial sequence [organism=Botrytis cinerea, strain D13\_MR\_S9]

```
CGATTGGCTGCGAAGAAAAGTGCAGCACCAGTCAACAAAAGCACGAATAAACCATCGGCAAGGGAATATTTCTCTGAACCACAACATGACA
CGAGCGCGGAAGAGTATATCGGGCGAGAAGCTTCATCAAGAGCACCAAAGCGACAACGAGTCGATGATAATTATAACTCTTACGGTGGAAAGAAA
TGAAAATACAGCAGCTTATGCTTCCGGGAAACTTCCATCTGGAAGTATAAATGTTGGTGGAGGTAGGAAGACCACCTTTTCAAGAAGAACCCTCGA
ACGGCATTTGTGCTGGCAAGTTGCCCTTGGAAAGTATCAACATTTGGTGGAAAGAAAGGCTACCCAAATCGAGGACGAGGGTAGAGCAGCTTATG
CTTCCGGAAAATTTGCCCCAGGAAGTATAAATCTTGGCGCAAAGAAAGGCGATTTCAATCCAAGATGAAACGAGACCGGCTTATGTCTCCGGAAA
GCTTCCACATGGTAGTATCGACGGTATGCGAAAACCGTGAAATGGCTGCCGTCCACCAGCAAATTTGCTGAGGGTGGGAGGAAACCAGGCCAGGTT
GTCTCTTCTTATTCACATTCATCTTCAAAGAAAACCTTTCGATGAACCAGAAGAACAAGCGGAACCGGCAAAACCATCCAATGCGCCTT
TGACAGAGGAAAATGGCGACTTTACCAATCTAGGGCTATCGAGAAGGCTTGCAGCCCATCTATCGACTAAACCTCGATATGAAAGCCCCGACGGC
CATTTCAAAAAGCATCTGTGACGAGTTGGTATCGGACGATAGCGATGCTTTCATACAAGCAGAGACTGGATCTGGAAAACCTTTGGCATATCTA
CTACCTATAGTCGAGCGAATATTAGCATTGAGTGAGAATGGCGTACAAA
```

>Bcin02g07770 (MLST9), partial sequence [organism=Botrytis cinerea, strain D13\_MR\_S9]  
CAGCTTTCCCTTTTCGGTCTTGGCATCTACAGTCATTGCCATCCCTACACCATCACAACCTTGAGTCTCGGGCCGTTATCGATTCCGATGCCGTTG  
TAGGATTTGCCGAAACTGTTCCAGTGGGACCGTAGGAACAGTTTATGAGGCATATAAACCATTCCTTAAAGTCGTAAATGGATGCGTACCATT  
CCCTGCCGTCGATGCATCGGGTAACACAGGGTATGTCCCTTATACCTTTCTCTTCCACACGATTGCTATTGAGTCTCTAACATATTTTAGTGGTG  
GTTTGTACCAACTGGCAGCAGCAATGGTGAATGCAGCAGCAGTACCGGTCAAGTATATGTTTCGAGGAGGACAAAGCGGATCAAACCTACGCTAT  
CATGTACTCCTGGTAAGTTCTCTTTAAACTTCTCCTTATAGATCCAACCTAACAAAATCTTAGGTACATGCCAAAGGACGAGCCCTCAACCGGT  
ATTGGTACACCGTACAGATTGGGAAGGTGTAATTGTCTGGCTCTCCAGCGCCACCGCCACAACCTGCCGACAACATCTTAGCCGTTTGTCTTCCG  
CCCACGGAGGCTGGGATTGTTCACGGATGGCTATTCCCTTTCTGGTACCAGCCCTCTTATCAAGTACGAAAGTATCTGGCCCCGTCGATCACTC  
AATGGGTCTTACTAGTACTGTTGGTGAAAACAACCTATGATTGCTTGGGAGTCTTTACCAACTGCTGCTCAAACCTGCTCTTGAGAACACCGAT  
TTCGGTGTGCGAATGTTCCATTCATTCGGCTGTTTTTCACAGATAATCT

>Bcin04g02090 (MLST10), partial sequence [organism=Botrytis cinerea, strain D13\_MR\_S9]  
CGGAGGATGATATGGCAAAGTCTATGATTACCAAGGCATTTGTAGGCATGAGTAGTAAATTTGTCGAATATGACTATGAATGATGTTTACAAGCC  
CTACATCCATGTAAGAAAATGTAGAATAAAGAGATCGGTAACCTGGAACCTAATATCGTTTGCAGGCTTTCAAGTTACTTACGCAGTTCAACCCAAT  
CACTACAGCTATTGCCGAATCCCCACTATTTCAAATGGCTGTACAGCAAATACCATCGAAAAGTACACACTGCTAGGCCCTTTCTTCAGGAAT  
ATCTCCTCTGCAACAGGAAGTTACCAGGAATACTTCAAGTGCGCCAAAGACGATAGATAGGCGACACATTGCCACATCTCAAGATGCGTTACGA  
TTGACCTTACAAAACCATCAAAGATTTACTTGTATATCAACCACTTTGTTTCGAGCAAGTCCAATCGCAAAGCAAACCCCTGGATTGGTTTC  
GCCTACATTGTGAATCAAATCACAAGCGTCGAGCACTTCAAGTAGACCCGAAGAGTGTCTTCTGATGGCTTATGCACAATGTCACCTGTCTGTT  
CTAGATGGTCTTTGTGAGCCATTCATGGATAACCACATTTCTCAAAAATTTTGAAGATTGATATTGATTATCTAAGACGCGCGCCCTCGTGTAGATA  
TCAAGGACGAGACCAAGTTGAACGCTGATGAGAAGGCTTCTGAGAAGTATTATGAGGACACTGTTCTGGCACTTCTAATTTTCACTCTGAGGT  
ATTCTTTCTGACATTGGCTGCTCATCATTATGGTAGTGAAGCTCTTAATGCCACGCATAAGAGTCTGGAGAAGACATCAAATATATTTCAAAGC  
AATTGACTGCCGTTGAAGCA

>Bcin01g07220 (MLST1), partial sequence [organism=Botrytis cinerea, strain D13\_B\_KF1\_25]  
ATGGCATATCTTGTCTTTTCGCATTATGCTTTGGAACGTGCTGGACAAGCTTGGGTTAGTGTCTCGCTGTAGAAGCACTAAAGAAGATTCT  
CGCACAACCGAAGTCATGGTTTTGAGGAATCCAGGAATTCACCTGGCCGGTTGAACGAAGTTTTGGATAGGAACCTTGAGGAAATGCGTAATCTC  
GTTGGCCGCTTTGCTGGTATTGTATTCACAGCATTTTTATGTATTGATATCAATCATTGTTGGCTTTTGTGAATACATGGAAACCTGACATTAGT  
CTCGATGGCAACTGGGCCAGTTATATACGCTGTACCAAAAACATTCATCGCGTGTAGTGGAAAATGGGAAAACAAGTGAACCTACGCCCTGAA  
ATGACCACTGGCATAATTTTCAGAGACTTCTCCAACATCAAAGTGGTTCGGGCTTTTACTCTGGAAACTTACTTTGAGACAAAACACACCAAAG  
CTACAGAAGAAGCTTTATAAAGTTGGACTAATACGAGCAAACCTACTCGGGATTGCTGTGGGGATTGACAGATGCGATGTCATTCTTCATCACTGC  
AACTATCTTTTATTATGCCACGGTTCTCATTACCAAGAGAGAGATCAGTATCGCGACTGCACTACAGACTGTCAATCTTCTATTATTTGGTATT  
TCTAATAGTACGAATATGCTGGCCATGATACCACAAATCAACTCTTCTCGGTTACAGCTACGCATATGCTTGCATTAGCCAATCTCGATTTCAT  
CTTCTCCACGAAAATAAAGGAACCGAACGGCTTTTCGACAATCTTTCCAATCAAATTC AACCGTCTTTCATTACATACCCCTACTCGTCTGTA  
AAAACGAACGATATCATCCTTTTCTCTTTCCCTGATTCCCTAACTCAACAACCTGCACCTGTGCGACCCCTCCGGCTCCGAAAATCTACAATAGTT  
GCTCTGCTCATTGGTCTCTATCCGCCAGATACTTCAACACCTCCACCGTTGACATTCAATCGCGTCTCCATAAGTAACCTGTCACATTCGGTCTC  
TCCGGGCTTCTCTCACTCGTTCACAAAATACCGATTCTATTTCCAGCTACCATTCTCCATAACATCATTTATGGTCTCCAGAATCTTCTCC  
TTGTGCTAGTCTTCCATCAGCTATTGCATCAGCAAAGATGCTGGGATCCATGAATTTATCACATCGCTTCCACAAGGTTATGATACTAT

>Bcin05g07690 (MLST2), partial sequence [organism=Botrytis cinerea, strain D13\_B\_KF1\_25]  
CACCCTATCACCAAGTCTTTCTGCACTTTCCCTCATCAAAAACGAACGAGAATCATCAATAAACTTTGCTGAAGTAATGGGTTTTATT  
TTGGCCAGGATGCCTTCTCTCTACGACAGCAAGCCTTCGATGATATGTTGTGGGTAGTCTTGGCTGGCTGGATACTGTCAAATTCATTGATTT  
ACATTCTGAATTGCACTATTCAAACGACTCTCAGCCAGAAATGGTACGACAACAATATAAACCTGCATTTGCACATCGAGCGGACTATTTTGG  
GAATTGGCTTCAAAAGGATGGGATACTACTCTCTGTGGTGGTGGATGATATGGTACCATACTTACTCCATAACAAGAACGAATTTACCAATG  
AACTCTATATCGCAGCTTCGATATCGATGTACCTATATTTCCCCGGAGATGACAATCGATCCCCATTTATGCTTTCCAACCCCTTCGTATCCACC  
TCACGATCCGAAATATCTACAGGCAGCTGTTGATGCTTACAAAATGGCTGAATGGTTCCAACATGACGGATTTACAAGGATTATATGTCGACGGG  
TACCATATCTCGAATCTTCTGGCGGTGAAAACACCCATTCGCAATCTAGAAAATGAGATGGTATATACCTACAATCAAGGTGTTTTGCTTACTG  
GACAACGTGGTTTTGTATGACGCAACCGCCGACGATCATACCTTGTAGATGGCCACAACTCATCGCGAATGTTATTAATGCCACAGGCTATGA  
CCTGAAACACAATGTTGTCATCTCACCGCCACCCAAAGATGGTTCGCATTTGGCAAAGTGGTTTGGCCTGGGTAGGAATGGAATACCTGGAAGAA  
GGATGCGATTCAAGTCTTCGTGTTCTCAAAAATGGACAAAATTTCAAAGGCATATCTTTTCACTACTGATTGCGTCTGTAGTATTGTTGCCAG  
GGGAGCCTATTCGAGGGACGAAGGAAAGCTTAGAACTCGACAGAGTGTGGCATTCTGACAAAATGCTCACAGTATACAAAATG

>Bcin06g01710 (MLST3), partial sequence [organism=Botrytis cinerea, strain D13\_B\_KF1\_25]  
GTGAGTCTGACTTTTGTATTTGAGCGTTAAGATAGACACTGATATACCAAGGCAATCACCTAATTTTCATGGCGTCTTCCCTGCATCATCTACC  
TACCCTGGAATGCTGGGAGAATTAATACTCAGCAGCTTTACAGCACCTGCTTTCAATTTGGATCTGTTCCCTGCTGTGACAGAATTTGGAGACGG  
TTGTAATGGATTGGCTGGCCAAGCTTCTCAATCTCCAGACTGTTATTTGTCTTCGACTCATGGTGGTGGTGTCTCCAAGGATCAGCCCTCGGA  
AGCTATCGTTACCGTTATGGTTGCTGCCCGGATAAATATCTTCGTGAACTACTGAAGTCTGTGCGGCATTGAACTCGAGGATGCGATTGCA  
TATAAGAGGAGTAAGCTAGTTGCACTAGGAAGCGAAATGGCACACAGCTCCACGCAGAAAGCAGCGCAAATAGCTGGCGTTAGATTCCGATCGA



```
TTCCAGTACTCGCATCCAATGATTTTCGCCATGACGGGTGATGATTTAGAGAAGGTATTGAAAGAATGCAAATCTCAAGGATTGGAACCCCTTCTA
TCTAACTTCGACTTTGGGAACAACACCTACATGCGCAGTTGACGACTTCGCATCTATTGCAACAGTACTTTCAAAAATATGCACCTCCGGATGTT
GCAGGCGAGACCTGGGTTACGTCGATGCTGCTTATGCAGGTGCAGCTTTGGTTTGCCCTGAATACCATCATCTAACATCGTCTTTCCAGCATT
TCCATTCCCTTCGATGTGAACATGCACAAAATGGCTTCTGACAAAATTTTCGACGCTTCTGTCTATATGTCAAGAAAACGCAAAGATCTGATCGATGC
ACTGTCCATAACACCAAGTTATCTTCGCAACGAGTTTTTCAGAGAGTGGACTCGTAACCGACTATCGGGACTGGCAAATTCCTCTCGGAAGACGC
TTCCGAAGCTTAAAGATTTGGTTTGTCTCAGAACCCTACG
```

```
>Bcin09g03030 (MLST4), partial sequence [organism=Botrytis cinerea, strain D13_B_KF1_25]
ACCCCTCAACCCACCGCAGCTCCTATACCGAGAGCGAGTATCCTACCAATTCTCCTTCCACCTGCGACTTTAAGACCATTGGCTTTCCGCACT
TTCACAAAAAAGCATAGTTTAAACATTGACGTCGTCGGCATTACAAGTGTGGCTACTTTTATTGGAAAGCATTGTGGGACAGGATGGAGGGAAG
AAGGACTGGCAGAGAGAGTCTTGGAGGAGGTGCGCAAGAGTTGGAAGAATAGGAGTGGCGGTGTCAATTGTGCGAGGGCGAGGGAACGGAATTGAA
GGAGATTCTGAAAGCTTTGGAAGGGAATATGAGTGGTGAAGGATAGTTCATAGGAAGAGAGCTAAGCCGGCAGAATAGTTTAGTACTGGGATCA
TCACAATATGGAGAGGTCAATCATAACAAGACTTGGGCTACGGCCAGGGAATATACCAGAGAGGATAGTCAAGTTTGGGAATGTCAACGT
TGGAGGTCAATGACGAGGAAGATGAGGATGGCCTGATGGATCCAAGAAGGTGGTTAAAAGTCATTGATGCATTTGAGCAACCTCGACTGGTGTGA
CAATGTTGCTAAAAAGCACTTTGATAGGTATGTTTCAATGATAAAAATTTTCATCTGAATCGACCAACTCAGTACAGAGATACCTCCAAACCTTCA
TTGTTCCACCTGCGTCTCATAAAACACTCCTCTTCCAAAACCGCTATAATGTTATCCATCAACGTCTCCTTCGCAATGAATCTTTTCAAACGC
CCGCTTTTCAAGGTGGCAAATCTTCCCTTCAACGCAGCAGCTCCGCCATTACCACCCAACAACAATCATACAAATTAACGCCGATAGCTAATCT
TCTCGGTGCGCAATCGCAGCTCTCATATGCTTCTCGGTCTCCTCAGTATTTACCCCACTGGTACCCTCGCCATCAATGACCTGACGGGCAGTATC
GCTCTCGATCTTACACACGCAGCAGCCATTC
```

```
>Bcin11g01310 (MLST5), partial sequence [organism=Botrytis cinerea, strain D13_B_KF1_25]
GCTGACATGGACCTCATGTGGAACCGGCGTAGAATGCGCAACGCTTGAAGTTCCGCTCGAATATGGCGATGCAACGTCAACGGCAAAGCCAGT
GTTGCGCTTGCTCGTTATCCTGCCACTGTTGCCGCGAGCAAGAAGCTCGGGTCTCTCCTGATAAACCCCGGTGGACCCGGTGCCTCTGGTGTG
GCTTTGTGAGTCTGGAGCCGGTGCCGCCGCTCGACACTGAGTGGTGGATTGTACGATATCATCGGATGGATCCACGTGGAACCCGGTGCCTTCG
GCTCCTATTTTGAAGTGTFTTGCAAAATGCCAGTGCAGGATGATGATTTTAAACAACGCGTTTCCATCTGCTCCGAATCTCTGGCTCGGACAATTTG
CGAATGCCAGCGCAAATTTCTGCTGTAGCTCTGCTATCACATCCTTTGACACTTCTGTGCGTGTCTTGCAAAAGCTTGGCTGGCTCAGAAATC
TCCCCTCTTTTACACCTCAACAGCAGCATATGTTGCTCGAGACATGGCAGCGATAGTGCATGCATTGGATGGGACCTCTGCAAAACCTTAACCTAC
TGGGGTTTCTCATATGGAACATATCTTCTAGCTGAGTTTATCCAACTTTCCAGGCCGCGTGGGAAGAGTTCTTGGCGATGGTGTFTTTCGACG
CAAAGGCAAATGCACTCACATACGTTAGCCAACTTTCCAAACGATCAACTCAGTGTTCGTGCTTCGTTGAACGATTTTGCAGCTTCTGCAACCAC
CGCCGGTAGTAAAGGTTGCTCTTTTGGCCACCGCCCTACTGGAACCTCAGGTACTGTTGCTACCAGACTGGACAACATAATGAAGGATATGTTT
CTCAATCCTATTGTTGCTTCGGGCTTAAGCATCA
```

```
>Bcin15g03910 (MLST6), partial sequence [organism=Botrytis cinerea, strain D13_B_KF1_25]
GCCAAAACACAAAATCATCCAACGATGAAGATGATACTCCACTTCCCTTGATTATCTGGCATGGACTCGGCGATAATTACAAAGCGGATGGTCT
TGCGCAAGTTGGAAACTAGCTGAAGCTATTCATCCTGGGACTTTTGTCTACAATATTCATGTAGATGAGGATGCATCTGCAGATAGGACAGCT
ACCTTCTTTGAAAATCTCACTCGTGAGTACATCCCTATTTTTCTTTAAATATCATACTAATCTCTTACCAAGTTCAAATCGAAAAGGTCTG
CGAAGACCTCGCCTCCCATCCTATTCTCTCTACCAGCCCGCCGCTCGACGCAATGGATTCTCCCAAGGCGGCCAATTTCTTGGCTGGTTACATA
TCCCCTGCAATGCTCCACCCATCCGCTCTCTCTGACCTTTGGTTCCCAACACAACGGCATTTCTGCCTTCCAAGCCTGTGGTCTGCGGATT
TCCTCTGTGCGGGTGTCAAACCTTTTGGGATCCAACACCTGGTCAACCTTTGTCCAATCTCGTCTCGTACCCGCTCAATACTTTCAGAGATCC
GGAAAACCTAGACTCTTACCTTGAATATTTCCAATTTCTTGGCGACATCAATAATGAGCGCGTTCTCAAGAACCACAAATATAAAATCCAACATG
GAAAAATTGGAACGATTTCGTAATGTATGCTTTGAAAGACGACACAACACTGTCAATCCTAAGGAAAGTGGATGGTGGGCTGAAGTCAACGGCACGG
AAGTTACACCACTGAAAGAAAGAGCCATTTATAAAGAAGATTGGCTAGGTTTAAAGACATTGGATGAGGCCGAAAATTAGTTTTTCGAAACCAT
TCCAGGGGGACATATGACGTTAGGAGAGGAGATGCTAGAGAAGGCTTTCAAAGAGTATTTTGGTCCAGCAGGGAAGAAATTTGGG
```

```
>Bcin16g03460 (MLST7), partial sequence [organism=Botrytis cinerea, strain D13_B_KF1_25]
ATGAACCTCTTGATTTGAACTCTTCATTAATTGCAAGTGATGAACCCCTATTCTGCCAGAGGATAGTTACAAGACGTATATCATTAGTTCGAGA
ACCACCTCATGATATATATTGACGGATTTTGGAAAAGCAATGAAAGTAAACATTTGGTTGATGTTAGGTGTGTTATTTATCTGATGAAATGAAC
AAGAGAGACTGATGAGATAGTGAGCCGCTTTATGAACCGTCAACTGTTTCTCACGGACAGGAAGTTACCATTGATCCTTTCAGTTCCGAAATCTG
AAGTGGCGGTTTTAGAGAGGGATGAGGTGGTCAAGTGTATTGAGCATAGAGCGAGGCGATTTTCAGGGTGGAGGGGCGAGATGGGGATTGAGAA
GTTGAGGACGCGAGGATGAGGTTGGAGGACATTTATGGGATGCATTTGTAAGTTTTGGGGATTGACGAAGGCTTCTGTCTATTTTCTATCAG
CACGGATCTTGAAGAAAAGATAGCATGAACACGCGGGCTAATAACTAGGAAAATAGCGATTGGAGCGGAGGTAACCTGGCATAGACCGATTTAG
TACTTTTCATGGTCTATGTGCGACGTATCCTCTGATATCGAAGGTGGAGGAACGGAATTTCCACGTATCGTGGGACCAAAAGGAGGAAGGTGGGAG
GACTTCTTGGAACTACGGAAGCATTTGGATCCAAGAACTGGAGAAAATGTAACAGTAGAAGGGGTGACATTTCAAACCAATCAAGGGAAATGCCG
TATTCTGGGAAAATACTGACAACAACGGGAGGGGCTATGAT
```

```
>Bcin12g03020 (MLST8), partial sequence [organism=Botrytis cinerea, strain D13_B_KF1_25]
CGATTGGCTGCGAAGAAAACCTGCGCAGCACCGAGTCACCAAAAGCACGAATATACCATCGGCAAGGAAATATTCTCTGAACCACAACATGACA
```

```
CGAGCGCGGAAGAGTATATCGGGCGAGAAGCTTCATCAAGAGCACCAAAGCGACAACGAGTCGATGATAATTATAACTCTTACGGTGGAAAGAAA
TGAAAATACAGCAGCTTATGCTTCCGGGAAACTTCCATCTGGAAGTATAAATGTTGGTGGAGGTAGGAAGACCACCTTTTCAAGAAGAACCCTCGA
ACGGCATTGTGCTGGCAAGTTGCCCCCTGGAAGTATCAACATTTGGTGGAAAGAAAGGCTACCCAAATCGAGGACGAGGGTAGAGCAGCTTATG
CTTCCGGAAAAATTGCCCCAGGAAGTATAAACTCTGGCGCAAAGAAAGGCGATTTTCATTCCAAGATGAAACGAGACCGGCTTATGTCTCCGGAAA
GCTTCCACATGGTAGTATCGACGGTATGCGAAACCGTGAAATGGCTGCCGTCCACC CGCAAATTTGCTGAGGGTGGGAGGAAACCAGGCCAGGTT
GTCTCTTCTTATTACATTTCAATCTTACTTCAAAGAAAACTTTTCGATGAACCAGAAGAACAAGCGGAACCGGCAAACCATCCAATGCGCCTT
TGACAGAGGAAAATGGCGACTTTACCAATCTAGGGCTATCGAGAAGGCTTGCAGCCCATCTATCGACTAAACTCGATATGAAAGCCCCGACGGC
CATTCAAAAAGCATCTGTGCAGCAGTTGGTATCGGACGATAGCGATGCTTTCATACAAGCAGAGACTGGATCTGGAAAAACTTTGGCATATCTA
CTACCTATAGTCGAGCGAATATTAGCATTGGGTGAGAATGGCGTACAAA
```

```
>Bcin02g07770 (MLST9), partial sequence [organism=Botrytis cinerea, strain D13_B_KF1_25]
CAGCTTTCCCTTTTCGGTCTTGGCATCTACAGTCATTGCCATCCCTACACCCTCACAACTTGAGTCTCGGGCCGTTATCGATTCCGATGCCGTTG
TAGGATTTGCCGAAACTGTTCCAGTGGGACCGTAGGAACAGTTTATGAGGCATATAAACCATTCCTTAAAGTCGTAAATGGATGCGTACCATT
CCCTGCCGTGCGATGCATCGGGTAACACAGGGTATGTCTTATACTTTCTCTTCCACACGATTGCTATTGAGTCTCTAATATATTTTTAGTGGTG
GTTTGTACCAAACTGGCAGCAGCAATGGTGAATGCAGCAGCAGTACCGGTCAAGTATATGTTTCGAGGAGGACAAAGCGGATCAAACCTACGCTAT
CATGTACTCGTGGTAAGTTCTCTTTAACTTCTCCTTATAGATCCAACCTAACAAAATCTTAGGTACATGCCAAAGGACGAGCCCTCAACCGGT
ATTGGTCACCGTCACGATTGGGAAGGTGTAATTTGCTGGCTCTCCAGCGCCACC GCCACAACCTAGCCGATTTGTCTTCCG
CCCACGGAGGCTGGGATTTGTTCCACGGATGGCTATTTCCCTTTCTGGTACCAGCCCTCTTATCAAGTACGAAAGTATCTGGCCCGTCGATCACTC
AATGGGTCTTACTAGTACTGTTGGTGGAAAAACAACCTATGATTGCTTGGGAGTCTTTACCAACTGCTGCTCAAACCTGCTCTTGAGAACACCGAT
TTCGGTGTGCGAATGTTCCATTTCATTCCGGCTGTTTTTCACAGATAATCT
```

```
>Bcin01g07220 (MLST1), partial sequence [organism=Botrytis cinerea, strain D13_MR_S11]
ATGGCATATCTTGTCTTTTCGCATTATGCTTTGGAACGTGCTGGACAAGCTTGGGTTAGTGCTCTGCGTGTAGAAGCACTAAAGAAGATTCT
CGCACAACCGAAGCCATGGTTTGAGGAATCCAGGAATTCACCTAGCCGTTGAACGAAGTTTTGGATAGGAACCTCGAGGAAATGCGTAATCTC
GTTGGCCGCTTTGCTGGTATTTGATTTACAGCATTTTTTTATGCTATTTGATATCAATCATTTGGGCTTTTCGTGAATACATGGAAACTGACATTA
GTCTCAATGGCAACTGGGCCAGTTATATACGCTGTCAACAAAACGTTCAATCGCGTGTAGTGGAAAATGGGAAAACAAGTGAACCTACGCATCTG
AAATGACCACTGGCATAATTTTCAGAGACTTTCTCCAACATCAAAGTGGTTCGGGCTTTTACTCTGGAACCTACTTTAAGACAAAACACACCAA
AGCTACAGAAGAACTCTATAAAGTTGGACTAATACGAGCAAACCTACTCGGGATTGCTGTGGGGATTGACAGATGCAATGTCAATTTTCATCACT
GCAACTATCTTTTATTTATGCCACGGTTCTCATTACCAAGAGAGAGATCAGTGTGCGGGCTGCACCTACAGACTGTCAATCTTCTATTTATTTGGTA
TTTTTAATAGTACGAATATGCTGGCCATGATACCACAAAATCAACTCTTCTCGCGTTACAGCTACGCATATGCTTGCATTAGCCAATCTCGATTCT
ATCTTCCCTCCACGAAAATAAAGGAACCGAACGGCTTTGACAACTTTTCCAATCAAATTCACCGTCTTTTCATTACATACCCTACTCGTCCCT
GAAAAACGAACGATATCATCTTTTCTCTTTCCCTGATTCCCTAACTCAACAACCTGCACCTTGTGCGGACCCCTCCGGCTCCGGAAAATCTACAATAG
CTGCTCTGCTCATTGGTCTCTATCCGCCAGATACTTCAACACCTCCACC GTTGACATTTCAATCGCGTCTCCATAAGTAACTGTCACATTCGGTC
TCTCCGGGCTTCTCTCTCACTCGTTCCACAAAATACCGATTCTATTTCCAGCTACCATTCTCCATAACATCATTTATGGTCTCCAGAATCTTCT
CCTTGTGCTAGTCTTCCATCTGCTATTTGCGTCAGCAAAAAATGCTGGGATCCATGAATTTATCACATCGCTTCCACAAGGTTATGATACTAT
```

```
>Bcin05g07690 (MLST2), partial sequence [organism=Botrytis cinerea, strain D13_MR_S11]
ACCACTATCACAAGTCTTTTCTGCACTTTCCCTCATCAAAAACGAACGAGAACATCATCAATAAATACTTTGCTGAAGTAAATGGGTTTTATT
TTGGCCAGGATGCCTTCTCTTACGACAGCAAGCCTTCGATGATATGTTGTGGGTAGTTCTTGGCTGGCTGGATACTGTCAAATTCATTGATTT
ACATTCTGAATTTGCACTATTCAAACGACTCTCAGCCAGAAATGGTACGGACAACAATATAAACCTGCATTTGCACATCGAGCGCGACTATTTTGG
GAATTTGGCTTTCACAAGGATGGGATACTACTCTCTGTGGTGGTGGGATGATATGGTCCACATACCTTACTCCATAACAAGAACGCAATTACCAATG
AACTCTATATCGCAGCTTCGATATCGATGTACCTATATTTCCCGGAGATGACAATCAATCCCATTTATGCTTTCCAACCTTTCATATCCACC
TCAGATCCGAAATATCTACAGGCAGCTGTTGATGCTTACAAATGGCTGAATGGTTCACATGACGGATTTACAAGGATTTATATGTCGACGGG
TACCATATCTCGAATCTTTCTGGCGGTGAAAAACCCCATTTGCGATTCTAGAAATGAGATGGTATATACCTACAATCAAGGTGTTTTGCTTACTG
GACAACGTGGTTTGTATGACGCAACCGCCGACGATCATACCTTGTAGATGGCCACAAACTCATCGCAATGTTATTAATGCCACAGGCTATGA
CCTGAAACACAATGTTGTCATCTCACC GCCACCCAAAGATGGTTCCGCATTGGCAAAGTGGTTTTGGCTGGGTAGGAATGGAATACTGGAAGAA
GGATGCGATTCAAGTGTCTCGTGTCTCAAAAATGGACAAAATTTCAAAGGCATATTTCTTTTCATCACTTGTATTGCGTCTGTAGTGAATTTGCCAG
GGGAGCCTATTGCAGGGACGAAGGAAAGCTTAGAACTCGACAGAGTGTGGCATTTCTGACAAATGCTCACAGTATACAAAAT
```

```
>Bcin06g01710 (MLST3), partial sequence [organism=Botrytis cinerea, strain D13_MR_S11]
GTGAGTCTGACTTCTGTGTTTGGAGCGTTAAGATAGACACTGATGTACCAAGGCAATCACCTAATTTTCATGGCGTCTTCCCTGCATCATCTACC
TACCCTGGAATGCTGGGAGAATTATACTCAGCAGCTTTACAGCACCTGCTTTCAATTTGACCTGTTCCCTGCCGTGACAGAATTTGGAGACGG
TTGTAATGGATTGGCTGGCCAAGCTTCTCAATCTCCAGACTGTTATTTGCTTTCGACTCATGGTGGTGGTGTATCCAAGGATCAGCCTCGGA
AGCTATCGTTACCGTTATGGTTGCTGCCCGGATAAAATATCTTCGTGAAACTACTGAAGGTCGTGCGGCATTGAACTCGAGGATGCGATTGCA
TATAAGAGGAGTAAGCTAGTTGCACTAGGAAGCGAAAATGGCACACAGCTCCACGCGAAGCAGCGCAGATAGCTGGCGTTAGATTCCGATCGA
TTCCAGTACTCGCATCCAATGATTTGCGCATGACGGGTGATGATTTAGAGAAGGTATTTGGAAGAATGCAAATCTCAAGGATTTGGAACCTTCTA
TCTAACTTCGACTTTGGGAACAACATCTACATGCGCAGTTGACGACTTCGCATCTATTTGCAACAGTACTTTCAAATATGCACCTCCAGATGTT
```

GCAGGCGAGATCTGGGTTACGTCGATGCTGCTTATGCAGGTGCAGCTTTGGTTTGGCCCTGAATACCATCATCTAACATCGTCCTTCCAGCATT  
TCCATTCCCTTCGATATGAACATGCACAAATGGCTTCTGACAAATTTTCGACGCTTCTTGTCTATATGTCAAGAGACGCAAAGATCTGATAGATGC  
ACTCTCCATAACACCAAGTTATCTTCGCAACGAGTTTTTCAGAGAGTGGACTCGTAACCGACTATCGGGATTGGCAAATTCCTCTCGGAAGACGC  
TTCCGAAGCTTAAAGATTTGGTTTGTCTCAGAACCTACG

>Bcin11g01310 (MLST5), partial sequence [organism=Botrytis cinerea, strain D13\_MR\_S11]  
ACTGACATGGACCTCATGTGGAACCGGCGTAGAATGCGCAACGCTTGAAGTTCCGCTCGAATATGGCGATGCAACGTCAACGGCAAAGCCAGT  
GTTGCGCTTGGCTCGTTATCTGCCACTGTTGCCGCGAGCAAGAAGCTCGGGTCTCTCTTGATAAACCCCGGTGGACCCGGTGCCTCTGGTGTG  
GCTTTGTGCAGTCTGGAGCCGGTGCCGCGTCTCGACACTGAGTGGTGGATTGTACGATATCATCGGATGGGATCCACGTGGAACCGGTGCTTC  
GGCTCCTATTTTGGAAATGTTTTGCAAATGCCAGTGGGAGTATGATTTTAAACAACGCGTTTCCATCTGCTCCGAATCTCTGGCTCGGACAATTT  
GCGAATGCCAGCGCAAATTTCTGCTGTTAGCTCTGCTATCACATCCTTTGACACTTCTGTGCTGCTCTTGCAAAAAGCTTGCCTGGCTCAGAAAT  
CTCCCGCTCTTTACACCTCAACAGCAGCATATGTTGCTCGAGACATGGCAGCGATAGTTCGATGCATTGGATGGGACCTCTGCAAAAACCTTAAC  
CTGGGGTTTCTCATATGGAACATTTTCTAGCTGAGTTTATCCAACTTTCCAGCCGTGTGGGAAGAGTTCTTGCCGATGGTGTTCGAC  
GCAAAGGCAAATGCACTCACATACGTTAGCCAACCTCCCAACGATCAACTCAGTGTTCGTGCTTCGTTGAACGATTTTGCAGCTTTCTGCACCA  
CCGCCGGTAGTAAAGGTTGCTCTTTTGGCCACC GCCCTACTGGAACCTCAGGTAAGTGTGCTACCAGACTGGACAACATAATGAAGGATATGTT  
CCTCAATCCTATTGTTGCTTCGGGCTTAAGCATCA

>Bcin15g03910 (MLST6), partial sequence [organism=Botrytis cinerea, strain D13\_MR\_S11]  
GCCAAAACACAAAATCATCCAACGATGAAGATGATACTCCACTTCCCTTGATTATCTGGCATGGACTCGGCGATAATTACAAAGCGGATGGTCT  
TGCGCAAGTTGGA AAACTAGCTGAAGCTATTCATCTGGGACTTTTGTCTACAATATTCATGTAGATGAGGATGCATCTGCAGATAGGACAGCT  
ACCTTCTTTGAAAATCTCACTCGTGAGTACATCCCTATTTTTCTTTAAATATCATACTAACTCTCTTACCAAGTTCAAATCGAAAAGGCTCTG  
CGAAGACCTCGCCTCCCATCCTATTCTCTTACC GCGCCCGCTCGACGCAATTTGGATTCTCCCAAGGCGGCCAATTTCTTGCCTGGCTACATA  
TCCCCTGCAATGCTCCACCCATCCGCTCTCTCTGACCTTCGGTTCCCAACACAACGGCATTCTGCTTCCAAGCCTGTGGTCTGCCGACT  
TCCTCTGTGCGGGTCTCAAACCTTTTGCATCCAACACCTGGTCAACCTTTGTCCAATCTCGTCTCGTACCCGCTCAATACTTCAGAGATCC  
GGAAAACCTAGACTCTTACCTTGAATATTTCAATTTCTTGGCGACATCAATAATGAGCGGTTCTCAAGAACCAAACATATAAATCCAACATG  
GAAAAATTGGAACGATTTCGTAATGTATGTCTTTGAAAGCAGATACAACCTGTCATCCCTAAGGAAAGTGGATGGTGGGCTGAAGTCAACGGCACGG  
AAGTTACACCACTGAAAGAAAGAGCCATTTATAAAGAAGATTGGCTAGGTTTAAAGACATTTGGATGAGGCCGAAAATTAGTTTTCGAAACCAT  
TCCAGGGGGACATATGACGTTAGGAGAGGAGATGCTAGAGAAGGCTTTCAAAGAGTATTTTGGTCCAGCAGGGAAGAAATTTGGGG

>Bcin16g03460 (MLST7), partial sequence [organism=Botrytis cinerea, strain D13\_MR\_S11]  
ATGAACCTCTTGATTTGAACTCTTCATTAATTGCAAGTGATGAACCCCTATTCTGCCAGAGGATAGTTACAAGACGTATATCATTAGTTCGAGA  
ACCACCTCATGATATATATTGACGGATTTTGTAAAAGCGAATGAAAAGTAAACATTTGGTTGATGTTAGGTGTGTTATTCATCTCGATGAAATGAAC  
AAGAGAGACTGATGAGATAGTGAACCGCTTTACGAACCATCTACTGTTTCTCACGGACAGGAAGTTACCATTGATCCTTCAGTTCCGGAATTCG  
AAGTGGCGGTTTTAGAGAGGGATGAGGTGGTTCAGGTGATTTGAGCATAGAGCGAGGGCATTTCAGGGGTGGAGGGGCGAGATGGGGATTGAGAA  
GTTGAGGACGCAGAGGTATGGGGTTGGAGGACATTTATGGGATGCATTTGTAAGTTTGGGGGATTGACGAAGGCTTTTGTCTATTTTCTACCAG  
TACGGATCTTGAAGAAAAGATAGCATGAACACGAGGGCTAATAACTAGGAAAATGGCGATTGGAGCGGAGGTAAACGTGGCATAGACCGATTTAG  
TACTTTTCATGGTCTATGTGCGACGTATCCTCTGATATCGAAGGTGGAGGAACGGAATTTCCACGTATCGTGGGACCAAAGGAGGAAGGTGGGAG  
GACTTCTTGAAAACCTACGGAAGCATTTGGATCCAAGAACTGGAGAAAATGTAACAGTAGAAGGGGTGACATTCAAACCAATCAAGGGAAATGCCG  
TATTCTGGGAAAATACTGACAACAACGGGAGGGGCTATGAT

>Bcin12g03020 (MLST8), partial sequence [organism=Botrytis cinerea, strain D13\_MR\_S11]  
CGATTGGCTGCGAAGAAAACCTGCGCAGCACCAGTCAACAAAAGCAGCAATAAACCATCGGCAAGGAAAATATTCTCTGAACCACAACATGACA  
CGAGCGCGAAGAGTATATCGGGCGAGAAGCTTCATCAAGAGCACCAAAGCGACAACGAGTTCGATGATAAATTATAACTCTTACGGTGGAAAGAAA  
TGAAAATACAGCAGCTTATGCTTCCGGGAAAACCTCCATCTGGAAGTATAAATGTTGGTGGAGGTAGGAAGACCCTTTTCAAGAAGAACCACGA  
ACGGCATTGTGCTGCAAGTTGCCCCCTGGAAGTATCAACATTTGGTGGAAAGAAGGCTACCCAAATCGAGGACGAGGGTAGAGCAGCTTATG  
CTTCCGAAAATTTGCCCTCAGGAAGTATAAACTCTGGCGCAAAGAAGGCGACTTCATCCCAAGATGAAACGAGACCGGCTTATGTCTCCGAAA  
GCTTCCACATGGTAGTATCGACGGTATGCGAAAACCGTGAATGGCTGCCGTCCACCGCGAAAATTTGCTGAGGGTGGGAGGAAACCAGGCCAGGTT  
GTCTCTTCTCTATTTCACATTC AATCCTACTTCAAAGAAAACCTTTTGGATGAACCCGAAGAACAAGCGGAACCGGCAAACCATCCAATGCGCCTT  
TGACAGAGGAAAATGGCGACTTTCACCAATCTAGGGTTATCGAGAAGGCTTGCAGCCATCTATCGACTAAACTCGATATGAAAGCTCCGACCGC  
CATTCAAAAAGCATCTGCACAGCAGTTGGTATCGGACGATAGCGATGCTTTCATACAAGCAGAGACTGGATCTGGAAAACCTTTGGCATATCTA  
CTACCTATAGTTCGAGCGAATATTAGCATTGAGTGAGAAATGGCGTACAAA

>Bcin02g07770 (MLST9), partial sequence [organism=Botrytis cinerea, strain D13\_MR\_S11]  
CAGCTTTCCCTTTCCGTTCTGGCATCTACAGTCAATGCCATCCCTACACCATCACAACCTTGAGTCTCGGGCCGTTATCGATTCCGATGCCGTTG  
TAGGATTTGCCGAAAACCTGTTCCAGTGGGACCGTAGGAACAGTTTATGAGGCATATAAACCATTCCTTAAAGTCGTAATGGATGCGTACCATT  
CCCTGCCGTCGATGCATCGGGTAACACAGGGTATGTCTTATATCTTTCTCTTCCACACGATTGCTATTGAGTCTCTAACATATTTTAGTGGTG  
GTTTGTACCAACTGGCAGTAGCAATGGTGGTTGCAGCAGCAGTACCGGTCAAGTATATGTTTCGAGGGGACAAAGCGGATCAAACCTACGCCATC

```
ATGTACTCCTGGTAAGTTCTCTCTAAACTTCTCCTTATAGATCCAACCTAACAAAATCTTAGGTACATGCCAAAGGACGAGCCCTCAACCGGTA
TTGGTCACCGTCACGATTGGGAAGGTGTAATTGTCTGGCTCTCCAGCGCCACCGCCACAACCTGCCGACAACATCTTAGCCGTTTGTCTTCCGC
CCACGGAGGCTGGGATTGTTCCACGGATGGCTATTCCTTTCTGGTACCAGCCCTCTTATCAAGTACGAAAGTATCTGGCCCGTCGATCACTCA
ATGGGTCTTACTAGTACTGTTGGTGGAAAAACAACCTATGATTGCTTGGGAGTCTTTACCAACTGCTGCTCAAACCTGCTCTTGAGAACACCGATT
TCGGTGCTGCGAATGTTCCATTCAATTCGGCTGTTTTTCACAGACAATCT
```

>Bcin01g07220 (MLST1), partial sequence [organism=Botrytis cinerea, strain D13\_E\_IL7]

```
ATGGCATATCCTGTTTTCTTTTCGCATTATGCTTTGGAACGTGCTGGACAAGCTTGGTTAGTGCTCTGCGTGTAGAAGCACTAAAGAAGATTCTC
GCACACCGAAGTCATGGTTGAGGAATCCAGGAATTCACCTGGCCGTTGAACGAAGTTTGGATAGGAACCTGAGGAAATGCGTAATCTCGTTG
GCCGCTTTGCTGGTATTGTATTACAGCATTTTTATGCTATTGATATCATCATTTGGGCTTTTATGAATACATGGAAACTGACATTAGTCTCGA
TGGCAACTGGCCAGTTATATACGCTGTCAACAAAACGTTCAATCGCGTGAGTGGAAAAATGGGAAAAACAAGTGAACCTACGCCCTGAAATGACC
ACTGGCATATTTTTCAGAGACTTTCTCCAACATCAAAGTGGTTTCGGCTTTTACTCTGGAACCTTACTTTGAGACAAAACACACCAAAGCTACAGA
AGAACTTTATAAAGTTGGACTAATACGAGCAAACCTACTCGGGATTGCTGTGGGGATTGACAGATGCGATGTCATTCTTCATCACTGCAACTATC
TTTTATTATGCCACGGTTCTCATTACCAAGAGAGAGATCAGTATCGCGACTGCACCTACAGACTGTCAATCTTCTATTATTGTATTTCTAATAGTA
CGAATATGCTGGCCATGATACCACAAAATCAAACCTTCTCGCGTTACAGCTACGCATATGCTTGCATTAGCCAATCTCGATTTCATCTTCTCCAC
GAAAATAAAGGAACGAACGGCTTTTCGACATCTTTCCAATCAAATCAACCGTCTCTCATTACATACCCCTACTCGTCTGAAAAACGAACGATAT
CATCCTTTTCTCTTTCCCTGATTCTTAACCTCAACAACCTGCACCTGTGCGACCCTCCGGCTCCGAAAACTACAATAGCTGCTCTGCTCATTTGG
TCTCTATCCGCCAGATACTTCAACACCTCCACCGTTGACATTTCAATCGCGTCTCCATAAGTAACTGTCACATTCGGTCTCTCCGGGCTTCTCTC
TCACTCGTTCACAAAATACCGATTCTATTTCCAGCTACCATTCTCCATAACATCATTTATGGTCTCCAGAATCTTCTCCTTGTGCTAGTCTTC
CATCAGCTATTGCATCAGCAAAAGATGCTGGGATCCATGAATTTATCACATCGCTTCCACAAGGCTATGATACTAT
```

>Bcin05g07690 (MLST2), partial sequence [organism=Botrytis cinerea, strain D13\_E\_IL7]

```
CACCACTATCACCAAGTCCTTTTCTGCACTTTCTCATCAAAAACGAACGAGAATCATCAATAAATACTTTGCTGAAGTAATTGGGTTTTTAT
TTTGCCAGGATGCCTTCTCTACGACAGCAAGCCTTCGATGATACGTTGTGGTAGTTCTTGGCTGGCTGGATACTGTCAAATTCATTGATT
TACATTCTGAATTGCACTATTCAAACGACTCTCAGCCAGAATGGTACGGACAACAATATAAACCTGCATTTGCACATCGAGCGCGACTATTTTG
GGAATTGGCTTCAACAGGATGGGATACTACTCTCTGTGGTGGTGGGATGATATGGTACCATAACCTTACTCCATACAAGAACGCAATTACCAAT
GAACTCTATATCGCAGCTTCGATATCGATGTACCCATATTTCCCGGAGATGACAATCAATCCCATTTATGATTTCCAACCTTCATATCCAC
CTCACGATCCGAAATATCTACAGGCAGCTGTTGATGCTTACAAAATGGCTGAATGGTTCCAACATGACGGATTACAAGGATTAATGTGCGACGG
GTACCATATCTCGAATCTTTCTGGCGGTGAAAAACCCCATTTGCGATTCTAGAAAATGAGATGGTATATACCTACAATCAAGGTGTTTTGCTTACT
GGACAACGTGGTTTTGTATGACGCAACCGCCGCACGATCATACCTTGTAGATGGCCACAACTCATCGCAATGTTATTAATGCCACAGGCTATG
ACCTGAAACACAATGTTGTATCTCACCGCCACCCAAAGATGGTTCCGCATTGGCAAAGTGGTTTTGGCCTGGGTAGGAATGGAATACTGGAAGA
AGGATGCGATTCAAGTGTCTCGTGTCTCAAATGGACAAAATTTCAAAGGCATATTTCTTTTCACTTGTATTGCGTTCTGTAGTGAATTTGCCAG
GGGAGCCTATTGCAGGGACGAAGGAAAAGCTTAGAACTCGACAGAGTGTGGCATTCTGACAAAATGCTCACAGTATACAAAAT
```

>Bcin06g01710 (MLST3), partial sequence [organism=Botrytis cinerea, strain D13\_E\_IL7]

```
GTGAGTCTGACTTTTTTATTTGAGCATTAAGATAGACACTGATATACCAAGGCAATCACCTAATTTTATGCGCTTCTTCCCTGCATCATCTACC
TACCCTGGAATGCTGGGAGAATTTACTCAGCAGCTCTCACAGCACCTGCTTTCAATTTGGATCTGTTCCCTGCTGTGACAGAATTTGGAGACGG
TTGTAATGGATTGGCTGGCCAAGCTTCTCAATCTCCAGACTGTTATTTGTCTTCGACTCATGGTGGTGGTGTATCCAAGGATCAGCCTCGGA
AGCTGTGCTTACCGTTATGGTTGCTGCCCGGATAAAATATCTTCGTGAACTACTGAAGGTCTGTCCGGTATTGAACTCGAGGATGCGATTGCA
TATAAAAAGGAGTAAGCTAGTTGCACTAGGAAGCGAAAATGGCACACAGTTCCACGCGAAGCAGCGCAGATAGCTGGCGTTAGATTCCGATCGA
TTCCAGTACTCGCATCCAATGATTTTCGCCATGACGGGTGATGATTTAGAGAAGGTATTTGAAAGAATGCAAATCTCAGGGATTGGAACCTTCTA
TCTAACTTCGACTTTGGGAACAACATCTACATGCGCAGTTGACGACTTCGCATCTATTACAACAGTACTTTCAAATAATGCACCTCCAGATGTT
GCAGGCGAGATCTGGGTTACGTCGATGCTGCTTATGCAGGTGCAGCTTTGGTTTTGCCCTGAATACCATCATCTAACATCGTCTTCCAGCATT
TCCATTCTTTCGATATGAACATGCACAAAATGGCTTCTGACAAAATTTGACGCTTCTTGTCTATATGTCAAGAAAACGCAAAGATCTGATCGATGC
ACTATCCATAACACCAAGTTATCTTCGCAACGAGTTTTTCAGAGAGTGGACTCGTAACCGACTATCGTACTGGCAAATTCCTCTCGGAAGACGC
TTCCGAAGCTTAAAGATTTGGTTTTGTCTCAGAACCCTAC
```

>Bcin11g01310 (MLST5), partial sequence [organism=Botrytis cinerea, strain D13\_E\_IL7]

```
GGACTGACATGGACCTCATGTGGAACCGGCTAGAATGCGCAACGCTTGAAGTTCCGCTCGAATATGGCGATGCAACGTCAACGGCAAAGCCA
GTGTTGCGCTTGCTCGTTATCTGCCACTGTTGCCGCGAGCAAGAAGCTCGGGTCTCTCTTGATAAACCCCGGTGGACCCGGTGCCTCTGGTGT
TGGCTTTGTGCACTCTGGAGCCGGTGCCCGCTCTCGACACTGAGTGGTGGATTGTACGATATCATCGGATGGGATCCACGTGGAACCGGTGCT
TCGGCTCCTATTTTGAATGTTTTGCAAATGCCAGTGCAGGATGATTTTTAACAACGCGTTTTCCATCTGCTCCGAATCTCTGGCTCGGACAAT
TTGCGAATGCCAGCGCAAATTTGCTGTTAGCTCTGCTATCACATCCTTTGACACTTCTGTGCTGCTCTTGCAAAAGCTTGGCTGGCTCAGAA
ATCTCCCGCTCTTTACACCTCAACAGCAGCATATGTTGCTCGAGACATGGCAGCGATAGTCGATGCATTGGATGGGACCTCTGCAAAACTTAACT
TACTGGGGTTTCTCATATGGAACATTTTTTCTAGCTGAGTTTATCCAACTTTCCAGGCCGCGTGGGAAGAGTTCTTGCCGATGGTGTTCG
ACGCAAAGGCAAATGCACTCACATACGTTAGCCAACCTCCCAACGATCAACTCAGTGTTCGTGCTTCTGTTGAACGATTTTGCAGCTTTCTGCAC
CACCGCCGGTAGTAAAGGTTGCTCTTTTGCACCCGCCCTACTGGAACCTCAGGACTGTTGCTACCAGACTGGACAACATAATGAAAGATATG
```

TTCTCAATCCTATTGTTGCTTCGGGCTTAAGCATCA

>Bcin15g03910 (MLST6), partial sequence [organism=Botrytis cinerea, strain D13\_E\_IL7]

GCCAAAAACACGAAATCATCCAACGATGAAGATGATACTCCACTTCCCTTGATTATCTGGCATGGACTCGGCGATAATTACAAAGCGGATGGTCT  
TGCGCAAGTTGGAAAAGTCTGCTGAAGCTATTCATCTGGACTTTTGTCTACAATATTCATGTAGATGAGGATGCATCTGCAGATAGGACAGCTA  
CCTTCTTTGGAAATCTCACTCGTGAGTACATTCCTATTTTCTTTAAATATCATACTAACTCTCTTACCAAGTTCAAATCGAAAAGGTCTGC  
GAAGACCTCGCTCCCATCTATTTCTCTTACCGCGCCCGCCGTCGACGCAATTGGATTCTCCCAAGGCGGCCAATTTCTGCGTGGTTACATAT  
CCCGCTGCAATGCTCCACCCATCCGCTCTCTCTGACCTTCGGTTCCCAACACAACGGCATTTCTGCCTTCCAAGCCTGTGGTCTGCCGATTT  
CCTCTGTGCGGGTCTCAAACCTTTTGGGATCCAACACCTGGTCAACCTTTGTCCAATCTCGTCTCGTACCCGCTCAATACCTCAGAGATCCG  
GAAAACCTAGACTCTTACCTTGAATATTTCCAATTTCTTGGCGACATCAATAATGAGCGCGTTCTCAAGAACCAAACATATAAAATCCAACATGG  
AAAAATTTGGAACGATTCGTAATGTATGTCTTTGAAGACGACACAACCTGTCATCCCTAAGGAAAGTGGATGGTGGGCTGAAGTCAACGGCACGGGA  
AGTTACACCCTGAAAAGAAAGAGCCATTTATAAAAGAAAGATTGGCTAGGTTTAAAGACATTGGATGAGGCGGAAAATTAGTTTTCGAAACCATT  
CCAGGGGACATATGACGTTAGGAGAGGAGATGCTAGAGAAGGCTTTCAAAGAGTATTTTGGTCCAGCAGGGAAGAAATTTGGG

>Bcin16g03460 (MLST7), partial sequence [organism=Botrytis cinerea, strain D13\_E\_IL7]

ATGAACCTCTTAATTTGAACTCTTCATTATTTGCAAGTGATGAACCCCTATTCTGCCAGAGGATAGTTACAAGACGTATATCATTAGTCGAGA  
ACCCTCATGATATATATGACGGATTTTGGAAAGCGAATGAAAGTAGACACTTGGTTGATGTTAGGTGTGTTATTTATTTCTGATGAAATGAACA  
AGAGAGACTGATGAGATAGTGAACCGCTTATGAACCGTCTACTGTTTCTCACGGGCGAGGAAAGTTACCATTGATACCTCAGTTTCGAAATTTCTGA  
AGTGGCGGTTTTAGAGAGGGATGAGGTGGTCAAGTGTATTGACATAGAGCGAGGGCATTTCAAGGGTGGAGGGCGAGATGGGGATTGAGAAGT  
TGAGGACGCGAGGATGGGGTTGGAGGACATTTATGGGATGCATTTGTAAGTTTTGGGGATTGACGAAGGCTTTTGTCTATTTTCTACCAGTAC  
GGATCTTGAAGAAAAGATAGCATGAACACGAGGGCTAATAACTAGGAAATAGCGATTGGAGTGGAGGTAAACGTGGCATAGACCGATTTAGTAC  
TTTCATGGTCTATGTGACGCTATCCTCTGATATCGAAGGTGGAGGAACGGAAATCCACGATATCGTGGGACCAAAGGAGGAAGGTGGGAGGAC  
TTCTTGAAAACCTACGGAAGCATTGGATCCAAGAACTGGAGAAAATGTAACAGTAGAAGGGGTGACATTTCAAACCAATCAAGGAAATGCCGTAT  
TCTGGGAAAATACTGACAACAACGGGAGGGGCTATGAT

>Bcin12g03020 (MLST8), partial sequence [organism=Botrytis cinerea, strain D13\_E\_IL7]

TCGATTGCTGCGAAGAAAAGTGCAGCAGCAGGAGTACCCAAAAGCAGCAATAAACCATCGGCAAGGAAATATTTCTCTGAACCACAACATGACA  
CGAGCGCGAAGAGTATATCGGGCGAGAAGCTTCATCAAGAGCACCAAAGCGACAACGAGTGCATGATAAATTAACCTTACGGTGGAAAGAAA  
TGAAAATACAGCAGCTTATGCTTCCGGGAAAAGTTCATCTGGAAAGTATAAATGTTGGTGGAGGCAGGAAGACCCTTTTCAAGAAGAACCACGA  
ACGGCATTGTCGCTGGCAAGTTGCCCCCTGGAAAGTATCAACATTTGGTGGAAAGAAGGCTACCCAAATCGAGGACGAGGGTAGAGCAGCTTATG  
CTTCCGAAAATTTGCCCTCAGGAAGTATAAACTCTGGCGCAAAGAAGGCGATTTCAATCCAAGATGAAACGAGACCGGCTTATGTCTCCGAAA  
GCTTCCACATGGTAGTATCGACGGTATGCGAAAACCGTGAATGGCTGCCGTCCACCGCGAAAATTTGCTGAGGGTGGGAGGAAACCAGGCCAGGTT  
GTCTCTTCTCTATTACATTTCAATCTTCAAAAGAAAAGTCTTTGATGAACCCGAAAGAACAAAGCGGAACCGCAAACCATCCAATGCGCCTTT  
GACAGAGGAAATGGCGACTTTACCAATCTAGGGTTATCGAGAAGGCTTGCAGCCCATCTATCGACTAAACTCGATATGAAAGCTCCGACCGCC  
ATTCAAAAGCATCTGTACAGCAGTTGGTATCGGACGATAGCGATGCTTTTACATAAAGCAGAGACTGGATCTGGAAAACCTTTGGCATATCTAC  
TACCTATAGTCGAGCGAATATTAGCATTTGAGTGAGAATGGCGTACAAA

>Bcin02g07770 (MLST9), partial sequence [organism=Botrytis cinerea, strain D13\_E\_IL7]

CAGCTTTCCCTTTCCGCTTGGCATCTACAGTCATTGCCATCCCTACACCATCACAACCTTGAGTCTCGGGCCGTTATCGATTCCGATGCCGTTG  
TAGGATTTGCCGAAAAGTGTCCAGTGGGACCGTAGGAAACAGTTTATGAGGCATATAAACCATTCCTTAAAGTCGTAAATGGATGCGTACCATT  
CCCTGCCGTCGATGCATCGGGTAACACAGGGTATGTCCCTTATACCTTTCTCTTCCACACGATTGCTATTGAGTCTCTAACATATTTTAGTGGTG  
GTTTGTCAACAACTGGCAGCAGCAATGGTGAATGCAGCAGCAGTACCGGTCAAGTATATGTTTCGAGGAGGACAAAGCGGATCAAACCTACGCTAT  
CATGTACTCTGGTAAGTTCTCTCTAAACTTCTCTTATAGATCCAACCTAACAAAATCTTAGGTACATGCCAAAGGACGAGCCCTCAACCGGT  
ATTGGTCAACCGTACAGATTGGGAAGGTGTAATTTGCTGGCTCTCCAGCGCCACCGCCACAACCTGCCGACAACATCTTAGCCGTTTGTCTTCCG  
CCCACGGAGGCTGGGATTGTTCCACGGATGGCTATTTCCCTTTCTGGTACCAGCCCTCTTATCAAGTACGAAAGTATCTGGCCCGTCGATCACTC  
AATGGGTCTTACTAGTACTGTTGGTGGAAAACAACCTATGATTGCTTGGGAGTCTTTACCAACTGCTGCTCAAACCTGCTCTTGAGAACACCGAT  
TTCCGGTGTGCGAATGTTCCATTCATTTCCGGCTGTTTTACAGACAATCT

>Bcin04g02090 (MLST10), partial sequence [organism=Botrytis cinerea, strain D13\_E\_IL7]

CGGAGGATGATATGGCAAAGTCTATGATTACCAAAGCATTTGTAGGCATGAGTAGTAAACTGTCGAATATGACTATGAATGATGTTTACAAGCC  
CTACATCCATGTAAGAAAATGTAGAATAGAGAGATCAGTAACTGGAACATAATATCGTTTTGTAGGCTTTCAAGTTACTTACGCAGTTCAACCCAAAT  
CACTACAGCTATTGCCGAATCCCCACTATTTCAAATGGCTGTCTCAGCAAATACCATCGAAAAGTACACACTGCTAGGCCCTTTCTTCAAGAATA  
TCTCCTCTGCAACAGGAAGTTACCAGGGAATACTTCACTGCGCCAAAGACGATAGATAGGCGACACATTTGCCACATCTCAAGATGCCCTTACGAT  
TGACCTTACAAAACCATCAAAAAGATTTACTTGTATATCATCAACCACTTTGTTTCGAGCAAGTCCAATCGAAAAAGCAAACCCCTGGATTGGTT  
CGCTTACATTTGTGAATCAAAAATCACAAGCGTCGAGCACTTCAGGTAGACCCGAAAGAGTGTCTTCTGATGGCTTTATGCACAATGTCACCTGTC  
GTTCTAGATGGTCTTTGTGAGCCATTCATGGATACCACATTTCTGAAAATTTCAAGATTGATATTGATTATCTAAGACGTGCGCCCTCGTGTAG  
ATATCAAGGACGAGACCAAGTTGAACGCTGACGAGAAGGCTTCTGAGAAGTATTTATGAGGACACTGTTCTGGCACCTTCAATTTCTATCTCTGA

GGTCTTCTTTCTCACATTGGCTGCTCATCATTATGGTAGTGAAGCTCTTAATGCCACGCATAAGAGTCTGGAGAAAGACATCAAATATATTCAA  
AAGCAATTGACTGCCGTTGAAGCA

>Bcin01g07220 (MLST1), partial sequence [organism=Botrytis cinerea, strain D13\_MR\_S2]

ATGGCATATCTTGTCTTTTCGCATTATGCTTTGGAACGTGCTGGACAAGCTTGGGTTAGTGTCTCTGCGTGTAGAAGCACTAAAGAAGATTCT  
CGACAACCGAAGTCATGGTTTGAGGAATCCAGGAATTCACCTAGCCGGTTGAACGAAGTTTTGGATAGGAACCTCGAGAAATGCGTAATCTC  
GTTGGCCGCTTTGCTGGTATTGTATTACAGCATTTTTTATGCTATTGATATCAATCATTGGGCTTTTGTGAATACATGGAAACTGACATTAG  
TCTCGATGGCAACTGGGCCAGTTATATACGCTGTCCACAAAACATTC AATCGCGTGAGTGGAAAATGGGAAAACAAGTGCAACTACGCCCTCTGA  
AATGACCACTGGCATATTTTCAGAGACTTTCTCCAACATCAAAGTGGTTCGGGCTTTTACTCTGGAACTTACTTTGAGACAAAACACACAAA  
GCTACAGAAGAACTTTATAAAGTTGGACTAATACGAGCAAACTACTCGGGATTGCTGTGGGGACTGACAGATGCGATGTCATTTCTCATCCTG  
CAACTATCTTTTATTATGCCACGGTTCTCATTACCAAGAGAGAGATCAGTATCGCGACTGCACTACAGACTGTCAATCTTCTATTATTTGGTAT  
TTCTAATAGTACGAATATGCTGGCCATGATACCACAAAATCAACTCTTCTCGCGTTACAGCTACGCATATGCTTGCATTAGCCAATCTCGATTCA  
TCTTCTCCACGAAAATAAAGGAACCGAACGGCTTTTCGACAATCTTTCCAATCAAATTC AACCCTTTTCAATCACATACCCTACTCGTCTG  
AAAAACGAACGATATCATCTTTTCTCTTTCCCTGATTCTTAACCACTCAACAACGCACTTGTTCGGACCCCTCCGGCTCCGAAAATCTACAATAGC  
TGCTCTGCTCATTGGTCTCTATCCGCCAGATACTTCAACACCTCCACCCTTGACATTCAATCGCGTCTCCATAAGTAAGTGTACATTCCGCTCT  
CTCCGGGCTTCTCTCTCACTCGTTCCACAAAATACCGATTCTATTTCCAGCTACCATTCTCCATAACATCATTATGGTCTCCAGAACTTCTCT  
CTTGTGCTAGTCTTCCATCAGCTATTGCATCAGCAAAAAGATGCTGGATCCATGAATTTATCACATCGCTTCCACAAGGTTATGATACTAT

>Bcin05g07690 (MLST2), partial sequence [organism=Botrytis cinerea, strain D13\_MR\_S2]

ACCCTATCACCAAGTCTTTTCTGCACTTTCTCTCATCAAAAACGAACGAGAACATCATCAATAAATACTTTGCTGAAGTAATTGGGTTTTATT  
TTGGCCAGGATGCCTTCTCTCTACGACAGCAAGCCTTCGATGATATGTTGTGGGTAGTCTTGGCTGGCTGGATACTGTCAAATTCATTGATTT  
ACATTCTGAATTGCACTATTCAAACGACTCTCAGCCAGAAATGGTACGGACAACAATATAAACCTGCATTTGCACATCGAGCGCGACTATTTTGG  
GAATTGGCTTTCACAAGGATGGGATACTACTCTCTGTGGTGGTGGGATGATATGGTACCATACTTACTCCATAACAAGAACGCAATTACCAATG  
AACTCTATATCGCAGCTTCGATATCGATGTACCTATATTTCCCGGAGATGACAATCAATCCCATTATGATTTCCAACCTTCATATCCACC  
TCACGATCCGAAATATCTACAGGCAGCTGTTGATGCTTACAAATGGCTGAATGGTTCCAACATGACGGATTCACAAGGATTATATGTCGACGGG  
TACCATATCTCGAATCTTTCTGGCCGTGAAAACACCCATTGCGATTCTAGAAATGAGATGGTATATACCTACAATCAAGGTGTTTTGCTTACTG  
GACAACGTGGTTTTGTATGACGCAACCCGCGCAGATCATACCTTGTAGATGGCCACAACTCATCGCAATGTTATTAATGCCACAGGCATAGA  
CCTGAAACACAATGTTGTATCTCACCGCCACCCAAAGATGGTTCGCAATGGCAAAGTGGTTTTGGCTGGGTAGGAATGGAATACCTGGAAGAA  
GGATGCGATTCAAGTGTCTCGTGTCTCAAAAATGGACAAAATTTCAAAGGCATATCTTTTCACTCACTTGATTGCGTCTGTAGTATTGCCAG  
GGGAGCCTATTGCAAGGACGAAGGAAAGCTTAGAACTCGACAGAGTGTGGCATTCTGACAAATGCTCACAGTATACAAAAT

>Bcin06g01710 (MLST3), partial sequence [organism=Botrytis cinerea, strain D13\_MR\_S2]

GTGAGTCTGACTTTTGTATTTGAGCGTTAAGATAGACACTGATATACCAAGGCAATCACCTAATTTTCATGGCGTTCTTCCCTGCATCATCTACC  
TACCCTGGAATGCTGGGAGAATTATACTCAGCAGCTTTTCACAGCACCTGCTTTCAATTGGATCTGTTCCCTGCTGTGACAGAATTGGAGACGG  
TTGTAATGGATTGGCTGGCAAGCTTCTCAATCTCCAGACTGTTATTTGTCTTCGACTCATGGTGGTGGTGTATCCAAGGATCAGCTTCGGA  
AGCTATCGTTACCGTTATGGTTGCTGCCCGGATAAATATCTTCGTGAACTACTGAAGGTCGTTCGGGCATTGAGCTCGAGGATGCGATTGCA  
TATAAGAGGAGTAAGCTAGTTGCACTAGGAAGCGAAATGGCACACAGCTCCACGCGAGAAAGCAGCGCAAATAGCTGGCGTTAGATTCCGATCGA  
TTCCAGTACTCGCATCCAATGATTTCCGCATGACGGGTGATGATTTAGAGAAGGTGTTGAAAGAATGCAAATCTCAAGGATTGGAACCTTCTA  
TCTAACTTCGACTTTGGGAACAACATCTACATGCGCAGTTGACGACTTCGCATCTATTGCAACAGTACTTTCAAATATGCACCTCCAGATGTT  
GCAGGCGAGATCTGGGTTACGTCGATGCTGCTTATGCAGGTGCAGCTTTGGTTTGCCCTGAATACCATCATCTAACATCGTCTTCCAGCAT  
TCCATTCTTCGATATGAACATGCACAAAATGGCTTCTGACAAAATTTTCGACGCTTCTTGTCTATATGTCAAGAAACGCAAAGATCTGATCGATG  
ACTCTCCATAACACCAAGTTATCTTCGCAACGAGTTTTTCAGAGAGTGGACTCGTAACCGACTATCGGGACTGGCAAATTCCTCTCGGAAGACGC  
TTCCGAAGCTTAAAGATTTGGTTTTGTCTCAGAACCCTACGG

>Bcin09g03030 (MLST4), partial sequence [organism=Botrytis cinerea, strain D13\_MR\_S2]

ACCCTTCAACCCACCGCAGCTCTATACCGAAAGCGAGTATCTTACCAATTTCTCTTCCACCTGCGACTTTAAGACCATTGGCTTTCCGCACT  
TTCACAAAAAAGCATAGTTTAAACATTTGACGTCGTCGGCATTACAAGTGTGGCTACTTTTATTTGAAAAGCATTTGTGGGACAGGATGGAGGGAAG  
AAGGACTGGCAGAGAGAGTCTTGGAGGAGGTCGCCAAGAGTTGGAAGAATAGGAGTGGCGGTGTCAATTTGTCGAGGGCGAGGGAACGGAATTGAA  
GGAGATTCTGAAAGCTTTGGAAGGGAATATGAGTGGTGAAGGATAGTCAATAGGAAGAGAGCTAAGCCGGCAGAATAGTTTAGTACTGGGATCA  
TCACAATATGGAGAGGTCAATCATACAAGACTTTGGGCTACGGCCAGGGAATATACCAGAGAGGATAGTCAAGTCAAGTTTGGGAATGTCAACGT  
TGGAGGTCAATGACGAGGAAGATGAGGATGGCCTGATGGATCCAAGAAGTGGTTAAAAGTCAATTTGATGCAATTTGAGCAACCTCGACTGGTGT  
CAATGTTGCTAAAAAGCACTTTGATAGGTATGTTTCAATGATAAAAATTCATCTGAATCGACTAATCAGTACAGAGATACCTCCAAACCTTCA  
TTGTTCCACCTGCGTCTCATAAAAACCTCTCTTCCAAAACCGCTATAATGTTATCCATCAACGTCTCTTTCGCAATGAATCTTTTCAAACGC  
CCGCTTTTCAAGGTGGCAAATCTTCCCTTCAACGCGACGCTCCGCCATTACCACCCAACAACAATCATACAAAATTAACGCCGATAGCTAATCT  
TCTCGGTGCGAATCGCAGCTCTCATATGCTTCTCGGTCTCCTCAGTATTTCAACCACTGGTACCCTCGCCATCAATGACCTGACGGGCAGTATC  
GCTCTCGATCTTACACACGCAGCAGCCATTCC

>Bcin11g01310 (MLST5), partial sequence [organism=Botrytis cinerea, strain D13\_MR\_S2]  
ACTGACATGGACCTCATGTGAAACCGGCGTAGAATGCGCAACGCTTGAAGTTCCGCTCGAATATGGCGATGCAACGTCAACGGCAAAGCCAGT  
GTTGCGCTTGCTCGTTATCTGCCACTGTTGCCGCGAGCAAGAAGCTCGGGTCTCTCTTGATAAAATCCGGTGGACCCGGTGCCTCTGGTGTGG  
CTTTGTGCAGTCTGGAGCCGGTGCCGCCGCTCTCGACACTGAGTGGTGGATTGTACGATATCATCGGATGGGATCCACGTGGAACCCGGTGCCTTCG  
GCTCCTATTTTGAATGTTTTGCAAAATGCCAGTGCAGGATATGATTTTAAACAACGCGTTTCCATCTGCTCCGAATCTCTGGCTCGGATAATTTG  
CGAATGCCAGCGCAAATCTGCTGTTAGCTCTGCTATCACATCCTTTGACACTTCTGTGCTGCTCTTGCAAAAGCTTGCCTGGCTCAGAAATC  
TCCCCTCTTTACACCTCAACAGCAGCATATGTTGCTCGAGACATGGCAGCGATAGTCGATGCATTGGATGGGACCTCTGCAAAACTTAACTAC  
TGGGGTTTTCTCATATGGAACATTTTTCTAGCTGAGTTTATCCAACTTTCCAGGCCGCGTGGGAAGAGTTCTTGGCGATGGTGTTCGACG  
CAAAGGCAAATGCACTCACATACGTTAGCCAACTTCCCAACGATCAACTCAGTGTTCGTGCTTCGTTGAACGATTTTGCAGCTTTCTGCACCAC  
CGCCGGTAGTAAAGGTTGCTCTTTTGCCACCGCCCTACTGGAACCACAGGTACTGTTGCTACCAGACTGGACAACATAATGAAGGATATGTTT  
CTCAATCCTATTGTTGCTTCGGGCTTAAGCATCA

>Bcin15g03910 (MLST6), partial sequence [organism=Botrytis cinerea, strain D13\_MR\_S2]  
TCGCCAAAACACAAAATCATCCAACGATGAAGATGATACTCCACTTCCCTTGATTATTTGGCATGGACTCGGCGATAATTACAAAGCGGATGGT  
CTTGCGCAAGTTGGAAAAGTAGCTGAAGCTATTCATCTGGGACTTTTTGTCTACAATATTCATGTAGATGAGGATGCATCTGCAGATAGGACAG  
CTACCTTCTTTGAAAATCTCACTCGTGAGTACATCCCCTATTTTCCCTTTAAATACCATACTAACTCTCTTACCAAGTTCAAAATCGAAAAGGTC  
TGCGAAGACCTCGCCTCCATCCTATTTCTCTACCGCGCCCGCGTGCAGCGCAATTGGATTCTCCAAGGCCGCAATTTCTTGCCTGGTTACA  
TATCCCCTGCAATGCTCCACCCATCCGCTCTCTCTGACCTTCGGTTCCCAACACAACGGCATTTCTGCCTTCCAAGCTGTGGTTCCTGCCG  
ATTTCTCTGTGCGGGTGCCTCAAACCTTTTGGGATCCAACACCTGGTCAACCTTTGTCCAATCTCGTCTCGTACCCGCTCAATACTTCAGAGA  
TCCGGAAAACCTAGACTCTTACCTTGAATATTTCCAATTTCCCTTGGCGACATCAATAATGAGCGGTTCTCAAGAACCAAACATATAAATCCAAC  
ATGGAAAATTTGGAACGATTCGTAATGTATGTCTTTGAAGACGATACAACGTGCATCCCTAAGGAAAGTGGATGGTGGGCTGAAGTCAACGGCA  
CGGAAGTTACACCCTGAAAAGAAAAGACCATTATATAAAAAGAAAGATTGGCTAGGTTTAAAGACATTGGATGAGGCCGAAAATTAGTTTTCGAAA  
CCATTCCAGGGGGACATATGACGTTAGGAGAGGAGATGCTAGAGAAGGCTTTCAAAGAGTATTTTGGTCCAGCAGGGAAGAAATTTGGG

>Bcin16g03460 (MLST7), partial sequence [organism=Botrytis cinerea, strain D13\_MR\_S2]  
ATGAACCTCTTGATTTGAACTCTTCATTAATTTGCAAGTGATGAACCCCTATTTCTGCCAGAGGATAGTTACAAGACGTATATCATTAGTCGAGA  
ACCCTCATGATATATATTGACGGATTTTTGAAAAGCGAATGAAAGTAAACATTTGGTTGATGTTAGGTGTGTTATTTATTTCTGATGAAATGAAC  
AAGAGAGACTGATGAGATAGTGAGCCGCTTTATGAACCGTCAACTGTTTCTCACGGACAGGAAGTTACCATTGATCCTTCAGTTCCGAAATCTG  
AAGTGGCGGTCTTAGAGAGGGATGAGGTGGTCAAGGTGATTTGAGCATAGAGCGAGGGCATTTCAAGGGTGGAGGGGCGAGATGGGGATTGAGAA  
GTTGAGGACGCGAGGATGAGGGTTGGAGGACATTATGGGATGCATTTGTAAGTTTTGGGGATTGACGAAGGCTTCTGTCTATTTTCTATCAG  
CACGGATCTTGAAAAGAAAGATAGCATGAACACGCGGGCTAATAACTAGGAAATAGCGATTGGAGCGGAGGTAAACGTGGCATAGACCATTAG  
TACTTTTATGGTCTATGTCGACGTATCCTCTGATATCGAAGGTGGAGGAACGGAAATTTCCACGTATTTGTTGGGACCAAAGGAGGAAGGTGGGAG  
GACTTCTTGAAAACCTACGGAAGCATTTGGATCCAAGAACTGGAGAAAAATGTAACAGTAGAAGGGGTGACATTCAAACCAATCAAGGGAAATGCC  
TATTCTGGGAAAATACTGACAACAACGGGAGGGGCTATGAT

>Bcin12g03020 (MLST8), partial sequence [organism=Botrytis cinerea, strain D13\_MR\_S2]  
CGATTGGCTGCGAAGAAAAGTAGCGCAGCACCAGTCAACAAAAGCACGAATAAACCATCGGCAAGGAAATATTTCTCTGAACCACAACATGACA  
CGAGCGCGAAGAGTATATCGGGCGAGAAGCTTCATCAAGAGCACCAAAGCGACAACGAGTCGATGATAATTATAACTCTTACGGTGGAAAGAAA  
TGAAAATACAGCAGCTTATGCTTCCGGGAACTTCCATCTGGAAGTATAAATGTTGGTGGAGGTAGGAAGACCCTTTTCAAGAAGAACCTCGA  
ACGGCATTTGTGCTGGCAAGTTGCCCCCTGGAAGTATCAACATTTGGTGGAAAAGAGGCTACCCAAATCGAGGACGAGGGTAGAGCAGCTTATG  
CTTCCGGAAAATTTGCCCCAGGAAGTATAAAGTCTGGCGCAAAGAAAGGCGATTTCAATCCAAGATGAAACGAGACCAGGCTTATGCTCCGAAA  
GCTTCCACATGGTAGTATCGACGGTATGCGAAAACCTGAAATGGCTGCCGTCCACCGCGAAAATGCTGAGGGTGGGAGGAAACCAGGCCAGGTT  
GTCTCTTCTATTTACATTTCAATCTACTTCAAAGAAAATTTGATGAACCAGAAGAACAAAGCGGAACCGGCAAACCATCCAATGCGCCTT  
TGACAGAGGAAAATGGCGACTTTACCAATCTAGGGCTATCGAGAAGGCTTGCAGCCCATCTATCGACTAAACTCGATATGAAAGCCCCGACGGC  
CATTCAAAAAGCATCTGTGCAGCAGTTGGTATCGGACGATAGCGATGCTTTCATACAAGCAGAGACTGGATCTGGAAAACCTTTGGCATATCTA  
CTACCTATAGTCGAGCGAATATTAGCATTGAGTGAGAATGGCGTACAAA

>Bcin02g07770 (MLST9), partial sequence [organism=Botrytis cinerea, strain D13\_MR\_S2]  
CAGCTTTCCCTTTCCGCTTGGCATCTACAGTCATTGCCATCCCTACACCATCACAACCTGAGTCTCGGGCCGTTATCGATTCCGATGCCGTTG  
TAGGATTGCTGAAACTGTTCCAGTGGGACCGTAGGAACAGTTTATGAGGCATATAAACCATTCTTAAAGTCGTAATGGATGCGTACCATTCT  
CCTGCCGTCGATGCATCGGGTAAACACAGGGTATGTCTTATATCTTTCTCTTCCACACGATTTGCTATTGAGTCTCTAACATATTTTAGTGGTGG  
TTTGTACCAACTGGCAGTAGCAATGGTGGTTGCAGCAGCAGTACCGGTCAAGTATATGTTGAGGAGGACAAAGCGGATCAAACCTACGCCATC  
ATGTACTCCTGGTAAGTTCTCTTAACTTCTCTTATAGATCCAACCTAACAAAATCTTAGGTACATGCCAAAGGACGAGCCCTCAACCGGTA  
TTGGTACCGTACGATTTGGGAAGGTGTAATTTGCTGGCTCTCCAGCGCCACCGCCACAACCTGCCGACAACATCTTAGCCGTTTTGTCTTCCG  
CCACGGAGGCTGGGATTTGCCACGGATGGCTATTTCCCTTTCTGGTACCAGCCCTCTTATCAAGTACGAAAGTATCTGGCCCGTCGATCACTCA  
ATGGGTCTTACTAGTACTGTTGGTGGAAAACAACCTATGATTGCTTGGGAGTCTTTACCAACTGCTGCTCAAACCTGCTCTTGGAAACACCGATT  
TCGGTGTGCGAATGTTCCATTCATTCGGCTGTTTTACAGACAATCTT

>Bcin04g02090 (MLST10), partial sequence [organism=Botrytis cinerea, strain D13\_MR\_S2]  
CGGAGGATGATATGGCAAAGTCTATGATTACCAAAGCATTTGTAGGCATGAGTAGTAAACTGTGCGAATATGACTATGAATGATGTTTTACAAGTC  
CTACATCCATGTAAGAAAATGTAGAATAGAGAGATCAGTAACTGGAACATAATATCGTTTTGTAGGCTTCAAGTTACTTACGCAGTTCAACCCAAT  
CACTACAGCTATTGCCGAATCCCCACTGTTTCAAATGGCTGTCTCAGCAAATACCATCGAAAAGTACACACTGCTAGGCCCTTCTTTCAGAATA  
TCTCCTCTGCAACAGGAAGTTACCAGGGAATACTTCACTGCGCCAAAGACGATAGATAGGCGACACATTGCCACATCTCAAGATGCGTTACGAT  
TGACCTTACAAAACCCATCAAAAAAGATTTACTTGTATATCATCAACCCTTTGTTCGAGCAAGTCCAATCGCAAAAAGCAAAAACCCCTGGATTGGTT  
CGCCTACATTGTGAATCAAAAATCACAAGCGTCGAGCACTTCAGGTAGACCCGAAAGAAGTGTCTTCTGATGGCTTTATGCACAATGTCACCTGTC  
GTTCTAGATGGTCTTTGTGAGCCATTCATGGATACCACATTTCTCGAAAATTTGGAAGATTGATATTGATTATCTAAGACGTGCGCCTCGTGTAG  
ATATCAAGGACGAGACCAAGTTGAACGCTGACGAGAAAGGCTTCTGAGAAGTATTATGAGGACACTGTTCCCTGGCACCTCTAATTTTCATCTCTGA  
GGTCTTCTTTCTCACATTGGCTGCTCATATTATGGTAGTGAAGCTCTTAATGCCACGCATAAGAGTCTGGAGAAAAGACATCAAATATATTTCAA  
AAGCAATTGACTGCCGTTGAAGCA

>Bcin01g07220 (MLST1), partial sequence [organism=Botrytis cinerea, strain D13\_MR\_S1]  
ATGGCATATCTTGTCTTTCTTTTCGCATTATGCTTTGGAACTGCTGGACAAGCTTGGGTTAGTGTCTGCGTGTAGAAGCACTAAAGAAGATTCT  
CGCACAAACCGAAGTCATGGTTTGAGGAATCCAGGAATTCACCTGGCCGTTGAACGAAGTTTGGATAGGAACCTGAGGAAATGCGTAATCTC  
GTTGGCCGCTTTGCTGGTATTGTATTCACAGCATTTTTTATGCTATTGATATCAATCATTTGGGCTTTCGTGAATACATGGAACTGACATTAG  
TCTCAATGGCGACTGGGCCAGTTATATACGCTGTCAACAAAACGTTCAATCGCGTGAGTGGAAAATGGGAAAACAAGTGAACCTACGCATCTGA  
AATGACCCTGGCATATTTTCAGAGACTTTCTCCAACATCAAAGTGGTTCCGGGCTTTTACTCTGGAACCTTACTTTGAGACAAAACACACAAA  
GCTACAGAAGAACTCTATAAAAATTTGACTAATACGAGCAAACCTACTCGGGATTGCTGTGGGGATTGACAGATGCGATGTCATTTCTCATTCTG  
CAACTATCTTTTATTATGCCACGGTCTCATTACCAAGAGAGAGATCAGTATCGCGACTGCACTGCAGACTGTCAATCTTCTATTATTTGGTAT  
TTCTAATAGTACGAATATGCTGGCCATGATACCACAAAATCAACTCTTCTCGCGTTACAGTACGCATATGCTTGCATTAGCCAATCTCGATTCA  
TCTTCTCCCACGAAAATAAAGGAGCCGAACGGCTTTCGACAATCTTTCCAATCAAATTCACAGTCTCTCATTACATATCCTACTCGTCCTG  
AAAAACGAACGATATCATCTTTTCTCTTTCCCTGATTCTTAACCAACTGCACTTGTGCGACCTCCGGCTCCGAAAATCTACAATAGC  
TGCTCTGCTCGTTGGTCTCTATCCGCCAGATACTTCAACACCTCCACCGTTGACATTCAATCGTGTCTCCATAAGTAACGTGCACATTTCCGTCT  
CTCCGGGCTTCTCTCTCACTCGTCCCACAAAATACCGATTCTATTTCCAGCTACCATTCTCCATAACATCATTTTATGGTCTCCCAGAATCTTCTC  
CTTGTGCTAGTCTTCCATCTGCTATTGCATCAGCAAAAAGATGCTGGGATCCATGAATTTATCACATCGCTTCCAAAAGGTTATGATACATATGG

>Bcin05g07690 (MLST2), partial sequence [organism=Botrytis cinerea, strain D13\_MR\_S1]  
ACCCTATCACCAAGTCCCTTTTCTGCACTTTTCTCATCAAAAACGAACGAGAACATCATCAATAAAATACTTTGCTGAAGTAATTGGGTTTTATT  
TTGGCCAGGATGCCTTCTCTCTACGACAGCAAGCCTTCGATGATATGTTGTGGGTAGTTCTTGGCTGGCTGGATACTGTCAAATTCATTGATTT  
ACATTCTGAATTGCACTATTCAAACGACTCTCAGCCAGAAATGGTACGGACAACAATATAAACCTGCATTTGCACATCGAGCGGACTATTTTGG  
GAATTGGCTTTCACAAGGATGGGATACTACTCTCTGTGGTGGTGGGATGATATGGTCACCATACTTACTCCATACAAGAACGCAATTTACCAATG  
AACTCTATATCGCAGCTTCGATATCGATGTACCTATATTTCCCCGGAGATGACAATCAATCCCCATTTATGATTTCCAACCCCTTCATATCCACC  
TCACGATCCGAAATATCTACAGGCAGCTGTTGATGCTTACAAATGGCTGAATGGTTCCAACATGACGGATTCAACAAGGATTATATGTCGACGGG  
TACCATATCTCGAATCTTTCTGGCGGTGAAAACACCCATTTGCGATTCTAGAAATGAGATGGTATATACTTACAATCAAGGTGTTTTGCTTACTG  
GACAACGTGGTTTTGTATGACGCAACC GCCGACGATCATACCTTGTAGATGGCCACAAACTCATCGCAATGTTATTAATGCCACAGGCTATGA  
CCTGAAACACAATGTTGTCATCTCACCGCCACCCAAAGATGGTTCCGCATTGGCAAAGTGGTTTTGGCCTGGGTAGGAATGGAATACCTGGAAGAA  
GGATGCGATTCAAGTGCTTCGTGTTCTCAAAAATGGACAAAATTTCAAAGGCATATTTCTTTTCATCACCTTGAATTGCGTTCTGTAGTGATTTGCCAG  
GGGAGCCTATTGCGAGGACGAAGGAAAAGCTTAGAACTCGACAGAGTGTGGCATTTCTGACAAAATGCTCACAGTATACAAAAT

>Bcin06g01710 (MLST3), partial sequence [organism=Botrytis cinerea, strain D13\_MR\_S1]  
GGTGAGTCTGACTTTTGTGTTTGGAGCTTAAAGATAGACTGATGTACCAAGGCAATCACCTAATTTTCATGGCGTTCTTCCCTGCATCATCTAC  
CTACCCTGGAATGCTGGGAGAATTATACTCAGCAGCTTTCACAGCACCTGCTTTCAATTTGGATCTGTTCCCTGCGGTGACAGAATTTGGAGACG  
GTTGTAATGGATTGGCTGGCCAAGCTTCTCAATCTCCAGACTGTTATTTGTCTTCGACTCATGGTGGTGGTGTATCCAAGGATCAGCCTCGG  
AAGCTATCGTTACCGTTATGGTTGCTGCCCAGATAAATATCTTCGTGAAACTACTGAAGGTCTGTGCGGCATTGAACTCGAGGATGCGATTGC  
ATATAAGAGGAGTAAGCTAGTTGCACTAGGAAGCGAAAATGGCACACAGCTCCACGCAGAAAGCAGCGCAGATAGCTGGCGTTAGATTTCCGATCG  
ATTCCAGTACTCGCATCCAATGATTTTCGCCATGACGGGTGATGATTTAGAGAAGGTATTGGAAGAATGCAAATCTCAAGGATTTGGAACCCCTTCT  
ATCTAACTTCGACTTTGGGAACAACATCTACATGCGCAGTTGACGACTTCGCATCTATTGCAACAGTACTTTCAAAAATATGCACCTCCAGATGT  
TGCAGGCGAGATCTGGGTTACGTCGATGCTGCTTATGCAAGTGCAGCTTTGGTTTTGCCCTGAATACCATCATCTAACATCGTCTTCCAGCAT  
TTCCATTCTTTCGATATGAACATGCACAAAATGGCTTCTGACAAAATTTGACGCTTCTTGTCTATATGTCAAGAAAACGCAAGATCTGATAGATG  
CACTCTCCATAACACCAAGTTATCTTTCGCAACGAGTTTTCAGAGAGTGGACTCGTAACCGACTATCGGGATTGGCAAATTCCTCTCGGAAGACG  
CTTCCGAAGCTTAAAGATTTGGTTTGTCTCAGAACCCTACG

>Bcin09g03030 (MLST4), partial sequence [organism=Botrytis cinerea, strain D13\_MR\_S1]  
GACCCTTCAACCCACCGCAGCTCCTATACCGAAAGCGAGTATCCTACCAATTTCTCTTCCACCTGCGACTTTAAGACCATTGGCTTTCCGCAC  
TTTCAAAAAAGCATAGTTTAAACATTGACGTCGTCGGCATTACAAGTGTGGCTACTTTTATTTGAAAGCATTGTGGGACAGGATGGAGGGAA



```
GAAGGACTGGCAGAGAGAGTCTTGGAGGAGGTGCGCCAGAGTTGGAAGAATAGGAGTGGCGGTGTCAATTGTCGAGGGCGAGGGAACGGAATTGA
AGGAGATTCTGAAAACCTTTGGAAGGGAATATGAGTGGTGGAAAGGATAGTCATAGGAAGAGAGCTAAGCCGGCAGAAATAGTTTAGTACTGGGATC
ATCACAATATGGAGAGGTCAATCATAACAAGACTTGGGCTACGGCCAGGGAATATACCCAGAGAGGATAGTCAGTCAAGTTTGGGAATGTCAACG
TTGGAGGTCAATGACGAGGAAGATGAGGATGGCCTGATGGATCCAAGAAGGTGGTTAAAAAGTCATTGATGCATTTGAGCAACCTCGACTGGTGT
ACAATGTTGCTAAAAAGCACTTTGATAGGTATGTTTCAATGATAAAATTTTCATCTGAATCGACTAACTCAGTACAGAGATACCTCCAAACCTTC
ATTGTTCCACCTGCGTCTCATAAAACACTCCTCTTCCAAAACCGCTATAATGTTATCCATCAACGTCTCCTTCGCAATGAATCTTTTCAAACG
CCCGCTTTTCAAAGTGGCAAATCTTCCCTTCAACGCAGCACGTCCGCCATTACCACCCAACAACAATCATACAAATTAACGCCGATAGCTAATC
TTCTCGGTTCGCAATCGCAGCTCTCATATGCTTCTCGGTCTCCTCAGTATTTACCCACTGGTACCCTCGCCATCAATGACCTGACGGGCAGTAT
CGCTCTCGATCTTACACACGCAGCAGCCATTC
```

```
>Bcin11g01310 (MLST5), partial sequence [organism=Botrytis cinerea, strain D13_MR_S1]
GACTGACATGGACCTCATGTGGAACCGCGTAGAATGCGCAACGCTTGAAGTTCGGCTCGAATATGGCGATGCAACGTCAACGGCAAAAGCCAG
TGTTGCGCTTGTCTGTTATCCTGCCACTGTTGCCGCGAGCAAGAAGCTCGGGTCTCTTTGATAAAACCCGGTGGACCCGGTGCCTCTGGTGT
GGCTTTGTGCAGTCTGGAGCCGGTGGCGCGTCTCGACACTGAGTGGTGGATTGTACGATATCATCGGATGGGATCCACGTGGAACCGGTGCTT
CGGCTCCTATTTTGAATGTTTTGCAAAATGCCAGTGCAGGAGTATGATTTTAAACAACGCGTTTCCATCTGCTCCGAATCTCTGGCTCGGACAATT
TGCGAATGCCAGCGCAAATCTGCTGTTAGCTCTGCTATCACATCCTTTGACACTTCTGTGCTGCTCTTGCAAAAAGCTTGCCTGGCTCAGAAA
TCTCCCGCTCTTTACACCTCAACAGCAGCATATGTTGCTCGAGACATGGCAGCGATAGTCGATGCATTTGGATGGGACCTCTGCAAACTTAACT
ACTGGGGTTTCTCATATGGAACATATTTTCTAGCTGAGTATTCAAAACCTTTCCAGGCCGTGTGGGAAGAGTCTTGCCGATGGTGTTTTCGA
CGAAAGGCAAAATGCACTCACATACGTTAGCCAACTTCCCAACGATCAACTCAGTGTTCGTGCTTCGTTGAACGATTTTGCAGCTTTCTGCACC
ACCGCCGGTAGTAAAGGTTGCTCTTTTGCCACCGCCCTACTGGAACCTCAGGTACTGTTGCTACCAGACTGGACAACATAATGAAGGATATGT
TCCTCAATCCTATTGTTGCTTCGGGCTTAAGCATCA
```

```
>Bcin15g03910 (MLST6), partial sequence [organism=Botrytis cinerea, strain D13_MR_S1]
GCCAAAACACAAAATCACCCAACGATGAAGATGATACTCCACTTCCCTTGATTATCTGGCATGGACTCGGCATAAATTACAAAGCGGATGGTCT
TGCGCAAGTTGGAAAACCTAGCTGAAGCTATTCATCCTGGGACTTTTGTCTACAATATTCATGTAGATGAGGATGCATCTGCAGATAGGACAGCT
ACCTTCTTTGGAAAATCTCACTCGTGAGTACATCCCTATTTTCTTTAAATATCATACTAACTCTTTACCAAGTTCAAATCGAAAAGGTCTGC
GAAGACCTCGCCTCCCATCCTATTCTCTCTACCGCGCCGCGCTCGACGCAATTGGATTCTCCAAGGCGGCCAATTTCTGCGTGGTTACATAT
CCCGCTGCAATGCTCCACCCATCCGCTCTCTCCTGACCTTTGGTTCCCAACACAACGGCATTCTGCCCTCCAAGCCTGTGGTCCGCGGATTT
CCTCTGTGCGGGTGTCTAAAACCTTTTGGGATCCAACACCTGGTCAACCTTTGTCCAATCTCGTCTCGTACCCGCTCAATACTTCAGAGATCCG
GAAAACCTAGACTCTTACCTTGAATATTTCCAATTTCTTGGCGACATCAATAATGAGCGCGTTCTCAAGAACCACAAACATATAAATCCAACATGG
AAAAATTGGAACGATTCGTAATGTATGTCTTTGAAGACGACACAACCTGTCATTCCTAAGGAAAGTGGATGGTGGGCTGAAGTCAACGGCAGGGA
AGTTACACCCTGAAAAGAAAGAGCCATTTATAAAGAAAGATTGGCTAGGTTTAAAGACATTTGGATGAGGCGGAAAATTAGTTTTCGAAACCATT
CCAGGGGGACATATGACGTTAGGAGAGGAGATGCTAGAGAAGGCTTTCAAAGAGTATTTTGGTCCAGCAGGGAAAGAAATTTGGGG
```

```
>Bcin16g03460 (MLST7), partial sequence [organism=Botrytis cinerea, strain D13_MR_S1]
TCATGAACCTCTTGATTTGAACTCTTCATTAATTTGCAAGTGTATGAACCCCTATTTCTGCCAGAGGATAGTTACAAGACGTATATCATTTAGTCTGA
GAACCACTCATGATATATATTGACGGATTTTTTGAAGCGAATGAAAGTAAACATTTGGTTGATGTTAGGTGTGTTATTTATTCTGATGAAATGA
ACAAGAGAGACTGATGAGATAGTGAAGCGCTTTATGAACCGTCAACTGTTTCTCACGACAGGAAGTTACCATTGATCCTTCAGTTCCGAATTC
TGAAGTGGCGGTTTTAGAGAGGGATGAGGTGGTCAAGGTGATTTGAGCATAGAGCGAGGGCATTTCAGGGGTGGAGGGGCGAGATGGGGATTGAG
AAGTTGAGGACGCAGAGGTATGGGGTTGGAGGACATTATGGGATGCATTTGTAAGTTTTGGGGGATTTGACGAAGGCTTTTGTCTATTTTCTACC
AGTACGGATCTTGAAAAGAAAAGATAGCATGAACACGAGGGCTAATAACTAGGAAATAGCGATTGGAGCGGAGGTAACCTGGCATAGACCGATTT
AGTACTTTTCATGGTCTATGTCGACGTATCCTCTGATATCGAAGTGGAGGAACGGAATTTCCACGTATCGTGGGACAAAAGGAGGAAGGTGGG
AGGACTTCTGAAAACCTACGGAAGCATTTGGATCCAAGAACCTGGAGAAAATGTAACAGTAGAAGGGGTGACATTCAAACCAATCAAGGGAAATGC
CGTATTCTGGGAAAATACTGACAACAACGGGAGGGGCTATGAT
```

```
>Bcin12g03020 (MLST8), partial sequence [organism=Botrytis cinerea, strain D13_MR_S1]
CGATTGGCTGCGAAGAAAACCTGCGCAGCACCGAGTCAACAAAAGCACGAATAAACCATCGGCAAGGGAATATTTCTCTGAACCACAACATGACA
CGAGCGCGGAAGAGTATATCGGGCGAGAAGCTTCATCAAGAGCACCAAAGCGACAACGAGTCGATGATAATTATAACTCTTACGGTGGAAAGAAA
TGAAAATACAGCAGCTTATGCTTCCGGGAAACTTCCATCTGGAAGTATAAATGTTGGTGGAGGTAGGAAGACCACCTTTTCAAGAAGAACCACGA
ACGGCATTGTGCTGCGTGGCAAGTTGCCCTTGGAAAGTATCAACATTTGGTGGAAAGAAAGGCTACCCAAATCGAGGACGAGGGTAGAGCAGCTTATG
CTTCCGAAAATTTGCTCCAGGAAGTATAAACTCTGGCGCAAAAGAAAGCGATTTCAATCCAAGATGAAACGAGACCGGCTTATGCTCTCCGAAA
GCTTCCACATGGTAGTATCGACGGTATGCGAAAACCGTGAAATGGCTGCCGTCCACCGCGAAATTTGCTGAGGGTGGGAGGAAACCAGGCCAGGTT
GTCTCTTCTCTATTACATTCATCTACTTCAAAGAAAACCTTTGATGAACCCGAAGAACAAGCGGAACCGGCAAAACCATCCAATGCGCCTT
TGACAGAGGAAAATGGCGACTTTACCAATCTAGGGTTATCGAGAAGGCTTGCAGCCCATCTATCGACTAAACTCGATATGAAAGCCCCGACGGC
CATTCAAAGCATCTGTGCAGCAGTTGGTATCGGACGATAGCGATGCTTTTCATACAAGCAGAGACTGGATCTGGAAAACCTTTGGCATATCTAC
TACCTATAGTCGAGCGAATATTAGCATTGAGTGAAGTGGCGTACAAA
```

>Bcin02g07770 (MLST9), partial sequence [organism=Botrytis cinerea, strain D13\_MR\_S1]  
ACAGCTTTCCTTTCGGTCTTGGCATCTACAGTCATTGCCATCCCTACACCATCACAACCTGAGTCTCGGGCCGTTATCGATTCCGATGCCGTT  
GTAGGATTTGCCGAAACTGTTCCAGTGGGACCGTAGGAACAGTTTATGAGGCATATAAACCATTCCTTAAAGTCGTAATGGATGCGTACCAT  
TCCCTGCCGTCGATGCATCGGGTAACACAGGGTATGTCCCTTATACCTTTCTCTTCCACACGATTGCTATTGAGTCTCTAACATATTTTAGTGGT  
GGTTTGTACCAACTGGCAGCAGCAATGGTGAATGCAGCAGCAGTACCGTCAAGTATATGTTTCGAGGAGGACAAAGCGGATCAAACCTACGCTA  
TCATGTACTCCTGGTAAGTCTCTTTAAACTTCTCCTTATAGATCCAACCTAACAAAACTTAGGTACATGCCAAAGGACGAGCCCTCAACCGG  
TATTGGTCACCGTCACGATTGGGAAGGTGTAATTGTCTGGCTCTCCAGCGCCACCGCCACAACCTGCCGACAACATCTTAGCCGTTTGTCTTCC  
GCCCACGGAGGCTGGGATTGTTCCACGGATGGCTATTCCTTTCTGGTACCAGCCCTCTTATCAAGTACGAAAGTATCTGGCCCGTCGATCACT  
CAATGGGTCTTACTAGTACTGTTGGTGGAAAAACAACCTATGATTGCTTGGGAGTCTTTACCAACTGCTGCTCAAACCTGCTCTTGAGAACACCGA  
TTTCGGTGCTGCGAATGTTCATTCATTCGGGCTGTTTTACAGATAATCTT

>Bcin04g02090 (MLST10), partial sequence [organism=Botrytis cinerea, strain D13\_MR\_S1]  
CGGAGGATGATATGGCAAAGTCTATGATTACCAAAGCATTTGTAGGCATGAGTAGTAAATTGTCGAATATGACTATGAATGATGTTTACAAGCC  
CTACATCCATGTAAGAAAATGTAGAATAAAGAGATCAGTAACTGGAACATAATATCGTTTGCAGGCTTTCAAGTTACTTACGCAGTTCAACCCAAT  
CACTACAGCTATTGCCGAATCCCCACTATTTCAAATGGCTGTCTCAGCAAATACCATCGAAAAGTACACACTGCTAGGCCCTTTCTTCAGAGTA  
TCTCCTCTGCAACAGGAAGTTACCAGGAATACTTCAAGTGCGCCAAAGACGATAGATAGGCGACACATTTGCCACATCTCAAGATGCGTTACGAT  
TGACCTTACAAACCCATCAAAAAGATTTACTTGTATATCAACCACTTTGTTTCGAGCAAGTCCAATCGCAAAAAGCAAACCCCTGGATTGGTT  
CGCTTACATTGTGAATCAAAAATCACAAGCGTCGAGCACTTCAGGTAGACCCGAAAAGAGTGTCTTCTGATGGCTTTATGCACAATGTCACCTGTC  
GTTCTAGATGGTCTTTGTGAGCCATTCATGGATACCACATTTCTCAAAAATTTGGAAGATTGATATTGATTATCTAAGACGTGCGCCCCGTGTAG  
ATATCAAGGACGAGACCAAGTTGAACGCTGATGAGAAGGCTTCTGAGAAGTATTATGAGGACACTGTTCTGGCACTTCTAATTTTATCTCTGA  
GGTATTCTTTCTGACATTGGCTGCTCATATTATGGTAGTGAAGCTCTTAATGCCACGCATAAGAGTCTGGAGAAAGACATCAAATATATTTCAA  
AAGCAATTGACTGCCGTTGAAGCA

>Bcin01g07220 (MLST1), partial sequence [organism=Botrytis cinerea, strain D13\_MR\_S29]  
ATGGCATATCTTGTCTTTTCGCATTATGCTTTGGAACGTGCTGGACAAGCTTGGGTTAGTGTCTCGCTGTAGAAGCACTAAAGAAGATTCT  
CGCACAACCGAAGTCATGGTTTTGAGGAATCCAGGAATTCACCTGGCCGGTTGAACGAAAGTTTTGGATAGGAACTCTGAGGAAATGCGTAATCTC  
GTTGGCCGCTTTGCTGGTATTGTATTACACGATTTTTTATGCTATTGATATCAATCATTGGGCTTTTGTGAATACATGGAAACTGACATTAG  
TCTCGATGGCAACTGGCCAGTTATATACGCTGTCACCAAAACATTCATCGCGTGAGTGGAAAATGGGAAAACAAGTGAACCTACGCCCTCTGA  
AATGACCACTGGCATATTTTCAGAGACTTTCTCCAACATCAAAGTGGTTTCGGGCTTTTACTCTGGAACTTACTTTGAGACAAAACACACCAA  
GCTACAGAAGAACTTTATAAAGTTGGACTAATACGAGCAAACCTACTCGGGATTGCTGTGGGGATTGACAGATGCGATGTCATTTCTCATCACTG  
CAACTATCTTTTATTATGCCACGGTCTCATTACCAAGAGAGAGATCAGTATCGCGACTGCACTACAGACTGTCAATCTTCTATTATTTGGTAT  
TTCTAATAGTACGAATATGCTGGCCATGATACCACAAAATCAACTCTTCTCGCGTTACAGCTACGCATATGCTTGCATTAGCCAATCTCGATTCA  
TCTTCTCCACGAAAATAAAGGAACCGAACGGCTTTTCGACAATCTTTCCAATCAAATTCACCCGCTTTTCATTACATACCCTACTCGTCTG  
AAAAACGAACGATATCATCTTTTCTCTTTCCCTGATTCCCTAACTCAACAACCTGCACTTGTTCGGACCTCCGGCTCCGAAAATCTACAATAGT  
TGCTCTGCTCATTGGTCTCTATCCGCCAGATACTTCAACACCTCCACCGTTGACATTCAATCGCGTCTCCATAAGTAACTGTACATTTCCGCTC  
CTCCGGGCTTCTCTCTCACTCGTTCCACAAAATACCGATTCTATTTCCAGCTACCATTCTCCATAACATCATTTATGGTCTCCGAAATCTTCTC  
CTTGTGCTAGTCTTCCATCAGCTATTGCATCAGCAAAGATGCTGGGATCCATGAATTTATCACATCGCTTCCACAAGGTTATGATACTAT

>Bcin05g07690 (MLST2), partial sequence [organism=Botrytis cinerea, strain D13\_MR\_S29]  
ACCCTATCACCAAGTCTTTTCTGCACTTTCCCTCATCAAAAACGAACGAGAATCATCAATAAACTTTGCTGAAGTAAATGGGTTTTATT  
TTGGCCAGGATGCCTTCTCTCTACGACAGCAAGCCTTCGATGATATGTTGTGGGTAGTCTTGGCTGGCTGGATACTGTCAAATTCATTGATTT  
ACATTCTGAATTGCACTATTCAAACGACTCTCAGCCAGAAATGGTACGACAACAATATAAACCTGCATTTGCACATCGAGCGGACTATTTTGG  
GAATTGGCTTCAAAAGGATGGGATACTACTCTCTGTGGTGGTGGATGATATGGTACCATACTTACTCCATAACAAGAACGAATTTACCAATG  
AACTCTATATCGCAGCTTCGATATCGATGTACCTATATTTCCCCGGAGATGACAATCAATCCCCATTTATGATTTCCAACCCCTTCATATCCACC  
TCACGATCCGAAATATCTACAGGCAGCTGTTGATGCTTACAAAATGGCTGAATGGTTCCAACATGACGGATTCAAAAGGATTATATGTCGACGGG  
TACCATATCTCGAATCTTTCTGGCCGTGAAAACACCCATTTGCGATTCTAGAAATGAGATGGTATATACCTACAATCAAGGTGTTTTGCTTACTG  
GACAACGTGGTTTTGTATGACGCAACCGCCGACGATCATACCTTGTAGATGGCCACAACTCATCGCGAATGTTATTAATGCCACAGGCTATGA  
CCTGAAACACAATGTTGTCATCTCACCGCCACCCAAAGATGGTTCCGCATTTGGCAAAGTGGTTTGGCCTGGGTAGGAATGGAATACCTGGAAGAA  
GGATGCGATTCAAGTCTTCGTGTTCTCAAAAATGGACAACTTTCAAAGGCATATCTTTTATCATTGATTGCGTCTGTAGTATTGTTGCCAG  
GGGAGCCTATTGCAGGGACGAAGGAAAGCTTAGAACTCGACAGAGTGTGGCATTCTGACAAAATGCTCACAGTATACAAAAT

>Bcin06g01710 (MLST3), partial sequence [organism=Botrytis cinerea, strain D13\_MR\_S29]  
GTGAGTCTGACTTTTGTATTTGAGCGTTAAGATAGACACTGATATACCAAGGCAATCACCTAATTTTCATGGCGTTCTTCCCTGCATCATCTACC  
TACCCTGGAATGCTGGGAGAATTATACTCAGCAGCTTTACAGCACCTGCTTTCAATTTGGATCTGTTCCCTGCTGTGACAGAATTTGGAGACGG  
TTGTAATGGATTGGCTGGCCAAGCTTCTCAATCTCCAGACTGTTATTTGCTTTCGACTCATGGTGGTGGTGTCTCCAAGGATCAGCCTCGGA  
AGCTATCGTTACCGTTATGGTTGCTGCCCGGATAAATATCTTCGTGAACTACTGAAGTCTGTTCGGGCATTGAACTCGAGGATGCGATTGCA  
TATAAGAGGAGTAAGCTAGTTGCACTAGGAAGCGAAATGGCACACAGCTCCACGCAGAAAGCAGCGCAAATAGCTGGCGTTAGATTCCGATCGA

```
TTCCAGTACTCGCATCCAATGATTTTCGCCATGACGGGTGATGATTTAGAGAAGGTATTGAAAGAATGCAAATCTCAAGGATTGGAACCCCTTCTA
TCTAACTTCGACTTTGGGAACAACATCTACATGCGCAGTTGACGACTTCGCATCTATTGCAACAGTACTTTCAAAAATATGCACCTCCAGATGTT
GCAGGCGAGATCTGGGTTACGTCGATGCTGCTTATGCAGGTGCAGCTTTGGTTTGCCCTGAATACCATCATCTAACATCGTCTTTCCAGCATT
TCCATTCCCTTCGATATGAACATGCACAAAATGGCTTCTGACAAAATTTTCGACGCTTCTTGCTATATGTCAAGAAAACGCAAAGATCTGATCGATGC
ACTGTCCATAACACCAAGTTATCTTCGCAACGAGTTTTTCAGAGAGTGGACTCGTAACCGACTATCGGGACTGGCAAATTCCTCTCGGAAGACGC
TTCCGAAGCTTAAAGATTTGGTTTGTCTCAGAACCTAC
```

```
>Bcin09g03030 (MLST4), partial sequence [organism=Botrytis cinerea, strain D13_MR_S29]
ACCCCTCAACCCACCGCAGCTCCTATACCGAAAGCGAGTATCCTACCAATTCTCCTTCCACCTGCGACTTTAAGACCATTGGCTTTCCGCACT
TTCACAAAAAAGCATAGTTTAAACATTGACATCGTCGGCATTACAAGTGTGGCTACTTTTATTGGAAAGCATTGTGGGACAGGATGGAGGGAAG
AAGGACTGGCAGAGAGAGTCTTGGAGGAGGTGCGCAAGAGTTGGAAGAAATAGGAGTGGCGGTGTCAATTGTGCGAGGGCGAGGGAACGGAATTGAA
GGAGATTCTGAAAGCTTTGGAAGGGAATATGAGTGGTGAAGGATAGTTCATAGGAAGAGAGCTAAGCCGGCAGAATAGTTTAGTACTGGGATCA
TCACAATATGGAGAGGTCAATCATAACAAGACTTGGGCTACGGCCAGGGAATATACCAGAGAGGATAGTCAAGTTTGGGAATGTCAACGT
TGGGGTCAATGACGAGGAAGATGAGGATGGCTGATGGATCCAAGAAGGTGGTTAAAAGTCAATTGATGCATTTGAGCAACCTCGACTGGTGTAC
AATGTTGCTAAAAAGCACTTTGATAGGTATGTTTCAATGATAAAAATTTTCATCTGAATCGGCTAACTCAGTACAGAGATACCTCCAAACCTTCAT
TGTTCCACCTGCGTCTCATAAAACACTCCTCTTCCAAAACCGCTATAATGTTATCCATCAACGTCTCCTTCGCAATGAATCTTTTCAAACGCC
CGCTTTTCAAGGTGGCAAATCTTCCCTTCAACGCAGCACGTCCGCCATTACCACCCAACAACAATCATACAAATTAACGCCGATAGCTAATCTT
CTCGGTGCGCAATCGCAGCTCTCATATGCTTCTCGGTCTCCTCAGTATTTTACCCTACTGGTACCTCGCCATCAATGACCTGACGGGCAGTATCG
CTCTCGATCTTACACACGCAGCAGCCATTC
```

```
>Bcin11g01310 (MLST5), partial sequence [organism=Botrytis cinerea, strain D13_MR_S29]
GGCTGACATGGACCTCATGTGGAACCGGCGTAGAATGCGCAACGCTTGAAGTTCCGCTCGAATATGGCGATGCAACGTCAACGGCAAAAGCCAG
TGTTGCGCTTGCTCGTTATCCTGCCACTGTTGCCGCGAGCAAGAAGCTCGGGTCTCTCTTGATAAAACCCGGTGGACCCGGTGCCTCTGGTGT
GGCTTTGTGACGCTGGAGCCGGTGGCCCGTCTCGACACTGAGTGGTGGATTGTACGATATCATCGGATGGGATCCACGTGGAACCCGGTGCCT
CGGCTCCTATTTTGAAGTGTGTTGCAAAATGCCAGTGCAGGATGATGATTTTAAACAACCGGTTTCCATCTGCTCCGAATCTCTGGCTCGGACAAT
TGCGAATGCCAGCGCAAAATCTGCTGTTAGCTCTGCTATCACATCCTTTGACACTTCTGTGCTGCTCTTGCAAAAAGCTTGGCTGGCTCAGAAA
TCTCCCCTCTTTTACACCTCAACAGCAGCATATGTTGCTCGAGACATGGCAGCGATAGTGCATGCATTGGATGGGACCTCTGCAAAAACCTTAACT
ACTGGGGTTTCTCATATGGAACATCTTCTTAGCTGAGTTTATCCAACTTTCCAGGCCGCTGGGAAGAGTTCTTGCCGATGGTGTGTTTTCGA
CGCAAAGGCAAAATGCACTCACATACGTTAGCCAACTTCCCAACGATCAACTCAGTGTTCGTGCTTCGTTGAACGATTTTGCAGCTTCTGCAAC
ACCGCCGGTAGTAAAGGTTGCTCTTTTGCCACCGCCCTACTGGAACCTCAGGTACTGTTGCTACCAGACTGGACAACATAATGAAGGATATGT
TCCCTCAATCCTATTGTTGCTTCGGGCTTAAGCATCAG
```

```
>Bcin15g03910 (MLST6), partial sequence [organism=Botrytis cinerea, strain D13_MR_S29]
CGCCAAAACACAAAATCATCCAACGATGAAGATGATACTCCACTTCCCTTGATTATCTGGCATGGACTCGGCGATAATTACAAAGCGGATGGTC
TTGCGCAAGTTGAAAACCTAGCTGAAGCTATTCATCCTGGGACTTTTGTCTACAATATTCATGTAGATGAGGATGCATCTGCAGATAGGACAGC
TACCTTCTTTGGAAATCTCACTCGTGAGTACATCCCCTATTTTCTTTTAAATATCATACTAACTCTCTTACCAAGTTCAAATCGAAAAGGTCT
GCGAAGACCTCGCCTCCCATCCTATTCTCTCTACCAGCGCCCGCGTGCAGCCAATTGGATTCTCCCAAGGCGGCCAATTTCTTGGCTGGTTACAT
ATCCCGCTGCAATACTCCACCCATCCGCTCTCTCCTGACCTTCGGTTCCCAACACAACGGCATTCTGCTTCCAAGCCTGTGGTCCGCGAT
TTCTCTGTGCGGGTGCCTCAAACCTTTTGGGATCCAACACCTGGTCAACCTTTGTCCAATCTCGTCTCGTACCAGCTCAATACCTCAGAGATC
CGGAAAACCTAGACTCTTACCTTGAATATTTCCAATTTCTTGGCCGACATCAATAATGAGCGCGTTCTCAAGAACCAAACATATAAATCCAACAT
GGAAAATTTGGAACGATTCGTAATGTATGTCTTTGAAGACGACACAACCTGTCATTCCTAAGGAAAGTGGATGGTGGGCTGAAGTCAACGGCAGC
GAAGTTACACCACTGAAAGAAAGAGCCATTTATAAAGAAGATTGGCTAGGTTTAAAGACATTTGGATGAGGCCGAAAATTAGTTTTCGAAACCA
TTCCAGGGGGACATATGACGTTAGGAGAGGAGATGCTAGAGAAGGCTTTCAAAGAGTATTTTGGTCCAGCAGGGAAGAAATTTGGG
```

```
>Bcin16g03460 (MLST7), partial sequence [organism=Botrytis cinerea, strain D13_MR_S29]
CATGAACCTCTTAATTTGAACTCTTCAATTTTGCAAGTGATGAACCCCTATTCTGCCAGAGGATAGTTACAAGACGTATATCATTAGTTCGAG
AACCCTCATGATATATATTGACGGATTTTTGAAAAGCGAATGAAAGTAAACATTTGGTTGATGTTAGGTGTGTTATTTATTTCTGATGAAATGAA
CAAGAGAGACTGATGAGATAGTGAACCGCTTTATGAACCGTCTACTGTTTCTCACGGGCAGGAAGTTACCATTGATACTTCAAGTTTCGAAATTTCT
GAAGTGGCGGTTTTAGAGAGGGATGAGGTGGTCAAGTGTATTGAGCATAGAGCGAGGGCATTTCAGGGTGGAGGGGCGAGATGGGGATTGAGA
AGTTGAGGACGCAGAGGTATGGGGTTGGAGGACATTTATGGGATGCATTTGTAAGTTTTGGGGGATTGACGAAGGCTTTTTGTCTATTTTCTACCA
GTACGGATCTTGAAGAAAAGATAGCATGAACACGAGGGCTAATAACTAGGAAAATAGCGATTGGAGCGGAGGTAAACGTGGCATAGACCGATTTA
GTACTTTCATGGTCTATGTGACGATATCCTCTGATATCGAAGGTGGAGGAACGGAATTTCCACGTATCGTGGGACCAAAGGAGGAAGGTGGGA
GGACTTCTGAAAACCTACGGAAGCATTGGATCCAAGAACTGGAGAAAAATGTAACAGTAGAAGGGGTGACATTTCAAACCAATCAAGGGAATGCC
GTATTCTGGGAAAATACTGACAACAACGGGAGGGGCTATGAT
```

```
>Bcin12g03020 (MLST8), partial sequence [organism=Botrytis cinerea, strain D13_MR_S29]
CGATTGGCTGCGAAGAAAACCTGCGCAGCACCAGTACCAAAAAGCACGAATAAACCATCGGCAAGGGAATATTCTCTGAACCACAACATGACA
```

```
CGAGCGCGGAAGAGTATATCGGGCGAGAAGCTTCATCAAGAGCACCAAAGCGACAACGAGTCGATGATAATTATAACTCTTACGGTGGAAAGAAA
TGAAAATACAGCAGCTTATGCTTCCGGGAAACTTCCATCTGGAAGTATAAATGTTGGTGGAGTAGGAAGACCACCTTTTCAAGAAGAACCACGAA
CGGCATTTGTGCTGGCAAGTTGCCCTTGGAAAGTATCAACATTTGGTGGAAAAGAAGGCTACCCAAATCGAGGACGAGGGTAGAGCAGCTTATGC
TTCCGGAAAAATTGCCTCCAGGAAGTATAAACTCTGGCGCAAAGAAGGCGATTTTCATTCCAAGATGAAACGAGACCGGCTTATGTCTCCGGAAAG
CTTCCACATGGTAGTATCGACGGTATGCGAAAACCGTGAATGGCTGCCGTCCACCGCGAAAATGCTGAGGGTGGGAGGAAACCAGGCCAGGTTG
TCTCTTCTCTATTACATTCATCTACTTCAAAGAAAACCTTTTGTATGAACCGAAGAACAAGCGAAACCGGCAAAACCATCCAATGCGCCTTT
GACAGAGGAAATGGCGACTTTCACCAATCTAGGGTTATCGAGAAGGCTTGCAGCCCATCTATCGACTAAACTCGATATGAAAGCCCCGACGGCC
ATTCAAAAAGCATCTGTGCAGCAGTTGGTATCGGACGATAGCGATGCTTTCATACAAGCAGAGACTGGATCTGGAAAAACCTTTGGCATATCTAC
TACCTATAGTCGAGCGAATATTAGCATTGAGTGAGAATGGCGTACAAA
```

```
>Bcin02g07770 (MLST9), partial sequence [organism=Botrytis cinerea, strain D13_MR_S29]
CAGCTTTCCCTTTTCGGTCTTGGCATCTACAGTCATTGCCATCCCTACACCATCACAACCTTGAGTCTCGGGCCGTTATCGATTCCGATGCCGTTG
TAGGATTTGCCGAAACTGTTCCAGTGGGACCGTAGGAACAGTTTATGAGGCATATAAACCATTCCTTAAAGTCGTAAATGGATGCGTACCATT
CCCTGCCGTGCGATGCATCGGGTAACACAGGGTATGTCTTATATCTTTCTCTTCCACACGATTGCTATTGAGTCTCTAACATATTTTAGTGGTG
GTTTGTCAACCAACTGGCAGTAGCAATGGTGGTTGCGAGCAGCAGTACCGGTCAAGTATATGTTTCGAGGAGGACAAAGCGGATCAAACCTACGCCAT
CATGTACTCCTGGTAAGTTCTCTCTAAACTTCTCCTTATAGATCCAACCTAACAAAATCTTAGGTACATGCCAAAGGACGAGCCCTCAACCGGT
ATTGGTCACCGTCACGATTGGGAAGGTGTAATTTGCTGGCTCTCCAGCGCCACCGCCACAACCTGCCGACAACATCTTAGCCGTTTGTCTTCCG
CCCACGGAGGCTGGGATTGTTCCACGGATGGCTATTCCTTTCTGGTACCAGCCCTCTTATCAAGTACGAAAGTATCTGGCCCGTCGATCACTC
AATGGGTCTTACTAGTACTGTTGGTGGAAAACAACCTATGATTGCTTGGGAGTCTTTACCAACTGCTGCTCAAACCTGCTCTTGAGAACACCGAT
TTCGGTGTGCGAATGTTCCATTTCATTCGGCTGTTTTTCACAGACAATCT
```

```
>Bcin04g02090 (MLST10), partial sequence [organism=Botrytis cinerea, strain D13_MR_S29]
CGGAGGATGATATGGCAAAGTCTATGATTACCAAAGCATTTGTAGGCATGAGTAGTAAATTTGTCGAATATGACTATGAATGATGTTTACAAGCC
CTACATCCATGTAAGAAATGTAGAATAAAGAGATCAGTAACTGGAACATAATATCGTTTGCAGGCTTTCAAGTTACTTACGCAGTTCAACCCAAT
CACTACAGCTATTGCCGAATCCCCTACTATTTCAAATGGCTGTCTCAGCAAATACCATCGAAAAGTACACACTGCTAGGCCCTTTCTTTCAGAATA
TCTCCTCTGCAACAGGAAGTTACCAGGGAATACTTCAGTGCGCCAAAGACGATAGATAGGCGACACATTTGCCACATCTCAAGATGCGTTACGAT
TGACCTTACAAAACCCATCAAAAAGATTTACTTGTATATCATCAACCCTTTGTTTCGAGCAAGTCCAATCGCAAAAAGCAAAACCCCTGGATTGGTT
CGCTACATTTGTGAATCAAAAATCACAAGCGTCGAGCACTTCAGGTAGACCCGAAAGAAGTGTCTTCTGATGGCTTTATGCACAATGTCACCTGTC
GTTCTAGATGGTCTTTGTGAGCCATTTCATGGATACCACATTTCTCAAAAATTTTCGAAGATTGATATTTGATTATCTAAGACGTGCGCCTCGTGTAG
ATATCAAGGACGAGACCAAGTTGAACGCTGATGAGAAGGCTTCTGAGAAGTATTTATGAGGACACTGTTCCCTGGCACCTTCAATTTTCATCTCTGA
GGTATTCTTTCTGACATTGGCTGCTCATCATTTATGGTAGTGAAGCTCTTAATGCCACGCATAAGAGTCTGGAGAAAGACATCAAATATATTCAA
AAGCAATTGACTGCCGTTGAAGCA
```

```
>Bcin01g07220 (MLST1), partial sequence [organism=Botrytis cinerea, strain D13_MR_S4]
ATGGCATATCTTGTCTTTTTCGATTATGCTTTGGAACGTGCTGGACAAGCTTGGGTTAGTGTCTGCGTGTAGAAGCACTAAAGAAGATTCT
CGCACAAACCGAAGTCATGGTTTTGAGGAATCCAGGAATTCACCTGGCCGGTTGAACGAAAGTTTTGGATAGGAACCTCGAGGAAATGCGTAATCTC
GTTGGCCGCTTTGCTGGTATTGTATTTCACAGCATTTTTTTATGCTATTGATATCAATCATTTGGGCTTTTTGTGAATACATGGAAACTGACATTAG
TCTCGATGGCAACTGGGCCAGTTATATACGCTGTCACAAAACATTCGATCGCGTGAGTGGAAAATGGGAAAACAAGTGCAACTACGCCCTCTGA
AATGACCACTGGCATATTTTCAGAGACTTCTCCAACATCAAAGTGGTTTCGGGCTTTTACTCTGGAACTTACTTTGAGACAAAACACACCAAA
GCTACAGAAGAACTTTATAAAGTTGGACTAATACGAGCAAACTACTCGGGATTGCTGTGGGGATTGACAGATGCGATGTCATTTCTATCACTG
CAACTATCTTTTTATTATGCCACGGTTCTCATTACCAAGAGAGAGATCAGTATCGCGACTGCCTACAGACTGTCAATCTTCTATTTATTTGGTAT
TTCTAATAGTACGAATATGCTGGCCATGATACCACAAAATCAACTCTTCTCGGTTACAGTACGCATATGCTTGCATTAGCCAATCTCGATTCA
TCTTCTCCACGAAAATAAAGGAACCGAACGGCTTTTCGACAATCTTTCCAATCAAATTCACCGTCTTTTCATTACATAACCTACTCGTCTCTG
AAAAACGAACGATATCATCTTTTCTCTTTCCCTGATTCTTAACCAACTGCACCTTGTGCGACCCCTCCGGCTCCGGAAAATCTACAATAGT
TGCTCTGCTCATTGGTCTCTATCCGCCAGATACTTCAACACCTCCACCGCTGACATTCAAATCGCGTCTCCATAAGTAACTGTCACATTCCGCTC
TCCGGGCTTCTCTCTCACTGTTCCACAAAATACCGATTCTATTTCCAGCTACCATTCTCCATAACATCATTTATGGTCTCCAGAACTCTTCTC
CTTGTGCTAGTCTTCCATCAGCTATTGCATCAGCAAAAAGATGCTGGGATCCATGAATTTATCACATCGCTTCCACAAGGTTATGATACTAT
```

```
>Bcin05g07690 (MLST2), partial sequence [organism=Botrytis cinerea, strain D13_MR_S4]
ACCACTATACCAAGTCTTTTCTGCACTTTCTCATCAAAAACGAACGAGAACATCATCAATAAAATACTTGTGAAGTAATTTGGGTTTTATTT
TGGCCAGGATGGCTTCTCTCTACGACAGCAAGCCTTCGATGATATGTTGTGGGTAGTTCTTGGCTGGCTGGATACTGTCAAATTCATTGATTTA
CATTCTGAATTGCACTATTCAAACGACTCTCAGCCAGAATGGTACGGACAACAATATAAACCTGCATTTGCACATCGAGCGGACTATTTTGGG
AATTGGCTTACAAGGATGGGATACTACTCTCTGTGGTGGTGGGATGATATGGTCACCATACCTTACTCCATAACAAGAACGCAATTACCAATGA
ACTCTATATCGCAGCTTCGATATCGATGTACCTATATTTCCCGGAGATGACAAATCAATCCCATTTATGATTTCCAACCTTCATATCCACCT
CACGATCCGAAAATATCTACAGGCAGCTGTTGATGCTTACAAAATGGCTGAATGGTTCCAACATGACGGATTTCACAGGATTATATGTCGACGGGTA
CCATATCTCGAATCTTTCTGCGGTGAAAACACCCATTGCGATTCTAGAAAATGAGATGGTATATACCTACAATCAAGGTGTTTTGCTTACTGGA
CAACGTGGTTTGTATGACGCAACCGCCGACGATCATACCTTGTAGATGGCCACAAAATCATCGGAATGTTATTAATGCCACGGGCTATGACC
```

TGAAACACAATGTTGTCATCTCACCGCCACCCAAAGATGGTTCCGCATTGGCAAAGTGGTTTGGCCTGGGTAGGAATGGAATACCTGGAAGAAGG  
ATGCGATTCAAGTGCTTCGTGTTCTCAAAATGGACAAACTTCAAAGGCATATTTCTTTCATCACTTGATTGCGTTCTGTAGTGATTTGCCAGGG  
GAGCCTATTGACAGGACGAGGAAAAGCTTAGAACTCGACAGAGTGTGGCATTCTGACAAATGCTCACAGTATACAAAAT

>Bcin06g01710 (MLST3), partial sequence [organism=Botrytis cinerea, strain D13\_MR\_S4]

GTGAGTCTGACTTTTGTGTTTGGAGCGTTAAGATAGACACTGATGTACCAAGGCAATCACCTAATTTTCATGGCGTTCCTCCCTGCATCATCTACC  
TACCCTGGAATGCTGGGAGAATTATACTCAGCAGCTTTACAGCACCTGCTTTCAATTGGATCTGTTCCCTGCGGTGACAGAATTGGAGACGG  
TTGTAATGGATTGGCTGGCCAAGCTTCTCAATCTCCAGACTGTTATTTGTCTTCGACTCATGGTGGTGGTGTATCCAAGGATCAGCCTCGGA  
AGCTATCGTTACCGTTATGGTTGCTGCCCGGATAAATATCTTCGTGAACTACTGAAGTCTGTGCGGCATTGAACTCGAGGATGCGATTGCA  
TATAAGAGGAGTAAGCTAGTTGCACTAGGAAGCGAAATGGCACACAGCTCCACGCAGAAAAGCAGCGCAGATAGCTGGCGTTAGATTCCGATCGA  
TTCCAGTACTCGCATCCAATGATTTTCGCCATGACGGGTGATGATTTAGAGAAGGTATTGGAAGAAATGCAAATCTCAAGGATTGGAACCTTCTA  
TCTAACTTCGACTTTGGGAACAACATCTACATGCGCAGTTGACGACTTCGCATCTATTGCAACAGTACTTTCAAATATGCACCTCCAGATGTT  
GCAGGCGAGATCTGGGTTACGTCGATGCTGCTTATGCAGGTGCAGCTTTGGTTTGGCCTGAATACCATCATCTAACATCGTCTTCCAGCATT  
TCCATTCTTCGATATGAACATGCACAAATGGCTTCTGACAAATTTGACGCTTCTTGTCTATATGTCAAGAAAACGCAAAGATCTGATAGATGC  
ACTCTCCATAACACCAAGTTATCTTCGCAACGAGTTTTTCAGAGAGTGGACTCGTAACCGACTATCGGGATTGGCAAATTCCTCTCGGAAGACGC  
TTCCGAAGCTTAAAGATTTGGTTTGTCTCAGAACCCTAC

>Bcin09g03030 (MLST4), partial sequence [organism=Botrytis cinerea, strain D13\_MR\_S4]

ACCCTTCAACCCACCGCAGCTCCTATACCGAAAGCGAGTATCCTACCAATTTCTCCTTCCACCTGCGACTTTAAGACCATTGGCTTTCCGCACT  
TTCACAAAAAAGCATAGTTTAAACATTGACGTCGTCGGCATTACAAGTGTGGCTACTTTTATTGGAAAGCATTGTGGGACAGGATGGAGGGAAG  
AAGGACTGGCAGAGAGAGTCTTGGAGGAGGTCGCAAGAGTTGGAAGAATAGGAGTGGCGGTGTCAATTGTGCGAGGGCGAGGGAACGGAATTGAA  
GGAGATTCTGAAAAGCTTTGGAAGGGAATATGAGTGGTGGAAAGGATAGTCATAGGAAGAGAGCTAAGCCGGCAGAATAGTTTAGTACTGGGATCA  
TCACAATATGGAGAGGTCATACATAAAGACTTTGGGCTACGGCCAGGGAATATACCCAGAGAGGATAGTCAGTCAAGTTTGGGAATGTCAACGT  
TGGAGGTCAATGACGAGGAAGATGAGGATGGCCTGATGGATCCAAGAAGTGGTTAAAAGTCATTGATGCATTTGAGCAACCTCGACTGGTGTGTA  
CAATGTTGCTAAAAAGCACTTTGATAGGTATGTTTCAATGATAAAAATTTTCATCTGAATCGACTAACCTCAGTACAGAGATACTCCAAACCTTCA  
TTGTTCCACCTGCGTCTCATAAAACACTCCTCTTCCAAAACCGCTATAATGTTATCCATCAACGTCTCCTTCGCAATGAATCTTTTCAAACGC  
CCGCTTTTCAAGGTGGCAAATCTTCCCTTCAACGCAGCAGCTCCGCCATTACCACCAACAACAATCATACAAATTAACGCCGATAGCTAATCT  
TCTCGGTGCAATCGCAGCTCTCATATGCTTCTCGGTCTCCTCAGTATTTACCCTACTGGTACCCTCGCCATCAATGACCTGACGGGCAGTATC  
GCTCTCGATCTTACACACGCAGCAGCCATTC

>Bcin11g01310 (MLST5), partial sequence [organism=Botrytis cinerea, strain D13\_MR\_S4]

ACTGACATGGACCTCATGTGGAACCGGCTAGAAATGCGCAACGCTTGAAGTTCCGCTCGAATATGGCGATGCAACGTCAACGGCAAAGCCAGT  
GTTGCGCTTGCTCGTTATCCTGCCACTGTTGCCGCGAGCAAGAAGCTCGGGTCTCTCTTGATAAAATCCCGGTGGACCCGGTGCCTCTGGTGTG  
GCTTTGTGCACTCTGGAGCCGGTGCCCGCTCTCGACACTGAGTGGTGGATTGTACGATATCATCGGATGGGATCCACGTGGAACCGGTGCTTC  
GGCTCCTATTTTGGAAATGTTTGGCAAATGCCAGTGGGAGTATGATTTTAAACAACGCTTTCCATCTGCTCCGAATCTCTGGCTCGGACAATTT  
GCGAATGCCAGCGCAAATTTGCTGTTAGCTCTGCTATCACATCCTTTGACACTTCTGTGCTGCTCTTGCAAAAGCTTGGCTGGCTCAGAAAT  
CTCCCGCTCTTTACACCTCAACAGCAGCATATGTTGCTCGAGACATGGCAGCGATAGTCGATGCATTGGATGGGACCTCTGCAAACTTAACTA  
CTGGGGTTTCTCATATGGAACATCTTCCCTAGCTGAGTTTATCCAACTTTCCAGGCCGCTGGGAAGAGTTCTTGCCGATGGTGTTCGAC  
GCAAAGGCAAATGCACTCACATACGTTAGCCAATTTCCCAACGATCAACTCAGTGTTCGTGCTTCGTTGAACGATTTTGCAGCTTTCTGCACCA  
CCGCCGGTAGTAAAGGTTGCTCTTTTGGCACCGCCCTACTGGAAACCACAGGTAAGTGTGCTACCAGACTGGACAACATAATGAAGGATATGTT  
CCTCAATCCTATTGTTGCTTCGGGCTTAAAGCATCA

>Bcin15g03910 (MLST6), partial sequence [organism=Botrytis cinerea, strain D13\_MR\_S4]

GCCAAAACACAAAATCATCCAACGATGAAGATGATACTCCACTTCCCTTGATTATCTGGCATGGACTCGGCGATAATTACAAAGCGGATGGTCT  
TGCGCAAGTTGGAAGAACTAGCTGAAGCTATTCATCCTGGGACTTTTGTCTACAATATTCATGTAGATGAGGATGCATCTGCAGATAGGACAGCT  
ACCTTCTTTGGAAATCTCACTCGTGAGTACATCCCTATTTTTCTTTAAATATCATACTAACTCTCTTACCAAGTTCAAATCGAAAAGGCTG  
CGAAGACCTCGCCTCCCATCCTATTTCTCTTACCAGCCCGCCGCTCGACGCAATTTGGATTCTCCCAAGGCGGCCAATTTCTGCGTGGTTACATA  
TCCCCTGCAATGCTCCACCCATCCGCTCTCTCTGACCTTCGGTTCCCAACACAACGGCATTTCTGCCTTCCAAGCCTGTGGTCTGCCGATT  
TCCTCTGTGCGGGTCTCAAACCTTTTGGCATCCAACACCTGGTCAACCTTTTGTCCAATCTCGTCTCGTACCCTCAATACTTCCAGAGATCC  
GGAAAACCTAGACTCTTACCTTGAATATTTCAATTTCTTGGCGACATCAATAATGAGCGGTTCTCAAGAACCACAAACATAATAAATCCAACATG  
GAAAAATTTGGAACGATTTCGTAATGTATGCTTTTGAAGACGATACAACCTGTCAATCCCTAAGGAAAGTGGATGGTGGGCTGAAGTCAACGGCACGG  
AAGTTACACCACTGAAAGAAAGAGCCATTTATAAAGAAAGATTGGCTAGGTTTAAAGACATTTGGATGAGGCCGAAAATTAGTTTTCGAAACCAT  
TCCAGGGGGACATATGACGTTAGGAGAGGAGATGCTAGAGAAGGCTTTCAAAGAGTATTTTGGTCCAGCAGGGAAGAAATTTGGG

>Bcin16g03460 (MLST7), partial sequence [organism=Botrytis cinerea, strain D13\_MR\_S4]

ATGAACTCTTGATTTGAACTCTTCATTAATTGCAAGTGATGAACCTATTTCTGCCAGAGGATAGTTACAAGACGTATATCATTTAGTCGAGAAC  
CACTCATGATATATATTGACGGATTTTGAAGCGAATGAAAGTAAACATTTGGTTGATGTTAGGTGTGTTATTTATTTCTGATGAAATGAACAA

```
GAGAGACTGATGAGATAGTGAGCCGCTTTATGAACCGTCAACTGTTTCTCACGGACAGGAAGTTACCATTGATCCTTCAGTTCGGAATTCCTGAA
GTGGCGGTTTTAGAGAGGGATGAGGTGGTCAGGTGTATTGAGCATAGAGCGAGGGCATTTCAGGGGTGGAGGGGCGAGATGGGATTGAGAAGTT
GAGGACGCAGAGGTATGGGTTGGAGGACATTATGGGATGCATTTGTAAGTTTTGGGGGATTGACGAAGGCTTTTGTCTATTTCTACCAGTACGA
ATCTTGAAAAGAAAAGATAGCATGAACACGAGGGCTAATAACTAGGAAATAGCGATTGGAGCGGAGGTAAACGTGGCATAGACCGATTTAGTACTT
TCATGGTCTATGTGCGAGTATCCTCTGATATCGAAGGTGGAGGAACGGAATTCCCACGTATCGTGGGACCAAAGGAGGAAGGTGGAGGACTTC
CTGGAAACTACGGAAGCATTGGATCCAAGAACTGGAGAAAATGTAACAGTAGAAGGGGTGACATTCAAACCAATCAAGGGAAATGCCGTATCTT
GGGAAAATACTGACAACAACGGGAGGGCTATGAT
```

```
>Bcin12g03020 (MLST8), partial sequence [organism=Botrytis cinerea, strain D13_MR_S4]
CGATTGGCTGCGAAGAAAACCTGCGCAGCACCGAGTCACCAAAAGCACGAATAAACCATCGGCAAGGGAAAATATTTCTCTGAACCACAACATGACA
CGAGCGCGGAAGAGTATATCGGGCGAGAAAGCTTCATCAAGAGCACCAAAAGCGACAACGAGTCGATGATAAATTATAACTCTTACGGTGGAAAGAAA
TGAAAATACAGCAGCTTATGCTTCCGGGAAAACCTCCATCTGGAAGTATAAATGTTGGTGGAGGTAGGAAGACCCTTTTCAAGAAGAACCCTCGA
ACGGCATTGTGCGTGGCAAGTTGCCCTTGGAAATATCAACATTGGTGGAAAGAAGGCTACCCAAATCGAGGACGAGGGTAGAGCAGCTTATG
CTTCCGGAAAATTTGCCCCAGGAAGTATAAACTCTGGCGCAAAGAAGGCGATTTCAATCCAAGATGAAACGAGACCGGCTTATGTCTCCGGAAA
GCTTCCACATGGTAGTATCGACGGTATGCGAAAACCGTGAAATGGCTGCCGTCCACCGCGAAAATTGCTGAGGGTGGGTGGAAACCAGGCCAGGTT
GTCTCTTCTCTATTACATTCATCTACTTCAAAGAAAACCTTTCGATGAACCAGAAGAACAAGCGGAACCGGCAAACCATCCAATGCGCCTT
TGACAGAGGAAAATGGCGACTTTCACCAATCTAGGGCTATCGAGAAGGCTTGCAGCCATCTATCGACTAACTCGATATGAAAGCCCCGACGGC
CATTCAAAAAGCATCTGTGCAGCAGTTGGTATCGGACGATAGCGATGCTTTCATACAAGCAGAGACTGGATCTGGAAAACCTTTGGCATATCTA
CTACCTATAGTCGAGCGAATATTAGCATTGAGTGAGAATGGCGTACAAA
```

```
>Bcin02g07770 (MLST9), partial sequence [organism=Botrytis cinerea, strain D13_MR_S4]
ACAGCTTTCCCTTTTCGGTCTTGGCATCTACAGTCATTGCCATCCCTACACCATCACAACTTGAGTCTCGGGCCGTTATCGATTCGGATGCCGTT
GTAGGATTTGCCGAAAACCTGTTCCAGTGGGACCGTAGGAACAGTTTATGAGGCATATAAACCATTCCTTAAAGTCGTAAATGGATGCGTACCAT
TCCCTGCCGTCGATGCATCGGGTAACACAGGGTATGTCTTATATCTTTCTCTTCCACACGATTGCTATTGAGTCTCTAACATATTTTAGTGGT
GGTTTGTACCAACTGGCAGTAGCAATGGTGGTTGCAGCAGCAGTACCGGTCAAGTATATGTTTCGAGGAGGACAAAAGCGGATCAAACCTACGCCA
TCATGTACTCCTGGTAAGTTCTCTCTAAACTTCTCCTTATAGATCCAACCTAACAAAATCTTAGGTACATGCCAAAGGACGAGCCCTCAACCGG
TATTGGTCACCGTCACGATTGGGAAGGTGTAATTGTCTGGCTCTCCAGCGCCACCGCCACAACCTGCCGACAACATCTTAGCCGTTTGTCTTCC
GCCACGGAGGCTGGGATTGTTCCACGGATGGCTATTCCTTTCTGGTACCAGCCCTTATCAAGTACGAAAGTATCTGGCCCGTCGATCACT
CAATGGGTCTTACTAGTACTGTTGGTGGAAAACAACCTATGATTGCTTGGGAGTCTTTACCAACTGCTGCTCAAACCTGCTCTTGAGAACACCGA
TTTTGGTGCTGCGAATGTTCCATTCAATCCGGCTGTTTTACAGACAATCT
```

```
>Bcin04g02090 (MLST10), partial sequence [organism=Botrytis cinerea, strain D13_MR_S4]
CGGAGGATGATATGGCAAAGTCTATGATTACCAAAGCATTGTAGGCATGAGTAGTAAATTTGTCGAATATGACTATGAATGATGTTTACAAGCC
CTACATCCATGTAAGAAAATGTAGAATAAAGAGATCAGTAACTGGAACATAATATCGTTTGCAGGCTTTCAGTTACTTACGCAGTTC AACCCAAT
CACTACAGCTATTGCCGAATCCCCTACTATTTCAAATGGCTGTCTCAGCAAATACCATCGAAAAGTACACACTGCTAGGCCCTTTCTTTCAGAATA
TCTCCTCTGCAACAGGAAGTTACCAGGGAATACTTCAGTGCGCCAAAAGACGATAGATAGGCGACACATTGCCACATCTCAAGATGCGTTACGAT
TGACCTTACAAAACCATCAAAAAAGATTTACTTGTATATCATCAACCCTTTGTTTCGAGCAAGTCCAATCGCAAAGCAAACCCCTGGATTGGTTT
GCCTACATTGTGAATCAAAAACACAAGCGTCGAGCACTTCAGGTAGACCCGAAAGAAGTGTCTTCTGATGGCTTTATGCACAATGTCACGTGTCG
TTCTAGATGGTCTTTGTGAGCCATTCATGGATACCACATTTCTCAAAAATTTGGAAGATTGATATTGATTATCTAAGACGTGCGCCCTCGTGTAGAT
ATCAAGGACGAGACCAAGTTGAACGCTGATGAGAAGGCTTCTGAGAAGTATTATGAGGACACTGTTCCCTGGCACTTCTAATTTTCATCTCTGAGG
TATTCTTTCTGACATTGGCTGCTCATCATTATGGTAGTGAAGCTCTTAATGCCACGCATAAGAGTCTGGAGAAAAGACATCAAATATATTCAAAA
GCAATTGACTGCCGTTGAAGCA
```

```
>Bcin01g07220 (MLST1), partial sequence [organism=Botrytis cinerea, strain D13_MR_S14]
ATGGCATATCTTGTCTTTTCGCATTATGCTTTGGAACGTGCTGGACAAGCTTGGGTTAGTGCTCTGCGTGTAGAAGCACTAAAGAAGATTCT
CGACAACCGAAGTCATGGTTTGGAGAAATCCAGGAATTCACCTGGCCGGTTGAACGAAGTTTTGGATAGGAACCTCGAGGAAATGCGTAATCTC
GTTGGCCGCTTTGCTGGTATTGTATTCACAGCATTTTTTATGCTATTTGATATCAATCATTTGGGCTTTTGTGAATACATGGAAACTGACATTAG
TCTCGATGGCAACTGGGCCAGTTATATACGCTGTCAACAAAACATTC AATCGCGTGAGTGGAAAATGGGAAAACAAGTGCAACTACGCCCTCTGA
AATGACCACTGGCATAATTTTCAGAGACTTCTCCAACATCAAAGTGGTTTCGGGCTTTTACTCTGGAAAACCTTACTTTGAGACAAAACACACCAA
GCTACAGGAGAACTTTATAAAGTTGGACTAATACGAGCAAACCTACTCGGGATTGCTGTGGGGATTGACAGATGCGATGTCATTTCTTACACTG
CAACTATCTTTTATTTATGCCACGGTTCTCATTACCAAGAGAGAGATCAGTATCGCGACTGCACTACAGACTGTCAATCTTCTATTTATTTGGTAT
TTCTAATAGTACGAATATGCTGGCCATGATACCACAAAATCAACTCTTCTCGGTTACAGCTACGCATATGCTTGCATTAGCCAATCTCGATTCA
TCTTCTCCACGAAAATAAAGGAACCGAACGGCTTTTCGACAATCTTTCCAATCAAATTC AACCGTCTTTTCATTACATAACCTACTCGTCTG
AAAAACGAACGATATCATCTTTTCTCTTTCCCTGATTCCTAACTCAACAACCTGCACCTTGTCCGACCCCTCCGGCTCCGAAAATCTACAATAGT
TGCTCTGCTCATTGGTCTCTATCCGCCAGATACTTCAACACCTCCACCGTTGACATTC AATCGCGTCTCCATAAGTAACTGTCACATTCGGTCT
CTCCGGGCTTCTCTCTCACTCGTTCCACAAAATACCGATTCTATTTCCAGCTACCATTCTCCATAACATCATTTATGGTCTCCAGAACTTCTCT
CTTGTGCTAGTCTTCCATCAGCTATTGCATCAGCAAAGATGCTGGGATCCATGAATTTATCACATCGCTTCCACAAGGTTATGATACTAT
```

>Bcin05g07690 (MLST2), partial sequence [organism=Botrytis cinerea, strain D13\_MR\_S14]  
ACC ACTATCACCAAGTCTTTCTGCGCTTTCCTCACCAAAAACGAACGAGAACATCATCAATAAACTTTGCTGAAGTAATTGGGTTTTATT  
TTGGCCAGGATGCTTCTCTCTACGACAGCAAGCCTTCGATGATATGTTGTGGGTAGTTCTTGGCTGGCTGGATACTGTCAAATTCATTGATTT  
ACATTCTGAATTGCACTATTCAAACGACTCTCAGCCAGAATGGTACGGACAACAATATAAACCTGCATTTGCACATCGAGCGGACTATTTTGG  
GAATTGGCTTACAAGGATGGGATACTACTCTCTGTGGTGGTGGATGATATGGTCACCATACCTTACTCCATAACAAGAACGCAATTACCAATG  
AACTCTATATCGCAGCTTCGATATCGATGTACCTATATTTCCCCGGAGATGACAATCAATCCCCATTTATGATTTCCAACCCCTCATATCCACC  
TCACGATCCGAAATATCTACAGGCAGCTGTTGATGCTTACAAATGGCTGAATGGTTCCAACATGACGGATTACAAGGATTATATGTCGACGGG  
TACCATATCTCGAATCTTTCTGGCGGTGAAAACACCCATTGCGATTCTAGAAATGAGATGGTATATACCTACAATCAAGGTGTTTTGCTTACTG  
GACAACGTGGTTTTGTATGACGCAACC GCCGACGATCATACCTTGTAGATGGCCACAACTCATCGCGAATGTTATTAATGCCACAGGCTATGA  
CCTGAAAACACAATGTTGTCTATCTCACC GCCACCCAAAAGATGGTTCCGCATTGGCCAAAGTGGTTTTGGCTGGGTAGGAATGGAATACTGGAAGAA  
GGATGCGATTCAAGTGCTTCGTGTTCTCAAAAATGGACAAACTTTCAAAGGCATATTTCTTTCATCATTGATTGCGTTCGTAGTGATTTGCCAG  
GGGGCTATTGCAGGGACGAAGGAAAGCTTAGAACTCGACAGAGTGTGGCATTCTGACAAATGCTCACAGTATACAAAAT

>Bcin06g01710 (MLST3), partial sequence [organism=Botrytis cinerea, strain D13\_MR\_S14]  
TCTGACACATTGGTGAGTCTGACTTTTGTGTTTGAGCGTTAAGATAGACACTGATGTACCAAGGCAATCACCTAATTTTCATGGCGTTCCTCCCT  
GCATCATCTACCTACCTGGAATGCTGGGAGAAATATACTCAGCAGCTTTACAGCACCTGCTTTCAATTGGTCTGTTCCCTGCCGTGACAGA  
ATTGGAGACGGTTGTAATGGATTGGCTGGCCAAGCTTCTCAATCTCCCAGACTGTTATTTGTCTTCGACTCATGGTGGTGGTGTATCCAAGGA  
TCAGCTCGGAAGCTATCGTTACC GTTATGGTTGCTGCCCCGATAAATATCTTCGTGAAACTACTGAAGGTCTGTGGGCATTGAACTCGAGG  
ATGCGATTGCATATAAGAGGAGTAAGCTAGTTGCACTAGGAAGCGAAAATGGCACACAGCTCCACGCAGAAAGCAGCGCAGATAGCTGGCGTTAG  
ATTCCGATCGATTCCAGTACTCGCATCCAATGATTTCCGCATGACGGGTGATGATTTAGAGAAGGTATTGGAAGAATGCAAATCTCAAGGATTG  
GAACCCCTTCTATCTAACTTCGACTTTGGGAACAACATCTACATGCGCAGTTGACGACTTCGCATCTATTGCAACAGTACTTTCAAAAATATGCAC  
CTCCAGATGTTGACAGCGAGATCTGGGTTACGTCGATGCTGCTTATGCAGGTGCAGCTTTGGTTTTGCCCTGAATACCATCATCTAACATCGTC  
CTTCCAGCATTTCCATTCCTTCGATATGAACATGCACAAAATGGCTTCTGACAAAATTCGACGCTTCTTGTCTATATGTCAAGAAACGCAAAGAT  
CTGATAGATGCACTCTCCATAACACCAAGTTATCTTCGCAACGAGTTTTTCAGAGAGTGGACTCGTAACCGACTATCGGGATTGGCAAATTCCTC  
TCGGAAGACGCTTCCGAAAGCTTAAAGATTTGGTCTGTCCCTCAGAACCCTAC

>Bcin09g03030 (MLST4), partial sequence [organism=Botrytis cinerea, strain D13\_MR\_S14]  
GACCCTTCAACCCACCGCAGCTCCTATAACGAAAGCGAGTATCCTAACCAATTTCTCCTTCCACCTGCGACTTTAAGACCATTGGCTTTCCGCA  
CTTTTCAAAAAAGCATAAGTTTAAACATTGACGTCGTCGGCATTACAAGTGTGGCTACTTTTTATTGGAAAGCATTGTGGGACAGGATGGAGGGAA  
GAAGGACTGGCAGAGAGAGTCTTGGAGGAGTTCGCCAAGAGTTGGAAGAATAGGAGTGGCGGTGTCATTGTGTCGAGGGCGAGGGAACGGAATTGA  
AGGAGATTCTGAAAGCTTTGGAAGGGAATATGAGTGGTGGAAAGGATAGTCATAGGAAGAGAGCTAAGCCGGCAGAATAGTTTAGTACTGGGATC  
ATCACAATATGGAGAGGTCAATCATACAAGACTTGGGCTACGGCCAGGGAATATACCCAGAGAGGATAGTCAGTCAAGTTTGGGAATGTCAACG  
TTGGAGGTCAATGACGAGGAAGATGAGGATGGCTGATGGATCCAAGGAGGTGGTTAAAAGTCATTGATGCATTTGAGCAACCTCGACTGGTGT  
ACAATGTTGCTAAAAAGCACTTTGATAGGTATGTTTCAATGATAAAAATTTTCATCTGAATCGACTAACTCAGTACAGAGATACCTCCAAACCTTC  
ATTGTTCCACCTGCGTCTCATAAAAACACTCCTCTTCCAAAACCGCTATAATGTTATCCATCAACGTCCTCTTCGCAATGAATCTTTTCAAACG  
CCCGCTTTTCAAGGTGGCAAATCTTCCCTTCAACGCAGCACGTCGCCATTACCACCAACAACAATCATACAAATTAACGCCGATAGCTAATCT  
TCTCGGTCGCAATCGCAGCTCTCATATGCTTCTCGTCTCCTCAGTATTTACCCACTGGTACCCTCGCCATCAATGACCTGACGGGCAGTATC  
GCTCTCGATCTTACACACGCAGCAGCCATT

>Bcin11g01310 (MLST5), partial sequence [organism=Botrytis cinerea, strain D13\_MR\_S14]  
ACTGACATGGACCTCATGTGAAACCGGCGTAGAATGCGCAACGCTTGAAGTTCGCTCGAATATGGCGATGCAACGTCAACGGCAAAGCCAGT  
GTTGCGCTTGCTCGTTATCTGCCACTGTTGCCGCGAGCAAGAAGCTCGGGTCTCTCTTGATAAAATCCCGGTGGACCCGGTGCCCTCTGGTGTG  
GCTTTGTGCACTCTGGAGCCGGTGCCGCCGCTCGACACTGAGTGGTGGATTGTACGATATCATCGGATGGGATCCACGTGGAACCGGTGCTTC  
GGCTCCTATTTTGAATGTTTTGCAAATGCCAGTGCAGGATGATTTTAAACAACGCTTTCCATCTGCTCCGAATCTCTGGCTCGGACAATTT  
GCGAATGCCAGCGCAAATTTGCTGTTAGCTCTGCTATCACATCCTTTGACACTTCTGTGCTGCTCTTGCAAAGCTTGGCTGGCTCAGAAAT  
CTCCCGCTCTTTACACCTCAACAGCAGCATATGTTGCTCGAGACATGGCAGCGATAGTCGATGCATTTGGATGGGACCTCTGCAAACCTTAACTA  
CTGGGGTTTCTCATATGGAATATCTTCCCTAGCTGAGTTTATCCAACTTTCCCAGGCCGCGTGGGAAGAGTTCTTGCCGATGGTGTTCGAC  
GCAAAGGCAAATGCACTCACATACGTTAGCCAACCTTCCAACGATCAACTCAGTGTTCGTGCTTCGTTGAACGATTTTGCAGCTTTCTGCACCA  
CCGCCGGTAGTAAAGGTTGCTCTTTTGCACC GCCCTACTGGAACCACAGGTAAGTGTGCTACCAGACTGGACAACATAATGAAGGATATGTT  
CCTCAATCCTATTGTTGCTTCGGGCTTAAAGCATCA

>Bcin15g03910 (MLST6), partial sequence [organism=Botrytis cinerea, strain D13\_MR\_S14]  
GCCAAAACACAAAATCATCCAACGATGAAGATGATACTCCACTTCCCTTGATTATCTGGCATGGACTCGGCCATAATTACAAAGCGGATGGTCT  
TGCGCAAGTTGGAAAAC TAGCTGAAGCTATTCATCTGGGACTTTTGTCTACAATATTCATGTAGATGAGGATGCATCTGCAGATAGGACAGCT  
ACCTTCTTTGAAAATCTCACTCGTGAGTACATCCCTATTTTTCTTTAAATATCATACTAACTCTCTTACCAAGTTCAAATCGAAAAGGCTCTG  
CGAAGACCTCGCCTCCATCCTATTCTCTTACC GCCGCCGCTCGACGCAATTTGGATTCTCCAAGGCCGCAATTTCTTGGCTGGTTACATA

```
TCCCCTGCAATGCTCCACCCATCCGCTCTCTCTGACCTTCGGTTCACACACAACGGCATTCTCTGCCTCCAAGCCTGTGGTCCCTGCCGATTT  
CCTCTGTGCGGGTGTCAAACCCCTTTTGGGATCCAACACCTGGTCAACCTTTGTCCAATCTCGTCTCGTACCCGCTCAATACTTCAGAGATCCG  
GAAAACCTAGACTCTTACCTTGAATATTTCAATTTCTTGGCCGACATCAATAATGAGCGCGTTCTCAAGAACCAAACATATAAAATCCAACATGG  
AAAAATTTGGAACGATTCGTAATGTATGTCTTTGAAGACGATACAACCTGTCATCCCTAAGGAAAGTGGATGGTGGGCTGAAGTCAACGGCAGCGA  
AGTTACACCCTGAAAAGAAAGACCCATTTATAAAGAAAGATTGGCTAGGTTTAAAGACATTGGATGAGGCCGAAAAATTAGTTTTCGAAACCATT  
CCAGGGGGACATATGACGTTAGGAGAGGAGATGCTAGAGAAGGCTTTCAAAGAGTATTTTGGTCCAGCAGGGAAGAAATTTGGG
```

```
>Bcin16g03460 (MLST7), partial sequence [organism=Botrytis cinerea, strain D13_MR_S14]  
ATGAACCTCTTGATTTGAACTCTTCATTAATTGCAAGTGATGAACCCCTATTCTGCCAGAGGATAGTTACAAGACGTATATCATTAGTTCGAGG  
ACCCTCATGATATATATTGACGGATTTTGAAGCGAATGAAAGTAAACATTTGGTTGATGTTAGGTGTGTTATTTATTTCTGATGAAATGAAC  
AAGAGAGACTGATGAGATAGTGAGCCGCTTTATGAACCGTCAACTGTTTCTCACGGACAGGAAGTTACCATTGATCCTTCAGTTCCGGAATTTCTG  
AAGTGGCGGTTTTAGAGAGGGATGAGGTGGTCAGGTGTATTGAGCATAGAGCGAGGGCATTTCAGGGGTGGAGGGGCGAGATGGGGATTGAGAA  
GTTGAGGACGCAGAGGTATGGGGTTGGAGGACATTATGGGATGCATTTGTAAGTTTTGGGGATTGACGAAGGCTTTTGTCTATTTTCTACCAG  
TACGGATCTTGAAAAGAAAGATAGCATGAACACGAGGGCTAATAACTAGGAAATAGCGATTGGAGCGGAGGTAAACGTGGCATAGACCGATTTAG  
TACTTTTCATGGTCTATGTGACGATATCCTCTGAATTTATCGAAGAGGTGGAGGAACGGAAATTTCCACGTATCGTGGGACCAAAGGAGGAAGGTG  
GGAGGACTTCTTGAAACTACGGAAGCATTGGATCCAAGAACTGGAGAAAATGTAACAGTAGAAGGGGTGACATTCAAACCAATCAAGGAAAT  
GCCGATTTCTGGGAAAATACTGACAACAACGGGAGGGGCTATGAT
```

```
>Bcin12g03020 (MLST8), partial sequence [organism=Botrytis cinerea, strain D13_MR_S14]  
CGATTGGCTGCGAAGAAAACCTGCGCAGCACCGAGTCACAAAAGCAGCAATAAACCATCGGCAAGGAAAATATTCTCTGAACCACAACATGACA  
CGAGCGCGAAGAGTATATCGGGCGAGAAGCTTCATCAAGAGCACCAAAGCGACAACGAGTCGATGATAAATTATAACTCTTACGGTGGAAAGAAA  
TGAAAATACAGCAGCTTATGCTTCCGGGAAAACCTCCATCTGGAAAGTATAAATGTTGGTGGAGGTAGGAAGACCCTTTTCAAGAAGAACCCTCGA  
ACGGCATTGTGCTGCAAGTTGCCCCCTGGAAGTATCAACATTTGGTGGAAAGAAGGCTACCCAAATCGAGGACGAGGGTAGAGCAGCTTATG  
CTTCCGAAAATTTGCCCCAGGAAGTATAAACTCTGGCGCAAAGAAGGCGATTTCAATCCAAGATGAAGCGAGACCGGCTTATGTCTCCGAAA  
GCTTCCACATGGTAGTATCGACGGTATGCGAAAACCGTGAATGGCTGCCGTCCACCGCGAAAATGCTGAGGGTGGGAGGAAACCAGGCCAGGTT  
GTCTCTTCTCTATTTACATTTCAATCCTACTTCAAAGAAAACCTTTTCGATGAACCAGAAGAACAAAGCGGAACCGGCAAACCATCCAATGCGCCTT  
TGACAGAGGAAAATGGCGACTTTACCAATCTAGGGCTATCGAGAAGGCTTGCAGCCCATCTATCGACTAAACTCGATATGAAAGCCCCGACGGC  
CATTCAAAAAGCATCTGTGCAGCAGTTGGTATCGGACGATAGCGATGCTTTCATACAAGCAGAGACTGGATCTGGAAAACCTTTGGCATATCTA  
CTACCTATAGTCGAGCGAATATTAGCATTGAGTGAGAATGGCGTACAAA
```

```
>Bcin02g07770 (MLST9), partial sequence [organism=Botrytis cinerea, strain D13_MR_S14]  
CAGCTTTCCCTTTTCGGTCTTGGCATCTACAGTCATTGCCATCCCTACACCATCACAACCTTGAGTCTCGGGCCGTTATCGATTCCGATGCCGTTG  
TAGGATTTGCCGAAAACCTGTTCCAGTGGGACCGTAGGAACAGTTTATGAGGCATATAAACCATTCCTTAAAGTCGTAAATGGATGCGTACCATT  
CCCTGCCGTCGATGCATCGGGTAACACAGGGTATGTCTTATATCTTTCTCTTCCACACGATTGCTATTGAGTCTCTAACATATTTTAGTGGTG  
GTTTGTACCAACTGGCAGTAGCAATGGTGGTTGCAGCAGCAGTACCGGTCAAGTATATGTTTCGAGGAGGACAAAGCGGATCAAACCTACGCCAT  
CATGTACTCTGGTAAAGTTCTCTCTAAAACCTTCTCTTATAGATCCAACCTAACAAAATCTTAGGTACATGCCAAAGGACGAGCCCTCAACCGGT  
ATTGGTCAACGTCACGATTGGGAAGGTGTAATTTGCTGGCTCTCCAGCGCCACCGCCACAACCTGCCGACAACATCTTAGCCGTTTTGTCTTCCG  
CCCACGGAGGCTGGGATTGTTCCACGGATGGCTATTTCCCTTTCTGGTACCAGCCCTTTATCAAGTACGAAAGTATCTGGCCCGTCGATCACTC  
AATGGGTCTTACTAGTACTGTTGGTGGAAAACAACCTATGATTGCTTGGGAGTCTTTACCAACTGCTGCTCAAACCTGCTCTTGAGAACACCGAT  
TTCGGTGTGCGAATGTTCCATTCATTCCGGCTGTTTTACAGACAATCT
```

```
>Bcin04g02090 (MLST10), partial sequence [organism=Botrytis cinerea, strain D13_MR_S14]  
CGGAGGATGATATGGCAAAGTCTATGATTACCAAAGCATTTGTAGGCATGAGTAGTAAATTTGTCGAATATGACTATGAATGATGTTTACAAGCC  
CTACATCCATGTAAGAAAATGTAGAATAAAGAGATCAGTAACTGGAACATAATATCGTTTTGCAGGCTTTCAAGTTACTTACGCAGTTCAACCCAAT  
CACTACAGCTATTGCCGAATCCCCACTATTTCAAATGGCTGTCTCAGCAGATACCATCGAAAAGTACACACTGCTAGGCCCTTTCTTTCAGAATA  
TCTCCTCTGCAACAGGAAGTTACCAGGGAATACTTCACTGGCGCCAAAAGACGATAGATAGGCGACACATTGCCACATCTCAAGATGCGTTACGA  
TTGACCTTACAAAACCCATCAAAAAGATTTACTTTGATATCATCAACCACTTTGTTTCGAGCAAGTCCAATCGCAAAAAGCAAACCCCTGGATTGGT  
TCGCCTACATTTGTAATCAAAAATCACAAGCGTCGAGCACTTCAGGTAGACCCGAAAGAAGTGTCTTCTGATGGCTTTATGCACAATGTCACGTG  
CGTTCTAGATGGTCTTTGTGAGCCATTTCATGGATACCACATTTCTCAAAAATTTTCGAAGATTGATATTGATTATCTAAGACGTGCGCCTCGTGTA  
GATATCAAGGACGAGACCAAGTTGAACGCTGAATGAGAAGGCTTCTGAGAAGTATTATGAGGACACTGTTTCTGGCACTTCTAATTTTTCATCTC  
TGAGGTATTCTTTCTGACATTGGCTGCTCATCATTTATGGTAGTGAAAGTCTTAATGCCACGCATAAGAGTCTGGAGAAAGACATCAAATATATT  
CAAAAAGCAATTTGACTGCCGTTGAAGCA
```

```
>Bcin01g07220 (MLST1), partial sequence [organism=Botrytis cinerea, strain D14_Heid15]  
ATGGCATATCTTGTCTTTTTCGCATTATGCTTTGGAACGTGCTGGACAAGCTTGGGTTAGTGTCTGCGTGTAGAAGCACTAAAGAAGATTCT  
CGACAACCGAAGTCATGGTTTTGAGGAATCCAGGAATTCACCTGGCCGTTGAACGAAGTTTTGGATAGGAACCTGAGGAAATGCGTAATCTC  
GTTGGCCGCTTTGCTGGTATTGATTCACAGCATTTTTTATGCTATTGATATCGATCATTTGGGCTTTCTGTAATACATGGAACCTGACATTAG
```



```
TCTCAATGGCAACTGGGCCAGTTATATATGCTGTCCACAAAACGCTCAATCGCGTGAGTGGAAAATGGGAAAACAAGTGCAACTACGCCCTCTGA  
AATGACCACTGGCATAATTTTCAGAGACTTTCTCCAACATCAAAGTGGTTCGGGCTTTTACTCTGGAAACTTACTTTGAGACAAAACACACAAA  
GCTACAGAAGAACTTTATAAAGTTGGATTAATACGAGCAAACACTACTCGGGATTGCTGTGGGGATTGACAGATGCGATGTCATTTCTCATCACTG  
CAACTATCTTTTATTATGCCACGGTTCTCATTACCAAGAGAGAGATCAGTATCGCGACTGCACTACAGACTGTCAATCTTCTATTATTTGGTAT  
TTCTAATAGTACGAATATGCTGGCCATGATACCACAAAATCAACTCTTCTCGGTTACAGCTACGCATATGCTTGCATTAGCCAATCTCGATTCA  
TCTTCTCCACGAAAATAAAGGAACCGAACGGCTTTTCGACAATCTTTCCAATCAAATTCACCGTCTCTCATTACATATCCTACTCGTCCGTG  
AAAAACGAACGATATCATCTTTTCTCTTTCCCTGATTCTAACTCAACAACGCACTTGTTCGGACCCCTCCGGCTCCGAAAATCTACAATAGC  
TGCTCTGCTCATTGGTCTCTATCTCCAGATACTTCAACACCTCCACCGTTGACATTCATCGCGTCTCCATAAGTAAGTGTACATTTCCGTCT  
CTCCGGGCTTCTCTCTCACTCGTCCACAAAATACCGATTCTATTTCCAGCTACCATTTCTCCATAACATCATTTATGGTCTCCAGAATCTTCTCC  
TTGTGCTAGTCTTCCATCTGCTATTCATCAGCAAAAGATGCTGGGATCCATGAATTTATCACATCGCTTCCACAAGGTTATGATACTAT
```

>Bcin05g07690 (MLST2), partial sequence [organism=Botrytis cinerea, strain D14\_Heid15]

```
ACCCTATACCAAGTCTTTTCTGCACTTTCTCATCAAAAACGAACGAGAATCATCAATAAAACTTTTGTGAAGTAATTGGGTTTATTT  
TGGCCAGGATGCCTTCTCTACGACAGCAAGCCTTCGATGATATGTTGTGGGTAGTTCTTGGCTGGCTGGATACTGTCAAATTCATTGATTTA  
CATTCTGAATTACACTATTCAAACGACTCTCAGCCAGAATGGTACGGACAACAATATAAACCTGCATTTGCACATCGAGCGGACTATTTTGGG  
AATTGGCTTCAAGGATGGGATACTACTCTCTGTGGTGGTGGGATGATATGGTACCATACCTCACTCCATAACAAGAACGCAATTACCAATGA  
ACTCTATATCGCAGCTTCGATATCAATGTACCTCTATTTCCCGGAGATGACAATCAATCCCATTTATGCTTTCCAACCTTCATATCCACCT  
CACGATCCGAAAATATCTACAGGCAGCTGTTGATGCTTACAAAATGGCTGAATGGTTCCAACATGACGGATTTACAAGGATTTATACGTCGACGGGT  
ACCATATCTCGAATCTTTCTGGCGGTGAAAACACCCATTGCGATTCTAGAAAATGAGATGGTATATACCTACAATCAAGGTGTTTTGCTTACTGG  
ACAACGTGGTTTTGTATGACGCAGCCGCCGACGATCATACTTGTAGATGGCCACAACTCATCGGAATGTTATTAATGCCACAGCTATGACC  
TGAAACACAATGTTGTCATCTCACCGCCACCCAAAGATGGTTCCGCATTGGCAAAGTGGTTTTGGCTGGGTAGGAATGGAATACGGAAGAAGG  
ATGCGATTCAAGTGTCTCGTGTCTCAAAAATGGACAAAATTTCAAAGGCATATTTCTTTACCACCTTGATTGCGTTCTGTAGTAATTTGCCAGGG  
GAGCCTATTGCAGGGACGAAGGAAGGCTAGAACTCGACAGAGTGTGGCATTCTGACAAATGCTCACAGTATACAAAAT
```

>Bcin06g01710 (MLST3), partial sequence [organism=Botrytis cinerea, strain D14\_Heid15]

```
GTGAGTCTGACTTTTGTATTTGAGCGTTAAGATAGACTCTGATATACCAAGGCAATCACCTAATTTTCATGGCGTTCTTCCCTGCATCATCTACC  
TACCCTGGAATGCTGGGAGAATTATACTCAGCAGCTTTACAGCTCCTGCTTTCAATTGGATCTGTTCCCTGCTGTGACAGAGTTGGAGACGG  
TTGTAATGGATTGGTTGGCCAAAGCTTCTCAATCTCCAGACTGTTATTTGTCGTCGACTCATGGTGGTGGTGTATCCAAGGATCAGCTCGGA  
AGCTATCGTTACCGTTATGGTTGCTGCCCGGATAAGTATCTTCGTGAAACCACTGAAGGTCGTGCGGAATTTGAACTCGAGGATGCGATTGCA  
TATAAGAGGAGTAAGCTAGTTGCACTAGGAAGCGAAAATGGCACACAGCTCCACGCAGAAAGCAGCGCAGATAGCTGGCGTTAGATTCCGATCGA  
TTCCAGTACTCGCATCCAATGATTTCCGCATGACGGGTGATGATTTAGAGAAGGTATTGAAAGAATGCAAATCTCAAGGATTGGAACCTTCTA  
TCTAACTTCGACGTTGGGAACAACATCTACATGCGCAGTTGACGACTTCGCATCTATTGCAACAGTACTTTCAAATATGCACCTCCAGATGTT  
GCAGGCGAGATCTGGGTTACGTCGATGCTGCTTATGCAGGTGCAGCTTTGGTTTGCCCTGAATACCATCATCTAACATCGTCTTCCAGCAT  
TCCATTCTTTGATATGAACATGCACAAAATGGCTTCTGACAAAATTTGACGCTTCTTGCCATATATGTCAAGAAACGCAAAGATCTGATCGATGC  
ACTCTCCATAACACCAAGTTATCTTCGCAACGAGTTTTTCAGAGAGTGGACTCGTAACCGACTATCGGGACTGGCAAATTCCTCTCGGAAGACGC  
TTCCGAAGCTTAAAGATTTGGTTTTGTCCAGAACCTAC
```

>Bcin09g03030 (MLST4), partial sequence [organism=Botrytis cinerea, strain D14\_Heid15]

```
CGACCTTCAACCCACCGCAGCTCTATACCGAAAGCGAGTATCTTACCAATTTCTCTTCCACCTGCGACTTTAAGACCATGGCTTTTTCGCA  
CTTTTCAAAAAAAGCATAGTTTAAACATTGACGTCGTCGGCATTACAAGTGTGGCTACTTTTATTGGAAAGCATTGTGGGACAGGATGGAGGGA  
GGAAGGACTGGCAGAGAGAGTCTTGGAGGAGGTCGCCAAGAGTTGGAAGAATAGGAGTGGCGGTGTCATTTGTCGAGGGCGAGGGAACGGAATTG  
AAGGAGATTCTGAAAGCTTTGGAAGGGAATATGAGTGGTGGAAAGGATAGTATAGGAAGAGAGCTAAGCCGGCAGAATAGTTTAGTACTGGGAT  
CATCACAATATGGAGAGGTCAATCATAACAAGACTTGGGCTACGGCCAGGGAATATAACCAGAGAGGATAGTCAAGTCAAGTTTGGGAATGTCAAC  
GTTGGAGGTCAATGACGAGGAAGATGAGGATGGCCTGATGGATCCAAGAGGTGGTTAAAAGTCTGTTGATGCATTTGAGCAACCTCGACTGGTG  
TACAATGTTGCTAAAAAGCACTTTGATAGGTATGTTTCAATGATAAAAATTTTATCTGAATCGGCTAACTCAGTACAGAGATACCTCCAAACCTT  
CATTGTTCCACCTGCGTCTCAAAAACACTCCTCTTCCAAAACCGCTATAATGTTATCCATCAACGTCCTCTTCGCAATGAATCTTTTCAAAC  
GCCCCTTTTCAAGGTGGCAAATCTTCCCTTCAACGCAGCAGCTCCGCCATTACCACCCAACAACAATCATACAAATTAACGCCGATAGCTAAT  
CTTCTCGGTGCGAATCGCAGCTCTCATATGCTTCTCGGTCTCCTCAGTATTTACCCACTGGTACCCTCGCCATCAATGACCTGACGGGCAGTA  
TCGCTCTTGATCTTACACACGCAGCAGCCATT
```

>Bcin11g01310 (MLST5), partial sequence [organism=Botrytis cinerea, strain D14\_Heid15]

```
ACTGACATGGACCTCATGTGGAACCGGCGTAGAATGCGCAACGCTTGAAGTTCCGCTCGAATATGGCGATGCAACGTCAACAGCAAAGCCAGT  
GTTGCGCTTGCTCGTTATCTGCCACTGTTGCCGCGAGCAAGAAGCTCGGGTCTCTTTGATAAAATCCCGTGGACCCGGTGCCCTGGTGTG  
GCTTTGTGAGTCTGGAGCTGGTGCCCGCTCTCGACACTGAGTGGTGGATTATACGATATCATCGGATGGGATCCACGTGGAACCGGTGCTTC  
GGCTCCTATTTTGGAAATGTTTTCGAAAATGCCAGTGGGAGTATGATTTTAAACAACGCGTTTCCATCTGCTCCGAATCTCTGGCTCGGACAATTT  
GCGAATGCCAGCGCAAATTTCTGCTGTTAGTCTGCTATCACATCTTTGACACTTCTGTGCTGCTCTTGCAAAAGCTTGGCTGGCTCAGAAAT  
CTCCCGCTCTTACACCTCAACAGCAGCATATGTTGCTCGAGACATGGCAGCGATAGTCGATGCATTTGGATGGGACCTCTGCAAACCTTAACTA
```

```
CTGGGGTTTCTCATATGGAACCTATCTTCCCTAGCTGAGTTTATCCAACTTTCCAGGCCGCTGGGAAGAGTTCTTGCCGATGGTGTTCGAC
GCAAAGGCAAATGCACTCACATACGTTAGCCAACCTCCCAACGATCAACTCAGTGTTCGTGCTTCGTTGAACGATTTTGCAGCTTCTGCGCCA
CCGCCGGTAGTAAAGGTTGCTCTTTTGCACCCGCCCTACTGGAACCTCAGGTAAGTGTTCGTACACAGACTGGACAACATAATGAAGGATATGTT
CCTCAATCCTATTGTTGCTTCGGGCTTAAGCATCAG
```

```
>Bcin15g03910 (MLST6), partial sequence [organism=Botrytis cinerea, strain D14_Heid15]
CGCCAAAACACAAAATCATCCAACGATGAAGATGATACTCCACTTCCCTTGATTATCTGGCATGGACTCGGCGATAATTACAAAGCGGATGGTC
TTGCGCAAGTTGGAAAACCTAGCTGAAGCTATTCATCCTGGGACTTTTGTCTATAATATTCATGTAGATGAGGATGCATCTGCAGATAGGACAGC
TACCTTCTTTGGAAATCTCACTCGTGAGTACATCCCTATTTTCTTTAAATACCATACTAACTCTTACCAAGTTCAAATCGAAAAGGTCCT
GCGAAGACCTCGCTCCCATCTATCTCTCTACCGCGCCCGCGTGCACGCAATTGGATTCTCCAAGGCGGCCAATTTCTTGC GCGGTTACAT
ATCCCGCTGCAATGCTCCACCCATCCGCTCTCTCCTGACCTTCGGTTCCCAACACAAACGGCATTTCTGCTTCCAAGCCTGTGGTCTGCCGAT
TTCTCTGTGCGGGTGCTCAAACCCCTTTTGGGATCCAACACCTGGTCAACCTTTGTCCAATCTCGTCTCGTACCTGCTCAATACTTCAGAGATC
CGAAAACCTAGACTCTTACCTTGAATATTCAAATTTCTTGGCGACATCAATAATGAGCGGTTCTCAAGAACCAAACATATAAATCCAACAT
GGAAAATTTGAACGATTCGTAATGTATGTCTTTGAAAGACGATACAACGTGCATCCCTAAGGAAAGTGGATGGTGGGCTGAAGTCAATGGCAGC
GAAGTTACACCCTGAAAAGAAAGACCATTTATAAAAGAAAGATTGGCTAGGGTTAAAGACATTTGGATGAGGCGGAAAATTTAGTTTTCGAAACCA
TTCCAGGGGGACATATGACGTTAGGAGAGGAGATGCTAGAGAAGGCTTTCAAAGAGTACTTTGGTCCAGCAGGGAAGAAAATTTGGG
```

```
>Bcin16g03460 (MLST7), partial sequence [organism=Botrytis cinerea, strain D14_Heid15]
TCATGAACCTCTTAATTTGAACTCTTCATTATTTGCAAGTGATGAACCCCTATTCCTGCCAGAGGATAGTTACAAGACGTATATCATTAGTCGA
GAACCACTCATGATATACATTGACGGATTTTGGAAAGCGAATGAAAGTAAACACTTGGTTGATGTTAGGTGTGTTATTTATTTCTGATGAAATGA
ACAAGAGAGACTGATGAGATAGTAAACCGCTTTATGAACCGTCTACTGTTTCTCACGGACAGGAAGTTACCATTGATCCTTCGGTTCGAAATTC
TGAAGTGGCGGTTTTAGAGAGGGATGAGGTGGTCAGGTGTATTGAGCATAGAGCGAGGGCATTTCCGGGTTGGAGGGGCGAGATGGGGATTGAGA
AGTTGAGGACGCAGAGGTATGGGGTTGGAGGACATTATGGGATGCATTTGTAAGTTTTGGGGGATTGACGAAGGCCTCTGTTTTATTTCTATCA
GTACGGATCTTGAAGAAAAGATAGCATGAACACGAGGGCTAATACTAGGAAATAGCGATTGGAGCGGAGGTAAACGTGGCATAGACCGATTTA
GTACTTTCATGGTCTATGTGACGATCTCTGATATCGAAGGTGGAGGAACGGAAATCCACGATATTGTGGGACCAAAGGAGGAAGGTGGGA
GGACTTCTGGAAAACCTACGGAAGCATTGGATCCAAGAACTGGAGAAAATGTAACAGTAGAAGGGGTGACATTTCAAACCAATCAAGGGGAATGCC
GTATTCTGGGAAAATACTGACAACAACGGGAGGGGCTATGATG
```

```
>Bcin12g03020 (MLST8), partial sequence [organism=Botrytis cinerea, strain D14_Heid15]
CGATTGGCTGCGAAGAAAACCTGCGCAGCACCGAGTCACCAAAAGCACGAATAAACCATCGGCAAGGGAATATTTCTCTGAACCACAACATGACA
CGAGCGCGGAAGAGTATATCGGGCGAGAAGCTTCATCAAGAGCACCAAAGCGACAACGAGTCGATGATAAATTATAACTCTTACGGTGGAAAGAAA
TGAGAATACAGCAGCTTATGCTCCGGGAAAACCTCCATCTGGAAGTATAAATGTTGGTGGAGGTAGGAAGACCACTTTTCAAGAAGAACCCTCGAA
CGGCATTTGTGCTGGCAAGTTGCCCCCTGGAAGTATCAACATTTGGTGGAAAAGAAAGGCTACCCAAAATCGAGGACGAGGGTAGAGCAGCTTATGC
TTCCGGAAAATTTGCCCCAGGAAGTATAAACTCTGGCGCAAAGAAGGCGATTTTCATTTCCAAGATGAAACGAGACCAGGCTTATGTCTCTGGAAAG
CTTCCACATGGTAGTATCGACGGTATGCGAAAACCGTGGAAATGGCTGCCGTCCACCGCGAAAATGCTGAGGGTGGGAGGAAACCAGGCCAGGTTG
TCTCTTCTCTATTACATTTCAATCCTACTTCAAAGAAAACCTTTCGATGAACCCGAAAGAACAAGCGGAACCGGCAAAACCATCCAATGCACCTTT
GACAGAGGAAAATGGCGACTTTACCAATCTAGGGTTATCGAGAAGGCTTGCAGCCCATCTATCGACTAAACTCGATATGAAAGCCCCGACCGCC
ATTCAAAAGCATCTGTGCAGCAGTTGGTATCGGACGATAGCGATGCTTTTATAACAAGCAGAGACTGGATCTGGAAAACCTTTGGCATATCTAC
TACCTATAGTCGAGCGAATATTAGCATTTGAGTGAGAATGGCGTACAAAAT
```

```
>Bcin02g07770 (MLST9), partial sequence [organism=Botrytis cinerea, strain D14_Heid15]
TTACAGCTTTCCCTTTCCGGTCTTGGCATCTACAGTCATTTGCCATCCCTACACCATCACAACCTTGGTCTCGGGCCGTTATCGATTCGGATGCCG
TTGTAGGATTTGCCGAAAACCTGTTCCAGTGGGACCGTAGGAACAGTTTATGAGGCATATAAACCATTTCTTAAAGTCTGTAATGGATGCGTACC
ATTCCCTGCCGTCGATGCATCGGGTAAACACAGGGTATGTCTTTATACCATTCTCTTCCACACGATTGCTATTGAGTCTCTAACATATTTTAGTG
GTGGTTTGTACCAACTGGCAGTAGCAATGGTGGTTGCAGCAGCAGTACCGGTCAATTTATATGTTTCGAGGAGGACAAAGCGGATCAAACCTACGC
CATCATGTACTCCTGGTAAAGTTCTCTTAAACTTCTCCTTATAGATCCAACCTAACAAAATCTTAGGTACATGCCAAAGGACGAGCCCTCAACC
GGTATTGGTACCCGTCACGATTTGGGAAGGTGTAATTTGTCTGGCTCTCAAGCGCCACCGCCACAACCTGCCGACAACATCTTAGCCGTTTGTCTT
CCGCCCACGGAGGCTGGGATTGTTCCACCGATGGATATTTCCCTTTCTGGTACCAGCCCTCTTATCAAGTACGAAAGTATCTGGCCCGTGCATCA
TTCAATGGGTCTTACTAGTACTGTTGGTGGAAAACAACCTATGATTGCTTGGGAGTCTTTACCAACTGCTGCTCAAACCTGCTCTTGGAGAACC
GATTTCCGGTGTGCGAATGTTCCATTCATTTCCGGCTGTTTTTCACAGATAATCT
```

```
>Bcin04g02090 (MLST10), partial sequence [organism=Botrytis cinerea, strain D14_Heid15]
CGGAGGATGATATGGCAAAGTCTATGATTACCAAAGCATTTGTAGGCATGAGTAGTAAACTGTCGAATATGACTATGAATGATGTTTACAAGCC
CTACATCCATGTAAGAAAATGTAGAATAGAGAGATCAGTAACTGGAACATAATATCGTTTGCAGGCTTTCAAGTTACTTACGCAGTTCAACCCAAAT
CACTACAGCTATTGCCGAATCCCCACTATTTCAAATGGCTGTCTCAGCAAATACCATCGAAAAGTACACACTGCTAGGCCCTTTCTTTCAGAATA
TCTCCTCTGCAACAGGAAGTTACCAGGGAATACTTCAAGTGCGCCAAAGACGATAGATAGGCGACACATTTGCCACATCTCAAGATGCCCTTACGAT
TGACCTTACAAAACCATCAAAAAGATTTACTTGTATATCATCAACCACTTTGTTTCGAGCAAGTCCAATCGCCAAAAGCAAACCCCTGGATTGGTT
```

```
CGCCTACATTGTGAATCAAAATCACAAGCGTCGAGCACTTCAGGTAGACCCGAAAGAAGTGTCTTCTGATGGTTTTATGCACAATGTCACCTGTC
GTTCTAGATGGTCTTTGTGAGCCATTCATGGATACCACATTTCTCAAAAATTTGAAAGATTGATATTGATTATCTAAGACGTGCGCCTCGTGTAG
ATATCAAGGACGAGACCAAGTTGAACGCTGATGAGAAAGGCTTCTGAGAAATATTATGAGGACACTGTTCCCTGGCACTTCTAATTTTCATCTCTGA
GGTCTTCTTTCTGACATTGGCTGCTCATCATTATGGTAGTGAAGCTCTTAATGCCACGCATAAGAGTCTGGAGAAAGACATCAAATATATTTCAA
AAGCAATTGACTGCCGTTGAAGCA
```

```
>Bcin01g07220 (MLST1), partial sequence [organism=Botrytis cinerea, strain D14_Kill]
ATGGCATATCTTGTCTTTCTTTTCGCATTATGCTTTGGAACGTGCTGGACAAGCTTGGGTTAGTGTCTGCGTGTAGAAGCACTAAAGAAGATTCT
CGCACAACCGAAGTCATGGTTTGAGGAATCCAGGAATTCACCTGGCCGGTTGAACGAAGTTTTGGATAGGAACCTGAGGAAATGCGTAATCTC
GTTGGCCGCTTTGCTGGTATTGTATTCACAGCATTTTTTATGCTATTGATATCAATCATTTGGGCTTTTCGTGAATACATGGAAACTGACATTAG
TCTCGATGGCAACTGGGCCAGTTATATACGCTGTCAACAAAACGTTCAATCGCGTGAGTGGAAAATGGGAAAACAAGTGAACCTACGCCTCTGA
AATGACCACCTGGCATATTTTCAGAGACTTTCTCCAACATCAAAGTGGTTCGGGCTTTTACTCTGGAACCTTACTTTGAGACAAAACACACCCAAA
GCTACAGAAGAACTTTATAAAGTTGGACTAATACGAGCAAACCTACTCGGGATTGCTGTGGGATTGACAGATGCGATGTCATTTCTTCATCACTG
CAACTATCTTTTATTATGCCACGCTTCTCATTACCAAGAGAGAGATCAGTATCGCGACTGCACCTACAGACTGTCAATCTTCTATTATTTGGTAT
TTCTAATAGTACGAATATGCTGGCCATGATACCACAAAATCAACTCTTCTCGCGTTACAGCTACGCATATGCTTGTATTAGCCAATCTCGATTCA
TCTTCTCCACGAAAATAAAGGAACCGAACGGCTTTGACAACTTTTCCAATCAAATTCACCGTCTCTCATTCACATATCCTACTCGTCCCTGA
AAAACGAACGATATCATCTTTCTCTTTCCCTGATTCTTAACCTCAACAACCTGCACCTTGTGCGACCCTCCGGCTCCGGAAAATCTACAATAGCT
GCTCTGCTCATTGGTCTTTATCCGCCAGATATTTCAACACCTCCACCGTTGACATTCATTCGCGTCTCCATAAGTAACTGTCACATTCGGTCTC
TCCGGGCTTCTCTCTCACTCGTCCACAAAATACCGATTCTATTTCCAGCTACCATTCTCCATAACATCATTTTATGGTCTCCAGAACTTCTCTCT
TGTGCTAGTCTTCCATCTGCTATTGCATCAGCAAAAAGATGCTGGGATCCATGAATTTATCACATCGCTTCCACAAGGTTATGATACTATG
```

```
>Bcin05g07690 (MLST2), partial sequence [organism=Botrytis cinerea, strain D14_Kill]
ACCACTATCACCAAGTCCTTTTCTGCACTTTCCCTCATCAAAAACGAACGAGAACATCATCAATAAAATACTTTGCTGAAGTAATTGGGTTTTATT
TTGGCCAGGATGCCTTCTCTACGACAGCAAGCCTTCGATGATATGTTGTGGGTAGTTCTTTGGCTGGCTGGATACTGTCAAATTCATTGATTT
ACATTCTGAATTGCACTATTCAAAACGACTCTCAGCCAGAAATGGTACGGACAACAATATAAACCTGCATTTGCACATCGAGCGCGACTATTTTGG
GAATTGGCTTTCACAAGGATGGGATACTACTCTCTGTGGTGGTGGGATGATATGGTCACCATACTTACTCCATAACAAGAACGCAATTACCAATG
AACTCTATATCGCAGCTTCGATATCGATGTACCTATATTTCCCCGGAGATGACAATCAATCCCCATTTATGCTTTCCAACCCCTTCATATCCACC
TCACGATCCGAAATATCTACAGGCAGCTGTTGATGCTTACAAATGGCTGAATGGTTCCAACATGACGGATTTACAAGGATTTATATGTCGACGGG
TACCATATCTCGAATCTTTCTGGCGGTGAAAAACCCCATTTGCGATTCTAGAAATGAGATGGTATATACCTACAATCAAGGTGTTTTGCTTACTG
GACAACGTGGTTTTGTATGACGCAACCGCCGACGATCATACCTTGTAGATGGCCACAAACTCATCGCAATGTTATTAATGCCACAGGCTATGA
CCTGAAACACAATGTTGTCATCTCACCGCCACCCAAAGATGGTTCCGCATTGGCAAAGTGGTTTTGGCTGGGTAGGAATGGAATACTGGAAGAA
GGATGCGATTCAAGTGCTTCGTGTTCTCAAAAATGGACAAAATTTCAAAGGCATATTTCTTTTCATCACTTGAATTGCGTTCGTAGTGAATTTGCCAG
GGGAGCCTATTGCGAGGACGAAGGAAAAGCTTAGAACTCGACAGAGTGTGGCATTCTGACAAAATGCTCACAGTATACAAAAT
```

```
>Bcin06g01710 (MLST3), partial sequence [organism=Botrytis cinerea, strain D14_Kill]
GGTGAGTCTGACTTTTGTATTTGAGCGTTAAGATAGACACTGATATACCAAGGCAATCACCTAATTTTCATGGCGTTCTTCCCTGCATCATCTAC
CTACCCTGGAATGCTGGGAGAATTATACTCAGCAGCTTTCACAGCACCTGCTTTCAATTTGGATCTGTTCCCTGCTGTGACAGAATTGGAGACG
GTTGTAATGGATTGGCTGGCCAAGCTTCTCAATCTCCAGACTGTTATTTGTCTTCGACTCATGGTGGTGGTGTATCCAAGGATCAGCCTCGG
AAGCTATCGTTACCGTTATGGTTGCTGCCCAGGATAAATATCTTCGTGAAACTACTGAAGGTCTGTGCGGCATTGAACCTCGAGGATGCGATTGC
ATATAAGAGGAGTAAGCTAGTTGCACTAGGAAGCGAAAATGGCACACAGCTCCACGCAGAAAGCAGCGCAAATAGCTGGCGTTAGATTTCCGATCG
ATTCCAGTACTCGCATCCAATGATTTTCGCCATGACGGGTGATGATTTAGAGAAGGTATTGAAAGAATGCAAATCTCAAGGATTTGGAACCCCTTCT
ATCTAACTTCGACTTTGGGAACAACATCTACATGCGCAGTTGACGACTTCGCATCTATTGCAACAGTACTTTCAAAAATATGCACCTCCAGATGT
TGCAGGCGAGATCTGGGTTACGCTGATGCTGCTTATGCAAGTGCAGCTTTGGTTTTGCCCTGAATACCATCATCTAACATCGTCTTTCCAGCAT
TTCCATTCCCTTCGATATGAACATGCACAAAATGGCTTCTGACAAAATTTGACGCTTCTTGTCTATATGTCAAGAAACGCAAAGATCTGATCGATG
CACTGTCCATAACACCAAGTTATCTTTCGCAACGAGTTTTTCAGAGAGTGGACTCGTAACCGACTATCGGGACTGGCAAATTCCTCTCGGAAGACG
CTTCCGAAGCTTAAAGATTTGGTTTTGTCTCAGAACCTAC
```

```
>Bcin09g03030 (MLST4), partial sequence [organism=Botrytis cinerea, strain D14_Kill]
ACCCCTCAACCCACCGCAGCTCCTATACCGAAAGCGAGTATCTTACCAATTTCTCTTCCACCTGCGACTTTAAGACCATTGGCTTTCCGCACT
TTCACAAAAAAGCATAGTTTAAACATTTGACGTCGTGCGCATTACAAGTGTGGCTACTTTTTATTGGAAAGCATTTGTGGGACAGGATGGAGGGAAG
AAGGACTGGCAGAGAGAGTCTTGGAGGAGGTCGCCAAGAGTTGGAAAGATAGGAGTGGCGGTGTCAATTGTGCGAGGGCGAGGGAACGGAATTGAA
GGAGATTCTGAAAGCTTTGGAAGGGAATATGAGTGGTGGAAAGGATAGTTCATAGGAAGAGAGCTAAGCCGACAGAATAGTTTAGTACTGGGATCA
TCACAATATGGAGAGGTCAATCATAAAGACTTTGGGCTACGGCCAGGGAATATACCCAGAGAGGATAGTCAAGTGTGGGAATGTCAACGT
TGGAGGTCAATGACGAGGAAGATGAGGATGGCCTGATGGATCCAAGAAGGTGGTTAAAAGTCATTGATGCATTTGAGCAACCTCGACTGGTGTGA
CAATGTTGCTAAAAAGCACTTTGATAGGTATGTTTCAATGATAAAAATTTTATCTGAATCGACTAACTCAGTACAGAGATACCTCCAAACCTTCA
TTGTTCCACCTGCGTCTCATAAAAACCTCCTTCTCCAAAACCGCTATAATGTTATCCATCAACGTCTCCTTTCGCAATGAATCTTTTCAAACGC
CCGCTTTTCAAAGGTGGCAAATCTTCCCTTCAACGCAGCAGCTCCGCCATTACCACACAACAACAATCATACAAATTAACGCCGATAGCTAATCT
```

TCTCGGTCGCAATCGCAGCTCTCATATGCTTCTCGGTCTCCTCAGTATTTACCCACTGGTACCCTCGCCATCAATGACCTGACGGGCAGTATC  
GCTCTCGATCTTACACACGCAGCAGCCATTC

>Bcin11g01310 (MLST5), partial sequence [organism=Botrytis cinerea, strain D14\_Kill]

GACTGACATGGACCTCATGTGGAACCGGCGTTAGAATGCGCAACGCTTGAAGTTCGCTCGAATATGGCGATGCAACGTCAACGGCAAAGCCA  
GTGTTGCGCTTGCTCGTTATCTGCCACTGTTGCCGCGAGCAAGAAGCTCGGGTCTCTTTGATAAACCCCGGTGGACCCGGTGCCCTCTGGTGT  
TGGCTTTGTGCAGTCTGGAGCCGGTGCCCGCTCTCGACACTGAGTGGTGGATTGTACGATATCATCGGATGGGATCCACGTGGAACCGGTGCT  
TCGGCTCCTATTTTTGGAATGTTTTGCAAATGCCAGTGCCGAGTATGATTTTAAACAACGCGTTTCCATCTGCTCCGAATCTCTGGCTCGGACAAT  
TTGCGAATGCCAGCGCAAATTTCTGCTGTTAGCTCTGCTATCACATCCTTTGACACTTCTGTGCTGCTCTTGCAAAAGCTTGGCTGGCTCAGAA  
ATCTCCCGCTCTTTACACCTCAACAGCAGCATATGTTGCTCGAGACATGGCAGCGATAGTCGATGCATTTGGATGGGACCTCTGCAAACTTAAC  
TACTGGGGTTTTCTCATATGGAACATCTTCCCTAGCTGAGTTTATCCAACTTTCCAGGCCGCGTGGGAAGAGTTCTTGCCGATGGTGTTCGAC  
CGCAAAGGCAAATGCACTCACATACGTTAGCCAACTTCCCAACGATCAACTCAGTGTTCGTGCTTCGTTGAACGATTTTGCAGCTTTCTGCACC  
ACCGCCGGTAGTAAAGGTTGCTCTTTTGCCACCGCCCTACTGGAACCACAGGTACTGTTGCTACCAGACTGGACAACATAATGAAGGATATGT  
TCCTCAATCCTATTGTTGCTTCGGGCTTAAGCATCA

>Bcin15g03910 (MLST6), partial sequence [organism=Botrytis cinerea, strain D14\_Kill]

GCCAAAACACAAAATCATCCAACGATGAAGATGATACTCCACTTCCCTTGATTATTGGCATGGACTCGGCGATAATTACAAAGCGGATGGTCTT  
GCGCAAGTTGGAAAACCTAGCTGAAGCTATTCATCCTGGGACTTTTGTCTACAATATTCATGTAGATGAGGATGCATCTGCAGATAGGACAGCTA  
CCTTCTTTGGAAATCTCACTCGTGAGTACATCCCCTATTTTCCCTTTAAATACCATACTAACTCTTTACCAAGTTCAAATCGAAAAGGTCTGC  
GAAGACCTCGCCTCCCATCCTATTCTCTTACCGCGCCGCGCTCGACGCAATTGGATTCTCCAAGGCGGCCAATTTCTTGCGCGTTACATAT  
CCCGCTGCAATGCTCCACCCATCCGCTCTCTCTGACCTTCGGTTCCCAACACAACGGCATTCTGCCCTCCAAGCCTGTGGTCTGCCGATTT  
CCTCTGTGCGGGTCTCAAAACCCTTTTGCGATCCAACACCTGGTCAACCTTTGTCCAATCTCGTCTCGTACCCGCTCAATACTTCAGAGATCCG  
GAAAACCTAGACTCTTACCTTGAATATTTCCAATTTCTTGCCGACATCAATAATGAGCGGTTCTCAAGAACCAAACATATAAATCCAACATGG  
AAAAATTGAAACGATTCGTAATGTATGCTTTGAAGACGATACAACGTTCATCCCTAAGGAAAGTGGATGGTGGGCTGAAGTCAACGGCACGGA  
AGTTACACCCTGAAAAGAAAGAGCCATTTATAAAGAAAGATTGGCTAGGTTTAAAGACATTTGGATGAGGCGGAAAATTAGTTTTCGAAACCATT  
CCAGGGGGACATATGACGTTAGGAGAGGAGATGCTAGAGAAGGCTTTCAAAGAGTATTTTGGTCCAGCAGGGAAAGAAATTTGGG

>Bcin16g03460 (MLST7), partial sequence [organism=Botrytis cinerea, strain D14\_Kill]

ATGAACCTCTTGATTTGAACTCTTCATTAATTTGCAAGTGATGAACCCCTATTTCTGCCAGAGGATAGTTACAAGACGTATATCATTTAGTCGAGA  
ACCCTCATGATATATATTGACGGGTTTTTGAAGCGAATGAAAGTAAACATTTGGTTGATGTTAGGTGTGTTATTTATTTCTGATGAAATGAAC  
AAGAGAGACTGATGAGATAGTGAGCCGCTTTATGAACCGTCAACTGTTTCTCACGGACAGGAAGTTACCATTGATCCTTCAGTTCCGAAATCTG  
AAGTGGCGGTTTTAGAGAGGGATGAGGTGGTCAGGTGTATTGAGCATAGAGCGAGGGCATTTCAGGGGTGGAGGGGCGAGATGGGGATTGAGAA  
GTTGAGGACCGCAGAGGTATGGGGTTGGAGGACATTATGGGATGCATTTGTAAGTTTTGGGGGATTGACGAAGGCTTCTGTCTATTTTCTATCAG  
CACGGATCTTGAAAAGAAAGATAGCATGAACACGCGGGCTAATAACTAGGAAATAGCGATTGGAGCGGAGGTAAACGTGGCATAGACCGATTTAG  
TACTTTTATGGTCTATGTCGACGATCCTCTGATATCGAAGGTGGAGAACGGAATTTCCACGTATCGTGGGACAAAAGGAGGAAGGTGGGAG  
GACTTCTTGAAAACCTACGGAAGCATTTGGATCCAAGAACTGGAGAAAATGTAACAGTAGAAGGGGTGACATTCAAACCAATCAAGGGAAATGCCG  
TATTCTGGGAAAATACTGACAACAACGGGAGGGGCTATGAT

>Bcin12g03020 (MLST8), partial sequence [organism=Botrytis cinerea, strain D14\_Kill]

CGATTGGCTGCGAAGAAAACCTGCGCAGCACCGAGTCAACAAAAGCACGAATAAACCATCGGCAAGGAAAATATTTCTCTGAACCACAACATGACA  
CGAGCGCGGAAGAGTATATCGGGCGAGAAGCTTCATCAAGAGCACCAAAGCGACAACGAGTCGATGATAATTATAACTCTTACGGTGGAAAGAAA  
TGAAAATACAGCAGCTTATGCTTCCGGGAACTTCCATCTGGAAGTATAAATGTTGGTGGAGGTAGGAAGACCCTTTTCAAGAAGAACCCTCGA  
ACGGCATTGTGCTGTCGCAAGTTGCCCCCTGGAAGTATCAACATTTGGTGGAAAGAAAGGCTACCCAAATCGAGGACGAGGGTAGAGCAGCTTATG  
CTTCCGGAAAATTTGCCCCAGGAAGTATAAACTCTGGCGCAAAGAAGGCGATTTCATTCCAAGATGAAACGAGACCGGCTTATGTCTCCGGAAAG  
CTTCCACATGGTAGTATCGACGGTATGCGAAAACCGTGAATGGCTGCCGTCCACCGCGAAAATGCTGAGGGTGGGAGGAAACCAGGCCAGGTTG  
TCTCTTCTTATTCACATTCATCCTACTTCAAAGAAAACCTTTCGATGAACCAGAAGAACAAGCGGAACCGGCAAACCATCCAATGCGCCTTT  
GACAGAGGAAATGGCGACTTTCACCAATCTAGGGCTATCGAGAAGGCTTGCAGCCCCTATTCGACTAAACTCGATATGAAAGCCCCGACGGCC  
ATTCAAAAGCATCTGTGCAGCAGTTGGTATCGGACGATAGCGATGCTTTCAATACAAGCAGAGACTGGATCTGGAAAACCTTTGGCATATCTAC  
TACCTATAGTCGAGCGAATATTAGCATTGAGTGAGAATGGCGTACAAAT

>Bcin02g07770 (MLST9), partial sequence [organism=Botrytis cinerea, strain D14\_Kill]

CAGCTTTCCCTTTTCGGTCTTGCCATCTACAGTCAATTGCCATCCCTACACCATCACAACTTGAGTCTCGGGCCGTTATCGATTCCGATGCCGTTG  
TAGGATTTGCCGAACTGTTCCAGTGGGACCGTAGGAACAGTTTATGAGGCATATAAACCATTCCTTAAAGTCGTAATGGATGCGTACCATT  
CCCTGCCGTCGATGCATCGGGTAACACAGGGTATGTCTTATATCTTTCTCTTCCACACGATTGCTATTGAGTCTCTAACATATTTTAGTGGTG  
GTTTGTACCAACTGGCAGTAGCAATGGTGGTTGCAGCAGCAGTACCGGTCAAGTATATGTTTCGAGGAGGACAAAGCGGATCAAACCTACGCCAT  
CATGTACTCCTGGTAAAGTTCTCTCTAAACTTCTCCTTATAGATCCAACCTAACAAAATCTTAGGTACATGCCAAAGGACGAGCCCTCAACCGGT  
ATTGGTCAACGTCACGATTGGGAAGGTGTAATTTGCTGGCTCTCCAGCGCCACCGCCACAACCTGCCGACAACATCTTAGCCGTTTGTCTTCCG

```
CCCACGGAGGCTGGGATTGTTCCACGGATGGCTATTCCCTTTCTGGTACCAGCCCTTTATCAAGTACGAAAGTATCTGGCCCCGTCGATCACTC  
AATGGGTCTTACTAGTACTGTTGGTGAAAAACAACCTATGATTGCTTGGGAGTCTTTACCAACTGCTGCTCAAACCTGCTCTTGAGAACACCGAT  
TTCGGTGTGCGAATGTTCCATTCATTCGGGCTGTTTTTCACAGACAATCT
```

```
>Bcin04g02090 (MLST10), partial sequence [organism=Botrytis cinerea, strain D14_Kil1]  
CGGAGGATGATATGGCAAAGTCTATGATTACCAAAGCATTTGTAGGCATGAGTAGTAAACTGTGCAATATGACTATGAATGATGTTTACAAGCC  
CTACATCCATGTAAGAAAATGTAGAATAGAGAGATCAGTAACTGGAACATAATATCGTTTTGTAGGCTTTCAAGTTACTTACGCAGTTCAACCCAAT  
CACTACAGCTATTGCCGAATCCCCACTGTTTCAAATGGCCGCTCTCAGCAAATACCATCGAAAAGTACACACTGCTAGGCCCTTTCTTCAGAATA  
TCTCCTCTGCAACAGGAAGTTACCAGGGAATACTTCACTGCGCCAAAGACGATAGATAGGCGACACATGCCACATCTCAAGATGCGTTACGAT  
TGACCTTACAAACCCATCAAAAAGATTTACTTGTATATCATCAACCACTTTGTTTCGAGCAAGTCCAATCGCAAAAAGCAAAACCCCTGGATTGGTT  
CGCCTACATTGTGAATCAAAAATCACAAGCGTCGAGCACTTCAGGTAGACCCGAAAAGAGTGTCTTCTGATGGCTTTATGCACAATGTCACCTGTC  
GTTCTAGATGGTCTTTGTGAGCCATTTCATGGATACCACATTTCTGAAAATTTGCAAGATTGATATTGATTATCTAAGACGTGCGCCTCGTGTAG  
ATATCAAGGACGAGACCAAGTTGAACGCTGACGAGAAGGCTTCTGAGAAGTATTATGAGGACACTGTTCTGGCACCTTCAATTTTCATCTCTGA  
GGTCTTCTTTCTCACATTGGCTGCTCATATTATGGTAGTGAAGCTCTTAATGCCACGCATAAGAGTCTGGAGAAAAGACATCAAATATATTTCAA  
AAGCAATTGACTGCCGTTGAAGCA
```

```
>Bcin01g07220 (MLST1), partial sequence [organism=Botrytis cinerea, strain D14_Kil2]  
GATGGCATATCTTGTCTTTTCGCATTATGCTTTGGAACGTGCTGGGCAAGCTTGGGTTAGTGCTCTGCGTGTAGAAGCACTAAAGAAGATTC  
TCGCACAACCGAAGTCATGGTTTGGAGGAATCCAGGAATTCACCTAGCCGGTTGAACGAAGTTTGGATAGGAACCTCTGAGGAAATGCGTAATCT  
CGTTGGCCGCTTTGCTGGTATTGTATTACAGCATTTTTTATGCTATTGATATCAATCATTTGGGCTTTCTGTAATACATGGAAACTGACATTA  
GTCTCAATGGCAACTGGGCCAGTTATATACGCTGTCACCAAAACGTTCAATCGCGTGAGTGGAAAATGGGAAAACAAGTGAACCTACGCATCTG  
AAATGACCACTGGCATATTTTCAGAGACTTTCTCCAACATCAAGTGGTTTCGGGCTTTTACTCTGGAACTTACTTTGAGACAAAACACACCAAA  
GCTACAGAAGAACTCTATAAAGTTGGACTAATACGAGCAAACCTACTCGGGATTGCTGTGGGGATTGACAGATGCGATGTCATTTCTCATCACTG  
CAACTATCTTTTATTATGCCACGGTCTCATTACCAAGAGAGAGATCAGTATTGCGACTGCACTACAGACTGTCAATCTTCTATTATTTGGTAT  
TTCTAATAGTACGAATATGCTGGCTATGATACCACAAAATCAACTCTTCTCGCGTTACAGCTACGCATATGCTTGCATTAGCCAATCTCGATTCA  
TCTTCTCCACGAAAATAAAGGAACCGAACGGCTTTTCGACAATCTTTCCAACCAAATTCACCCGCTTTTCATTCACATACCCTACTCGTCTG  
AAAAACGAACGATATCATCTTTTCTCTTTCCCTGATTCTTAACCTCAACAACCTGCCTTGTGCGACCTCCGGCTCCGAAAATCTACGATAGC  
TGCTCTGCTCATTGGTCTCTATCCGCCAGATACTTCAACACCTCCACCGTTGACATTCAATCGCGTCTCCATAAGTAACTGTACATTTCCGCTC  
CTCCGGGCTTCTCTCTCACTCGTCCACAAAATACCGATTCTATTTCCAGCTACCATTCTCCATAACATCATTTATGGTCTCCCAAGATCTTCTC  
CTTGTGCTAGTCTTCCATCTGCTATTGCATCAGCAAAAGATGCTGGGATCCATGAATTTATCACATCGCTTCCACAAGGTTATGATACTATG
```

```
>Bcin05g07690 (MLST2), partial sequence [organism=Botrytis cinerea, strain D14_Kil2]  
TCACCACTATCACCAAGTCTTTTCTGCACTTTCCCTCATCAAAAACGAACGAGAACATCATCAATAAATACTTTGCTGAAGTAATTGGGTTTTTA  
TTTTGGCCAGGATGCCCTTCTCTCTACGACAGCAAGCCTTCGATGATATGTTGTGGGTAGTTCTTGGCTGGCTGGATACTGTCAAATTCATTGAT  
TTACATTCTGAATTGCACTATTCAAACGACTCTCAGCCAGAAATGGTACGGACAACAATATAAACCTGCATTTGCACATCGAGCGGACTATTTT  
GGGAATTGGCTTTCACAAGGATGGGATACTACTCTCTGTGGTGGTGGGATGATATGGTCCACCATACCTTACTCCATAACAAGAAATGCAATTACCAA  
TGAACTCTATATCGCAGCTTCGATATCGATGTACCTCTATTTCCCCGGAGATGACAATCAATCCCCATTTATGCTTTCCAACCCCTTCATATCCA  
CCTCACGATCCGAAATATCTACAGGCAGCTGTTGATGCTTACAAATGGCTGAATGGTTCCAACATGACGGATTTACAAGGATTATATGTCGACG  
GGTATCATATCTCGAATCTTCTGCGGTGAAAACACCCATTGCGATTCTAGAAAATGAGATGGTATATAACCTACAATCAAGGTGTTTTGCTTAC  
TGGACAACGTGGTGTGATGACGCAACCGCCGACGATCATACCTTGTGGATGGCCACAACTCATCGCGAATGTTATTAATGCCACAGGCTAT  
GACCTGAAACACAATGTTGCCATCTCACCGCCACCCAAAGATGGTTCGCAATGGCAAAGTGGTTTGGCCTGGGTAGGAATGGAATACCTGGAAG  
AAGGATGCGATTCAAGTGTCTCGTGTCTCAAAAATGGACAAAATTTCAAAGGCATATCTTTTACCACCTTGATTGCGTCTGTAGTATTGCTG  
AGGGGAGCCTATTGCAAGGACGAAGGAAGGCTAGAACTCGACAGAGTGTGGCATTCTGACAAAATGCTCACAGTATACAAAATG
```

```
>Bcin06g01710 (MLST3), partial sequence [organism=Botrytis cinerea, strain D14_Kil2]  
GTGAGTCTGACTTTTGTATTTGAGCGTTAAGATGGACACTGATGTACCAAGGCAATCACCTAATTTTCATGGCGTCTTCCCTGCATCATCTACC  
TACCCTGGAATGCTGGGAGAATTAATACTCAGCAGCTTTTCACAGCTCCTGCTTTCAATTTGGATCTGTTCCCTGCTGTGACAGAATTTGGAGACGG  
TTGTAATGGATTGGTTGGCCAAGCTTCTCAATCTCCAGACTGTTATTTGTCGTCGACTCATGGTGGTGGTGTATCCAAGGATCAGCCTCGGA  
AGCTATCGTTACCGTTATGGTTGCTGCCCGGATAAGTATCTTCGTGAAACCACTGAAGTCTGTCGGGAATTGAACTCGAGGATGCGATTGCA  
TATAAGAGGAGTAAGCTAGTTGCACTAGGAAGCGAAATGGCACACAGCTCCACGCGAAAAGCAGCGCAGATAGCTGGCGTTAGATTCCGATCGA  
TTCCAGTACTCGCATCCAATGATTTTCGCCATGACGGGTGATGATTTAGAGAAGGTATTGAAAAGATGCAAACTCAAGGATTTGGAACCCCTCTA  
TCTAACTTCGACGTTGGGAACAACATCTACATGCGCAGTTGACGACTTCGCATCTATTGCAACAGTACTTTCAAAAATATGCACCTCCAGATGTT  
GCAGGCGAGATCTGGGTTACGTCGATGCTGCTTATGCAGGTGCAGCTTTGGTTTGGCCTGAATACCATCATCTAACATCGTCTTCCAGCATT  
TCCATTCTTTGATATGAACATGCACAAAATGGCTTCTGACAAAATTTGACGCTTCTTGGCTATATGTCAAGAAAACGCAAAAGATCTGATCGATGC  
ACTCTCCATAACACCAAGTTATCTTCGCAACGAGTTTTCAGAGAGTAGACTCGTAACCGACTATCGGGACTGGCAAATTCCTCTCGGAAGACGT  
TTCCGAAGCTTAAAGATTTGGTTTGTCTCAGAACCCTACGG
```

>Bcin09g03030 (MLST4), partial sequence [organism=Botrytis cinerea, strain D14\_Kil2]  
GACCCCTCAACCCACCGCAGCTCCTATACCGAAAGCGAGTATCCTACCAATTCTCCTTCCACCTGCGACTTTAAGACCATTGGCTTTTCGCAC  
TTTCACAAAAAGCATAGTTTAAACATTGACGTCGTCGGCATTACAAGTGTGGCTACTTTTATTGGAAAGCATTGTGGGACAGGATGGAGGGAG  
GAAGGACTGGCAGAGAGAGTCTTGGAGGAGGTCGCCAAGAGTTGGAAGAAATAGGAGTGGCGGTGTCAATTGTCGAGGGCGAGGGAACGGAATTGA  
AGGAGATTCTGAAAAGCTTTGGAAGGGAATATGAGTGGTGAAGGATAGTCAATAGGAAGAGAGCTAAGCCGGCAGAAATAGTTTAGTACTGGGATC  
ATCACAATATGGAGAGGTCAATCATAACAAGACTTGGGCTACGGCCAGGGAATATACCCAGAGAGGATAGTCAAGTTTGGGAATGTCAACG  
TTGGAGGTCAATGACGAGGAAGATGAGGATGGCTGATGGATCCAAGAAGGTGGTTAAAAGTCTGTTGATGCATTTGAGCAACCTCGACTGGTGT  
ACAATGTTGCTAAAAAGCACTTTGATAGGTATGTTTCAATGATAAAATTTTATCTGAATCGACTAACTCAGTACAGAGATACCTCCAAACCTTC  
ATTGTTCCACCTGCGTCTCATAAAACACTCCTCTTCCAAAACCGCTATAATGTTATCCATCAACGTCTCCTTCGCAATGAATCTTTTCAAACG  
CCCGCTTTTCAAGGTGGCAAATCTTCCCTTCAACGCAGCAGTCCGCCATTACCACCCAACAACAATCATACAAATTAACGCCGATAGCTAATC  
TTCTCGGTTCGCAATCGCAGCTCTCATATGCTTCTCGGTCTCCTCAGTATTTACCCACTGGTACCCTCGCCATCAATGACCTGACGGGCAGTAT  
CGCTCTTGATCTTACACACGCAGCAGCCATTC

>Bcin11g01310 (MLST5), partial sequence [organism=Botrytis cinerea, strain D14\_Kil2]  
ACTGACATGGACCTCATGTGGAACCGGCGTAGAATGCGCAACGCTTGAAGTTCGCTCGAATATGGCGATGCAACGTCAACGGCAAAGCCAGT  
GTTGCGCTTGCTCGTTATCCTGCCACTGTTGCCGCGAGCAAGAAGCTCGGGTCTCTCTTGATAAAATCCCGGTGGACCCGGTGCCTCTGGTGTG  
GCTTTGTGAGTCTGGAGCCGGTGCCCGCTCTCGACACTGAGTGGTGGATTATACGATATCATCGGATGGGATCCACGTGGAACCGGTGCTTC  
GGCTCCTATTTTGGAAATGTTTGGCAAATGCCAGTGGGAGTATGATTTTAAACAACGCGTTTCCATCTGCTCCGAATCTCTGGCTCGGACAATTT  
GCGAATGCCAGCGCAAATTTCTGCTGTTAGCTCTGCTATCACATCCTTTGACACTTCTGTCTGCTGCTTGGCAAAGCTTGGCTGGCTCAGAAAT  
CTCCCGCTCTTTACACCTCAACAGCAGCATATGTTGCTCGAGACATGGCAGCGATAGTGCATGCAATGGATGGGACCTCTGAAAACCTTAACCTA  
CTGGGGTTTCTCATATGGAACATCTTCTTAGCTGAGTTTATCCAACTTTCCAGCCGCGTGGGAAGAGTTCTTGGCGATGGTGTTCGAC  
GCAAAGGCAAATGCACTCACATACGTTAGCCAACTTCCCAACGATCAACTCAGTGTTCGTGCTTGGTTGAACGATTTTGCAGCTTTCTGCACCA  
CCGCCGGTAGTAAAGTTGCTCTTTTGGCCACCGCCCTACTGGAACCTCAGGTACTGTTGCTACCAGACTGGACAACATAATGAAGGATATGTT  
CCTCAATCCTATTGTTGCTTCGGGCTTGAGCATCA

>Bcin15g03910 (MLST6), partial sequence [organism=Botrytis cinerea, strain D14\_Kil2]  
GCCAAAACACAAAATCATCCAACGATGAAGATGATACTCCACTTCCCTTGATTATCTGGCATGGACTCGGCGATAATTACAAAGCGGATGGTCT  
TGCGCAAGTTGGAAAAGTAGCTGAAGCTATTCATCCTGGGACTTTTGTCTATAAATTTTATGATGAGGATGCATCTGCAGATAGGACAGCT  
ACCTTCTTTGGAAATCTCACTCGTGAAGTACATCCCTATTTTTCCTTTAAATACCATACTAACTCTCTTACCAAGTTCAAATCGAAAAGGTCTG  
CGAAGACCTCGCCTCCCATCCTATTCTCTCTACCAGCGCCCGCGTGCAGCAATTTGGATTCTCCCAAGGCGGCCAATTTCTTGGCGGTTACATA  
TCCCCTGCAATGCTCCACCCATCCGCTCTCTCTGACCTTCGGTTCCCAACACAACGGCATTCTGCTTCCAAGCCTGTGGTCCCTGCCGATT  
TCCTCTGTGCGGGTGTCAAACCTTTTGGCATCAAACCTGGTCAACCTTTGTCCAATCTCGTCTCGTACCTGCTCAATACTTCCAGAGATCC  
GGAAAACCTAGACTCTTACCTTGAATATTTCAAATTTCTTGGCGACATCAATAATGAGCGGTTCTCAAGAACCACAAATATAAAATCCAACATG  
GAAAAATTGGAACGATTTCGTAATGTATGCTTTGAAAGACGATACAACCTGTATCCCTAAGGAAAGTGGATGGTGGGCTGAAGTCAATGGCACGG  
AAGTTACACCACTGAAAGAAAGAGCCATTTATAAAGAAAGATTGGCTAGGGTTAAAGACATTTGGATGAGGCCGAAAATTAGTTTTCGAAACCAT  
TCCAGGGGGACATATGACGTTAGGAGAGGAGATGCTAGAGAAGGCTTTCAAAGAGTACTTTGGTCCAGCAGGGAAAAAATTTGGG

>Bcin16g03460 (MLST7), partial sequence [organism=Botrytis cinerea, strain D14\_Kil2]  
ATGAACCTCTTAATTTGAACTCTTCATTAATTTGCAAATGATGAACCCCTATTCTGCCAGAGGATAGTTACAAGACGTATATCATTAGTCGAGA  
ACCACCTCATGATATACATTGACGGATTTTGGAAAAGCAATGAAAAGTAAACACTTGGTTGATGTTAGGTGTGTTATTTATTTCTGATGAAATGAAC  
AAGAGAGACTGATGAGATAGTGAACCCGCTTTATGAACCGTCTACTGTTTCTCACGGACAGGAAGTTACCATTGATCCTTCGGTTCGAAATTTCTG  
AAGTGGCGATTTTAGAGAGGGATGAGGTGGTCAAGTGTATTGAGCATAGAGCGAGGGCATTTCAGGGGTGGAGGGGCGAGATGGGGATTGAGAA  
GTTGAGGACGCAGAGGTATGGGGTTGGAGGACATTTAGGGATGCATTTGTAAGTTTGGGGGATTGACGAAGGCTTCTGTCTATTTTCTATCAG  
TGCGGATCTTGAAGAAAAGATAGCATGAACACGAGGGCTAATAACTAGGAAAATAGCGATTGGAGCGGAGGTAACGTTGGCATAGACCGATTTAG  
TACTTTTCATGGTCTATGTCGACGTATCCTCTGATATCGAAGGTGGAGGAACGGAATTTCCACGTATTTGTGGACCAAAAAGGAGGAAGGTGGGAG  
GACTTCTTGGAAACTACGGAAGCATTTGGATCCAAGAAGTGGAGAAAATGTAACAGTAGAAGGGGTGACATTTCAAACCAATCAAGGGAAATGCCG  
TATTCTGGGAAAATACTGACAACAACGGGAGGGGCTATGAT

>Bcin12g03020 (MLST8), partial sequence [organism=Botrytis cinerea, strain D14\_Kil2]  
CGATTGGCTGCGAAGAAAAGTGCAGCACCAGTACCCAAAAGCAGCAATAAACCATCGGCAAGGAAAATATTCTCTGAACCACAACATGACA  
CGAGCGCGGAAGAGTATATCGGGCGAGAAGCTTCATCAAGAGCACCAAAGCGACAACGAGTCGATGATAAATTATAACTCTTACGGTGGAAAGAAA  
TGAGAATACAGCAGCTTATGCTTCCGGGAAAAGTCCATCTGGAAGTATAAATGTTGGTGGAGGTAGGAAGACCACATTTCAAGAAGAACCCTCGA  
ACGGCATTGTGCTGGCAAGTTGCCCTTGAAGTATCAACATTTGGTGGAAAGAAGGCTACCCAAAATCGAGGACGAGGGTAGAGCAGCTTATG  
CTTCCGAAAATTTGCCCCAGGAAGTATAAACTCTGGCGCAAAGAAGGCGATTTCAATCCAAGATGAAACGAGACCGGCTTATGCTCTGGAAA  
GCTTCCACATGGTAGTATCGACGGTATGCGAAAACCGTGAATGGCTGCCGTCCACCGCGAAAATTTGCTGAGGGTGGGAGGAAACCAGGCCAGGTT  
GTCTCTTCTCTATTTCACATTTCAATCCTACTTCAAAGAAAACCTTTTCGATGAACCCGAAGAACAAGCGGAACCGGCAAACCATCCAATGCACCTT  
TGACAGAGGAAAATGGCGACTTTACCAATCTAGGGTTATCGAGAAGGCTTGCAGCCATCTATCGACTAACTCGATATGAAAGCCCCGACCGC

CATTCAAAAAGCATCTGTGCAGCAGTTGGTATCGGACGATAGCGATGCTTTCATACAAGCAGAGACTGGATCTGGAAAACTTTGGCATATCTA  
CTACCTATAGTCGAGCGAATATTAGCATTGAGTGAGAATGGCGTACAAA

>Bcin02g07770 (MLST9), partial sequence [organism=Botrytis cinerea, strain D14\_Kil2]

CAGCTTTCCCTTTTCGGTCTTGGCATCTACAGTCATTGCCATCCCTACACCATCACAACCTTGAGTCTCGGGCCGTTATCGATTCCGATGCCGTTG  
TAGGATTTGCCGAAACTGTTCCAGTGGGACCGTAGGAACAGTTTACGAGGCATATAAACCATTTCTTAAAGTCGTAAATGGATGCGTACCATT  
CCCTGCCGTCGATGCATCGGGTAACACAGGGTATGTCTTATAACCATTCTCTTCCACACGATTGCTATTGAGTCTCTAACATATTTTAGTGGTG  
GTTTGTCAACCAACTGGCAGTAGCAATGGTGGTTGCAGCAGCAGTACCGGTCAAGTATATGTTTCGAGGAGGACAAAGCGGATCAAACCTACGCCAT  
CATGTACTCCTGGTAAGTTCTCTCTAAACTTCTCCTTATAGATCCAACCTAACAAAATCTTAGGTACATGCCAAAGGACGAGCCCTCAACCGGT  
ATTGGTCAACGTCACGATTGGGAAGGTGTAATTGTCTGGCTCTCAAGCGCCACCGCCACAACCTGCCGACAACATCTTAGCCGTTTGTCTTCCG  
CCCACGGAGGCTGGGATTGTTCCACCGATGGCTATTCCCTTTCTGGTACCAGCCCTCTTATCAAGTACGAAAGTATCTGGCCCGTCGATCATTC  
AATGGGTCTTACTAGTACTGTTGGTGGAAAAACAACCTATGATTGCTTGGGAGTCTTTACCAACTGCTGCTCAAACCTGCTCTTGAGAACACCGAT  
TTCGGTCTGCGAATGTTCCATTCAATCCGGCTGTTTTACAGATAATCT

>Bcin04g02090 (MLST10), partial sequence [organism=Botrytis cinerea, strain D14\_Kil2]

GCGGAGGATGATATGGCAAAGTCTATGATTACCAAAGCATTTGTAGGCATGAGTAGTAACTGTGCAATATGACTATGAATGATGTTTACAAGC  
CCTACATCCATGTAAGAAATGTAGAATAGAGAGATCAGTAACTGGAACATAATATCGTTTGCAGGCTTTCAAGTTACTTACGCAGTTCAACCCAA  
TCACTACAGCTATTGCCGAATCCCCACTATTTCAAATGGCTGTCTCAGCAAAATACCATCGAAAAGTACACACTGCTAGGCCCTTTCTTTCAGAAT  
ATCTCCTCTGCAACAGGAAGTTACCAGGGAATACTTCACTGCGCCAAAGACGATAGATAGGCGACACATTGCCACATCTCAAGATGCCTTACGA  
TTGACCTTACAAAACCCATCAAGAAGATTTACTTGTATATCATCAACCCTTTGTTTCGAGCAAGTCCAATCGCCAAAAGCAAACCCCTGGATTGGT  
TCGCCTACATTGTGAATCAAAATCACAAGCGTCGAGCACTTTCAGGTAGACCCGAAAGAAGTGTCTTCTGATGGTTTTATGCACAATGTCACCTGT  
CGTTCTAGATGGTCTTTGTGAGCCATTTCATGGATACCACATTCTCAAAAATTTTCGAAGATTGATATTGATTATCTAAGACGTGCACCTCGTGTA  
GATATCAAGGACGAGACCAAGTTGAACGCTGATGAGAAGGCTTCTGAGAAGTATTATGAGGACACTGTTCTTGGCCTTCTAATTTTCATCTCTG  
AGGTCTTCTTCTGACATTGGCTGCTCATATTATGGTAGTGAAGCTCTTAATGCCACGCATAAGAGTCTGGAGAAAGACATCAAATATATTTCA  
AAAGCAATTGACTGCCGTTGAAGCA

>Bcin01g07220 (MLST1), partial sequence [organism=Botrytis cinerea, strain G09\_S04]

ATGGCATATCTTGTCTTTTCGCATTTATGCTTTGGAACGTGCTGGACAAGCTTGGGTTAGTGTCTGCGTGTAGAAGCACTAAAGAAGATTC  
TCGCACAACCGAAGTCATGGTTTGGAGGAATCCAGGAATTCACCTGGCCGGTTGAACGAAGTTTTGGATAGGAACCTGAGGAAATGCGTAATCT  
CGTTGGCCGCTTTGCTGGTATTGTATTACAGCATTTTTATGCTATTGATATCAATCATTGGGCTTTTCTGTAATACATGGAAACTGACATTAG  
TCTCGATGGTAACTGGGCCAGTTATATACGCTGTACCAAAACGTTCAATCGCGTGAGTGGAAAATGGGAAAACAAGTGCAACTACGCCTCTGA  
AATGACCACTGGCATATTTTCAGAGACTTCTCCAACATCAAAGTGGTTTCGGGCTTTTACTCTGGAACTTACTTTGAGACAAAACACACCCAAA  
GCTACAGAAGAACTTTATAAAGTTGGACTAATACGAGCAAACTACTCGGGATTGCTGTGGGGATTGACAGATGCGATGTCATTTCTATCACTG  
CAACTATCTTTTATTATGCCACGGTCTCATTACCAAGAGAGAGATCAGTATCGCGACTGCACTACAGACTGTCAATCTTCTATTATTTGGTAT  
TTCTAATAGTACGAATATGCTGGCCATGATACCACAAAATCAACTCTTCTCGGTTACAGCTACGCATATGCTTGCATTAGCCAATCTCGATTCA  
TCTTCTCCCACGAAAATAAAGGAACCGAACGGCTTTTCGACAATCTTTCCAATCAAAAATTCACCGTCTCTCATTCACATATCCTACTCGTCT  
GAAAAACGAACGATATCATCCTTTTCTCTTTCCCTGATTCCCTAACTCAACAACCTGCACTTGTTCGGACCCCTCCGCTCCGAAAATCTACAATAGC  
TGCTCTGCTCATTGGTCTCTATCCGCCAGATACTTCAACACCTCCACCGTTGACATTCATCGCGTCTCCATAAGTAACGTGCACATTCCGCTCT  
CTCCGGGCTTTCTCTCTCACTCGTTCACAAAATACCGATTCTATTTCCAGCTACCATTTCTCCATAACATCATTTATGGTCTCCCAGAATCTTCT  
CCTTGTGCTAGTCTTCCATCAGCTATTGCATCAGCAAAAAGATGCTGGGATCCATGAATTTATCACATCGCTTCCACAAGGTTATGATACTAT

>Bcin05g07690 (MLST2), partial sequence [organism=Botrytis cinerea, strain G09\_S04]

ACCACTATACCAAGTCTTTTCTGCACTTTCTCATCAAAAACGAACGAGAACATCATCAATAAATACTTTGCTGAAGTAATGGGTTTTATT  
TTGGCCAGGATGCCCTTCTCTCTACGACAGCAAGCCTTCGATGATATGTTGTGGGTAGTCTTGGCTGGCTGGATACTGTCAAATTCATTGATTT  
ACATTCTGAATTGCACTATTCAAACGACTCTCAGCCAGAATGGTACGGACAACAATATAAACCTGCATTTGCACATCGAGCGCGACTATTTTGG  
GAATTGGCTTCACAAGGATGGGATACTACTCTCTGTGGTGGTGGGATGATATGGTACCATACCTTACTCCATAACAAGAACGCAATTACCAATG  
AACTCTATATCGCAGCTTCGATATCGATGTACCTATATTTCCCCGGAGATGACAATCAATCCCCATTTATGCTTTCCAACCCCTCATATCCACC  
TCACGATCCGAAATATCTACAGGCAGCTGTTGATGCTTACAAATGGCTGAATGGTTCCAACATGACGGATTTACAAGGATTATATGTCGACGGG  
TACCATATCTCGAATCTTTCTGGCGGTGAAAACACCCATTGCGATTCTAGAAATGAGATGGTATATACTTACAATCAAGGTGTTTTGCTTACTG  
GACAACGTGGTTTGTATGACGCAACCGCCGACGATCATACCTTGTAGATGGCCACAAACTCATCGGAATGTTATTAATGCCACAGGCTATGA  
CCTGAAAACACAATGTTGTCTCTCACCGCCACCCAAAAGATGGTTCCGCATTGGCAAAGTGGTTTTGGCTGGGTAGGAATGGAATACGGAAGAA  
GGATGCGATTCAAGTCTTCTGTTCTCAAAAATGGACAACTTTCAAAGGCATATTTCTTTCATCACTTGATTGCGTCTGTAGTATTGTCAG  
GGGAGCCTATTGCAGGGACGAAGGAAAGCTTAGAACTCGACAGAGTGTGGCATTCTGACAAAATGCTCACAGTATACAAAAT

>Bcin06g01710 (MLST3), partial sequence [organism=Botrytis cinerea, strain G09\_S04]

GTGAGTCTGACTTTTGTATTTGAGCGTTAAGATAGACACTGATATACCAAGGCAATCACCTAATTTTCATGGCGTCTTCCCTGCATCATCTACC  
TACCCTGGAATGCTGGGAGAATTATACTCAGCAGCTTTACAGCTCCTGCTTTCAATGGATCTGTTCCCTGCTGTGACAGAATGGAGACGG

TTGTAATGGATTGGCTGGCCAAGCTTCTCAATCTCCAGACTGTTATTTGTCTTCGACTCATGGTGGTGGTGTATCCAAGGATCAGCCTCGGA  
AGCTATCGTTACCGTTATGGTTGCTGCCCGGATAAAATATCTTCGTGAAACCACTGAAGGTCTGTCGGGCATTGAACTCGAGGATGCGATTGCA  
TATAAGAGGAGTAAGCTAGTTGCACTAGGAAGCGAAATGGCACACAGCTCCACGCAAAAAGCAGCGCAGATAGCTGGCGTTAGATTCCGATCGA  
TTCCAGTACTCGCATCCAATGATTTTCGCCATGACGGGTGATGATTTAGAGAAGGTATTGAAAAGATGCAAATCTCAAGGATTGGAACCCCTCTA  
TCTAACTTCGACTTTGGGAACAACATCTACATGCGCAGTTGACGACTTCGCATCTATTGCAACAGTACTTTCAAATATGCACCTCCAGATGTT  
GCAGGCGAGATCTGGGTTACGTCGATGCTGCTTATGCAGGTGCAGCTTTGGTTTGCCTGAATACCATCATCTAACATCGTCTTCCAGCATT  
TCCATTCTTCGATATGAACATGCACAAATGGCTTCTGACAAATTTTCGACGCTTCTTGTCTATATGTCAAGAAAACGCAAAGATCTGATCGATGC  
ACTCTCCATAACACCAAGTTATCTTCGCAACGAGTTTTTCAGAGAGTGGACTCGTAACCGACTATCGGGACTGGCAAATTCCTCTCGGAAGACGC  
TTCCGAAGCTTAAAGATTTGGTTTGTCTCAGAACCCTAC

>Bcin09g03030 (MLST4), partial sequence [organism=Botrytis cinerea, strain G09\_S04]

GACCTTCAACCCACCGCAGCTCCTATACGAAAAGCGAGTATCCTACCAATTCCTTCCACCTGCGACTTTAAGACCATTGGCTTTCCGCACCTT  
CACAAAGAAGCATAGTTTAAACATTGACGTCGTCGGCATTACAAGTGTGGCTACTTTTTATTGGAAAGCATTGTGGACAGGATGGAGGGAAGAAG  
GACTGGCAGAGAGAGTCTTGAGAGGAGTTCGCCAAGAGTTGGAAGAATAGGAGTGGCGGTGTCATTGTGCGAGGGCGAGGGAACGGAATTGAAGGA  
GATTCTGAAAAGCTTTGGAAGGGAATATGAGTGGTGGAAAGGATAGTCATAGGAAGAGAGCTAAGCCGGCAGAATAGTTTAGTACTGGGATCATCA  
CAATATGGAGAGGTCAATCATAACAAGACTTGGGCTACGGCCAGGGAATATACCCAGAGAGGATAGTCAGTCAAGTTTGGGAATGTCAACGTTGG  
AGGTCAATGACGAGGAAGATGAGGATGGCTGATGGATCCAAGAAGGTGGTTAAAAGTCAATTGATGCATTTGAGCAACCTCGACTGGTGTACAA  
TGTTGCTAAAAAGCACTTTGATAGGTATGTTTCAATGATAGGATTTTATCTGAATCGACTAACTCAGTACAGAGATACCTCCAAACCTTCATTG  
TTCCACCTGCGTCTCATAAAAACACTCCTCTTCCAAAACCGCTATAATGTTATCCATCAACGTCTCCTTCGCAATGAATCTTTTCAAACGCCCG  
CTTTTCAAGGTGGCAAATCTTCCCTTCAACGCAGCAGTCCGCCATTACCACCCAACAACAATCATACAAATTAACGCCGATAGCTAATCTTCT  
CGGTGCAATCGCAGCTCTCATATGCTTCTCGGTCTCCTCAGTATTTTACCACCTGGTACCCTCGCCATCAATGACCTGACGGGCAGTATCGCT  
CTCGATCTTACACACGCAGCAGCCATTCC

>Bcin11g01310 (MLST5), partial sequence [organism=Botrytis cinerea, strain G09\_S04]

ACTGACATGGACCTCATGTGGAACCGGCTAGAAATGCGCAACGCTTGAAGTTCCGCTCGAATATGGCGATGCAACGTCAACGGCAAAGCCAGT  
GTTGCGCTTGCTCGTTATCCTGCCACTGTTGCCGCGAGCAAGAAGCTCGGGTCTCTCTTGATAAAACCCCGGTGGACCCGGTGCCTCTGGTGTG  
GCTTTGTGCACTCTGGAGCCGGTGCCCGCTCTCGACACTGAGTGGTGGATTGTACGATATCATCGGATGGGATCCACGTGGAACCGGTGCTTC  
GGCTCCTATTTTGGAAATGTTTTCGAAATGCCAGTGCAGGATGATTTTAAACAACGCGTTTCCATCTGCTCCGAATCTCTGGCTCGGACAATTT  
GCGAATGCCAGCGCAAATTTCTGCTGTTAGTCTGCTATCACATCCTTTGACACTTCTGTGCTGCTCTTGCAAAAAGCTTGCCTGGCTCAGAAAT  
CTCCCGCTCTTTACACCCCAACAGCAGCATATGTTGCTCGAGACATGGCAGCGATAGTTCGATGCATCGGATGGGACCTCTGCAAAAACCTTAAC  
CTGGGGTTTCTCATATGGAACATTTTTCCTAGCTGAGTTTATCCAACTTTCCAGGCCGCGTGGGAAGAGTTCTTGCCGATGGTGTTCGAC  
GCAAAGGCAAATGCACTCACATACGTTAGCCAACCTTCCCAACGATCAACTCAGTGTTCGTGCTTCGTTGAACGATTTTTCGAGCTTTCTGCACCA  
CCGCCGGTAGTAAAGGTTGCTCTTTTGCACCCGCCCTACTGGAAACCTCAGGTAAGTGTGCTACCAGACTGGACAACATAATGAAGGATATGTT  
CCTCAATCCTATTGTTGCTTCGGGCTTAAAGCATCA

>Bcin15g03910 (MLST6), partial sequence [organism=Botrytis cinerea, strain G09\_S04]

CGCAAAAACACAAAATCATCCAACGATGAAGATGATACTCCACTTCCCTTGATTATCTGGCATGGACTCGGCGATAATTACAAAGCGGATGGTC  
TTGCGCAAGTTGGAAAACCTAGCTGAAGCTATTCATCCTGGGACTTTTGTCTACAATATTCATGTAGATGAGGATGCATCTGCAGATAGGACAGC  
TACCTTCTTTGGAAATCTCACTCGTGAGTACATCCCTATTTTCCCTTTAAAATATCATACTAACTCTCTTACCAAGTTCAAATCGAAAAGGTCT  
GCGAAGACCTCGCTCCCATCTATCTCTTACCAGCGCCCGCCGTCGACGCAATTTGGATTCTCCCAAGGCGGCCAATTTCTTGCCTGGTTACAT  
ATCCCGCTGCAATGCTCCACCCATCCGCTCTCTCCTGACCTTCGGTTCCCAACACAACGGCATTCTGCTTCCAAGCCTGTGGTCTGCGCAT  
TTCTCTGTGCGGGTCTCAAACCTTTTTCGATCCAACCTTGGTCAACCTTTGTCCAATCTGCTCTCGTACCAGCTCAATACTTTCAGAGATC  
CGAAAACCTAGACTCTTACCTTGAATATTTCAAATTTCTTGGCGACATCAATAATGAGCGGTTCTCAAGAACCAAACATATAAATCCAACAT  
GGAAAAATTTGGAACGATTGTAATGTATGCTTTGAAAGACGATACAACCTGTCATCCCTAAGGAAAGTGGATGGTGGGCTGAAGTCAACGGCAGC  
GAAGTTACACCACTGAAAGAAAAGAGCCATTTATAAAGAAGATTGGTTAGGTTTAAAGACATTGGATGAGGCCGAAAATTAGTTTTCGAAACCA  
TTCCAGGGGGACATATGACGTTAGGAGAGGAGATGCTAGAGAAGGCTTTCAAAGAGTATTTTGGTCCAGCAGGGAAGAAATTTGGGGA

>Bcin16g03460 (MLST7), partial sequence [organism=Botrytis cinerea, strain G09\_S04]

ATGAACCTCTTAATTTGAACTCTTCATTAATTTGCAAGTATGAAACCCATTTCTGCCAGAGGATAGTTACAAGACGTATATCATTTAGTCGAGA  
ACCCTCATGATATATATTGACGGATTTTGGAAAGCGAATGAAAGTAAACATTTGGTTGATGTTAGGTGTGTTATTTATTTCTGATGAAATGAAC  
AAGAGAGACTGATGAGATAGTGAACCGCTTTATGAACCGTCTACTGTTTCTCACGGGCAGGAAGTTACCATTGATACTTCAGTTCGAAATTTCTG  
AAGTGGCGGTTTTAGAGAGGGATGAGGTGGTCAGGTGTATTGAGCATAGAGCGAGGGCATTTCAGGGGTGGAGGGGCGAGATGGGGATTGAGAA  
GTTGAGGACGCAGAGGTATGGGTTGGAGGACATTTATGGGATGCATTTGTAAGTTTTGGGGATTGACGAAGGCTTCTGTCTATTTTCTACCAG  
TACGGATCTTGAAGAAAAGATGGCATGAACACGAGGGCTAATAACTAGGAAAATAGCGATTGGAGCGGAGGTAACGTGGCATAGACCGATTTAG  
TACTTTTCATGGTCTATGTGACGATATCCTCTGATATCGAAGGTGGAGGAACGGAATTTCCACGTATTTGTTGGGACCAAAGGAGGAAGGTGGGAG  
GACTTCTTGGAAACTACGGAAGCATTGGATCCAAGAAGTGGAGAAAATGTAACAGTAGAAGGGGTGACATTCAAACCAATCAAGGGAAATGCCG  
TATTCTGGAAAAACTGACAACAACGGGAGGGGCTATGATGA



>Bcin12g03020 (MLST8), partial sequence [organism=Botrytis cinerea, strain G09\_S04]  
CGATTGGCTGCGAAGAAAAGTGCAGCACCAGTACACAAAAGCACGAATAAACCATCGGCAAGGGAAAATATCTCTGAACCACAACATGACA  
CGAGCGCGGAAGAGTATATCGGGCGAGAAGCTTCATCAAGAGCACCAAAGCGACAACGAGTCGATGATAATTATAACTCTTACGGTGGAAAGAAA  
TGAAAATACAGCAGCTTATGCTTCCGGGAAAAGTCCATCTGGAAGTATAAATGTTGGTGGAGGTAGGAAGACCACCTTTTCAAGAAGAACCACGA  
ACGGCATTGTGCTGCGCAAGTTGCCCTTGGAAAGTATCAACATTTGGTGGAAAGAAGGCTACCCAAATCGAGGACGAGGGTAGAGCAGCTTATG  
CTTCCGGAAAATTTGCTCCAGGAAGTATAAACTCTGGCGCAAAGAAGGCGATTTTCATTTCCAAGATGAAACGAGACCGGCTTATGTCTCCGGAAA  
GCTTCCACATGGTAGTATCGACGGTATGCGAAAACCGTGAATGGCTGCCGTCCACCAGCGAAAATGCTGAGGGTGGGAGGAAACCAGGCCAGGTT  
GTCTCTTCTCTATTACATTCATCTTCAAGAAAAGTCTTTGATGAACCCGAAGAACAAGCGGAACCGGCAAAACCATCCAATGCGCCTT  
TGACAGAGGAAAATGGCGACTTTACCAATCTAGGGTTATCGAGAAGGCTTGACGCCATCTATCGACTAAACTCGATATGAAAGCTCCGACCGC  
CATTCAAAAAGCATCTGTACAGCAGTTGGTATCGGACGATAGCGATGCTTTCATACAAGCAGAGACTGGATCTGGA AAAAAGTCTTTGGCATACTA  
CTACCTATAGTCGAGCGAATATTAGCATTGAGTGAGAATGGCGTACAAA

>Bcin02g07770 (MLST9), partial sequence [organism=Botrytis cinerea, strain G09\_S04]  
AAAAATCATTACAGCTTTCCCTTTTCGGTCTTGGCATCTACAGTCATTGCCATCCCTACACCATCACAACTTGAGTCTCGGGCCGTTATCGATTCC  
GATGCCGTTGTAGGATTTGCCGAAAAGTGTCCAGTGGGACCGTAGGAACAGTTTATGAGGCATATAAACCATTCCTTAAAGTCGTAAATGGAT  
GCGTACCATTCCCTGCCGTGATGCATCGGGTAACACAGGGTATGTCTTATAACCTTTCTCTTCCACACGATTGCTATTGAGTCTCTAACATAT  
TTTAGTGGTGGTTTGTACCAACTGGCAGTAGCAATGGTGGTTGACGACGAGTACCGGTCAAGTATATGTTTCGAGGAGGACAAAGCGGATCAA  
ACTACGCCATCATGTACTCTGGTAAGTTCTCTCTAAACTTCTCCTTATAGATCCAACCTAACAAAATCTTAGGTACATGCCAAAGGACGAGCC  
TTCAACCGGTATTGGTCAACCGTACGATTGGGAAGGTGTAATTTGTCTGGCTCTCCAGCGCCACCGCCACAACCTGCCGACAACATCTTAGCCGTT  
TGTCTTCCGCCACGGAGGCTGGGATTTGTCCACGGATGGCTATTCCCTTTCTGGTACCAGCCCTCTTATCAAGTACGAAAGTATCTGGCCCG  
TCGATCACTCAATGGGTCTTACTAGTACTGTTGGTGGAAAACAACCTATGATTGCTTGGGAGTCTTTACCAACTGCTGCTCAAACCTGCTCTTGA  
GAACACCGATTTCCGGTGTGCGAATGTTCCATTCATTCGGGCTGTTTTACAGACAATCTT

>Bcin04g02090 (MLST10), partial sequence [organism=Botrytis cinerea, strain G09\_S04]  
CGGAGGATGATATGGCAAAGTCTATGATTACCAAAGCATTTGTAGGCATGAGTAGTAAACTGTGCAATATGACTATGAATGATGTTTACAAGCC  
CTACATCCATGTAAGAAAATGTAGAATAGAGAGATCAGTAACTGGAATAATATCGTTTGTAGGCTTTCAAGTTACTTACGCAGTTCAACCCAAT  
CACTACAGCTATTGCCGAATCCCCTACTATTTCAAATGGCTGTCTCAGCAAATACCATCGAAAAGTACACACTGCTAGGCCCTTTCTTTCAGAATA  
TCTCCTCTGCAACAGGAAGTTACCAGGGAATACTTCAGTGCGCCAAAAGACGATAGATAGGCGACACATTTGCCACATCTCAAGATGCCTTACGAT  
TGACCTTACAAAACCATCAAAAAAGATTTACTTGTATATCATCAACCCTTTGTTTCGAGCAAGTCCAATCGCAAAAAGCAAAACCCCTGGATTGGTT  
CGCTACATTGTGAATCAAAAATCAAAAGCGTCGAGCACTTCAGGTAGACCCGAAAGAAGTGTCTTCTGATGGCTTTATGCACAATGTCACCTGTC  
GTTCTAGATGGTCTTTGTGAGCCATTCATGGATACCACATTTCTCGAAAATTTTCGAAGATTGATATTGATTATCTAAGACGTGCGCCTCGTGTAG  
ATATCAAGGACGAGACCAAGTTGAACGCTGACGAGAAGGCTTCTGAGAAGTATATGAGGACACTGTTCTGGCACCTTCTAATTTTCATCTCTGA  
GGTCTTCTTTCTCACATTGGCTGCTCATCATTTATGGTAGTGAAGCTCTTAATGCCACGCATAAGAGTCTGGAGAAAAGACATCAAATATATTTCAA  
AAGCAATTGACTGCCGTTGAAGCA

>Bcin01g07220 (MLST1), partial sequence [organism=Botrytis cinerea, strain G11\_MG1\_E22]  
ATGGCATATCTTGTCTTTCGCATTATGCTTTGGAACGTGCTGGACAAGCTTGGGTTAGTGTCTGCGTGTAGAAGCACTAAAGAAGATTCTC  
GCACAACCGAAGTCATGGTTTGGGAATCCAGGAATTCACCTGGCCGGTTGAACGAAGTTTTGGATAGGAACCTGAGGAAATGCGTAATCTCG  
TTGGCCGCTTTGCTGGTATTGTATTACAGCATTTTTTATGCTATTGATATCAATCATTTGGGCTTTTCGTGAATACATGGAAACTGACATTAGT  
CTCGATGGCAACTGGGCCAGTTATATACGCTGTCCAAAACGTTCAATCGCGTGTAGTGGAAAATGGGAAAACAAGTGAACCTACGCCTCTGAA  
ATGACCACTGGCATATTTTAGAGACTTTCTCCAACATCAAAGTGGTTCGGGTTTTACTCTGAAAACCTTACTTTGAGACAAAACACACCAAAGC  
TACAGAAGAACTTTATAAAGTTGGACTAATACGAGCAAACCTACTCGGGATTGCTGTGGGATTGACAGATGCGATGTCATTCTTTTATCACTGCAA  
CTATCTTTTATTATGCCACGGTTCTCATTACCAAGAGAGAGATCAGTATCGCGACTGCACTACAGACTGTCAATCTTCTATTATTTGGTATTTT  
TAATAGTACGAATATGCTGGCCATGATACCACAAAATCAACTCTTCTCGCGTTACAGCTACGCATATGCTTGCATTAGCCAATCTCGATTCTATCT  
TCCTCCACGAAAATAAAGGAACCGAACGGCTTTTCGACAATCTTTCCAATCAAATTC AACCGTCTTTTCATTACATAACCTACTCGTCTGAAA  
AACGAACGATATCATCCTTTTCTCTTTCCCTGATTTCTAACTCAACAACCTGCACCTTGTTCGGACCCCTCCGCTCCGAAAAATCTACAATAGCTGCT  
CTGCTCATTGGTCTCTATCCGCCAGATACTTCAACACCTCCACCCTTGACATTCATCGCGTCTCCATAAGTAACTGTACATTTCCGCTCTCTCC  
GGGCTTCTCTCTCACTCGTTCACAAAATACCGATTCTATTTCCAGTACCATTCTCCATAACATCATTTTATGGTCTCCGAAATCTTCTCCTTG  
TGCTAGTCTTCCATCTGCTATTGCATCAGCAAAGATGCTGGGATCCATGAATTTATCACATCGCTTCCGCAAGGTTATGATACTATG

>Bcin05g07690 (MLST2), partial sequence [organism=Botrytis cinerea, strain G11\_MG1\_E22]  
ACCACTATACCAAGTCTTTTCTGCACTTTCTCATCAAAAACGAACGAGAATCATCAATAAAACTTTGCTGAAGTAATTGGGTTTTATT  
TTGGCCAGGATGCCTTCTCTACGACAGCAAGCCTTCGATGATATGTTGTGGGTAGTTCTTGGCTGGCTGGATACTGTCAAATTCATTGATTT  
ACATTCTGAATTGCACTATTCAAACGACTCTCAGCCAGAAATGGTACGGACAACAATATAAACCTGCATTTGCACATCGAGCGGACTATTTTGG  
GAATTGGCTTCAACAAGGATGGGATACTACTCTGTGGTGGTGGGATGATATGGTACCATACCTTACTCCATAACAAGAACGCAATTACCAATG  
AACTCTATATCGAGCTTCGATATCGATGTACCTATATTTCCCGGAGATGACAATCAATCCCATTTATGCTTTCCAACCCCTTCATATCCACC

TCACAATCCGAAATATCTACAGGCAGCTGTTGATGCTTACAAATGGCTGAATGGTTCCAACATGACGGATTTACAAGGATTATATGTCGACGGG  
TACCATATCTCGAATCTTTCTGGCGGTGAAAACACCCATTGCGATTCTAGAAATGAGATGGTATATACCTACAATCAAGGTGTTTTGCTTACTG  
GACAACGTGGTTTTGTATGACGCAACCGCCGACGATCATACCTTGTAGATGGCCACAAATCATCGCGAATGTTATTAATGCCACAGGCTATGA  
CCTGAAACACAATGTTGTCTATCTACCGCCACCCAAAGATGGTTCCGCATTGGCAAAGTGGTTTGGCCCTGGGTAGGAATGGAATACTGGAAGAA  
GGATGCGATTCAAGTGCTTCGTGTTCTCAAAATGGACAAACTTTCAAAGGCATATTTCTTTCATCATTGATTGCGTTCGTAGTAGATTGCCAG  
GGGAGCCTATTGCAGGGACGAAGGAAAGCTTAGAACTCGACAGAGTGTGGCATTCTGACAAATGCTCACAGTATACAAAATG

>Bcin06g01710 (MLST3), partial sequence [organism=Botrytis cinerea, strain G11\_MG1\_E22]  
GTGAGTCTGACTTTTGTATTTGAGCGTTAAGATAGACACTGATATACCAAGGCAATCACCTAATTTTCATGGCGTTCCTCCCTGCATCATCTACC  
TACCCTGGAATGCTGGGAGAATTATACTCAGCAGCTTTTCACAGCTCCTGCTTTCAATTGGATCTGTTCCCTGCCGTGACAGAATTTGGAGACGG  
TTGTAATGGATTGGCTGGCCAAGCTTCTCAATCTCCAGACTGTTATTTGCTTCGACTCATGGTGGTGGTGTATCCAAGGATCAGCCTCGGA  
AGCTATCGTTACCGTTATGGTTGCTGCCCGGATAAAATATCTTCGTGAACTACTGAAGTCTGTGCGGCATTGAACTCGAGGATGCGATTGCA  
TATAAGAGGAGTAAGCTAGTTGCACTAGGAAGCGAAATGGCACACAGCTCCACGCAGAAAGCAGCGCAGATAGCTGGCGTTAGATTCCGATCGA  
TTCCAGTACTCGCATCCAATGATTTGCGCATGACGGGTGATGATTTAGAGAAGGTATTGGAAAGATGCAAATCTCAAGGATTGGAACCCCTTCTA  
TCTAACTTCGACTTTGGGAACAACATCTACATGCGCAGTTGACGACTTCGCATCTATTGCAACAGTACTTTCAAATATGCACCTCCAGATGTT  
GCAGGCGAGATCTGGGTTACGTCGATGCTGCTTATGCAGGTGCAGCTTTGGTTTGCCCTGAATACCATCATCTAACATCGTCCCTCCAGCATT  
TCCATTCCCTCGATATGAACATGCACAAATGGCTTCTGACAAATTTGACGCTTCTTGTCTATATGTCAGAAACGCAAAGATCTGATCGATGC  
ACTCTCCATAACACCAAGTTATCTTCGCAACGAGTTTTCAGAGAGTGGACTCGTAACCGACTATCGGGACTGGCAAATTCCTCTCGGAAGACGC  
TTCCGAAGCTTAAAGATTTGGTTTTGTCTCAGAACCCTAC

>Bcin09g03030 (MLST4), partial sequence [organism=Botrytis cinerea, strain G11\_MG1\_E22]  
GACCCTTCAACCCACCGCAGCTCCTATACCGAAAGCGAGTATCCTACCAATTTCTCCTTCCACCTGCGACTTTAAGACCATTGGCTTTCCGCAC  
TTTCACAAAAAGCATAGTTAACATTGACGTCGTCGGCATTACAAGTGTGGCTACTTTTATTGGAAAGCATTGTGGGACAGGATGGAGGGAA  
GAAGGACTGGCAGAGAGAGTCTTGAGGAGGTCGCCAAGAGTTGGAAGAAATAGGAGTGGCGGTGTCATTGTCGAGGGCGAGGAAACGGAATTGA  
AGGAGATTCTGAAAGCTTTGGAAGGGAATATGAGTGGTGGAAAGGATAGTCATAGGAAGAGAGCTAAGCCGGCAGAATAGTTTAGTACTGGGATC  
ATCACAATATGGAGAGGTCAATCATACAAGACTTTGGGCTACGGCCAGGGAATATACCCAGAGAGGATAGTCAGTCAAGTTTGGGAATGTCAACG  
TTGGAGGTCAATGACGAGGAAGATGAGGATGGCTGATGGATCCAAGAAGTGGTTAAAAGTCAATGATGCATTTGAGCAACCTCGACTGGTGT  
ACAATGTTGCTAAAAAGCACTTTGATAGGTATGTTTCAATGATAAAATTTTATCTGAATCGACTAACTCAGTACAGAGATACCTCCAAACCTTC  
ATTGTTCCACCTGCGTCTCATAAAAACACTCCTCTTCCAAAACCGCTATAATGTTATCCATCAACGTCCTCTTCGCAATGAATCTTTTCAAACG  
CCCGCTTTTCAAAGTGGCAAATCTTCCCTTCAACGCAGCAGTCCGCCATTACCACCCAACAACAATCATACAATTAACGCCGATAGCTAATC  
TTCTCGGTCGCAATCGCAGCTCTCATATGCTTCTCGGTCTCCTCAGTATTCACCCACTGGTACCCTCGCCATCAATGACCTGACGGGCAGTATC  
GCTCTCGATCTTACACACGCAGCAGCCATTC

>Bcin11g01310 (MLST5), partial sequence [organism=Botrytis cinerea, strain G11\_MG1\_E22]  
GCTGACATGGACCTCATGTGAAACCGCGTAGAATGCGCAACGCTTGAAGTCCGCTCGAATATGGCGATGCAACGTCAACGGCAAAGCCAGT  
GTTGCGCTTGCTCGTTATCTGCCACTGTTGCCGCGAGCAAGAAGCTCGGGTCTCTCTTGATAAAATCCCGGTGGACCCGGTGCCCTCGGTGTTG  
GCTTTGTGCACTGAGAGCCGGTGCCCGCTCTCGACACTGAGTGGTGGATTGTACGATATCATCGGATGGGATCCACGTGGAACCGGTGCTTC  
GGCTCCTATTTTGAATGTTTTGCAAATGCCAGTGCAGGATGATTTTAAACAACGCTTTCCATCTGCTCCGAATCTCTGGCTCGGACAATTT  
GCGAATGCCAGCGCAAATTTCTGCTGTTAGCTCTGCTATCACATCCTTTGACACTTCTGTCGCTGCTCTTGCAAAAGCTTGGCTGGCTCAGAAAT  
CTCCCGCTCTTTACACCTCAACAGCAGCATATGTTGCTCGAGACATGGCAGCGATAGTCGATGCATTTGGATGGGACCTCTGCAAACTTAACTA  
CTGGGGCTTCTCATATGGAACATCTTCCCTAGCTGAGTTTATCCAACTTTCCAGGCCGCGTGGGAAGAGTCTTGGCCGATGGTGTTCGCAC  
GCAAAGGCAAATGCACTCACATACGTTAGCCAATTTCCCAACGATCAACTCAGTGTTCGTGCTTCTGTTGAACGATTTTGCAGCTTTCTGCACCA  
CCGCCGGTAGTAAAGGTTGCTCTTTTGCACC GCCCTACTGGAACCTCAGTACTGTTGCTACCAGACTGGACAACATAATGAAGGATATGTT  
CCTCAATCCTATTGTTGCTTCGGGCTTAAAGCATCA

>Bcin15g03910 (MLST6), partial sequence [organism=Botrytis cinerea, strain G11\_MG1\_E22]  
GCCAAAACACAAAATCATCCAACGATGAAGATGATACTCCACTTCCCTTGATTATCTGGCATGGACTCGGCGATAAATACAAAGCGGATGGTCT  
TGCGCAAGTTGGAAAAGTACTGAGGATTTATCCTGGGACTTTTGTCTACAATATTCATGTAGATGAGGATGCATCTGCAGATAGGACAGCT  
ACCTTCTTTGAAAATCTCACTCGTGAAGTACATCCCTATTTTTCCTTTAAATATCATACTAACTCTCTTACCAAGTTCAAATCGAAAAGGCTCTG  
CGAAGACCTCGCCTCCATCCTATTTCTCTTACC GCGCCCGCTCGACGCAATTTGGATTCTCCCAAGGCGGCAATTTCTTGGCTGGTTACATA  
TCCCCTGCAATGCTCCACCCATCCGCTCTCTCTGACCTTCGGTTCCCAACACAACGGCATTTCTGCTTCCAAAGCCTGTGGTCTGCCGATT  
TCCTCTGTGCGGGTGTCAAACCCCTTTGCGATCCAACACCTGGTCAACCTTTGTCCAATCTCGTCTCGTACCCTCAATACTTCAGAGATCC  
GGAAAACCTAGACTCTTACCTTGATATTTCAATTTCTTTGCCGACATCAATAATGAGCGGTTCTCAAGAACCAAACATATAAAATCCAACATG  
GAAAAATTTGGAACGATTCGTAATGTATGCTTTGAAAGACGATACAACCTGTCATCCCTAAGGAAAGTGGATGGTGGGCTGAAGTCAACGGCACGG  
AAGTTACACCACTGAAAAGAAAGAGCCATTTATAAAAGAAAGATTGGCTAGGTTTAAAGACATTTGGATGAGGCCGGAATAATAGTTTTCGAAACCAT  
TCCAGGGGGACATATGACGTTAGGAGAGGAGATGCTAGAGAAGGCTTTCAAAGAGTATTTTGGTCCAGCAGGGAAGAAATTTGGG

>Bcin16g03460 (MLST7), partial sequence [organism=Botrytis cinerea, strain G11\_MG1\_E22]  
ATGAACCTCTTGATTTGAACTCTTCATTAATTGCAAGTGATGAACCCCTATTCTGCCAGAGGATAGTTACAAGACGTATATCATTAGTCGAGA  
ACCACCTCATGATATATATTGACGGATTTTTGAAAAGCGAATGAAAAGTAAACATTTGGTTGATGTTAGGTGTGTTATTCATTCTGATGAAATGAAC  
AAGAGAGACTGATGAGATAGTGAACCGCTTTATGAACCATCTACTGTTTCTCACGGACAGGAAGTTACCATTGATCCTTCAGTTCGGAATTCCTG  
AAGTGGCGGTTTTAGAGAGGGATGAGGTGGTCAGGTGTATTGAGCATAGAGCGAGGGCATTTTCAGGGTGGAGGGGCGAGATGGGGATTGAGAA  
GTTGAGGACGCAGAGGTATGGGGTTGGAGGACATTATGGGATGCATTTGTAAGTTTTGGGGATTGACGAAGGCTTTTGTCTATTTTCTACCAG  
TACGGATCTTGAAAAGAAAAGATAGCATGAACACGAGGGCTAATAACTAGGAAAATAGCGATTGGAGCGGAGGTAACCTGGCATAGACCGATTTAG  
TACTTTTCATGGTCTATGTCGACGTATCCTCTGATATCGAAGGTGGAGGAACGGAATTCACCGTATCGTGGGACCAAAAGGAGGAAGGTGGGAG  
GACTTCCTGGAACTACGGAAGCATTGGATCCAAGAACTGGAGAAAATGTAACAGTAGAAGGGGTGACATTCAAACCAATCAAGGGAAATGCCG  
TATTCTGGGAAAATACTGACAACAACGGGAGGGGCTATGAT

>Bcin12g03020 (MLST8), partial sequence [organism=Botrytis cinerea, strain G11\_MG1\_E22]  
CGATTGGCTGCGAAGAAAACGCGCAGCACCAGTCACCAAAAGCAGCAATAAACCATCGGCAAGGAAAATATTCTCTGAACCACAACATGACA  
CGAGCGCGGAAGAGTATATCGGGCGAGAAGCTTCATCAAGAGCACCAAAAGCGACAACGAGTCGATGATAAATTATAACTCTTACGGTGGAAAGAAA  
TGAAAATACAGCAGCTTATGCTTCCGGGAAAACCTCCATCTGGAAGTATAAATGTTGGTGGAGGTAGGAAGACCCTTTTCAAGAAGAACCACGA  
ACGGCATTGTGCTGCAAGTTGCCCTTGAAGTATCAACATTTGGTGGAAAGAAGGCTACCCAAATCGAGGACGAGGGTAGAGCAGCTTATG  
CTTCCGAAAATTCCTCCAGGAAGTATAAACTCTGGCGCAAAGAAGGCGATTTCAATCCAAGATGGAACGAGACCGGCTTATGTCCTCCGAAA  
GCTTCCGCATGGTAGTATCGACGGTATGCGAAAACCGTGAAATGGCTGCCGTCCACCGCGAAAATTCGCTGAGGGTGGGAGGAAACCAGGCCAGGTT  
GTCTCTTCTCTATTACATTTAATCCTACTTCAAAGAAAACCTTTTGATGAACCCGAAGAACAAGCGGAACCGGCAAACCATCCAATGCGCCTT  
TGACAGAGGAAAATGGCGACTTTCACCAATCTAGGGTTATCGAGAAGGCTTGCAGCCATCTATCGACTAAACTCGGTATGAAAGCTCCGACCGC  
CATTCAAAAAGCATCTGTACAGCAGTTGGTATCGGACGATAGCGATGCTTTCATACAAGCAGAGACTGGATCTGGAAAACCTTTGGCATATCTA  
CTACCTATAGTCGAGCGAATATTAGCATTGAGTGAGAAATGGCGTACAAA

>Bcin02g07770 (MLST9), partial sequence [organism=Botrytis cinerea, strain G11\_MG1\_E22]  
CAGCTTTCCCTTTCCGGTCTTGGCATCTACAGTCATTGCCATCCCTACACCATCACAACCTTGAGTCTCGGGCCGTTATCGATTCCGATGCCGTTG  
TAGGATTTGCCGAAAACGTGCCAGTGGGACCGTAGGAACAGTTTATGAGGCATATAAACCATTCCTTAAAGTCGTAAATGGATGCGTACCATT  
CCCTGCCGTCGATGCATCGGGTAACACAGGGTATGTCTTATACCTTTCTCTTCCACACGATTGCTATTGAGTCTCTGACATATTTTAGTGGTG  
GTTTGTACCAACTGGCAGTAGCAATGGTGGTTGCAGCAGCAGTACCGGTCAAGTATATGTTTCGAGGAGGACAAAGCGGATCAAACACGCCAT  
CATGTACTCTGGTAAAGTTCTCTCTAAAACCTTCTCCTTATAGATCCAACCTAACAAAATCTTAGGTACATGCCAAAGGACGAGCCTTCAACCGGT  
ATTGGTCAACGTCACGATTGGGAAGGTGTAATTGTCTGGCTCTCCAGCGCCACCGCCACAACCTGCCGACAACATCTTAGCCGTTTGTCTTCTG  
CCCACGGAGGCTGGGATTGTTCCACCGATGGCTATTCCCTTTCTGGTACCAGCCCTTATCAAGTACGAAAAGTATCTGGCCCGTCGATCATTC  
AATGGGTCTTACTAGTACTGTTGGTGGAAACACAACCTATGATCGCTGGGAGTCTTACCTACTGCTGCTCAAACCTGCTCTTGAGAACACCGAT  
TTCGGTGTGCGAATGTTCCATTTCATTCGGCTGTTTTTCACAGATAATCT

>Bcin04g02090 (MLST10), partial sequence [organism=Botrytis cinerea, strain G11\_MG1\_E22]  
CGGAGGATGATATGGCAAAGTCTATGATTACCAAAGCATTGTAGGCATGAGTAGTAAACTGTGCAATATGACTATGAATGATGTTTACAAGCC  
CTACATCCATGTAAGAAAATGTAGAATAGAGAGATCAGTAACTGGAACATAATATCGTTTTGTAGGCTTTCAAGTTACTTACGCAGTTCAACCCAAAT  
CACTACAGCTATTGCCGAATCCCCACTGTTCAAATGGCCGTCTCAGCAAATACCATCGAAAAGTACACACTGCTAGGCCCTTTCTTTCAGAATA  
TCTCCTCTGCAACAGGAAGTTACCAGGGAATACTTCAGTGCGCCAAAGACGATAGATAGGCGACACATTGCCACATCTCAAGATGCGTTACGAT  
TGACTCTACAAAACCATCAAAAAGATTTACTTTGATATCATCAACCACTTTGTTCGAGCAAGTCCAATCGCAAAAAGCAAAAACCCCTGGATTGGTT  
CGCTACATTGTGAATCAAAAATCACAAGCGTCGAGCACTTCAGGTAGACCCGAAAGAAGTGTCTTCTGATGGCTTTATGCACAATGTCACCTGTC  
GTTCTAGATGGTCTTTGTGAGCCATTTCATGGATACCACATTTCTCGAAAATTTCAAGATTGATATTGATTATCTAAGACGTGCGCCTCGTGTAG  
ATATCAAGGACGAGACCAAGTTGAACGCTGACGAGAAGGCTTCTGAGAAGTATTATGAGGACACTGTTCTTGGCACTTCTAATTTTCATCTCTGA  
GGTCTTCTTTCTCACATTGGCTGCTCATCATTATGGTAGTGAAGCTCTTAATGCCACGCATAAGAGTCTGGAGAAAGACATCAAATATATTCAA  
AAGCAATTGACTGCCGTTGAAGCA

>Bcin01g07220 (MLST1), partial sequence [organism=Botrytis cinerea, strain G13\_EBio04]  
ATGGCATATCTTGTCTTTTTCGCATTATGCTTTGGAACGTGCTGGACAAGCTTGGTTAGTGCTCTGCGTGTAGAAGCACTAAAGAAGATTCTC  
GTACAACCGAAGTCATGGTTTGGAGGAATCCAGGAATTCACCTAGCCGTTGAAACGAAGTTTTGGATAGGAACCTGAGGAAATGCGTAATCTCG  
TTGGCCGCTTTGCTGGTATTGTATTCACAGCATTTTTTATGCTATTGATATCAATCATTTGGGCTTTCTGTAATACATGGAAACTGACATTAGT  
CTCAATGGCAACTGGGCCAGTTATATACGCTGTCCACAAAACGTTCAATCGCGTGAGTGGAAAATGGGAAAACAAGTGAACCTACGCATCTGAA  
ATGACCACTGGCATAATTTTCAGAGACTTCTCCAACATCAAAGTGGTTTCGGGCTTTTACTCTGAAAACCTACTTTAAGACAAAACACACCAAAG  
CTACAGAAGAACTCTATAAAGTTGGACTAATACGAGCAAACCTACTCGGATTGCTGTGGGATTGACAGATGCAATGTCATTTCTCATCACTGCAA  
CTATCTTTTATTATGCCACGGTTCTCATTCACCAAGAGAGAGATCAGTATCGCGGCTGCACTACAGACTGTCAATCTTCTATTATTTGGTATTTCT  
TAATAGTACGAATATGCTGGCCATGATACCACAAAATCAAACCTTCTCGCGTTACAACCTACGCATATGCTTGCATTAGCCAATCTCGATTCTATCT  
TCCTCCACGAAAATAAAGGAACCGAACGGCTTTTCGACAATCTTTCCAATCAAATTCACCGTCTTTTCAATTCACATACCCCTACTCGTCTGAAAA  
ACGAACGATATCATCTTTTCTCTTTCCCTGATTCTTAACTCAACAACGCACTTGTGCGACCTCCGGCTCCGAAAATCTACAATAGCTGCT

```
CTGCTCATTGGTCTCTATCCGCCAGATACTTCAACACCTCCACCGTTGACATTCAATCGCGCTCCATAAGTAACGTGCACATTCCGTCTCTCC
GGGCTTCTCTCTCACTCGTTCACAAAATACCGATTCTATTTCCAGCTACCATTCTCCATAACATCATTTATGGTCTCCAGAATCTTCTCCTTG
TGCTAGTCTTCCATCTGCTATTGCATCAGCAAAAAGATGCTGGATCCATGAACTTATCACATCGCTTCCACAAGGTTATGATACTAT
```

```
>Bcin05g07690 (MLST2), partial sequence [organism=Botrytis cinerea, strain G13_EBio04]
ACCACTATACCAAGTCTTTTCTGCACTTTCCTCATCAAAAACGAACGAGAACATCATCAATAAAATACTTTGCTGAAGTAATTGGGTTTTATT
TTGGCCAGGATGCCTTCTCTCTACGACAGCAAGCCTTCGATGATATGTTGTGGGTAGTTCTTGGCTGGCTGGATACTGTCAAATTCATTGATTT
ACATTCTGAATTGCACTATTCAAACGACTCTCAGCCAGAATGGTACGGACAACAATATAAACCTGCATTTGCACATCGAGCGGACTATTTTGG
GAATTGGCTTCACAAGGATGGGATACTACTCTCTGTGGTGGTGGGATGATATGGTCACCATACCTTACTCCATAACAAGAACGCAATTACCAATG
AACTCTATATCGCAGCTTCGATATCGATGTACCTATATTTCCCGGAGATGACAATCAATCCCATTTATGCTTTCCAACCCCTTCATATCCACC
TCACGATCCGAAAATATCTACAGGCAGCTGTTGATGCTTACAAATGGCTGAATGGTTCCAACATGACGGATTTACAAGGATTTATATGTCGACGGG
TACCATATCTCGAATCTTTCTGGCGGTGAAAACACCCATTGCGATTCTAGAAATGAGATGGTATATACCTACAATCAAGGTGTTTTGCTTACTG
GACAACGTGGTTTTGATGACGCAACC GCCGACGATCATACCTTGTAGATGGCCACAAACTCATCGCAATGTTATTAATGCCACAGGCTATGA
CCTGAAACACAATGTTGTCATCTCACC GCCACCCAAAAGATGGTTCCGCATTGGCAAAGTGGTTTTGGCTGGGTAGGAATGGAATACTGGAAGAA
GGATGCGATTCAAGTGCTTCGTGTTCTCAAAAATGGACAAAATTTCAAAGGCATATTTCTTTCATCACTTGATTGCGTTCTGTTGTGATTTGCCAG
GGGAGCCTATTGCAGGGACGAAGGAAAGCTTAGAACTCGACAGAGTGTGGCATTCTGACAAAATGCTCACAGTATACAAAAT
```

```
>Bcin06g01710 (MLST3), partial sequence [organism=Botrytis cinerea, strain G13_EBio04]
TTGGTGAGTCTGACTTTTTGTATTTGAGCGTTAAGATAGACACTGATATACCAAGGCAATCACCTAATTTTCATGGCGTTCTTCCCTGCATCATCT
ACCTACCCTGGAATGCTGGGAGAATTATACTCAGCAGCTTTCACAGCACCTGCTTTCAATTGGATCTGTTCCCTGCTGTGACAGAATTGGAGA
CGGTTGTAATGGATTGGCTGGCCAAGCTTCTCAATCTCCAGACTGTTATTTGTCTTCGACTCATGGTGGTGGTGTGCATCCAAGGATCAGCCTC
GGAAGCTATCGTTACCCTTATGGTTGCTGCCCCGCGATAAAATATCTTCGTGAAACTACTGAAGGTCTGTGGGCATTGAACTCGAGGATGCGATT
GCATATAAGAGGAGTAAGCTAGTTGCACTAGGAAGCGAAATGGCACACAGCTCCACGCAGAAAGCAGCGCAAATAGCTGGCGTTAGATTCCGAT
CGATTCAGTACTCGCATCCAATGATTTCCGCATGACGGGTGATGATTTAGAGAAGGTATTGAAAGAAATGCAAATCTCAAGGATTGGAACCCCTT
CTATCTAACTTCGACTTTGGGAACAACATCTACATGCGCAGTTGACGACTTCGCATCTATTGCAACAGTACTTTCAAATATGCACCTCCAGAT
GTTGACAGGCGAGATCTGGGTTACGTCGATGCTGCTTATGCAGGTGCAGCTTTGGTTTTGCCCTGAATACCATCATCTAACATCGTCTTTCCAGC
ATTTCCATTCCCTTCGATATGAACATGCACAAAATGGCTTCTGACAAAATTTGACGCTTCTTGTCTATATGTCAAGAAACGCAAAGATCTGATCGA
TGCACTGTCCATAACACCAAGTTATCTTCGCAACGAGTTTTCAGAGAGTGGACTCGTAACCGACTATCGGGACTGGCAAATTCCTCTCGGAAGA
CGCTTCCGAAGCTTAAAGATTTGGTTTTGTCTCAGAACCTAC
```

```
>Bcin09g03030 (MLST4), partial sequence [organism=Botrytis cinerea, strain G13_EBio04]
ACCCTTCAACCCACCGCAGCTCCTATACCGAAAAGCGAGTATCCTACCAATTTCTCCTTCCACCTGCGACTTTAAGACCATTGGCTTTCCGCACT
TTCACAAAAAAGCATAGTTTAAACATTGACGTCGTCGGCATTACAAGCGTTGGCTACTTTTATTTGAAAGCATTGTGGGACAGGATGGAGGGAAG
AAGGACTGGCAGAGAGAGTCTTGGAGGAGTCCGAAGAGTTGGAAGAATAGGAGTGGCGGTGTCAATGTGTCGAGGCGAGGGAACGGAATTGAAG
GAGATTCTGAAAGCTTTGGAAGGGAATATGAGTGGTGAAGGATAGTCATAGGAAGAGAGCTAAGCCGGCAGAAATAGTTTAGTACTGGGATCAT
CACAATATGGAGAGGTCAATCATACAAGACTTGGGCTACGGCCAGGGAATATACCCAGAGAGGATAGTCAGTCAAGTTTGGGAATGTCAACGTT
GGAGGTCAATGACGAGGAAGATGAGGATGGCCTGATGGATCCAAGAAGGTGGTTAAAAGTCAATGATGCATTTGAGCAACCTCGACTGGTGTAC
AATGTTGCTAAAAAGCACTTTGATAGGTATGTTTCAATGATAAAAATTTTATCTGAATCGACTAACTCAGTACAGAGATACCTCCAAACCTTCAT
TGTTCCACCTGCGTCTCATAAAAACACTCCTCTTCCAAAACCGCTATAATGTTATCCATCAGCGTCTCCTTCGCAATGAATCTTTTCAAACGCC
CGCTTTTCAAGGTGGCAAATCTTCCCTTCAACGCAGCACGTCGCCATTACCACCCAACAACAATCATACAAATTAACGCCGATAGCTAATCTT
CTCGGTGCAATCGCAGCTCTCATATGCTTCTCGGTCTCCTCAGTATTTACCCACTGGTACCCTCGCCATCAATGACCTGACGGGCAGTATCG
CTCTCGATCTTACACACGCAGCAGCCATTC
```

```
>Bcin11g01310 (MLST5), partial sequence [organism=Botrytis cinerea, strain G13_EBio04]
ACTGACATGGACCTCATGTGGAACCGGCTAGAAATGCGCAACGCTTGAAGTTCCGCTCGAATATGGCGATGCAACGTCAACGGCAAAGCCAGT
GTTGCGCTTGCTCGTTATCTGCCACTGTTGCCGCGAGCAAGAAGCTCGGGTCTCTCTTGATAAACCCCGGTGGACCCGGTGCCTCTGGTGTG
GCTTTGTGAGTCTGGAGCCGGTGCCGCCGCTCGACACTGAGTGGTGGATTGTACGATATCATCGGATGGGATCCACGTGGAACCGGTGCTTC
GGCTCCTATTTTTGGAATGTTTTGCAAATGCCAGTGGGAGTATGATTTTAAACAACGCGTTTCCATCTGCTCCGAATCTCTGGCTCGGACAATTT
GCGAATGCCAGCGCAAATTTCTGCTGTAGTCTGCTATCACATCCTTTGACACTTCTGTGCTGCTCTTGGCAAAGCTTGGCTGGCTCAGAAAT
CTCCCGCTCTTTACACCTCAACAGCAGCATATGTTGCTCGAGACATGGCAGCGATAGTCGATGCATTGGATGGGACCTCTGCAAACCTTAACCTA
CTGGGGTTTCTCATATGGAACATTTTTCTAGCTGAGTTTATCCAAAATTTCCAGGCCGCGTGGGAAGAGTTCTTGCCGATGGTGTTCGCAC
GCAAAGGCAAATGCACTCACATACGTTAGCCAACCTTCCAACGATCAACTCAGTGTTCGTGCTTGGTTGAACGATTTTGCAGCTTTCTGCACCA
CCGCCGGTAGTAAAGGTTGCTCTTTTGCACCGCCCTACTGGAACCACAGGTAAGTGTGCTACCAGACTGGACAACATAATGAAGGATATGTT
CCTCAATCCTATTGTTGCTTCGGGCTTAAGCATCA
```

```
>Bcin15g03910 (MLST6), partial sequence [organism=Botrytis cinerea, strain G13_EBio04]
GCCAAAACAAAAATCATCCAACGATGAAGATGATACTCCACTTCCCTTGATTATCTGGCATGGACTCGGCGATAATTACAAAGCGGATGGTCT
```

```
TGCGCAAGTTGGAAAAGCTAGCTGAAGCTATTCATCCTGGGACTTTTGTCTACAATATTCATGTAGATGAGGATGCATCTGCAGATAGGACAGCT
ACCTTCTTTGGAAAATCTACTCGTGAGTACATCCCCTATTTTTCCTTTAAATATCATACTAACTCTCTTACCAAGTTCAAAATCGAAAAGGCTCG
CGAAGACCTCGCCTCCCATCCTATTTCTCTTACCAGCGCCCGCGTGCAGCAATTTGGATTCTCCCAAGGCGGCCAATTTCTTGCCTGGTTACATA
TCCCCTGCAATGCTCCACCCATCCGCTCTCTCTGACCTTCGGTTCCCAACACACAGGCATTTCTGCCTTCCAAGCCTGTGGTCTGCCGATT
TCCTCTGTGCGGGTCTCAAACCTTTTGGCATCCAACACCTGGTCAACCTTTTGTCCAATCTCGTCTCGTACCCGCTCAATACTTCAGAGATCC
GGAAAACCTAGACTCTTACCTTGAATATTTCCAATTTCTTGGCGACATCAATAATGAGCGGTTCTCAAGAACCAAACATATAAATCCAACATG
GAAAAATTGGAACGATTTCGTAATGTATGTCTTTGAAAGACGATACAACCTGTCAATCCCTAAGGAAAGTGGATGGTGGGCTGAAGTCAACGGCACGG
AAGTTACACCCTGAAAAGAAAGAGCCATTTATAAAAGAGATTGGCTAGGTTTAAAGACATTTGGATGAGGCGGAAAATTTAGTTTTCGAAACCAT
TCCAGGGGACATATGACGTTAGGAGAGGAGATGCTGGAGAAGGCTTTCAAAGAGTATTTTGGTCCAGCAGGGAAGAAAATTTGGG
```

>Bcin16g03460 (MLST7), partial sequence [organism=Botrytis cinerea, strain G13\_EBio04]

```
ATGAACCTCTTGATTTGAACTCTTCATTAATTGCAAGTGTGAACCCCTATTTCTGCCAGAGGATAGTTACAAGACGTATATCATTAGTCGAGA
ACCACCTCATGATATATATTGACGGATTTTGGAAAGCGAATGAAAGTAAACATTTGGTTGATGTTAGGTGTGTTATTTATTTCTGATGAAATGAAC
AAGAGAGACTGATGAGATAGTGAGCCGCTTTATGAACCGTCAACTGTTTCTCACGGACAGGAAGTTACCATTGATCCTTCAGTTCCGGAATTTCTG
AAGTGGCGGTTTTAGAGAGGGATGAGGTGGTCAAGGTGATTTGAGCATAGAGCGAGGGCATTTTCAGGGGTGGAGGGGCGAGATGGGGATTGAGAA
GTTGAGGACGCAGAGGTATGGGGTTGGAGGACATTATGGGATGCATTTGTAAGTTTTGGGGGATTGACGAAGGCTTCTGTCTATTTTCTATCAG
CACGGATCTTGAAAGAAAGATAGCATGAACACGCGGGCTAACAACTAGGAAAATAGCGATTGGAGCGGAGGTAACCGTGGCATAGACCGATTTAG
TACTTTTCATGGTCTATGTGACGATCTCTCTGATATCGAAGGTGGAGGAACGGAATTTCCACGATATCGTGGGACCAAAGGAGGAAGGTGGGAG
GACTTCTTGAAACTACGGAAGCATTGGATCCAAGAAGCTGGAGAAAATGTAACAGTAGAAGGGGTGACATTCAAACCAATCAAGGGAAAATGCCG
TATTCTGGGAAAATACTGACAACAACGGGAGGGGCTATGAT
```

>Bcin12g03020 (MLST8), partial sequence [organism=Botrytis cinerea, strain G13\_EBio04]

```
CGATTGGCTGCGAAGAAAAGCTGCGCAGCACCGAGTCACCAAAAAGCACGAATAAACCATCGGCAAGGGAATATTTCTCTGAACCACAACATGACA
CGAGCGCGGAAGAGTATATCGGGCGAGAAGCTTCATCAAGAGCACCAAAGCGACAACGAGTCGATGATAAATTATAACTCTTACGGTGGAAAGAAA
TGAAAATACAGCAGCTTATGCTTCCGGGAAAAGCTTCATCTGGAAGTATAAATGTTGGTGGAGGTAGGAAGACCACCTTTTCAAGAAGAACCACGA
ACGGCATTGTCGCTGGCAAGTTGCCCCCTGGAAGTATCAACATTTGGTGGAAAGAAAGGCTACCCAAATCGAGGACGAGGGTAGAGCAGCTTATG
CTTCCGGAAAATGCTCCAGGAAGTATAAAGCTCTGGCGCAAAGAAGGCGATTTTCATTTCCAAGATGAAACGAGACCAGGCTTATGTCTCCGGAAA
GCTTCCACATGGTAGTATCGACGGTATGCGAAAACCGTGAATGGCTGCCGTCACCCGCGAAAATGCTGAGGGTGGGAGGAAACCAGGCCAGGTT
GTCTCTTCTCTATTTACATTTCAATCTACTTCAAAGAAAAGCTTTTGGATGAACCCGAAAGAACAAAGCGGAACCGGCAAACCATCCAATGCGCCTT
TGACAGAGGAAAATGGCGACTTTTACCAATCTAGGGTTATCGAGAAGGCTTGCAGCCCATCTATCGACTAAACTCGATATGAAAGCTCCGACCGC
CATTCAAAAAGCATCTGTACAGCAGTTGGTATCGGACGATAGCGATGCTTTTCATACAAGCAGAGACTGGATCTGGAAAAGCTTTGGCATATCTA
CTACCTATAGTCGAGCGAATATTAGCATTTGAGTGAGAATGGCGTACAAA
```

>Bcin02g07770 (MLST9), partial sequence [organism=Botrytis cinerea, strain G13\_EBio04]

```
ACAGCTTTCCCTTTCGGTCTTGGCATCTACAGTCATTGCCATCCCTACACCATCACAACCTTGAGTCTCGGGCCGTTATCGATTCCGATGCCGTT
GTAGGATTTGCCGAAAAGCTTCCAGTGGGACCGTAGGAACAGTTTATGAGGCATATAAACCATTCTTAAAGTCGTAATGGATGCGTACCAT
TCCCTGCCGTCGATGCATCGGGTAAACACAGGGTATGTCTTATACCTTTCTCTTCCACACGATTGCTATTGAGTCTCTAACATATTTTAGTGGT
GGTTTGTACCAACTGGCAGTAGCAATGGTGGTTGCAGCAGCAGTACCGTCAAGTATATGTTTCGAGGAGGACAAAGCGGATCAAACCTACGCCA
TCATGTACTCCTGGTAAAGTCTCTCTTAACTTCTCTTATAGATCCAACCTAACAAAATCTTAGGTACATGCCAAAGGACGAGCCTTCAACCGG
TATTGGTACACCGTCACGATTGGGAAGGTGTAATTTGTCTGGCTCTCCAGCGCCACCGCCACAACCTGCCGACAACATCTTAGCCGTTTGTCTTCT
GCCCACGGAGGCTGGGATTGTTCCACCGATGGCTATTTCCCTTTCTGGTACCAGCCCTCTTATCAAGTACGAAAGTATCTGGCCCGTGCATCATT
CAATGGGTCTTACTAGTACTGTTGGTGAACACAACCTATGATCGCTTGGGAGTCTTTACCTACTGCTGCTCAAACCTGCTCTTGAGAACACCGA
TTTCGGTGCTGCGAATGTTCCATTCATTTCCGGCTGTTTTACAGACAATCT
```

>Bcin04g02090 (MLST10), partial sequence [organism=Botrytis cinerea, strain G13\_EBio04]

```
CGGAGGATGATATGGCAAAGTCTATGATTACCAAAGCATTTGTAGGCATGAGTAGTAACTGTGCAATATGACTATGAATGATGTTTACAAGCC
CTACATCCATGTAAGAAAATGTAGAATAGAGAGATCAGTAACTGGAACATAATATCGTTTTGTAGGCTTTCAAGTTACTTACGCAGTTCAACCCAAT
CACTACAGCTATTGCCGAATCCCCACTATTTCAAATGGCTGTCTCAGCAAATACCATCGAAAAGTACACACTGCTAGGCCCTTTCTTCAAGAATA
TCTCCTCTGCAACAGGAAGTTACCAGGGAATACTTCAAGTGCGCCAAAGACGATAGATAGGCGACACATTTGCCACATCTCAAGATGCCCTTACGAT
TGACCTTACAAAACCATCAAAAAGATTTACTTGTATATCATCAACCACTTTGTTTCGAGCAAGTCCAATCGCCAAAAGCAAACCTTTGGATTGGTT
CGCCTACATTTGTGAATCAAAAATCACAAGCGTCGAGCACTTCAGGTAGACCCGAAAAGAGTGTCTTCTGATGGCTTTATGCACAATGTCACCTGTC
GTTCTAGATGGTCTTTGTGAGCCATTTCATGGATACCACATTTCTGAAAATTTCAAGATTGATATTGATTATCTAAGACGTGCGCCTCGTGTAG
ATATCAAGGACGAGACCAAGTTGAACGCTGACGAGAAGGCTTCTGAGAAGTATTTATGAGGACACTGTTCTTGGCACCTTCAATTTTCATCTCTGA
GGTCTTCTTTCTACATTTGGCTGCTCATTTATGGTAGTGAAGCTCTTAATGCCACGCATAAGAGTCTGGAGAAAAGACATCAAATATATTTCAA
AAGCAATTGACTGCCGTTGAAGCA
```

>Bcin01g07220 (MLST1), partial sequence [organism=Botrytis cinerea, strain N11\_K\_W02]

```
ATGGCATACTTGTCTTTTCGCATTATGCTTTGGAACGTGCTGGACAAGCTTGGGTTAGTGCTCTGCGTGTAGAAGCACTAAAGAAGATTCT
CGCACAACCGAAGTCATGGTTTGAGGAATCCAGGAATTCACCTGGCCGGTTGAACGAAGTTTTGGATAGGAACCTGAGGAAATGCGTAATCTC
GTTGGCCGCTTTGCTGGTATTTGATTTACAGCATTTTTTATGCTATTTGATATCAATCATTTGGGCTTTTCGTGAATACATGGAAACTGACATTAG
TCTCGATGGCAACTGGGCCAGTTATATACGCTGTCAACAAAACGTTCAATCGCGTGAGTGGAAAATGGGAAAACAAGTGCAACTACGCCCTCTGA
AATGACCACTGGCATAATTTTCAGAGACTTTCTCCAACATCAAAGTGGTTTCGGGCTTTTACTCTGGAAACTTACTTTGAGACAAAACACACAAA
GCTACAGAAGAACTTTATAAAGTTGGACTAATACGAGCAAACACTCTCGGATTGCTGTGGGGATTGACAGATGCGATGTCATTTCTCATCACTGC
AACTATCTTTTATTATGCCACGCTTCTCATTACCAAGAGAGAGATCAGTATCGCGACTGCACACAGACTGCCAATCTTCTATTATTTGGTATT
TCTAATAGTACGAATATGCTGGCCATGATACCACAAATCAACTCTTCTCGCGTTACAGCTACGCATATGCTTGTATTAGCCAATCTCGATTTCAT
CTTCTCCACGAAAATAAAGGAACCGAACGGCTTTGACAATCTTTCCAATCAAATTCACCGTCTCTCATTCACATATCCTACTCGTCCCTGA
AAAACGAACGATATCATCTTTCTCTTTCCCTGATTCTTAACACTCAACAACACTGCACTTGTTCGGACCCCTCCGGCTCCGGAAAATCTACAATAGCT
GCTCTGCTCATTGGTCTTTATCCGCCAGATATTTCAACACCTCCACCGTTGACATTCAAATCGCGTCTCCATAAGTAACGTGCACATTCGGTCTC
TCCGGGCTTCTCTCTCACTCGTCCACAAAATACCGATTCTATTTCCAGCTACCATTCTCCATAACATCATTTATGGTCTCCAGAACTTTCTCTCT
TGTGCTAGTCTTCCATCTGCTATTGCATCAGCAAAAGATGCTGGGATCCATGAATTTATCACATCGCTTCCACAAGGTTATGATACTATG
```

```
>Bcin05g07690 (MLST2), partial sequence [organism=Botrytis cinerea, strain N11_K_W02]
ACCACTATCACCAGTCCTTTTCTGCACTTTCCCTCATCAAAAACGAACGAGAACATCATCAATAAAACTTTGCTGAAGTAATTGGGTTTTATT
TTGGCCAGGATGCCTTCTCTACGACAGCAAGCCTTCGATGATATGTTGTGGGTAGTTCTTGGCTGGCTGGATACTGTCAAATTCATTGATTT
ACATTCTGAATTCGACTATTCAAAACGACTCTCAGCCAGAAATGGTACGGACAACAATATAAACCTGCATTTGCACATCGAGCGGACTATTTTG
GAATTGGCTTTCACAAGGATGGGATACTACTCTCTGTGGTGGTGGGATGATATGGTCACCATAACCTTACTCCATAACAAGAACGCAATTACCAATG
AACTCTATATCGCAGCTTCGATATCGATGTACCTATATTTCCCCGGAGATGACAATCAATCCCCATTTATGCTTTCCAACCCCTCATATCCACC
TCAGATCCGAAATATCTACAGGCAGCTGTTGATGCTTACAAATGGCTGAATGGTTCCAACATGACGGATTTACAAGGATTTATATGTCGACGGG
TACCATATCTCGAATCTTTCTGGCCGTGAAAACACCCATTGCGATTCTAGAAATGAGATGGTATATACCTACAATCAAGGTGTTTTGCTTACTG
GACAACGTGGTTTTGTATGACGCAACC GCCGACGATCATACCTTGTAGATGGCCACAACTCATCGCAATGTTATTAATGCCACAGGCTATGA
CCTGAAACACAATGTTGTCATCTCACCGCCACCCAAAGATGGTTCCGCATTGGCAAAGTGGTTTTGGCTGGGTAGGAATGGAATCTGGAAGAA
GGATGCGATTCAAGTGCTTCGTGTTCTCAAAATGGACAAAATTTCAAAGGCATATCTTTTCATCACTTGATTGCGTTCGTAGTGAATTTGCCAG
GGGAGCCTATTGCGAGGACGAAGGAAAAGCTTAGAACTCGACAGAGTGTGGCATTCTGACAAAATGCTCACAGTATACAAAAT
```

```
>Bcin06g01710 (MLST3), partial sequence [organism=Botrytis cinerea, strain N11_K_W02]
GTGAGTCTGACTTTTGTATTTGAGCGTTAAGATAGACGCTGATATACCAAGGCAATCACCTAATTTTCATGGCGTCTTCCCTGCATCATCTACC
TACCCTGGAATGCTGGGAGAATTATACTCAGCAGCTTTACAGCACCTGCTTTCAATTGGATCTGTTCCCTGCTGTGACAGAATTGGAGACGGT
TGTAATGGATTGGCTGGCCAAGCTTCTCAATCTCCAGACTGTTATTTGTCTTCGACTCATGGTGGTGGTGCATCCGAGGATCAGCCTCGGAA
GCTATCGTTACCGTTATGGTTGCTGCCC CGGATAAAATATCTTCGTGAAACTACTGAAGGTCTGTCCGGCATTGAACTCGAGGATGCGATTGCAT
ATAAGAGGAGTAAGCTAGTTGCACTAGGAAGCGAAAATGGCACACAGCTCCACGCAGAAAGCAGCGCAAATAGCTGGCGTTAGATTCGGATCGAT
TCCAGTACTCGCATCCAATGATTTCCGCCATGACGGGTGATGATTTAGAGGAGGTATTTGAAAGAATGCAAATCTCAAGGATTTGGAACCCCTTCTAT
CTAACTTCGACTTTGGGAACAACATCTACATGCGCAGTTGACGACTTCGCATCTATTTGCAACAGTACTTTCAAAAATATGCACCTCCAGATGTTG
CAGGCGAGATCTGGGTTACGTCGATGCTGCTTATGCAAGTGCAGCTTTGGTTTTGCCCTGAATACCATCATCTAACATCGTCTTTCCAGCATTT
CCATTCCCTTCGATATGAACATGCACAAAATGGCTTCTGACAAAATTTGACGCTTCTTGTCTATATGTCAAGAAACGCAAAGATCTGATCGATGCA
CTGTCCATAACACCAAGTTATCTTCGCAACGAGTTTTCAGAGAGTGGACTCGTAACCGACTATCGGGACTGGCAAATTCCTCTCGGAAGACGCT
TCCGAAGCTTAAAGATTTGGTCTGTCTCAGAACCTAC
```

```
>Bcin09g03030 (MLST4), partial sequence [organism=Botrytis cinerea, strain N11_K_W02]
ACCCTTCAACCCACCGCAGCTCCTATACCGAAAGCGAGTATCTTACCAATCTCCTTCCACCTGCGACTTTAAGACCATTGGCTTTCCGCACT
TTCACAAAAAAGCATAGTTTAAACATTTGACGTCGTCGGCATTACAAGTGTGGCTACTTTTTATTGGAAAGCATTGTGGGACAGGATGGAGGGAAG
AAGGACTGGCAGAGAGAGTCTTGGAGGAGGTCGCCAAGAGTTGGAAGAATAGGAGTGGCGGTGTCAATTTGTCGAGGGCGAGGGAACGGAATTTGAA
GGAGATTCTGAAAGCTTTGGAAGGGAATATGAGTGGTGGAAAGGATAGTTCATAGGAAGAGAGCTAAGCCGGCAGAATAGTTTAGTACTGGGATCA
TCACAATATGGAGAGGTCATACACAAGACTTTGGGCTACGGCCAGGGAATATACCCAGAGAGGATAGTCAAGTTCAGTCAAGTTTGGGAATGTCAACGT
TGGAGGTCAATGACGAGGAAGATGAGGATGGCCTGATGGATCCAAGAAGGTGGTTAAAAGTCATTGATGCATTTGAGCAACCTCGACTGGTGTGA
CAATGTTGCTAAAAAGCACTTTGATAGGTATGTTTCAATGATAAAAATTTTATCTGAATCGACTAACTCAGTACAGAGATACCTCCAAACCTTCA
TTGTTCCACCTGCGTCTCATAAAAACACTCCTCTTCCAAAACCGCTATAATGTTATCCATCAACGTCTCCTTTCGCAATGAATCTTTTCAAACGC
CCGCTTTTCAAAGGTGGCAAATCTTCCCTTCAACGCAGCAGCTCCGCCATTACCACCCAACAACAATCATACAAATTAACGCCGATAGCTAATCT
TCTCGGTGCGAATCGCAGCTCTCATATGCTTCTCGGTCTCCTCAGTATTTCAACCACTGGTACCCTCGCCATCAATGACCTGACGGGCAGTATC
GCTCTCGATCTTACACACGCAGCAGCCATT
```

```
>Bcin11g01310 (MLST5), partial sequence [organism=Botrytis cinerea, strain N11_K_W02]
ACTGACATGGACCTCATGTGGAACCGCGTAGAATGCGCAACGCTTGAAGTTCGGCTCGAATATGGCGATGCAACGTCAACGGCAAAGCCAGT
GTTGCGCTTGCTCGTTATCTGCCACTGTTGCCGCGAGCAAGAAGCTCGGTCTCTCTTGATAAACCCCGTGGACCCGGTGCCCTGTTGTTG
GCTTTGTGAGTCTGGAGCCGGTGCCCGCTCTGACACTGAGTGGTGGATTGTACGATATCATCGGATGGGATCCACGTGGAACCGGTGCTTC
```

```
GGCTCCTATTTTGGAAATGTTTTGCAAATGCCAGTGCAGGATGATTTTAAACAACGCGTTTCCATCTGCTCCGAATCTCTGGCTCGGACAATTT
GCGAATGCCAGCGCAAATCTGCTGTTAGCTCTGCTATCACATCCTTTGACACTTCTGTGCTGCTCTTGCAAAAAGCTTGCGTGGCTCAGAAAT
CTCCCGCTCTTTACACCTCAACAGCAGCATATGTTGCTCGAGACATGGCAGCGATAGTCGATGCATTGGATGGGACCTCTGCAAACTTAACATA
CTGGGGTTTCTCATATGGAACATCTTCCCTAGCTGAGTTTATCCAACTTTCCCAGGCCGCGTGGGAAGAGTTCTTGCCGATGGTGTTCGAC
GCAAAGGCAAATGCACTCACATACGTTAGCCAACCTTCCAACGATCAACTCAGTGTTCGTGCTTTCGTTGAACGATTTTGCAGCTTCTGCACCA
CCGCCGCTAGTAAAGGTTGCTCTTTTGCACC GCCCTACTGGAACCACAGGTAAGTGTGCTACCAGACTGGACAACATAATGAAGGATATGTT
CCTCAATCCTATTGTTGCTTCGGGCTTAAGCATCAG
```

```
>Bcin15g03910 (MLST6), partial sequence [organism=Botrytis cinerea, strain N11_K_W02]
GCCAAAACACAAAATCATCCAACGATGAAGATGATACTCCACTTCCCTTGATTATTTGGCATGGACTCGGCGATAAATTACAAAGCGGATGGTCT
TGCGCAAGTTGGAAAACCTAGCTGAAGCTATTCATCCTGGGACTTTTGTCTACAATATTCATGTAGATGAGGATGCATCTGCAGATAGGACAGCT
ACCTTCTTTGGAAAATCTCACTCGTGAGTACATCCCTATTTTCCCTTAAATACCATACTAACTCTCTTACCAAGTTCAAAATCGAAAAGGTCTG
CGAAGACCTCGCTCCATCCTATTCTCTCTACC CGCCCGCTCGACGCAATTGGATTCTCCAAGGCGCCAATTCTTGCGCGGTTACATA
TCCCCTGCAATGCTCCACCATCCGCTCTCTCTGACCTTCGGTTCCAACACAACGGCATTCTGCCTTCCAAGCCTGTGGTCTGCGGATT
TCCTCTGTGCGGGTGTCAAACCTTTTGCATCCAACACCTGGTCAACCTTTGTCCAATCTCGTCTCGTACCCGCTCAATACTTCAGAGATCC
GGAAAACCTAGACTCTTACCTTGAATATTTCAATTTCTTGGCGACATCAATAATGAGCGCGTTCTCAAGAACC AAACATATAAAATCCAACATG
GAAAAATTGGAACGATTCGTAATGTATGTCTTTGAAAGCAGATACAACCTGTCATCCCTAAGGAAAGTGGATGGTGGGCTGAAGACAACGGCACGG
AAGTTACACCACTGAAAAGAAAGAGCCATTTATAAAAGAAAGATTGGCTAGGTTTAAAGACATTTGGATGAGGCCGAAAATTAGTTTTCGAAACCAT
TCCAGGGGGACATATGACGTTAGGAGAGGAGATGCTAGAGAAGGCTTTCAAAGAGTATTTTGGTCCAGCAGGGAAGAAATTTGGG
```

```
>Bcin16g03460 (MLST7), partial sequence [organism=Botrytis cinerea, strain N11_K_W02]
ATGAACCTCTTGATTTGAACTCTTCATTAATTGCAAGTGATGAACCCCTATTCTGCCAGAGGATAGTTACAAGACGTATATCATTTAGTCGAGA
ACCCTCATGATATATATTGACGGTTTTTTGAAAAGCGAATGAAAGTAAACATTTGGTTGATGTTAGGTGTGTTATTTATTTCTGATGAAATGAAC
AAGAGAGACTGATGAGATAGTGAGCCGCTTTATGAACCGTCAACTGTTTCTCACGGACAGGAAGTTACCATTGATCCTTCAGTTCGGAATCTG
AAGTGGCGGTTTTAGAGAGGGATGAGGTGGTCAAGGTGATTTGAGCATAGAGCGAGGGCATTTCAGGGTGGAGGGGCGAGATGGGGATTGAGAA
GTTGAGGACGCAGAGGTATGGGGTTGGAGGACATTTATGGGATGCATTTGTAAGTTTTGGGGGATTGACGAAGGCTTCTGTCTATTTTCTATCAG
CACGGATCTTGAAAAGAAAGATAGCATGAACACGCGGGCTAATAACTAGGAAATAGCGATTGGAGCGGAGGTAAACGTGGCATAGACCGATTTAG
TACTTTTCTATGGTCTATGTGACGATCCTCTGATATCGAAGGTGGAGGAACGGAAATCCCACGATTTGTGGGACAAAAGGAGGAAGGTGGGAG
GACTTCTTGAAAACCTACGGAAGCATTTGGATCCAAGAACCTGGAGAAAAATGTAACAGTAGAAGGGGTGACATTCAAACCAATCAAGGGAAATGCCG
TATTCTGGGAAAATACTGACAACAACGGGAGGGGCTATGAT
```

```
>Bcin12g03020 (MLST8), partial sequence [organism=Botrytis cinerea, strain N11_K_W02]
CGATTGGCTGCGAAGAAAACCTGCGCAGCACCAGTCAACAAAAGCAGCAATAAACCATCGGCAAGGAAAATATTCTCTGAACCACAACATGACA
CGAGCGCGGAAGAGTATATCGGGCGAGAAGCTTCATCAAGAGCACCAAAGCGACAACGAGTCGATGATAAATTATAACTCTTACGGTGGAAAGAAA
TGAAAATACAGCAGCTTATGCTTCCGGGAACTTCCATCTGGAAGTATAAAATGTTGGTGGAGGTAGGAAGACCATTTTCAAGAAGAACCCTCGA
ACGGCATTGTGCTGCGCAAGTTGCCCCCTGGAAGTATCAACATTTGGTGGAAAGAAAGGCTACCCAAATCGAGGACGAGGGTAGAGCAGCTTATG
CTTCCGAAAATTTGCCCCAGGAAGTATAAACTCTGGCGCAAAGAAGGCGATTTCAATCCAAGATGAAACGAGACC GGCTTATGTCTCCGAAA
GCTTCCACATGGTAGTATCGACGGTATGCGAAAACCTGAAATGGCTGCCGTCCACCGCGAAAATGCTGAGGGTGGGAGGAAACCAGGCCAGGTT
GTCTCTTCTCTATTACATTCATCCTACTTCAAAGAAAACCTTTCGATGAACCAGAAGAACAAGCGGAACCGGCAAACCATCCAATGCGCCTT
TGACAGAGGAAAATGGCGACTTTACCAATCTAGGGCTATCGAGAAGGCTTGACAGCCATCTATCGACTAAACTCGATATGAAAGCCCCGACGGC
CATTCAAAGAGCATCTGTGCAGCAGTTGGTATCGGACGATAGCGATGCTTTCATACAAGCAGAGACTGGATCTGGA AAAACCTTTGGCATATCTA
CTACCTATAGTCGAGCGAATATTAGCATTGAGTGAGAATGGCGTACAAA
```

```
>Bcin02g07770 (MLST9), partial sequence [organism=Botrytis cinerea, strain N11_K_W02]
ACAGCTTTCCCTTTTCGGTCTTGGCATCTACAGTCATTGCCATCCCTACACCATCACAACCTTGAGTCTCGGGCCGTTATCGATTCCGATGCCGTT
GTAGGATTTGCCGAAACTGTTCCAGTGGGACCGTAGGAACAGTTTATGAGGCATATAAACCATTCCTTAAAGTCGTAATGGATGCGTACCAT
TCCCTGCCGTCGATGCATCGGGTAACACAGGGTATGTCCCTTATATCTTTCTCTTCCACACGATTGCTATTGAGTCTCTAACATATTTTAGTGGT
GGTTTGTACCAACTGGCAGTAGCAATGGTGGTTGCAGCAGCAGTACCGGTCAAGTATATGTTTCGAGGAGGACAAAGCGGATCAAACCTACGCCA
TCATGTACTCCTGGTAAGTTCTCTCTAAACTTCTCCTTATAGATCCAACCTAACAAAATCTTAGGTACATGCCAAAGGACGAGCCCTCAACCGG
TATTGGTACCGTCACGATTTGGGAAGGTGTAATTTGTCTGGCTCTCCAGCGCCACCGCCACAACCTGCCGACAACATCTTAGCCGTTTGTCTTCC
GCCACGGAGGCTGGGATTGTTCCACGGATGGCTATTTCCCTTTCTGGTACCGGCCCTCTTATCAAGTACGAAAGTATCTGGCCCGTGCATCACT
CAATGGGTCTTACTAGTACTGTTGGTGGAAAACAACCTATGATTGCTTGGGAGTCTTTACCAACTGCTGCTCAAACCTGCTCTTGAGAACACCGA
TTTCGGTGTGCGAATGTTCCATTCATTCGGGCTGTTTTACAGACAATCT
```

```
>Bcin04g02090 (MLST10), partial sequence [organism=Botrytis cinerea, strain N11_K_W02]
CGGAGGATGATATGGCAAAGTCTATGATTACCAAAGCATTTGTAGGCATGAGTAGTAAATTTGTCAAAATATGACTATGAATGATGTTTACAAGCC
CTACATTCATGTAGAAAATGTAGAATAGAGAGATCAGTAACTGGAACATAATATCGTTTGTAGGCTTTCAAGTTACTTACGCAGTTCAACCCAAT
```

CACTACAGCTATTGCCGAATCCCCACTGTTTCAAATGGCCGCTCTCAGCAAATACCATCGAAAAGTACACACTGCTAGGCCCTTTCTTCAGAATA  
TCTCCTCTGCAACAGGAAGTTACCAGGGAATACTTCAGTGCGCCAAAGACGATAGATAGGCGACACATTGCCACATCTCAAGATGCGTTACGAT  
TGACCTTACAAAACCCATCAAAAAGATTTACTTGATATCATCAACCCTTTGTTTCGAGCAAGTCCAATCGCAGAAAAGCAAAACCCCTGGATTGGTT  
CGCCTACATTGTGAATCAAAAATCACAAAGCGTCGAGCACTTCAGGTAGACCCGAAAAGAGTGTCTTCTGATGGCTTTATGCACAATGTCACCTGTC  
GTTCTAGATGGTCTTTGTGAGCCATTTCATGGATACCACATTTCTGAAAATTTGCAAGATTGACATTGATTATCTAAGACGTGCGCCTCGTGTAG  
ATATCAAGGACGAGACCAAGTTGAACGCTGACGAGAAGGCTTCTGAGAAGTATTATGAGGACACTGTTCTGGCACCTTCAATTTTCATCTCTGA  
GGTCTTCTTTCTCACATTGGCTGCTCATATTATGGTAGTGAAGCTCTTAATGCCACGCATAAGAGTCTGGAGAAAAGACATCAAATATATTTCAA  
AAGCAATTGACTGCCGTTGAAGCA

>Bcin01g07220 (MLST1), partial sequence [organism=Botrytis cinerea, strain N11\_K\_W03]  
ATGGCATATCTTGTCTTTCTTTTCGCATTATGCTTTGGAACTGCTGGACAAGCTTGGGTTAGTGTCTGCGTGTAGAAGCACTAAAGAAGATTCT  
CGCACAACCGAAGTCATGGTTTGGAGAAATCCAGGAATTCACCTGGCCGTTGAACGAAGTTTGGATAGGAACTCTGAGGAAATGCGTAATCTC  
GTTGGCCGCTTTGCTGGTATTGTATTACAGCATTTTTTATGCTATTGATATCGATCATTGGGCTTTCTGTAATACATGGAACTGACATTAG  
TCTCAATGGCAACTGGGCCAGTTATATATGCTGTACCAAAAACGTTCAATCGCGTGAGTGGAAAATGGGAAAACAAGTGAACCTACGCCCTCTGA  
AATGACCACTGGCATATTTTCAGAGACTTTCTCCAACATCAAAGTGGTTTCGGGCTTTTACTCTGGAACTTACTTTGAGACAAAACACACCAAA  
GCTACAGAAGAACTTTATAAAGTTGGATTAATACGAGCAAACACTACTCGGGATTGCTGTGGGGATTGACAGATGCGATGTCATTTCTCATCCTG  
CAACTATCTTTTATTATGCCACGGTCTCATTACCAAGAGAGAGATCAGTATCGCGACTGCACTACAGACTGTCAATCTTCTATTATTTGGTAT  
TTCTAATAGTACGAATATGCTGGCCATGATACCACAAAATCAACTCTTCTCGCGTTACAGCTACGCATATGCTTGCATTAGCCAATCTCGATTCA  
TCTTCTCCACGAAAATAAAGGAACCGAACGGCTTTTCGACAATCTTTCCAATCAAATTCACCCGTTCTCTCATTACATATCCTACTCGTCTG  
AAAAACGAACGATATCATCTTTTCTCTTTCCCTGATTCTTAACCAACTGCACTTGTGCGACCTCCGGCTCCGAAAATCTACAATAGC  
TGCTCTGCTCATTGGTCTCTATCTCCAGATACTTCAACACCTCCACCGTTGACATTCAATCGCGTCTCCATAAGTAACGTGCACATTCGGTCT  
CTCCGGGCTTCTCTCTCACTCGTCCACAAAATACCGATTCTATTTCCAGTACCATTCTCCATAACATCATTTATGGTCTCCAGAAATCTTCTC  
CTTGTGCTAGTCTTCCATCTGCTATTGCATCAGCAAAAGATGCTGGGATCCATGAATTTATCACATCGCTTCCACAAGGTTATGATACTAT

>Bcin05g07690 (MLST2), partial sequence [organism=Botrytis cinerea, strain N11\_K\_W03]  
ACCCTATCACCAAGTCCCTTTCTGCACTTTCCCTCATCAAAAACGAACGAGAACATCATCAATAAATACTTTGCTGAAGTAATTGGGTTTTATT  
TTGGCCAGGATGCCCTTCTCTCTACGACAGCAAGCCTTCGATGATATGTTGTGGGTAGTCTTGGCTGGCTGGATACTGTCAAATTCATTGATTT  
ACATTCCGAATTACACTATTCAAACGACTCTCAGCCAGAAATGGTACGGACAACAATATAAACCTGCATTTGCACATCGAGCGGACTATTTTGG  
GAATTGGCTTCAACAAGGATGGGATACTACTCTCTGTGGTGGTGGGATGATATGGTCACCATACTTACTCCATAACAAGAACGCAATTACCAATG  
AACTCTATATCGCAGCTTCGATATCAATGTACCTCTATTTCCCCGGAGATGACAATCAATCCCCATTTATGCTTTCCAACCTTTCATATCCACC  
TCACGATCCGAAATATCTACAGGCAGCTGTTGATGCTTACAAATGGCTGAATGGTTCCAACATGACGGATTTACAAGGATTATATGTCGACGGG  
TACCATATCTCGAATCTTTCTGGCGGTGAAAACACCCATTTGCATTTAGAAAATGAGATGGTATATAACCTACAATCAAGGTGTTTTGCTTACTG  
GACAACGTGGTTTTGTATGACGCAACCCGCCGACGATCATACCTTGTAGATGGCCACAAAATCATCGCGAATGTTATTAATGCCACAGGCTATGA  
CCTGAAACACAATGTTGTCATCTCACCGCCACCCAAAGATGGTTCCGCATTTGGCAAAGTGGTTTGGCCTGGGTAGGAATGGAATACCTGGAAGAA  
GGATGCGATTCAAGTGTCTCGTGTCTCAAATGGACAAAATTTCAAAGGCATATCTTTTACCACCTTGATTGCGTCTGTAGTATTGTTGCCAG  
GGGAGCCTATTGCAGGGACGAAGGAAGGCTTAGAACTTGACAGAGTGTGGCATTTCTGACAAAATGCTCACAGTATACAAAAT

>Bcin06g01710 (MLST3), partial sequence [organism=Botrytis cinerea, strain N11\_K\_W03]  
GTGAGTCTGACTTTTGTATTTGAGCGTTAAGATAGACTCTGATATACCAAGGCAATCACCTAATTTTCATGGCGTTCTTCCCTGCATCATCTACC  
TACCCTGGAATGCTGGGAGAATTATACTCAGCAGCTTTACAGCTCCTGCTTTCAATTTGGATCTGTTCCCTGCTGTGACAGAAATGGAGACGG  
TTGTAATGGATTGGTTGGCCAAGCTTCTCAATCTCCAGACTGTTATTTGTCTGCTGACTCATGGTGGTGGTGTATCCAAGGATCAGCCTCGGA  
AGCTATCGTTACCGTTATGGTTGCTGCCCGGATAAGTATCTTCGTGAAACCACTGAAGTCTGTGCGGAATTGAACTCGAGGATGCGATTGCA  
TATAAGAGGAGTAAGCTAGTTGCACTAGGAAGCGAAATGGCACACAGCTCCACGCGAAAAGCAGCGCAGATAGCTGGCGTTAGATTCCGATCGA  
TTCCAGTACTCGCATCCAATGATTTTCGCCATGACGGGTGATGATTTAGAGAAGGTATTGAAAGAATGCAAATCTCAAGGATTGGAACCTTCTA  
TCTAACTTCGACGTTGGGAACAACATCTACATGCGCAGTTGACGACTTCGCATCTATTGCAACAGTACTTTCAAATATGCACCTCCAGATGTT  
GCAGGCGAGATCTGGGTTACGTCGATGCTGCTTATGCAGGTGCAGCTTTGGTTTGGCCTGAATACCATCATCTAACATCGTCTTCCAGCATT  
TCCATTCTTTGATATGAACATGCACAAAATGGCTTCTGACAAAATTTGACGCTTCTTGGCTATATGTCAGAAAACGCAAAGATCTGATCGATGC  
ACTCTCCATAACACCAAGTTATCTTCGCAACGAGTTTTTCAGAGAGTGGACTCGTAACCGACTATCGGGACTGGCAAATTCCTCTCGGAAGACGC  
TTCCGAAGCTTAAAGATTTGGTTTGTCTCAGAACCCTAC

>Bcin09g03030 (MLST4), partial sequence [organism=Botrytis cinerea, strain N11\_K\_W03]  
ACCCTTCAACCCACCGCAGCTCCTATACCGAAAAGCGAGTATCCTACCAATTTCTCTTCCACCTGCGACTTTAAGACCATTGGCTTTTTCGCACT  
TTCACAAAAAAGCATAGTTTAAACATTGACGTCGTCGGCATTACAAGTGTGGCTACTTTTATTGGGAAGCATTGTGGGACAGGATGGAGGGAGG  
AAGGACTGGCAGAGAGAGTCTTGGAGGAGGTCGCCAAGAGTTGGAAGAATAGGAGTGGCGGTGTCAATTGTGCGAGGGCGAGGGAACGGAATTGAA  
GGAGATTCTGAAAAGCTTTGGAAGGGAAATATGAGTGGTGGAAAGGATAGTCATAGGAAGAGAGCTAAGCCGGCAGAATAGTTTAGTACTGGGATCA  
TCACAATATGGAGAGGTCAATCATACAAGACTTTGGCTACGCGCCAGGGAATATACCCAGAGAGGATAGTCAAGTCAAGTTTGGGAATATCAACGT  
TGGAGGTCAATGACGAGGAAGATGAGGATGGCCTGATGGATCCAAGAAGTGGTTAAAAGTCTGTTGATGCTTTGAGCAACCTCGACTGGTGTAC



```
AATGTTGCTAAAAAGCACTTTGATAGGTATGTTTCAATGATAAAATTTTATCTGAATCGACTAACTCAGTACAGAGATACCTCCAAACCTTCAT
TGTTCCCACCTGCGTCTCATAAAACACTCCTCTTCCAAAACCGCTATAATGTTATCCATCAACGTCTCCTTCGCAATGAATCTTTTCAAACGCC
CGCTTTTCAAGGTGGCAAATCTTCCCTTCAACGCAGCAGTCCGCCATTACCACCCAACAACAATCATACAAATTAACGCCGATAGCTAATCTT
CTCGGTGCGAATCGCAGCTCTCATATGCTTCTCGGTCTCCTCAGTATTTACCCCACTGGTACCCTCGCCATCAATGACCTGACGGGCAGTATCG
CTCTTGATCTTACACACGCAGCAGCCATTC
```

```
>Bcin11g01310 (MLST5), partial sequence [organism=Botrytis cinerea, strain N11_K_W03]
GACTGACATGGACCTCATGTGGAACCGGCGTAGAATGCACAACGCTTGAAGTTCGGCTCGAATATGGCGATGCAACGTCAACGGCAAAGCCAG
TGTTGCGCTTGCTCGTTATCCTGCCACTGTTGCCGCGAGCAAGAAGCTCGGGTCTCTTTGATAAAATCCCGGTGGACCCGGTGCCCTGGTGT
GGCTTTGTGACAGTCTGGAGCTGGTGGCCGCTCTCGACACTGAGTGGTGGATTATACGATATCATCGGATGGGATCCACGTGGAACCGGTGCTT
CGGCTCCTATTTTGAATGTTTTGCAAAATGCCAGTGCAGGAGTATGATTTTAAACAACGCGTTTCCATCTGCTCCGAATCTCTGGCTCGGACAAT
TGCGAATGCCAGCGCAAATTTCTGCTGTTAGCTCTGCTATCACATCCTTTGACACTTCTGTGCTGCTCTTGCAAAAGCTTGCGTGGCTCAGAAA
TCTCCCGCTCTTTACACCTCAACAGCAGCATATGTTGCTCGAGACATGGCAGCGATAGTCGATGCATTGGATGGGACCTCTGCAAAACTTAACT
ACTGGGGTTTTCTCATATGGAACATCTTCTAGCTGAGTTTATCCAACTTTCCAGGCCGCGTGGGAAGAGTTCTTGCCGATGGTGTTCGAC
CGCAAAGGCAAATGCACTCACATACGTTAGCCAACTTTCCAAACGATCAACTCAGTGTTCGTGCTTCGTTGAACGATTTTGCAGCTTTCTGCACC
ACCGCCGGTAGTAAAGGTTGCTCTTTTGCCACCGCCCTACTGGAACCTCAGGTACTGTTGCTACCAGACTGGACAACATAATGAAGGATATGT
TCCTCAATCCTATTGTTGCTTCGGGCTTGAGCATCA
```

```
>Bcin15g03910 (MLST6), partial sequence [organism=Botrytis cinerea, strain N11_K_W03]
GCCAAAACACAAAATCTTCCAACGATGAAGATGATACTCCACTTCCCTTGATTATCTGGCATGGACTCGGCGATAATTACAAAGCGGATGGTCT
TGCGCAAGTTGGAAAAGTAGCTGAAGCTATTCATCCTGGGACTTTTGTCTATAAATATTCATGTAGATGAGGATGCATCTGCAGATAGGACAGCT
ACCTTCTTTGAAAATCTCACTCGTGAGTACATCCCTATTTTTTCCCTTTAAATACCATACTAACTCTCTTACCAAGTTCAAATCGAAAAGGCTCG
CGAAGACCTCGCCTCCCATCCTATTTCTCTTACCAGCGCCCGCGCTCGACGCAATTTGGATTCTCCCAAGGCGGCCAATTTCTTGCGCGGTTACATA
TCCCCTGCAATGCTCCACCCATCCGCTCTCTCTGACCTTCGGTTCCCAACACAACGGCATTCTGCCTTCCAAGCCTGTGGTCTGCGGATT
TCCTCTGTGCGGGTGTCAAACCTTTTGGGATCCAACACCTGGTCAACCTTTGTCCAATCTCGTCTCGTACCCGCTCAATACTTCAGAGATCC
GGAAAACCTAGACTCTTACCTTGAATATTTCCAATTTCTTGGCGACATCAATAATGAGCGCGTTCTCAAGAACCAAACATATAAATCCAACATG
GAAAATTTGGAACGATTTCGTAATGTATGCTTTTGAAGACGATACAACCTGTATCCCTAAGGAAAGTGGATGGTGGGCTGAAGTCAACGGCACGG
AAGTTACACCACTGAAAGAAAGAGCCATTTATAAAGAAGATTGGCTAGGTTTAAAGACATTTGGATGAGGCCGAAAATTAGTTTTTCGAAACCAT
CCCAGGGGGACATATGACGTTAGGAGAGGAGATGCTAGAGAAGGCTTTCAAAGAGTACTTTGGTCCAGCAGGGAAGAAATTTGGG
```

```
>Bcin16g03460 (MLST7), partial sequence [organism=Botrytis cinerea, strain N11_K_W03]
ATGAACCTCTTAATTTGAACTCTTCATTAATTTGCAAGTGATGAGCCCTATTTCTGCCAGAGGATAGTTACAAGACGTATATCATTTAGTCGAGA
ACCACCTCATGATATACATTTGACGGATTTTGGAAAAGCGAATGAAAAGTAAACACTTGGTTGATGTTAGGTGTGTTATTTATTTCTGATGAAATGAAC
AAGAGAGACTGATGAGATAGTGAACCGCTTTATGAACCGTCTACTGTTTCTCACGGACAGGAAGTTTACCATTGATCCTTCGGTTCGAAATTTCT
GAAGTGGCGGTTTTAGAGAGGGATGAGGTGGTCAAGTGTATTTGAGCATAGAGCGAGGGGCATTTACAGGGTGGAGGACGAGATGGGGATTGAG
AAGCTGAGGACGCAGAGGTATGGGGTTGGAGGACATTTATGGGATGCATTTGTAAGTTTTGGGGGATTGACGAAGGCTTCTGTCTATTTTCTATC
AGTGCAGGATCTTGAAGAAAAGATAGCATGAATACGAGGGCTAATAACTAGGAAATAGCGATTGGAGCGGAGGTAACGTTGGCATAGACCGATTT
AGTACTTTTCATGGTCTATGTCGACGTATCCTCTGATATCGAAGTTGGAGGAACGGAATTTCCACGTATTTGTTGGACCAAAGGAGGAAGGTGGG
AGGACTTCTTGGAACTACGGAAGCATTTGGATCCAAGAACTGGAGAAAATGTAACAGTAGAAGGGGTGACATTCAAACCAATCAAGGGAAATGC
CGTATTTCTGGGAAAATACTGACAACAACGGGAGGGGCTATGATG
```

```
>Bcin12g03020 (MLST8), partial sequence [organism=Botrytis cinerea, strain N11_K_W03]
CGATTGGCTGCGAAGAAAAGTGCAGCACCAGTACCAAAAAGCAGAAATAAACCATCGGCAAGGGAATATTTCTCTGAACCACAACATGACA
CGAGCGCGGAAGAGTATATCGGGCGAGAAGCTTCATCAAGAGCACCAAAGCGACAACGAGTCGATGATAAATATAACTCTTACGGTGGAAAGAAA
TGAGAATACAGCAGCTTATGCTTCCGGGAAACTTCCATCTGGAAGTATAAATGTTGGTGGAGGTAGGAAGACCCTTTTCAAGAAGAACCCTCGA
ACGGCATTGTGCTGCGCAAGTTGCCCTTGAAGTATCAACATTTGGTGGAAAGAAGGCTACCCAAATCGAGGACGAGGGTAGAGCAGCTTATG
CTTCCGGAAAATTTGCCCCAGGAAGTATAAATCTTGGCGCAAAGAAGGCGATTTCAATCCAAAGATGAAACGAGACCGGCTTATGTCCTGGA
GCTTCCACATGGTAGTATGGACGGTATGCGAAACCGTGAATGGCTGCCGTCCACCGCGAAATTTGCTGAGGGTGGGAGGAAACCAGGCCAGGTT
GTCTCTTCTCTATTACATTCATCTACTTCAAAGAAAATTTTCGATGAACCCGAAGAACAAGCGGAACCGGCAAACCATCCAATGCACCTT
TGACAGAGGAAAATGGCGACTTTACCAATCTAGGGTTATCGAGAAGGCTTGCAGCCATCTATCGACTAAACTCGATATGAAAGCCCCGACCGC
CATTCAAAGAGCATCTGTGCAGCAGTTGGTATCGGACGATAGCGATGCTTTCATACAAGCAGAGACTGGATCTGGAAAACCTTTGGCATACTA
CTACCTATAGTCGAGCGAATATTAGCATTGAGTGAGAATGGCGTACAAA
```

```
>Bcin02g07770 (MLST9), partial sequence [organism=Botrytis cinerea, strain N11_K_W03]
CAGCTTTCCCTTTTCGGTCTTGGCATCTACAGTCAATGCCATCCCTACACCATCACAACTTGAGTCTCGGGCCGTTATCGATTCCGATGCCGTTG
TAGGATTTGCCGAAACTGTTCCAGTGGGACCGTAGGAACAGTTTATGAGGCATATAAACCATTCCCTTAAAGTCGTAAATGGATGCGTACCATT
CCCTGCCGTCGATGCATCGGGTAACACAGGGTATGTCTTATACCATTTCTTCCACACGATTGCTATTGAGTCTCTAACATATTTTAGTGGTG
```

```
GTTTGTCAACCACTGGCAGTAGCAATGGTGGTTGCAGCAGCAGTACCGGTCAAGTATATGTTTCGAGGAGGACAAAGCGGATCAAACCTACGCCAT
CATGTACTCCTGGTAAGTTCTCTCTAAACTTCTCCTTATAGATCCAACCTAACAAAATCTTAGGTACATGCCAAAGGACGAGCCCTCAACCGGT
ATTGGTCAACCGTACGATTGGGAAGGTGTAATGTCTGGCTCTCAAGCGCCACCGCCACAACCTGCCGACAACATCTTAGCCGTTTTGTCCTTCCG
CCCACGGAGGCTGGGATTGTTCACCGATGGATATTCCTTTCTGGTACCAGCCCTCTTATCAAGTACGAAAGTATCTGGCCCGTCGATCATTC
AATGGGTCTTACTAGTACTGTTGGTGAAAAACAACCTATGATTGCTTGGGAGTCTTTACCAACTGCTGCTCAAACCTGCTCTTGAGAACACCGAT
TTCGGTGTGCGAATGTTCCATTCATTCGGCTGTTTTTCACAGATAATCT
```

```
>Bcin04g02090 (MLST10), partial sequence [organism=Botrytis cinerea, strain N11_K_W03]
CGGAGGATGATATGGCAAAGTCTATGATTACCAAAGCATTTGTAGGCATGAGTAGTAAACTGTCGAATATGACTATGAATGATGTTTACAAGCC
CTACATCCATGTAAGAAATGTAGAATAGAGAGATCAGTAACTGGAACATAATATCGTTTGCAGGCTTCAAGTTACTTACGCAGTTCAACCCAATC
ACTACAGCTATTGCCGAATCCCCACTATTTCAAATGGCTGTCTCAGCAAATACTATCGAAAAGTACACACTGCTAGGCCCTTTCTTTCAGAATAT
CTCCTCTGCAACAGGAAGTTACCAGGGAATACTTCAAGTGCCTCAAAGACGATAGATAGGCGACACATTGCCACATCTCAAGATGCCTTACGATT
GACTTACAACCCATCAAAAAGATTACTTGTATATCATCAACCCTTTGTTTCGAGCAAGTCCAATCGCCAAAAGCAAACCCCTGGATTGGTTCGC
CTACATTGTGAATCAAAAATCACAAGCGTTCGAGCACTTCAGGTAGACCCGAAAAGAGTGTCTTCTGATGGTTTTATGCACAATGTCACGTGTCGTT
CTAGATGGTCTTTGTGAGCCATTCATGGATACCACATTTCTCAAAAATTTTCGAAGATTGATATTGATTATCTAAGACGTGCGCCTCGTGTAGATA
TCAGGACGAGACCAAGTTGAACGCTGATGAGAAGGCTTCTGAGAAGTATTATGAGGACACTGTTCCCTGGCACCTCTAATTTTCATCTCTGAGGTC
TTCTTTCTGACATTGGCTGCTCATCATATGGTAGTGAAGCTCTTAATGCCACGCATAAGAGTCTGGAGAAAAGACATCAAATATATTTCAAAGC
AATTGACTGCCGTTGAAGCAG
```

```
>Bcin01g07220 (MLST1), partial sequence [organism=Botrytis cinerea, strain N11_K_W06]
ATGGCATATCTTGTCTTTTTCGCATTATGCTTTGGAACGTGCTGGACAAGCTTGGGTTAGTGCTCTGCGTGTAGAAGCACTAAAGAAGATTCT
CCAACAACCGAAGTCATGGTTTTGAGGAATCCAGGAATTCACCTGGCCGGTTGAACGAAAGTTTTGGATAGGAACCTGAGGAAATGCGTAATCTC
GTTGGCCGCTTTGCTGGTATTGTATTCACAGCATTTTTTATGCTATGATATCAATCATTGGGCTTTTCGTGAATACATGGAAACTGACATTAG
CCTCAATGGCAACTGGCCAGTTATATACGCTGTCACCAAAACGTTCAATCGCGTGAGTGGAAAAATGGGAAAACAAGTGAACCTACGCATCTGA
AATGACCACTGGCATATTTTCAGAGACTTTCTCCAACATCAAAGTGGTTTCGGGCTTTTACTCTGGAACTTACTTTGAGACAAAACACACCAAA
GCTACAGAAGAACTTTATAAAGTTGGACTAATACGAGCAAACCTACTCGGGATTGCTGTGGGGATTGACAGATGCGATGTCATTTTTTCATCACTG
CAACTATCTTTTATTATGCCACGGTCTCATTACCAAGAGAGAGATCAGTATCGCGACTGCACCTACAGACTGTCAATCTTCTATTATCTGGTAT
TTCTAATAGTACGAATATGCTGGCCATGATACCACAAAATCAACTCTTCTCGGTTACAGTACGCATATGCTTGCATTAGCCAATCTCGATTCA
TCTTCTCCACGAAAAATAAAGGAACCGAACGGCTTTTCGACAATCTTTCCAATCAAATTCACAGTCTTTCATTCACATACCCCTACTCGTCTGA
AAAACGAACGATATCATCCTTTTCTCTTTCCCTGATTCATAACTCAACAACCTGCACCTGTTCGGACCCCTCCGGCTCCGGAAAATCTACGATAGCT
GCTCTGCTCATTGGTCTCTATCCGCCAGATACTTCAACACCTCCACCGTTGACATTCAATCGCGTCTCCATAAGTAACTGTCACATTCGGTCTC
TCCGGGCTCTCTCTCACTCGTCCACAAAATACCGATTCTATTTCCAGCTACCATTCTCCATAACATCATTTATGGTCTCCAGAATCTTCTCCTT
GTGCTAGTCTTCCATCTGCTATTGCATCAGCAAAAAGATGCTGGGATCCATGAATTTATCACATCGCTTCCACAAGGTTATGATACTAT
```

```
>Bcin05g07690 (MLST2), partial sequence [organism=Botrytis cinerea, strain N11_K_W06]
ACCCTATCACGAAGTCTTTTCTGCACTTTCTCTCATCAAAAACGAACGAGAACATCATCAATAAATACTTTGCTGAAGTAATGGGTTTTATT
TTGGCCAGGATGCCTTCTCTCTACGACAGCAAGCCTTCGATGATATGTTGTGGGTAGTTCTTGGCTGGCTGGATACTGTCAAATTCATTGATTT
ACATTCTGAATTGCACTATTCAAACGACTCTCAGCTAGAATGGTACGACAACAATATAAACCTGCATTTGCACATCGAGCGCGACTATTTTGG
GAATTGGCTTCACAAGGATGGGATACTACTCTCTGTGGTGGTGGGATGATATGGTACCATAACCTTACTCCATAACAAGATGCAATTACCAATG
AACTCTATATCGCAGCTTCGATATCGATGTACCTCTATTTCCCCGGAGATGACAATCAATCCCCATTTATGCTTTCCAACCCCTCATATCCACC
TCACGATCCGAAATATCTACAGGCAGCTGTTGATGCTTACAAATGGCTGAATGGTTCCAACATGACGGATTTACAAGGATTATATGTCGACGGG
TATCATATCTCGAATCTTTCTGGCGGTGAAAACACCCATTCGATTTCTAGAAATGAGATGGTATATACCTACAATCAAGGTGTTTTGCTTACTG
GACAACGTGGTTTTGTATGACGCAACCGCCGACGATCATACCTTGTGGATGGCCACAAACTCATCGCAATGTTATTAATGCCACAGGCTATGA
CCTGAAAACACAATGTTGTCTCTCACCGCCACCCAAAAGATGGTTCCGCATTGGCAAAGTGGTTTTGGCTGGGTAGGAATGGAATACCTGGAAGAA
GGATGCGATTCAAGTCTTCGTGTTCTCAAAAATGGACAACTTTCAAAGGCATATTTCTTACCACCTGATTGCGTCTCTGTAGTGATTTGCCAG
GGGAGCCTATTGCAGGGACGAAGGAAGGCTTAGAACTCGACAGAGTGTGGCATTCTGACAAAATGCTCACAGTATACAAAAT
```

```
>Bcin06g01710 (MLST3), partial sequence [organism=Botrytis cinerea, strain N11_K_W06]
GGTGAGTCTGACTTTTGTATTTGAGCGTTAAGATGGACACTGATGTACCAAGGCAATCACCTAATTTTCATGGCGTCTTCCCTGCATCATCTAC
CTACCCCTGGAATGCTGGGAGAATATACTCAGCAGCTTTTCACAGCTCTGCTTTCAATTTGGATCTGTTCCCTGCTGTGACAGAATTTGGAGACG
GTTGTAATGGATTGGTTGGCCAAGCTTCTCAATCTCCCAGACTGTTATTTGTCTGCTGACTCATGGTGGTGGTGTATCCAAGGATCAGCCTCGG
AAGCTATCGTTACCCTTATGGTTGCTGCCCCGATAAGTATCTTCTGTAACCCTGAAGGTCTGTGCGGAATTGAACTCGAGGATGCGATTGC
ATATAAGAGGAGTAAGCTAGTTGCACTAGGAAGCGAAAATGGCACACAGCTCCACGCAGAAAGCAGCGCAGATAGCTGGCGTTAGATTCCGATCG
ATTCCAGTACTCGCATCCAATGATTTCCGCATGACGGGTGATGATTTAGAGAAGGTATTGAAAGAATGCAAATCTCAAGGATTTGGAACCCCTCT
ATCTAACTTCGACGTTGGGAACAACATCTACATGCGCAGTTGACGACTTCGCATCTATTTGCAACAGTACTTTCAAATATGCACCTCCAGATGT
TGCAGGCGAGATCTGGGTTACGTCGATGCTGCTTATGCAGGTGCAGCTTTGGTTTTGCCCTGAATACCATCATCTAACATCGTCTTCCAGCAT
TTCCATTCCTTTGATATGAACATGCACAAAATGGCTTCTGACAAAATTCGACGCTTCTTGCCTATATGTCAAGAAACGCAAAGATCTGATCGATG
```

CACTCTCCATAACACCAAGTTATCTTCGCAACGAGTTTTTCAGAGAGTGGACTCGTAACCGACTATCGGGACTGGCAAATTCCTCTCGGAAGACG  
TTTCCGAAGCTTAAAGATTTGGTTTGTCTCAGAACCTAC

>Bcin09g03030 (MLST4), partial sequence [organism=Botrytis cinerea, strain N11\_K\_W06]

ACCCTTCAACCCACCGCAGCTCCTATACCGAAAGCGAGTATCTACCAATTCTCCTTCCACCTGCGACTTTAAGACCATTGGCTTTTCGCACT  
TTCACAAAAAAGCATAGTTTAAACATTGACGTCGTCGGCATTACAAGTGTGGCTACTTTTTATTGGAAAGCATTGTGGGACAGGATGGAGGGAGG  
AAGGACTGGCAGAGAGAGTCTTGGAGGAGGTCGCCAAGAGTTGGAAAGATAGGAGTGGCGGTGTCAATTGTTCGAGGGCGAGGGAACGGAATTGAA  
GGAGATTCTGAAAGCTTTGGAAAGGAATATGAGTGGTGGAAAGGATAGTCATAGGAAGAGAGCTAAGCCGGCAGAATAGTTTAGTACTGGGATCA  
TCACAATATGGAGAGGTCAATCATAACAAGACTTGGGCTACGGCCAGGGAATATACCCAGAGAGGATAGTCAGTCAAGTTTGGGAATGTCAACGT  
TGGAGGTCAATGACGAGGAAGATGAGGATGGCCTGATGGATCCAAGAAGGTGGTTAAAAGTCGTTGATGCATTTGAGCAACCTCGACTGGTGT  
CAATGTTGCTAAAAAGCACTTTGATAGGTATGTTTCAATGATAAAAAATTTTATCTGAATCGACTAACTCAGTACAGAGATACCTCCAAACCTTCA  
TTGTTCCACCTGCGTCTCATAAAACACTCCTCTTCCAAAACCGCTATAATGTTATCCATCAACGTCTCCTTCGCAATGAATCTTTTCAAACGC  
CCGCTTTTCAAGGTGGCAAATCTTCCCTTCAACGCAGCAGCTCCGCCATTACCACCAACAACAATCATACAAATTAACGCCGATAGCTAATCT  
TCTCGGTGCGAATCGCAGCTCTCATATGCTTCTCGGTCTCCTCAGTATTTCAACCCTGGTACCCTCGCCATCAATGACCTGACGGGCAGTATC  
GCTCTTGATCTTACACACGCAGCAGCCATTC

>Bcin11g01310 (MLST5), partial sequence [organism=Botrytis cinerea, strain N11\_K\_W06]

ACTGACATGGACCTCATGTGGAACCGGCGTAGAATGCGCAACGCTTGAAGTTCGCTCGAATATGGCGATGCAACGTCAACGGCAAAGCCAGT  
GTTGCGCTTGCTCGTTATCTGCCACTGTTGCCGCGAGCAAGAAGCTCGGGTCTCTCTTGATAAAATCCCGGTGGACCCGGTGCCTCTGGTGTG  
GCTTTGTGCAGTCTGGAGCCGGTGCCCGCTCTGCACACTGAGTGGTGGATTATACGATATCATCGGATGGGATCCACGTGGAACCGGTGCTTC  
GGCTCTATTTTGGAAATGTTTTGCAAATGCCAGTGGGAGTATGATTTTAAACAACGCGTTTCCATCTGCTCCGAATCTCTGGCTCGGACAATTT  
GCGAATGCCAGCGCAAATTTCTGCTGTTAGTCTGCTATCACATCCTTTGACACTTCTGTGCTGCTCTTGCAAAAGCTTGGCTGGCTCAGAAAT  
CTCCCGCTCTTTACACCTCAACAGCAGCATATGTTGTTTCGAGACATGGCAGCGATAGTCGATGCATTGGATGGGACCTCTGCAAACTTAACTA  
CTGGGGTTTCTCATATGGAATATCTTCTAGCTGAGTTTATCCAACTTTCCAGGCCGCTGGGAAGAGTTCTTGCCGATGGTGTTCGAC  
GCAAAGGCAAATGCACTCACATACGTTAGCCAATTTCCCAACGATCAACTCAGTGTTCGTGCTTCGTTGAACGATTTTGCAGCTTTCTGCACCA  
CCGCCGGTAGTAAAGGTTGCTCTTTTGGCACCGCCCTACTGGAACCTCAGGTAAGTGTGCTACCAGACTGGACAACATAATGAAGGATATGTT  
CCTCAATCCTATTGTTGCTTCGGGCTTAAAGCATCA

>Bcin15g03910 (MLST6), partial sequence [organism=Botrytis cinerea, strain N11\_K\_W06]

CGCCAAAACACAAAATCATCCAACGATGAAGATGATACTCCACTTCCCTTGATTATCTGGCATGGACTCGGCGATAATTACAAAGCGGATGGTC  
TTGCGCAAGTTGGAAAACCTAGCTGAAGCTATTCATCCTGGGACTTTTGTCTATAATATTCATGTAGATGAGGATGCATCTGCAGATAGGACAGC  
TACCTTCTTTGGAAATCTCACTCGTGAGTACATCCCTATTTTCTTTAAATACCATACTAACTCTCTTACCAAGTTCAAATCGAAAAGGTCT  
GCGAAGACCTCGCCTCCCATCTATCTCTTACCAGCGCCCGCGTGCAGCAATTTGGATTTCCCAAGGCGGCCAATTTCTTGCGCGGTTACAT  
ATCCCGCTGCAATGCTCCACCCATCCGCTCTCTCCTGACCTTTCGGTTCCCAACACAACGGCATTCTGCTTCCAAGCCTGTGGTCTGCGGAT  
TTCTCTGTGCGGGTCTCAAACCTTTTGGGATCCAACACCTGGTCAACCTTTGTCCAATCTCGTCTCGTACCTGCTCAATACCTCAGAGATC  
CGGAAAACCTAGACTCTTACCTTGAATATTTCCAATTTCTTTGCCGACATCAATAATGAGCGCGTTCTCAAGAACCAAACATATAAATCCAACAT  
GGAAAAATTTGGAACGATTCGTAATGTATGTCTTTGAAGACGATACAACCTGTCATCCCTAAGGAAAGTGGATGGTGGGCTGAAGTCAATGGCAGC  
GAAGTTACACCACTGAAAGAAAGAGCCATTTATAAAGAAGATTGGCTAGGGTTAAAGACATTGGATGAGGCCGAAAAATTAGTTTTCGAAACCA  
TTCCAGGGGGACATATGACGTTAGGAGAGGAGATGCTAGAGAAGGCTTTCAAAGAGTACTTTGGTCCAGCAGGGAAGAAATTTGGG

>Bcin16g03460 (MLST7), partial sequence [organism=Botrytis cinerea, strain N11\_K\_W06]

ATGAACCTCTTAATTTGAACTCTTCAATTAATTGCAAGTATGAGCCCTATTTCTGCCAGAGGATAGTTACAAGACGTATATCATTAGTTCGAGA  
ACCCTCATGATATACATTGACGGATTTTGTAAAAGCGAATGAAAGTAAACACTTGGTTGATGTTAGGTGTGTTATTTATTTCTGATGAAATGAAC  
AAGAGAGACTGATGAGATAGTGAACCGCTTTATGAACCGTCAACTGTTTCTCACGGACAGGAAGTTACCATTGATCCTTCAGTTCCGGAATTTCTG  
AAGTGGCGGTTTTAGAGAGGGATGAGGTGGTTCAGGTGATTTGAGCATAGAGCGAGGCATTTTCAGGGGTGGAGGGCGAGATGGGGATTGAGAA  
GTTGAGGACGCAGAGGTATGGGGTTGGAGGACATTATGGGATGCATTTGTAAGTTTTGGGGATTGACGAAGGCCCTCTGTTTATTTTCTATCAG  
TACGGATCTTGAAAAGAAAAGATAGCATGAACACGAGGGCTAATAACTAGGAAAATAGCGATTGGAGCGGAGGTTAAACGTGGCATAGACCGATTTAG  
TACTTTTCATGGTCTATGTGACGATATCCTCTGATATCGAAGGTGGAGGAACGGAATTTCCACGTATTTGTTGGGACCAAAAGGAGGAAGGTGGGAG  
GACTTCTGAAAACCTACGGAAGCATTGGATCCAAGAACTGGAGAAAATGTAACAGTAGAAGGGGTGACATTTCAAACCAATCAAGGGAAATGCCG  
TATTCTGGGAAAATACTGACAACAACGGGAGGGGCTATGAT

>Bcin12g03020 (MLST8), partial sequence [organism=Botrytis cinerea, strain N11\_K\_W06]

CGATTGGCTGCGAAGAAAACCTGCGCAGCACCAGTCAACAAAAGCACGAATAAACCATCGGCAAGGGAAATATTCTCTGAACCACAACATGACA  
CGAGCGCGGAAGAGTATATCGGGCAAGAAGCTTCATCAAGAGCACCAAAGCGACAACGAGTTCGATGATAAATTATAACTCTTACGGTGGAAAGAAA  
TGAGAATACAGCAGCTTATGCTTCCGGGAAAACCTCCATCTGGAAGTATAAATGTTGGTGGAGGTAGGAAGACCCTTTTCAAGAAGAACCCTCGA  
ACGGCATTGTGCTGCAAGTTGCCCCCTGGAAGTATCAACATTGGTGGAAAGAAGGCTACCCAAATCGAGGACGAGGGTAGAGCAGCTTATG  
CTTCCGAAAATTTGCCCCAGGAAGTATAAATCTGGCGCAAAGAAGGCGATTTCAATCCAAGATGAAACGAGACCGGCTTATGTCTCTGGAAA

```
GCTTCCACATGGTAGTATCGACGGTATGCGAAACCGTGAAATGGCTGCCGTCCACCGCGAAATTGCTGAGGGTGGGAGGAAACCAGGCCAGGTT
GTCTCTTCTCTATTACATTCAATCCTACTTCAAAGAAAACCTTCGATGAACCCGAAGAACAAGCGGAACCGGCAAAACCATCCAATGCACCTT
TGACAGAGGAAATGGCGACTTTACCAATCTAGGGTTATCGAGAAGGCTTGCAGCCCATCTATCGACTAAACTCGATATGAAAGCCCCGACCGC
CATTCAAAAAGCATCTGTGCAGCAGTTGGTATCGGACGATAGCGATGCTTTCATACAAGCAGAGACTGGATCTGAAAAAATTTGGCATATCTA
CTACCTATAGTCGAGCGAATATTAGCATTGAGTGAGAATGGCGTACAAA
```

```
>Bcin02g07770 (MLST9), partial sequence [organism=Botrytis cinerea, strain N11_K_W06]
CAGCTTTCCCTTTTCGGTCTTGGCATCTACAGTCATTGCCATCCCTACACCATCACAACTTGAGTCTCGGGCCGTTATCGATTCCGATGCCGTTG
TAGGATTTGCCGAAACTGTTCCAGTGGGACCGTAGGAACAGTTTACGAGGCATATAAACCATTCCTTAAAGTCGTAAATGGATGCGTACCATT
CCCTGCCGTCGATGCATCGGGTAACACAGGGTATGTCTTATAACCATTCCTTCCACACGATTGCTATTGAGACTCTAACATATTTTAGTGGTG
GTTTGTACCAACTGGCAGTAGCAATGGTGGTTGCAGCAGCAGTACCGGTCAAGTATATGTTTCGAGGAGGACAAAGCGGATCAAACCTACGCCAT
CATGTACTCCTGGTAAGTTCTCTCTAAACTTCTCCTTATAGATCCAACCTAACAAAATCTTAGGTACATGCCAAAGGACGAGCCCTCAACCGGT
ATTGGTCACCGTCACGATTGGGAAGGTGTAATTGTCTGGCTCTCAAGCGCCACCGCCACAACCTGCCGACAACATCTTAGCCGTTTGTCTTCCG
CCCACGGAGGCTGGGATTGTTCCACCGATGGCTATTCCCTTCTGGTACCAGCCCTCTTATCAAGTACGAAAGTATCTGGCCCCGTCGATCATTC
AATGGGTCTTACTAGTACTGTTGGTGGAAAAACAACCTATGATTGCTTGGGAGTCTTTACCAACTGCTGCTCAAACCTGCTCTTGAGAACACCGAT
TTCGGTGTGCGAATGTTCCATTCATTCCGGCTGTTTTACAGATAATCT
```

```
>Bcin04g02090 (MLST10), partial sequence [organism=Botrytis cinerea, strain N11_K_W06]
CGGAGGATGATATGGCAAAGTCTATGATTACCAAAGCATTTGTAGGCATGAGTAGTAAACTGTGCAATATGACTATGAATGATGTTTACAAGCC
CTACATCCATGTAAGAAAATGTAGAATAGAGAGATCAGTAACTGGAACATAATATCGTTTGCAGGCTTCAAGTTACTTACGCAGTTCAACCCAAT
CACTACAGCTATTGCCGAATCCCCTACTATTTCAAATGGCTGTCTCAGCAAATACCATCGAAAAGTACACACTGCTAGGCCCTTCTTTCAGAATA
TCTCCTCTGCAACAGGAAGTTACCAGGGAATACTTCAAGTGCGCCAAAAACGATAGATAGGCGACACATTGCCACATCTCAAGATGCCCTTACGAT
TGACCTTACAAAACCATCAAAAAAGATTTACTTGTATATCATCAACCCTTGTTCGAGCAAGTCCAATCGCCAAAAGCAAAACCCCTGGATTGGTT
CGCTACATTGTGAATCAAAATCACAAGCGTCGAGCACTTCAGGTAGACCCGAAAGAAGTGTCTTCTGATGGTTTTATGCACAATGTCACGTGTC
GTTCTAGATGGTCTTTGTGAGCCATTCATGGATACCACATTCCTCAAAAATTTGAAAGATTGATATTGATTATCTAAGACGTGCGCCTCGTGTAG
ATATCAAGGACGAGACCAAGTTGAACGCTGATGAGAAGGCTTCTGAGAAGTATTATGAGGACACTGTTCTGGCACCTTCTAATTTTCATCTCTGA
GGTCTTCTTCTGACATTGGCTGCTCATCATTATGGTAGTGAAGCTCTTAATGCCACGCATAAGAGTCTGGAGAAAGACATCAAATATATTTCAA
AAGCAATTGACTGCCGTTGAAGCA
```

```
>Bcin01g07220 (MLST1), partial sequence [organism=Botrytis cinerea, strain N11_K_W08b]
ATGGCATATCTTGTCTTTTCGATTATGCTTTGGAACGTGCTGGACAAGCTTGGGTTAGTGCTCTGCGTGTAGAAGCACTAAAGAAGATTCTC
CGACAACCGAAGCCATGGTTTTGAGGAATCCAGGAATTCACCTAGCCGGTTGAACGAAAGTTTTGGATAGGAACTCTGAGGAAATGCGTAATCTC
GTTGGCCGCTTTGCTGGTATTGTATTACAGCATTTTTTTATGCTATTGATATCAATCATTTGGGCTTTTCGTGAATACATGGAACCTGACATTAG
TCTCAATGGCAACTGGCCAGTTATATACGCTGTCAACAAAACGTTCAATCGCGTGAGTGGAAAATGGGAAAACAAGTGCAACTACGCATCTGA
AATGACCACTGGCATATTTTCAGAGACTTCTCCAACATCAAAGTGGTTTCGGGCTTTTACTCTGAAAACCTACTTTAAGACAAAACACACCAAA
GCTACAGAAGAACTCTATAAAGTTGGACTAATACGAGCAAACTACTCGGGATTGCTGTGGGGATTGACAGATGCAATGTCATTCCTTCATCACTG
CAACTATCTTTTATTATGCCACGGTTCTCATTACCAAGAGAGAGATCAGTATCGCGGCTGCACTACAGACTGTCAATCTTCTATTATTTGGTAT
TTCTAATAGTACGAATATGCTGGCCATGATACCACAAATCAACTCTTCTCGGTTACAGCTACGCATATGCTTGCATTAGCCAATCTCGATTCA
TCTTCTCCACGAAAATAAAGGAACCGAACGGCTTTTCGACAATCTTTCCAATCAAATCAACCGTCTTTTCATTCACATACCCCTACTCGTCCTG
AAAAACGAACGATATCATCTTTTCTCTTTCCCTGATTCTAACTCAACAACTGCACTTGTCCGACCCCTCCGGCTCCGAAAATCTACAATAGC
TGCTCTGCTCATTGGTCTCTATCCGCCAGATACTTCAACACCTCCACCGTTGACATTCATCGCGTCTCCATAAGTAACTGTCACATTCGGTCT
CTCCGGGCTTCTCTCTCACTCGTTCACAAAATACCGATTCTATTTCCAGTACCATTCTCCATAACATCATTTATGGTCTCCAGAATCTTCTC
CTTGTGCTAGTCTTCCATCTGCTATTGCATCAGCAAAAAGATGCTGGGATCCATGAATTTATCACATCGCTTCCACAAGGTTATGATACTATG
```

```
>Bcin05g07690 (MLST2), partial sequence [organism=Botrytis cinerea, strain N11_K_W08b]
ACCACTATACCAAGTCTTTTCTGCACTTTCCTCATCAAAAACGAACGAGAACATCATCAATAAATACTTTGCTGAAGTAATGGGTTTTATT
TTGGCCAGGATGCCTTCTCTCTACGACAGCAAGCCTTCGATGATATGTTGTGGGTAGTTCTTGGCTGGCTGGATACTGTCAAATTCATTGATTT
ACATTCTGAATTGCACTATTCAAACGACTCTCAGCCAGAATGGTACGGACAACAATATAAACCTGCATTTGCACATCGAGCGGACTATTTTGG
GAATTGGCTTACAAGGATGGGATACTACTCTCTGTGGTGGTGGGATGATATGGTACCATACTTACTCCATAACAAGAACGCAATTACCAATG
AACTCTATATCGCAGCTTCGATATCGATGTACCTATATTTCCCGGAGATGACAATCAATCCCCATTTATGCTTTCCAACCCCTTCATATCCACC
TCACGATCCGAAAATATCTACAGGCAGCTGTTGATGCTTACAAATGGCTGAATGGTTCCAACATGACGGATTTACAAGGATTATATGTCGACGGG
TACCATATCTCGAATCTTCTGCGGTGAAAACACCCATTCGATTTAGAAATGAGATGGTATATACCTACAATCAAGGTGTTTTGCTTACTG
GACAACGTGGTTTGTATGACGCAACCGCCGACGATCATACCTTGTAGATGGCCACAAACTCATCGCAATGTTATTAATGCCACAGGCTATGA
CCTGAAACACAATGTTGTCATCTCACCGCCACCCAAAAGATGGTTCCGCATTGGCAAAGTGGTTTTGGCTGGGTAGGAATGGAATACTGGAAGAA
GGATGCGATTCAAGTGCTTCGTGTTCTCAAAAATGGACAAAATTTCAAAGGCATATCTTTTCATCACTTGATTGCGTCTGTAGTGAATTTGCCAG
GGGAGCCTATTGCAGGGACGAAGGAAAGCTTAGAACTCGACAGAGTGTGGCATTCTGACAAAATGCTCACAGTATACAAAAT
```

>Bcin06g01710 (MLST3), partial sequence [organism=Botrytis cinerea, strain N11\_K\_W08b]  
GTGAGTCTGACTTTTGTATTTGAGCGTTAAGATAGACACTGATATACCAAGGCAATCACCTAATTTTCATGGCGTTCTTCCCTGCATCATCTACC  
TACCCTGGAATGCTGGGGAATTATACTCAGCAGCTTTCACAGCACCTGCTTTCAATTGGATCTGTTCCCTGCTGTGACAGAATTGGAGACGGT  
TGTAATGGATTGGCTGGCCAAGCTTCTCAATCTCCCAGACTGTTATTTGTCTCCGACTCATGGTGGTGGTGTATCCAAGGATCAGCCTCGAAG  
CTATCGTTACCGTTATGGTTGCTGCCCGGATAAAATATCTTCGTGAACTACTGAAGTCTGTGCGGCATTGAGCTCGAGGATGCGATTGCATA  
TAAGAGGAGTAAGCTAGTTGCACTAGGAAGCGAAATGGCACACAGCTCCACGCGAAAAGCAGCGCAAATAGCTGGCGTTAGATTGATCGATTTC  
CAGTACTCGCATCCGATGATTTCCGCATAACGGGTGATGATTTAGAGAAGGTATTGAAAGAAATGCAAATCTCAAGGATTGGAACCCCTTCTATCT  
AACTTCGACTTTGGGAACAACATCTACATGCGCAGTTGACGACTTCGCATCTATTGCAACAGTACTTTCAAATATGCACCTCCAGATGTTGCA  
GGCGAGATCTGGGTTACGTCGATGCTGCTTATGCAGGTGCAGCTTTGGTTTGCCTGAATACCGTCATCTAACATCGTCTTCCAGCATTTCC  
ATTCTTCGATATGGACATGCACAAATGGCTTCTGACAAATTTGACGCTTCTTGTCTATATGTCAAGAAACGCAAAGATCTGATCGATGCACCT  
CTCCATAACACCAAGTTATCTTCGCCAACGAGTTTTCAGAGAGTGGACTCGTAACCGACTATCGGGACTGGCAAATTCCTCTCGGAAGACGCTT  
CCGAAGCTTAAAGATTTGGTTTGTCTCAGAACCTA

>Bcin09g03030 (MLST4), partial sequence [organism=Botrytis cinerea, strain N11\_K\_W08b]  
ACCCTTCAACCCACCAGCTCCTATACCAAAAGCGAGTATCCTACCAATTTCTCCTTCCACCTGCGACTTTAAGACCATTGGCTTTCCGCACT  
TTCACAAAAAAGCATAGTTTAAACATTGACGTCGTCGGCATTACAAGTGTGGCTACTTTTATTGGAAAGCATTTGTGGACAGGATGGAGGGAAG  
AAGGACTGGCAGAGAGAGTCTTGGAGGAGGTGCGCAAGAGTTGGAAGAAATAGGAGTGGCGGTGTCATTGTGCGAGGGCAGGGAACGGAATTGAA  
GGAGATTCTGAAAGCTTTGGAAGGGAATATGAGTGGTGGAAAGGATAGTTCATAGGAAGAGAGCTAAGCCGGCAGAATAGTTTAGTACTGGGATCA  
TCACAATATGGAGAGGTCAATCATAACAAGACTTGGGCTACGGCCAGGGAATATACCAGAGAGGATAGTCAAGTCTTGGGAATGTCAACGT  
TGGAGGTCAATGACGAGGAAGATGAGGATGGCCTGATGGATCCAAGAAGTGGTTAAAAGTCATTGATGCATTTGAGCAACCTCGACTGGTGT  
CAATGTTGCTAAAAAGCACTTTGATAGGTATGTTTCAATGATAAAAATTTTATCTGAATCGACTAACTCAGTACAGAGATACCTCCAAACCTTCA  
TTGTTCCACCTGCGTCTCATAAAAACACTCCTCTTCCAAAACCGCTATAATGTTATCCATCAACGCTCTCCTTCGCAATGAATCTTTTCAAACGC  
CCGCTTTTCAAGGTGGCAAATCTTCCCTTCAACGCGACGCTCCGCCATTACCACCAACAACAATCATACAAATTAACGCCGATAGCTAATCT  
TCTCGGTGCAATCGCAGCTCTCATATGCTTCTCGGTCTCCTCAGTATTTACCCACTGGTACCCTCGCCATCAATGACCTGACGGGCAGTATC  
GCTCTCGATCTTACACACGCGCAGCCATTC

>Bcin11g01310 (MLST5), partial sequence [organism=Botrytis cinerea, strain N11\_K\_W08b]  
ACTGACATGGACCTCATATGGAACCGCGTAGAATGCGCAACGCTTGAAGTTCGCTCGAATATGGCGATGCAACGTCGACGGCAAAGCCAGT  
GTTGCGCTTGCTCGTTATCTGCCACTGTTGCCGCGAGCAAGAAGCTCGGGTCTCTCTTGATAAAACCCCGGTGGACCCGGTGCCTCTGGTGTG  
GCTTTGTGCACTCTGGAGCCGGTGCCCGCTCTCGACACTGAGTGGTGGATTGTACGATATCATCGGATGGGATCCACGTGGAACCGGTGCTTC  
GGCTCCTATTTTGGAAATGTTTTCGAAATGCCAGTGGGAGTATGATTTTAAACAACGCGCTTCCATCTGCTCCGAATCTCTGGCTCGGACAATTT  
GCGAATGCCAGCGCAAATTTCTGCTGTTAGCTCTGCTATCACATCCTTTGACACTTCTGTGCTGCTCTTGGAAAAGCTTGGCTGGCTCAGAAAT  
CTCCCGCTCTTTACACCTCAACAGCAGCATATGTTGCTCGAGACATGGCAGCGATAGTCGATGCATTGGATGGGACCTCTGCAAACTTAACTA  
CTGGGGTTTCTCATATGGAACCTATTTTCCCTAGCTGAGTTTATCCAACTTTCCAGGCCGTGTGGAAAGAGTCTTGGCCGATGGTGTTCGAC  
GCAAAGGCAAATGCACTCACATACGTTAGCCAATTTCCCAACGATCAACTCAGTGTTCGTGCTTCTGTTGAACGATTTTGCAGCTTCTGCACCA  
CCGCCGGTAGTAAAGGTTGCTCTTTTGGCACC GCCCTACTGGAACCTCAGGTACTGTTGCTACCAGACTGGACAACATAATGAAGGATATGTT  
CCTCAATCCTATTGTTGCTTCGGGCTTAAAGCATCAG

>Bcin15g03910 (MLST6), partial sequence [organism=Botrytis cinerea, strain N11\_K\_W08b]  
GCCAAAACACAAAATCATCCAACGATGAAGATGATACTCCACTTCCCTTGATTATTTGGCATGGACTCGGCGATAAATTACAAAGCGGATGGTCT  
TGCGCAAGTTGGAAAACCTAGCTGAAGCTATTCATCCTGGGACTTTTGTCTACAATAATTCATGTAGATGAGGATGCATCTGCAGATAGGACAGCT  
ACCTTCTTTGGAAATCTCACTCGTGAGTACATCCCTATTTTCCCTTTAAATACCATACTAACTCTCTACCAAGTTCAAATCGAAAAGGTCTG  
CGAAGACCTCGCCTCCATCCTATTTCTCTTACC GCGCCCGCTCGACGCAATTTGGATTCTCCCAAGGCGGCAATTTCTTGGCGGTTACATA  
TCCCCTGCAATGCTCCACCCATCCGCTCTCTCCTGACCTTCGGTTCCCAACACAACGGCATTTCTGCTTCCAAGCCTGTGGTCTGCCGATT  
TCCTCTGTGCGGTTGCTCAAACCCCTTTGCGATCCAACACCTGGTCAACCTTTGTCCAATCTCGTCTCGTACCCTCAATACTTCCAGAGATCC  
GGAAAACCTAGACTCTTACCTTGAATATTTCAATTTCTTGGCGACATCAATAATGAGCGGTTCTCAAGAACCAAACATATAAATCCAACATG  
GAAAAATTTGGAACGATTCGTAATGTATGCTTTGAAAGACGATACAACCTGTCATCCCTAAGGAAAGTGGATGGTGGGCTGAAGTCAACGGCACGG  
AAGTTACACCACTGAAAGAAAGAGCCATTTATAAAGAAGATTGGCTAGGTTTAAAGACATTTGGATGAGGCCGAAAATTAGTTTTCGAAACCAT  
TCCAGGGGGACATATGACGTTAGGAGAGGAGATGCTAGAGAAGGCTTTCAAAGATATTTTGGTCCAGCAGGGAAGAAATTTGGG

>Bcin16g03460 (MLST7), partial sequence [organism=Botrytis cinerea, strain N11\_K\_W08b]  
CATGAACCTCTTGATTTGAACTCTTCATTAATTGCAAGTGATGAACCCCTATTTCTGCCAGAGGATAGTTACAAGACGTATATCATTAGTTCGAG  
AACCCTCATGATATATATTGACGGATTTTGGAAAGCGAATGAAAGTAAACATTTGGTTGATGTTAGGTGTGTTATTTATCTGATGAAATGAA  
CAAGAGAGACTGATGAGATAGTGAGCCGCTTTATGAACCGTCAACTGTTTCTCACGGACAGGAAGTTACCATTGATCCTTTCAGTTCCGGAATCT  
GAAGTGGCGGTTTGTAGAGAGGGATGAGGTGGTCAAGTGTATTGAGCATAGAGCGAGGGCATTTTCAGGGGTGGAGGGGCGAGATGGGGATTGAGA  
AGTTGAGGACGCGAGGATGAGGTTGGAGGACATTATGGGATGCATTTGTAAGTTTGGGGGATTGACGAAGGCTTCTGTCTATTTTCTATCA  
GCACGGATCTTGAAGAAAGATAGCATGAACACGCGGGCTAATAACTAGGAAATAGCGATTGGAGCGGAGGTAAACGTGGCATAGACCGATTTA

GTACTTTCATGGTCTATGTTCGACGTATCCTCTGATATCGAAGGTGGAGGAACGGAATTCCCACGTATCGTGGGACCAAAGGAGGAAGGTGGGA  
GGACTTCTTGAAACTACGGAAGCATTGGATCCAAGAACTGGAGAAAAATGTAACAGTAGAAGGGGTGACATTCAAACCAATCAAGGGAAATGCC  
GTATTCTGGGAAAAATACTGACAACAACGGGAGGGGCTATGAT

>Bcin12g03020 (MLST8), partial sequence [organism=Botrytis cinerea, strain N11\_K\_W08b]  
CGATTGGCTGCGAAGAAAACGCGCAGCACCAGTACACAAAAGCAGAAATAAACCATCGGCAAGGAAAATATTCTCTGAACCACAACATGACA  
CGAGCGCGGAAGAGTATATCGGGCGAGAAGCTTCATCAAGAGCACCAAAGCGACAACGAGTCGATGATAAATTATAACTCTTACGGTGGAAAGAAA  
TGAAAAATACAGCAGCTTATGCTTCCGGGAAAACCTCCATCTGGAAGTATAAATGTTGGTGGAGGTAGGAAGACCCTTTTCAAGAAGAACCACGA  
ACGGCATTGTTCGCTGGCAAGTTGCCCCCTGGAAGTATCAACATTTGGTGGAAAGAAGGCTACCCAAATCGAGGACGAGGGTAGAGCAGCTTATG  
CTTCCGGAAAATTGCTCCAGGAAGTATAAACTCTGGCGCAAAGAAGGCGATTTCAATCCAAGATGAAACGAGACCGGCTTATGTCTCCGGAAA  
GCTTCCACATGGTAGTATCGACGGTATGCGAAAACCGTGAAATGGCTGCCGTCCACCGCGAAAATTGCTGAGGGTGGGAGGAAAACCAGGCCAGGTT  
GTCTCTTCTCTATTACATTCATCTACTTCAAAGAAAACCTTTTGATGAACCCGAAGAACAAGCGGAACCGGCAAACCATCCAATGCGCCTT  
TGACAGAGGAAAATGGCGACTTTCACCAATCTAGGGTTATCGAGAAGGCTTGCAGCCATCTATCGACTAAACTCGATATGAAAGCTCCGACCGC  
CATTCAAAAAGCATCTGTACAGCAGTTGGTATCGGACGATAGCGATGCTTTCATACAAGCAGAGACTGGATCTGGAAAAACCTTTGGCATATCTA  
CTACCTATAGTCGAGCGAATATTAGCATTGAGTGAGAAATGGCGTACAAA

>Bcin02g07770 (MLST9), partial sequence [organism=Botrytis cinerea, strain N11\_K\_W08b]  
CAGCTTTCCTTTTCGGTCTTGGCATCTACAGTCATTGCCATCCCTACACCATCACAACTTGAGTCTCGGGCCGTTATCGATTCCGATGCCGTTG  
TAGGATTTGCCGAAAACGTGCCAGTGGGACCGTAGGAACAGTTTATGAGGCATATAAACCATTCCTTAAAGTCGTAAATGGATGCGTACCATT  
CCCTGCCGTCGATGCATCGGGTAACACAGGGTATGTCTTATATCTTTCTCTTCCACACGATTGCTATTGAGTCTTAACATATTTTAGTGGTG  
GTTTGTACCAACTGGCAGTAGCAATGGTGGTTGCAGCAGCAGTACCGGTCAAGTATATGTTTCGAGGAGGACAAAGCGGATCAAACACGCCAT  
CATGTACTCTGGTAAAGTTCTCTCTAAAACCTTCTCCTTATAGATCCAACCTAACAAAACTTATAGGTACATGCCAAAGGACGAGCCCTCAACCGGT  
ATTGGTCAACCGTACGATTGGGAAGGTGTAATTTGCTGGCTCTCCAGCGCCACCGCCACAACCTGCCGACAACATCTTAGCCGTTTGTCTTCCG  
CCCACGGAGGCTGGGATTGTTCCACGGATGGCTATTCCCTTTCTGGTACCAGCCCTTATCAAGTACGAAAGTATCTGGCCCGTCGATCACTC  
AATGGGTCTTACTAGTACTGTTGGTGGAAAAACAACCTATGATTGCTTGGGAGTCTTACCAACTGCTGCTCAAACCTGCTCTTGAGAACACCGAT  
TTCGGTGTGCGAATGTTCCATTTCATTCCGGCTGTTTTTCACAGACAATCT

>Bcin04g02090 (MLST10), partial sequence [organism=Botrytis cinerea, strain N11\_K\_W08b]  
CGGAGGATGATATGGCAAAGTCTATGATTACCAAAGCATTGTAGGCATGAGTAGTAAACTGTGCAATATGACTATGAATGATGTTTACAAGCC  
CTACATCCATGTAAGAAAATGTAGAATAGAGAGATCAGTAACTGGAACATAATATCGTTTGTAGGCTTTCAAGTTACTTACGCAGTTCAACCCAAAT  
CACTACAGCTATTGCCGAATCCCCTACTATTCAAATGGCTGTCTCAGCAAATACCATCGAAAAGTACACACTGCTAGGCCCTTTCTTTCAGAATA  
TCTCCTCTGCAACAGGAAGTTACCAGGGAATACTTCAAGTGCGCCAAAGACGATAGATAGGGCAGACATTGCCACATCTCAAGATGCCTTACGAT  
TGACCTTACAAAACCATCAAAAAAGATTTACTTGTATATCATCAACCACTTTGTTTCGAGCAAGTCCAATCGCCAAAAGCAAAACCTTGGATTGGTT  
CGCTACATTGTGAATCAAAATCACAAGCGTCGAGCACTTTCAGGTAGACCCGAAAGAAGTGTCTTCTGATGGCTTTATGCACAATGTCACCTGTC  
GTTCTAGATGGTCTTTGTGAGCCATTCTATGGATACCACATTTCTCGAAAATTTCAAGATTGATATTGATTATCTAAGACGTGCGCCTCGTGTAG  
ATATCAAGGACGAGACCAAGTTGAACGCTGACGAGAAGGCTTCTGAGAAGTATTATGAGGACACTGTTCCGGCACCTTCAATTTTCATCTCTGA  
GGTCTTCTTTCTCACATTGGCTGCTCATATTATGGTAGTGAAGCTCTTAATGCCACGCATAAGAGTCTGGAGAAAGACATCAAATATATTCAA  
AAGCAATTGACTGCCGTTGAAGCAG

>Bcin01g07220 (MLST1), partial sequence [organism=Botrytis cinerea, strain N11\_K\_W11]  
ATGGCATATCTTGTCTTTCTTTTCGCATTATGCTTTGGAACGTGCTGGACAAGCTTGGGTTAGTGTCTGCGTGTAGAAGCACTAAAGAAGATTCT  
CGACAACCGAAGTCATGGTTTGGAGAAATCCAGGAATTCACCTAGCCGGTTGAACGAAGTTTGGATAGGAACCTGAGGAAATGCGTAATCTC  
GTTGGCCGCTTTGCTGGTATTGTATTCACAGCATTTTTTATGCTATTGATATCAATCATTTGGGCTTTTGTGAATACATGGAAACTGACATTAG  
TCTCGATGGCAAACCTGGGCCAGTTATATACGCTGTCAACAAAACATTCATTCGCGTGAGTGAAAAATGGGAAAACAAGTGCAACTACGCCCTCTGA  
AATGACCACTGGCATATTTTCAGAGACTTCTCCAACATCAAAGTGGTTCGGGCTTTTACTCTGGAAACTTACTTTGAGACAAAACACACCAA  
GCTACAGAAGAACTTTATAAAGTTGGACTAATACGAGCAAACCTACTCGGGATTGCTGTGGGATTGACAGATGCGATGTCATTTCTATCACTG  
CAACTATCTTTTATTATGCCACGGTTCTCATTACCAAGAGAGAGATCAGTATCGCGACTGCACCTACAGACTGTCAATCTTCTATTTATTTGGTAT  
TTCTAATAGTACGAATATGCTGGCCATGATACCACAAAATCAACTCTTCTCGCGTTACAGCTACGCATATGCTTGCATTAGCCAATCTCGATTCA  
TCTTCTCCACGAAAATAAAGGAACCGAACGGCTTTCGACAATCTTTCCAATCAAATTCACCGTCTTTTCAATTCACATACCTACTCGTCTG  
AAAAACGAACGATATCATCTTTTCTCTTTCCCTGATTCTTAACTCAACAACCTGCATTGTCGGACCCCTCCGGCTCCGAAAATCTACAATAGC  
TGCTCTGCTCATTGGTCTCTATCCGCCAGATACTTCAACACCTCCACCGTTGACATTCATTCGCGTCTCCATAAGTAACTGTCACATTCGGTCT  
CTCCGGGCTTCTCTCTCACTCGTTCCACAAAATACCGATTCTATTTCCAGCTACCATTCTCCATAACATCATTTATGGTCTCCAGAACTTCTCT  
CTTGTGCTAGTCTTCCATCAGCTATTGCATCAGCAAAAGATGCTGGGATCCATGAATTTATCACATCGCTTCCACAAGGTTATGATACTAT

>Bcin05g07690 (MLST2), partial sequence [organism=Botrytis cinerea, strain N11\_K\_W11]  
ACCCTATCACCAAGTCTTTTCTGCACTTTCTCTCATCAAAAACGAACGAGAACATCATCAATAAATACTTTGCTGAAGTAAATGGGTTTTATT  
TTGGCCAGGATGCCTTCTCTCTACGACAGCAAGCCTTCGATGATATGTTGTGGGTAGTCTTGGCTGGCTGGATACTGTCAAATTCATTGATTT

```
ACATTCTGAATTGCACTATTCAAACGACTCTCAGCCAGAATGGTACGGACAACAATATAAACCTGCATTTGCACATCGAGCGGACTATTTTGG
GAATTGGCTTCACAAGGATGGGATACTACTCTCTGTGGTGGTGGGATGATATGGTACCATACCTTACTCCATACAAGAACGCAATTACCAATG
AACTCTATATCGCAGCTTCGATATCGATGTACCTATATTTCCCGGAGATGACAATCAATCCCCATTTATGCTTTCCAACCCCTTCATATCCACC
TCACGATCCGAAATATCTACAGGCAGCTGTTGATGCTTACAAATGGCTGAATGGTTCCAACATGACGGATTTACAAGGATTATATGTGACGGG
TACCATATCTCGAATCTTTCTGGCGGTGAAAACACCCATTGCGATTCTAGAAATGAGATGGTATATACCTACAATCAAGGTGTTTTGCTTACTG
GACAACGTGGTTTGTATGACGCAACC GCCGACGATCATACCTTGTAGATGGCCACAAACTCATCGGAATGTTATTAATGCCACAGGCTATGA
CCTGAAAACACAATGTTGTCTATCTACCGCCACCCAAAAGATGGTTCCGCATTGGCAAAGTGGTTTGGCCGGGTAGGAATGGAATACCTGGAAGAA
GGATGCGATTCAAGTGCTTCGTGTTCTCAAATGGACAAACTTTCAAAGGCATATTTCTTTCATCACTTGATTGCGTTCTGTAGTGATTTGCCAG
GGGAGCCTATTGCAGGGACGAAGGAAAGCTTAGAACTCGACAGAGTGTGGCATTCTGACAAATGCTCACAGTATACAAAATGG
```

>Bcin06g01710 (MLST3), partial sequence [organism=Botrytis cinerea, strain N11\_K\_W11]

```
GTGAGTCTGACTTTTGTATTTGAGCGTTAAGATAGACACTGATGTACCAAGGCAATCACCTAATTTTCATGGCGTTCCTCCCTGCATCATCTACC
TACCCTGGAATGCTGGGAGAATTATACTCAGCAGCTTTCACAGCACCTGCTTTC AATTGGATCTGTTCCCTGCTGTGACAGAATTGGAGACGG
TTGTAATGGATTGGCTGGCCAAGCTTCTCAATCTCCAGACTGTTATTTGTCTTCGACTCATGGTGGTGGTGTATCCAAGGATCAGCCTCGGA
AGCTATCGTTACCGTTATGGTTGCTGCCCGGATAAAATATCTTCGTGAACTACTGAAGTCTGTGCGGCATTGAGCTCGAGGATGCGATTGCA
TATAAGAGGAGTAAGCTAGTTGCACTAGGAAGCGAAATGGCACACAGCTCCACGCAGAAAGCAGCGCAAATAGCTGGCGTTAGATTCCGATCGA
TTCCAGTACTCGCATCCAATGATTTGCCATGACGGGTGATGATTTAGAGAAGGTAATTGAAAGAATGCAAATCTCAAGGATTGGAACCCCTCTA
TCTAACTTCGACTTTGGGAACAACATCTACATGCGCAGTTGACGACTTCGCATCTATTTGCAACAGTACTTTCAAATAATGCACCTCCAGATGTT
GCAGGCGAGATCTGGGTTACGTCGATGCTGCTTATGCAGGTGCAGCTTTGGTTTGGCCGTGAATACCATCATCTAACATCGTCTTCCAGCATT
TCCATTCCCTTCGATATGAACATGCACAAATGGCTTCTGACAAATTTGACGCTTCTTGTCTATATGTCAAGAAACGCAAAGATCTGATCGATGC
ACTCTCCATAACACCAAGTTATCTTCGCAACGAGTTTTTCAGAGAGTGGACTCGTAACCGACTATCGGGACTGGCAAATTCCTCTCGGAAGACGC
TTCCGAAGCTTAAAGATTTGGTTTGTCTCAGAACCCTAC
```

>Bcin09g03030 (MLST4), partial sequence [organism=Botrytis cinerea, strain N11\_K\_W11]

```
GACCCTTCAACCCACCGCAGCTCCTATAACGAAAGCGAGTATCCTACCAATTCCTTCCACCTGCGACTTTAAGACCATTGGCTTTCCGCAC
TTTTCACAAAAAGCATAGTTTAAACATTGACGTCGTCGGCATTACAAGTGTGGCTACTTTTATTTGAAAGCATTGTGGGACAGGATGGAGGGAA
GAAGGACTGGCAGAGAGAGTCTTGGAGGAGTTCGCCAAGAGTTGGAAGAATAGGAGTGGCGGTGTCATTTGTCGAGGGCGAGGGAACGGAATTGA
AGGAGATTCTGAAAGCTTTGGAAGGGAATATGAGTGGTGGAAAGGATAGTCATAGGAAGAGAGCTAAGCCGGCAGAATAGTTTAGTACTGGGATC
ATCACAATATGGAGAGGTCAATCATACAAGACTTGGGCTACGGCCAGGGAATATACCCAGAGAGGATAGTCAGTCAAGTTTGGGAATGTCAACG
TTGGAGGTCAATGACGAGGAAGATGAGGATGGCCTGATGGATCCAAGAAGGTGGTTAAAAGTCATTGATGCATTTGAGCAACCTCGACTGGTGT
ACAATGTTGCTAAAAAGCACTTTGATAGGTATGTTTCAATGATAAAATTTTATCTGAATCGACTAACTCAGTACAGAGATACCTCCAAACCTTC
ATTGTTCCACCTGCGTCTCATAAAACACTCCTCTTCCAAAACCGCTATAATGTTATCCATCAACGTCCTCTTCGCAATGAATCTTTTCAAACG
CCCGCTTTTCAAAGGTGGCAAATCTTCCCTTCAACGCAGCACGTCGCCATTACCACCCAACAACAATCATACAAATTAACGCCGATAGCTAATC
TTCTCGGTGCAATCGCAGCTCTCATATGCTTCTCGGTCTCCTCAGTATTTACCCACTGGTACCCTCGCCATCAATGACCTGACGGGCAGTAT
CGCTCTCGATCTTACACACGCAGCAGCCATTC
```

>Bcin11g01310 (MLST5), partial sequence [organism=Botrytis cinerea, strain N11\_K\_W11]

```
ACTGACATGGACCTCATGTGGAACCGGCTAGAATGCGCAACGCTTGAAGTTCCGCTCGAATATGGCGATGCAACGTCAACGGCAAAGCCAGT
GTTGCGCTTGCTCGTTATCTGCCACTGTTGCCGCGAGCAAGAAGCTCGGGTCTCTCTTGATAAACCCCGGTGGACCCGGTGCCCTGGTGTG
GCTTTGTGAGTCTGGAGCCGGTGCCCGGCTCGACACTGAGTGGTGGATTGTACGATATCATCGGATGGGATCCACGTGGAACCGGTGCTTC
GGCTCCTATTTTGGAAATGTTTTGCAAATGCCAGTGGGAGTATGATTTTAAACAACGCTTTCCATCTGCTCCGAATCTCTGGCTCGGACAATTT
GCGAATGCCAGCGCAAATTCGCTGTAGCTCTGCTATCACATCCTTTGACACTTCTGTGCTGCTCTTGCAAAAAGCTTGCCTGGCTCAGAAAT
CTCCCGCTCTTTACACCTCAACAGCAGCATATGTTGCTCGAGACATGGCAGCGATAGTCGATGCATTTGGATGGGACCTCTGCAAACTTAACTA
CTGGGGTTTCTCATATGGAACATCTTCCCTAGCTGAGTTTATCCAACTTTCCCGAGCCGCGTGGGAAGAGTTCTTGCCGATGGTGTTCGCAC
GCAAAGGCAAATGCACTCACATACGTTAGCCAACCTTCCCAACGATCAACTCAGTGTTCGTGCTTTCGTTGAACGATTTTGCAGCTTTCTGCACCA
CCGCCGGTAGTAAAGGTTGCTCTTTTGCACCGCCCTACTGGAACCACAGGTAAGTGTGCTACCAGACTGGACAACATAATGAAGGATATGTT
CCTCAATCCTATTGTTGCTTCGGGCTTAAAGCATCA
```

>Bcin15g03910 (MLST6), partial sequence [organism=Botrytis cinerea, strain N11\_K\_W11]

```
GCCAAAACACAAAATCATCCAACGATGAAGATGATACTCCACTTCCCTTGATTATCTGGCATGGACTCGGCGATAATTACAAAGCGGATGGTCT
TGCGCAAGTTGGAAAACCTAGCTGAAGCTATTCATCTGGGACTTTTGTCTACAATATTCATGTAGATGAGGATGCATCTGCAGATAGGACAGCT
ACCTTCTTTGAAAATCTCACTCGTGAGTACATCCCTATTTTTCCTTTAAATATCATACTAACTCTCTTACCAAGTTCAAATCGAAAAGGTCTG
CGAAGACCTCGCCTCCATCCTATTTCTCTTACC GCGCCCGCTCGACGCAATTTGGATTCTCCCAAGGCGGCAATTTCTTGCCTGGTTACATA
TCCCCTGCAATGCTCCACCCATCCGCTCTCTCTGACCTTCGGTTCCCAACACAACGGCATTCTTGCCTTCCAAGCCTGTGGTCTGCCGATT
TCTCTGTGCGGGTGTCAAACCCCTTTTGGGATCCAACACCTGGTCAACCTTTGTCCAATCTCGTCTCGTACCCGCTCAATACTTCAGAGATCC
GGAAAACCTAGACTCTTACCTTGAATATTTCAAATTTCTTGGCGACATCAATAATGAGCGGCTTCTCAAGAACCAAACATATAAAATCCAACATG
GAAAAATTGGAACGATTGTAATGTATGCTTTGAAAGACGATACAACTGTCATCCCTAAGGAAAGTGGATGGTGGGCTGAAGTCAACGGCACGG
```

AAGTTACACCACTGAAAGAAAGAGCCATTTATAAAGAGATTGGCTAGGTTTAAAGACATTGGATGAGGCCGAAAATTAGTTTTTCGAAACCAT  
TCCAGGGGGACATATGACGTTAGGAGAGGAGATGCTAGAGAAGGCTTCAAGAGTATTTTGGTCCAGCAGGGAAGAAATTTGGG

>Bcin16g03460 (MLST7), partial sequence [organism=Botrytis cinerea, strain N11\_K\_W11]  
CATGAACCTCTTAATTTGAACTCTTCATTATTTGCAAGTGATGAACCCCTATTTCTGCCAGAGGATAGTTACAAGACGTATATCATTTAGTTCGAG  
AACCCTCATGATATATATTGACGGATTTTTGAAAGCGAATGAAAGTAAACATTTGGTTGATGTTAGGTGTGTTATTTATTTCTGATGAAATGAA  
CAAGAGAGACTGATGAGATAGTGAGCCGCTTTATGAACCGTCAACTGTTTCTCACGGACAGGAAGTTACCATTGATCCTTCAGTTCGGAATTTCT  
GAAGTGGCGGTTTTAGAGAGGGATGAGGTGGTCAAGTGTATTGAGCATAGAGCGAGGGCATTTCAGGGGTGGAGGGGCGAGATGGGGATTGAGA  
AGTTGAGGACGCAGAGGTATGGGGTTGAGGACATTATGGGATGCATTTGTAAGTTTTGGGGGATTGACGAAGGCTTTTGTCTATTTTCTACCA  
GTACGGATCTTGAAAGAAAGATAGCATGAACACGAGGGCTAATAACTAGGAAATAGCGATTGGAGCGGAGGTAAACGTGGCATAGACCGATTTA  
GTACTTTTCATGGTCTATGTGCGACGTATCCTCTGATATCGAAGGTGGAGGAACGGAAATCCCACGTATCGTGGGACCAAAGGAGGAAGGTGGGA  
GGACTTCTTGAAACTACGGAAGCATTGGATCCAAGAACTGGAGAAAATGTAACAGTAGAAGGGGTGACATTCAAACCAATCAAGGGAAATGCC  
GTATTCTGGGAAAATACTGACAACAACGGGAGGGGCTATGAT

>Bcin12g03020 (MLST8), partial sequence [organism=Botrytis cinerea, strain N11\_K\_W11]  
CGATTGGCTGCGAAGAAAACCTGCGCAGCACCGAGTCACCAAAGCACGAATAAACCATCGGCAAGGGAAATATTTCTCTGAACCACAACATGACA  
CGAGCGCGAAGAGTATATCGGGCGAGAAGCTTCATCAAGAGCACCAAAGCGACAACGAGTGCATGATAAATTATAACTCTTACGGTGGAAAGAAA  
TGAAAATACAGCAGCTTATGCTTCCGGGAAAACCTCCATCTGGAAGTATAAATGTTGGTGGAGGTAGGAAGACCCTTTTCAAGAAGAACCACGA  
ACGGCATTGTGCTGCGCAAGTTGCCCCCTGGAAGTATCAACATTTGGTGGAAAGAAGGCTACTCAAATCGAGGACGAGGGTAGAGCAGCTTATG  
CTTCCGAAAATTTGCCCTCCAGGAAGTATAAACTCTGGCGCAAAGAAGGCGATTTTCATTTCCAAGATGAAACGAGACCAGGCTTATGTCTCCGAAA  
GCTTCCACATGGTAGTATCGACGGTATGCGAAAACCGTAAATGGCTGCCGTCCACCGCGAAAATGCTGAGGGTGGGAGGAAACCAGGCCAGGTT  
GTCTCTTCTCTATTACATTTCAATCTACTTCAAAGAAAACCTTTTGATGAACCCGAAAGCAAGCGGAACCGGCAAACCATCCAATGCGCCTT  
TGACAGAGGAAAATGGCGACTTTCCACCAATCTAGGGTTATCGAGAAGGCTTGCAGCCCATCTATCGACTAAACTCGATATGAAAGCTCCGACCGC  
CATTCAAAAAGCATCTGTACAGCAGTTGGTATCGGACGATAGCGATGCTTTCATACAAGCAGAGACTGGATCTGGAAAAACCTTTGGCATATCTA  
CTACCTATAGTCGAGCGAATATTAGCATTTAGTGTGAGTGAAGTGGCGTACAAA

>Bcin02g07770 (MLST9), partial sequence [organism=Botrytis cinerea, strain N11\_K\_W11]  
CAGCTTTCCCTTTCCGCTTGGCATCTACAGTCAATGCCATCCCTACACCATCACAACCTTGAGTCTCGGGCCGTTATCGATTCCGATGCCGTTG  
TAGGATTTGCCGAAAACCTGTTCCAGTGGGACCGTAGGAACAGTTTATGAGGCATATAAACCATTTCCCTTAAAGTCGTAAATGGATGCGTACCATT  
CCCTGCCGTCGATGCATCGGGTAACACAGGGTATGTCCCTTATATCTTTCTCTTCCACACGATTGCTATTGAGTCTCTAACATATTTTAGTGGTG  
GTTTGTACCAACTGGCAGTAGCAATGGTGGTTGCAGCAGCAGTACCGGTCAAGTATATGTTTCGAGGAGGACAAAGCGGATCAAACCTACGCCAT  
CATGTACTCTGGTAAAGTTCTCTCTAAACTTCTCCTTATAGATCCAACCTAACAAAATCTTAGGTACATGCCAAAGGACGAGCCCTCAACCGGT  
ATTTGGTCAACCGTACAGATTGGGAAGGTGTAATTTGCTGGCTCTCCAGCGCCACCGCCACAACCTGCCGACAACATCTTAGCCGTTTGTCTTCCG  
CCCACGGAGGCTGGGATTGTTCCACGGATGGCTATTTCCCTTTCTGGTACCAGCCCTCTTATCAAGTACGAAAAGTATCTGGCCCGTCGATCACTC  
AATGGGTCTTACTAGTACTGTTGGTGGAAAACAACCTATGATTGCTTGGGAGTCTTTACCAACTGCTGCTCAAACCTGCTCTTGAGAACACCGAT  
TTCGGTGTGCGAATGTTCCATTCATTTCCGGCTGTTTTTCACAGACAATCT

>Bcin04g02090 (MLST10), partial sequence [organism=Botrytis cinerea, strain N11\_K\_W11]  
CGGAGGATGATATGGCAAAGTCTATGATTACCAAAGCATTTGTAGGCATGAGTAGTAAACTGTGCAATATGACTATGAATGATGTTTACAAGCC  
CTACATCCATGTAAGAAAATGTAGAATAGAGAGATCAGTAACTGGAACATAATATCGTTTTGTAGGCTTTCAAGTTACTTACGCAGTTCAACCCAAT  
CACTACAGCTATTGCCGAATCCCCACTGTTTCAAATGGCCGCTCTCAGCAAATACCATCGAAAAGTACACACTGCTAGGCCCTTTCTTTCAGAATA  
TCTCCTCTGCAACAGGAAGTTACCAGGGAATACTTCAAGTGCGCCAAAGACGATAGATAGGCGACACATTGCCACATCTCAAGATGCGTTACGAT  
TGACCTTACAAAACCATCAAAAAGATTTACTTGTATATCATCAACCACTTTGTTTCGAGCAAGTCCAATCGAAAAAGCAAAACCCCTGGATTGGTT  
CGCTACATTTGTGAATCAAAAATCACAAGCGTCGAGCACTTCAGGTAGACCCGAAAAGAGTGTCTTCTGATGGCTTTATGCACAATGTCACCTGTC  
GTTCTAGATGGTCTTTGTGAGCCATTCATGGATACCACATTTCTCGAAAATTTGCAAGATTGATATTGATTATCTAAGACGTGCGCCTCGTGTAG  
ATATCAAGGACGAGACCAAGTTGAACGCTGACGAGAAGGCTTCTGAGAAGTATTATGAGGACACTGTTCTGGCACCTCTAATTTTCATCTCTGA  
GGTCTTCTTTCTCACATTTGGCTGCTCATTTATGGTAGTGAAGCTCTTAATGCCACGCATAAGAGTCTGGAGAAAAGACATCAAATATATTTCAA  
AAGCAATTGACTGCCGTTGAAGCA

>Bcin01g07220 (MLST1), partial sequence [organism=Botrytis cinerea, strain N11\_K\_W14]  
ATGGCATATCTTGTCTTTCTTTTCGCATTATGCTTTGGAACGTGCTGGACAAGCTTGGGTTAGTGTCTGCGTGTAGGAGCACTAAAGAAGATTCT  
CGCACAACCGAAGTCAATGTTTGGAGAAATCCAGGAATTCACCTAGCCGTTGAAACGAAGTTTTGGATAGGAACCTGAGGAAATGCGTAATCTC  
GTTGGCCGCTTTGCTGGTATTGATTTACAGCATTTTTTATGCTATTGATATCAATCATTTGGGCTTTCTGTAATACATGGAAACTGACATTAG  
TCTCGATGGCAACTGGGCCAGTTATATACGCTGTCACCAAAAACGTTCAATCGCGTGTAGTGGAAAATGGGAAAACAAGTGAACCTACGCCCTCTGA  
AATGACCACTGGCATATTTTTCAGAGACGTTCTCCAACATCAAAGTGGTTCCGGCTTTACTCCGAAAACCTACTTTGAGACAAAACACACCAAAG  
CTACAGAAGAACTTTATAAAGTTGGACTAATACGAGCAAACCTACTCGGATTGCTGTGGGGATTGACAGATGCGATGTCATTTCTCATCACCGCA  
ACTATCTTTTATATGCCACGGTCTCATTTACCAAGAGAGAGATCAGTATCGGACTGCACTACAGACTGTCAATCTTCTATTTATTTGGTATTT



CTAATAGTACGAATATGCTGGCCATGATACCACAAAATCAACTCTTCTCGCGTTACAGCTACGCATATGCTTGCATTAGCCAATCTCGATTTCATC  
TTCTCCCACGAAAATAAAGGAACCGAACGGCTTTCGACAATCTTCCAATCAAATCAACCGTCTTTCATTACATACCCTACTCGTCCTGAA  
AAACGAACGATATCATCTTTCTCTTTCCCTGATTCCTAACTCAACAACTGCACCTGTTCGGACCCCTCCGGCTCCGAAAAATCTACAATAGCTG  
CTCTGCTCATTGGTCTCTATCCGCCAGATACTTCAACACCTCCACCGTTGACATTCATCGCGTCTCCATAAGTAACTGTCACATTCGGTCTCT  
CCGGGCTTCTCTCTCACTCGTTCCACAAAATACCGATTCTATTTCCAGCTACCATCTCCATAACATCATTTATGGTCTCCAGAAATCTTCTCTCT  
TGTGCTAGTCTTCCATCTGCTATTGCATCAGCAAAAAGATGCTGGGATCCATGAATTTATCACATCGCTTCCACAAGGTTATGATACTAT

>Bcin05g07690 (MLST2), partial sequence [organism=Botrytis cinerea, strain N11\_K\_W14]  
ACCACTATCACCAAGTCTTTTCTGCACTTTCCTCATCAAAAACGAACGAGAACATCATCAATAAAATACTTTGCTGAAGTAATTGGGTTTTATT  
TTGGCCAGGATGCCTTCTCTCTACGACAGCAAGCCTTCGATGATATGTTGTGGGTAGTTCTTGGCTGGCTGGATACTGTCAAATTCATTGATTT  
ACATTCTGAATTGCACTATTCAAACGACTCTCAGCCAGAAATGGTACGGACAACAATATAAAACCTGCATTTGCACATCGAGCGCGACTATTTTGG  
GAATTGGCTTCCACAAGGATGGGATACTACTCTCTGTGGTGGTGGGATGATATGGTCACCATACCTTACTCCATAACAAGAACGCAATTACCAATG  
AACTCTATATCGCAGCTTCGATATCGATGTACCTATACTTCCCCGAGATGACAATCAATCCCATTATGCTTTCCAACCCCTTCGTATCCACC  
TCACGATCCGAAATATCTACAGGCAGCTGTTGATGCTTACAAATGGCTGAATGGTTCCAACATGACGGATTTACAAGGATTATATGTCGACGGG  
TACCATATCTCGAATCTTTCTGGCGGTGAAAAACCCCATTCGCGATTCTAGAAATGAGATGGTATATAACCGACAATCAAGGTGTTTTGCTTACTG  
GACAACGTGGTTTTGTATGACGCAACCGCCGACGATCATACTTGTAGATGGCCACAAACTCATCGCAATGTTATTAATGCCACAGGCTATGA  
CCTGAAACACAATGTTGTCATCTCACCGCCACCCAAAGATGGTTCGCAATGGCAAAGTGGTTTTGGCTGGGTAGGAATGGAATACGGAAGAG  
GATGCGATTCAAGTGTCTCGTGTCTCAAAAATGGACAAACTTTCAAAGGCATATTTCTTTCATCACTTGATTGCGTTCTGTAGTGATTTGCCAGG  
GGAGCCTATTGCAGGGACGAAGGAAAGCTTAGAACTCGACAGAGTGTGGCATTCTGACAAATGCTCACAGTATACAAAAT

>Bcin06g01710 (MLST3), partial sequence [organism=Botrytis cinerea, strain N11\_K\_W14]  
GTGAGTCTGACTTTTGTATTTGAGCGTTAAGATAGACACTGATATACCAAGGCAATCACCTAATTTTCATGGCGTTCTTCCCTGCATCATCTACC  
TACCCTGGAATGCTGGGAGAATTATACTCAGCAGCTTTCACAGCACCTGCTTTCAAATTGGATCTGTTCCCTGCTGTGACAGAATTGGAGACGG  
TTGTAATGGATTGGCTGGCCAAGCTTCTCAATCTCCAGACTGTTATTTGTCTTCGACTCATGGTGGTGGTGCATCCAAGGATCAGCCTCGGA  
AGCTATCGTTACCGTTATGGTTGCTGCCCGGATAAAATATCTTCGTGAAACTACTGAAGGTCGTCCGGCATTGAACTCGAGGATCGGATTCGA  
TATAAGAGGAGTAAGCTAGTTGCACTAGGGAGCGAAATGGCACACAGCTCCACGCGAAGCAGCGCAAATAGCTGGCGTTAGATTCCGATCGA  
TTCCAGTACTCGCATCCAATGATTTCCGCATGACGGGTGATGATTTAGAGAAGGTATTTGAAAGAATGCAAATCTCAAGGATTGGAACCCTTCTA  
TCTAACTTCGACTTTGGGAACAACATCTACATGCGCAGTTGACGACTTCGCATCTATTGCAACAGTACTTTCAAATAATGCACCTCCAGATGTT  
GCAGGCGAGATCTGGGTTACGTCGATGCTGCTTATGCAGGTGCAGCTTTGGTTTTGCCCTGAATACCATCATCTAACATCGTCTTCCAGCAT  
TCCATTCTTCGATATGAACATGCACAAAATGGCTTCTGACAAAATTTGACGCTTCTTGTCTATATGTCAAGAAACGCAAAGATCTGATCGATGC  
ACTCTCCATAACACCAAGTTATCTTCGCAACGAGTTTTTCAGAGAGTGGACTCGTAACCGACTATCGGGACTGGCAAATTCCTCTCGGAAGACGC  
TTCCGAAGCCTAAAGATTTGGTTTTGTCTCAGAACCTACG

>Bcin09g03030 (MLST4), partial sequence [organism=Botrytis cinerea, strain N11\_K\_W14]  
ACCCTTCAACCCACCGCAGCTCTATACCGAAAGCGAGTATCTTACCAATCTCTTCCACCTGCGACTTTAAGACCATTGGCTTTCCGCACT  
TTCACAAAAAAGCATAGTTTAAACATTGACGTCGTCGGCATTACAAGTGTGGCTACTTTTATTGGAAAGCATTGTGGGACAGGATGGAGGGAAG  
AAGGACTGGCAGAGAGAGTCTTGGAGGAGGTCGCCAAGAGTTGGAAGAATAGGAGTGGCGGTGTCAATTGTGCGAGGGCAGGGAACGGAATTGAA  
GGAGATTCTGAAAGCTTTGGAAGGGAATATGAGTGGTGAAGGATAGTCATAGGAAGAGAGCTAAGTCGGCAAAAATAGTTTAGTACTGGGATCA  
TCACAATATGGAGAGGTCAATCATAACAAGACTTGGGCTACGGCCAGGGAATATACCCAGAGAGGATAGTCAGTCAAGTTTGGGAATGTCAACGT  
TGGAGGTCAATGACGAGGAAGATGAGGATGGCCTGATGGATCCAAGAAGGTGGTTAAAAGTCATTGATGCATTTGAGCAACCTCGACTAGTGTA  
CAATGTTGCTAAAAAGCACTTTGATAGGTATGTTTCAATGATAAAAATTTTATCTGAATCGACTAACTCAGTACAGAGATACCTCCAAACCTTCA  
TTGTTCCCACCTGCGTCTCATAAAAACACTCCTCTTCCAAAACCGCTATAAATGTTATCCATCAACGTCTCTTTCGCAATGAATCTTTTCAAACGC  
CCGCTTTTCAAGGTGGCAAATCTTCCCTTCAACGCGACGCTCCGCCATTACCACCCAACAACAATCATACAAATTAACGCCGATAGCTAATCT  
TCTCGGTGCGCAATCGCAGCTCTCATATGCTTCTCGGTCTCCTCAGTATTTACCCCACTGGTACCCTCGCCATCAATGACCTGACGGGCAGTATC  
GCTCTCGATCTTACACACGCAGCAGCCATT

>Bcin11g01310 (MLST5), partial sequence [organism=Botrytis cinerea, strain N11\_K\_W14]  
ACTGACATGGACCTCATGTGGAACCGCGTAGAATGCGCAACGCTTGAAGTTCGCTCGAATATGGCGATGCAACGTCAACGGCAAAGCCAGT  
GTTGCGCTTGCTCGTTATCTGCCACTGTTGCCGCGAGCAAGAAGCTCGGGTCTCTCTTGATAAAATCCCGGTGGACCCGGTGCCTCTGGTGTG  
GCTTTGTGCACTGAGAGCCGGTGCCCGCTCTCGACACTGAGTGGTGGATTGTACGATATCATCGGATGGGATCCACGTGGAACCGGTGCTTC  
GGCTCTATTTTGGAAATGTTTTGCAAATGCCAGTGCAGGATATGATTTTAAACAACGCGTTTCCATCTGCTCCGAATCTCTGGCTCGGACAATTT  
GCGAATGCCAGCGCAAATTTCTGCTGTTAGCTCTGCTATCACATCTTTGACACTTCTGTGCTGCTCTTGCAAAAGCTTGGCTGGCTCAGAAAT  
CTCCCGCTCTTTACACCTCAACAGCAGCATATGTTGCTCGAGACATGGCAGCGATAGTCGATGCATTTGGATGGGACCTCTGCAAAAACCTTAACTA  
CTGGGGTTTCTCATATGGAACATATTTTCTAGCTGAGTTTATCCAAACTTTCCAGGCCGCGTGGGAAGAGTTCTTGGCCGATGGTGTTCGCAC  
GCAAAGGCAAATGCACTCACATACGTTAGCCAACTTCCCAACGATCAACTCAGTGTTCGTGCTTCTGTTGAACGATTTTGCAGCTTTCTGCACCA  
CCGCCGGTAGTAAAGGTTGCTCTTTTGGCACC GCCCTACTGGAACCACAGTACTGTTGCTACCAGACTGGACAACATAATGAAGGATATGTT  
CCTCAATCCTATTGTTGCTTCGGGCTTAAAGCATCA

>Bcin15g03910 (MLST6), partial sequence [organism=Botrytis cinerea, strain N11\_K\_W14]  
GCCAAAACACAAAATCATCCAACGATGAAGATGATACTCCACTTCCCTTGATTATCTGGCATGGACTCGGCGATAATTACAAAGCGGATGGTCT  
TGCGCAAGTTGGAAAAGTAGCTGAAGCTATTCATCCTGGGACTTTTGTCTACAATATTCATGTAGATGAGGATGCATCTGCAGATAGGACAGCT  
ACCTTCTTTGGAAAATCTCACTCGTGAGTACATCCCTATTTTTTCCCTTTAAATATCATACTAACTCTCTTACCAAGTTCAAAATCGAAAAGGTCTG  
CGAAGACCTCGCCTCCATCCTATTCTCTTACCAGCGCCCGCTCGACGCAATTGGATTCTCCAAGGCGGCAATTCTTGGCTGGCTACATA  
TCCCCTGCAATGCTCCACCCATCCGCTCTCTCTGACCTTCGGTTCCCAACACACGGCATTTCTGCCCTTCCAAGCCTGTGGTCTGCCGATT  
TCCTCTGTGCGGGTGTCAAACCTTTTGGCATCCAACACCTGGTCAACCTTTGTCCAATCTCGTCTCGTACCCGCTCAATACTTCAGAGATCC  
GGAAAACCTAGACTCTTACCTTGAATATTCCAATTTCTTGGCGACATCAATAATGAGCGGTTCTCAAGAACCAAACATATAAAATCCAACATG  
GAAAAATTGGAACGATTCGTAATGTATGTCTTTGAAGACGATACAACCTGTCATCCCTAAGGAAAGTGGATGGTGGGCTGAAGTCAACGGCACGG  
AAGTTACACCACTGAAAAGAAAGAGCCATTTATAAAAGAAAGATTGGCTAGGTTTAAAGACATTTGGATGAGGCCGAAAAATTAGTTTTCGAAACCAT  
TCCAGGGGGACATATGACGTTAGGAGAGGAGATGCTAGAGAAGGCTTTCAAAGAGTATTTTGGTCCAGCAGGGAAGAAATTTGGG

>Bcin16g03460 (MLST7), partial sequence [organism=Botrytis cinerea, strain N11\_K\_W14]  
ATGAACCTCTTGATTTGAACTCTTCATTAATTGCAAGTGATGAACCCCTATTCTGCCAGAGGATAGTTACAAGACGTATATCATTAGTCGAGA  
ACCACTCATGATATATATTGACGGATTTTTGAAAAGCGAATGAAAGTAAACATTTGGTTGATGTTAGGTGTGTTATTTATCTGATGAAATGAAC  
AAGAGAGACTGATGAGATAGTGAGCCGCTTTATGAACCGTCAACTGTTTCTCACGGACAGGAAGTTACCATTGATCCTTCAGTTCGGAATTCG  
AAGTGGCGGTTTTAGAGAGGGATGAGGTGGTCAAGTGTATTGAGCATAGAGCGAGGGCATTTCAAGGGTGGAGGGGCGAGATGGGGATTGAGAA  
GTTGAGGACGCAGAGGTATGGGGTTGGAGGACATTATGGGATGCATTTGTAAGTTTTGGGGGATTGACGAAGGCTTCTGTCTATTTTCTATCAG  
CACGGATCTTGAAAAGAAAGATAGCATGAACACGCGGGCTAATAACTAGGAAATAGCGATTGGAGCGGAGGTAAACGTGGCATAGACCGATTTAG  
TACTTTTCATGGTCTATGTGACGTATCCTCTGATATCGAAGGTGGAGGAACGGAAATCCCACGTATCGTGGGACCAAAGGAGGAAGGTGGGAG  
GACTTCTGGAAAACCTACGGAAGCATTTGGATCCAAGAACTGGAGAAAAATGTAACAGTAGAAGGGGTGACATTCAAACCAATCAAGGGAAATGCCG  
TATTCTGGGAAAATACTGACAACAACGGGAGGGGCTATGAT

>Bcin12g03020 (MLST8), partial sequence [organism=Botrytis cinerea, strain N11\_K\_W14]  
TCGATTGGCTGCGAAGAAAAGTGCAGCAGCACCAGTCAACAAAAGCACGAATAAACCATCGGCAAGGGAAATATTCTCTGAACCACAACATGAC  
ACGAGCGCGGAAGAGTATATCGGGCGAGAAGCTTCATCAAGAGCACCAAAGCGACAACGAGTGCATGATAATTATAACTCTTACGGTGGAAAGAA  
ATGAAAATACAGCAGCTTATGCTTCCGGGAAAACCTCCATCTGGAAGTATAAAATGTTGGTGGAGGTAGGAAGACCACTTTTCAAGAAGAACCAG  
AACGGCATTTGTGCTGGCAAGTTGCCCCCTGGAAGTATCAACATTTGGTGGAAAAGAGGCTACTCAAATCGAGGACGAGGGTAGAGCAGCTTAT  
GCTTCCGGAAAATTTGCCCTCCAGGAAGTATAAACTCTGGCGCAAAGAAGGCGATTTCAATCCAAAGATGAAACGAGACCGGCTTATGTCTCCGGAA  
AGCTTCCACATGGTAGTATCGACGGTATGCGAAAACCGTGAATGGCTGCCGTCCACCGCGAAAATGCTGAGGGTGGGAGGAAACCAGGCCAGGT  
TGCTCTTCTCTATTCACATTCATCCTACTTCAAAGAAAACCTTTTGTGTAACCCGAAAGAACAGCGGAAACCGGCAAAACCATCCAATGCGCCT  
TTGACAGAGGAAATGGCGACTTTCACCAATCTAGGGTTATCGAGAAGGCTTGACAGCCCATCTATCGACTAAACTCGATATGAAAGCTCCGACCG  
CCATTCAAAGCATCTGTACAGCAGTTGGTATCGGACGATAGCGATGCTTTCATACAAGCAGAGACTGGATCTGGAAAAACCTTTGGCATATCT  
ACTACCTATAGTCGAGCGAATATTAGCATTGAGTGAGAATGGCGTACAAAT

>Bcin02g07770 (MLST9), partial sequence [organism=Botrytis cinerea, strain N11\_K\_W14]  
CAGCTTTCCCTTTCCGCTTTGGCATCTACAGTCATTGCCATCCCTACACCATCACAACCTTGAGTCTCGGGCCGTTATCGATTCCGATGCCGTTG  
TAGGATTTGCCGAAACTGTTCCAGTGGGACCGTAGGAACAGTTTATGAGGCATATAAACCATTCCTTAAAGTCGTAAATGGATGCGTACCATT  
CCCTGCCGTCGATGCATCGGGTAACACAGGGTATGTCTTATATCTTTCTCTTCCACACGATTGCTATTTAGTCTCTAACATATTTTAGTGGTG  
GTTTGTCAACAACTGGCAGTAGCAATGGTGGTTGCAGCAGCAGTACCGGTCAAGTATATGTTTCGAGGAGGACAAAGCGGATCAAACCTACGCCAT  
CATGTACTCCTGGTAAGTCTCTCTAAACTTCTCCTTATAGATCCAACCTAACAAAATCTTAGGTACATGCCAAAGGACGAGCCCTCAACCGGT  
ATTGGTCAACGTCACGATTGGGAAGGTGTAATTTGCTGGCTCTCCAGCGCCACCGCCACAACCTGCGGACAACATCTTAGCCGTTTTGTCTTCCG  
CCCACGGAGGCTGGGATTGTTCCACGGATGGCTATTTCCCTTTCTGGTACCAGCCCTCTTATCAAGTACGAAAGTATCTGGCCCGTCGATCACTC  
AATGGGTCTTACTAGTACTGTTGGTGGAAAACAACCTATGATTGCTTGGGAGTCTTTACCAACTGCTGCTCAAACCTGCTCTTGGAGAACACCGAT  
TTCGGTGTGCGAATGTTCCATTCAATCCGGCTGTTTTACAGACAATCT

>Bcin04g02090 (MLST10), partial sequence [organism=Botrytis cinerea, strain N11\_K\_W14]  
CGGAGGATGATATGGCAAAGTCTATGATTACCAAAGCATTTGTAGGCATGAGTAGTAAACTGTCGAATATGACTATGAATGATGTTTACAAGCC  
CTACATCCATGTAAGAAAATGTAGAATAGAGAGATCAGTAACTGGAACATAATATCGTTTTGTAGGCTTTCAAGTTACTTACGCAGTTCAACCCAAT  
CACTACAGCTATTGCCGAATCCCCACTGTTCAAATGGCCGCTCTCAGCAAATACCATCGAAAAGTACACACTGCTAGGCCCTTTCTTTCAGAATA  
TCTCCTCTGCAACAGGAAGTTACCAGGGAATACTTCAGTGCGCCAAAGACGATAGATAGGCGACACATTTGCCACATCTCAAGATGCGTTACGAT  
TGACCTTACAAACCATCAAAAAGATTTACTTGTATATCATCAACCACTTTGTTTCGAGCAAGTCCAATCGCAAAAAGCAAAAACCTGGATTGGTT  
CGCTACATTTGTGAATCAAAAATCAAAAGCTCGAGCACTTCAGGTAGACCCGAAAGAGTGTCTTCTGATGGCTTTATGCACAATGTCACGTGTC  
GTTCTAGATGGTCTTTGTGAGCCATTCAATGGATACCACATTTCTCGAAAAATTTGGAAGATTGATATTGATTATCTAAGACGTGCGCCTCGTGTAG  
ATATCAAGGACGAGACCAAGTTGAACGCTGACGAGAAGGCTTCTGAGAAGTATTTATGAGGACACTGTTCTTGGCACCTTCAATTTTCATCTCTGA  
GGTCTTCTTCTCACATTTGGCTGCTCATATTATGGTAGTGAAGCTCTTAATGCCACGCATAAGAGTCTGGAGAAAGACATCAAATATATTTCAA

AAGCAATTGACTGCCGTTGAAGCA

>Bcin01g07220(MLST1), partial sequence [organism=Botrytis cinerea, strain N11\_S\_E08]  
ATGGCATATCTTGTCTTTTCGCATTATGCTTTGGAACTGCTGGACAAGCTTGGGTTAGTGTCTGCGTGTAGAAGCACTAAAGAAGATTCT  
CGACAACCGAAGTCATGGTTTGGAGAAATCCAGGAATTCACCTGGCCGGTTGAACGAAGTTTGGATAGGAACCTGAGGAAATGCGTAATCTC  
GTTGGCCGCTTGTGTTATGATTCACAGCATTATTTATGCTATTGATATCAATCATTTGGGCTTTCTGTAATACATGGAACTGACATTAG  
TCTCGATGGCAACTGGGCCAGTTATATACGCTGTACCAAAAACGTTCAATCGCGTGAGTGGAAAATGGGAAAACAAGTGCAACTACGCCCTCTGA  
AATGACCACTGGCATATTTTCAGAGACTTTCTCCAACATCAAAGTGGTTCCGGGCTTTTACTCTGGAACCTTACTTTGAGACAAAACACACAAA  
GCTACAGAAGAACTTTATAAAGTTGGACTAATACGAGCAAACCTACTCGGGATTGCTGTGGGGATTGACAGATGCGATGTCATTCCTTCATCACTG  
CAACTATCTTTTATTATGCCACGCTTCTCATTACCAAGAGAGAGATCAGTATCGCGACTGCACTACAGACTGTCAATCTTCTATTTATTTGGTAT  
TTCTAATAGTACGAATATGCTGGCCATGATACCACAAAATCAAATCTTCTCGCGTTACAGCTACGCATATGCTTGTATTAGCCAATCTCGATTCA  
TCTTCTCCCACGAAAATAAAGGAACCGAACGGCTTTTCGACAATCTTTCCAATCAAATTCACCGTCTCTCATTACATATCCTACTCGTCCTG  
AAAAACGAACGATATCATCTTTTCTCTTTCCCTGATTCTAACTCAACAACGCACTTGTGCGACCTCCGGCTCCGAAAATCTACAATAGC  
TGCTCTGCTCATTGGTCTTTATCCGCCAGATATTTCAACACCTCCACCGTTGACATTCAATCGCGTCTCCATAAGTAACGTGCACATTCCGCTC  
CTCCGGGCTTCTCTCTCACTCGTCCCACAAAATACCGATTCTATTTCCAGCTACCATTCTCCATAACATCATTTTATGGTCTCCCAGAATCTTCTC  
CTTGTGCTAGTCTTCCATCTGCTATTGCATCAGCAAAAGATGCTGGGATCCATGAATTTATCACATCGCTTCCACAAGGTTATGATACTATG

>Bcin05g07690(MLST2), partial sequence [organism=Botrytis cinerea, strain N11\_S\_E08]  
ACCCTATCACCAAGTCTTTTCTGCACTTTTCTCATCAAAAACGAACGAGAACATCATCAATAAATACTTTGCTGAAGTAATTGGGTTTTATT  
TTGGCCAGGATGCCTTCTCTCTACGACAGCAAGCCTTCGATGATATGTTGTGGTAGTTCTTGGCTGGCTGGATACTGTCAAATTCATTGATTT  
ACATTCTGAATTGCACTATTCAAACGACTCTCAGCCAGAAATGGTACGGACAACAATATAAACCTGCATTTGCACATCGAGCGGACTATTTTGG  
GAATTGGCTTCAACAAGGATGGGATACTACTCTCTGTGGTGGTGGGATGATATGGTCACCATACTTACTCCATAACAAGAACGAATTACCAATG  
AACTCTATATCGCAGCTTCGATATCGATGTACCTATATTTCCCCGGAGATGACAATCAATCCCCATTTATGCTTTCCAACCTTCATATCCACC  
TCACGATCCGAAATATCTACAGGCAGCTGTTGATGCTTACAAATGGCTGAATGGTTCCAACATGACGGATTTACAAGGATTATATGTCGACGGG  
TACCATATCTCGAATCTTTCTGGCGGTGAAAACACCCATTCGATTTAGAAAATGAGATGGTATATACTTACAATCAAGGTGTTTTGCTTACTG  
GACAACGTGGTTTTGTATGACGCAACC GCCGACGATCATACCTTGTAGATGGCCACAACTCATCGCGAATGTTATTAATGCCACAGGCTATGA  
CCTGAAACACAATGTTGTCATCTCACCGCCACCCAAAGATGGTTCCGCATTTGGCAAAGTGGTTTGGCTGGGTAGGAATGGAATACCTGGAAGAA  
GGATGCGATTCAGTGCTTCGTGTTCTCAAAAATGGACAAAATTTCAAAGGCATATTTCTTTTATCATTGATTGCGTTCGTAGTATTTGCCAG  
GGGAGCCTATTGCAGGGACGAAGGAAAAGCTTAGAACTCGACAGAGTGTGGCATTTCTGACAAAATGCTCACAGTATACAAAATG

>Bcin06g01710(MLST3), partial sequence [organism=Botrytis cinerea, strain N11\_S\_E08]  
GTGAGTCTGACTTTTGTATTTGAGCGTTAAGATAGACACTGATATACCAAGGCAATCACCTAATTTTATGCGCTTCTTCCCTGCATCATCTACC  
TACCCTGGAATGCTGGGAGAATTATACTCAGCAGCTTTTACAGCACCTGCTTTCAATTTGGATCTGTTCCCTTGCTGTGACAGAAATGGAGACGG  
TTGTAATGGATTGGCTGGCCAAGCTTCTCAATCTCCAGACTGTTATTTGTCTTCGACTCATGGTGGTGGTGTATCCAAGGATCAGCCTCGGA  
AGCTATCGTTACCGTTATGGTTGCTGCCCGGATAAAATATCTTCGTGAACTACTGAAGTCTGTGCGGCATTGAACTCGAGGATGCGATTGCA  
TATAAGAGGAGTAAGCTAGTTGCACTAGGAAGCGAAATGGCACACAGCTCCACGCGAAAAGCAGCGCAAATAGCTGGCGTTAGATTCCGATCGA  
TTCCAGTACTCGCATCCAATGATTTTCGCCATGACGGGTGATGATTTAGAGAAGGTATTGAAAGAATGCAAATCTCAAGGATTGGAACCTTCTA  
TCTAACTTCGACTTTGGGAACAACATCTACATGCGCAGTTGACGACTTCGCATCTATTGCAACAGTACTTTCAAAAATATGCACCTCCAGATGTT  
GCAGGCGAGATCTGGGTTACGTCGATGCTGCTTATGCAGGTGCAGCTTTGGTTTGGCCTGAATACCATCATCTAACATCGTCTTTCCAGCATT  
TCCATTCTTCGATATGAACATGCACAAAATGGCTTCTGACAAAATTTGACGCTTCTTGTCTATATGTCAGAAAACGCAAAGATCTGATCGATGC  
ACTGTCCATAACACCAAGTTATCTTCGCAACGAGTTTTCAGAGAGTGGACTCGTAACCGACTATCGGGACTGGCAAATTCCTCTCGGAAGACGC  
TTCCGAAGCTTAAAGATTTGGTTTGTCTCAGAACCCTACG

>Bcin09g03030(MLST4), partial sequence [organism=Botrytis cinerea, strain N11\_S\_E08]  
CGACCTTCAACCCACCGCAGCTCCTATACCGAAAGCGAGTATCCTACCAATTCCTTCCACCTGCGACTTTAAGACCATTGGCTTTCCGCA  
CTTTCAAAAAAGCATAGTTTAAACATTCAGCTCGTCGGCATTACAAGTGTGGCTACTTTTATTTGGAAAGCATTGTGGGACAGGATGGAGGGA  
AGAAGGACTGGCAGAGAGAGTCTTGGAGGAGGTGCGCAAGAGTTGGAAGAATAGGAGTGGCGGTGTCAATTTGTCGAGGGCGAGGGAACGGAATTG  
AAGGAGATTCTGAAAGCTTTGGAAGGGAATATGAGTGGTGGAAAGGATAGTCAATAGGAAGAGAGCTAAGCCGACAGAATAGTTTAGTACTGGGAT  
CATCACAATATGGAGAGGTCAATCATAACAAGACTTGGGCTACGGCCAGGGAATATACCCAGAGAGGATAGTCAAGTGTGGGAATGTCAAC  
GTTGGAGGTCAATGACGAGGAAGATGAGGATGGCCTGATGGATCCAAGAAGTGGTTAAAAGTCAATGATGCAATTTGAGCAACCTCGACTGGTG  
TACAATGTTGCTAAAAAGCACTTTGATAGGTATGTTTCAATGATAAAAATTTTATCTGAATCGACTAACCTCAGTACAGAGATACCTCCAAACCTT  
CATTGTTCCACCTGCGTCTCATAAAAACCTCCTCTTCCAAAACCGCTATAATGTTATCCATCAACGTCTCCTTCGCAATGAATCTTTTCAAAC  
GCCCCTTTTCAAGGTGGCAAATCTTCCCTTCAACGCGACGCTCCGCCATTACCACACAACAACAATCATACAAATTAACGCCGATAGCTAAT  
CTTCTCGGTGCGAATCGCAGCTCTCATATGCTTCTCGGTCTCCTCAGTATTTCAACCACTGGTACCCTCGCCATCAATGACCTGACGGGCAGTA  
TCGCTCTCGATCTTACACACGCGCAGCAGCCATTCC

>Bcin11g01310(MLST5), partial sequence [organism=Botrytis cinerea, strain N11\_S\_E08]

```
ACTGACATGGACCTCATGTGGAACCGGCGTAGAATGCGCAACGCTTGAAGTTCCGCTCGAATATGGCGATGCAACGTCAACGGCAAAGCCAGT
GTTGCGCTTGCTCGTTATCCTGCCACTGTTGCCGCGAGCAAGAAGCTCGGGTCTCTCTTGATAAACCCCGGTGGACCCGGTGCCTCTGGTGTG
GCTTTGTGAGTCTGGAGCCGGTGCCGCCGTCTCGACACTGAGTGGTGGATTGTACGATATCATCGGATGGGATCCACGTGGAACCCGGTGCCTC
GGCTCCTATTTTTGGAATGTTTTGCAAATGCCAGTGCAGGAGTATGATTTTAAACAACGCGTTTCCATCTGCTCCGAATCTCTGGCTCGGACAATTT
GCGAATGCCAGCGCAAATTTCTGCTGTTAGTCTGCTATCACATCCTTTGACACTTCTGTGCTGCTCTTGCAAAAAGCTTGCCTGGCTCAGAAAT
CTCCCGCTCTTTACACCTCAACAGCAGCATATGTTGCTCGAGACATGGCAGCGATAGTCGATGCATTGGATGGGACCTCTGCAAACTTAACATA
CTGGGGTTTCTCATATGGAACATCTTCCCTAGCTGAGTTTATCCAACTTTCCCAAGCCGCGTGGGAAGAGTTCTTGCCGATGGTGTTCGCAC
GCAAAGGCAAATGCACTCACATACGTTAGCCAACCTTCCCAACGATCAACTCAGTGTTCGTGCTTCGTTGAACGATTTTGCAGCTTTCTGCACCA
CCGCCGGTAGTAAAGGTTGCTCTTTTGCACCGCCCTACTGGAACCACAGGTAAGTGTGCTACCAGACTGGACAACATAATGAAGGATATGTT
CCTCAATCCTATTGTTGCTTCGGGCTTAAGCATCA
```

>Bcin15g03910 (MLST6), partial sequence [organism=Botrytis cinerea, strain N11\_S\_E08]

```
GCCAAAACACAAAATCATCCAACGATGAAGATGATACTCCACTTCCCTTGATTATTTGGCATGGACTCGGCGATAATTACAAAGCGGATGGTCT
TGCGCAAGTTGGAAAAGTAGCTGAAGCTATTCATCCTGGGACTTTTGTCTACAATATTCATGTAGATGAGGATGCATCTGCAGATAGGACAGCT
ACCTTCTTTGGAAAATCTCACTCGTGAGTACATCCCTATTTTTCCCTTTAAATACCATACTAACTCTCTTACCAAGTTCAAATCGAAAAGGTCTG
CGAAGACCTCGCCTCCCATCCTATTCTCTCTACCGCGCCCGCGTGCAGCAATTGGATTCTCCCAAGGCGCCAATTCTTGCGCGGTTACATA
TCCCGCTGCAATGCTCCACCCATCCGCTCTCTCTGACCTTCGGTTCCCAACACAACGGCATTCTGCTTCCAAGCCTGTGGTCCGCGGAT
TCCTCTGTGCGGGTGTCAAACCCCTTTTGCAGTCCAACACCTGGTCAACCTTTGTCCAATCTCGTCTCGTACCCGCTCAATACTTCAGAGATCC
GGAAAACCTAGACTCTTACCTTGAATATTTCAATTTCTTGGCGACATCAATAATGAGCGGCTTCTCAAGAACCAAACATATAAATCCAACATG
GAAAAATTGGAACGATTTCGTAATGTATGCTTTGAAAGCAGATACAACTGTATCCCTAAGGAAAGTGGATGGTGGGCTGAAGTCAACGGCACGG
AAGTTACACCCTGAAAGAAAGAGCCATTTATAAAGAAAGATTGGCTAGGTTTAAAGACATTGGATGAGGCCGAAAATTAGTTTTTCGAAACCAT
TCCAGGGGGACATATGACGTTAGGAGAGGAGATGCTAGAGAAGGCTTTCAAAGAGTATTTTGGTCCAGCAGGGAAGAAAATTTGGGG
```

>Bcin16g03460 (MLST7), partial sequence [organism=Botrytis cinerea, strain N11\_S\_E08]

```
ATGAACCTCTTGATTTGAACTCTTCATTAATTCGAAGTGATGAACCCCTATTTCTGCCAGAGGATAGTTACAAGACGTATATCATTAGTCGAGA
ACCCTCATGATATATATTGACGGGTTTTTGGAAAAGCAATGAAAAGTAAACATTTGGTTGATGTTAGGTGTGTTATTTATTTCTGATGAAATGAAC
AAGAGAGACTGATGAGATAGTGAGCCGCTTTATGAACCGTCAACTGTTTCTCACGGACAGGAAGTTACCATTGATCCTTCAGTTCGGAATTCCTG
AAGTGGCGGTTTTAGAGAGGGATGAGGTGGTCAAGGTGATTTGAGCATAGAGCGAGGGCATTTCAGGGGTGGAGGGGCGAGATGGGGATTGAGAA
GTTGAGGACGCAGAGGTATGGGGTTGGAGGACATTTATGGGATGCATTTGTAAGTTTTGGGGGATTGACGAAGGCTTCTGTCTATTTTCTATCAG
CACGGATCTTGAAAAGAAAAGATAGCATGAACACCGGGCTAATAACTAGGAAATAGCGATTGGAGCGGAGGTAACCTGGCATAGACCGATTTAG
TACTTTTCATGGTCTATGTCGACGATCCTCTGATATCGAAGTGGAGGAACGGAATTTCCACGTATCGTGGGACAAAAGGAGGAAGGTGGGAG
GACTTCTTGAAAACCTACGGAAGCATTTGGATCCAAGAAGTGGAGAAAATGTAACAGTAGAAGGGGTGACATTCAAACCAATCAAGGGAAATGCCG
TATTCTGGGAAAATACTGACAACAACGGGAGGGGCTATGAT
```

>Bcin12g03020 (MLST8), partial sequence [organism=Botrytis cinerea, strain N11\_S\_E08]

```
CGATTGGCTGCGAAGAAAAGTAGCGCAGCACCAGTACCCAAAAGCAGCAATAAACCATCGGCAAGGGAAAATATTTCTCTGAACCACAACATGACA
CGAGCGCGGAAGAGTATATCGGGCGAGAAGCTTCATCAAGAGCACCAAAGCGACAACGAGTCGATGATAATTATAACTCTTACGGTGGAAAGAAA
TGAAAATACAGCAGCTTATGCTTCCGGGAAACTTCCATCTGGAAGTATAAATGTTGGTGGAGGTAGGAAGACCCTTTTCAAGAAGAACCCTCGA
ACGGCATTGTGCTGCGCAAGTTGCCCTTGGAGTATCAACATTTGGTGGAAAGAGGCTACCCAAATCGAGGACGAGGGTAGAGCAGCTTATG
CTTCCGGAAAATTTGCCCCAGGAAGTATAAACTCTGGCGCAAAGAAGGCGATTTCAATCCAAGATGAAACGAGACCCGGCTTATGCTCTCCGAAA
GCTTCCACATGGTAGTATCGACGGTATGCGAAAACCGTGAAATGGCTGCCGTCCACCGCGAAAATGCTGAGGGTGGGAGGAAACCAGGCCAGGTT
GTCTCTTCTCTATTACATTCATCTACTTCAAAGAAAACCTTTGATGAACCAGAAGAACAAGCGGAACCGGCAAACCATCCAATGCGCCTT
TGACAGAGGAAAATGGCGACTTTACCAATCTAGGGCTATCGAGAAGGCTTGCAGCCCATCTATCGACTAACTCGATATGAAAGCCCCGACGGC
CATTCAAAAAGCATCTGTGCAGCAGTTGGTATCGGACGATAGCGATGCTTTCATACAAGCAGAGACTGGATCTGGAAAACCTTTGGCATATCTA
CTACCTATAGTCGAGCGAATATTAGCATTGAGTGAGAATGGCGTACAAATA
```

>Bcin02g07770 (MLST9), partial sequence [organism=Botrytis cinerea, strain N11\_S\_E08]

```
CAGCTTTCCCTTTCCGGTCTTGGCATCTACAGTCATTGCCATCCCTACACCATCACAACTTGAGTCTCGGGCCGTTATCGATTCCGATGCCGTTG
TAGGATTTGCCGAAACTGTTCCAGTGGGACCGTAGGAACAGTTTATGAGGCATATAAACCATTCCTTAAAGTCGTAAATGGATGCGTACCATT
CCCTGCCGTCGATGCATCGGGTAACACAGGGTATGTCTTATATCTTTCTCTTCCACACGATTGCTATTTAGTCTCTAACATATTTTAGTGGTG
GTTTGTACCAACTGGCAGTAGCAATGGTGGTTGCAGCAGCAGTACCGGTCAAGTATATGTTTCGAGGAGGACAAAGCGGATCAAACCTACGCCAT
CATGTACTCCTGGTAAAGTCTCTCTTAACTTCTCCTTATAGATCCAACCTAACAAAATCTTAGGTACATGCCAAAGGACGAGCCCTCAACCGGT
ATTGGTCAACGTCACGATTGGGAAGGTGTAATTTGCTGGCTCTCCAGCGCCACCGCCACAACCTGCCGACAACATCTTAGCCGTTTGTCTTCCG
CCCACGGAGGCTGGGATTTGTTCCACGGATGGCTATTTCCCTTTCTGGTACCAGCCCTCTTATCAAGTACGAAAGTATCTGGCCCGTCGATCACTC
AATGGGTCTTACTAGTACTGTTGGTGGAAAACAACCTATGATTGCTTGGGAGTCTTTACCAACTGCTGCTCAAACCTGCTCTTGAGAACACCGAT
TTCGGTGTGCGAATGTTCCATTCAATTCGGCTGTTTTTCACAGACAATCT
```

>Bcin04g02090 (MLST10), partial sequence [organism=Botrytis cinerea, strain N11\_S\_E08]  
CGGAGGATGATATGGCAAAGTCTATGATTACCAAAGCATTTGTAGGCATGAGTAGTAACTGTCGAATATGACTATGAATGATGTTTACAAGCC  
CTACATCCATGTAAGAAAATGTAGAATAGAGAGATCAGTAACTGGAACATAATATCGTTTTGTAGGCTTTCAAGTTACTTACGCAGTTCAACCCAAT  
CACTACAGCTATTGCCGAATCCCCACTGTTTCAAATGGCCGTCTCAGCAAATACCATCGAAAAGTACACACTGCTAGGCCCTTTCTTCAGAATA  
TCTCCTCTGCAACAGGAAGTTACCAGGGAATACTTCACTGCGCCAAAGACGATAGATAGGCGACACATTGCCACATCTCAAGATGCGTTACGAT  
TGACCTTACAAACCCATCAAAAAGATTTACTTGTATATCATCAACCCTTTGTTTCGAGCAAGTCCAATCGAAAAAGCAAACCCCTGGATTGGTT  
CGCTACATTGTGAATCAAAAATCACAAGCGTCGAGCACTTCAGGTAGACCCGAAAAGAGTGTCTTCTGATGGCTTTATGCACAATGTCACCTGTC  
GTTCTAGATGGTCTTTGTGAGCCATTTCATGGATACCACATTTCTCGAAAATTTGGAAGATTGATATTGATTATCTAAGACGTGCGCCTCGTGTAG  
ATATCAAGGACGAGACCAAGTTGAACGCTGACGAGAAGGCTTCTGAGAAGTATTATGAGGACACTGTTCTGGCACCTTCTAATTTTCATCTCTGA  
GGTCTTCTTTCTCACATTGGCTGCTCATATTATGGTAGTGAAGCTCTTAATGCCACGCATAAGAGTCTGGAGAAAAGACATCAAATATATTTCAA  
AAGCAATTGACTGCCGTTGAAGCA

Bcin01g07220 (MLST1), partial sequence [organism=Botrytis cinerea, strain N11\_S\_E09]  
ATGGCATATCTTGTCTTTCTTTTCGCATTATGCTTTGGAACGTGCTGGGCAAGCTTGGGTTAGTGCTCTGCGTGTAGAAGCACTAAAGAAGATTCT  
CGCACAAACCGAAGTCATGGTTTTGAGGAAATCCAGGAAATTCACCTAGCCGGTTGAACGAAAGTTTTGGATAGGAACTCTGAGGAAATGCGTAATCTC  
GTTGGCCGCTTTGCTGGTATTGTATTACAGCATTTTTTATGCTATTGATATCAATCATTGGGCTTTCTGTAATACATGGAAACTGACATTAG  
TCTCAATGGCAACTGGCCAGTTATATACGCTGTCACCAAAACGTTCAATCGCGTGAGTGGAAAATGGGAAAACAAGTGCACACTACGCATCTGA  
AATGACCACTGGCATATTTTCAGAGACTTTCTCCAACATCAAAGTGGTTTCGGGCTTTTACTCTGGAACTTACTTTGAGACAAAACACACCAAA  
GCTACAGAAGAACTCTATAAAGTTGGACTAATACGAGCAAACACTACTCGGGATTGCTGTGGGGATTGACAGATGCGATGTCATTCTTCATCACTG  
CAACTATCTTTTATTATGCCACGGTCTCATTTACCAAGAGAGAGATCAGTATTGCGACTGCACTACAGACTGTCAATCTTCTATTATTTGGTAT  
TTCTAATAGTACGAATATGCTGGCTATGATACCACAAATCAACTCTTCTCGCATTACAGTACGCATATGCTTGCATTAGCCAATCTCGATTCA  
TCTTCTCCCACGAAAAATAAAGGAACTGAACGGCTTTTCGACAATCTTTCCAATCAAATTCACCCGCTTTTCATTACATAACCTACTCGTCTG  
AAAAACGAACGATATCATCTTTTCTCTTTCCCTGATTCTTAACCACTGCACTTGTGCGACCTCCGGCTCCGAAAATCTACAATAGC  
TGCTCTGCTCATTGGTCTCTATCTCCAGATACTTCAACACCTCCACCGTTGACATTCAATCGCGTCTCCATAAGTAACTGTACATTTCCGTCT  
CTCCGGGCTTCTCTCTCACTCGTCCCACAAATACCGATTCTATTTCCAGCTACCATTCTCCATAACATCATTTATGGTCTCCCAGAATCTTCTC  
CTTGTGCTAGTCTTCCATCTGCTATTGCATCAGCAAAGATGCTGGGATCCATGAATTTATCACATCGCTTCCACAAGGTTATGGTACTAT

>Bcin05g07690 (MLST2), partial sequence [organism=Botrytis cinerea, strain N11\_S\_E09]  
ACCACTATCACCAAGTCTTTTCTGCACTTTCTCTCATCAAAAACGAACGAGAACATCATCAATAAATACTTTGCTGAAGTAATGGGTTTTATT  
TTGGCCAGGATGCCCTTCTCTCTACGACAGCAAGCCTTCGATGATATGTTGTGGGTAGTTCTTGGCTGGCTGGATACTGTCAAATTCATTGATTT  
ACATTCTGAATTACACTATTCAAACGACTCTCAGCCAGAAATGGTACGGACAACAATATAAACCTGCATTTGCACATCGAGCGGACTATTTTGG  
GAATTGGCTTCAAAAGGATGGGATACTACTCTCTGTGGTGGTGGGATGATATGGTCACCATAACCTTACTCCATAACAAGAACGCAATTACCAATG  
AACTCTATATCGCAGCTTCGATATCAATGTACCTCTATTTCCCCGGAGATGACAATCAATCCCCATTTATGCTTTCCAACCCCTTCATATCCACC  
TCACGATCCGAAATATCTACAGGCAGCTGTTGATGCTTACAAATGGCTGAATGGTTCCAACATGACGGATTTACAAGGATTATATGTCGACGGG  
TACCATATCTCGAATCTTTCTGGCGGTGAAAACACCCATTGCGATTCTAGAAATGAGATGGTATATACTTACAATCAAGGTGTTTTGCTTACTG  
GACAACGTGGTTTTGTATGACGCAACCGCCGACGATCATACCTTGTAGATGGCCACAACTCATCGCGAATGTTATTAATGCCACAGGCTATGA  
CCTGAAAACACAATGTTGTCATCTCACCGCCACCCAAAAGATGGTTCCGCATTGGCAAAGTGGTTTTGGCTGGGTAGGAATGGAATACTGGAAGAA  
GGATGCGATTCAAGTCTTCTGTTCTCAAATGGACAACTTTCAAAGGCATATTTCTTACCACCTTGATTGCGTCTCTGTAGTGATTTGCCAG  
GGGAGCCTATTGCAGGGACGAAGGAAGGCTTAGAACTCGACAGAGTGTGGCATTCTGACAAAATGCTCACAGTATACAAAAT

>Bcin06g01710 (MLST3), partial sequence [organism=Botrytis cinerea, strain N11\_S\_E09]  
TGGTGAAGTCTGACTTTTGTATTTGAGCGTTAAGATAGACTCTGATATACCAAGGCAATCACCTAATTTTCATGGCGTCTTCCCTGCATCATCTA  
CCTACCCTGGAATGCTGGGAGAATTATACTCAGCAGCTTTTACAGCTCCTGCTTTCAATTGGATCTGTTCCCTGCTGTGACAGAATTGGAGAC  
GGTTGTAATGGATTGGTTGGCCAAGCTTCTCAATCTCCAGACTGTTATTTGTGCTGACTCATGGTGGTGGTGTATCCAAGGATCAGCCTCG  
GAAGCTATCGTTACCGTTATGGTTGCTGCCCGGATAAGTATCTTCGTGAAACCACTGAAGTCTGTCGGAATTGAACTCGAGGATGCGATTG  
CATATAAGAGGAGTAAGCTAGTTGCACTAGGAAGCGAAATGGCACACAGCTCCACGCAGAAAAGCAGCGCAGATAGCTGGCGTTAGATTCCGATC  
GATTCCAGTACTCGCATCCAATGATTTTCGCCATGACGGGTGATGATTTAGAGAAGGTATTGAAAAGAAATGCAAATCTCAAGGATTGGAACCCCTC  
TATCTAACTTCGACGTTGGGAACAACATCTACATGCGCAGTTGACGACTTCGCATCTATTGCAACAGTACTTTCAAATATGCACCTCCAGATG  
TTGCAGGCGAGATCTGGGTTACGTCGATGCTGCTTATGCAGGTGCAGCTTTGGTTTGGCCTGAATACCATCATCTAACATCGTCTTCCAGCA  
TTTCCATTCTTTGATATGAACATGCACAAATGGCTTCTGACAAATTTGACGCTTCTTGCCTATATGTCAAGAAAACGCAAAGATCTGATCGAT  
GCACTCTCCATAACACCAAGTTATCTTCGCAACGAGTTTTTCAGAGAGTGGACTCGTAACCGACTATCGGGACTGGCAAATTTCTCTCGGAAGAC  
GCTTCCGAAGCTTAAAGATTTGGTTTGTCTCAGAACCCTAC

>Bcin09g03030 (MLST4), partial sequence [organism=Botrytis cinerea, strain N11\_S\_E09]  
ACCCTTCAACCCACCGCAGCTCCTATACCGAAAAGCGAGTATCCTACCAATTTCTCCTTCCACCTGCGACTTTAAGACCATTTGGCTTTTTCGCACT  
TTCACAAAAAAGCATAGTTTAAACATTGACGTCGTGGCATTACAAGTGTGGCTACTTTTTATTGGAAAGCATTTGTGGGACAGGATGGAGGGAGG  
AAGGACTGGCAGAGAGAGTCTTGGAGGAGTGCCTAAGAGTTGGAAGAATAGGAGTGGCGGTGTCATTGTGCGAGGGCGAGGGAACGGAATTGAA

```
GGAGATTCTGAAAGCTTTGGAAGGGAATATGAGTGGTGAAGGATAGTTCATAGGAAGAGAGCTAAGCCGGCAGAATAGTTTAGTACTGGGATCA
TCACAATATGGAGAGGTCAATCATAACAAGACTTGGGCTACGGCCAGGGAATATACCCAGAGAGGATAGTCAAGTTTGGGAATGTCAACGT
TGGAGGTCAATGACGAGGAAGATGAGGATGGCCTGATGGATCCAAGAAGGTGGTTAAAAAGTCGTTGATGCATTTGAGCAACCTCGACTGGTGTGA
CAATGTTGCTAAAAAGCACTTTGATAGGTATGTTTCAATGATAAAAAATTTATCTGAATCGACTAACTCAGTACAGAGATACCTCCAAACCTTCA
TTGTTCCCACCTGCGTCTCATAAAACACTCCTCTTCCAAAACCGCTATAATGTTATCCATCAACGTCTCCTTCGCAATGAATCTTTTCAAACGC
CCGCTTTTCAAGGTGGCAAATCTTCCCTTCAACGCAGCAGCTCCGCCATTACCACCAACAACAATCATACAAATTAACGCCGATAGCTAATCT
TCTCGGTGCGCAATCACAGCTCTCATATGCTTCTCGGTCTCCTCAGTATTTACCCCACTGGTACCCCTCGCCATCAATGACCTGACGGGCAGTATC
GCTCTTGATCTTACACACGCAGCAGCCATTC
```

```
>Bcin11g01310 (MLST5), partial sequence [organism=Botrytis cinerea, strain N11_S_E09]
ACTGACATGGACCTCATGTGGAACCGGCGTAGAATGCGCAACGCTTGAAGTTCGCTCGAATATGGCGATGCAACGTCAACGGCAAAGCCAGT
GTTGCGCTTGCTCGTTATCCTGCCACTGTTGCCGCGAGCAAGAAGCTCGGTCTCTCTTGATAAAATCCCGGTGGACCCGGTGCCTCTGGTGTG
GCTTTGTGCAGTCTGGAGCCGGTGCCCGCTCTCGACACTGAGTGGTGGATTATACGATATCATCGGATGGGATCCACGTGGAACCGGTGCTTC
GGCTCCTATTTTGGAAATGTTTTGCAAATGCCAGTGGGAGTATGATTTTAAACAACGCGTTTCCATCTGCTCCGAATCTCTGGCTCGGACAATTT
GCGAATGCCAGCGCAAATTTCTGCTGTTAGCTCTGCTATCACATCCTTTGACACTTCTGTGCTGCTCTTGCAAAAAGCTTGGCTGGCTCAGAAAT
CTCCCGCTCTTTACACCTCAACAGCAGCATATGTTGCTCGAGACATGGCAGCGATAGTCGATGCATTTGGATGGGACCTCTGCAAAACTTAACATA
CTGGGGTTTCTCATATGGAACATCTTCCCTAGCTGAGTTTATCCAACTTTCCAGGCCGCTGGGAAGAGTTCTTGCCGATGGTGTTCGAC
GCAAAGGCAAATGCACTCACATACGTTAGCCAACTTCCCAACGGTCAACTCAGTGTTCGTGCTTCGTTGAACGATTTTGCAGCTTTCTGCACCA
CCGCCGGTAGTAAAGGTTGCTCTTTTGCACCCGCCCTACTGGAACCTCAGGTAAGTGTGCTACCAGACTGGACAACATAATGAAGGATATGTT
CCTCAATCCTATTGTTGCTTCGGGCTTGAGCATCA
```

```
>Bcin15g03910 (MLST6), partial sequence [organism=Botrytis cinerea, strain N11_S_E09]
GCCAAAACACAAAATCATCCAACGATGAAGATGATACTCCACTTCCCTTGATTATCTGGCATGGACTCGGCGATAATTACAAAGCGGATGGTCT
TGCGCAAGTTGAAAACCTAGCTGAAGCTATTCATCCTGGGACTTTTGTCTATAATATTCATGTAGATGAGGATGCATCTGCAGATAGGACAGCT
ACCTTCTTTGGAAATCTCACTCGTGAGTACATCCCTATTTTCCCTTAAATACCATACTAACTCTCTTACCAAGTTCAAATCGAAAAGGTCGTG
CGAAGACCTCGCCTCCCATCCTATTCTCTTACCAGCCCGCCGCTCGACGCAATTTGGATTCTCCCAAGGCGGCCAATTTCTTGCGCGGTTACATA
TCCCCTGCAATGCTCCACCCATCCGCTCTCTCCTGACCTTCGGTTCCCAACACAACGGCATTTCTGCCTTCCAAGCCTGTGGTCCCGGATTT
TCCTCTGTGCGGGTGTCAAACCTTTTGCATCCAACACCTGGTCAACCTTTTGTCCAATCTCGTCTCGTACCTGCTCAATACTTTCAGAGATCC
GGAAAACCTAGACTCTTACCTTGAATATTTCAATTTCTTGGCGACATCAATAATGAGCGGCTTCTCAAGAACCACAAACATATAAATCCAACATG
GAAAAATTGGAACGATTCGTAATGTATGCTTTGAAGACGATACAACCTGTCATCCCTAAGGAAAGTGGATGGTGGGCTGAAGTCAATGGCAGCGGA
AGTTACACCACTGAAAGAAAGAGCCATTTATAAAGAAGATTGGCTAGGGTTAAAGACATTTGGATGAGGCCGAAAAATTAGTTTTCGAAACCATT
CCAGGGGGACATATGACGTTAGGAGAGGAGATGCTAGAGAAGGCTTTCAAAGAGTACTTTGGTCCAGCAGGGAAGAAATTTGGG
```

```
>Bcin16g03460 (MLST7), partial sequence [organism=Botrytis cinerea, strain N11_S_E09]
CATGAACCTCTTAATTTGAACTCTTCATTAATGCAAGTGATGAGCCCTATTCTGCCAGAGGATAGCTACAAGACGTATATCATTAGTTCGAG
AACCCTCATGATATACATTTGACGGATTTTTGAAAAGCGAATGAAAGTAAACACTTGGTTGATGTTAGGTGTGTTATTTATTTCTGATGAAATGAA
CAAGAGAGACTGATGAGATAGTGAACCGCTTTATGAACCGTCTACTGTTTCTCACGGACAGGAAGTTACCATTGATCCTTCGGTTCGAAATTTCT
GAAGTGGCGGTTTTAGAGAGGGATGAGGTGGTCAAGTGTATTGAGCATAGAGCGAGGGCATTTTCAGGGGTGGAGGGACGAGATGGGGATTGAGA
AGCTGAGGACGCAGAGGTATGGGGTTGGAGGACATTTATGGGATGCATTTGTAAGTTTTGGGGGATGACGAAGGCTTCTGTCTATTTTCTATCA
GTGCGGATCTTGAAGAAAAGATAGCATGAATACGAGGGCTAATAACTAGGAAATAGCGATTTGGAGCGGAGGTAAACGTGGCATAGACCGATTTA
GTACTTTTCATGGTCTATGTCGACGTATCCTCTGATATCGAAGGTGGAGGAACGGAATTTCCACGTATTTGTTGGGACCAAAGGAGGAAGGTGGGA
GGACTTCTGAAAACCTACGGAAGCATTTGGATCCAAGAACTGGAGAAAAATGTAACAGTAGAAGGGGTGACATTTCAAACCAATCAAGGGAATGCC
GTATTCTGGGAAAATACTGACAACAACGGGAGGGGCTATGATG
```

```
>Bcin12g03020 (MLST8), partial sequence [organism=Botrytis cinerea, strain N11_S_E09]
TCGATTGGCTGCGAAGAAAACCTGCGCAGCACCGAGTACCCAAAAGCACGAATAAACCATCGGCAAGGGAAAATATTCTCTGAACCACAACATGAC
ACGAGCGCGGAAGAGTATATCGGGCGAGAAGCTTCATCAAGAGCACCAAAGCGACAACGAGTCGATGATAATTTATAACTCTTACGGTGGAAAGAA
ATGAGAATACAGCAGCTTATGCTTCCGGGAAAACCTCCATCTGGAAGTATAAATGTTGGTGGAGGTAGGAAGACCCTTTTCAAGAAGAACCCTCG
AACGGCATTTGTGCTGCTGGCAAGTTGCCCTTGAAGTATCAACATTTGGTGGAAAAGAAGGCTACCCAAATCGAGGACGAGGGTAGAGCAGCTTAT
GCTTCCGAAAATTTGCCCCAGGAAGTATAAACTCTGGCGCAAAGAAGGCGATTTCACTCCAAGATGAAACGAGACCGGCTTATGTCTCTGGAA
AGCTTCCACATGGTAGTATGGACGGTATGCGAAAACCGTGAATGCTGCGCTCCACCGCGAAAATTTGCTGAGGGTGGGAGGAAACCAGGCCAGGT
TGCTCTTCTCTATTTACATTTCAATCCTACTTCAAAGAAAACCTTTCGATGAACCCGAAGAACAAGCGGAACCGGCAAAACCATCCAATGCACCT
TTGACAGAGGAAATGGCGACTTTCACCAATCTAGGGTTATCGAGAAGGCTTGCAGCCATCTATCGACTAAACTCGATATGAAAGCCCCGACCG
CCATTTCAAAGCATCTGTGACAGCTTGGTATCGGACGATAGCGATGCTTTTACATAAAGCAGAGACTGGATCTGGAAAAACCTTTGGCATATCT
ACTACCTATAGTCGAGCGAATATTTAGCATTTGAGTGAGAAATGGCGTACAAAAT
```

```
>Bcin02g07770 (MLST9), partial sequence [organism=Botrytis cinerea, strain N11_S_E09]
```

```
ACAGCTTTCCCTTTTCGGTCTTTGGCATCTACAGTCATTTGCCATCCCTACACCATCACAACCTTGAGTCTCGGGCCGTTATCGATTCCGATGCCGTT
GTAGGATTTGCCGAAACTGTTCCAGTGGGACCGTAGGAACAGTTTATGAGGCATATAAACCATTCCTTAAAGTCGTAAATGGATGCGTACCAT
TCCCTGCCGTCGATGCATCGGGTAACACAGGGTATGTCTTATACCATTCTCTTCCACACGATTGCTATTGAGTCTCTAACATATTTTTAGTGGT
GGTTTGTACCAACTGGCAGTAGCAATGGTGGTTGCAGCAGCAGTACCCGGTCAAGTATATGTTTCGAGGAGGACAAAGCGGATCAAACCTACGCCA
TCATGTACTCCTGGTAAGTTCTCTCTAAACTTCTCCTTATAGATCCAACCTAACAAAATCTTAGGTACATGCCAAAGGACGAGCCCTCAACCGG
TATTGGTCACCGTCACGATTGGGAAGGTGTAATTGTCTGGCTCTCAAGCGCCACCGCCACAACCTGCCGACAACATCTTAGCCGTTTGTCTTCC
GCCACGGAGGCTGGGATTGTTCCACCGATGGCTATTCCTTCTTGGTACCAGCCCTCTTATCAAGTACGAAAGTATCTGGCCCGTCGATCATT
CAATGGGTCTTACTAGTACTGTTGGTGGAAAACAACCTATGATTGCTTGGGAGTCTTTACCAACTGCTGCTCAAACCTGCTCTTGAGAACACCGA
TTTCGGTGCTGCGAATGTTCCATTTCATTCGGCTGTTTTACAGATAATCT
```

>Bcin04g02090 (MLST10), partial sequence [organism=Botrytis cinerea, strain N11\_S\_E09]

```
CGGAGGATGATATGGCAAAGTCTATGATTACCAAAGCATTTGTAGGCATGAGTAGTAAACTGTCGAATATGACTATGAATGATGTTTACAAGCC
CTACATCCATGTAAGAAATGTAGAATAGAGAGATCAGTAACTGGAATAATATCGTTTGCAGGCTTCAAGTTACTTACGCAGTTCAACCCAAT
CACTACAGCTATTGCCGAATCCCCTACTATTTCAAATGGCTGTCTCAGCAAATACCATCGAAAAGTACACACTGCTAGGCCCTTCTTTCAGAATA
TCTCCTCTGCAACAGGAAGTTACCAGGGAATACTTCAAGTGCGCCAAAAGACGATAGATAGGCGACACATTGCCACATCTCAAGATGCCCTTACGAT
TGACCTTACAAACCCATCAAAAAGATTTACTTGTATATCATCAACCACTTTGTTTCGAGCAAGTCCAATCGCCAAAAGCAAAACCCCTGGATTGGTT
CGCTACATTGTGAATCAAAATCACAAGCGTCGAGCACTTCAAGTAGACCCGAAAGAGTGTCTTCTGATGGTTTTATGCACAATGTCACGTGC
GTTCTAGATGGTCTTTGTGAGCCATTTCATGGATACCACATTTCTCAAAAATTTTCGAAGATTGATATTGATTATCTAAGACGTGCGCCCTCGTGTAG
ATATCAAGGACGAGACCAAGTTGAACGCTGATGAGAAGGCTTCTGAGAAGTATATGAGGACACTGTTTCTGGCACTTCTAATTTTCATCTCTGA
GGTCTTCTTCTGACATTGGCTGCTCATCATTTATGGTAGTGAAGCTCTTAATGCCACGCATAAGGGTCTGGAGAAAGACATCAAATATATTTCAA
AAGCAATTGACTGCCGTTGAAGCA
```

>Bcin01g07220 (MLST1), partial sequence [organism=Botrytis cinerea, strain Pepper]

```
ATGGCATATCTTGTCTTTTTCGATTATGCCTTGGAACTGCTGGACAAGCTTGGGTTAGTGTCTGCGTGTAGAAGCACTAAAGAAGATTCT
CGCGCAACCGAAGTCATGGTTTTGAGGAATCCAGGAATTCACCTGGCCGGTTGAACGAAGTTTTGGATAGGAACCTCGAGGAAATGCGTAATCTC
GTTGGCCGCTTTGCTGGTATTGTATTACACGATTTTTTTATGCTATTGATATCGATCATTGGGCTTTTCTGTAATACATGGAAACTGACATTAG
TCTCAATGGCAACTGGCCAGTTATATACGCTGTCACTAAAACGTTCAAGTGCCTGAGTGGAAAATGGGAAAACAAGTGAACCTACGCATCTGA
AATGACCACTGGCATATTTTCAGAGACTTCTCCAACATCAAAGTGGTTTCGGGCTTTTACTCTGGAACTTACTTTGAGACAAAACACACCAAA
GCTACAGAAGAACTCTATAAAGTTGGACTAATACGAGCAAACTACTCAGGATTGCTGTGGGGATTGACAGATGCGATGTCATTTCTACATCACTG
CAACTATCTTTTTATTATGCCACGGTCTCATTACCAAGAGAGAGATCAGTATCGCGACTGCAGTGCAGACTGTCAATCTTCTATTATTTGGTAT
TTCTAATAGTACGAATATGCTGGCCATGATACTACAAATCAACTCTTCTCGGTTACAGCTACGCATATGCTTGCATTAGCCAATCTCGATTCA
TCTTCTCCACGAAAATAAAGGAGCCGAACGGCTTTTCGACAATCTTTCCAATCAAATTCACAGTCTCTCATTTACATATCCTGCTCGTCCCTG
AAAAACGAACGATATCATCTTTTCTCTTTCCCTGATTCTAACTCAACAACTGCACTTGTCCGGACCCCTCCGGCTCCGAAAATCTACAATAGC
TGCTCTGCTCGTTGGTCTCTATCCGCCAGATACTTCAACACCTCCACCGTTGACATTCAATCGTGTCTCCATAAGTAACTGTCACATTCCGCTC
TCCGGGCTTCTCTCTCACTCGTCCACAAATACCGATTCTATTTCCAGTACCATTCTCCATAACATCATTTATGGTCTCCAGAATCCTCTC
CTTGTGCTAGTCTTCCATCTGCTATTGCATCAGCAAAAAGATGCTGGGATCCATGAATTTATCACATCGCTTCCAAAAGGTTATGATACTAT
```

>Bcin05g07690 (MLST2), partial sequence [organism=Botrytis cinerea, strain Pepper]

```
ACCACTATCACCAAGTCTTTTCTGCACTTTCCTCATCAAAAACGAACGAGAACATCATCAATAAATACTTTGCTGAAGTAATTGGGTTTTATT
TTGGCCAGGATGCCTTCTCTTACGACAGCAAGCCTTCGATGATATGTTGTGGGTAGTTCCTGGCTGGCTGGATACTGTCAAATTCATTGATTT
ACATTCTGAATTGCACTATTCAAACGACTCTCAGCCAGAATGGTACGGACAACAATATAAACCTGCATTTGCACATCGAGCGCGACTATTTTGG
GAATTGGCTTCAAAAGGATGGGATACTACTCTCTGTGGTGGTGGATGATATGGTACCATACTTACTCCATAACAAGACGCAATTACCAATGA
ACTCTATATCGCAGCTTCGATATCGATGTACCTATATTTCCCGGAGATGACAAATCAATCCCATTTATGCTTTTCAAACCTTTCATATCCACCT
CACGATCCGAAAATATCTACAGGCAGCTGTTGATGCTTACAAAATGGCTGAATGGTTCCAACATGACGGATTTACAAGGATTATATGTCGACGGGT
ACCATATCTCGAATCTTTCTGGCGGTGAAAACACCCATTGCGATTCTAGAAATGAGATGGTATATACCTACAATCAAGGTGTTTTGCTTACTGG
ACAACGTGGTTTTGTATGACGCAACCGCCGACGATCATACCTTGTAGATGGCCACAAACTCATCGGAATGTTATTAATGCCACAGGCTATGAC
CTGAAAACACAATGTTGTCATCTCACCGCCACCCAAAAGATGGTTCCGCATTTGGCAAAGTGGTTTTGGCTGGGTAGGAATGGAATACTGGAAGAAG
GATGCGATTCAAGTGTCTCGTGTCTCAAAAATGGACAACTTTCAAAGGCATATTTCTTTCATCACTTGATTGCGTTCTGTAGTATTTGCCAGG
GGAGCCTATTGCAGGGACGAAGGAAAGCTTAGAACTCGACAGAGTGTGGCATTCTGACAAATGCTCACAGTATACAAAAT
```

>Bcin06g01710 (MLST3), partial sequence [organism=Botrytis cinerea, strain Pepper]

```
GTGAGCCTGACTTTTGTATTTGAGCGTTAAGATAGACACTGATATACCAAGGCAATCACCTAATTTTCATGGCGTCTTCCCTGCATCATCTACC
TACCCTGGAATGCTGGGAGAATTATACTCAGCAGCTTTCACAGCACCTGCTTTCATTTGGATCTGTTCCCTGCTGTGACAGAATTGGAGACGG
TTGTAATGGATTGGCTGGCCAAGCTTCTCAATCTCCAGACTGTTATTTGTCTTCGACTCATGGTGGTGGTGTATCCAAGGATCAGCCTCGGA
AGCTATCGTTACCGTTATGGTTGCTGCCCGGATAAAATATCTTCGTGAAACTACTGAAGGTCTGTCCGGCATTTGAACTCGAGGATGCGATTGCA
TATAAGAGGAGTAAGCTAGTTGCACTAGGGAGCGAAATGGCACACAGCTCCACGCAGAAAGCAGCGCAAATAGCTGGCGTTAGACTCCGATCGA
TTCCAGTACTCGCATCCAATGATTTGCGCATGACGGGTGATGATTTAGAGAAGGTATTGAAAGAATGCAAATCTCAAGGATTGGAACCTTCTA
```

TCTAACTTCGACTTTGGGAACAACATCTACATGCGCAGTTGACGACTTCGCATCTATTGCAACAGTACTTTCAAATATGCACCTCCAGATGTT  
GCAGGCGAGATCTGGGTTACGTCGATGCTGCTTATGCAGGTGCAGCTTTGGTTTGGCCCTGAATACCATCATCTAACATCGTCCTTCCAGCATT  
TCCATTCCCTTCGACATGAACATGCACAAATGGCTTCTGACAAATTTGACGCTTCTTGTCATATATGTCAAGAAACGCAAAGATCTGATCGATGC  
ACTCTCCATAACACCAAGTTATCTTCGCAACGAGTTCAGAGAGTGGACTCGTAACCGACTATCGGGACTGGCAAATTCCTCTCGGAAGACGC  
TTCCGAAGCTTAAAGATTTGGTTTGTCTCAGAACCCTAC

>Bcin09g03030 (MLST4), partial sequence [organism=Botrytis cinerea, strain Pepper]  
ACCCTTCAACCCACCGCAGCTCCTATACC GAAAGCGAGTATCCTACCAATTCTCCTTCCACCGCGACTTTAAGACCATTGGCTTTCCGCACTT  
TCACAAAAAGCATAGTTTAAACATTGACGTCGTCGGCATTACAAGTGTGGCTACTTTTATTGGAAAGCATTGTGGGACAGGATGGAGGGAAGA  
AGGACTGGCAGAGAGAGTCTTGAGGAGGTCGCCAAGAGTTGGAAGAAATAGGAGTGGCGGTGTCAATTGTGCGAGGGCGAGGGAACGGAATTGAAG  
GAGATTCTGAAAAGCTTTGGAAGGGAATATGAGTGGTGGAAAGGATAGTCATAGGAAGAGAGCTAAGCCGACAGAATAGTTTAGTACTGGGATCAT  
CACAATATGGAGAGGTCAATCATAACAAGACTTGGGCTACGGCCAGGGAATATACCCAGAGAGGATAGTCAGTCAAGTTTGGGAATGTCAACGTT  
GGAGGTCAATGACGAGGAAGATGAGGATGGCTGATGGATCCAAGAAGTGGTTAAAAGTCAATTGATGCATTTGAGCAACCTCGACTGGTGTAC  
AATGTTGCTAAAAAGCACTTTGATAGGTATGTTTCAATGATAAAATTTTATCTGAATCGACTAACTCAGTACAGAGATACCTCCAAACCTTCAT  
TGTTCCACCTGCGTCTCATAAAAACTCCTCTTCCAAAACCCTATAATGTTTATCCATCAACGTCTCCTTCGCAATGAATCTTTTCAAACGCC  
CGCTTTTCAAGGTGGCAAATCTTCCCTTCAACGCAGCAGTCCGCCATTACCACACAACAACAATCATACAAATTAACGCCGATAGCTAATCTT  
CTCGGTGCAACCGCAGCTCTCATATGCTTCTCGGTCTCCTCAGTATTTACCCACTGGTACCCTCGCCATCAATGACCTGACGGGCAGTATCG  
CTCTCGATCTTACACACGCAGCAGCCATTC

>Bcin11g01310 (MLST5), partial sequence [organism=Botrytis cinerea, strain Pepper]  
ACTGACATGGACCTCATGTGGAACCGCGTAGAATGCGCAACGCTTGAAGTTCGCTCGAATATGGCGATGCAACGTCAACGGCAAAGCCAGT  
GTTGCGCTTGCTCGTTATCCTGCCACTGTTGCCGCGAGCAAGAAGCTCGGGTCTCTCTTGATAAAACCCCGGTGGACCCGGTGCCTCTGGTGTG  
GCTTTGTGACGCTTGAGCCGGTGCCCGCTCTCGACACTGAGTGGTGGATTGTACGATATCATCGGATGGGATCCACGTGGAACCGGTGCTTC  
GGCTCCTATTTTGAATGTTTTGCAAATGCCAGTGGGAGTATGATTTTAAACAACGCTTTCCATCTGCTCCGAATCTCTGGCTCGGACAATTG  
CGAATGCCAGCGCAAATTTCTGCCTGTTAGCTCTGCTATCACATCCTTTGACACTTCTGTGCTGCTCTTGCAAAAGCTTGGCTGGCTCAGAAAT  
CTCCCGCTCTTTACACCTCAACAGCAGCATATGTTGCTCGAGACATGGCAGCGATAGTCGATGCATTTGGATGGGACCTCTGCAAACTTAAC  
CTGGGGTTTCTCATATGGAACATTTTTCTTAGCTGAGTTTATCCAACTTTCCAGGCCGTGTGGGAAGAGTTTCTTGCCGATGGTGTTTTCGA  
CGAAAGGCAAATGCACTCACATACGTTAGCCAACTTCCCAACGATCAACTCAGTGTTCGTGCTTCGTTGAACGATTTTGCAGCTTTCTGCACC  
ACCGCCGGTAGTAAAGGTTGCTCTTTTGCCACCGCCCTACTGGAACCTCAGGTACTGTTGCTACCAGACTGGACAACATAATGAAGGATATGT  
TCCTCAATCCTATTGTTGCTTCGGGCTTAAAGCATCA

>Bcin15g03910 (MLST6), partial sequence [organism=Botrytis cinerea, strain Pepper]  
GCCAAAACACAAAATCATCCAACGATGAAGATGATACTCCACTTCCCTTGATTATCTGGCATGGGCTCGGCGATAAATTACAAAGCGGATGGTCT  
TGCGCAAGTTGGAACACTAGCTGAAGCTATTCATCCTGGGACTTTTGTCTACAATATTCATGTAGATGAGGATGCATCTGCAGATAGGACAGCT  
ACCTTCTTTGAAAATCTCACTCGTGAGTACATCCCTATTTTTCTTTAAATATCATACTAACTCTCTTACCAAGTTCAAATCGAAAAGGCTCTG  
CGAAGACCTCGCCTCCATCCTATTTCTCTTACCAGCCCGCCGTCGACGCAATTTGGATTCTCCCAAGGCGGCAATTTCTTGCGTGGCTACATA  
TCCCCTGCAATGCTCCACCCATCCGCTCTCTCTGACCTTCGGTTCCCAACACAACGGCATTTCTGCCTTCCAAGCCTGTGGTCTGCCGATT  
TCCTCTGTGCGGTGCTCAAACCTTTTGGCATCCAACACCTGGTCAACCTTTGTCCAATCTCGTCTCGTACCCGCTCAATACTTCAGAGATCC  
GGAAAACCTAGACTCTTACCTTGAATATTTCAATTTCTTGGCGACATCAATAATGAGCGGTTCTCAAGAACCAAACATAATAAATCCAACATG  
GAAAAATTGGAACGATTCGTAATGTATGCTTTGAAAGCAGATACAACTGTCAATCCCTAAGGAAAGTGGATGGTGGGCTGAAGTCAACGGCACGG  
AAGTTACACCACTGAAAGAAAGAGCCATTTATAAAGAAGATTGGCTAGGTTTAAAGACATTTGGATGAGGCCGAAAATTAGTTTTCGAAACCAT  
TCCAGGGGGACATATGACGTTAGGAGAGGAGATGCTAGAGAAGGCTTTCAAAGAGTATTTTGGTCCAGCAGGGAAGAAATTTGGG

>Bcin16g03460 (MLST7), partial sequence [organism=Botrytis cinerea, strain Pepper]  
ATGAACCTCTTGATTTGAACTCTTCATTAATTGCAAGTGATGAACCCCTATTCTGCCAGAGGATAGTTACAAGACGTATATCATTAGTCGAGA  
ACCCTCATGATATATATTGACGGATTTTGAAGCGAATGAAAGTAAACATTTGGTTGATGTTAGGTGTGTTATTTATTTCTGATGAAATGAAC  
AAGAGAGACTGATGAGATAGTGAGCCGCTTTATGAACCGTCAACTGTTTCTCACGGACAGGAAGTTACCATTTGATCCTTCAGTTCCGAATTTCTG  
AAGTGGCGGTTTTAGAGAGGGATGAGGTGGTCAAGGTGATTTGAGCATAAGAGGAGGATTTCAAGGGTGGAGGGGCGAGATGGGGATTGAGAA  
GTTGAGGACGCAGAGGTATGGGTTGGAGGACATTTATGGGATGCATTTGTAAGTTTGGGGGATTGACGAAGGCTTTTGTCTATTTTCTACCAG  
TACGGATCTTGAAGAAAAGATAGCATGAACACGAGGGCTAATAACTAGGAAAATAGCGATTGGAGCGGAGGTAACCGTGGCATAGACCGATTTAG  
TACTTTTCTATGGTCTATGTGACGATCTCTCTGATATCGAAGGTGGAGGAACGGAAATTTCCACGTATCGTGGGACCAAAGGAGGAAGGTGGGAG  
GACTTCTGAAAACCTACGGAAGCATTGGATCCAAGAAGCTGGAGAAAATGTAACAGTAGAAGGGGTGACATTTCAAACCAATCAAGGGAAATGCCG  
TATTCTGGGAAAATACTGACAACAACGGGAGGGGCTATGAT

>Bcin12g03020 (MLST8), partial sequence [organism=Botrytis cinerea, strain Pepper]  
CGATTGGCTGCGAAGAAAACCTGCGCAGCACCGAGTACCCAAAAGCAGCAATAAACCATCGGCAAGGGAATATTTCTCTGAACCACAACATGACA  
CGAGCGCGAAGAGTATATCGGGCGAGAAGCTTCATCAAGAGCACCAAAGCGACAACGAGTCGATGATAAATTATAACTCTTACGGTGGAAAGAAA



TGAAAATACAGCAGCTTATGCTTCCGGGAAACTTCCATCTGGAAGTATAAATGTTGGTGGAGGTAGGAAGACCACCTTTTCAAGAAGAACCACGA  
ACGGCATTGTGCTGGCAAGTTGCCCTTGGAAAGTATCAACATTTGGTGGAAAGAAGGCTACTCAAATCGAGGACGAGGGTAGAGCAGCTTATG  
CTTCCGGAAAATTGCTCCAGGAAGTATAAACTCTGGCGCAAAGAAGGCGATTTCAATCCAAAGATGAAACGAGACCGGCTTATGTCTCCGGAAA  
GCTTCCACATGGTAGTATCGACGGTATGCGAAAACCGTGAAATGGCTGCCGTCCACCGCGAAAATTGCTGAGGGTGGGAGGAAACCAGGCCAGGTT  
GTCTCTTCTCTATTACATTCATCTTCAAAAGAAAACCTTTTGATGAACCCGAAGAACAAGCGGAACCGGCAAACCATCCAATGCGCCTT  
TGACAGAGGAAAATGGGCACTTTACCAATCTAGGGTTATCGAGAAGGCTTGCAGCCATCTATCGACTAACTCGATATGAAAGCTCCGACCGC  
CATTCAAAAAGCATCTGTACAGCAGTTGGTATCGGACGATAGCGATGCTTTCATACAAGCAGAGACTGGATCTGGAAAAACTTTGGCATATCTA  
CTACCTATAGTCGAGCGAATATTAGCATTGAGTGAGAATGGCGTACAAA

>Bcin02g07770 (MLST9), partial sequence [organism=Botrytis cinerea, strain Pepper]  
CAGCTTTCCCTTTTCGGTCTTGGCATCTACAGTCATTGCCATCCCTACACCATCACAACTTGAGTCTCGGGCCGTTATCGATTCCGATGCCGTTG  
TAGGATTTGCCGAAACTGTTCCAGTGGGACCGTAGGAACAGTTTATGAGGCATATAAAACCATTCCCTTAAAGTCGTAAATGGATGCGTACCATT  
CCCTGCCGTCGATGCATCGGGTAACACAGGGTATGTCTTATATCTTTCTCTTCCACACGATTGCTATTGAGTCTCTAACATATTTTAGTGGTG  
GTTTGTACCAACTGGCAGTAGCAATGGTGGTTGCAGCAGCAGTACCGGTCAAGTATATGTTTCGAGGAGGACAAAGCGGATCAAACACGCCAT  
CATGTACTCTGGTAAAGTTCTCTCTAAACTTCTCCTTATAGATCCAACCTAACAAAATCTTAGGTACATGCCAAAGGACGAGCCCTCAACCGGT  
ATTGGTCACCGTCACGATTGGGAAGGTGTAATTGTCTGGCTCTCCAGCGCCACCGCCACAACCTGCCGACAACATCTTAGCCGTTTGTCTTCCG  
CCCACGGAGGCTGGGATTGTCCACGGATGGCTATTCCTTTCTGGTACCAGCCCTTATCAAGTACGAAAGTATCTGGCCCGTCGATCACCTC  
AATGGGTCTTACTAGTACTGTTGGTGGAAAAACAACCTATGATTGCTTGGGAGTCTTTACCAACTGCTGCTCAAACCTGCTCTTGAGAACACCGAT  
TTCGGTGTGCGAATGTTCCATTTCATTCCGGCTGTTTTTCACAGACAATCT

>Bcin04g02090 (MLST10), partial sequence [organism=Botrytis cinerea, strain Pepper]  
CGGAGGATGATATGGCAAAGTCTATGATTACCAAAGCATTGTAGGCATGAGTAGTAAACTGTCGAATATGACTATGAATGATGTTTACAAGCC  
CTACATCCATGTAAGAAAATGTAGAATAGAGAGATCAGTAACTGGAACATAATATCGTTTGTAGGCTTTCAAGTTACTTACGCAGTTCAACCCAA  
CACTACAGCTATTGCCAATCCCCTGTTTCAAATGGCCGTCTCAGCAAATACCATCGAAAAGTACACACTGCTAGGCCCTTTCTTCAGAATA  
TCTCCTCTGCAACAGGAAGTTACCAGGGAATACTTCAGTGCGCCAAAGACGATAGATAGGGCAGACATTGCCACATCTCAAGATGCGTTACGAT  
TGACCTTACAAAACCCATCAAAAAAGATTTACTTGTATATCATCAACCACTTTGTTCGAGCAAGTCCAATCGAAAAAGCAAAACCCCTGGATTGGTT  
CGCTACATTGTGAATCAAAATCACAAAGCGTCGAGCACTTCAGGTAGACCCGAAAGAAGTGTCTTCTGATGGCTTTATGCACAATGTCACCTGTC  
GTTCTAGATGGTCTTTGTGAGCCATTCATGGATACCACATTTCTCGAAAATTTGAAAGATTGATATTGATTATCTAAGACGTGCGCCCTCGTGTAG  
ATATCAAGGACGAGACCAAGTTGAACGCCGACGAGAAGGCTTCTGAGAAGTATTATGAGACACTGTTCTTGGCACTTCTAATTTTCATCTCTGAG  
GTCTTCTTTCTCACATTGGCTGCTCATCATTATGGTAGTGAAGCTCTTAATGCCACGCATAAGAGTCTGGAGAAAGACATCAAATATATTCAA  
AGCAATTGACTGCCGTTGAAGCA

>Bcin01g07220 (MLST1), partial sequence [organism=Botrytis cinerea, strain U11\_SC\_BR02]  
ATGGCATATCTTGTCTTTTTCGCATTATGCTTTTGGAACTGCTGGACAAGCTTGGGTTAGTGTCTGCGTGTAGAAGCACTAAAGAAGATTCT  
CGACAACCGAAGTCATGGTTTGGAGAAATCCAGGAATTCACCTGGCCGGTTGAACGAAGTTTGGATAGGAACCTGAGGAAATGCGTAATCTC  
GTTGGCCGCTTTGCTGGTATTGTATTCACAGCATTTTTTATGCTATTGATATCAATCATTTGGGCTTTTGTGAATACATGGAAACTGACATTAG  
TCTCGATGGCAACTGGGCCAGTTATATACGCTGTCAACAAAACATTCAAATCGCGTGAGTGGAAAATGGGAAAACAAGTGCAACTACGCCCTCTGA  
AATGACCACTGGCATATTTTCAGAGACTTCTCCAACATCAAAGTGGTTCGGGCTTTTACTCTGGAAACTTACTTTGAGACAAAACACACCAA  
GCTACAGAAGAACTTTATAAAGTTGGACTAATACGAGCAAACTACTCGGGATTGCTGTGGGGATTGACAGATGCGATGTCATTTCTATCACCTG  
CAACTGTCTTTTATTATGCCACGGTCTCATTAACCAAGAGAGAGATCAGTATCGCGACTGCACTACAGACTGTCAATCTTCTATTTATTTGGTAT  
TTCTAATAGTACGAATATGCTGGCCATGATACCACAAAATCAACTCTTCTCGCGTTACAGCTACGCATATGCTTGCATTAGCCAATCTCGATTCA  
TCTTCTCCCACGAAAATAAAGGAACCGAACGGCTTTTCGACAATCTTTCCAATCAAATTCACCGTCTTTTCAATCACATACCCTACTCGTCTG  
AAAAACGAACGATATCATCTTTTCTCTTTCCCTGATTCTTAACTCAACAACCTGCACTTGTGACCCCTCCGGCTCCGGAAAATCTACAATAGTT  
GCTCTGCTCATTTGGTCTCTATCCGCCAGATACTTCAACACCTCCACCGTTGACATTCAAATCGCGTCTCCATAAGTAACTGTCGATTCGGTCTC  
TCCGGGCTTCTCTCTCACTCGTTCCACAAAATACCGATTCTATCTCCAGCTACCATTCTCCATAACATCATTTATGGTCTCCAGAATCTTCTCC  
TTGTGCTAGTCTTCATCAGCTATTGCATCAGCAAAAGATGCTGGGATCCATGAATTTATCACATCGCTTCCACAAGGTTATGATACTAT

>Bcin05g07690 (MLST2), partial sequence [organism=Botrytis cinerea, strain U11\_SC\_BR02]  
ACCCTATCACCAAGTCTTTTCTGCACTTTCTCATCAAAAACGAACGAGAACATCATCAATAAATACTTTGCTGAAGTAAATGGGTTTTATT  
TTGGCCAGGATGCCTTCTCTCTACGACAGCAAGCCTTCGATGATATGTTGTGGGTAGTTCTTGGCTGGCTGGATACTGTCAAATTCATTGATTT  
ACATTCTGAATTGCACTATTCAAACGACTCTCAGCCAGAAATGGTACGGACAACAATATAAACTGCAATTTGCACATCGAGCGGACTATTTTGG  
GAATTGGCTTTCACAAGGATGGGATACTACTCTCTGTGGTGGTGGGATGATATGGTACCATACCTTACTCCATAACAAGAACGCAATTACCAATG  
AACTCTATATCGCAGCTTCGATATCGATGTACCTATATTTCCCCGAGATGACAATCAATCCCATTATGCTTTCCAACCTTCATATCCACC  
TCACGATCCGAAATATCTACAGGACGCTGTTGATGCTTACAAATGGCTGAATGGTTCCAACATGACGGATTTACAAGGATTATATGTCGACGGG  
TACCATATCTCGAATCTTTCTGGCGGTGAAAAACCCATTCGCGATTCTAGAAATGAGATGGTATATACCTACAATCAAGGTGTTTTGCTTACTG  
GACAACGTGGTTTTGATGACGCAACCGCCGACGATCATACCTTGTAGATGGCCACAACTCATCGCAATGTTATTAATGCCACAGGCTATGA  
CCTGAAACACAATGTTGTCATCTCACCGCCACCCAAAGATGGTTCCGATTGGCAAAGTGGTTTTGGCTGGGTAGGAATGGAATACCTGGAAGAA

GGATGCGATTCAAGTGCTTCGTGTTCTCAAAATGGACAACTTTCAAAGGCATATTCTTTCATCACTTGATTGCGTTCGTAGTGATTTGCCAG  
GGGAGCCTATTGCAGGGACGAAGGAAAGCTTAGAACTCGACAGAGTGTGGCATTCTGACAAATGCTCACAGTATACAAAATG

>Bcin06g01710 (MLST3), partial sequence [organism=Botrytis cinerea, strain U11\_SC\_BR02]

GTGAGTCTGACTTTTGTATTTGAGCGTTAAGATAGACACTGATATACCAAGGCAATCACCTAATTTTCATGGCGTTCCTCCCTGCATCATCTACC  
TACCCTGGAATGCTGGGAGAATTATACTCAGCAGCTTTCACAGCACCTGCTTTCATTTGGATCTGTTCCCTGCTGTGACAGAATTGGAGACGG  
TTGTAATGGATTGGCTGGCCAAGCTTCTCAATCTCCAGACTGTTATTTGTCTTCGACTCATGGTGGTGGTGTCTATCCAAGGATCAGCCTCGGA  
AGCTATCGTTACCGTTATGGTTGCTGCCCGGATAAAATATCTTCGTGAACTACTGAAGTCTGTTCGGGCATTGAGCTCGAGGATGCGATTGCA  
TATAAGAGGAGTAAGCTAGTTGCACTAGGAAGCGAAATGGCACACAGCTCCACGCAGAAAGCAGCGCAAATAGCTGGCGTTAGATTCCGATCGA  
TTCCAGTACTCGCATCCAATGATTTCCGCATGACGGGTGATGATTTAGAGAAGGTGTTGAAAGAATGCAAATCTCAAGGATTGGAACCCCTCTA  
TCTAACTTCGACTTTGGGAACAACATCTACATGCGCAGTTGACGACTTCGCATCTATTGCAACAGTACTTTCAAATATGCACCTCCAGATGTT  
GCAGGCGAGATCTGGGTTACGTCGATGCTGCTTATGCAGGTGCAGCTTTGGTTTGCCCTGAATACCATCATCTAACATCGTCTTCCAGCATT  
TCCATTCTTCGATATGAACATGCACAAATGGCTTCTGACAAATTTGACGCTTCTTGTCTATATGTCAAGAAACGCAAAGATCTGATCGATGC  
ACTCTCCATAACACCAAGTTATCTTCGCAACGAGTTTTCAGAGAGTGGACTCGTAACCGACTATCGGGACTGGCAAATTCCTCTCGGAAGACGC  
TTCCGAAGCTTAAAGATTTGGTTTGTCTCAGAACCTAC

>Bcin09g03030 (MLST4), partial sequence [organism=Botrytis cinerea, strain U11\_SC\_BR02]

GACCCTTCAACCCACCGCAGCTCCTATAACGAAAGCGAGTATCCTACCAATTTCTCCTTCCACCTGCGACTTTAAGACCATTGGCTTTCCGCAC  
TTTCACAAAAAGCATAGTTTAAACATTGACGTCGTCGGCATTACAAGTGTGGCTACTTTTATTGGAAAGCATTGTGGGACAGGATGGAGGGAA  
GAAGGACTGGCAGAGAGAGTCTTGGAGGAGTTCGCCAAGAGTTGGAAGAATAGGAGTGGCGGTGTCATTGTGCGAGGGCGAGGGAACGGAATTGA  
AGGAGATTCTGAAAGCTTTGGAAGGGAATATGAGTGGTGGAAAGGATAGTCATAGGAAGAGAGCTAAGCCGGCAGAATAGTTTAGTACTGGGATC  
ATCACAATATGGAGAGGTCAATCATACAAGACTTGGGCTACGGCCAGGGAATATACCCAGAGAGGATAGTCAGTCAAGTTTGGGAATGTCAACG  
TTGGAGGTCAATGACGAGGAAGATGAGGATGGCTGATGGATCCAAGAAGGTGGTTAAAAGTCATTGATGCATTTGAGCAACCTCGACTGGTGT  
ACAATGTTGCTAAAAAGCACTTTGATAGGTATGTTTCAATGATAAAATTTTCATCTGAATCGACTAACTCAGTACAGAGATACCTCCAAACCTTC  
ATTGTTCCACCTGCGTCTCATAAAACACTCCTCTTCCAAAACCGCTATAATGTTATCCATCAACGTCCTCTTCGCAATGAATCTTTTCAAACG  
CCCGCTTTTCAAGGTGGCAAATCTTCCCTTCAACGCAGCAGCTCCGCCATTACCACCCAAACAATCATACAAATTAACGCCGATAGCTAATC  
TTCTCGGTTCGAATCGCAGCTCTCATATGCTTCTCGGTCTCCTCAGTATTTACCCACTGGTACCCTCGCCATCAATGACCTGACGGGCAGTAT  
CGCTCTCGATCTTACACACGCAGCAGCCATT

>Bcin11g01310 (MLST5), partial sequence [organism=Botrytis cinerea, strain U11\_SC\_BR02]

ACTGACATGGACCTCATGTGGAACCGGCTAGAATGCGCAACGCTTGAAGTTCCGCTCGAATATGGCGATGCAACGTCAACGGCAAAGCCAGT  
GTTGCGCTTGCTCGTTATCTGCCACTGTTGCCGCGAGCAAGAAGCTCGGGTCTCTCTTGATAAAATCCCGGTGGACCCGGTGCCCTCGGTGTTG  
GCTTTGTGCACTTGAGAGCCGGTGCCCGGCTCGACACTGAGTGGTGGATTGTACGATATCATCGGATGGGATCCACGTGGAACCCGGTGCCTC  
GGCTCCTATTTTGAATGTTTTCGAAATGCCAGTGGGAGTATGATTTTAAACAACGCTTTCCATCTGCTCCGAATCTCTGGCTCGGACAATTT  
GCGAATGCCAGCGCAAATTTGCTGTTAGCTCTGCTATCACATCCTTTGACACTTCTGTGCTGCTCTTGCAAAAAGCTTGCCTGGCTCAGAAAT  
CTCCCGCTCTTTACACCTCAACAGCAGCATATGTTGCTCGAGACATGGCAGCGATAGTCGATGCATTGGATGGGACCTCTGCAAAAACCTTAACTA  
CTGGGGTTTCTCATATGGAACATCTTCCCTAGCTGAGTTTATCCAACTTTCCAGGCCGCGTGGGAAGAGTTCTTGCCGATGGTGTTCGCAC  
GCAAAGGCAAATGCACTCACATACGTTAGCCAACCTTCCAACGATCAACTCAGTGTTCGTGCTTCGTTGAACGATTTTGCAGCTTTCTGCACCA  
CCGCCGCTAGTAAAGGTTGCTCTTTTGCACCCGCCCTACTGGAACCACAGGTAAGTGTGCTACCAGACTGGACAACATAATGAAGGATATGTT  
CCTCAATCCTATTGTTGCTTCGGGCTTAAAGCATCA

>Bcin15g03910 (MLST6), partial sequence [organism=Botrytis cinerea, strain U11\_SC\_BR02]

CGCAAAAACACAAAATCATCCAACGATGAAGATGATACTCCACTTCCCTTGATTATCTGGCATGGACTCGGGCATAATTACAAAGCGGATGGTC  
TTGCGCAAGTTGGAAAACTAGCTGAAGCTATTCATCCTGGGACTTTTGTCTACAATATTCATGTAGATGAGGATGCATCTGCAGATAGGACAGC  
TACCTTCTTTGAAATCTCACTCGTGAGTACATCCCTATTTTCTTTAAATATCATACTAACTCTCTTACCAAGTTCAAATCGAAAAGGTCT  
GCGAAGACCTCGCTCCATCCTATCTCTTACCAGCGCCCGGCTCGACGCAATTTGATTTCTCCAAGGCGGCCAATTTCTTGCCTGGTTACAT  
ATCCCGCTGCAATGCTCCACCCATCCGCTCTCTCCTGACCTTCGGTTCCCAACACAACGGCATTTCTGCTTCCAAGCCTGTGGTCTCGCCGAT  
TTCTCTGTGCGGGTGCCTCAAACCCCTTTTGGGATCCAACACCTGGTCAACCTTTGTCCAATCTCGTCTCGTACCCGCTCAATACTTACAGAGATC  
CGAAAACCTAGACTCTTACCTTGAATATTTCAAATTTCTTGGCGACATCAATAATGAGCGGTTCTCAAGAACCAAACATATAAATCCAACAT  
GGAAAAATTTGAAACGATTCGTAATGTATGCTTTGAAAGACGATACAACGTGCATCCCTAAGGAAAGTGGATGGTGGGCTGAAGTCAACGGCAGC  
GAAGTTACACCACTGAAAAGAAAGACCATTATAAAAGAAAGATTGGCTAGGTTTAAAGACATTTGGATGAGGCGGAAAATTTAGTTTTCGAAACCA  
TTCCAGGGGGACATATGACGTTAGGAGAGGAGATGCTAGAGAAGGCTTTCAAAGAGTATTTTGGTCCAGCAGGGAAGAAATTTGGG

>Bcin16g03460 (MLST7), partial sequence [organism=Botrytis cinerea, strain U11\_SC\_BR02]

CATGAACCTCTTGATTTGAACTCTTCATTAATTGCAAGTGATGAACCCCTATTTCTGCCAGAGGATAGTTACAAGACGTATATCATTAGTTCGAG  
AACCCTCATGATATATATTGACGGATTTTGGAAAGCGAATGAAAGTAAACATTTGGTTGATGTTAGGTGTGTTATTTATCTGATGAAATGAA  
CAAGAGAGACTGATGAGATAGTGAAGCGCTTATGAACCGTCAACTGTTTCTCACGGACAGGAAGTTACCATTGATCCTTACGTTCCGGAATTTCT

```
GAAGTGGCGGTTTTAGAGAGGGATGAGGTGGTCAGGTGTATTGAGCATAGAGCGAGGGCATTTCAGGGGTGGAGGGGCGAGATGGGGATTGAGA
AGTTGAGGACGCAGAGGTATGGGGTTGGAGGACATTATGGGATGCATTTGTAAGTTTTGGGGATTGACGAAGGCTTTTGTCTATTTTCTACCA
GTACGGATCTTGAAAGAAAGATAGCATGAACACGAGGGCTAATAACTAGGAAATAGCGATTGGAGCGGAGGTAAACGTGGCATAGACCGATTTA
GTACTTTCATGGTCTATGTGCGAGTATCCTCTGATATCGAAGGTGGAGGAACGGAAATCCACGTATCGTGGGACCAAAGGAGGAAGGTGGGA
GGACTTCTTGAAACTACGGAAGCATTGGATCCAAGAACTGGAGAAAATGTAACAGTAGAAGGGGTGACATTCAAACCAATCAAGGAAATGCC
GTATTCTGGGAAAATACTGACAACAACGGGAGGGGCTATGAT
```

```
>Bcin12g03020 (MLST8), partial sequence [organism=Botrytis cinerea, strain U11_SC_BR02]
CGATTGGCTGCGAAGAAAACGCGCAGCACCGAGTCACCAAAGCACGAATAAACCATCGGCAAGGGAAATATTCTCTGAACCACAACATGACA
CGAGCGCGGAAGAGTATATCGGGCGAGAAGCTTCATCAAGAGCACCAAGCGACAACGAGTCGATGATAATTATAACTCTTACGGTGGAAAGAAAT
GAAAATACAGCAGCTTATGCTTCCGGGAAAACCTCCATCTGGAAGTATAAATGTTGGTGGAGGTAGGAAGACCACCTTTTCAAGAAGAACCACGAA
CGGCATTTGTGCTGGCAAGTTGCCCCCTGGAAGTATCAACATTTGGTGGAAAGAAGGCTACCCAAATCGAGGACGAGGGTAGAGCAGCTTATGC
TTCCGAAAATTGCCTCCAGGAAGTATAAACTCTGGCGCAAAGAAGGCGATTTTCATTCGAAGATGAAACGAGACCGGCTTATGTCTCCGAAAG
CTTCCACATGGTAGTATCGACGGTATGCGAAAACCGTGAATGGCTGCCGTCCACCGCGAAATTTGCTGAGGGTGGGAGGAAAACAGGCCAGGTTG
TCTCTTCTCTATTACATTCATCCTACTTCAAAGAAAACCTTTTGTGTAACCCGAAAGAACAAGCGGAACCGGCAAAACCATCCAATGCGCCTTT
GACAGAGGAAATGGCGACTTTCACCAATCTAGGGTTATCGAGAAGGCTTGCAGCCCATCTATCGACTAAACTCGATATGAAAGCCCCGACGGCC
ATTCAAAAGCATCTGTGCGAGCTTGGTATCGGACGATAGCGATGCTTTCATACAAGCAGAGACTGGATCTGGAAAACCTTTGGCATATCTAC
TACCTATAGTCGAGCGAATATTAGCATTTGAGTGAGAATGGCGTACAAAAT
```

```
>Bcin02g07770 (MLST9), partial sequence [organism=Botrytis cinerea, strain U11_SC_BR02]
CAGCTTTCCTTTTCGGTCTTGGCATCTACAGTCATTGCCATCCCTACACCATCACAACTTGAGTCTCGGGCCGTTATCGATTCCGATGCCGTTG
TAGGATTTGCCGAAAACGTTCCAGTGGGACCGTAGGAACAGTTTATGAGGCATATAAACCATTCCTTAAAGTCGTAAATGGATGCGTACCATT
CCCTGCCGTCGATGCATCGGGTAACACAGGGTATGTCCCTATATCTTTCTCTTCCACACGATTGCTATTGAGTCTCTAACATATTTTAGTGGTG
GTTTGTACCAACTGGCAGTAGCAATGGTGGTTGCAGCAGCAGTACCGGTCAAGTATATGTTTCGAGGAGGACAAAAGCGGATCAAACCTACGCCAT
CATGTACTCCTGGTAAGTTCTCTCTAAACTTCTCCTTATAGATCCAACCTAACAAAATCTTAGGTACATGCCAAAGGACGAGCCCTCAACCGGT
ATTGGTCAACCGTCACGATTGGGAAGGTGTAATTGTCTGGCTCTCCAGCGCCACCGCCACAACCTGCCGACAACATCTTAGCCGTTTGTCTTCCG
CCCACGGAGGCTGGGATTGTTCCACGGATGGCTATTCCCTTTCTGGTACCAGCCCTCTTATCAAGTACGAAAAGTATCTGGCCCGTCGATCACCTC
AATGGGTCTTACTAGTACTGTTGGTGGAAAACAACCTATGATTGCTTGGGAGTCTTTACCAACTGCTGCTCAAACCTGCTCTTGAGAACACCGAT
TTCGGTGTGCGAATGTTCCATTCATTCGGCTGTTTTTCACAGACAATCTT
```

```
>Bcin04g02090 (MLST10), partial sequence [organism=Botrytis cinerea, strain U11_SC_BR02]
CGGAGGATGATATGGCAAAGTCTATGATTACCAAAGCATTTGTAGGCATGAGTAGTAAACTGTGCAATATGACTATGAATGGTGTTTTACAAGCC
CTACATCCATGTAAGAAAATGTAGAATAGAGAGATCAGTAACTGGAACATAATATCGTTTTGTAGGCTTTCAAGTTACTTACGCAGTTCAACCCAAT
CACTACAGCTATTGCCGAATCCCACTATTTCAAATGGCTGTCTCAGCAAATACCATCGAAAAGTACACACTGCTAGGCCCTTTCTTTCAGAATA
TCTCCTCTGCAACAGGAAGTTACCAGGGAATACTTCACTGCGCCAAAGACGATAGATAGGCGACACATTGCCACATCTCAAGATGCCCTTACGAT
TGACCTTACAAAACCATCAAAAAAGATTTACTTGTATATCATCAACCGCTTTGTTTCGAGCAAGTCCAATCGCCAAAAGCAAAACCTTGGATTGGTT
CGCTACATTGTGAATCAAAAATCACAAGCGTCGAGCACTTCAAGTAGACCCGAAAGAAGTGTCTTCTGATGGCTTTATGCACAATGTCACCTGTC
GTTCTAGATGGTCTTTGTGAGCCATTCATGGATACCACATTTCTCGAAAATTTCAAGATTGATATTGATTATCTAAGACGTGCGCCTCGTGTAG
ATATCAAGGACGAGACCAAGTTGAACGCTGACGAGAAGGCTTCTGAGAAGTATTATGAGGACACTGTTCCCTGGCACCTTCTAATTTTCATCTCTGA
GGTCTTCTTTCTCACATTTGGCTGCTCATATTATGGTAGTGAAGCTCTTAATGCCACGCATAAGAGTCTGGAGAAAAGACATCAAATATATTTCAA
AAGCAATTGACTGCCGTTGAAGCA
```

```
>Bcin01g07220 (MLST1), partial sequence [organism=Botrytis fabae, strain 2230]
ATGGCATATCTTGTCTTTCTTTTCGCATTAAGCCTTGGAACTGCTGGACAAGCTTGGGGTTAGTGCTCTGCGTGTAGAAGCACTAAAGAAGATTCT
CGCACAAACCGAAGTCATGGTTTGGAGATCCAGGAATTCACCTGGCCGTTGAACGAAGTTTTGGATAGGAACTCTGAGGAAATGCGTAATCTCG
TTGGCCGCTTTGCTGGTATTGATTCACAGCATTTTTTATGCTATTGATATCGATCATTTGGGCTTTTCGTGAATACATGGAAACTGACATTAGT
CTCAATGGCAACTGGGCCAGTTATATACGCTGTCACTAAAACGTTCAATCGCGTGGAGTGGAAAATGGGAAAACAAGTGAACCTACGCATCTGAA
ATGACCACTGGCATATTTTTCAGAGACTTTCTCCAACATCAAAGTGGTTCGGGGCTTTTACTCTGGAACTTACTTTGAGACAAAACACACCAAAG
CTACAGAAGAACTTTATAAAGTTGGACTAATACGAGCAAACCTACTCAGGATTTGCTGTGGGGATTGACAGATGCGATGTCATTTCTTATCCTACTGC
AACTATCTTTTATTATGCCACGGTTCTCATTTACCAAGAGAGAGATCAGTATCGCGACTGCCTACAGACTGTCAATCTTCTATTATTTGGTATT
TCTAATAGTACGAATATGCTGGCCATGATACCACAAAATCAAACCTTCTCGCGTTACAGCTACGCATATGCTTGCATTAGCCAATCTCGATTTCAT
CTTCTCCACGAAAATAAAGGAACCGAACGGCTTTGACAAATCTTTCCAATCAAATTCACCGTCTCTCATTCACATATCCTACACGTCCTGA
AAAACGAACGATATCATCCTTTTCTCTTTCCCTGATTCCCTAACTCAACAACCTGCCTTGTGCGACCCCTCCGGCTCCGAAAATCTACAATAGCT
GCTCTGCTCATTTGGTCTCTATCCGCCAGATACTTCAACACCTCCACCGTTGACATTCAAATCGCGTCTCCATAAGTAACTGTCACATTCGGTCTC
TCCGGGCTTCTATCTCACTCGTCCACAAAATACCGATTCTATTTCCAGCTACCATTCTCCATAACATCATTTATGGTCTCCAGAACTTCTCTCC
TTGTGCTAGTCTTCCATCTGCTATTGCATCAGCAAAGATGCTGGGATCCATGAATTTATCACATCGCTTCCACAAGGTTATGATACTAT
```

>Bcin05g07690 (MLST2), partial sequence [organism=Botrytis fabae, strain 2230]  
ACCACATACACCAAGTCTTTTCTGCACTTTCTCATCCAAAAAGAACGAGAATCATCAACAAATACTTTGCTGAAGTAATTGGGTTTTATT  
TTGGCCAGGATGCCTTCTCTCTACGACAGCAAGCCTTCGATGATATGTTGTGGGTAGTTCTTGGTTGGCTGGATACTGTCAAGTTCATTGATTT  
ACATTCTGAATTGCACTATTCAAACGACTCTCAGCCAGAAATGGTACGGACAACAATATAAACCTGCATTTGCACATCGAGCGGACTATTTTGG  
GAATTGGCTTCAACAAGGATGGGATACTACTCTCTGTGGTGGTGGGATGATATGGTCACCATACCTTACTCCACACAAGAACGCAATTACCAATG  
AACTCTATATCGCAGCTTCGATATCGATGTACCTCTATTTCCCCGGAGATGGCAATCAATCCCCATTTATACTTTCCAACCTTTCATATCCACC  
TCACGATCCGAAATATCTACAGGCAGCTGTTGACGCTTACAAATGGCTGAATGGTTCCAACATGACGGATTTACAAGGATTTATATGTCGACGGA  
TATCATATCTCGAATCTTTCTGGCGGTGAAAAACCCCATTTGCGATTCTAGAAATGAGATGGTATATACCTACAATCAGGGTGTTTTGTCTACTG  
GACAACGTGGTCTGTATGACGCAACCGCCGACGATCATACCTTGTGGATGGCCACAACTCATTGCGAATGTTATTAATGCCACAGGCTATGA  
CCTGAAACACAATGTTGTCATCTCACCGCCACCCAAAGATGGTTCCGCATTGGCAAAGTGGTTTGGCCCTGGGTAGGAATGGAATACCTGGAAGAA  
GGACCGGATTCAAGTGCTTCGTGTTCTCAAAAATGGACAAAATTTCAAAGGCATATTTCTCTCATCACTTGATTGCATTTCTGTAGTGATTTGCCAG  
GGGAGCCTATTGCGAGGACGAAAGAAGGCCTAGAACTCGACAGAGTGTGGCATTCTGACAAAATGCTCACAGTATACAAAATG

>Bcin06g01710 (MLST3), partial sequence [organism=Botrytis fabae, strain 2230]  
GTGAGTCTGACTTTTGTATTTGAGCGTTAAGATAGACACTGATATACCAAGGCAATCACCTAATTTTCATGGCGTTCTTCCCTGCATCATCTACC  
TACCCTGGAATGCTGGGAGAATTATACTCAGCAGCTTTCACAGCACCTGCTTTCAATTGGATCTGTTCCCTGCTGTGACAGAATTGGAGACGG  
TTGTAATGGATTGGCTGGCAAGCTTCTCAATCTCCAGACTGTTATTTGTCTTCGACTCATGGTGGTGGTGTATCCAAGGATCAGCTCGGA  
AGCTATCGTTACCGTTATGGTTGCTGCCCGGATAAAATATCTTCGTGAAACCACTGAAGGTCGTCCGGCATTTGAACTCGAGGATGCGATTGCA  
TATAAGAGGAGTAAGCTAGTTGCACTAGGAAGCGAAATGGCACACAGCTCCACGCGAGAAAGCAGCGCAGATAGCTGGCGTTAGATTCCGATCGA  
TTCCAGTACTCGCATCCAATGATTTTGGCATGACGGGTGATGATTTAGAGAAGGTATTGAAAGAATGCAAATCTCAAGGATTGGAACCATTTCTA  
TCTAACTTCGACTTTGGGAACAACATCTACATGCGCAGTTGACGACTTCGCATCTATTGCAACAGTACTTTCAAATATGCACCTCCAGATGTT  
GCAGGCGAGATCTGGGTTACGTCGATGCTGCTTATGCAGGTGCAGCTTTGGTTTGGCCCTGAATACCATCATCTAACATCGTCTTCCAGCATTT  
TTCATTCTTCGATATGAACATGCACAAAATGGCTTCTGACAAAATTTGACGCTTCTTGTCTATATGTCAAGAAACGCAAAGATCTGATCGATGC  
ACTCTCCATAACACCAAGCTATCTTCGCAACGAGTTTTTCAGAGAGTGGACTCGTAACCGACTATCGGGACTGGCAAATTCCTCTCGGAAGACGC  
TTCCGAAGCTTAAAGATTTGGTTTGTCTCAGAACCCTACG

>Bcin09g03030 (MLST4), partial sequence [organism=Botrytis fabae, strain 2230]  
ACCCTTCAACCCACCGCAGCTCCTATACCGAAAGCGAGCATCTGCCAATTTCTCTTCCACCTGCGACTTTAAGACCATTGGCTTTTTCGCACT  
TTCACAAAAAAGCATAGCTTAACATTTGACGTCGTCGGCATTACAAGTGTGGCTACTTTTATTTGGGAAGCATTTGTGGGACAGGATGGAGGGAAG  
AAGGACTGGCAGAGAGAGTCTTGGAGGAGTTCGCCAAGAGTTGGAAGAATAGGAGTGGCGGTATTATTGTGTCAGGGCGAGGGAACGGAATTGAA  
GGAGATTCTGAAAGCTTTGGAAGGGAATATGAGTGGTGAAGGATAGTCGTAGGAAGAGAGCTAAGCCGGCAGAAATAGTTTAGTACTGGGATCA  
TCACAATATGGAGAGGTCAATCATACAAGACTTTGGGCTACGGCCAGGGAATATACCCAGAGAGGATAGTCAGTCAAGTTTGGGAATGTCAACGT  
TGGAGGTCAATGACGAGGAAGATGAGGATGGCCTGATGGATCCAAGAAGGTGGATAAAAAGTCATTGATGCATTTGAGCAACCTCGACTGGTGT  
TAATGTTGCTAAAAAGCACTTTGATAGGTATGTTTCAATGATAAAAATTTTGTCTGAATCGACTAACTCAGTACAGAGATACCTCCAAACCTTCA  
TTGTTCCACCTGCGTCTCATAAAACACTCCTCTTCCAAAACCGCTATAAATGTTATCCATCAACGTCTCCTTCGCAATGAATCTTTTCAAACGC  
CCGCTTTTCAAGGTGGCAAAGCTTCCCTTCAACGCGACGCTCCGCCATTACCACCCAACAACAATCATACAAATTAACGCCGATAGCTAATCT  
TCTCGGTGCGAATCGCAGCTCTCATATGCTTCTCGGTCTCCTCAGTATTTTCGCCACTGGTACCCTCGCCATCAATGACCTGACGGGCAGCATC  
GCTCTCGATCTTACACACGCAGCAGCCATTC

>Bcin11g01310 (MLST5), partial sequence [organism=Botrytis fabae, strain 2230]  
ACTGACATGGACCTCATGTGGAACCGGCGTAGAATGCGCAACGCTTGAAGTTCCGCTCGAATATGGCGATACAACGTCAACGGCAAAGCCAGT  
GTTGCGCTTGCTCGTTATCTGCCACTGTTGCCGCGAGCAAGAAGCTCGGGTCTCTATTGATAAAATCCCGGTGGACCCGGTGCCACTGGTGTG  
GCTTTTTGCACTCTGGAGCCGGTGTGCTGCCGCTCGACACTGAGTGGTGGATTATACGATATCATCGGATGGGATCCACGTGGAACCGGTGCTTC  
GGCTCCTATTTTGGAAATGTTTTCGAAATGCCAGTGCAGGATGATTTTAAACAACGCGTTTCCATCTGCTCCGAATCTCTGGCTCGGACAATTT  
CAAATGCCAGCGCAAATTTCTGCTGTAGCTCTGCTATCACATCCTTTGACACTTCTGTGCTGCTCTTGCAAAAAGCTTGCCTGGCTCAGAAATC  
TCCCGCTCTTTACACCTCAACAGCGGCATATGTTGCTCGAGACATGGCAGCGATAGTCGATGCATTGGATGGGACCTCTGCAAACTTAACTAC  
TGGGGTTTCTCATATGGAATATCTTCTTAGCTGAGTTTATCCAAACTTTCCAGGCCGCGTGGGAAGAGTTCTTGGCCGATGGTGTTCGACG  
CAAAGGCAAATGCACTCACATACGTTAGCCAACTTTCCAAACGATCAACTCAGTGTTCGTGCTTCGTTGAACGATTTTGCAGCTTTCTGCACCAC  
CGCCGGTAGTAAAGGTTGCTCTTTTGGCACCGCCCTACTGGAACCTCAGGTATTGTTGCTACCAGACTGGACAACATAATGAAGGATATGTT  
CTCAATCTATTTGTTGCTTCGGCTTGAGCATCA

>Bcin15g03910 (MLST6), partial sequence [organism=Botrytis fabae, strain 2230]  
GTCAAAACACAAAATCATCCAACGATGAAGATGATACTCCACTTCCCTTGATTATCTGGCATGGACTCGGCGATAAATACAAAGCGGATGGTCT  
TGCGCAAGTTGGAAAATAGCTGAAGCTATTCATCTGGGACTTTTGTCTATAAATATTCATGTAGACGAGGATGCATCTGCAGATAGGACAGCT  
ACCTTCTTTGGAAAATCTCACTCGTGAGTACATCCCTATTTTTCTTTAAATACCATACTAACTCTCTTACCAAGTTCAAATCGAAAGGTCTGC  
GAAGACCTCGCCTCCCATCCTATTTCTCTTACCGCGCCGCGCTCGACGCAATTGGATTCTCCAAGGCGGCAATTTCTGCGCGGTTACATAT  
CCCGCTGCAATGCTCCACCCATCCGCTCTCTCTGACCTTCGGTTCCCAACACAACGGCATTCTGCTTCCAAGCCTGTGGTCTGCCGATTT

CCTCTGTCGCGGTGCTCAAACCCCTTTTGGCGATCCAACACCTGGTCAACCTTTGTCCAATCTCGTCTCGTACCCGCTCAATACCTCAGAGATCCG  
GAAAACCTAGACTCTTACCTTGAATATTTCCAATTTCTTTGCCGACATCAATAATGAGCGCGTTCTCAAGAACCAAACATATAAAATCCAACATGG  
AAAAATTGGAACGATTCGTAATGTATGTCTTTGAAGACGATACAACCTGTCATCCCTAAGGAAAAGTGGATGGTGGGCTGAAGTCAACGGCACGGA  
AGTTACACCCTGAAAAGAAAGACCCATTTATAAAAGAAAGATTGGCTAGGTTTAAAGACATTTGGATGAGGCCGAAAATTTAGTTTTCGAAACCATT  
CCAGGGGGACATATGACGTTAGGAGAGGAGATGCTAGAGAAGACTTTCAAGGAGTATTTTGGTCCAGCAGGGAAAGAATTTGGGG

>Bcin16g03460 (MLST7), partial sequence [organism=Botrytis fabae, strain 2230]

ATGAACCTCTTAATTTGAACTCTTCATTAATTGCAAGTGATGAACCCCTTATTTTGGCCAGAGGATAGTTACAAGACGTATATCATTAGTCGAGA  
ACCACTCATGATATATATTGACGGATTTTGAAGCGAATGAAAGTAAACATTTGGTTGATGTTAGGTGTGTTAATCATTCTGATGAAATGAAC  
AAGAGAGACTGATGAGATAGTGAACCGCTTTATGAACCGTCTACTGTTTCTCACGGGCAGGAAGTTACCATTGATACTTCAGTTTCGAAATTCCTG  
AAGTGGCGGTTTTAGAGAGGGATGAGGTGGTCAAGGTGATTTGAGCATAGAGCGAGGGCATTTTCAGGGGTGGAGGGGCGAGATGGGGATTGAGAA  
GTTGAGGACGCAGAGGTATGGGGTTGGAGGACATTTATGGGATGCATTTGTAAGTTTTGGGGGATTGACGAAGGCTTCTGTCTATTTTCTATCAG  
TACGGACCTTGAAAGAAAAGATAGCATGAACACGCGGGCTAACAACTAGGAAATAGCGATTGGAGCGGAGGTAAACGTGACATAGACCGATTTAG  
TACTTTTCATGGTCTATGTGACGATCTCTCTGATATCGAAGGTGGAGGAACGGAAATTTCCACGTATTTGTGGGACCAAAAGGAGGAAGGTGGGAG  
GACTTCTGGAAAACCTACGGAAGCATTTGGATCCAAGAACTGGACAAAATGTAACAGTAGAAGGGGTGACATTCAAACCAATCAAGGGAAATGCCG  
TATTCTGGGAAAATACTGACAGCAACGGGAGGGGCTACGAT

>Bcin12g03020 (MLST8), partial sequence [organism=Botrytis fabae, strain 2230]

CGATTGGCTGCGAAGAAAACCTGCGCAGCACCGAGTCACCAAAAGCACGAATAAACCATCGGCAAGAGAAAATATTCTCTGAACCACAACATGACA  
CGAGCGCGGAAGAGTATATCGGGCGAGAAGCTTCATCAAGAGCACCAAAGTGACAACGAGTCGATGATAAATTATAACTCTTACGGTGGAAAGAAA  
TGAAAATACAGCAGCTTATGCTTCCGGGAAAACCTCCATCTGGAAGTATAAATGTTGGTGGAGGTAGGAAGACCACCTTTTCAAGAAGAACCACGA  
ACGGCATTTGTGCTGGTAAAGTTGCCCCCTGGAAAGTATCAACATTTGGTGGAAAAGAGGCTACCCAAATCGAGGACGAGGGTAGAGCAGCTTATG  
CTTCCGGAAAATTTGCCCTCCAGGAAGTATAAACTCTGGCGCAAAGAGGCGATTTTCATTTCCAAGATGAAACGAGACCGGCTTATGTCTCCGAAA  
GCTTCCACATGGTAGTATCGACAGTATGCGAAACCGTGAAATGGCTGCCGTCCACCGCGAAAATGCTGAGGGTGGGAGGAAACCAGGCCAGGTT  
GTCTCTTCTCTATTCACATTCATCTACTTCAAAGAAAACCTTCGATGAACCCGAAAGAACAAAGCGGAACCGGCAAAACCATCCAATGCGCCTT  
TGACAGAGGAAAATGGCGACTTTTACCAATCTAGGGTTATCGAGAAGGCTTGACAGCCCATCTATCGACTAAACTCGATATGAAAGCCCCGACAGC  
CATTCAAAAAGCATCTGTACAGCAGTTGGTATCGGACGATAGCGATGCTTTCATACAAGCAGAGACTGGATCTGGAAAACCTTTGGCATATCTA  
CTACCTATAGTCGAGCGAATATTAGCATTTGAGTGAGAATGGCGTACAGA

>Bcin02g07770 (MLST9), partial sequence [organism=Botrytis fabae, strain 2230]

CAGCTTTCCCTTTTCGGTCTTGGCATCTACAGTCATTGCCATCCCTACACCATCACAACCTTGAGTCTCGGGCCGTTATCGATTCCGATGCCGTTG  
TAGGATTTGCCGAAACTGTTCCAGTGGGACCGTAGGAACAGTTTATGAGGCATATAAACCATTCCTTAAAGTCGTAAATGGATGCGTACCATT  
CCCTGCCGTCGATGCATCGGGTAACACAGGGTATGTCTTATACTTTTCTCTTCCACACGATTGCTATTTAGTCTCTAACATATTTTAGTGGTG  
GTTTGTCAACCAACTGGCAGTAGCAATGGTGGTTGACAGCAGCAGTACCGGTCAAGTATACGTTTCGAGGAGGACAAAGCGGATCAAACCTACGCTAT  
CATGTACTCTGGTAAAGTCTCTCTAAACTTCTCCTTATAGATTCAACCTAACAAAATCTTAGGTACATGCCAAAGGACGAGCCCTCAACCGGT  
ATTGGTCAACCGTACGATTGGGAAGGTGTAATTTGTCTGGCTCTCAAGCGCCACCGCCACAACCTGCCGACAACATCTTAGCCGTTTGTCTTCCG  
CCCACGGAGGCTGGGATTGTTCCACCGATGGCTATTTCCCTTTCTGGTACCAGCCCTCTTATCAAGTACGAAAGTATCTGGCCCGTCGATCATTC  
AATGGGTCTTACTAGTACTGTTGGTGGAAAACAACCTTTGATTGCTTGGGAGTCTTTACCAACCGCTGCTCAAACCTGCTCTTGAGAACACCGAT  
TTCGGTGTGCGAATGTTCCATTCATTCGGCTGTTTTACAGATAATCT

>Bcin04g02090 (MLST10), partial sequence [organism=Botrytis fabae, strain 2230]

CGGAGGATGATATGGCAAAGTCTATGATTACCAAAGCATTTGTAGGCATGAGTAGTAAACTGTCGAATATGACTATGAATGATGTTTACAAGCC  
CTACATCCATGTAAGAAAATGTAGAATAGAGAGATCAGTAACTGGAACATAATATCGTTTTGCAGGCTTTCAAGTTACTTACGCAGTTCAACCCAAT  
CACTACAGCTATTGCCGAATCCCCACTATTTCAAATGGCTGTCTCAGCAAATACCATCGAAAAGTACACACTGCTAGGCCCTTTCTTTCAGAATA  
TCTCCTCTGCAACAGGAAGTTACCAGGGAATACTTCAGTGCGCCGAAGACGATAGATAGCGACACATTTGCCACATCTCAAGATGCGTTACGAT  
TGACCTTACAAACCCATCAAAAAGATTTACTTGTATATCATCAACCACTTTGTTTCGAGCAAGTCCAATCGCAAAAAGCAAAACCCCTGGATTGGTT  
CGCTACATTTGTGAATCAAAAATCACAAACGTCGAGCACTTCAGGTAGACCCGAAAAGAGTGTCTTCTGATGGCTTTATGCACAATGTCACCTGTC  
GTTCTAGATGGTCTTTGTGAGCCATTCATGGATACCACATTTCTCGAAAATTTCGAAGATTGATATTGATTATCTAAGACGTGCGCCTCGTGTAG  
ATATCAAGGACGAGACCAAGTTGAACGCTGACGAGAAGGCTTCTGAGAAGTATTATGAGGACACTGTTCTGGCACCTTCAATTTTCATCTCTGA  
GGTCTTCTTTCTCACATTTGGCTGCTCATATTATGGTAGTGAAGCTTTAATGCCACGCATAAGAGTCTGGAGAAAGACATCAAATATATTTCAA  
AAGCAATTGACTGCCGTTGAAGCA

>Bcin01g07220 (MLST1), partial sequence [organism=Botrytis fabae, strain 2235]

ATGGCATATCTTGTCTTTTTCGCATTTATGCCCTTGGAACTGCTGGACAAGCTTGGGTTAGTGTCTGCGTGTAGAAGCACTAAAGAAGATTCT  
CGCACAACCGAAGTCATGGTTTTGAGGAATCCGGGAATTCACCTGGCCGGTTGAACGAAAGTTTTGGATAGGAACTCTGAGGAAATGCGTAATCTC  
GTTGGCCGCTTTGCTGGTATTGTATTACACGATTTTTATGTATTGATATCGATCATTTGGGCTTTCGTGAATACATGGAAACTGACATTAGT  
CTCAATGGCAACTGGGCCAGTTATATACGCTGTCACTAAAACGTTCAATCGCGTGAAGTGGAAAATGGGAAAACAAGTGAACCTACGCATCTGAA

```
ATGACCACTGGCATAATTTTCAGAGACTTTCTCCAACATCAAAGTGGTTCGGGCTTTTACTCTGGAAACTTACTTTGAGACAAAACACACCAAAG
CTACAGAAGAACTTTATAAAGTTGGACTAATACGAGCAAACACTACTCAGGATGCTGTGGGGATTGACAGATGCGATGTCATTCTTCATCACTGC
AACTATCTTTTATTATGCCACGGTTCTCATTACCAAGAGAGAGATCAGTATCGCGACTGCACCTACAGACTGTCAATCTTCTATTATTTGGTATT
TCTAATAGTACGAATATGCTGGCCATGATACCACAAATCAAATCTTCTCGCGTTACAGCTACGCATATGCTTGCATTAGCCAATCTCGATTTCAT
CTTCCCTCCCACGAAAATAAAGGAACCGAACGGCTTTTCGACAATCTTTCCAATCAAATTC AACCGCCTCTCATTCACATATCCTACACGTCCCTGA
AAAACGAACGATATCATCCTTTTCTCTTTCCCTGATTCCCTAACTCAACAACTGCACCTTGTTCGGACCTCCGGCTCCGGAAAATCTACAATAGCT
GCTCTGCTCATTGGTCTCTATCCGCCAGATACTTCAACACCTCCACCGTTGACATTC AATCGCGTCTCCATAAGTAACGTGCACATTCGGTCTC
TCCGGGCTTCTATCTCACTCGTCCACAAAATACCGATTCTATTTCCAGCTACCATTCTCCATAACATCATTTATGGTCTCCAGAATCTTCTCC
TTGTGCTAGTCTTCCATCTGCTATTGCATCAGCAAAAGATGCTGGGATCCATGAATTTATCACATCGCTTCCACAAGGTTATGATACTAT
```

>Bcin05g07690 (MLST2), partial sequence [organism=Botrytis fabae, strain 2235]

```
CACCACTATCACCAAGTCTTTTCTGCACTTTCCCTCATCCAAAAGAACGAGAACATCATCAACAAATACTTTGCTGAAGTAATTGGGTTTTAT
TTTGCCAGGATGCCTTCTCTACGACAGCAAGCCTTCGATGATATGTTGTGGGTAGTTCTTGGTTGGCTGGATACTGTCAAGTTCATTGATT
TACATTCTGAATTGCACTATTC AAACGACTCTCAGCCAGAATGGTACGGACAACAATATAAACCTGCATTTGCACATCGAGCGGACTATTTTG
GGAATTGGCTTCA CAAGGATGGGATACTACTCTCTGTGGTGGTGGGATGATATGGTACCATACTTACTCCATAACAAGAACGCAATTACCAAT
GAACTCTATATCGCAGCTTCGATATCGATGTACCTCTATTTCCCGGAGATGGCAATCAATCCCATTTTATACTTTCCAACCTTCATATCCAC
CTCACGATCCGAAAATATCTACAGGCAGCTGTTGACGCTTACAAAATGGCTGAATGGTTCCAACATGACGGATTTACAAGGATTTATATGTCGACGG
ATATCATATCTCGAATCTTTCTGGCGGTGAAAACACCCATTGCGATTCTAGAAAATGAGATGGTATATACC TACAATCAGGGTGTTTTGTCTACT
GGACAACGTGGTCTGTATGACGCAACCGCCGACGATCATACTTGTGGATGGCCACAACTCATTCGCAATGTTATTAATGCCACAGGCTATG
ACCTGAAAACACAATGTTGTCATCTCACCGCCACCCAAAAGATGGTTCGCAATGGCAAAGTGGTTTGGCCTGGGTAGGAATGGAATACTGGAAGA
AGGATGCGATTCAAGTGTCTCGTGTCTCAAAAATGGACAACTTTCAAAGGCATATCTTTTCATCACTTGATTGCATCTGTAGTGATTTGCCA
GGGGAGCCTATTGCAGGGACGAAAAGAAGCCTAGAACTCGACAGAGTGTGGCATTCTGACAAAATGCTCACAGTATACAAAAT
```

>Bcin06g01710 (MLST3), partial sequence [organism=Botrytis fabae, strain 2235]

```
GGTGAGTCTGACCTTTTGTATTTGAGCGTTAAGATAGACACTGATATACCAAGGCAATCACCTAATTTTCATGGCGTTCTTTCCCTGCATCATC
TTACCTACCCTGGAATGCTGGAGAATTATACTCAGCAGCTTTACAGCACCTGCTTTCAATTGGATCTGTTCCCTGCTGTGACAGAATTGGAG
ACGGTTGTAATGGATTGGCTGGGCCAAGCTTCTCAATCTCCAGACTGTTATTTGTCTTCGACTCATGGTGGTGGTGTATCCAAGGATCAGCC
TCGGAAGCTATCGTTACCCTTATGGTTGCTGCCCCGCGATAAATATCTTCGTGAAACCACTGAAGGTCTGTCCGGCATTTGAACTCGAGGATGCG
ATTGCATATAAGAGGAGTAAGCTAGTTGCACTAGGAAGCGAAAATGGCACACAGCTCCACGCGAGAAAGCAGCGCAGATAGCTGGCGTTAGATTCC
GATCGATTCCAGTACTCGCATCCAATGATTTTGGCCATGACGGGTGATGATTTAGGAGAAGGTATTGAAAGAATGCAAATCTCAAGGATTGGAAC
CATTCTATCTAACTTCGACTTTGGAACAACATCTACATGCGCAGTTTCGACGACTTCGCATCTATTGCAACAGTACTTTCAAAAATATGCACCTCC
AGATGGTTGCAGGCGAGATCTGGGTTACGTCGATGCTGCTTATGCAGGTGCAGCTTTGGTTTGGCCTGAATACCATCAATCTAACATCGTCCCT
TCCAGCATTTTTCATTCCCTTCGATATGAACATGCACAAAATGGCTTCTGACAAAATTTTCGACGCTTCTTGTCTATATGTCAAGAAAACGCAAAGATC
TGATCGATGCACTCTCCATAACACCAAGCTATCTTCGCAACGAGTTTTCAGAGAGTGGACTCGTAACCGACTATCGGGACTGGCAAATTCCTC
TCGGAAGACGCTTCCGAAGCTTAAAGATTTGGTTTGTCTCAGAACCTAC
```

>Bcin09g03030 (MLST4), partial sequence [organism=Botrytis fabae, strain 2235]

```
ACCCTTCAACCCACCGCAGCTCCTATACCGAAAGCGAGCATCTGCCAATTTCTCTTCCACCTGCGACTTTAAGACCATTTGGCTTTTTCGCACT
TTCACAAAAAAGCATAGCTTAACATTTGACGTCGTCCGCATTACAAGTGTGGCTACTTTTATTTGGAAAGCATTTGTGGGACAGGATGGAGGGAAG
AAGGACTGGCAGAGAGAGTCTTTGGAGGAGGTGCGCAAGAGTTGGAAGAATAGGAGTGGCGGTATTTATTTGTGCGAGGGCGAGGGAACGGAATTGAA
GGAGATTCTGAAAGCTTTGGAAGGGAATATGAGTGGTGAAGGATAGTCTAGGAAGAGAGCTAAGCCGGCAGAAATAGTTTAGTACTGGGATCA
TCACAATATGGAGAGGTCAATCATAACAAGACTTGGGCTACGGCCAGGGAATATACCAGAGAGGATAGTCAAGTTTGGGAATGTCAACGTT
GGAGGTCAATGACGAGGAAGATGAGGATGGCTGATGGATCCAAGAAGGTGGATAAAAAGTCAATTGATGCATTTGAGCAACCTCGACTGGTGTAT
AATGTTGCTAAAAAGCACTTTGATAGGTATGTTTCAATGATAAAAATTTTGTCTGAAATCGACTAACTCAGTACAGAGATACCTCCAAACCTTCAT
TGTTCCACCTGCGTCTCATAAAAACACTCCTCTTCCAAAACCGCTATAATGTTATCCATCAACGTCTCCTTCGCAATGAATCTTTTCAAACGCC
CGCTTTTCAAGGTGGCAAAGCTTCCCTTCAACGCAGCACGTCCGCCATTACCACCCAACAACAATCATACAAATTAACGCCGATAGCTAATCTT
CTCGGTGCGAATCGCAGCTCTCATATGCTTCTCGGTCTCCTCAGTATTTTTCGCCCCTGGTACCCTCGCCATCAATGACCTGACGGGCAGCATC
GCTCTCGATCTTACACACGCAGCAGCCATTC
```

>Bcin11g01310 (MLST5), partial sequence [organism=Botrytis fabae, strain 2235]

```
GACTGACATGGACCTCATGTGGAACCGGCGTAGAATGCGCAACGCTTGAAGTTCGGCTCGAATATGGCGATACAACGTCAACGGCAAAGCCAG
TGTTGCGCTTGCTCGTTATCCTGCCACTGTTGCCGCGAGCAAGAAGCTCGGGTCTCTATTGATAAATCCCGGTGGACCCGGTGCCACTGGTGT
GGCTTTTTCAGTCTGGAGCCGGTGTGCGCTCTCGACACTGAGTGGTGGATTATACGATATCATCGGATGGGATCCACGTGGAACCGGTGCTT
CGGCTCCTATTTTGGAAATGTTTTGCAAAATGCCAGTGCAGGATGATGATTTTAAACAACCGGTTTCCATCTGCTCCGAATCTCTGGCTCGGACAAT
TTCAAAATGCCAGCGCAAAATCTGCTGTAGCTCTGCTATCACATCCTTTGACACTTCTGTGCGTGTCTTGC AAAAGCTTGGCTGGCTCAGAAA
TCTCCCCTCTTTACACCTCAACAGCAGCATATGTTGCTCGAGACATGGCAGCGATAGTGCATGCAATGGATGGGACCTCTGCAAAAACCTTAACT
ACTGGGGTTTTCTCATATGGAACATATCTTCTAGCTGAGTTTATCCAACTTTCCAGGCCGCGTGGGAAGAGTTCTTGGCGATGGTGTTCGAA
```

CGCAAAGGC AAAATGC ACTCACATACGTTAGCCAACTTCCCAACGATCAACTCAGTGTTCGTGCTTCGTTGAACGATTTTGCAGCTTTCTGCACC  
ACCGCCGGTAGTAAAGGTTGCTCTTTTGCCACCGCCCTACTGGAACCTCAGGTATTGTTGCTACCAGACTGGACAACATAATGAAGGATATGT  
TCCTCAATCCTATTGTTGCTTCGGGCTTGAGCATCAG

>Bcin15g03910 (MLST6), partial sequence [organism=Botrytis fabae, strain 2235]

GTCAAAACACAAAATCATCCAACGATGAAGATGATACTCCACTTCCCTTGATTATCTGGCATGGACTCGGCGATAATTACAAAGCGGATGGTCT  
TGCGCAAGTTGGAAAAGTAGCTGAAGCTATTCATCTGGGACTTTTGTCTATAATATTCATGTAGACGAGGATGCATCTGCAGATAGGACAGCT  
ACCTTCTTTGGAAAATCTCACTCGTGAGTACATCCCTATTTTTCTTTAAATACCATACTAACTCTCTTACCAAGTTCAAATCGAAAAGGCTCTG  
CGAAGACCTCGCCTCCCATCCTATTCTCTCTACCGCGCCCGCGTCGACGCAATTGGATTCTCCCAAGGCGGCAATTCTTGC GCGGTTACATA  
TCCCCTGCAATGCTCCACCCATCCGCTCTCTCTGACCTTCGGTTCCCAACACAACGGCATTCTGCTTCCAAGCCTGTGGTCCCGCCGATT  
TCCTCTGTGCGGGTGTCAAACCTTTTGCAGTCCAACACCTGGTCAACCTTTGTCCAATCTCGTCTCGTACCCGCTCAATACTTCAGAGATCC  
GGAAAACCTAGACTCTTACCTTGAATATTCCAATTTCTTGGCGACATCAATAATGAGCGCGTTCTCAAGAACCAAACATATAAATCCAACATG  
GAAAAATTGGAACGATTGTAATGTATGTCTTTGAAAGCAGATACAACTGTCATCCCTAAGGAAAGTGGATGGTGGGCTGAAGTCAACGGCAGG  
AAGTTACACCACTGAAAGAAAGAGCCATTTATAAAGAAAGATTGGCTAGGTTTAAAGACATTGGATGAGGCCGGAAAATTAGTTTTTCGAAACCAT  
TCCAGGGGGACATATGACGTTAGGAGAGGAGATGCTAGAGAAAGACTTTCAAGGAGTATTTTGGTCCAGCAGGGAAGAAAATTTGGG

>Bcin16g03460 (MLST7), partial sequence [organism=Botrytis fabae, strain 2235]

CATGAACCTCTTAATTTGAACTCTTCATTAATTGCAAGTGATGAACCTTATTTTGCCAGAGGATAGTTACAAGACGTATATCATTAGTTCGAG  
AACCCTCATGATATATATTGACGGATTTTTGAAAGCGAATGAAAGTAAACATTTGGTTGATGTTAGGTGTGTTAATCATTTCTGATGAAATGAA  
CAAGAGAGACTGATGAGATAGTGAACCGCTTTATGAACCGTCTACTGTTTCTCACGGCAGGAAGTTACCATTGATACTTCAGTTCGAAATTTCT  
GAAGTGGCGGTTTTAGAGAGGGATGAGGTGGTCAAGTGTATTGAGCATAGAGCGAGGGCATTTCAGGGGTGGAGGGGCGAGATGGGGATTGAGA  
AGTTGAGGACGCAGAGGTATGGGGTTGGAGGACATTATGGGATGCATTTGTAAGTTTTGGGGGATTGACGAAGGCTTCTGTCTATTTTCTATCA  
GTACGGACCTTGAAAGAAAGATAGCATGAACACGCGGGCTAACAACTAGGAAATAGCGATTGGAGCGGAGGTAAACGTGGCATAGACCGATTTA  
GTACTTTCATGGTCTATGTGACGTATCCTCTGATATCGAAGGTGGAGGAACGGAATCCCACGTATTGTGGGACCAAAGGAGGAAGGTGGGA  
GGACTTCTTGAAAACCTACGGAAGCATTTGGATCCAAGAACTGGACAAAATGTAACAGTAGAAGGGGTGACATTCAAACCAATCAAGGGAATGCC  
GTATTCTGGGAAAATACTGACAGCAACGGGAGGGGCTACGAT

>Bcin12g03020 (MLST8), partial sequence [organism=Botrytis fabae, strain 2235]

CGATTGGCTGCGAAGAAAAGTGCAGCAGCCGAGTCAACAAAAGCAGCAATAAACCATCGGCAAGAGAAAATATCTCTGAACCACAACATGACA  
CGAGCGCGGAAGAGTATATCGGGCGAGAAGTTTCATCAAGAGCACCAAAGCGACAACGAGTCGATGATAATTATAACTCTTACGGTGGAAAGAAA  
TGAAAATACAGCAGCTTATGCTTCCGGGAAACTTCCATCTGGAAGTATAAATGTTGGTGGAGGTAGGAAGACCCTTTTCAAGAAGAACCACGA  
ACGGCATTGTGCTGTTAAGTTGCCCTTGAAAGTATCAACATTTGGTGGAAAGAGGCTACCCAAATCGAGGACGAGGGTAGAGCAGCTTATG  
CTTCCGGAAAATTTGCCCTCCAGGAAGTATAAACTCTGGCGCAAAGAGGCGATTTTCATTTCCAAGATGAAACGAGACCCGGCTTATGTCTCCGAAA  
GCTTCCACATGGTAGTATCGACAGTATGCGAAAACCGTAAAATGGCTGCCGTCCACCGCGAAAATGTCTGAGGGTGGGGGAAAACAGGCCAGGTTG  
TCTCTTCTCTATTACATTTCAATCCTACTTCAAAGAAAACCTTCGATGAACCGAAGAACAAGCGAACCAGGCAAAAACCATCCAATGCGCTTT  
GACAGAGGAAAATGGCGACTTTCACCAATCTAGGGTTATCGAGAAGGCTTGCAGCCCATCTATCGACTAAACTCGATATGAAAGCCCCGACAGCC  
ATTCAAAAGCATCTGTACAGCAGTTGGTATCGGACGATAGCGATGCTTTTCATACAAGCAGAGACTGGATCTGGAAAACCTTTGGCATACCTAC  
TACCTATAGTCGAGCGAATATTAGCATTTGAGTGAGAATGGCGTACAAA

>Bcin02g07770 (MLST9), partial sequence [organism=Botrytis fabae, strain 2235]

CAGCTTTCCCTTTTCGGTCTTGGCATCTACAGTCAATTGCCATCCCTACACCATCACAACTTGAGTCTCGGGCCGTTATCGATTCCGATGCCGTTG  
TAGGATTTGCCGAAACTGTTCCAGTGGGACCGTAGGAACAGTTTATGAGGCATATAAACCATTCCTTAAAGTCGTAAATGGATGCGTACCATT  
CCCTGCCGTGATGCATCGGGTAACACAGGGTATGTCTTATACTTTTCTCTTCCACACGATTGCTATTGAGTCTCTAACATATTTTAGTGGTG  
GTTTGTCAACAACTGGCAGTAGCAATGGTGGTTGACGACGAGTACCGGTCAAGTATACGTTTCGAGGAGGACAAAGCGGATCAAACCTACGCTAT  
CATGTACTCTGGCAAGTTCTCTCTAAACTTCTCTTATAGATTCAACCTAACAAAATCTTAGGTACATGCCAAAGGACGAGCCCTCAACCGGT  
ATTGGTCAACGTCACGATTGGGAAGGTGTAATTTGCTGGCTCTCAAGCGCCACCGCCACAACCTGCCGACAACATCTTAGCCGTTTGTCTTCCG  
CCCACGGAGGCTGGGATTTGTTCCACCGATGGCTATTTCCCTTTCTGGTACCAGCCCTCTTATCAAGTACGAAAAGTATCTGGCCCGTCGATCATTC  
AATGGGTCTTACTAGTACTGTTGGTGGAAAACAACCTTTGATTGCTTGGGAGTCTTTACCAACCGCTGCTCAAACCTGCTCTTGAGAACACCGAT  
TTCGGTGTGCGAATGTTCCATTCATTCGGCTGTTTTTCACAGATAATCT

>Bcin04g02090 (MLST10), partial sequence [organism=Botrytis fabae, strain 2235]

CGGAGGATGATATGGCAAAGTCTATGATTACCAAAGCATTTGTAGGCATGAGTAGTAAACTGTCGAATATGACTATGAATGATGTTTACAAGCC  
CTACATCCATGTAAGAAAATGTAGAATAGAGAGATCAGTAACTGGAACATAATATCGTTTGCAGGCTTTCAAGTTACTTACGCAGTTCAACCCAAT  
CACTACAGCTATTGCCGAATCCCCTATTTCAAATGGCTGTCTCAGCAAATACCATCGAAAAGTACACACTGCTAGGCCCTTTCTTTCAGAATA  
TCTCCTCTGCAACAGGAAGTTACCAGGGAATACTTCAGTGCGCCAAAGACGATAGATAGGCGACACATTGCCACATCTCAAGATGCGTTACGAT  
TGACCTTACAAACCCATCAAAGATTTACTTTGATATCATCAACCACTTTGTTTCGAGCAAGTCCAATCGCAAAAAGCAAACCCCTGGATTGGTTTC  
GCCTACATTTGTAATCAAATCACAAACGTCGAGCACTTCAGGTAGACCCGAAAGAGTGTCTTCTGATGGCTTTATGCACAATGTCAGTGTGCG

TTCTAGATGGTCTTTGTGAGCCATTCATGGATACCACATTTCTCGAAAATTTGGAAGATTGATATTGATTATCTAAGACGTGCGCCTCGTGTAGA  
TATCAAGGACGAGACCAAGTTGAACGCTGACGAGAAGGCTTCTGAGAAGTATTATGAGGACACTGTTCCCTGGCACTTCTAATTTTCATCTCTGAG  
GTCTTCTTTCTCACATTTGGCTGCTCATCATTTATGGTAGTGAAGCTCTTAATGCCACGCATAAGAGTCTGGAGAAAAGACATCAAATATATTTCAA  
AGCAATTGACTGCCGTTGAAGCA

>Bcin01g07220 (MLST1), partial sequence [organism=Botrytis fabae, strain 2240]

ATGGCATATCTTGTCTTTCTTTTCGCATTATGCTTGGAACTGCTGGACAAGCTTGGGTTAGTGTCTGCGTGTAGAAGCACTAAAGAAGATTCT  
CGCACAAACCGAAGTCATGGTTTTGAGGAATCCAGGAATTCACCTGGCCGGTTGAACGAAAGTTTTGGATAGGAACCTGAGGAAATGCGTAATCTC  
GTTGGCCGCTTTGCTGGTATTGTATTACAGCATTTTTTATGCTATTGATATCGATCATTGGGCTTTGCGTGAATACATGGAACTGACATTAG  
TCTCAATGGCAACTGGGCCAGTTATATACGCTGTCACTAAAACGTTCAATCGCGTGAGTGGAAAATGGGAAAACAAGTGAACCTACGCATCTGA  
AATGACCACCTGGCATATTTTCAGAGACTTTCTCCAACATCAAAGTGGTTTCGGGCTTTTACTCTGGAACCTTACTTTGAGACAAAACACACAAA  
GCTACAGAAGAACTTTATAAAGTTGGACTAATACGAGCAAACCTACTCAGGATTGCTGTGGGGATTGACAGATGCGATGTCATTCTTCATCACTG  
CAACTACCTTTTATTATGCCACGGTCTCATTACCAAGAGAGAGATCAGTATCGCGACTGCACTACAGACTGTCAATCTTCTATTATTTGGTAT  
TTCTAATAGTACGAATATGCTGGCCATGATACCACAAAATCAACTCTTCTCGCGTTACAGCTACGCATATGCTTGCATTAGCCAATCTCGATTCA  
TCTTCTCCACGAAAATAAAGGAACCGAACGGCTTTTCGACAATCTTTCCAATCAAATTCACCCTCTCTCATTACATATCCTACACGTCCTG  
AAAAACGAACGATATCATCTTTTCTCTTTCCCTGATTCTTAACCTCAACAACCTGCACTTGTTCGACCCCTCCGGCTCCGAAAATCTACAATAGC  
TGCTCTGCTCATTGGTCTCTATCCGCCAGATACTTCAACGCCCTCCACCGTTGACATTCAATCGCGTCTCCATAAGTAACGTGCACATTCGGTCT  
CTCCGGGCTTCTATCTCACTCGTCCCACAAAATACCGATTCTATTTCCAGCTACCATTCTCCATAACATCATTTATGGTCTCCCAGAATCTTCTC  
CTTGTGCTAGTCTTCCATCTGCTATTGCATCAGCAAAAAGATGCTGGGATCCATGAATTTATCACATCGCTTCCACAAGGTTATGATACTAT

>Bcin05g07690 (MLST2), partial sequence [organism=Botrytis fabae, strain 2240]

ACCCTATCACCAAGTCTTTTCTGCACTTTCCCTCATCCAAAAAGAACGAGAACATCATCAACAAATACTTTGCTGAAGTAATTGGGTTTTATT  
TTGGCCAGGATGCCCTTCTCTCTACGACAGCAAGCCTTCGATGATATGTTGTGGTAGTCTTGGTTGGCTGGATACTGTCAAGTTCATTGATTT  
ACATTCTGAATTGCACTATTCAAACGACTCTCAGCCAGAAATGGTACGGACAACAATATAAACCTGCATTTGCACATCGAGCGGACTATTTTGG  
GAATTGGCTTCACAAGGATGGGATACTACTCTCTGTGGTGGTGGGATGATATGGTCACCATACTTACTCCATAACAAGAACGCAATTACCAATG  
AACTCTATATCGCAGCTTCGATATCGATGTACCTCTATTTCCCCGGAGATGGCAATCAATCCCCATTTATACTTTCCAACCTTTCATATCCACC  
TCACGATCCGAAATATCTACAGGCAGCTGTTGACGCTTACAAATGGCTGAATGGTTCCAACATGACGGATTTACAAGGATTATATGTCGACGGA  
TATCATATCTCGAATCTTCTGGCCGTGAAAACACCCATTGCGATTCTAGAAAATGAGATGGTATATACTTACAATCAGGGTGTTTTGTCTACTG  
GACAACGTGGTCTGTATGACGCAACCGCCGACGATCATACCTTGTGGATGGCCACAACTCATTTGCGAATGTTATTAATGCCACAGGCTATGA  
CCTGAAAACACAATGTTGTCATCTCACCGCCACCCAAAGATGGTTCCGCATTTGGCAAAGTGGTTTGGCCTGGGTAGGAATGGAATACCTGGAAGAA  
GGATGCGATTCAAGTCTTCTGTTCTCAAAAATGGACAACTTTCAAAGGCATATTTCTTTCATCACTTGATTGCATCCTGTAGTGATTTGCCAG  
GGGAGCCTATTGCAAGGACGAAAAGAGGCTTAGAACTCGACAGAGTGTGGCATTCTGACAAAATGCTCACAGTATACAAAAT

>Bcin06g01710 (MLST3), partial sequence [organism=Botrytis fabae, strain 2240]

GGTGAGTCTGACTTTTGTATTTGAGCGTTAAGATAGACTGATATACCAAGGCAATCACCTAATTTTCATGGCGTTCCTCCCTGCATCATCTAC  
CTACCCTGGAATGCTGGGAGAATATACTCAGCAGCTTTTCACAGCACCTGCTTTCAATTGGATCTGTTCCCCGCTGTGACAGAATTGGAGACG  
GTTGTAATGGATTGGCTGGCCAAGCTTCTCAATCTCCAGACTGTTATTTGTCTTCGACTCATGGTGGTGGTGTATCCAAGGATCAGCCTCGG  
AAGCTATCGTTACCGTTATGGTTGCTGCCCGGATAAATATCTTCGTGAAACCACTGAAGTCTGTTCGGGCATTGAACTCGAGGATGCGATTGC  
ATATAAGAGGAGTAAGCTAGTTGCACTAGGAAGCGAAAATGGCACACAGCTCCACGCAGAAAGCAGCGCAGATAGCTGGCGTTAGATTCCGATCG  
ATTCCAGTACTCGCATCCAATGATTTTGCCATGACGGGTGATGATTTAGAGAAGGTATTTGAAAGAAATGCAAATCTCAAGGATTTGGAACCAATCT  
ATCTAACTTCGACTTTGGGAACAACATCTACATGCGCAGTTGACGACTTCGCATCTATTGCAACAGTACTTTCAAAAATATGCACCTCCAGATGT  
TGCAGGCGAGATCTGGGTTACGTCGATGCTGCTTATGCAGGTGCAGCTTTGGTTTGCCTGAATACCATCATCTAACATCGTCTTCCAGCAT  
TTTCATTCTTTCGATATGAACATGCACAAAATGGCTTCTGACAAAATTTTCGACGCTTCTTGTCTATATGTCAAGAAACGCAAAGATCTGATCGATG  
CACTCTCCATAACACCAAGCTATCTTCGCAACGAGTTTTTCAGAGAGTGGACTCGTAACCGACTATCGGGACTGGCAAATTCCTCTCGGAAGACG  
CTTCCGAAGCTTAAAGATTTGGTTTGTCTCAGAACCCTAC

>Bcin09g03030 (MLST4), partial sequence [organism=Botrytis fabae, strain 2240]

ACCCTTCAACCCACCGCAGCTCCTATACCGAAAAGCGAGCATCCTGCCAATTCCTCTTCCACCTGCGACTTTAAGACCATTGGCTTTTTCGCACT  
TTCACAAAAAAGCATAGCTTAACATTTGACGTCGTGCGCATTACAAGTGTGGCTACTTTTTATTGGAAAGCATTTGTGGGACAGGATGGAGGGAAG  
AAGGACTGGCAGAGAGAGTCTTGGAGGAGGTCGCAAGAGTTGGAAGAATAGGAGTGGCGGTATTATTTGTGCGAGGGCGAGGGAACGGAATTTGAA  
GGAGATTCTGAAAAGCTTTGGAAGGGAATATGAGTGGTGGAAAGGATAGTCGTAGGAAGAGAGCTAAGCCGGCAGAATAGTTTAGTACTGGGATCA  
TCACAATATGGAGAGGTCATATACAAAGACTTTGGGCTACGGCCAGGGAATATACCCAGAGAGGATAGTCAAGTGTGGGAATGTCAACGT  
TGGAGGTCAATGACGAGGAAGATGAGGATGGCTGATGGATCCAAGAAGGTGGATAAAAAGTCATTGATGCATTTGAGCAACCTCGACTGGTGT  
TAATGTTGCTAAAAAGCACTTTGATAGGTATGTTTCAATGATAAAAATTTTGTCTGAATCGACTAACCTCAGTACAGAGATACTCCAAACCTTCA  
TTGTTCCCACCTGCGTCTCATAAAAACACTCCTCTTCCAAAACCGCTATAATGTTATCCATCAACGCTCTCCTTCGCAATGAATCTTTTCAAACGC  
CCGCTTTTCAAAGGTGGCAAAGCTTCCCTTCAACGCAGCAGCTCCGCCATTACCACCAACAACAATCATACAAATTAACGCCGATAGCTAATCT  
TCTCGGTGCAATCGCAGCTCTCATATGCTTCTCGGTCTCCTCAGTATTTTCGCCACTGGTACCCTCGCCATCAATGACCTGACGGGCAGCATC



GCTCTCGATCTTACACACGCAGCAGCCATTC

>Bcin11g01310 (MLST5), partial sequence [organism=Botrytis fabae, strain 2240]

GACTGACATGGACCTCATGTGGAACCGGCGTAGAATGCGCAACGCTTGAAGTTCCGCTCGAATATGGCGATACAACGTCAACGGCAAAAGCCAG  
TGTTGCGCTTGCTCGTTATCCTGCCACTGTTGCCGCGAGCAAGAAGCTCGGGTCTCTATTGATAAAATCCCGTGGACCCGGTGCCACTGGTGT  
GGCTTTTGCAGTCTGGAGCCGGTGTGCCGTCTCGACACTGAGTGGTGGATTATACGATATCATCGGATGGGATCCACGTGGAACCGGTGCTT  
CGGCTCCTATTTTGAATGTTTTGCAAAATGCCAGTGGGAGTATGATTTTAAACAACGCGTTTCCATCTGCTCCGAATCTCTGGCTCGGACAAT  
TTTTCAAATGCCAGCGCAAATTTCTGCTGTTAGCTCTGCTATCACATCCTTTGACACTTCTGTCTGCTGCTTTGCAAAAGCTTGGCTGGCTCAGAA  
ATCTCCCGCTCTTTACACCTCAACAGCAGCATATGTTGCTCGAGACATGGCAGCGATAGTCGATGCATTGGATGGGACCTCTGCAAAACTTAAC  
TACTGGGGTTTCTCATATGGAACATCTTCTAGCTGAGTTTATCCAACTTTCCAGGCCGCGTGGGAAGAGTTCTTGCCGATGGTGTTCGA  
CGCAAAGGCAAAATGCACTCACATACGTTAGCCAACTTTCCAAACGATCAACTCAGTGTTCGTGCTCGTTGAACGATTTTGCAGCTTTCTGCACCA  
CCGCCGGTAATAAAGGTTGCTCTTTTGGCACCCGCCCTACTGGAACCTCAGGTATTGTTGCTACCAGACTGGACAACATAATGAAGGATATGTT  
CCTCAATCCTATTGTTGCTTCGGGCTTGAGCATCA

>Bcin15g03910 (MLST6), partial sequence [organism=Botrytis fabae, strain 2240]

CGTCAAAACACAAAATCATCCAACGATGAAGATGATACTCCACTTCCCTTGATTATCTGGCATGGACTCGGCGATAAATTACAAAGCGGATGGTC  
TTGCGCAAGTTGGAAAACCTAGCTGAAGCTATTCATCCTGGGACTTTTGTCTATAAATTCATGTAGACGAGGATGCATCTGCAGATAGGACAGC  
TACCTTCTTTGGAAATCTCACTCGTGAGTACATCCCCTATTTTCTTTAAATACCATACTAACTCTCTTACCAAGTTCAAATCGAAAAGGCTC  
GCGAAGACCTCGCCTCCCATCCTATTCTCTTACCAGCGCCCGCGTGCAGCGCAATTGGATTCTCCCAAGGCGGCCAATTTCTGCGCGGTTACAT  
ATCCCGCTGCAATGCTCCACCCATCCGCTCTCTCTGACCTTCGGTTCCCAACACAACGGCATTCTGCTTCCAAGCCTGTGGTCTCGCGAT  
TTCTCTGTGCGGGTGTCAAACCCTTTTGGGATCCAACACCTGGTCAACCTTTGTCCAATCTCGTCTCGTACCCGCTCAATACTTCAGAGATC  
CGGAAAACCTAGACTCTTACCTTGAATATTCCAATTTCTTTGCCGACATCAATAATGAGCGCGTTCTCAAGAACCAAACATATAAATCCAACAT  
GGAAAATTTGAACGATTGTAATGTATGCTTTTGAAGACGATACAACCTGTCATCCCTAAGGAAAGTGGATGGTGGGCTGAAGTCAACGGCAGC  
GAAGTTACACCACTGAAAGAAAGAGCCATTTATAAAGAAAGATTGGCTAGGTTTAAAGACATTGGATGAGGCCGAAAATTAGTTTTCGAAACCA  
TTCCAGGGGGACATATGACGTTAGGAGAGGAGATGCTAGAGAAGACTTTCAAGGAGTATTTTGGTCCAGCAGGGAAAGAAATTTGGG

>Bcin16g03460 (MLST7), partial sequence [organism=Botrytis fabae, strain 2240]

ATGAACCTCTTAATTTGAACTCTTCATTAATTTGCAAGTGATGAACCCTTATTTTGGCCAGAGGATAGTTACAAGACGTATATCATTTAGTCGAGA  
ACCACCTCATGATATATATTGACGGATTTTGGAAAAGCAATGAAAAGTAAACATTTGGTTGATGTTAGGTGTGTTAATCATTTCTGATGAAATGAAC  
AAGAGAGACTGATGAGATAGTGAACCCTTTATGAACCCTTACTGTTTCTCACGGGCAGGAAGTTACCATTGATACTTCAGTTGCAAAATTTCTG  
AAGTGGCGGTTTTAGAGAGGGATGAGGTGGTCAAGTGTATTGAGCATAGAGCGAGGGCATTTCAGGGGTGGAGGGGCGAGATGGGGATTGAGAA  
GTTGAGGACGCAGAGGTATGGGGTTGGAGGACATTTATGGGATGCATTTGTAAGTTTTGGGGGATTGACGAAGGCTTCTGTCTATTTTCTATCAG  
TACGGACCTTGAAGAAAAGATAGCATGAACACGCGGGCTAACAACTAGGAAAATAGCGATTGGAGCGGAGGTAACCGTGGCATAGACCGATTTAG  
TACTTTTCATGGTCTATGTGACGATATCCTCTGATATCGAAGGTGGAGGAACGGAATTTCCACGTATTGTGGGACCAAAAGGAGGAAGGTGGGAG  
GACTTCTGAACTACGGAAGCATTGGATCCAAGAACTGACAAAATGTAACAGTAGAAGGGGTGACATTCAAACCAATCAAGGGAAATGCCGTA  
TTCTGGGAAAATACTGACAGCAACGGGAGGGGCTACGAT

>Bcin12g03020 (MLST8), partial sequence [organism=Botrytis fabae, strain 2240]

CGATTGGCTGCGAAGAAAACCTGCGCAGCACCGAGTCACCAAAAGCACGAATAAACCATCGGCAAGAGAAAATTTCTCTGAACCACAACATGACA  
CGAGCGCGGAAGAGTATATCGGGCGGAAAGCTTCATCAAGAGCACCAAAAGCGACAACGAGTCGATGATAAATTATAACTCTTACGGTGGAAAGAAA  
TGAAAATACAGCAGCTTATGCTTCCGGGAAAACCTCCATCTGGAAGTATAAATGTTGGTGGAGGTAGGAAGACCCTTTTCAAGAAGAACCACGA  
ACGGCATTGTGCTGTTAAGTTGCCCTTGAAGTATCAACATTTGGTGGAAAGAAGGCTACCCAAATCGAGGACGAGGGTAGAGCAGCTTATG  
CTTCCGAAAATTTGCTCCAGGAAGTATAAATCTGGCGCAAAGAAGGCGATTTCAATCCAAGATGAAACGAGACCGGCTTATGTCTCCGGAAA  
GCTTCCACATGGTAGTATCGACAGTATGCGAAAACCGTGAAATGGCTGCCGTCCACCAGCGAAAATTTGCTGAGGGTGGGAGGAAACCAGGCCAGGTT  
GTCTCTTCTCTATTTCACATTCATCTACTTCAAAGAAAACCTTCGATGAACCCGAAGAACAAGCGGAACCGGCAAAACCATCCAATGCGCCTT  
TGACAGAGGAAAATGGGACTTTACCAATCTAGGGTTATCGAGAAGGCTTGACGCCATCTATCGACTAACTCGATATGAAAGCCCCGACAGC  
CATTCAAAAAGCATCTGTACAGCAGTTGGTATCGGACGATAGCGATGCTTTCATACAAGCAGAGACTGGATCTGAAAAAATTTGGCATATCTA  
CTACCTATAGTCGAGCGAATATTAGCATTGAGTGAGAATGGCGTACAAA

>Bcin02g07770 (MLST9), partial sequence [organism=Botrytis fabae, strain 2240]

CAGCTTTTCTTTTCGGTCTTGGCATCTACAGTCATTGCCATCCCTACACCATCACAACTTGAGTCTCGGGCCGTTATCGATTCCGATGCCGTTGT  
AGGATTTGCCGAAAACCTGTTCCAGTGGGACCGTAGGAACAGTTTATGAGGCATATAAACCATTCCTTAAAGTCTGTAATGGATGCGTACCATT  
CCTGCCGTCGATGCATCGGGTAACACAGGGTATGTCTTATACTTTTCTCTCCACACGATTGCTATTGAGTCTCTAACATATTTTAGTGGTGG  
TTTGTACCAACTGGCAGTAGCAATGGTGGTTGCAGCAGCAGTACCGGTCAAGTATACGTTTCGAGGAGGACAAAGCGGATCAAACCTACGCTATC  
ATGTACTCCTGGTAAGTTCTCTTAAACTTCTCTTATAGATTCAACCTAACAAAATCTTAGGTACATGCCAAAGGACGAGCCCTCAACCGGTA  
TTGGTACCGTACGATTGGGAAGGTGTAATTTGCTGCTCAAGCGCCACCGCCACAACCTGCCGACAACATCTTAGCCGTTTGTCTTCCGC  
CCACGGAGGCTGGGATTGTTCCACCGATGGCTATTTCTTTCTGGTACCAGCCCTTATCAAGTACGAAAGTATCTGGCCCGTGCATCATTC

ATGGGTCTTACTAGTACTGTTGGTGGAAAACAACCTTTGATTGCTTGGGAGTCTTTACCAACCGCTGCTCAAACCTGCTCTTGAGAACACCGATT  
TCGGTGCTGCGAATGTTCCATTCAATCCGGCTGTTTTACAGATAATCT

>Bcin04g02090 (MLST10), partial sequence [organism=Botrytis fabae, strain 2240]

CGGAGGATGATATGGCAAAGTCTATGATTACCAAAGCATTGTAGGCATGAGTAGTAAACTGTCGAATATGACTATGAATGATGTTTACAAGCC  
CTACATCCATGTAAGAAATGTAGAATAGAGAGATCAGTAACTGGAACATAATATCGTTTTGCAGGCTTTCAAGTTACTTACGCAGTTCAACCCAAT  
CACTACAGCTATTGCCGAATCCCCACTATTTCAAATGGCTGTCTCAGCAAATACCATCGAAAAGTACACACTGCTAGGCCCTTTCTTCAGAATA  
TCTCCTCTGCAACAGGAAGTTACCAGGGAATACTTCAGTGCGCCAAAGACGATAGATAGGCGACACATTGCCACATCTCAAGATGCGTTACGAT  
TGACCTTACAAACCCATCAAAAAGATTTACTTGATATCATCAACCACTTTGTTTCGAGCAAGTCCAATCGCAAAAAGCAAAACCCCTGGATTGGTT  
CGCTACATTGTGAATCAAAATCACAAACGTCGAGCACTTCAGGTAGACCCGAAAGAGTGTCTTCTGATGGCTTTATGCACAATGTCACATGTC  
GTTCTAGATGGTCTTTGTGAGCCATTTCATGGATACCACATTTCTCGAAAATTTTCGAAGATTGATATTGATTATCTAAGACGTGCGCCTCGTGTAG  
ATATCAAGGACGAGACCAAGTTGAACGCTGACGAGAAGGCTTCTGAGAAGTATTATGAGGACACTGTTCCCTGGCACCTTAATTTTCATCTCTGA  
GGTCTTCTTCTCACATTGGCTGCTCATATTATGGTAGTGAAGCTCTTAATGCCACGCATAAGAGTCTGGAGAAAAGACATCAAATATATTTCAA  
AAGCAATTGACTGCCGTTGAAGCA

>Bcin01g07220 (MLST1), partial sequence [organism=Botrytis fabae, strain D12\_B\_B02]

ATGGCATATCTTGTCTTTTCGCATTATGCCTTGGAACGTGCTGGACAAGCTTGGGTTAGTGTCTGCGTGTAGAAGCACTAAAGAAGATTCT  
CGCACAACCGAAGTCATGGTTTGGAGAAATCCAGGAATTCACCTGGCCGGTTGAACGAAGTTTTGGATAGGAACCTCGAGGAAATGCGTAATCTC  
GTTGGCCGCTTTGCTGGTATTGTATTCACAGCATTTTTTATGCTATGATATCGATCATTGGGCTTTTCGTGAATACATGGAACCTGACATTAG  
TCTCAATGGCAACTGGCCAGTTATATACGCTGTCACTAAAACGTTCAATCGCGTGAGTGAAAAATGGGAAAACAAGTGAACCTACGCATCTGA  
AATGACCACTGGCATATTTTCAGAGACTTTCTCCAACATCAAAGTGGTTTCGGGCTTTTACTCTGGAACTTACTTTGAGACAAAACACACCAAA  
GCTACAGAAGAACTTTATAAAGTTGGACTAATACGAGCAAACCTACTCAGGATTGCTGTGGGGATTGACAGATGCGATGTCATTTCTCATCACTG  
CAACTATCTTTTTATTATGCCACGGTTCTCATTACCAAGAGAGAGATCAGTATCGCGACTGCCTACAGACTGTCAATCTTCTATTATTTGGTAT  
TTCTAATAGTACGAATATGCTGGCCATGATACCACAAATCAACTCTTCTCGGTTACAGCTACGCATATGCTTGCATTAGCCAATCTCGATTCA  
TCTTCTCCACGAAAATAAAGGAACCGAACGGCTTTTCGACAATCTTTCCAATCAAATTCACCCGCTCTCATTACATATCCTACACGTCCTG  
AAAAACGAACGATATCATCTTTTCTCTTTCCCTGATTCCTAACTCAACAACCTGCACTTGTTCGGACCTCCGGCTCCGAAAATCTACAATAGC  
TGCTCTGCTCATTGGTCTCTATCCGCCAGATACTTCAACACCTCCACCGTTGACATTCAATCGCGTCTCCATAAGTAACTGTCACATTCGGTCT  
CTCCGGCTTCTATCTCACTCGTCCACAAATACCGATTCTATTTCCAGTACCATTCTCCATAACATCATTTATGGTCTCCAGAATCTTCTC  
CTTGTGCTAGTCTTCCATCTGCTATTGCATCAGCAAAAAGATGCTGGATCCATGAATTTATCACATCGCTTCCACAAGGTTATGATACTAT

>Bcin05g07690 (MLST2), partial sequence [organism=Botrytis fabae, strain D12\_B\_B02]

CACCACTATACCAAGTCTTTTCTGCACTTTCTCATCCAAAAGAACGAGAACATCATCAACAATACTTTGCTGAAGTAATGGGTTTTATT  
TTGGCCAGGATGCCTTCTCTCTACGACAGCAAGCCTTCGATGATATGTTGTGGGTAGTCTTGGTTGGCTGGATACTGTCAAATTCATTGATTT  
ACATTCTGAATTGCACTATTCAAACGACTCTCAGCCAGAATGGTACGGACAACAATATAAACCTGCATTTGCACATCGAGCGCGACTATTTTGG  
GAATTGGCTTACAAGGATGGGATACTACTCTCTGTGGTGGTGGATGATATGGTCACCATACCTTACTCCATAACAAGAACGAATACCAATG  
AACTCTATATCGCAGCTTCGATATCGATGTACCTCTATTTCCCGGAGATGGCAATCAATCCCCATTTATACTTTCCAACCTTTCATATCCACC  
TCACGATCCGAAATATCTACAGGCAGCTGTTGACGCTTACAAATGGCTGAATGGTTCCAACATGACGGATTTACAAGGATTATATGTCGACGGA  
TATCATATCTCGAATCTTTCTGGCGGTGAAAACACCCATTGCGATTCTAGAAATGAGATGGTATATACCTACAATCAGGGTGTTTTGGCTTACTG  
GACAACGTGGTCTGTATGACGCAACCGCCGACGATCATACCTTGTGGATGGCCACAACTCATCGGAATGTTATTAATGCCACAGGCTATGA  
CCTGAAAACACAATGTTGTCTATCTACCGCCACCCAAAAGATGGTTCCGCATTGGCAAAGTGGTTTGGCTGGGTAGGAATGGAATCTGGAAGAA  
GGATGCGATTCAAGTGCTTCGTGTTCTCAAAAATGGACAAAATTTCAAAGGCATATTTCTTTCATCACTTGATTGCATTTCTGTAGTGATTTGCCAG  
GGGAGCCTATTGCAGGGACGAAAAGAAGGCTTAGAACTCGACAGAGTGTGGCATTTCTGACAAAATGCTCACAGTATACAAAATGG

>Bcin06g01710 (MLST3), partial sequence [organism=Botrytis fabae, strain D12\_B\_B02]

GTGAGTCTGACTTTTGTATTTGAGCGTTAAGATAGACACTGATATACCAAGGCAATCACCTAATTTTCATGGCGTTCCTCCCTGCATCATCTACC  
TACCCTGGAATGCTGGGAGAATTATACTCAGCAGCTTTACAGCACCTGCTTTCAATTGGATCTGTTCCCTGCTGTGACAGAATTTGGAGACGG  
TTGTAATGGATTGGCTGGCCAAGCTCCTCAATCTCCAGACTGTTATTTGCTTTCGACTCATGGTGGTGGTGTATCCAAGGATCAGCCTCGGA  
AGCTATCGTTACCGTTATGGTTGCTGCCCGGATAAAATATCTTCGTGAAACCACTGAAGGTCTGTCCGGCATTTGAACTCGAGGATGCGATTGCA  
TATAAGAGGAGTAAGCTAGTTGCACTAGGAAGCGAAATGGCACACAGTCCACGCAGAAAGCAGCGCAGATAGCTGGCGTTAGATTCCGATCGA  
TTCCAGTACCCGCATCCAATGATTTTGGCATGACGGGTGATGATTTAGAGAAGGTAATTGAAAGAATGCAAACTCAAGGATTTGGAACCATTTCTA  
TCTAACTTCGACTTTGGGAACAACATCTACATGCGCAGTTGACGACTTCGCATCTATTGCAACAGTACTTTCAAATAATGCACCTCCAGATGTT  
GCAGGCGAGATCTAGGTTACGTCGATGCTGCTTATGCAGGTGCAGCTTTGGTTTGGCCCTGAATACCATCATCTAACATCGTCTTCCAGCATT  
TTCATTCTTCGATATGAACATGCACAAATGGCTTCTGACAAAATTTTCGACGCTTCTTGTCTATATGTCAAGAAACGCAAAGATCTGATCGATGC  
ACTCTCCATAACACCAAGCTATCTTCGCAACGAGTTTTTCAGAGAGTGGACTCGTAACCGACTATCGGGACTGGCAAATTTCTCTCGGAAGACGC  
TTCCGAAGCTTAAAGATTTGGTTTGTCTCAGAACCTACG

>Bcin09g03030 (MLST4), partial sequence [organism=Botrytis fabae, strain D12\_B\_B02]

CGACCTTCAACCCACCGCAGCTCCTATACCGAAAGCGAGCATCCTGCCAATTTCTCTTCCACCTGCGACTTTAAGACCATTGGCTTTTCGCAC  
TTTACAAAAAGCATAGCTTAACATTGACGTCGTCCGCATTACAAGTGTGGCTACTTTTATTGGAAAGCATTGTGGACAGGATGGAGGGAAAA  
GGACTGGCAGAGAGAGTCTTGGAGGAGGTCCGAAGAGTTGGAAGAATAGGAGTGGCGGTGTTATTGTGCGAGGGCGAGGGAACGAATTGAAGGA  
GATTCTGAAAAGCTTGGAAAGGGAATATGAGTGGTGTGAAGGATAGTCGTAGGAAGAGAGCTAAGCCGGCAGAATAGTTTAGTACTGGGATCATCA  
CAATATGGAGAGGTCAATCATACAAGACTTGGCTACGGCCAGGGAATATACCCAGAGAGGATAGTCAGTCAAGTTTGGGAATGTCAACGTTGGA  
GGTCAAGGACGAGGAAGATGAGGATGGCCTGATGGATCAAGAAGGTGGATAAAAAGTCAATTGATGCATTTGAGCAACCTCGACTTGGTGTATAAT  
GTTGCTAAAAAGCACTTTGATAGGTATGTTTTCAATGATAAAAATTTTGTCTGAATTCGACTAACTCAGTACAGAGATACCTCCAAACCTTCATT  
GTTCCCACCTGCGTCTCATAAAACACTCCTCTTCCAAAACCGCTATAATGTTATCCATCAACGTCTCCTTCGCAAATGAATCTTTTCAAACGCC  
CGCTTTTCAAAGGTGGCAAAGCTTCCCTTCAACGCAGCAGTCCGCCATTACCACCCAACAACAATCATACAATTAACGCCGATAGCTAATC  
TTCTCAGGTGCGAATCGCAGCTCTCATATGCTTCTCGGTCTCCTCAGTATTTCCGCCACTGGTACCCCGCCATCAATGACCTGACGGGCAGCA  
TCGCTCTCGATCTTACACACGCAGCAGCCATTC

>Bcin11g01310 (MLST5), partial sequence [organism=Botrytis fabae, strain D12\_B\_B02]

ACTGACATGGACCTCATGTGGAACCGCGTAGAATGCGCAACGCTTGAAGTTCCGCTCGAATATGGCGATAACAACGTCAACGGCAAAGCCAGT  
GTTGCGCTTGCTCGTTATCCTGCCACTGTTGCCGCGAGCAAGAAGCTCGGGTCTCTATTGATAAAATCCCGGTGGACCCGGTGCCACTGGTGTG  
GCTTTTTGCAGTCTGGAGCCGGTCTGCCGCTCGACACTGAGTGGTGGATTATACGATATCATCGGATGGGATCCACGTGGAACCGGTGCTTC  
GGCTCCTATTTTGGAAATGTTTTGCAAATGCCAGTGGGAGTATGATTTTAAACAACGCGTTTCCATCTGCTCCGAATCTCTGGCTCGGACAATTT  
TCAAATGCCAGCGCAAATTTCTGCTGTAGCTCTGCTATCACATCCTTTGACACTTCTGTGCTGCTCTTGCAAAAGCTTGGCTGGCTCAGAAAT  
CTCCCGCTCTTTACACCTCAACAGCAGCATATGTTGCTCGAGACATGGCAGCGATAGTCGATGCATTTGGATGGGACCTCTGCAAACCTTAAC  
CTGGGGTTTCTCATATGGAACATCTTCCCTAGCTGAGTTTATCCAACTTTCCAGCCGCGTGGGAAGAGTTCTTGCCGATGGTGTTCGAC  
GCAAAGGCAAATGCACTCACATACGTTAGCCAACCTCCCAACGATCAACTCAGTGTTCGTGCTTCGTTGAACGATTTTGCAGCTTTCTGCACCA  
CCGCCGGTAGTAAAGGTTGCTCTTTTGCACCCGCCCTACTGGAACCTCAGGTATTGTTGCTACCAGACTGGACAACATAATGAAGGATATGTT  
CCTCAATCCTATTGTTGCTTCGGGCTTGAGCATCA

>Bcin15g03910 (MLST6), partial sequence [organism=Botrytis fabae, strain D12\_B\_B02]

GTCAAAACACAAAATCATCCAACGATGAAGATGATACTCCACTTCCCTTGATTATCTGGCATGGACTCGGCGATAATTACAAAGCGGATGGTCT  
TGCGCAAGTTGGAACACTAGCTGAAGCTATTCATCCTGGGACTTTTGTCTATAAATATTCATGTAGACGAGGATGCATCTGCAGATAGGACAGCT  
ACCTTCTTTGAAAATCTCACTCGTGAAGTACATCCCTATTTTTCTTTAAATACCATACTAACTCTCTTACCAAGTTCAAATCGAAAAGGTCTG  
CGAAGACCTCGCCTCCCATCCTATTTCTCTTACCAGCCCGCCGCTCGACGCAATTGGATTCTCCCAAGGCGGCCAATTTCTGCGCGGTTACATA  
TCCCCTGCAATGCTCCACCCATCCGCTCTCTCCTGACCTTCGGTTCCCAACACACAGGCATTTCTGCCTTCCAAGCCTGTGGTCTGCCGATT  
TCCTCTGTGCGGGTCTCAAACCTTTTGGGATCCAACACCTGGTCAACCTTTGTCCAATCTCGTCTCGTACCCGCTCAATACTTCAGAGATCC  
GGAAAACCTAGACTCTTGCTTGAATATCCAATTTCTTGGCGACATCAATAATGAGCGGTTCTCAAGAACCACAAACATATAAATCCAACATG  
GAAAAATTGGAACGATTTCGTAATGTATGCTTTGGAGACGATACAACCTGTCATCCCTAAGGAAAGTGGATGGTGGGCTGAAGTCAACGGCAGG  
AAGTTACACCACTGAAAGAAAGAGCCATTTATAAAGAAGATTGGCTAGGTTTAAAGACATTTGGATGAGGCCGAAAATTAGTTTTTCGAAACCAT  
TCCAGGGGGACATATGACGTTAGGAGAGGAGATGCTAGAGAAGACTTTCAAGGAGTATTTTGGTCCAGCAGGGAAGAAATTTGGG

>Bcin16g03460 (MLST7), partial sequence [organism=Botrytis fabae, strain D12\_B\_B02]

ATGAACCTCTTAATTTGAACTCTTCATTAATTGCAAGTATGAACCCTTATTTTGGCCAGAGGATAGTTACAAGACGTATATCATTTAGTCGAGA  
ACCACCTCATGATATATATTGACGGATTTTGGAAAGCGAATGAAAGTAAACATTTGGTTGATGTTAGGTGTGTTAATCATTTCTGATGAAATGAAC  
AAGAGAGACTGATGAGATAGTGAACCGCTTTATGAACCGTCTACTGTTTCTCACGGGCAGGAAGTTACCAATTGATACTTCAGTTTCGAAATTTCTG  
AAGTGGCGGTTTTAGAGAGGGATGAGGTGGTCAAGTGTATTGAGCATAGAGCGAGGGCATTTCAGGGGTGGAGGGGCGAGATGGGGATTGAGAAG  
TTGAGGACGCAGAGGTATGGGGTTGGAGGACATTTATGGGATGCATTTGTAAGTTTTGGGGGATTGACGAAGGCTTCTGTCTATTTTCTATCAGT  
ACGGACCTTGAAAGAAAGATAGCATGAACACGCGGGCTAACAACTAGGAAATAGCGATTGGAGCGGAGGTAAACGTGGCATAGACCGATTTAGT  
ACTTTTCATGGTCTATGTCGACGATCCTCTGATATCGAAGGTGGAGGAACGGAAATCCCACGTATTGTGGGACCAAAAGGAGGAAGGTGGGAGG  
ACTTCTTGAAACTACGGAAGCATTGGATCCAAGAACTGGACAAAATGTAACAGTAGAAGGGGTGACATTCAAACCAATCAAGGAAATGCCGT  
ATTCTGGGAAAATACTGACAGCAACGGGAGGGGCTACGATG

>Bcin12g03020 (MLST8), partial sequence [organism=Botrytis fabae, strain D12\_B\_B02]

CGATTGGCTGCGAAGAAAAGTCCGACGACCGAGTACCAAAGCAGCAATAAACCATCGGCAAGAGAAAATATTTCTGTAACCACAACATGACA  
CGAGCGCGAAGAGTATATCGGGCGAGAAGCTTCATCAAGAGCACCAAAGCGACAACGAGTCGATGATAAATTATAACTCTTACGGTGGAAAGAA  
TGAAAATACAGCAGCTTATGCTTCCGGGAAAACCTCCATCTGGAAAGTATAAATGTTGGTGGAGGTAGGAAGACCCTTTTCAAGAAGAACCACGA  
ACGGCATTGTCGCTGGTAAAGTTGCCCCCTGGAAGTATCAACATTTGGTGGAAAGAAGGCTACCCAAATCGAGGACGAGGGTAGAGCAGCTTATG  
CTTCCGAAAAATTGCCCTCAGGAAGTATAAATCTGGCGCAAAGAAGGCGATTTCAATCCAAGATGAAACGAGACCGGCTTATGCTCCGAAA  
GCTTCCACATGGTAGTATCGACAGTATGCGAAAACCGTGAATGGCTGCCGTCCACCCGCGAAAATGCTGAGGGTGGGAGGAAACCAGGCCAGGTT  
GTCTCTTCTCTATTACATTTCAATCCTACTTCAAAGAAAACCTTCGATGAACCCGAAAGAACAGCGGAACCGGCAAACCATCCAATGCGCCTT  
TGACAGAGGAAATGGCGACTTTACCAATCTAGGGTTATCGAGAAGGCTTGCAGCCCATCTATCGACTAAACTCGATATGAAAGCCCCGACAGC  
CATTCAAAAAGCATCTGTACAGCAGTTGGTATCGGACGATAGCGATGCTTTCATACAAGCAGAGACTGGATCTGGAAAACCTTTGGCATATCTA

CTACCTATAGTCGAGCGAATATTAGCATTGAGTGAGAATGGCGTACAAA

>Bcin02g07770 (MLST9), partial sequence [organism=Botrytis fabae, strain D12\_B\_B02]  
CAGCTTTCCCTTTTCGGTCTTGGCATCTACAGTCATTGCCATCCCTACACCATCACAACTTGAGTCTCGGGCCGTTATCGATTCCGATGCCGTTG  
TAGGATTTGCCGAAACTGTTCCAGTGGGACCGTAGGAACAGTTTATGAGGCATATAAACCATTCCTTAAAGTCGTAAATGGATGCGTACCATT  
CCCTGCCGTCGATGCATCGGGTAACACAGGGTATGTCTTATACTTTTCTCTTCCACACGATTGCTATTGAGTCTCTAACATATTTTAGTGGTG  
GTTTGTACCAACTGGCAGTAGCAATGGTGGTTGCAGCAGCAGTACCGGTCAAGTATACGTTTCGAGGAGGACAAAGCGGATCAAACCTACGCTAT  
CATGTACTCTGGTAAAGTTCTCTCTAAACTTCTCCTTATAGATTCAACCTAACAAAATCTTAGGTACATGCCAAAGGACGAGCCCTCAACCGGT  
ATTGGTCACCGTCACGATTGGGAAGGTGTAATTGTCTGGCTCTCAAGCGCCACCGCCACAACCTGCCGACAACATCTTAGCCGTTTGTCTTCCG  
CCCACGGAGGCTGGGATTGTTCACCGATGGCTATTCCTTTCTGGTACCAGCCCTCTTATCAAGTACGAAAGTATCTGGCCCGTCGATCATTC  
AATGGGTCTTACTAGTACTGTTGGTGGAAAAACAACCTTTGATTGCTTGGGAGTCTTTACCAACCGCTGCTCAAACCTGCTCTTGAGAACACCGAT  
TTCGGTGTGCGAATGTTCCATTTCATTCCGGCTGTTTTTCACAGATAATCTT

>Bcin04g02090 (MLST10), partial sequence [organism=Botrytis fabae, strain D12\_B\_B02]  
CGGAGGATGATATGGCAAAGTCTATGATTACCAAAGCATTTGTAGGCATGAGTAGTAAACTGTGCAATATGACTATGAATGATGTTTACAAGCC  
CTACATCCATGTAAGAAATGTAGAATAGAGAGATCAGTAACTGGAACATAATATCGTTTGCAGGCTTTCAGTTACTTACGCAGTTCAACCCAAT  
CACTACAGCTATTGCCGAATCCCCTACTATTTCAAATGGCTGTCTCAGCAAATACCATCGAAAAGTACACACTGCTAGGCCCTTTCTTCAGAATA  
TCTCCTCTGCAACAGGAAGTTACCAGGAATACTTTCAGTGCGCCAAAAGACGATAGATAGGCGACACATTTGCCACATCTCAAGATGCGTTACGATT  
GACCTTACAAACCCATCAAAAAGATTTACTTGGATATCATCAACCACTTTGTTTCGAGCAAGTCCAATCGCAAAAAGCAAACCCCTGGATTGGTTC  
GCCTACATTGTGAATCAAAAATCACAAACGTCGAGCACTTCAGGTAGACCCGAAAGAAGTGTCTTCTGATGGCTTTATGCACAATGTCACGTGTCG  
TTCTAGATGGTCTTTGTGAGCCATTCATGGATAACCACATTTCTCGAAAATTTGAAAGATTGATATTGATTATCTAAGACGTGCGCCTCGTGTAGA  
TATCAAGGACGAGACCAAGTTGAACGCTGACGAGAAGGCTTCTGAGAAGTATTATGAGGACACTGTTCTTGGCACTTCTAATTTTCATCTCTGAG  
GTCTTCTTTCTCACGTTGGCTGCTCACCATTATGGTAGTGAAGCTCTTAATGCCACGCATAAGAGTCTGGAGAAAGACATCAAATATATTCAA  
AGCAATTGACTGCCGTTGAAGCA

>Bcin01g07220 (MLST1), partial sequence [organism=Botrytis fabae, strain D12\_B\_B28]  
GATGGCATAATCTTGTCTTTTCGCATTATGCCTTGAACGTGTGGACAAGCTTGGGTTAGTGTCTGCGTGTAGAAGCATAAAGAAGATTC  
TCGACAACCGAAGTCATGGTTTGGGAATCCAGGAATTCACCTGGCCGTTGAACGAAGTTTTGGATAGGAACCTGAGGAAATGCGTAATCT  
CGTTGGCCGCTTTGCTGGTATTGTATTACAGCATTTTTTATGCTATTGATATCGATCATTTGGGCTTTCGTGAATACATGGAAACTGACATTA  
GTCTCAATGGCAACTGGGCCAGTTATATACGCTGTCACTAAAACGTTCAATCGCGTGAGTGGAAAATGGGAAAACAAGTGAACCTACGCATCTG  
AAATGACCACTGGCATAATTTTCAGAGACTTTCTCCAACATCAAAGTGGTTCGGGCTTTTACTCTGAAAACCTACTTTGAGACAAAACACACCAA  
AGCTACAGAAGAACTTTATAAAGTTGGACTAATACGAGCAAACCTACTCAGGATTGCTGTGGGGATTGACAGATGCGATGTCAATTTTCATCACT  
GCAACTATCTTTTATTATGCCACGGTTCTCATTACCAAGAGAGAGACCAGTATCGCGACTGCACTACAGACTGTCAATCTTCTATTATTTGGTA  
TTTCTAATAGTACGAATATGCTGGCCATGATACCACAAAATCAACTCTTCTCGCGTTACAGCTACGCATATGCTTGCATTAGCCAATCTCGATT  
ATCTTCTCCACGAAAATAAAGGAACCGAACGGCTTTTCGACAATCTTTCCAATCAAATTCACCGTCTCTCATTCACATATCCTACACGTCT  
GAAAAACGAACGATATCATCTTTTCTCTTTCCCTGATTTCTAACTCAACAACCTGCACTTGTTCGGACCCCTCCGGCTCCGGAAAATCTACAATAG  
CTGCTCTGCTCATTGGTCTCTATCCGCCAGATACTTTCAGCACCTCCACCGTTGACATTCAATCGCGTCTCCATAAGTAACCTGTCACATTCGGT  
TCTCCGGGCTTCTATCTCACTCGTCCACAAAATACCGATTCTATTTCCAGCTACCATTCTCCATAACATCATTTATGGTCTCCAGAATCTTCT  
CCTTGTGCTAGTCTTCCATCTGCTATTGCATCAGCAAAAGATGCTGGGATCCATGAATTTATCACATCGCTTCCACAAGGTTATGATACTATG

>Bcin05g07690 (MLST2), partial sequence [organism=Botrytis fabae, strain D12\_B\_B28]  
ACCACTATACCAAGTCTTTTCTGCACTTTCTCTATCCAAAAGAACGAGAACATCATCAACAAACTTTTGTGAAGTAATTGGGTTTTATT  
TTGGCCAGGATGCCTTCTCTCTACGACAGCAAGCCTTCGATGATATGTTGTGGGTAGTTCTTGGTTGGCTGGATACTGTCAAGTTCAATTGATTT  
ACATTCTGAATTGCACTATTCAAACGACTCTCAGCCAGAAATGGTACGGACAACAATATAAACCTGCATTTGCACATCGAGCGGACTATTTTGG  
GAATTGGCTTCAACAAGGATGGGATACTACTCTCTGTGGTGGTGGGATGATATGGTACCATACCTTACTCCATAACAAGAACGCAATTACCAATG  
AACTCTATATCGAGCTTCGATATCGATGTACCTCTATTTCCCGGAGATGGCAATCAATCCCATTATATACTTTCCAACCTTTCATATCCACC  
TCACGATCCGAAATATCTACAGGCAGCTGTTGACGCTTACAAATGGCTGAATGGTTCCAACATGACGGATTTACAAGGATTTATATGTCGACGGA  
TATCATATCTCGAATCTTTCTGGCGGTGAAAACACCCATTGCGATTCTAGAAATGAGATGGTATATACCTACAATCAGGGTGTTTTGTCTTACTG  
GACAACGTGGTCTGTATGACGCAACCGCCGACGATCATACCTTGTGGATGGCCACAAACTCATTTGCGAATGTTATTAATGCCACAGGCTATGA  
CCTGAAACACAATGTTGTCACTCTACCGCCACCCAAAGATGGTTCGCAATTTGGCAAAGTGGTTTTGGCTGGGTAGGAATGGAATACCTGGAAGAA  
GGATGCGATTCAAGTGTCTCGTGTCTCAAAAATGGACAAAATTTCAAAGGCATATTTCTTTTCATCACTTGATTGCATTTCTGTAGTGAATTTGCCAG  
GGGAGCCTATTGCAAGGACGAAAAGAGGCTAGAACTCGACAGAGTGTGGCATTCTGACAAAATGCTCACAGTATACAAAAT

>Bcin06g01710 (MLST3), partial sequence [organism=Botrytis fabae, strain D12\_B\_B28]  
GTGAGTCTGACTTTTGTATTTGAGCGTTAAGATAGACACTGATATACCAAGGCAATCACCTAATTTTCATGGCGTTCTTCCCTGCATCATCTACC  
TACCCTGGAATGCTGGGAGAATTATACTCAGCAGCTTTTCACAGCACCTGCTTTCAATTGGATCTGTTCCCTGCTGTGACAGAATTGGAGACGG  
TTGTAATGGATTGGCTGGCAAGCTTCTCAATCTCCAGACTGTTATTTGTCTTCGACTCATGGTGGTGGTGTATCCAAGGATCAGCCTCGGA

AGCTATCGTTACCGTTATGGTTGCTGCCCGGATAAAATATCTTCGTGAAACCACTGAAGGTCTGTGCGGCATTGAACCTCGAGGATGCGATTGCA  
TATAAGAGGAGTAAGCTAGTTGCACTAGGAAGCGAAATGGCACACAGCTCCACGCAGAAAGCAGCGCAGATAGCTGGCGTTAGATTCCGATCGA  
TTCCAGTACTCGCATCCAATGATTTTGGCCATGACGGGTGATGATTTAGAGAAGGTATTGAAAAGATGCAAATCTCAAGGATTGGAACCATTTCTA  
TCTAACTTCGACTTTGGGAACAACATCTACATGCGCAGTTGACGACTTCGCATCTATTGCAACAGTACTTTCAAATATGCACCTCCAGATGTT  
GCAGGCGAGATCTGGGTTACGTCGATGCTGCTTATGCAGGTGCAGCTTTGGTTTGCCTGAATACCATCATCTAACATCGTCCCTCCAGCATT  
TTCATTCCCTCGATATGAACATGCACAAATGGCTTCTGACAAATTTGACGCTTCTTGTCTATATGTCAAGAAACGCAAAGATCTGATCGATGC  
ACTCTCCATAACACCAAGCTATCTTCGCAACGAGTTTTCAGAGAGTGGACTCGTAACCGACTATCGGGACTGGCAAATTCCTCTCGGAAGACGC  
TTCCGAAGCTTAAAGATTTGGTTTGTCTCAGAACCTAC

>Bcin09g03030 (MLST4), partial sequence [organism=Botrytis fabae, strain D12\_B\_B28]

ACCCTTCAACCCACCGCAGCTCCTATACCGAAAAGCGAGCATCCTGCCAATTTCTCCTTCCACCTGCGACTTTAAGACCATTGGCTTTTTCGCACT  
TTCACAAAAAAGCATAGCTTAACATTGACGTCGTCGGCATTACAAGTGTGGCTACTTTTATTGGAAAGCATTGTGGGACAGGATGGAGGGAAG  
AAGGACTGGCAGAGAGAGTCTTGGAGGAGTGCCTAAGAGTTGGAAGAATAGGAGTGGCGGTATTATTGTGCGAGGGCAGGGAACGGAATTGAA  
GGAGATTCTGAAAGCTTTGGAAGGGAATATGAGTGGTGGAAAGGATAGTCGTAGGAAGAGAGCTAAGCCGGCAGAATAGTTTAGTACTGGGATCA  
TCACAATATGGAGAGGTCAATCATAACAAGACTTTGGGCTACGGCCAGGGAATATACCCAGAGAGGATAGTCAGTCAAGTTTGGGAATGTCAACGT  
TGGAGGTCAATGACGAGGAAGATGAGGATGGCCTGATGGATCCAAGAAGTGGATAAAAGTCATTGATGCATTTGAGCAACCTCGACTGGTGT  
TAATGTTGCTAAAAAGCACTTTGATAGGTATGTTTCAATGATAAAAATTTTGTCTGAATCGACTAACCTCAGTACAGAGATACCTCCAAACCTTCA  
TTGTTCCACCTGCGTCTCATAAAACACTCCTCTTCCAAAACCGCTATAATGCTATCCATCAACGTCCTCTTCGCAATGAATCTTTTCAAACGC  
CCGCTTTTCAAGGTGGCAAAGCTTCCCTTCAACGCAGCAGCTCCGCCATTACCACCCAACAACAATCATACAAATTAACGCCGATAGCTAATCT  
TCTCGGTCGCAATCGCAGCTCTCATATGCTTCTCGGTCTCCTCAGTATTTGCCCCACTGGTACCCTCGCCATCAATGACCTGACGGGCAGCATC  
GCTCTGATCTTACACACGCAGCAGCCATTCC

>Bcin11g01310 (MLST5), partial sequence [organism=Botrytis fabae, strain D12\_B\_B28]

GACTGACATGGACCTCATGTGGAACCGCGTAGAATGCGCAACGCTTGAAGTTCCGCTCGAATATGGCGATAACAACGTC AACGGCAAAGCCAG  
TGTTGCGCTTGCTCGTTATCCTGCCACTGTTGCCGCGAGCAAGAAGCTCGGGTCTCTATTGATAAATCCCGTGGACCCGGTGGCCACTGGTGT  
GGCTTTTTTGCACTCTGGAGCCGGTGTGCGCTCTCGACACTGAGTGGTGGATTATACGATATCATCGGATGGGATCCACGTGGAACCCGGTGT  
CGGCTCCTATTTTGAATGTTTTGCAATGCCAGTGGGAGTATGATTTTAAACAACGCGTTTCCATCTGCTCCGAATCTCTGGCTCGGACAATT  
TTCAAATGCCAGCGCAAATTTCTGCTGTAGCTCTGCTATCACATCCTTTGACACTTCTGTGCTGCTCTTGCAAAAGCTTGGTGGCTCAGAAA  
TCTCCCGCTCTTTACACCTCAACAGCAGCATATGTTGCTCGAGACATGGCAGCGATAGTCGATGCATTTGGATGGGACCTCTGCAAAACTTAAC  
ACTGGGGTTTTCTCATATGGAACATCTTCTTAGCTGAGTTTATCCAAACTTTCCCAGGCCGCGTGGGAAGAGTTCTTGGCGATGGTGTTTTCGA  
CGCAAAGGCAAATGCACTCACATACGTTAGCCAACTTCCAACGATCAACTCAGTGTTCGTGCTTCGTTGAACGATTTTGCAGCTTTCTGCACCA  
CCGCCGGTAGTAAAGGTTGCTCTTTTGCACCCGCCCTACTGGAACCTCAGGTATTGTTGCTACCAGACTGGACAACATAATGAAGGATATGTT  
CCTCAATCCTATTGTTGCTTCGGGCTTGAGCATCA

>Bcin15g03910 (MLST6), partial sequence [organism=Botrytis fabae, strain D12\_B\_B28]

GTCAAAACACAAAATCATCCAACGATGAAGATGATACTCCACTTCCCTTGATTATCTGGCATGGACTCGGCGATAAATACAAAGCGGATGGTCT  
TGCGCAAGTTGGAAAAGTAGCTGAAGCTATTCATCCTGGGACTTTTGTCTATAAATATTCATGTAGACGAGGATGCATCTGCAGATAGGACAGCT  
ACCTTCTTTGAAAATCTCACTCGTGAGTACATCCCCTATTTTTCCTTTAAATACCATACTAACTCTCTTACCAAGTTCAAATCGAAAAGGTCTG  
CGAAGACCTCGCCTCCATCCTATTTCTCTTACCAGCCCGCCGTCGACGCAATTTGGATTCTCCAAGGCCGCAATTTCTTGGCGGTTACATA  
TCCCCTGCAATGCTCCACCCATCCGCTCTCTCTGACCTTCGGTTCCCAACACAACGGCATTTCTGCTTCCAAGCCTGTGGTCTGCCGATT  
TCCTCTGTGCGGGTGTCAAACCCCTTTTGGCATCCAACACCTGGTCAACCTTTGTCCAATCTCGTCTCGTACCCGCTCAATACTTCAGAGATCC  
GGAAAACCTAGACTCTTACCTTGAATATTTCAATTTCTTGGCGACATCAATAATGAGCGGTTCTCAAGAACCAAACATATAAATCCAACATG  
GAAAAATTTGGAACGATTCGTAATGTATGCTTTGAAAGACGATACAACTGTCATCCCTAAGGAAAGTGGATGGTGGGCTGAAGTCAACGGCACGG  
AAGTTACACCACTGAAAAGAAAGAGCCATTTATAAAAGAAAGATTGGCTAGGTTTAAAGACATTTGGATGAGGCCGAAAAATTAGTTTTCGAAACCAT  
TCCAGGGGGACATATGACGTTAGGAGAGGAGATGCTAGAGAAGACTTTCAAGGAGTATTTTGGTCCAGCAGGGAAGAAATTTGGGG

>Bcin16g03460 (MLST7), partial sequence [organism=Botrytis fabae, strain D12\_B\_B28]

ATGAACCTCTTAATTTGAACTCTTCAATTAATTGCAAGTGATGAACCCTTATTTTGGCCAGAGGATAGTTACAAGGCGTATATCATTAGTCGAGA  
ACCCTCATGATATACATTGACGGATTTTGAAGCGAATGAAAGTAAACATTTGGTTGATGTTAGGTGTGTTAATCATTCTGATGAAATGAAC  
AAGAGAGACTGATGAGATAGTGAACCGCTTTATGAACCGTCTACTGTTTCTCACGGCAGGAAGTTACCATTGATACTTCAGTTGCAAAATCTG  
AAGTGGCGGTTTTAGAGAGGGATGAGGTGGTCAAGGTGATTTGAGCATAGAGCGAGGGCATTTCAAGGGTGGAGGGGCGAGATGGGGATTGAGAA  
GTTGAGGACGCAGAGGTATGGGTTGGAGGACATTTATGGGATGCATTTGTAAGTTTGGGGGATTGACGAAGGCCCTCTGTCTATTTTCTATCAG  
TACGGACCTTGAAGGAAGATAGCATGAACACGCGGGCTAACAACTAGGAAATAGCGATTGGAGCGGAGGTAAACGTGGCATAGACCGATTTAG  
TACTTTTCATGGTCTATGTCGACGATCTCTGATATCGAAGGTGGAGGAACGGAATTTCCACGATTTGTGGGACCAAAGGAGGAAGGTGGGAG  
GACTTCTTGGAAAACCTACGGAAGCATTTGGATCCAGGAACTGGACAAAAATGTAACAGTAGAAGGGGTGACATTCAAACCAATCAAGGGAAATGCCG  
TATTCTGGGAAAATACTGACAGCAACGGGAGGGGCTACGAT

>Bcin12g03020 (MLST8), partial sequence [organism=Botrytis fabae, strain D12\_B\_B28]  
TCGATTGGCTGCGAAGAAAACCTGCGCAGCACCGAGTACCCAAAAGCACGAATAAACCATCGGCAAGAGAAAATATTCTCTGAACCACAACATGAC  
ACGAGCGCGGAAGAGTATATCGGGCGAGAAGCTTCATCAAGAGCACCAAAAGCGACAACGAGTTCGATGATAATTATAACTCTTACGGTGGAAAGAA  
ATGAAAATACAGCAGCTTATGCTTCCGGGAAAACCTCCATCTGGAAGTATAAAATGTTGGTGGAGGTAGGAAGACCACCTTTTCAAGAAGAACCACG  
AACGGCATTGTGCTCGCTGGTAAGTTGCCCCCTGGAAGTATCAACATTTGGTGGAAAAGAAGGCTACCCAAATCGAGGACGAGGGTAGAGCAGCTTAT  
GCTTCCGAAAATTTGCCTCCAGGAAGTATAAACTCTGGCGCAAAGAAGGCGATTTTCATTTCCAAGATGAAACGAGACCAGGCTTATGTCTCCGGAA  
AGCTTCCACATGGTAGTATCGACAGTATGCGAAAACCGTGAATGGCTGCCGTCCACCGCGAAAATTTGCTGAGGGTGGGAGGAAAACCAGGCCAGGT  
TGCTCTTCTCTATTACATTTCAATCCTACTTCAAAGAAAACCTTCGATGAACCCGGAAGAACAAGCGGAACCGGCAAAAACCATCCAATGCGCCT  
TTGACAGAGGAAATGGCGACTTTCACCAATCTAGGGTTATCGAGAAGGCTTGCAGCCCATCTATCGACTAAACTCGATATGAAAGCCCCGACAG  
CCATTCAAAAGCATCTGTACAGCAGTTGGTATCGGACGATAGCGATGCTTTCATACAAGCAGAGACTGGATCTGGAAAAACCTTTGGCATATCT  
ACTACCTATAGTCGAGCGAATATTAGCATTGAGTGAGAAATGGCGTACAAA

>Bcin02g07770 (MLST9), partial sequence [organism=Botrytis fabae, strain D12\_B\_B28]  
CAGCTTTCCCTTTTCGGTCTTGGCATCTACAGTCAATGCCATCCCTACACCATCACAACTTGAGTCTCGGGCCGTTATCGATTCCGATGCCGTTG  
TAGGATTTGCCGAAAACCTGTTCCAGTGGGACCGTAGGAACAGTTTATGAGGCATATAAAACCATTCCTTAAAGTCGTAAATGGATGCGTACCATT  
CCCTGCCGTCGATGCATCGGGTAACACAGGGTATGTCTTATACTTTTCTCTTCCACACGATTGCTATTGAGTCTCTAACATATTTTAGTGGTG  
GTTTGTACCAACTGGCAGTAGCAATGGTGGTTGCAGCAGCAGTACCGGTCAAGTATACGTTTCGAGGAGGACAAAGCGGATCAAACACGCTAT  
CATGTACTCTGGTAAGTTCTCTCTAAAACCTTCTCTTATAGATTTCAACCTAACAAAATCTTAGGTACATGCCAAAGGACGAGCCCTCAACCGGT  
ATTGGTCAACCGTACGATTGGGAAGGTGTAATTTGCTGGCTCTCAAGCGCCACCGCCACAACCTGCCGACAACATCTTAGCCGTTTGTCTTCCG  
CCCACGGAGGCTGGGATTTGTTCCACCGATGGCTATTCCCTTTCTGGTACCAGCCCTCTTATCAAGTACGAAAAGTATCTGGCCCGTCGATCATTC  
AATGGGTCTTACTAGTACTGTTGGTGGAAAACAACCTTTGATTGCTTGGGAGTCTTTACCAACCGCTGCTCAAACCTGCTCTTGAGAACACCGAT  
TTCGGTGTGCGAATGTTCCATTCAATCCGGCTGTTTTTCACAGATAATCT

>Bcin04g02090 (MLST10), partial sequence [organism=Botrytis fabae, strain D12\_B\_B28]  
CGGAGGATGATATGGCAAAGTCTATGATTACCAAAGCATTTGTAGGCATGAGTAGTAAACTGTGCAATATGACTATGAATGATGTTTTACAAGCC  
CTACATCCATGTAAGAAAATGTAGAATAGAGAGATCAGTAACTGGAACATAATATCGTTTTGCAGGCTTTCAAGTTACTTACGCAGTTCAACCCAA  
CACTACAGCTATTGCCGAATCCCCACTATTTCAAATGGCTGTCTCAGCAAATACCATCGAAAAGTACACACTGCTAGGCCCTTTCTTTCAGAATA  
TCTCTCTGCAACAGGAAGTTACCAGGGAATACTTCACTGCGCCAAAGACGATAGATAGGCGACACATTTGCCACATCTCAAGATGCGTTACGAT  
TGACCTTACAAAACCATCAAAAAAGATTTACTTGTATATCATCAACCACTTTGTTTCGAGCAAGTCCAATCGCAAAAAGCAAAAACCCGGATTGGTT  
CGCTACATTGTGAATCAAAAATCACAAAACGTCGAGCACTTCAGGTAGACCCGAAAGAAGTGTCTTCTGATGGCTTTATGCACAATGTCACGTGT  
GTTCTAGATGGTCTTTGTGAGCCATTCATGGATACCACATTTCTCGAAAATTTCAAGATTGATATTGATTATCTAAGACGTGCGCCTCGTGTAG  
ATATCAAGGACGAGACCAAGTTGAACGCTGACGAGAAAGGCTTCTGAGAAATATTATGAGGACACTGTTCTTGGCACTTCTAATTTTCATCTCTGA  
GGTCTTCTTTCTCACATTGGCTGCTCATATTATGGTAGTGAAGCTCTTAATGCCACGCATAAGAGTCTGGAGAAAAGACATCAAATATATTTCAA  
AAGCAATTGACTGCCGTTGAAGCA

>Bcin01g07220 (MLST1), partial sequence [organism=Botrytis fabae, strain G12\_B03B]  
GTGGCATATCTTGTCTTCTCTCGCATTATGCTTGGAACTGCTGGACAAGCTTGGGTTAGTGCTCTGCGTGTAGAAGCACTAAAGAAGATTCT  
CGCACAACCGAAGTCAATGGTTTGGAGAAATCCAGGAATTCACCTGGCCGTTGAACGAAGTTTTGGATAGGAACCTGAGGAAATGCGTAATCTC  
GTTGGCCGCTTTGCTGGTATTGATTTACAGCATTFTTTATGCTATTGATATCGATCAATTTGGGCTTTTCGTGAATACATGGAAACTGACATTAG  
TCTCAATGGCAACTGGGCCAGTTATATACGCTGTCACTAAAACGTTCAATCGCGTGAGTGGAAAATGGGAAAACAAGTGAACCTACGCATCTGA  
AATGACCACCTGGCATATTTTTCAGAGACTTTCTCCAACATCAAAGTGGTTTCGGGCTTTTACTCTGAAAACCTTACTTTGAGACAAAACACACAAA  
GCTACAGAAGAACTTTATAAAGTTGGACTAATACGAGCAAACCTACTCAGGATTGCTGTGGGATTGACAGATGCGATGTCATTTCTTACACTG  
CAACTATCTTTTATATGCCACGGTTCTCATTACCAAGAGAGAGATCAGTATCGCGACTGCACTACAGACTGTCAATCTTCTATTTATTTGGTAT  
TTCTAATAGTACGAATATGCTGGCCATGATACCACAAAATCAAACCTTCTCTCGCGTTACAGCTACGCATATGCTTGCATTAGCCAATCTCGATTCA  
TCTTCTCCCACGAAAATAAAGGAACCGAACGGCTTTTCGACAATCTTTCCAATCAAATTCAAACCGTCTCTCATTACATATCCTACACGTCCTG  
AAAAACGAACGATATCATCTTTTCTCTTTCCCTGATTCCTAACTCAACAACCTGCACTTGTGCGACCCCTCCGGCTCCGAAAATCTACAATAGC  
TGCTCTGCTCATTGGTCTCTATCCGCCAGATACTTCAACACCTCCACCGTTGACATTTCAATCGCGTCTCCATAAGTAACTGTACATTTCCGCTC  
CTCCGGGCTTCTATCTCACTCGTCCCACAAAATACCGATTCTATTTCCAGCTACCATTTCCATAACATCAATTTATGGTCTCCCAGAATCTTCTC  
CTTGTGCTAGTCTTCCATCTGCTATTGCATCAGCAAAAAGATGCTGGGATCCATGAATTTATCACATCGCTTCCACAAGGTTATGATACTAT

>Bcin05g07690 (MLST2), partial sequence [organism=Botrytis fabae, strain G12\_B03B]  
ACCCTATCACCAAGTCCCTTTTCTGCACTTTCCCTCATCCAAAAGAACGAGAACATCATCAACAAATACTTTGCTGAAGTAATGGGTTTTATT  
TTGGCCAGGATGCCTTCTCTACGACAGCAAGCCTTCGATGATATGTTGTGGTAGTTCTTGGTTGGCTGGATACTGTCAAGTTCAATTGATTT  
ACATTTGAAATGCACTATTTCAAACGACTCTCAGCCAGAAATGGTACGGACAACAATATAAAACCTGCATTTGCACATCGAGCGGACTATTTTGG  
GAATTTGGCTTTCACAAGGATGGGATACTACTCTGTGGTGGTGGGATGATATGGTCACCATACTTACTCCATAACAAGAACGCAATTTACCAATG  
AACTCTATATCGCAGCTTCGATATCGATGTACCTCTATTTCCCCGGAGATGGCAATCAATCCCCATTTATACTTTCCAACCTTTCATATCCACC  
TCAGATCCGAAAATATCTACAGGCAGCTGTTGACGCTTACAAAATGGCTGAATGGTTCCAACATGACGGATTTACAAGGATTTATATGTCGACGGA

TATCATATCTCGAATCTTTCTGGCGGTGAAAACACCCATTGCGATTCTAGAAATGAGATGGTATATACCTACAATCAGGGTGTTTTGCTTACTG  
GACAACGTGGTCTGTATGACGCAACCGCCGACGATCATACCTTGTGGATGGCCACAACTCATCGGAATGTTATTAATGCCACAGGCTATGA  
CCTGAAACACAATGTTGTCATCTCACCGCCACCCAAAGATGGTTCGCATTGGCAAAGTGGTTTTGGCCGGGTAGGAATGGAATACTGGAAGAA  
GGATGCGATTCAAGTGCTTCGTGTTCTCAAAAATGGACAAAATTTCAAAGGCATATTTCTTTCATCACTTGATTGCATTTCTGTAGTGATTTGCCAG  
GGGAGCCTATTGCAGGGACGAAAAGAAGCCTAGAACTCGACAGAGTGTGGCATTCTGACAAAATGCTCACAGTATACAAAAT

>Bcin06g01710 (MLST3), partial sequence [organism=Botrytis fabae, strain G12\_B03B]  
GGTGAGTCTGACTTTTTGTATTTGAGCGTTAAGATAGACACTGATATACCAAGGCAATCACCTAATTTTCATGGCGTTCTTCCCTGCATCATCTAC  
CTACCCCTGGAATGCTGGGAGAATTATACTCAGCAGCTTTCACAGCACCTGCTTTCAATTGGATCTGTTCCCTGCTGTGACAGAATTGGAGACG  
GTTGTAATGGATTGGCTGGCCAAGCTTCTCAATCTCCAGACTGTTATCTGTCTTCGACTCATGGTGGTGGTGTATCCAAGGATCAGCCTCGG  
AAGCTATCGTTACCCTTATGGTTGCTGCCCCGCGATAAAATATCTTCGTGAAACCACTGAAGGTCTGTGGGCATTGAACTCGAGGATGCGATTGC  
ATATAAGAGGAGTAAGCTAGTTGCACTAGGAAGCGAAAATGGCACACAGCTCCACGCAGAAAGCAGCGCAGACAGCTGGCGTTAGATTCCGATCG  
ATTCCAGTACCCGCATCCAATGATTTTGCCATGACGGGTGATGATTTAGAGAAGGTATTGAAAGAATGCAAATCTCAAGGATTGGAACCATTTCT  
ATCTAACTTCGACTTTGGGAACAACATCTACATGCGCAGTTGACGACTTCGCATCTATTGCAACAGTACTTTCAAAAATATGCACCTCCAGATGT  
TGCAGGCGAGATCTGGGTTACGTCGATGCTGCTTATGCAAGTGCAGCTTTGGTTTTGCCCTGAATACCATCATCTAACATCGTCTTCCAGCAT  
TTTCATTCCCTTCGATATGAACATGCACAAAATGGCTTCTGACAAAATTTGACGCTTCTTGTCTATATGTCAAGAAACGCAAAGATCTGGTCGATG  
CACTCTCATAACACCAAGCTATCTTCGCAACGAGTTTTTCAGAGAGTGGACTCGTAACCGACTATCGGGACTGGCAAATTCCTCTCGGAAGACG  
CTTCCGAAGCTTAAAGATTTGGTTTTGTCTCAGAACCCTAC

>Bcin09g03030 (MLST4), partial sequence [organism=Botrytis fabae, strain G12\_B03B]  
ACCCCTCAACCCACCGCAGCTCCTATACCGAAAAGCGAGCATCTGCCAATTTCTCTTCCACCTGCGACTTTAAGACCATTGGCTTTTTCGCACT  
TTCACAAAAAAGCATAGCTTAACATTGACGTCGTCGGCATTACAAGTGTGGCTACTTTTTATTGGAAAGCATTGTGGGACAGGATGGAGGGAAG  
AAGGACTGGCAGAGAGAGTCTTGAGAGAGGTCGCCAAGAGTTGGAAGAATAGGAGTGGCGGTGTTATTGTGCGAGGGCGAGGGAACGGAATTGAA  
GGAGATTCTGAAAGCTTTGGAAGGGAATATGAGTGGTGAAGGATAGTCGTAGGAAGAGAGCTAAGCCGGCAGAATAGTTTAGTACTGGGATCA  
TCACAATATGGAGAGGTCAATCATAACAAGACTTGGGCTACGGCCAGGGAATATACCCAGAGAGGATAGTCAGTCAAGTTTGGGAATGTCAACGT  
TGGAGGTCAATGACGAGGAAGATGAGGATGGCCTGATGGATCCAAGAAGGTGGATAAAAGTCATTGATGCATTTGAGCAACCTCGACTGGTGT  
TAATGTTGCTAAAAAGCACTTTGATAGGTATGTTTCAATGATAAAAATTTTGTCTGAATCGACTAATCAGTACAGAGATACCTCCAAACCTTCA  
TTGTTCCACCTGCGTCTCATAAAACACTCCTCTTCCAAAACCGCTATAATGTTATCCATCAACGTCTCCTTCGCAATGAATCTTTTTCAAACGC  
CCGCTTTTCAAGGTGGCAAAGCTTCCCTTCAACGCAGCAGCTCCGCCATTACCACCCAACAACAATCATACAAATTAACGCCGATAGCTAATCT  
TCTCGGTCGCAATCGCAGCTCTCATATGCTTCTCGGTCCTCAGTATTTTCGCCACTGGTACCCTCGCCATCAATGACCTGACGGGCAGCATC  
GCTCTCGATCTTACACACGCAGCAGCCATT

>Bcin11g01310 (MLST5), partial sequence [organism=Botrytis fabae, strain G12\_B03B]  
ACTGACATGGACCTCATGTGGAACCGCGTAGAATGCGCAACGCTTGAAGTTCGCTCGAATATGGCGATACAACGTCAACGGCAAAGCCAGT  
GTTGCGCTTGCTCGTTATCTGCCACTGTTGCCGCGCAAGAAGCTCGGGTCTCTATTGATAAATCCCGTGGACCCGGTGGCACTGGTGTGG  
CTTTTTGCAGTCTGGAGCCGGTGTGCGCTCTCGACACTGAGTGGTGGATTATACGATATCATCGGACGGGATCCACGTGGAACCCGGTGTCTCG  
GCTCCTATTTTTGGAATGTTTTGCAAAATGCCAGTGCAGGAGTATGATTTTTAACAAACGCGTTTTCCATCTGCTCCGATCTCTGGCTCGGACAATTTCA  
AATGCCAGCGCAAATTTCTGCTGTAGCTCTGCTATCACATCCTTTGACACTTCTGTGCTGCTCTTGCAAAAAGCTTGGCTGGCTCAGAAATCTC  
CCGCTCTTTACACCTCAACAGCAGCATATGTTGCTCGAGACATGGCAGCGATAGTCGATGCATTTGGATGGGACCTCTGCAAAACTTAACACTG  
GGGTTTTCTCATATGGAACATATCTTCCTAGCTGAGTTTATCCAAAATTTCCAGGCCGCGTGGGAAGAGTTCTTGGCGATGGTGTTTTCGACGCA  
AAGGCAAATGCACTCACATACGTTAGCCAACCTTCCCAACGATCAACTCAGTGTTCGTGCTTCGTTGAACGATTTTGCAGCTTTCTGCACCACCG  
CCGGTAGTAAAGGTTGCTCTTTTGCCACCGCCCTACTGGAACCTCAGGTATTGTTGCTACCAGACTGGACAACATAATGAAGGATATGTTCTC  
CAATCTATTGTTGCTTCGGGCTTGAGCATCA

>Bcin15g03910 (MLST6), partial sequence [organism=Botrytis fabae, strain G12\_B03B]  
GTCAAAACACAAAATCATCAACGATGAAGATGATACTCCACTTCCCTTGATTATCTGGCATGGACTCGGCGATAAATACAAAGCGGATGGTCT  
TGCGCAAGTTGGAAAACCTAGCTGAAGCTATTCATCTGGGACTTTTTGTCTATAATATTCATGTAGACGAGGATGCATCTGCAGATAGGACAGCT  
ACCTTCTTTGGAAAATCTCACTCGTGAGTACATCCCTATTTTTTCTTTAAATACCATACTAATCTCTTACCAAGTTCAAATCGAAAAGGTCTG  
CGAAGACCTCGCCTCCCATCCTATTTCTCTTACCAGCGCCCGCTCGACGCAATTGGATTCTCCCAAGGCGGCAATTTCTGCGCGGTTACATA  
TCCCCTGCAATGCTCCACCATCCGCTCTCTCTGACCTTCGGTTCCCAACACAACGGCATTTCTGCCCTTCCAAGCCTGTGGTCTGCCGATT  
TCTCTGTGCGGGTGTCAAACCTTTTGCAGTCCAACACCTGGTCAACCTTTGTCCAATCTCGTCTCGTACCCGCTCAATACTTCAGAGATCC  
GGAAAACCTAGACTCTTACCTTGAATATTTCAATTTCTTGGCCGACATCAATAATGAGCGCGTTCTCAAGAACCAAACATATAAATCCAACATG  
GAAAAATTGGAACGATTGTAATGTATGCTTTGAAAGACGATACAACTGTCATCCCTAAGGAAAGTGGATGGTGGGCTGAAGTCAACGGCACGG  
AAGTTACACCACTGAAAGAAAGAGCCATTTATAAAGAAAGATTGGCTAGGTTTTAAAGACATTTGGATGAGGCCGAAAAATTAGTTTTTCGAAACCAT  
TCCAGGGGGACATATGACGTTAGGAGAGGAGATGCTAGAGAAGACTTTCAGGGAGTATTTTGGTCCAGCAGGGAAGAAATTTGGG

>Bcin16g03460 (MLST7), partial sequence [organism=Botrytis fabae, strain G12\_B03B]

ATGAACCTCTTAATTTGAACTCTTCATTAATTTGCAAGTGATGAACCCCTTATTTTGCCAGAGGATAGTTACAAGACGTATATCATTAGTCGAGA  
ACCACCTCATGATATATATTGACGGATTTTGAAGCGAATGAAAGTAACATTTGGTTGATGTTAGGTGTGTTAATCATTCTGATGAAATGAACA  
AGAGAGACTGATGAGATAGTGAACCGCTTATGAACCGTCTACTGTTTCTCACGGGCAGGAAGTTACCATTGATACTTCAGTTCGAAATTTCTGA  
AGTGGCGGTTTTAGAGAGGGATGAGGTGGTCAGGTGTATTGAGCATAGAGCGAGGGCATTTTCAGGGGTGGAGGGGCGAGATGGGGATTGAGAAG  
TTGAGGACGCAGAGGTATGGGTTGGAGGACATTATGGGATGCATTTGTAAGTTTTGGGGGATTGACGAAGGCTTCTGTCTATTTTCTATCAGTA  
CGGACCTTGAAAGAAGGATAGCATGAACACGCGGGCTAACAACTAGGAAATAGCGATTGGAGCGGAGGTAAACGTGGCATAGACCGATTTAGTA  
CTTTTCATGGTCTATGTGACGATCTCTGATATCGAAGGTGGAGGAACGGAAATTTCCACGTATTGTGGGACCAAAGGAGGAAGGTGGGAGGA  
CTTCTGGAAACTACGGAAGCATTGGATCCAAGAAGTGGACAAAATGTAACAGTAGAAGGGGTGACATTCAAACCAATCAAGGGAAATGCCGTA  
TTCTGGGAAAATACTGACAGCAACGGAAGGGGCTACGAT

>Bcin12g03020 (MLST8), partial sequence [organism=Botrytis fabae, strain G12\_B03B]

CGATTGGCTGCGAAGAAAAGTGCAGCACCAGTCCACAAAAGCAGCAATAAACCATCGGCAAGAGAAATATTTCTCTGAACCACAACATGACA  
CGAGCGCGAAGAGTATATCGGGCGAGAAGCTTCATCAAGAGCACAAAGCGACAACGAGTCGATGATAAATTATAACTCTTACGGTGAAGAAA  
TGAAAATACAGCAGCTTATGCTTCCGGGAAAAGTCCATCTGGAAAGTATAAATGTTGGTGGAGGTAGGAAGACCACCTTTTCAAGAAGAACCACGA  
ACGGCATTGTGCTGGTAAAGTTGCCCCCTGGAAAGTATCAACATTTGGTGGAAAGAGGCTACCCAAATCGAGGACGAGGGTAGAGCAGCTTATG  
CTTCCGGAAAATGCTCCAGGAAGTATAAAGTCTGGCGCAAAGAGGCGATTTTCATTTCCAAGATGAAACGAGACCGGCTTATGTCTCCGAAA  
GCTTCCACATGGTAGTATCGACAGTATGCGAAACCGTGAATGGCTGCCGTCCACCGCGAAAATGCTGAGGGTGGGAGGAAACCAGGCCAGGTT  
GTCTCTTCTCTATTCACATTCATCTACTTCAAAGAAAACCTTCGATGAACCCGAAAGAACAAAGCGGAACCGGCAAACCATCCAATGCGCCTT  
TGACAGAGGAAAATGGCGACTTTACCAATCTAGGGTTATCGAGAAGGCTTGCAGCCATCTATCGACTAAACTCGATATGAAAGCCCCGACAGC  
CATTCAAAAAGCATCTGTACAGCAGTTGGTATCGGACGATAGCGATGCTTTCATACAAGCAGAGACTGGATCTGGAAAAGTCTTGGCATATCTA  
CTACCTATAGTCGAGCGAATATTAGCATTGAGTGAGAATGGCGTACAAA

>Bcin02g07770 (MLST9), partial sequence [organism=Botrytis fabae, strain G12\_B03B]

CAGCTTTCCCTTTCCGCTTGGCATCTACAGTCATTGCCATCCCTACACCATCACAACCTTGAGTCTCGGGCCGTTATCGATTCCGATGCCGTTG  
TAGGATTTGCCGAAACTGTTCCAGTGGGACCGTAGGAACAGTTTATGAGGCATATAAACCATTCCCTTAAAGTCGTAATGGATGCGTACCATT  
CCCTGCCGTCGATGCATCGGGTAACACAGGGTATGTCCCTTATACTTTTCTCTTCCACACGATTGCTATTGAGTCTCTAACATATTTTAGTGGTG  
GTTTGTACCAACTGGCAGTAGCAATGGTGGTTGCAGCAGCAGTACCGGTCAAGTATACGTTTCGAGGAGGACAAAGCGGATCAAACCTACGCTAT  
CATGTACTCTGGTAAAGTCTCTCTAAACTTCTCCTTATAGATTCAACCTAACAAAATCTTAGGTACATGCCAAAGGACGAGCCCTCAACCGGT  
ATTTGGTCAACGTCACGATTGGGAAGGTGTAATTTGCTGGCTCTCAAGCGCCACCGCCACAACCTGCCGACAACATCTTAGCCGTTTGTCTTCCG  
CCCACGGAGGCTGGGATTGTTCCACCGATGGCTATTTCCCTTTCTGGTACCAGCCCTCTTATCAAGTACGAAAGTATCTGGCCCGTCGATCATTC  
AATGGGTCTTACTAGTACTGTTGGTGGAAAACAACCTTTGATTGCTTGGGAGTCTTTACCAACCGCTGCTCAAACCTGCTCTTGAGAACACCGAT  
TTCGGTGTGCGAATGTTCCATTCATTCGGCTGTTTTACAGATAATCTT

>Bcin04g02090 (MLST10), partial sequence [organism=Botrytis fabae, strain G12\_B03B]

GCGGAGGATGATATGGCAAAGTCTATGATTACCAAAGCATTGTAGGCATGAGTAGTAAACTGTGCAATATGACTATGAATGATGTTTACAAGC  
CCTACATCCATGTAAGAAATGTAGAATAGAGAGATCAGTAACTGGAACATAATATCGTTTGCAGGCTTTCAAGTTACTTACGCAGTTCAACCCAA  
TCACTACAGCTATTGCCGAATCCCCACTATTTCAAATGGCTGTCTCAGCAAATACCATCGAAAAGTACACACTGCTAGGCCCTTTCTTTCAGAAT  
ATCTCTCTGCAACAGGAAGTTACCAGGAATACTTCAGTGCGCCAAAGACGATAGATAGGCGACACATTGCCACATCTCAAGATGCGTTACGA  
TTGACCTTACAAAACCATCAAAAAGATTTACTTGGATATCATCAACCACTTTGTTTCGAGCAAGTCCAATCGCAAAAAGCAAACCCCTGGATTGGT  
TCGCCTACATTTGTAATCAAAAATCACAAACGTCGAGCACTTCAGGTAGACCCGAAAGAGTGTCTTCTGATGGCTTTATGCACAATGTCAGTGT  
CGTTCTAGATGGTCTTTGTGAGCCATTCATGGATACCACATTTCTCGAAAATTTTCGAAGATTGATATTGATTATCTAAGACGTGCGCCTCGTGTA  
GATATCAAGGACGAGACCAAGTTGAACGCTGACGAGAAGGCTTCTGAGAAGTATTATGAGGACACTGTTCTGGCACTTCTAATTTTCTCTCTG  
AGGTCTTCTTCTCACATTTGGCTGCTCATCATTTATGGTAGTGAAGCTCTTAATGCCACGCATAAGAGTCTGGAGAAAGACATCAAATATATTTCA  
AAAGCAATTGACTGCCGTTGAAGCA

>Bcin05g07690 (MLST2), partial sequence [organism=Botrytis pseudocinerea, strain D08\_H\_8\_15]

ACCACCTATACCAAGTCTCTTTCTGCACTTTCCCTCATCAAAAACGAACGAGAACATCATCAATAAATACTTTGCTGAAGTAATGGGTTTTATT  
TTGGCCAGGATGCCTTCTCTCTACGACAGCAAGCCTTCGATGATATGTTGTGGGTAGTTCTTGGTTGGTTGGATACTGTCAAATTCATTGATTT  
ACATTCTGAATTGCACTATTCAAATGACTCTCAGCCAGAATGGTACGGACAACAATATAAACCCTGCATTTGCACATCGAGCGGACTATTTTGG  
GAATTGGCGTCACAAGGATGGGATACTACTCTCTGTGGTGGTGGATGATATGGTCACCATACTTACTCCATAACAAGAACGCAATTTACCAATG  
AACTCTATATCGCAGCTTCGATATCGATGTACCTCTATTTCCCTGGAGATGACAATCAATCCCCATTTATGCTTTCCAACCCCTTCATATCCACC  
TCGCGATCCGAAATATCTACAGGCAGCTGTTGATGCTTACAAATGGCTGAATGGTTCCAATATGACGGATTTACAAGGATTATATGTCGACGGA  
TATCATATCTCGAATCTTCTGGCGGTGAAAACACCCATTTGCATTTCTAGAAATGAGATGGTATATACCTACAATCAAGGTGTTTTGCTTACTG  
GACAACGTGGTTTTGATGACGCAACCGCCGACGATCATACCTTTGTGGATGGCCACAAAATCATCGCGAATGTTATTAACGCCACAGGCTATGA  
TCTGAAAACACGATGTTGTTATCTCACCGCCACCCAAAAGATGGTTCCGCATTTGGCAAAAATGGTTTGGCCCTGGGTAGGAATGGAATACCTGGAAGAA  
GGTGCATTTCAAGTGTCTCGTGTCTCAAAAATGGACAAAATTTCAAAGGCATATTTCTTTCATCACTTGTATTGCATTTCTGTAGTATTGCCAGG  
GAGCCTATTGCAAGGACGAAAGAAAGCCTGGAACCTGACAGAGAGTGGCATTCTGACAAAATGCTCGCAGTATACAAAAT



>Bcin06g01710 (MLST3), partial sequence [organism=Botrytis pseudocinerea, strain D08\_H\_8\_15]  
GTGAGTCCGGCTTTTGTATCTGAGCGTTAAGATAGACACTGATATACCAAGGCAATCACCTAATTTTCATGGCTTTCTTCCCTGCATCATCTACC  
TACCCTGGAATGCTTGGAGAATTATACTCCGCAGCTTTCACAGCTCCTGCTTTCAATTGGATCTGTTCCCTGCTGTGACAGAATTGGAGACGG  
TTGTAATGGATTGGCTGGCCAAGCTTCTCAATCTCCAGACTGTTATTTGTCTTCGACTCATGGTGGTGGTGTATCCAAGGATCAGCCTCGGA  
AGCTATCGTTACCGTTATGGTTGCTGCCCGGATAAAATATCTTCGTGAACTACTGAAGTCTGTCAGGCATTGAACTCGAGGATGCGATTGCA  
TATAAGAGGAGTAAGCTAGTTGCACTAGGAAGCGAAATGGCACACAGCTCCACGCGAGAAAGCAGCGCAGATAGCTGGCGTTAGATTCCGATCGA  
TTCCAGTACTCGCATCCAATGATTTCCGCATGACGGGTGATGATCTAGAGAAGGTATTGAAAGAATGCAAATCTCAAGGATTGGAACCCCTCTA  
TCTAACTTCGACTTTGGGAACAACATCTACATGTGCAGTTGATGACTTCGCATCTATCGCAACAGTACTTTGAAAATATGCACCTCCAGATGTT  
GCAGGCGAGATATGGGTTACGTCGATGCTGCTTATGCAGGCGAGCTTTGGTTTGCCTGAATACCATCATCTAACATCGTCCCTCCAGCATT  
TTCATTCCTTCGATATGAACATGCACAAATGGCTTTTGACAAATTTGACGCTTCTTGCTATATGTCAAGAAACGCAAAGATCTGATCGATGC  
ACTCTCTATAACACCAAGTTATCTTCGCAACGAGTTTTCAGAGAGTGGACTCGTGACCGACTATCGGGACTGGCAAATTCCTCTCGGAAGACGC  
TTCCGAAGCTTAAAGATTTGGTTTGTCTCAGAACCCTAC

>Bcin09g03030 (MLST4), partial sequence [organism=Botrytis pseudocinerea, strain D08\_H\_8\_15]  
ACCCTTCAATCCCACCGCAGCTCCTATACCGAAAGCGAGCATCTTACCAATTCTCCTTCCACCTGCGACTTTAAGACCATTGGCTTTTTCGCACT  
TTCACAAAAAAGCATAGTTTAAACATTGACGTCGTCGCATTACAAGTGTGGCTACTTTTATTTGGAAAGCATTGTGGGACAGGATGGAGGGAAG  
AAGGACTGGCAGAGAGAGTTTTAGAGGAGGTCGCCAAGAGTTGGAAGAATAGGAGTGGTGGTGTATTGTGTCAGGGGCGAGGGAACGGAATTGAA  
GGAGATTCTGAAAGCTTTGGAAGGGAATATGAGTGGTGGAAAGGATAGTCGTAGGAAGAGAGCTAAGCCGGCAGAACAGTTTAGTACTGGATCAT  
CACAATATGGAGAGGTCAATCATACAAGACTTGGGCTACGGCCAGGGAATATACCCAGAGAGGATAGTCAGTCAAGTTTGGGAATGTCAACGTT  
GGAGGTCAATGACGAGGAAGATGAGGATGGCTGATGGATCCAAGGAGGTGGTTGAAAGTCAATTGATGCATTCGAGCAACCCCGACTGGTGTAT  
AATGTTGCTAAGAAGCACTTTGATAGGTATGTTTCAATGATAAAATTTTATCTGAATCAACTAACTCAGTACAGAGATACCTCCAAACCTTCAT  
TGTTCCACCTGCGTCTCATAAAACACTCCTCTTCCAAAACCGCTATAATGATATCCATCAACGTCTCCTTCGCAATGAATCTTTTCAAACGCC  
CGCTTTTCAAGGTGGCAAAGCTTCCCTTCAACGCAGCACGTCGCCATTACCACTCAACAACAATCATACAAATTAACGCCGATAGCTAATCTT  
CTCGGTGCAATCGCAGCTCTCATATGCTTCTCGGCTCCTCAGCATTTACCCACTGGTACCCTCGCCATCAATGACCTGACGGGCAGCATCG  
CTCTCGATCTTACACACGCAGCAGCCATTC

>Bcin11g01310 (MLST5), partial sequence [organism=Botrytis pseudocinerea, strain D08\_H\_8\_15]  
ACTGACATGGACTTCATGTGGAACCGGCGTACAATGCGCAACGCTTGAAGTTCGCTCGAATATGGCGATGCAACGTCAACAGCGAAAGCCAGT  
ATTGCGCTTGCTCGTTATCCTGCCACTGTTGCCGCGAGCAAGAAGCTCGGGTCTCTCTTGATAAAATCCCGGTGGACCCGGTGCCACTGGTGTG  
GCTTTGTGCAGTCTGGAGCCGGTGCCGCATCTCGACACTGAGTGGTGGATTATACGATATCATCGGATGGGATCCACGTGGAACCGGTGCTTC  
CGCTCCTATTTTGGAAATGTTTTCCAAATGCCAGTGGGAGTATGATTTTAAACAACGCGTTTCCATCTGCTCCCAATCTCTGGCTCGGACAATTT  
TCAAATGCCAGCGCAAATTTCTGCCGTTAGCTCTGCTATCACATCTTTTGCACACTCTGTGCTGCTCTTGCAAAAAGCTTGTGTAGCTCAGAAGT  
CCCCCGCTCTTTACACCTCAACAGCAGCATATGTTGCTCGAGACATGGCAGCGATAGTCGATGCCTTGGATGGAACCTCTGCAAACTCAACTA  
CTGGGGTTTCTCATATGGAACATTTTTCTTGGCAGTTTATCCAACTTTCCAGCCGCGTGGGAAGAGTCTTGGCCGATGGGGTTTTTCGAC  
GCAAAGGCAAATGCACTCACATACGTTAGCCAACCTCCCAACGATCAACTCAGTGTTCGTGCTTCGTTGAACGATTTTGCAGCTTTCTGTACCA  
CCGCCGGTAGTAAAGGTTGCTCTTTTGGCACC GCCCTACTGGAACCACCGGTACCCTTGTACCAGACTGGACAACATAATGAAGGATATGTT  
CCTCAATCCCATTGTTGCTTCGGGCTTAAAGCATCA

>Bcin15g03910 (MLST6), partial sequence [organism=Botrytis pseudocinerea, strain D08\_H\_8\_15]  
GCCAAACACAAAATCATCCAACGATGAAGATGATACTCCACTGCCCTTAATTATCTGGCACGGACTCGGCGATAATTACAAAGCAGGATGGTCTT  
GCGCAAGTTGAAAGCTAGCTGAAGCTATTTCATCCTGGGACTTTTGTCTATAATATTCATGTAGATGAGGATGCATCTGCAGATAGGACAGCTA  
CCTTCTTTGGAAATCTCACTCGTGGGTACATCCCCTAGTCTTCTTTTAAATGCCATGCTGACTCTCTTACCAAGTTCAAATCGAAAAGGTCTGC  
GAAGACCTCGCCTCCCATCCTATTTCTCTTACC GCGCTGCCGTCGACGCAATCGGATTTCTCCAAGGCGGCCAATTTCTTGC GCGGTTACATAT  
CCCGCTGCAATTTCTCCACCCATCCGCTCTCTCCTGACCTTCGGTTCCCAACACAACGGCATTCTGCTTCCAAGCCTGTGGTCTCGCCGATTT  
CCTCTGTGCTGGTGTCAAACCTTTTTCGATCCAACACCTGGTCAACCTTTGTCCAATCTCGTCTCGTACCCGCTCAATACTTCAGAGATCCG  
GAAAACCTAGACTCTTACCTTGAATATTTCCAATTTCTTGGCCGACATCAATAATGAGCGCGTTCTCAAGAACCAAACATATAAATCCAACATGG  
AAAAATTTGGAACGATTCTGTAATGTATGCTTTTGAAGATGATACTGTCATCCCTAAGGAAAGTGGACGGTGGGCTGAAGTCAACGGCACGGGA  
AGTTACACCACTGAAGAAAGAGCCATTTATAAGGAAGATTGGCTAGGTTTAAAGACATTGGATGAGGCCGAAAAATTAGTTTTTCGAAACCATT  
CAGGGGACATATGACGTTAGGAGAGGAGATGCTAGAGAAGGCTTTCAAAGAGTACTTTGGCCCAGCAGGGAAGAAATTTGGG

>Bcin16g03460 (MLST7), partial sequence [organism=Botrytis pseudocinerea, strain D08\_H\_8\_15]  
ATGAACCTCTTAATTTGAACTCTTCATTAATCGCAAGTATGAACCCCTATTTTGGCCAGAGGATAGTTACAAGACGTATATCATTAGTTCGAGA  
ACCACCTCATGATATATATTTGACGGATTTTGTAAAAGCGAATGAAAAGTAAACATCTGGTTGATGTTAGGTATGTTACTTATTTCTGATGAAATGAAC  
AAGAGAAAATGATGAGATAGTGAACCGCTTTATGAACCGTCTACTGTTTCTCACGGACAGGAAGTTACCATTGATACTTCAGTTTCGAAATTCGG  
AAGTGGCGGTTTTAGAGAGGGATGAGGTGGTCAGGTGTATTGAGCATAGAGCGAGGCATTTTCAGGGTGGAGGGATGAGATGGGGATTGAGAA  
GTTGAGGACGCAGAGGTATGGGGTTGGAGGACATTATGGGATGCATTTGTAAGTTTTGGGGATTGACGAAGGCTTTTGTCTATTTCTTATCAG

TACGGATCTTAAAAGAAAAGATAGCATGAACACGAGGGCTAACAACTAGGAAATAGCGATTGGAGCGGAGGTAAACGTGGCATAGACCGATTTAG  
TACTTTTCATGGTCTATGTGACGTATCTTCTGATATCGAAGGTGGAGGAACGGAATCCCACGTATTGTGGGACCACAAGGAGGAAGGTGGGAG  
GAATTCCTGGAACTACGGAAGCATTTGGATCCAAGAACTGGAAAAAATGTAAACAGTAGAAGGGGTGACATTCAAACCAATCAAGGGAAATGCCG  
TATTCTGGGAAAAATACTGACAACAACGGGAGGGGATATGAT

>Bcin12g03020 (MLST8), partial sequence [organism=Botrytis pseudocinerea, strain D08\_H\_8\_15]  
CGATTGGCTGCGAAGAAAAGTGCAGCACCAGTACCCAAAAGCACGAATAAACCGTTCGGCAAGAGAAAATATCTCTGAACCACAACATGACA  
CGAGCGCGGAAGAGTATATTGGGCGAGAAGCTTCATCAAGAGCACCAAAGCGACAACGAGTCGATGATAATTATAACTCTTACGGTGGAAAGAAA  
TGAAAATACAGCAGCTTATGCTTCCGAAAAGTTCATCTGGAAGTATAAATGTTGGTGGAGGTAGGAAGACCCTTTTCAAGAAGAACCCTCGA  
ACGGCATTGTGCGTGGCAAGTTGCCCTTGGAAAGTATCAACATCGGTGGAAAGAGGCTACCCAAATCGAGGACGAAGGAAGAGCAGCTTATG  
CTTCCGGGAAAATTTGCCCCAGGAAGTATCAGCTCTGGCGCAAAGAGGCCATTTTCATTCCAAGATGAAACGAGACCGGCTATGTCTCTGAAA  
GCTCCACATGGCAGTATCGATGGTATGCGAAAACCGCGAAAATGGCTGCCGTCCACCGCGAAAATGCTGAGGGTGGGAGGAAACCAGGCCAGGTT  
GTCTCTCTCTATTACATTCATCTACATCAAAGAAAAGTTCGATGAATCCGAAGAACAAGCGGAACCTGCAAACCATCCAATGCGCCTT  
TGACAGAGGAAAATGGAGACATTCACCAATCTAGGATTATCGAGAAGGCTTGCAGCCATCTATCGACTAAACTCGATATGAAAGCCCCGACCGC  
CATTCAAAGAGCATCTGTGCAGCAGTTGGTATCGGACGATAGCGATGCTTTCATACAAGCAGAGACTGGATCTGGAAAAAGTTCGGCATATCTA  
CTACCTATAGTCGAGCGAATATTAGCATTGAGTGAGAATGGCGTACAAA

>Bcin02g07770 (MLST9), partial sequence [organism=Botrytis pseudocinerea, strain D08\_H\_8\_15]  
CAGCTTTCCCTTTTCGGTCTTGGCATCTACAGTCATTGCCATGCCATACACCATCACAACTTGAGTCTCGGGCCGTTATCGATTCCGATGCCGTTG  
TAGGATTTGCCGAAGCTGTTCCAGTGGGACCGTAGGAACAGTTTATGAGGCATATAAACCATTCCTTAAAGTCGTAAATGGATGCGTACCATT  
CCCTGCCGTCGATGCATCGGGTAACACAGGGTATGTCTTATACTTTCTCTTCCCTCAGATTGCTATTGAGTCTCTAACATATTTTAGTGGTG  
GTTTGTACCAACTGGCAGTAGCAATGGTGGTTGCAGCAGCAGTACCGGTCAAGTATATGTTTCGAGGAGGACAAAGCGGATCAAACCTACGCTAT  
CATGTACTCTGGTAAGTCTCTCTTAACTTCTCCTTATAGATCCAATATCTAACAGAATCTTAGGTACATGCCAAAGGACGAGCCCTCAACCG  
GTATTGGTCACCGTCACGATTGGGAAGGTGTAATCGTCTGGCTCTCCAGCGCCACCGCCACAACCTGCCGACAACATCTTAGCTGTTTGTCTTC  
GGCCACGGAGGCTGGGATTTGTTCCACCGATGGTTATTTCCCTTTCTGGTACCAGCCCTCTTATCAAGTACGAAAGTATCTGGCCCGTCGACCAT  
TCAATGGGTCTTACTAGTACTGTTGGTGGACAACAACCTATGATTGCTTGGGAGTCTTTACCTACTGCTGCTCAAACCTGCTCTTGAGAACACCG  
ATTTCCGGTCTGCGAATGTTCCATTTATTCAGCTGTTTTTCACAACAATCT

>Bcin04g02090 (MLST10), partial sequence [organism=Botrytis pseudocinerea, strain D08\_H\_8\_15]  
CGGAGGATGATATGGCAAAGTCTATGATTACCAAAGCATTTGTAGGCATGAGTAGTAACTCTCAAATATGACTATGAATGATGTTTACAAGCC  
CTACATCCATGTAAGAAAATGTAGAATAGAGAGATCAATAACTGGAATAATATCGTTTGTAGGCTTTCAAGTTACTTACGCAGTTCAACCCAAT  
CACTACAGCTATTGCCGAATCCCCTACTATTTCAAATGGCTGTCTCAGCAAATACCATCGAAAAGTACACACTGCTAGGCCCTTTCTTTCAGAATA  
TCTCCTCTGCAACAGGAAGTTACCAGGGAATACTTCAGTGCACCAAAGACGATAGATAGGGCGACACATTGCCACATCTCAAGATGCGTTACGAC  
TGACCTTACAAACCCATCAAAAAGATTTACTCGATATCATCAACCCTTTGTTTCGAGCAAGTCCAATCGCCAAAAGCAAACCTTGGATTGGTT  
CGCTACATTTGTAATCAAATCAAAAGCGTCGAGCACTTCAGGTAGACCGAAAAGTATCTTCTGATGGCTTTATGCACAATGTCACCTGTC  
GTTCTAGATGGTCTTTGTGAGCCATTCATGGATACCACATTTCTCGAAAATTTCGAAGATTGATATTGATTATCTAAGACGTGCGCCTCGTGTAG  
ATATCAAGGACGAGACCAAGTTGAACGCCGATGAGAAGGCTTCTGAGAAGTACTATGAGGACACGGTTCTGGCACCTTCCAATTTTCATCTCTGA  
GGTGTCTTTCTGACATTTGGCTGCTCATCATTTATGGTAGTGAAGCTCTTAATGCCACGCACAAGAGTCTGGAGAAAGACATCAAATATATTCAA  
AAGCAATTGACTGCCGTTGAAGCA

>Bcin01g07220 (MLST1), partial sequence [organism=Botrytis pseudocinerea, strain D08\_H\_8\_17]  
ATGGCATATCTTGTCTTTTTCGCATTATGCTTTGGAACGTGCTGGACAAGCTTGGGTTAGTGCCTGCGTGTAGAAGCACTAAAGAAGATTCT  
TGCACAACCGAAGTCGTGGTTTGGAGAAATCCAGGAATTCACCTGGCCGATTGAACGAAGTTTGGATAGGAACCTGAGGAAATGCGTAATCTC  
GTTGGCCGCTTTGTTGGTATTGTAATCAGCATTTTTTATGTTATTGATATCAATCATTTGGGCTTTCTGTAATACGTGGAAGCTGACATTAG  
TCTCAATGGCAAATGGGCCAGTTATATACGCTGTCAACAAAACGTTCAATCGCGTGAGTGGAAAATGGGAAAACAAGTGAACCTACGCATCTGA  
AATGACCACTAGCATATTTTCAGAGACGTTCTCCAACATCAAAGTGGTTCGGGCTTTTACTCTGGAACCTTACTTTGCGACAAAACACACCAA  
GCTACAGAAGAACTTTATAAAGTTGGACTAATACGAGCAAACCTACTCGGATGCTGTGGGATTTGACAGACGCGATGTCATTTTCATCACTG  
CAACTATCTTTTATTATGCCACGGTTCTCATTACCAAGAGAGAGATCAGTATCGCGACTGCACCTACAGACTGTCAATCTTCTATTTATTTGGTAT  
TTCTAATAGTACGAATATGCTGGCCATGATACCACAAAATCAACTCTTCTCGCGTTACAGCTACGCATATGCTTGCATTAGCCAATCTCGATTCA  
TCTTCTCCACGAAAATCAAGGAACCGAAGCACTTTTCGACAATCTTTCCAATCAAATTCACCGTCTCTCATTCACATATCCTAATCGTCTG  
AAAAACGAACGATATCATCTTTTCCCTTTCCCTGATTCCTAACACAACAACCTGCATTTGTCGGACCCCTCCGGCTCCGAAAATCTACAATAGC  
TGCTCTGCTCATTGGCCTCTATCCACCAGATACTTCAACACCTCCACCGTTGACATTCATTCGCGTCCCCATAAGTAACTGTCACATCCCGTCT  
CTCCGGGCTTCTGTCTCACTCGTCCACAAAATACCGATTTCTATTTCCAGCTACCATTCTCCATAACATCATTTATGGGCTCCGAAATCTTCTC  
CTTGTGCTAATCTTCCATCTGCTATTGTATCAGCCAAAGATGCTGGGATCCATGAGTTTATCACATCGCTTCCACAAGGTTATAATGCTAT

>Bcin05g07690 (MLST2), partial sequence [organism=Botrytis pseudocinerea, strain D08\_H\_8\_17]  
ACCCTATCACCAAGTCTTTTCTGCACTTTCCCTCATCAAAAACGAACGAGAACATCATCAATAAATACTTTGCTGAAGTAAATGGGTTTTATT  
TTGGCCAGGATGCCCTTCTCTTACGACAGCAAGCCTTCGATGATATGTTGTGGTAGTTCTTGGTTGGTTGGATACGTCAAATTCATTGATTT  
ACATTTGAATTCACATTCAAATGACTCTCAGCCAGAATGGTACGGACAACAATAAACCTGCATTTGCACATCGAGCGGACTATTTTGG

GAATTGGCGTCAACAAGGATGGGATACTACTCTCTGTGGTGGTGGGATGATATGGTACCATACCTTACTCCATACAAGAACGCAATTACCAATG  
AACTCTATATCGCAGCTTCGATATCGATGTACCTCTATTTCCCTGGAGATGACAATCAATCCCCATTTATGCTTTCCAACCCCTTCATATCCACC  
TCGCGATCCGAAATATCTACAGGCAGCTGTTGATGCTTACAAATGGCTGAATGGTTCCAATATGACGGATTTACAAGGATTATATGTCGACGGA  
TATCATATCTCGAATCTTTCTGGCGGTGAAAAACCCCATTTGCGATTCTAGAAATGAGATGGTATATACCTACAATCAAGGTGTTTTGCTTACTG  
GACAACGTGGTTTTGTATGACGCAACCGCCGACGATCATACCTTGTGGATGGCCACAACTCATCGCAATGTTATTAACGCCACAGGCTATGA  
TCTGAAACACGATGTTGTATCTCACCGCCACCCAAAGATGGTTCCGCATTGGCAAAATGGTTTTGGCTGGGTAGGAATGGAATACCTGGAAGAA  
GGATGCGATTCAAGTGCTTCGTGTTCTCAAAATGGACAAAATTTCAAAGGCATATTTCTTTTCATCACTTGATTGCATTTCTGTAGTGATTGCCAG  
GGGAGCCTATTGACAGGACGAAAGAAAGCCTGGAACCTCGACAGAGAGTGGCATTTCTGACAAATGCTCGCAGTATACAAAAT

>Bcin06g01710 (MLST3), partial sequence [organism=Botrytis pseudocinerea, strain D08\_H\_8\_17]  
GTGAGTCCGGCTTTTGTATCTGAGCGTTAAGATAGACACTGATATACCAAGGCAATCACCTAATTTTCATGGCTTTCTTCCCTGCATCATCTACC  
TACCCTGGAATGCTTGGAGAATTATACTCCGCAGCTTTACACAGCTCCTGCTTTCAATTGGATCTGTTCCCTGCTGTGACAGAATTGGAGACGG  
TTGTAATGGATTGGCTGGCAAGCTTCTCAATCTCCAGACTGTTATTTGTCTTCGACTCATGGTGGTGGTGTATCCAAGGATCAGCCTCGGA  
AGCTATCGTTACCGTTATGGTTGCTGCCCGGATAAAATATCTTCGTGAACTACTGAAGGTCTGTCAGGCATTGAACTCGAGGATGCGATTGCA  
TATAAGAGGAGTAAGCTAGTTGCACTAGGAAGCGAAATGGCACACAGCTCCACGCGAGAAAGCAGCGCAGATAGCTGGCGTTAGATTCCGATCGA  
TTCCAGTACTCGCATCCAATGATTTGCCATGACGGGTGATGATCTAGAGAAGGTATTGAAAGAATGCAAACTCAAGGATTGGAACCCCTCTA  
TCTAACTTCGACTTTGGGAACAACATCTACATGTGCAGTTGATGACTTCGCATCTATCGCAACAGTACTTTGAAAATATGCACCTCCAGATGTT  
GCAGGCGGGATATGGGTTACGTCGATGCTGCTTATGCAGGCGCAGCTTTGGTTTGGCCCTGAATACCATCATCTAACATCGTCTTCCAGCAT  
TTCATTTCTTCGATATGAACATGCACAAATGGCTTTTGACAAATTTGACGCTTCTTGTCTATATGTCAAGAAACGCAAAGATCTGATCGATG  
ACTCTCTATAACACCAAGTTATCTTCGCAACGAGTTTTCAGAGAGTGGACTCGTGACCAGTATCGGGACTGGCAAATTCCTCTCGGAAGACGC  
TTCCGAAGCTTAAAGATTTGGTTTGTCTCAGAACCCTACGGA

>Bcin09g03030 (MLST4), partial sequence [organism=Botrytis pseudocinerea, strain D08\_H\_8\_17]  
ACCCTTCAATCCCACCGCAGCTCCTATACCGAAAGCGAGCATCTACCAATTTCTCTTCCACCTGCGACTTTAAGACCATTGGCTTTTTCGCACT  
TTCACAAAAAAGCATAGTTTAAACATTTGACGTCGTCCGCATTACAAGTGTGGCTACTTTTATTTGAAAAGCATTGTGGGACAGGATGGAGGGAAG  
AAGGACTGGCAGAGAGAGTTTTAGAGGAGGTCGCCAAGAGTTGGAAGAATAGGAGTGGTGGTGTATTTGTGTCAGGGGCGAGGGAACGGAATTGAA  
GGAGATTCTGAAAGCTTTGGAAGGGAATATGAGTGGTGGAAAGGATAGTCTGAGGAAGAGAGCTAAGCCGGCAGAACAGTTTAGTACTGGGATCA  
TCACAATATGGAGAGGTCAATCATAACAAGACTTTGGGCTACGGCCAGGGAATATACCAGAGAGGATAGTCAAGTTTGGGAATGTCAACGT  
TGGAGGTCAATGACGAGGAAGATGAGGATGGCCTGATGGATCCAAGGAGGTGGTTGAAAGTCATTGATGCATTTGAGCAACCCCGACTGGTGT  
TAATGTTGCTAAGAAGCACTTTGATAGGTATGTTTCAATGATAAAAATTTTATCTGAATCAACTAAGTACAGAGATACCTCCAAACCTTCA  
TTGTTCCACCTGCGTCTCATAAAACACTCCTCTTCCAAAACCGCTATAATGTTATCCATCAACGTCTCCTTCGCAATGAATCTTTTCAAACGC  
CCGCTTTTCAAGGTGGCAAAGCTTCCCTTCAACGCAGCAGCTCCGCCATTACCCTCAACAACAATCATACAAATTAACGCCGATAGCTAATCT  
TCTCGGTGCGAATCGCAGCTCTCATATGCTTCTCGGCCCTCCTCAGCATTTCAACCCTGGTACCCTCGCCATCAATGACCTGACGGGCAGCAT  
GCTCTCGATCTTACACACGCAGCAGCCATT

>Bcin11g01310 (MLST5), partial sequence [organism=Botrytis pseudocinerea, strain D08\_H\_8\_17]  
ACTGACATGGACTTCATGTGGAACCGGCTACAATGCGCAACGCTTGAAGTTCCGCTCGAATATGGCGATGCAACGTCAACAGCGAAAGCCAGT  
ATTGCGCTTGCTCGTTATCTGCCACTGTTGCCGCGAGCAAGAAGCTCGGGTCTCTTTGATAAAATCCCGTGGACCCGGTGCCACTGGTGTG  
GCTTTGTGAGTCTGGAGCCGGTGCCGCATCTCGACACTGAGTGGTGGATTATACGATATCATCGGATGGGATCCACGTGGAACCGGTGCTTC  
CGCTCCTATTTTGGAAATGTTTCCAAATGCCAGTGGGAGTATGATTTTAAACAACGCGTTTCCATCTGCTCCCAATCTCTGGCTCGGACAATTT  
TCAAATGCCAGCGCAAATTTCTGCCGTTAGCTCTGCTATCACATCTTTTGACACTTCTGTGCTGCTCTTGCAAAAAGCTTGTGTAGCTCAGAAGT  
CCCCGCTCTTTACACCTCAACAGCAGCATATGTTGCTCGAGACATGGCAGCGATAGTGCATGCCTTGGATGGACCTCTGCAAAAACCTCAACTAC  
TGGGGTTTTCTCATATGAACTATTTTCTTGGCAGTTTATCCAAACTTTCCAGGCCGCTGGGAAGAGTTCTTGGCGATGGGGTTTTTCGACG  
CAAAGGCAAATGCACTCACATACGTTAGCCAACTTCCCAACGATCAACTCAGTGTTCGTGCTTCGTTGAACGATTTTGCAGCTTTCTGTACCAC  
CGCCGGTAGTAAAGTTGCTCTTTTGCCACCGCCCTACTGGAACCACCGGTACCGTTGCTACCAGACTGGACAACATAATGAAGGATATGTT  
CTCAATCCCATTTGTTGCTTCGGGCTTAAAGCATCA

>Bcin15g03910 (MLST6), partial sequence [organism=Botrytis pseudocinerea, strain D08\_H\_8\_17]  
GCCAAAACACAAAATCATCCAACGATGAAGATGATACTCCACTGCCCTTAATTTATCTGGCAGGACTCGGCGATAATTACAAAGCGGATGGTCT  
TGCGCAAGTTGGAAAGCTAGCTGAAGCTATTCATCTGGGACTTTTGTCTATAAATTTTCATGTAGATGAGGATGCATCTGCAGATAGGACAGCT  
ACCTTCTTTGAAAATCTCACTCGTGGGTACATCCCTAGTCTTCTTTTAAATGCCATGCTGACTCTCTACCAAGTTCAAATCGAAAAGGTCTGC  
GAAGACCTCGCCTCCCATCTTCTCTTACCGCGCTGCCGTCGACGCAATCGGATTTCCCAAGCGGCCAATTTCTGCGCGTTACATAT  
CCCGCTGCAATTTCCACCCATCCGCTCTCTCTGACCTTCGGTTCCACACAACGGCATTTCTGCCTTCCAAGCCTGTGGTCTGCCGATTTCT  
CTCTGTGCTGGTGTCAAACCTCTTTTGGGATCCAACACCTGGTCAACCTTTGTCCAATCTCGTCTCGTACCCGCTCAATACTTCCAGAGATCCGG  
AAAACCTAGACTCTTACCTTGAATATTTCAATTTCTTGGCGACATCAATAATGAGCGCGTTCTCAAGAACCACCAATATAAATCCAACATGGA  
AAAATTGGAACGATTGTAATGTATGCTTTGAAGATGATACAACCTGTCATCCCTAAGAAAGTGGATGGTGGGCTGAAGTCAACGGCACGGAAG  
TTACACCCTGAAAGAAAGAGCCATTTATAAGGAAGATTGGCTAGGTTTAAAGACATTTGGATGAGGCCGAAAATTTAGTTTTCGAAACCATTCCA

GGGGGACATATGACGTTAGGAGAGGAGATGCTAGAGAAGGCTTTCAAAGAGTACTTTGGCCCAGCAGGGAAGAAATTTGGG

>Bcin16g03460 (MLST7), partial sequence [organism=Botrytis pseudocinerea, strain D08\_H\_8\_17]  
CATGAACCTCTTAATTTGAACTCTTCATTAATCGCAAGTGATGAACCCCTATTTGCCAGAGGATAGTTACAAGACGTATATCATTTAGTCGAGA  
ACCCTCATGATATATATTGACGGATTTTGGAAAAGCGAATGAAAGTAAACATCTGGTTGATGTTAGGTATGTTACTTATTTCTGATGAAATGAA  
CAAGAGAACTGATGAGATAGTGAACCGCTTATGAACCGTCTACTGTTTCTCACGGACAGGAAGTTACCATTGATACTTCAGTTTCGAAATTC  
GGAAGTGGCGGTTTTAGAGAGGGATGAAGGTGGTTCAGGTGATTTGAGCATAGAGCGAGGGCATTTCAGGGGTGGAGGGATGAGATGGGGATTGA  
GAAGTTGAGGACGCAGAGGTATGGGGTTGGAGGACATTATGGGATGCATTTGTTAAGTTTTGGGGGATGACGAAGGCTTTTGTCTATTTCCCTA  
TCAGTACGGATCTTAAAAGAAAGATAGCATGAACACGAGGGCTAACAACTAGGAAATAGCGAATTGGAGCGGAGGTAAACGTGGCATAGACCGA  
TTTAGTACTTTCATGGTCTATGTGCGACGTATCTTCTGATATCGAAGGTGGAGGAACGGAAATCCCACGTATTTGTGGGGCCACAAGGAGGAAGG  
TGGGAGGAATTCCTGGAAACTACGGAAAGCATTGGATTCCAAGAACTGGAAAAATGTAACAGTAGAAGGGGTGACATTCAAACCAATCAAGGGA  
AATGCCGTATTTCTGGGAAAATACTGACAACAACGGGAGGGATATGAT

>Bcin12g03020 (MLST8), partial sequence [organism=Botrytis pseudocinerea, strain D08\_H\_8\_17]  
CGATTGGCTGCGAAGAAAAGTGCAGCAGCCGAGTCACCAAAAGCACGAATAAACCGTCGGCAAGAGAAAATATTCTCTGAACCACAACATGACA  
CGAGCGCGGAAGAGTATATTGGGCGAGAAGCTTCATCAAGAGCACCAAGCGACAACGAGTCGATGATAATTATAACTCTTACGGTGGAAAGAAA  
TGAAAATACAGCAGCTTATGCTTCCGGAAAAGTTCATCTGGAGTATAAATGTTGGTGGAGGTAGGAAGACCACCTTTTCAAGAAGAACCCTCGA  
ACGGCATTGTGCTGGCAAGTTGCCCCCTGGAAAGTATCAACATCGGTGGAAAGAGGGCTACCCAAATCGAGGACGAAGGAAGAGCAGCTTATG  
CTTCCGGGAAAATGCCCCAGGAAGTATCAGCTCTGGCGCAAAGAGGCCATTTTCATTCAGATGAAACGAGACCCGGCCTATGTCTCTGGAAA  
GCTCCACATGGCAGTATCGATGGTATGCGAAAACCGGAAATGGCTGCCGTCCACCGCGAAAATGCTGAGGGTGGGAGGAAACCAGGCCAGGTT  
GTCTCTCTCTATTTACATTTCAATCTACATCAAAGAAAAGTTCGATGAATCCGAAGACAAGCGGAACCTGCAAACCATCCAATGCGCCTC  
TGACAGAGGAAAATGGAGACATTCACCAATCTAGGATTATCGAGAAGGCTTGCAGCCCATCTATCGACTAAACTCGATATGAAAGCCCCGACCGCC  
ATTCAAAAGCATCTGTGCGACAGTTGGTATCGGACGATAGCGATGCTTTCATACAAGCAGAGACTGGATCTGGAAAAGTTCGGCATATCTAC  
TACCTATAGTCGAGCGAATATTAGCATTGAGTGAGAATGGCGTACAAA

>Bcin02g07770 (MLST9), partial sequence [organism=Botrytis pseudocinerea, strain D08\_H\_8\_17]  
CAGCTTTCCCTTTCCGGTCTTGGCATCTACAGTCATTGCCATGCCACCATCACAACTTGAGTCTCGGGCCGTTATCGATTCCGATGCCGTTG  
TAGGATTTGCCGAAGCTGTTCCAGTGGACCGTAGGAACGGTTTTATGAGGCATATAAACCATTCCTTAAAGTCGTAATGGATGCGTACCATTTC  
CTGCCGTCGATGCATCGGGTAACACAGGGTATGTCTTATACTTTCTCTTCCCTCACGATTGCTATTTAGTCTCTAACATATTTTAGTGGTGGT  
TTGTCAACCAACTGGCAGTAGCAATGGTGGTTGCAGCAGCAGTACCGGTCAAGTATAATGTTTCGAGGAGGACAAAGCGGATCAAACCTACGCTATCA  
TGTAATCCTGGTAAGTTCTCTCTAAACTTCTCCTTATAGATCCAATATCTAACAGAATCTTAGGTACATGCCAAAGGACGAGCCCTCAACCGGT  
ATTGGTACCGTACGATTGGGAAGGTGTAATCGTCTGGCTCTCCAGCGCCACCGCCACAACCTGCCGACAACATCTTAGCTGTTTGTCTTCCG  
CCCACGGAGGCTGGATTGTTCCACCGATGGTTATTTCCCTTTCTGGTACCAGCCCTCTTATCAAGTGGCAAAGTATCTGGCCGTCGACCATTCAA  
TGGTCTTACTAGTACTGTTGGTGGACAACAACCTATGATTGCTTGGGAGTCTTTACCTACTGCTGCTCAAACCTGCTCTTGAGAACACCGATTTCA  
GGTCTGCGAATGTTCCATTTATTTCCAGCTGTTTTACAAAACAATCTT

>Bcin04g02090 (MLST10), partial sequence [organism=Botrytis pseudocinerea, strain D08\_H\_8\_17]  
CGGAGGATGATATGGCAAAGTCTATGATTACCAAAGCATTGTAGGCATGAGTAGTAACTCTCAAATATGACTATGAATGATGTTTACAGGCC  
CTACATCCATGTAAGAAAATGTAGAATAGAGAGATCAATAACTGGAACATAATATCGTTTTGTAGGCTTTTCAGGTTACTTACGCAGTTCAACCAAT  
CACTACAGCTATTTGCCGAATCCCCACTATTTCAAATGGCTGTCTCAGCAAATACCATCGAAAAATACACACTGCTAGGCCCTTTCTTTCAGAATA  
TCTCCTCTGCAACAGGAAGTCAACAGGGAATACTTCAGTGCACCAAGACGATAGATAGGCGACACATTTGCCACATCTCAAGATGCGTTACGAC  
TGACCTTACAAAACCATCAAAAAGATTTACTCGATATCATCAACCCTTTGTTTCGAGCAAGTCCAATCGCCAAAAGCAAAACCCCTGGATTGGTT  
CGCTACATTTGTGAATCAAAAATCAAAAGCTCGAGCACTTCAGGTAGACCCGAAAGAGTATCTTCTGATGGCTTTATGCACAATGTCACCTGTC  
GTTCTAGATGGTCTTTGTGAGCCATTTCATGGATACCACATTTCTCGAAAATTTGGAAGATTGATATTGATTATCTAAGACGTGCGCCTCGTGTAG  
ATATCAAGGACGAGACCAAGTTGAACGCCGATGAGAAGGCTTCTGAGGAGTACTATGAGGACACGGTTCCCTGGCATTCCAATTTTCATCTCTGA  
GGTGTCTTTCTGACATTGGCTGCTCATATTATGGTAGTGAAGCTCTTAATGCCACGCACAAGAGTCTGGAGAAAAGACATCAAGTATATTTCAA  
AAGCAATTGACTGCCGTTGAAGCA

>Bcin01g07220 (MLST1), partial sequence [organism=Botrytis pseudocinerea, strain D11\_M\_E27]  
ATGGCATATCTTGTCTTTCTTTTCGCATTATGCTTTGGAACGTGCTGGACAAGCTTGGGTTAGTGTCTCTGCGTGTAGAAGCACTAAAGAAGATTCT  
TGACAACCGAAGTCTATGGTTTTGAGGAATCCAGGAATTCACCTGGCCGATTGAACGAAAGTTTTGGATAGGAACCTCGAGGAAATGCGTAATCTC  
GTTGGCCGCTTTGTTGGTATTGTATTTCACAGCATTTTTTATGTTATTGATATCAATCATTGGGCCCTTCGTGAATACGTGGAAGCTGACATTAG  
TCTCAATGGCAACTGGGGCCAGTTATATACGCTGTCACCAAAACGTTCAATCGCGTGTAGTGGAAAATGGGAAAACAAGTGAACCTACGCATCTG  
AAATGACCACTAGCATATTTTCAGAGACGTTCTCCAACATTCAAAGTGGTTTCGGGCTTTTACTCTGGAAAACCTACTTTGCGACAAAACACACCA  
AAGCTACAGAAGAACTTTATAAAGTTGGACTAATACGAGCAAACCTACTCGGGATTGCTGTGGGGATTGACAGATGCGATGTCATTTCTATCAC  
TGCAACTATCTTTTATTATGCCACGGTCTCATTACCAAGAGAGAGATCAGTATCGCGACTGCACTACAGACTGTCAATCTTCTATTTATTTGGT  
ATTTCTAATAGTACGAATATGCTGGCCATGATACCACAAAATCAACTCTTCTCGGTTACAGCTACGCATATGCTTGCATTAGCCAATCTCGATT

CATCTTCCCTCCCACGAAAATCAAGGAACCGAACGACTTTTCGACAATCTTTCCAATCAAATTC AACCGTCTCTCATTACATATCCTAATCGTCC  
TGAAAAACGAACGATATCATCTTTTCTCTTTCCCTGATTCCTAACACAACAACTGC ACTTGTTCGACCTCCGGCTCCGAAAAATCTACAATAG  
CTGCTCTGCTCATTGGCTCTATCCACCAGATACTTCAAACACCTCCACCGTTGACATTCAATCGCGTCTCCATAAGTAACTGTACATCCCGT  
CTCTCCGGGCTTCTGTCTCACTCGTCCCACAAAATACCGATTCTATTTCCAGCTACCATTCTCCATAACATCATTTATGGGCTCCGAGAATCTTC  
TCCTTGTGCTAATCTTCCATCTGCTATTGTATCAGCCAAAGATGCTGGGATCCATGAGTTTATCACATCGCTTCCACAAGGTTATAATGCTATG

>Bcin05g07690 (MLST2), partial sequence [organism=Botrytis pseudocinerea, strain D11\_M\_E27]  
ACC ACTATCACCAAGTCCTTTTCTGCACTTTCCCTCATCAAAAACGAACGAGAACATCATCAATAAAATACTTTGCTGAAGTAATTGGGTTTTATT  
TTGGCCAGGATGCCTTCTCTCTACGACAGCAAGCCTTCGATGATATGTTGTGGGTAGTTCTTGGTTGGTTGGATACTGTCAAATTCATTGATTT  
ACATTCTGAATTGCACTATTCAAATGACTCTCAGCCAGAATGGTACGGACAACAATATAAACCTGCATTTGCACATCGAGCGGACTATTTTGG  
GAATTGGCGTCAACAAGGATGGGATACTACTCTCTGTGGTGGTGGGATGATATGGTCACCATACTTACTCCATAACAAGAACGCAATTACCAATG  
AACTCTATATCGCAGCTTCGATATCGATGTACCTCTATTTCCCTGGAGATGACAATCAATCCCCATTTATGCTTTCCAACCCCTTCATATCCACC  
TCGCGATCCGAAATATCTACAGGCAGCTGTTGATGCTTACAAATGGCTGAATGGTTCCAATATGACGGATTTACAAGGATTATATGTCGACGGA  
TATCATATCTCGAATCTTTCTGGCGGTGAAAAACCCATTGCGATTCTAGAAATGAGATGGTATATACTTACAATCAAGGTGTTTTGCTTACTG  
GACAACGTGGTTTTGTATGACGCAACC GCCGACGATCATACCTTGTGGATGGCCACAAACTCATCGCAATGTTATTAACGCCACAGGCTATGA  
TCTGAAACACGATGTTGTTATCTCACCGCCACCCAAAGATGGTTCCGCATTGGCAAAATGGTTTGGCCTGGGTAGGAATGGAATAC TGAAGAA  
GGATGCGATTCAAGTGCTTCGTGTTCTCAAAATGGACAAAATTTCAAAGGCATATTTCTTTATCACCTTGATTGCATTTCTGTAGTGATTTGCCAG  
GGGAGCCTATTG CAGGGACGAAAAGAAAGCCTGGAATCGACAGAGAGTGGCATTCTGACAAAATGCTCGCAGTATACAAAAT

>Bcin06g01710 (MLST3), partial sequence [organism=Botrytis pseudocinerea, strain D11\_M\_E27]  
GTGAGTCCGGCTTTTGTATCTGAGCGTTAAGATAGACACTGATATACCAAGGCAATCACCTAATTTTCATGGCTTTCTTCCCTGCATCATCTACC  
TACCCTGGAATGCTTGGAGAATTATACTCCGCAGCTTTACAGCTCCTGCTTTCAATTGGATCTGTTCCCTGCTGTGACAGAATTGGAGACGG  
TTGTAATGGATTGGCTGGCCAAGCTTCTCAATCTCCAGACTGTTATTTGTCTTCGACTCATGGTGGTGGTGTATCCAAGGATCAGCCTCGGA  
AGCTATCGTTACCGTTATGGTTGCTGCCCGGATAAAATATCTTCGTGAACTACTGAAGGTCTGTCAGGCATTGAACTCGAGGGTGC GATTGCA  
TATAAGAGGAGTAAGCTAGTTGCACTAGGAAGCGAAATGGCACACAGCTCCACGCAGAAAAGCAGCGCAGATAGCTGGCGTTAGATTCCGATCGA  
TTCCAGTACTCGCATCCAATGATTTCCGCATGACGGGTGATGATCTAGAGAAGGTATTGAAAGAATGCAAATCTCAAGGATTGGAACCCTTCTA  
TCTAACTTCGACTTTGGGAACAACATCTACATGTGCAGTTGATGACTTCGCATCTATCGCAACAGTACTTTTCGAAATATGCACCTCCAGATGTT  
GCAGGCGAGATATGGGTTACGTCGATGCTGCTTATGCAGGCGCAGCTTTGGTTTGGCCTGAATACCATCATCTAACATCGTCCTTCCAGCATT  
TTCATTCTTCGATATGAACATGCACAAAATGGCTTTTGACAAAATTTGACGCTTCTTGTCTATATGTCAAGAAAACGCAAAGATCTGATCGATGC  
ACTCTCTATAACACCAAGTTATCTTCCGCAACGAGTTTTTCAGAGAGTGGACTCGTGACCGACTATCGGGACTGGCAAATTCCTCTCGGAAGACGC  
TTCCGAAGCTTAAAGATTTGGTTTGTCTCAGAACCCTACG

>Bcin09g03030 (MLST4), partial sequence [organism=Botrytis pseudocinerea, strain D11\_M\_E27]  
ACCCTTCAATCCCACCGCAGCTCCTATACCGAAAAGCGAGCATCTACCAATTTCTCCTTCCACCTGCGACTTTAAGACCATTGGCTTTTTCGCACT  
TTCACAAAAAAGCATAGTTTAAACATTGACGTCGTCCGCAATACAAGTGTGGCTACTTTTTATTGGAAAGCATTGTGGGACAGGATGGAGGGAAG  
AAGGACTGGCAGAGAGAGTTTTAGAGGAGGTGCGCAAGAGTTGGAAGAATAGGAGTGGTGGTGTATTTGTCGAGGGCGAGGGAACGGAATTGAA  
GGAGATTCTGAAAAGCTTTGGAAGGGAATATGAGTGGTGGAAAGGATAGTCGTAGGAAGAGAGCTAAGCCGGCAGAACAGTTTAGTACTGGGATCA  
TCACAATATGGAGAGGTCAATCATAACAAGACTTGGGCTACGGCCAGGGAATATACCCAGAGAGGATAGTCAGTCAAGTTTGGGAATGTCAACGT  
TGGAGGTCAATGACGAGGAAGATGAGGATGGCCTGATGGATCCAAGGAGGTGGTTGAAAGTCATTGATGCATTTGAGCAACCCCGACTGGTGTA  
TAATGTTGCTAAGAAGCACTTTGATAGGTATGTTTCAATGATAAAAATTTTATCTGAATCAAAC TAACTCAGTACAGAGATACCTCCAAACCTTCA  
TTGTTCCACCTGCGTCTCATAAAAACACTCCTCTTCCAAAACCGCTATAATGTTATCCATCAACGTCTCCTTCCGCAATGAATCTTTTCAAACGC  
CCGCTTTTCAAAGGTGGCAAAGCTTCCCTTCAACGCAGCAGCTCCGCCATTACC ACTCAACAACAATCATACAAATTAACGCCGATAGCTAATCT  
TCTCGGTGCAATCGCAGCTCTCATATGCTTCTCGGCCCTCTCAGCATTTCACCCTGTTACCCTCGCCATCAATGACCTGACGGGCAGCATC  
GCTCTCGATCTTACACACGCAGCAGCCATTTC

>Bcin11g01310 (MLST5), partial sequence [organism=Botrytis pseudocinerea, strain D11\_M\_E27]  
ACTGACATGGACTTCATGTGGAACCGGCTACAATGCGCAACGCTTGAAGTTCCGCTCGAATATGGCGATGCAACGTCAACAGCGAAAGCCAGT  
ATTGCGCTTGCTCGTTATCTGCCACTGTTGCCGCGAGCAAGAAGCTCGGGTCTCTCTTGATAAAATCCCGGTGGACCCGGTGCCACTGGTGTG  
GCTTTGTGCAGTCTGGAGCCGGTGCCGCATCTCGACACTGAGTGGTGGATTATACGATATCATCGGATGGGATCCACGTGGAACCGGTGCTTC  
CGCTCCTATTTTGGAAATGTTTTCAAATGCCAGTGCAGGATATGATTTTAAACAACGCTTTCCATCTGCTCCCAATCTCTGGCTCGGACAATTT  
TCAAATGCCAGCGCAAATTTCTGCCGTTAGCTCTGCTATCACATCTTTTGCACACTTCTGTGCTGCTCTTGCAAAAAGCTTGTGTAGCTCAGAAGT  
CCCCCGCTCTTTACACCTCAACAGCAGCATATGTTGCTCGAGACATGGCAGCGATAGTCGATGCCCTGGATGGAACCTCTGCAAAACTCAACTA  
CTGGGGTTTCTCATATGGAATATTTTCTTGCCGAGTTTATCCAACTTTCCAGGCCGCGTGGGAAGAGTTCTTGCCGATGGGGTTTTTCGAC  
GCAAAGGCAAATGCACTCACATACGTTAGCCAATTTCCCAACGATCAACTCAGTGTTCGTGCTTCGTTGAACGATTTTGCAGCTTTCTGTACCA  
CCGCCGGTAGTAAAGGTTGCTCTTTTGCACCCGCCCTACTGGAACCACCGGTACC GTTGTACCAGACTGGACAACATAATGAAGGATATGTT  
CCTCAATCCCATTGTTGCTTCGGGCTTAAGCATCA

>Bcin15g03910 (MLST6), partial sequence [organism=Botrytis pseudocinerea, strain D11\_M\_E27]  
GCCAAAACACAAAATCATCCAACGATGAAGATGATACTCCACTGCCCTTAATTATCTGGCACGACTCGGCGATAATTACAAAAGCGGATGGTCT  
TGCGCAAGTTGGAAAGCTAGCTGAAGCTATTCATCCTGGGACTTTTGTCTATAATATTCATGTAGATGAGGATGCATCTGCAGATAGGACAGCT  
ACCTTCTTTGGAAAATCTCACTCGTGGGTACATCCCTAGTCTTCTTTTAAATGCCATGCTGACTCTCTTACCAAGTTCAAATCGAAAAGGTCTG  
CGAAGACCTCGCCTCCCATCCTATTCTCTCTACCGCGCTGCCGTGACGCAATCGGATTCTCCCAAGGCGCCAATTCTTGCAGCGTTACATA  
TCCCCTGCAATTCTCCACCATCCGCTCTCTCTGACCTTCGGTTCCCAACACAACGGCATTCTGCCTTCCAAGCCTGTGGTCTGCCGATT  
TCCTCTGTCTGGTGTCTCAAACCTTTTGGCATCCAACACCTGGTCAACCTTTGTCCAATCTCGTCTCGTACCCGCTCAATACTTCAGAGATCC  
GGAAAACCTAGACTCTTACCTTGAATATTCCAATTTCTTGGCGACATCAATAATGAGCGGCTTCTCAAGAACCACAAATATAAATCCAACATG  
GAAAAATTGGAACGATTTCGTAATGTATGTCTTTGAAGATGATACAACTGTATCCCTAAGGAAAGTGGATGGTGGGCTGAAGTCAACGGCACGG  
AAGTTACACCACTGAAAGAAAGAGCCATTTATAAGGAAGATTGGCTAGGTTTAAAGACATTGGATGAGGCCGAAAATTAGTTTTCGAAACCAT  
TCCAGGGGGACATATGACGTTAGGAGAGGAGATGCTAGAGAAGGCTTTCAAAGAGTACTTTGGCCCAGCAGGGAAGAAATTTGGG

>Bcin16g03460 (MLST7), partial sequence [organism=Botrytis pseudocinerea, strain D11\_M\_E27]  
ATGAACCTCTTAATTTGAACTCTTCATTAATCGCAAGTGATGAACCCCTATTTTTGCCAGAGGATAGTTACAAGACGTATATCATTAGTCGAGA  
ACCCTCATGATATATATTGACGGATTTTTGAAAAGCGAATGAAAAGTAAACATCTGGTTGATGTTAGGTATGTTACTTATTCTGATGAAATGAAC  
AAGAGAACTGATGAGATAGTGAACCGCTTTATGAACCGTCTACTGTTTCTCACGACAGGAAGTTACCATTGATACTTCAGTTCGAAATTCGG  
AAGTGGCGGTTTTAGAGAGGGATGAGGTGGTCAAGGTGATTTGAGCATAGAGCGAGGGCATTTCAGGGGTGGAGGATGAGATGGGGATTGAGAA  
GTTGAGGACCGAGAGGTATGGGGTTGGAGGACATTTAGGGATGCATTTGTAAGTTTTGGGGGATTGACGAAGGCTTTTGTCTATTTCCATCAG  
TACGGATCTTAAAAGAAAAGATAGCATGAACACGAGGGCTAACAACTAGGAAATAGCGATTGGAGCGGAGGTAACGTTGGCATAGACCGATTTAG  
TACTTTTCATGGTCTATGTGACGATCTTCTGATATCGAAGGTGGAGAACGGAATTTCCACGTATTTGTTGGGACCACAAGGAGGAAGGTGGGAG  
GAATTCCTGGAACTACGGAAGCATTTGGATCCAAGAAGTGGAAAAAATGTAACAGTAGAAGGGGTGACATTCAAACCAATCAAGGGAAATGCCG  
TATTCTGGGAAAAATACTGACAACAACGGGAGGGGATATGAT

>Bcin12g03020 (MLST8), partial sequence [organism=Botrytis pseudocinerea, strain D11\_M\_E27]  
CGATTGGCTGCGAAGAAAAGTGCAGCAGCCGAGTCAACAAAAGCACGAATAAACCGTCCGGCAAGAGAAAATTTCTCTGAACCACAACATGACA  
CGAGCGCGGAAGAGTATATTGGGCGAGAAGCTTCATCAAGAGCACCAAAGCGACAACGAGTCGATGATAAATTATAACTCTTACGGTGGAAAGAAA  
TGAAAATACAGCAGCTTATGCTTCCGAAAAGTTCATCTGGAAGTATAAATGTTGGTGGAGGTAGGAAGACCCTTTTCAAGAAGAACCCTCGA  
ACGGCATTGTGCTGGCAAGTTGCCCTTGAAGTATCAACATCGGTGGAAAGAAAGGCTACCCAAATCGAGGACGAAGGAAGAGCAGCTTATG  
CTTCCGGGAAAATTTGCCCCAGGAAGTATCAGCTCTGGCGCAAAAGAGGCCATTTTCATTTCCAAGATGAAACGAGACCGGCCATGTCTCTGGAAA  
GCTCCACATGGCAGTATCGATGGTATGCGAAAACCGGAAATGGCTGCCCTCCACCGCGAAATTTGCTGAGGGTGGGAGGAAACCAGGCCAGGTT  
GTCTCTTCTCTATTACATTCATCTACATCAAAGAAAAGTTCGATGAATCCGAAGAACAAGCGGAACCTGCAAAACCATCCAATGCGCCTT  
TGACAGAGGAAAATGGAGACATTCACCAATCTAGGATTTATCGAGAAGGCTTGACAGCCATCTATCGACTAACTCGATATGAAAGCCCCGACCGC  
CATTCAAAAAGCATCTGTGCAGCAGTTGGTATCGGACGATAGCGATGCTTTTCATACAAGCAGAGACTGGATCTGGAAAAACTTTGGCATATCTA  
CTACCTATAGTCGAGCGAATATTAGCATTGAGTGAGAATGGCGTACAAA

>Bcin02g07770 (MLST9), partial sequence [organism=Botrytis pseudocinerea, strain D11\_M\_E27]  
CAGCTTTCCCTTTTCGGTCTTGGCATCTACAGTCATTGCCATGCCCTACACCATCACAACTTGAGTCTCGGGCCGTTATCGATTCCGATGCCGTTG  
TAGGATTTGCCGAAGCTGTTCCAGTGGGACCGTAGGAACAGTTTATGAGGCATATAAACCATTCTTAAAGTCGTAAATGGATGCGTACCATT  
CCCTGCCGTCGATGCATCGGGTAACACAGGGTATGTCTTATACCTTTCTCTTCCCTCACGATTGCTATTTAGTCTCTAACATATTTTAGTGGTG  
GTTTGTACCAACTGGCAGTAGCAATGGTGGTTGACGACGAGTACCGGTCAAGTATATGTTTCGAGGAGGACAAAGCGGATCAAACCTACGCTAT  
CATGTACTCTGGTAAAGTTCTCTCTAAACTTCTCCTTATAGATCCAATATCTAACAGAATCTTAGGTACATGCCAAAGGACGAGCCCTCAACCG  
GTATTGGTCAACGTCAGATTGGGAAGGTGTAATCGTCTGGCTCTCCAGCGCCACCGCCACAACCTGCCGACAACATCTTAGCTGTTTGTCTCTC  
GGCCACGAGGCTGGGATTTGTTCCACCGATGGTTATTTCCCTTTCTGGTACCAGCCCTCTTATCAAGTACGAAAGTATCTGGCCCGTCGACCAT  
TCAATGGGTCTTACTAGTACTGTTGGTGGACAACAACCTATGATTGCTTGGGAGTCTTTACCTACTGCTGCTCAAACCTGCTCTTGAGAACACCG  
ATTTCCGGTCTGCGAATGTTCCATTTATTTCCAGCTGTTTTACAAAACAATCT

>Bcin04g02090 (MLST10), partial sequence [organism=Botrytis pseudocinerea, strain D11\_M\_E27]  
CGGAGGATGATATGGCAAAGTCTATGATTACCAAAGCATTTGTAGGCATGAGTAGTAAACTCTCAAATATGACTATGAATGATGTTTACAAGCC  
CTACATCCATGTAAGAAAATGTAGAATAGAGAGATCAATAACTGGAATAATATCGTTTGTAGGCTTTCAAGTTACTTACGCAGTTCAACCCAAT  
CACTACAGCTATTGCCGAATCCCCTATTTCAAATGGCTGTCTCAGCAAATACCATCGAAAAGTACACACTGCTAGGCCCTTTCTTTCAGAATA  
TCTCCTCTGCAACAGGAAGTTACCAGGGAATACTTCAGTGCACCAAAGACGATAGATAGGCGACACATTGCCACATCTCAAGATGCGTTACGAC  
TGACCTTACAAAACCATCAAAAAGATTTACTCGATATCATCAACCCTTTGTTTCGAGCAAGTCCAATCGCCAAAAGCAAAACCTTGGATTGGTT  
CGCTACATTGTGAATCAAAAATCAAGCGTCGAGCACTTCAGGTAGACCCGAAAGAGTATCTTCTGATGGCTTTATGCACAATGTCAGTGTCT  
GTTCTAGATGGTCTTTGTGAGCCATTCATGGATACCACATTTCTCGAAAATTTGGAAGATTGATATTGATTATCTAAGACGTGCGCCTCGTGTAG  
ATATCAAGGACGAGACCAAGTTGAACGCCGATGAGAAGGCTTCTGAGAAGTACTATGAGGACACGGTTCTGGCACCTTCCAATTTTCATCTCTGA  
GGTGTCTTTCTGACATTGGCTGCTCATCATTATGGTAGTGAAGCTTTAATGCCACGCACAAGAGTCTGGAGAAAGACATCAAATATATTTCAA  
AAGCAATTGACTGCCGTTGAAGCA

>Bcin01g07220 (MLST1), partial sequence [organism=Botrytis pseudocinerea, strain D11\_T\_B18]  
GATGGCATATCTTGTCTTTTCGCATTATGCTTTGGAACGTGCTGGACAAGCTTGGGTTAGTGCTCTGCGTGTAGAAGCACTAAAGAAGATTC  
TCGCACAACCGAAGTCATGGTTTGGAGGAATCCAGAAATTCACCTGGCCGGTTGAACGAAGTTTGGATAGGAACTCTGAGGAAATGCGTAATCT  
CGTTGGCCGCTTTGCTGGTATTGTATTACACAGCGTTTTTTATGCTATTGATATCAATCATTGGGCTTTCGTGAATACATGGAAACTGACATTA  
GTCTCGATGGCAACTGGGCCAGTTATATACGCTGTCACCAAAACGTTCAATCGCGTGAGTGGAAAATGGGAAACAAGTGAACCTACGCCCTCTGA  
AATGACCACTGGCATATTTTCAGAGACTTTCTCCAACATCAAAGTGGTTTCGGGCTTTTACTCTGGAACTTACTTTGGGACAAAACACACCAAA  
GCTACAGAAGAACTTTATAAAGTTGGACTAATACGAGCAAACCTACTCGGGATTGCTGTGGGGATTGACAGATGCGATGTCATCCTTCATCACTG  
CAACTATCTTTTATTATGCCACGGTCTCATTACCAAGAGAGAGATCAGTATCGCGACTGCACTACAGACTGTCAATCTTCTATTATTTGGTAT  
TTCTAATAGTACGAATATGCTGGCCATGATACCACAATCAACTCTTCTCGGTTACAGCTACGCATATGCTTGCATTAGCCAATCTCGATTCAT  
CTTCTCCACGAAAAATAAAGGAACCGAACGGCTTTTCGACAATCTTTCCAATCAAATTC AACCGTCTCTCATTACATATCCTACTCGTCCCGA  
AAAACGAACGATATCATCCTTTTCTCTTTCCCTGATTCCTAACTCAACAACTGCACCTGTGCGACCTCCGGCTCCGAAAAATCTACAATAGCT  
GCTCTGCTCATTGGTCTCTATCCGCCAGATACTTCAACACCTCCACCGTTGACATTCAATCGCGTCTCCATAAGTAACGTGCACATTCGGCCTC  
TCCGGGCTTCTCTCACTCGTTCACAAAATACCGATTCTATTTCCAGCTACCATACTCCATAACATCATTTATGGTCTCCAGAATCTTCTCC  
TTGTGCTAGTCTTCCATCAGCTATTGCATCAGCAAAAGATGCTGGGATCCATGAATTTATCACATCGCTTCCACAAGTTATGATACTAT

>Bcin05g07690 (MLST2), partial sequence [organism=Botrytis pseudocinerea, strain D11\_T\_B18]  
ACCCTATCACCAAGTCTTCTCTGCACTTTCCCTCATCAAAAAACGAACGAGAATCATCAATAAACTTTGCTGAAGTAATGGGTTTTATT  
TTGGCCAGGATGCCTTCTCTCTACGACAGCAAGCCTTCGATGATATGTTGTGGGTAGTTCTTGGCTGGCTGGATACTGTCAAATTCATTGATTT  
ACATTCTGAATTGCACTATTCAAACGACTCTCAGCCAGAATGGTACGGACAACAATATAAACCTGCATTTGCACATCGAGCGGACTATTTTGG  
GAATTGGCTTCAACAAGGATGGGATACTACTCTCTGTGGTGGTGGATGATATGGTCACCATACTTACTCCATAACAAGAAATGCAATTACCAATG  
AACTCTATATCGCAGCTTCGATATCGATGTACCTCTATTTCCCGGAGATGACAATCAATCCCCATTTATGCTTTCCAACCTTCATATCCACC  
TCACGATCCGAAATATCTACAGGCAGCTGTTGATGCTTACAAATGGCTGAATGGTTCCAACATGACGGATTTACAAGGATTATATGTCGACGGG  
TATCATATCTCGAATCTTTCTGGCGGTGAAAACACCCATTGCGATTCTAGAAATGAGATGGTATATACCTACAATCAAGGTGTTTTGCTTACTG  
GACAACGTGGTTTTGTATGACGCAACCGCCGACGATCATACCTTGTGGATGGCCACAACTCATCGCGAATGTTATTAATGCCACAGGCTATGA  
CCTGAAACACAATGTTGCCATCTCACCGCCACCCAAAAGATGGTTCCGCATTTGGCAAAGTGGTTTGGCCTGGGTAGGAATGGAATACCTGGAAGAA  
GGATGCGATTCAAGTGCTTCGTGTTCTCAAAATGGACAACTTTCAAAGGCATATTTCTTACCACCTTGATTGCGTTCGTAGTGATTTGCCAG  
GGGAGCCTATTGCAGGGACGAAGGAAGGCCTAGAACTCGACAGAGTGTGGCATTCTGACAAATGCTCACAGTATACAAAAT

>Bcin06g01710 (MLST3), partial sequence [organism=Botrytis pseudocinerea, strain D11\_T\_B18]  
GGTGAGTCTGACTTTTGTATTTGAGCGTTAAGATGGACACTGATGTACCAAGGCAATCACCTAATTTTCATGGCGTTCTTCCCTGCATCATCTAC  
CTACCCTGGAATGCTGGGAGAATTATACTCAGCAGCTTTCACAGCTCCTGCTTTCAATTTGGATCTGTTCCCTGCTGTGACAGAATTTGGAGACG  
GTTGTAATGGATTGGTTGGCCAAGCTTCTCAATCTCCAGACTGTTATTTGTCGTCGACTCATGGTGGTGGTGTATCCAAGGATCAGCCTCGG  
AAGCTATCGTTACCCTTATGTTGCTGCCCAGATAAGTATCTTCGTGAAACCACTGAAGTCTGTGCGGAATTGAACCTCGAGGATGCGATTGC  
ATATAAGAGGAGTAAGCTAGTTGCACTAGGAAGCGAAAATGGCACACAGCTCCACGCAGAAAGCAGCGCAGATAGCTGGCGTTAGATTTCCGATCG  
ATTCCAGTACTCGCATCCAATGATTTTCGCCATGACGGGTGATGATTTAGAGAAGGTATTTGAAAGAAATGCAAATCTCAAGGATTTGGAACCTTCT  
ATCTAACTTCGACGTTGGGAACAACATCTACATGCGCAGTTGACGACTTCGCATCTATTTGCAACAGTACTTTCAAATATGCACCTCCAGATGT  
TGCAGGCGAGATCTGGTTTACGTCGATGCTGCTTATGCAGGTGCAGCTTTGGTTTTGCCCTGAATACCATCATCTAACATCGTCTTCCAGCAT  
TTCCATTCCTTTGATATGAACATGCACAAAATGGCTTCTGACAAAATTTGACGCTTCTTGCCTATATGTCAAGAAACGCAAAGATCTGATCGATG  
CACTCTCCATAACACCAAGTTATCTTCGCAACGAGTTTTTCAGAGAGTGGACTCGTAACCGACTATCGGGACTGGCAAATTCCTCTCGGAAGACG  
TTTCCGAAGCTTAAAGATTTGGTTTTGTCTCAGAACCCTAC

>Bcin09g03030 (MLST4), partial sequence [organism=Botrytis pseudocinerea, strain D11\_T\_B18]  
ACCCTTCAACCCACCGCAGCTCCTATACCAAAAGCGAGTATCCTACCAATTTCTCCTTCCACCTGCGACTTTAAGACCATTGGCTTTTTCGCACT  
TTCACAAAAAGCATAGTTTAACATTGACGTCGTCGGCATTACAAGTGTGGCTACTTTTTATTGGAAAGCATTGTGGGACAGGATGGAGGGAGGA  
AGGACTGGCAGAGAGAGTCTTGGAGGAGGTGCGCAAGAGTTGGAAGAAATAGGAGTGGCGGTGTCATTGTGCGAGGGCGAGGAAACGGAATTTGAAG  
GAGATTCTGAAAAGCTTTGGATGGGAATATGAGTGGTGGAAAGGATAGTCATAGGAAGAGAGCTAAGCCGGCAGAATAGTTTAGTACTGGGATCAT  
CACAATATGGAGAGGTCATATACAAAGACTTTGGGCTACGGCCAGGGAATATACCCAGAGAGGATAGTCAAGTTTGGGAATGTCAACGTT  
GGAGGTCATGACGAGGAAGATGAGGATGGCTGATGGATCCAAGAAGTGGTTAAAAGTCTGTTGATGCATTGAGCAACCTCGACTGGTGTAC  
AATGTTGCTAAAAAGCACTTTGATAGGTATGTTTCAATGATAAAAATTTTATCTGAATCGACTAACTCAGTACAGAGATACCTCCAAACCTTCAT  
TGTTCCACCTGCGTCTCATAAAAACACTCTCTTCCAAAACCGCTATAATGTTATCCATCAACGCTCTCTTCCGCAATGAATCTTTTCAAACGCC  
CGCTTTCAAAGGTGGCAAATCTTCCCTTCAACGCAGCACGTCGGCCATTACCACCCAACAACAATCATACAAAATTAACGCCGATATCTAATCTT  
CTCGGTGCAATCGCAGCTCTCATATGCTTCTCGGTCTCTCAGTATTTACCCACTGGTACCCTCGCCATCAATGACCTGACGGGCAGTATCG  
CTCTTGATCTTACACACGCAGCAGCCATTC

>Bcin11g01310 (MLST5), partial sequence [organism=Botrytis pseudocinerea, strain D11\_T\_B18]  
ACTGACATGGACCTCATGTGGAACCGCGTAGAATGCGCAACGCTTGAAGTTCCGCTCGAATATGGCGATGCAACGTCAACGGCAAAGCCAGT

GTTGCGCTTGCTCGTTATCTGCCACTTTTGCCGCGAGCAAGAAGCTCGGGTCTCTCTTGATAAAATCCCGGTGGACCCGGTGCCTCTGGTGTTC  
GCTTTGTGCAGTCTGGAGCTGGTGCCGCGTCTCGACACTGAGTGGTGGATTATACGATATCATCGGATGGGATCCACGTGGAACCGGTGCTTC  
GGCTCCTATTTTGGAAATGTTTTGCAAATGCCAGTGGGAGTATGATTTTAAACAACGCGTTCCATCTGCTCCGAATCTCTGGCTCGGACAATTTG  
CGAATGCCAGCGCAAATTTCTGCTGTAGCTCTGCTATCACATCCTTTGACACTTCTGTGCGTGTCTTTGCAAAGCTTGCCTGGCTCAGAAATC  
TCCCCTCTTTTACACCTCAACAGCAGCATATGTTGCTCGAGACATGGCAGCGATAGTCGATGCATTGGATGGGACCTCTGCAAAACCTTAACTAC  
TGGGGTTTTCTCATATGGAACATCTTCTAGCTGAGTTTATCCAACTTTCCAGGCCGCGTGGGAAGAGTTCTTGCCGATGGTGTTCGACG  
CAAAGGCAAATGCACTCACATACGTTAGCCAACTTTCCAAACGATCAACTCAGTGTTCGTGCTTCGTTGAACGATTTTGCAGCTTCTGCACCAC  
CGCCGGTAGTAAAGTTGCTCTTTTGCCACCGCCCTACTGGAACCTCAGGTACTGTTGCTACCAGACTGGACAACATAATGAAGGATATGTTT  
CTCAATCCTATTGTTGCTTCGGGCTTGAGCATCA

>Bcin15g03910 (MLST6), partial sequence [organism=Botrytis pseudocinerea, strain D11\_T\_B18]  
GCCAAAACACAAAATCATCCAACGATGAAGATGATACTCCACTTCCCTTGATTATCTGGCATGGACTCGGCGATAATTACAAAGCGGATGGTCT  
TGCGCAAGTTGAAAACTAGCTGAAGCTATTCATCTGGGACTTTTGTCTATAAATATTCATGTAGATGAGGATGCATCTGCAGATAGGACAGCT  
ACCTTCTTTGGAAATCTCACTCGTGAAGTACATCCCTATTTTCTTTAAATACCATACTAACTCTCTTACCAAGTTCAAATCGAAAAGGTCTG  
CGAAGACCTCGCCTCCCATCCTATTCTCTCTACCAGCCCGCCGCTCGACGCAATTGGATTCTCCCAAGGCGGCCAATTCTTGCGCGGTTACATA  
CCCCGCTGCAATGCTCCACCCATCCGCTCTCTCTGACCTTCGGTTCCCAACACAACGGCATTTCTGCCTTCCAATCCTGTGGTCCGCGATT  
TCCTCTGTGCGGGTGTCAAACCTTTTGCATCCAACACCTGGTCAACCTTTGTCCAATCTCGTCTCGTACCCGCTCAATACTTCAGAGATCC  
GGAAAACCTAGACTCTTACCTTGAATATTTCAATTTCTTGGCGACATCAATAATGAGCGGTTCTCAAGAACCAAACATATAAATCCAACATG  
GAAAAATTGGAACGATTTCGTAATGTATGCTTTGAAAGACGATACAACCTGTCAATCCCTAAGGAAAGTGGATGGTGGGCTGAAGTCAACGGCACGG  
AAGTTACACCACTGAAAGAAAGAGCCATTTATAAAGAAGATTGGCTAGGGTTAAAGACGTTGGATGAGGCCGAAAAATTAGTTTTCGAAACCAT  
TCCAGGGGGACATATGACGTTAGGAGAGGAGATACTAGAGAAGGCTTTCGAAGAGTACTTTGGTCCAGCAGGGAAGAAATTTGGG

>Bcin16g03460 (MLST7), partial sequence [organism=Botrytis pseudocinerea, strain D11\_T\_B18]  
ATGAACCTCTAATTTGAACTCTTCATTAATTGCAAGTGATGAGCCCTATTCTGCCAGAGGATAGTTACAAGACGTATATCATTAGTTCGAGA  
ACCACCTCATGATATACATTTGACGGATTTTGTAAAAGCGAATGAAAAGTAAACACTTGGTTGATGTTAGGTGTGTTATTTATTTCTGATGAAATGAAC  
AAGAGAGACTGATGAGATAGTGAACCGCTTTATGAACCGTCTACTGTTTCTCACGGACAGGAAGTTACCATTGATCCTTCGGTTCGAAATTTCTG  
AAGTGGCGGTTTTAGAGAGGGATGAGGTGGTCAGGTGTATTGAGCATAGAGCGAGGGCATTTTCAGGGTGGAGGGACGAGATGGGGATTGAGAA  
GCTGAGGACGAGAGGTATGGGGTTGGAGGACATTTATGGGATGCATTTGTAAGTTTTGGGGATTGACGAAGGCCCTGTCTATTTTCTATCAG  
TACGGATCTTGAAGAAAAGATAGCATGAACACGAGGGCTAATAACTAGGAAAATAGCGATTGGAGCGGAGGTAACGTTGGCATAGACCGATTTAG  
TACTTTTCATGGTCTATGTGACGATCTCTCTGATATCGAAGGTGGAGGAACGGAATTTCCACGTTATGTTGGGACCAAAAGGAGGAAGGTGGGAG  
GACTTCTTGAAACTACGGAAGCATTGGATCCAAGAACTGGAGAAAATGTAACAGTAGAAGGGGTGACATTTCAAACCAATCAAGGAAATGCCG  
TATTCTGGGAAAATACTGACAACAACGGGAGGGGCTATGAT

>Bcin12g03020 (MLST8), partial sequence [organism=Botrytis pseudocinerea, strain D11\_T\_B18]  
CGATTGGCTGCGAAGAAAAGTGCAGCACCAGTCAACAAAAGCAGATAAACCATCGGCAAGGGAAATATTCTCTGAACCACAACATGACAC  
GAGCGCGGAAGAGTATATCGGGCGAGAAGCTTTCATCAAGAGCACCAAAAGCAGAACGAGTGCATGATAAATTATAACTCTTACGGTGGAAAGAAAT  
GAGAATACAGCAGCTTATGCTTCCGGGAAAAGTCCATCTGGAAGTATAAATGTTGGTGGAGGTAGGAAGACCCTTTTCAAGAAGAACCCTCGAA  
CGGCATTTGTGCTGGCAAGTTGCCCTGGAAGTATCAACATTTGGTGGAAAGAAGGCTACCCAAATCGAGGACGAGGGTAGAGCAGCTTATGCT  
TCCGAAAATTTGCCCCAGGAAGTATAAATCTTGGCGCAAAGAAGGCGATTTCAATCCAAGATGAAACGAGACCGGCTTATGCTCTGGAAGC  
TTCCACATGGTAGTATCGACGGTATGCGAAAACCGTGAATGGCTGCCGTCCACCGCGAAAATGCTGAGGGTGGGAGGAAACCAGGCCAGGTTGT  
CTCTTCTCTATTTCACATTTCAATCCTACTTCAAAGAAAAGTTCGATGAACCGAAGAACAAGCGGAACCGGCAAAACCATCCAATGCACCTTTGA  
CAGAGGAAATGGCGACTTTCACCAATCTAGGGTTATCGAGAAGGCTTGCAGCCATCTATCGACTAAACTCGATATGAAAGCCCCGACCGCCAT  
TCAAAGCATCTGTGCAGCAGTTGGTATCGGACGATAGCGATGCTTCCATACAAGCAGAGACTGGATCTGGAAAAACTTTGGCATATCTACTA  
CCTATAGTCGAGCGAATATTAGCATTTGAGTGAGAATGGCGTACAAA

>Bcin02g07770 (MLST9), partial sequence [organism=Botrytis pseudocinerea, strain D11\_T\_B18]  
CAGCTTTCCCTTTCCGGTCTTGGCATCTACAGTCAATGCCATCCCTACACCATCACAACCTTGAGTCTCGGGCCGTTATCGATTCCGATGCCGTTG  
TAGGATTTGCCGAAACTGTTCCAGTGGGACCGTAGGAACAGTTTACGAGGCATATAAACCATTCCTTAAAGTCGTAAATGGATGCGTACCATT  
CCCTGCCGTCGATGCATCGGGTAACACAGGGTATGTCTTATAACCATTTCTTCCACACGATTGCTATTGAGTCTCTAACATATTTTAGTGGTG  
GTTTGTCAACAACTGGCAGTAGCAATGGTGGTTGCAGCAGCAGTACCGGTCAAGTATATGTTTCGAGGAGGACAAAGCGGATCAAACCTACGCCAT  
CATGTAATCCTGGTAAAGTTCTCTCTAAAAGTCTTCTTATAGATCCAACCTAAACAAAATCTTAGGTACATGCCAAAGGACGAGCCCTCAACCGGT  
ATTGGTCAACGTCACGATTGGGAAGGTGTAATTTGCTGGCTCTCAAGCGCCACCGCCACAACCTGCCGACAACATCTTAGCCGTTTGTCTTCCG  
CCCACGGAGGCTGGGATTGTTCCACCGATGGCTATTCCCTTTCTGGTACCAGCCCTTATCAAGTACGAAAGTATCTGGCCCGTCGATCATTC  
AATGGGTCTTACTAGTACTGTTGGTGGAAAACAACCTGTGATGCTTGGGAGTCTTTACCAACTGCTGCTCAAACCTGCTCTTGAGAACACCGAT  
TTCGGTGTGCGAATGTTCCATTCAATCCGGCTGTTTTCACAGATAATCT

>Bcin04g02090 (MLST10), partial sequence [organism=Botrytis pseudocinerea, strain D11\_T\_B18]



CGGAGGATGATATGGCAAAGTCTATGATTACCAAAGCATTGTAGGCATGAGTAGTAACTGTGCAATATGACTATGAATGATGTTTACAAGCC  
CTACATCCATGTAAGAAATGTAGAATAGAGAGATCAGTAACTGGAACATAATATCGTTTGTAGGCTTCAAGTTACTTACGCAGTTCAACCCAAT  
CACTACAGCTATTGCCGAATCCCCTACTATTTCAAATGGCTGTCTCAGCAAATACCATCGAAAAGTACACACTGCTAGGCCCTTTCTTCAAGAATA  
TCTCCTCTGCAACAGGAAGTTACCAGGGAATACTTCAGTGCGCCAAAAGACGATAGATAGACGACACATTGCCACATCTCAAGATGCGTTACGAT  
TAACCTTACAAACCCATCAAAAAGATTTACTTGTATATCATCAACCCTTTGTTCGAGCAAGTCCAATCGAAAAAGCAAAACCCCTGGATTGGTT  
CGCTACATTGTGAATCAAAAATCAAAAACGTCGAGCACTTCAGGTAGACCCGAAAAGAAAGTGTCTTCTGATGGCTTTATGCACAATGTCACCTGTC  
GTTCTAGATGGTCTTTGTGAGCCATTTCATGGATACCACATTTCTCGAAAATTTGGAAGATTGATATTGATTATCTAAGACGTGCGCCTCGTGTAG  
ATATCAAGGACGAGACCAAGTTGAACGCTGATGAGAAGGCTTCTGAGAAGTATTATGAGGACACTGTTCTGCGCACTTCTAATTTTCATCTCTGA  
GGTCTTCTTTCTGACATTGGCTGCTCATCATTTATGGTAGTGAAGCTCTTAATGCCACGCATAAGAGTCTGGAGAAAGACATCAAAATATATTCAA  
AAGCAATTGACTGCCGTTGAAGCA

>Bcin01g07220 (MLST1), partial sequence [organism=Botrytis pseudocinerea, strain D11\_T\_E01]  
GATGGCATACTTGTCTTTTTCGCATTATGCTTTGGAACGTGCTGGACAAGCTTGGGTTAGTGTCTGCGTGTAGAAGCACTAAAGAAGATTC  
TTGCACAACCGAAGTCATGGTTTGGAGGAATCCAGGAATTCACCTGGCCGATTGAACGAAGTTTTGGATAGGAACCTGAGGAAATGCGTAATCT  
CGTTGGCCGCTTTGTTGGTATTGTATTACAGCATTTTTTATGTTATTGATATCAATCATTTGGGCTTTCGTGAATACGTGGAAGCTGACATTA  
GTCTCAATGGCAACTGGCCAGTTATATACGCTGTCACCAAAACGTTCAATCGCGTGAGTGGAAAATGGGAAAACAAGTGAACCTACGCATCTG  
AAATGACCACTAGCATATTTTTCAGAGACGTTCTCCGACATCAAAGTGGTTTCGGGCTTTTACTCTGGAACTTACTTTGCGACAAAACACACCAA  
AGCTACAGAAGAACTTTATAAGGTTGGACTAATACGAGCAAACCTACTCGGGATTGCTGTGGGGATTGACAGATGCGATGTCATTTCTCATCACT  
GCAACTATCTTTTATTATGCCACGGTTCTCATTACCAAGAGAGAGATCAGTATCGCGACTGCACTACAGACTGTCAATCTTCTATTATTTGGTA  
TTTCTAATAGTACGAATATGCTGGCCATGATACCACAAATCAACTCTTCTCGGTTACAGCTACGCATATGCTTGCATTAGCCAATCTCGATTC  
ATCTTCTCCACGAAAATCAAGGAACCGAACGACTTTTCGACAATCTTTCCAATCAAATTCACCGTCTCTCATTCACATATCCTAATCGTCCCT  
GAAAAACGAACGATATCATCCTTTTCTCTTTCCCTGATTTCTAACAACAACACTGCACTTGTCCGACCCCTCCGGCTCCGGAAAATCTACAATAG  
CTGCTCTGCTCATTGGCCCTTATCCACCAGATACTTCAACACCTCCACCGTTGACATTCAATCGCGTCTCCATAAGTAACCTGTCACATCCCCTC  
TCTCCGGCTTCTGTCTCACTCGTCCACAAAATACCGATTCTATTTCCAGCTACCATTCTCCTTAACATCATTTATGGGCTCCAGAATCTTCTC  
CTTGTGCTAATCTTCCATCTGCTATTGTACCAGCCAAAAGATGCTGGATCCATGAGTTTATCACATCGCTTCCACAAGGTTATAATGCAAT

>Bcin05g07690 (MLST2), partial sequence [organism=Botrytis pseudocinerea, strain D11\_T\_E01]  
ACCACTATACCAAGTCTTTTCTGCACTTTCTCATCAAAAACGAACGAGAACATCATCAATAAAACTTTTGTGCTGAAGTAATGGGTTTTATT  
TTGGCCAGGATGCCTTCTCTCTACGACAGCAAGCCTTCGATGATATGTTGTGGGTAGTTCTTGGTTGGTTGGATACTGTCAAATTCATTGATTT  
ACATTCTGAATTGCACTATTCAAATGACTCTCAGCCAGAATGGTACGGACAACAATATAAACCTGCATTTGCACATCGAGCGGACTATTTTGG  
GAATTGGCGTCACAAGGATGGGATACTACTCTCTGTGGTGGTGGGATGATATGGTACCATACCTTACTCCATACAAGAACGCAATTACCAATG  
AACTCTATATCGCAGCTTCGATATCGATGTACCTCTATTTCCCTGGAGATGACAATCAATCCCCATTTATGCTTTTCCAACCCCTTCATATCCACC  
TCGCGATCCGAAAATATCTACAGGCAGCTGTTGATGCTTACAAATGGCTGAATGGTTCCAATATGACGGATTTACAAGGATTATATGTCGACGGA  
TATCATATCTCGAATCTTTCTGCGGTGAAAACACCCATTCGATTTCTAGAAATGAGATGGTATATACCTACAATCAAGGTGTTTTGCTTACTG  
GACAACGTGGTTTGTATGACGCAACCGCCGACGATCATACCTTGTGGATGGCCACAAACTCATCGCAATGTTATTAACGCCACAGGCTATGA  
TCTGAAACACGATGTTGTTATCTCACCGCCACCCAAAAGATGGTTCCGCATTGGCAAAAATGGTTTTGGCTGGGTAGGAATGGAATACTGGAAGAA  
GGATGCGATTCAAGTGCTTTCGTGTTCTCAAATGGACAAAATTTCAAAGGCATATTTCTTTTCATCACTTGATTGCATTTCTGTAGTGATTTGCCAG  
GGGAGCCTATTGCAGGACGAAAAGAAAGCCTGGAACCTCGACAGAGAGTGGCATTCTGACAAAATGCTCGCAGTATACAAAAT

>Bcin06g01710 (MLST3), partial sequence [organism=Botrytis pseudocinerea, strain D11\_T\_E01]  
GTGAGTCCGGCTTTTGTATCTGAGCGTTAAGATAGACACTGATATACCAAGGCAATCACCTAATTTTCATGGCTTTCTTCCCTGCATCATCTACC  
TACCCTGGAATGCTTGAGAATTATACTCCGAGCTTTTACAGCTCCTGCTTTCAATTGGATCTGTTCCCTGCTGTGACAGAATTGGAGACGG  
TTGTAATGGATTGGCTGGCAAGCTTCTCAATCTCCAGACTGTTATTTGTCTTCGACTCATGGTGGTGGTGTATCCAAGGATCAGCCTCGGA  
AGCTATCGTTACCGTTATGGTTGCTGCCCGGATAAAATATCTTCGTGAAACTACTGAAGGCTGTCTCAGGCATTGAACTCGAGGGTGCATTTGCA  
TATAAGAGGAGTAAGCTAGTTGCACTAGGAAGCGAAATGGCACACAGCTCCACGCAGAAAGCAGCGCAGATAGCTGGCGTTAGATTCCGATCGA  
TTCCAGTACTCGCATCCAATGATTTCCGCATGACGGGTGATGATCTAGAGAAGGTAATTGAAAGAATGCAAATCTCAAGGATTGGAACCCCTCTA  
TCTAACTTCGACTTTGGGAACAACATCTACATGTGCAGTTGATGACTTCGCATCTATCGCAACAGTACTTTTCGAAAATATGCACCTCCAGATGTT  
GCAGGCGAGATATGGGTTACGTCGATGCTGCTTATGCAGGCCAGCTTTGGTTTGCCCTGAATACCATCATCTAACATCGTCTTCCAGCATT  
TTCATTTCTTCGATATGAACATGCACAAATGGCTTTTGACAAAATTTGACAGCTTCTTGTCTATATGTCAAGAAACGCAAAGATCTGATCGATGC  
ACTCTCTATAACACCAAGTTATCTTCGCAACGAGTTTTTCAGAGAGTGGACTCGTGACCGACTATCGGGACTGGCAAATTCCTCTCGGAAGACGC  
TTCCGAAGCTTAAAGATTTGGTTTTGTCTCAGAACCCTAC

>Bcin09g03030 (MLST4), partial sequence [organism=Botrytis pseudocinerea, strain D11\_T\_E01]  
ACCCTTCAATCCACCGCAGCTCCTATACCGAAAAGCGAGCATCCTACCAATTTCTCCTTCCACCTGCGACTTTAAGACCATCGGCTTTTTCGCACTT  
TCACAAAAAAGCATAGTTTAAACATTGACGTCGTCCGCATTACAAGTGTGGCTACTTTTATTGGAAAGCATTGTGGGACAGGATGGAGGGAAGA  
AGGACTGCAGAAAAGAGTTTTAAAGGAGGTCGCCAAGAGTTGGAAGAATAGGAGTGGTGGTGTATTATGTCGAGGGCGAGGGAACGGAATTGAAGG  
AGATTCTGAAAGCTTTGGAAGGGAATATGAGTGGTGAAGGATAGTCTGAGGAAGAGAGCTAAGCCGGCAGAACAGTTTAGTACTGGGATCATC

```
ACAATATGGAGAGGTCATACATACAAGACTTGGGCTACGGCCAGGGAATATACCCAGAGAGGATAGTCAAGTTTGGGAATGTCAACGTTG
GAGGTCAATGACGAGGAAGATGAGGATGGCCTGATGGATCCAAGGAGGTGGTTGAAAGTCATTGATGCATTTGAGCAACCCCGACTGGTGTATA
ATGTTGCTAAGAAGCACTTTGATAGGTTATGTTTCAATGATAAAATTTTATCTGAATCAAACCTAACCTCAGTACAGAGATACCTCCAAACCTTCA
TTGTTCCACCTGCGTCTCATAAAAACTCCTCTTCCAAAAACCCTATAATGTTATCCATCAACGTCTCCTTCGCAATGAATCTTTTCAAACGCC
CGCTTTTCAAAGGTGGCAAAGCTTCCCTTCAACGCAGCAGTCCGCCATTACCCTCAACAACAATCATACAAATTAACGCCGATAGCTAATCTT
CTCGGTGCAATCGCAGCTCTCATATGCTTCTCGGCTCCTCAGCATTTACCCACTGGTACCCTCGCCATCAATGACCTGACGGGCAGCATCG
CTCTCGATCTTACACACGCAGCAGCCATTC
```

```
>Bcin11g01310 (MLST5), partial sequence [organism=Botrytis pseudocinerea, strain D11_T_E01]
ACTGACATGGACTTCATGTGGAACCGGCTACAATGCGCAACGCTTGAAGTTCCGCTCGAATATGGCGATGCAACGTCAACAGCGAAAGCCAGT
ATTGCGCTTGCTCGTTATCTTGCCACTGTTGCCGCGAGCAAGAAGCTCGGGTCTCTCTTGTAAATCCCGGTGGACCCGGTGGCACTGGTGTGG
CTTTGTGCAGTCTGGAGCCGGTGGCCCATCTCGACACTGAGTGGTGGATTATACGATATCATCGGATGGGATCCACGTGGAACCGGTGCTTCC
GCTCCTATTTTGAATGTTTTCAAATGCCAGTGCAGGATGATGATTTTAAACAACGCTCTCCATCTGCTCCCAATCTCTGGCTCGGACAATTTT
CAAATGCCAGCGCAAATTTCTGCCGTTAGCTCTGCTATCACATCTTTTGACACTTCTGTGCTGCTCTTGCAAAAAGCTTGTGTAGCTCAGAAGTC
CCCCGCTCTTTACACCTCAACAGCAGCATATGTTGCTCGAGACATGGCAGCGATAGTCGATGCCCTTGGGTGGAACCTCTGCAAAACTCAACTAC
TGGGGTTTCTCATATGAACTATTTTCCCTTGGCGAGTTTATCCAACTTTCCAGGCCGCTGGGAAGAGTTCTTGGCGATGGGGTTTTTCGACG
CAAAGGCAAATGCACTCACATACGTTAGCCAACCTTCCCAACGATCAACTCAGTGTTCGTGCTTCGTTGAACGATTTTGCAGCTTTCTGTACCAC
CGCCGGTAGTAAAGGTTGCTCTTTTGCCACCGCCCTACTGGAACCACCGGTACCGTTGCTACCAGACTGGACAACATAATGAAGGATATGTTT
CTCAATCCCATTTGTTGCTTCCGGCTTAAGCATCA
```

```
>Bcin15g03910 (MLST6), partial sequence [organism=Botrytis pseudocinerea, strain D11_T_E01]
GCCAAAAACACAAAATCATCCAACGATGAAGATGATACTCCACTGCCCTTAATTTATCTGGCACGGACTCGGCGATAAATTACAAAGCGGATGGTCT
TGCGCAAGTTGGAAAGCTAGCTGAAGCTATTCATCTGGGACTTTTGTCTATAAATTTTCATGTAGATGAGGATGCATCTGCAGATAGGACAGCT
ACCTTCTTTGAAAATCTCACTCGTGGGTACATCCCTAGTCTTCTTTTAAATGCCATGCTGACTCTCTTACCAAGTTCAAATCGAAAAGGCTCG
CGAAGACCTCGCCTCCCATCCTATTTCTCTTACCAGCCTGCCGTCGACGCAATCGGATTTCTCCAAGGCGGCCAATTTCTTGCAGCGGTTACATA
TCCCCTGCAATTTCTCCACCCATCCGCTCTCTCTGACCTTCCGTTCCCAACACAACGGCATTTCTGCTTCCAAGCCTGTGGTCTGCCGATT
TCCTCTGTGCTGGTGTCAAACCTCTTTTGGCATCCAACACCTGGTCAACCTTTGTCCAATCTCGTCTCGTACCCTCAATACTTCCAGAGATCC
GGAAAACCTAGACTCTTACCTTGAATATTTCAAATTTCTTGGCGACATCAATAATGAGCGGTTCTCAAGAACCACAAACATAAATCCAACATG
GAAAAATTTGGAACGATTCGTAATGTATGCTTTGAAAGATGATACAACTGTCAATCCCTAAGGAAAGTGGATGGTGGGCTGAAGTCAACGGCACGG
AAGTTACACCCTGAAAGAAAGAGCCATTTATAAGGAAGATTTGGCTAGGTTTAAAGACATTTGGATGAGGCCGAAAATTTAGTTTTTCGAAACCAT
TCCAGGGGGACATATGACGTTAGGAGAGGAGATGCTAGAGAAGGCTTTCAAAGAGTACTTTGGCCAGCAGGGAAGAAATTTGGGG
```

```
>Bcin16g03460 (MLST7), partial sequence [organism=Botrytis pseudocinerea, strain D11_T_E01]
CATGAACCTCTTAATTTGAACTCTTCATTAATCGCAAGTGATGAACCTATTTTGGCCAGAGGATAGTTACAAGACGTATATCATTAGTCGAGA
ACCCTCATGATATATATTGACGGATTTTGTAAAGCGAATGAAAGTAAACATCTGGTTGATGTTAGGTATGTTACTTATTTCTGATGAAATGAAC
AAGAGAAAATGATGAGATAGTGAACCGCTTTATGAACCGTCTACTGTTTCTCACGGACAGGAAGTTACCATTGATACTTCCAGTTCCGAAATTCGG
AAGTGGCGGTTTTTAGAGAGGGATGAGGTGGTCAAGGTGATTTGAGCATAGAGCGAGGGCATTTTCAGGGGTGGAGGGATGAGATGGGGATTGAGAA
GTTGAGGACGCAGAGGTATGGGGTTGGAGGACATTTATGGGATGCATTTGTAAGTTTTGGGGGATTGACGAAGGCTTTTGTCTATTTCCCTATCAG
TACGGATCTTAAAAGAAAAGATAGCATGAACACGAGGGCTAACAACTAGGAAAATAGCGATTTGGAGCGGAGGTAACGTGGCATAGACCGATTTAG
TACTTTTCATGGTCTATGTGACGATCTTCTGATATCGAAGGTGGAGGAAACGGAAATTTCCACGATTTGTGGGACCACAAGGAGGAAGGTGGGAG
GAATTCCTGGAAAATACGGAAGCATTGGATCCAAGAATCGGAAAAAATGTACAGTAGAAGGGGTGACATTCAAACCAATCAAGGGAATGCCGT
ATTCTGGGAAAATACTGACAACAACGGAGGGGATATGAT
```

```
>Bcin12g03020 (MLST8), partial sequence [organism=Botrytis pseudocinerea, strain D11_T_E01]
TCGATTGGCTGCGAAGAAAATGCGCAGCACCGAGTACCCAAAAGCACGAATAAACCGTTCGCAAGAGAAAATTTCTCTGAACCACAACATGAC
ACGAGCGCGGAAGAGTATATTGGGCGAGAAGCTTCATCAAGAGCACCAAAGCGACAACGAGTCGATGATAAATTATAACTCTTACGGTGGAAAGAA
ATGAAAATACAGCAGCTTATGCTTCCGGAAAATTTCCATCTGGAAAGTATAAATGTTGGTGGAGGTAGGAAGACCACTTTTTCAAGAAGAACCCTCG
AACGGCATTTGTGCTGGCAAGTTGCCCCCTGGAAGTATCAACATCGGTGGAAAGAAGGCTACCCAAATCGAGGACGAAGGAAGAGCAGCTTAT
GCTTCCGGGAAAATTTGCCCCAGGAAGTATCAGCTCTGGCGCAAAGAAGGCCATTTTCATTTCCAAGATGAAACGAGACCGGCCATGCTCTTGAA
AGCTCCACATGGCAGTATCGATGGTATGCGAAAACCGGAAAATGGCTGCCGTCCACCGCGAAAATTTGCTGAGGGTGGGAGGAAACCAGGCCAGGT
TGTCTCTTCTCTATTTACATTTCAATCCTACATCAAAGAAAATTTTCGATGAATCCGAAAGAACAAGCGGAACCTGCAAAAACCATCCAATGCGCCT
TTGACAGAGGAAAATGGAGACATTCACCAATCTAGGATTTATCGAGAAGGCTTGCAGCCATCTATCGACTAAACTCGATATGAAAGCCCCGACCG
CCATTCAAAAGCATCTGTGACGAGTTGGTATCGGACGATAGCGATGCTTTTATACAAGCAGAGACTGGATCTGAAAAAATTTGGCATATCT
ACTACCTATAGTCGAGCGAATATTAGCATTTGAGTGAGAATGGCGTACAAA
```

```
>Bcin02g07770 (MLST9), partial sequence [organism=Botrytis pseudocinerea, strain D11_T_E01]
CAGCTTTCCTTTCCGTTTGGCATCTACAGTCATTGCCATGCCATACCCATCACAACCTTGAGTCTCGGGCCGTTATCGATTCCGATGCCGTTG
```

TAGGATTTGCCGAAGCTGTTCCAGTGGGACCGTAGGAACAGTTTATGAGGCATATAAACCATTCCTTAAAGTCGTAAATGGATGCGTACCATT  
CCCTGCCGTCGATGCATCGGGTAACACAGGGTATGTCTTATACCTTTCTCTTCCTCACGATTGCTATTGAGTCTCTAACATATTTTAGTGGTG  
GTTTGTACCAACTGGCAGTAGCAATGGTGGTTGCAGCAGCAGTACCGGTCAAGTATATGTTTCGAGGAGGACAAAGCGGATCAAACACGCTAT  
CATGTACTCTGGTAAAGTTCTCTCTAAACTTCTCCTTATAGATCCAATATCTAACAGAATCTTAGGTACATGCCAAAGGACGAGCCCTCAACCG  
GTATTGGTCAACCGTACAGATTGGGAAGGTGTAATCGTCTGGCTCTCCAGCGCCACCGCCACAACCTGCCGACAACATCTTAGCTGTTTGTCTTC  
GGCCACGAGGCTGGGATTGTCCACCGATGGTTATTCCCTTTCTGGTACCAGCCCTCTTATCAAGTACGAAAGTATCTGGCCCGTCGACCAT  
TCAATGGGTCTTACTAGTACTGTTGGTGGACAACAACCTATGATTGCTTGGGAGTCTTTACCTACTGCTGCTCAAACCTGCTCTTGAGAACACCG  
ATTTCCGGTGTGCGAATGTTCCATTTATTCCAGCTGTTTTCCACAACAATCT

>Bcin04g02090 (MLST10), partial sequence [organism=Botrytis pseudocinerea, strain D11\_T\_E01]  
GCGGAGGATGATATGGCAAAGTCTATGATTACCAAAGCATTTGTAGGCATGAGTAGTAAACTCTCAAATATGACTATGAATGATGTTTACAAGC  
CCTACATCCATGTAAGAAATGTAGAATAGAGAGATCAATAACTGGAACATAATATCGTTTGTAGGCTTTCAAGTTACTTACGCAGTTCAACCCAA  
TCACTACAGCTATTGCCGAATCCCCTACTATTTCAAATGGCTGTCTCAGCAAATACCATCGAAAAGTACACGCTGCTAGGCCCTTTCTTCAGAAT  
ATCTCTCTGCAACAGGAAGTTACCAGGGAATACTTCAGTGCACCAAAGACGATAGATAGGCGACACATTGCCACATCTCAAGATGCGTTACGA  
CTGACCTTACAAAACCCATCAAAAAGATTTACTCGATATCATCAACCCTTTGTTTCGAGCAAGTCCAATCGCCAAAAGCAAACCTTGGATTGGT  
TCGCCTACATTGTGAATCAAAATCACAAGCGTCGAGCACTTCAGGTAGACCCGAAAGAAGTATCTTCTGATGGCTTTATGCACAATGTCACGT  
CGTTCTAGATGGTCTTTGTGAGCCATTCATGGATACCACACTCCCGAAAATTTGGAAGATTGATATTGATTATCTAAGACGTGCGCCTCGTGTA  
GATATCAAGGACGAGACCAAGTTGAACGCCGATGAGAAGGCTTCTGAGAAGTACTATGAGGACACGGTTCCTGGCACTTCCAATTTTCATCTCTG  
AGGTGTTCTTTCTGACATTGGCTGCTCATCATTTATGGTAGTGAAGCTCTTAATGCCACGCACAAGAGTCTGGAGGAAGACATCAAATATATTTCA  
AAAGCAATTGACTGCCGT  
TGAAGCA

>Bcin01g07220 (MLST1), partial sequence [organism=Botrytis pseudocinerea, strain D12\_E\_cal10]  
ATGGCATATCTTGTCTTTTTCGATTATGCTTTGGAACGTGCTGGACAAGCTTGGGTTAGTGCTCTGCGTGTAGAAGCACTAAAGAAGATTCT  
TGACAACCGAAGTCATGGTGTGAGGAATCCAGGAATTCACCTGGCCGATTGAACGAAGTTTTGGATAGGAACCTCGAGGAAATGCGTAATCTC  
GTTGGCCGCTTTGTTGGTATTGTATTACAGCATTFTTTTATGTTATTGATATCAATCATTTGGGCTTTTCGTGAATACGTGGAAGCTGACATTAG  
TCTCAATGGCAACTGGCCAGTTATATACGCTGTCAACAAAACGTTCAATCGCGTGAGTGGAAAATGGGAAAACAAGTGCAACTACGCATCTGA  
AATGACCACTAGCATATTTTCAGAGACGTTCTCCAACATCAAAGTGGTTTCGGGCTTTTACTCTGGAACTTACTTTGCGACAAAACACACCCAAA  
GCTACAGAAGAACTTTATAAAGTTGGACTAATACGAGCAAACTACTCGGGATTGCTGTGGGGATTGACAGATGCGATGTCATCTTTCATCACTG  
CAACTATCTTTTATTATGCCACGGTCTCATTACCAAGAGAGAGATCAGTATCACGACTGCCTACAGACTGTCAATCTTCTATTATTTGGTAT  
TTCTAATAGTACGAATATGCTGGCCATGATACCACAAATCAACTCTCTCGGTTACAGCTACGCATATGCTTGCATTAGCCAATCTCGATTTCAT  
CTTCTCCACGAAAATCAAGGAACCGAACGACTTTCGACAATCTTTCCAATCAAATTC AACCGTCTCTCATTCACATATCCTAATCGTCTCTGA  
AAAACGAACGATATCATCCTTTTCTCTTTCCCTGATTCCCTAACACAACAACCTGCACTTGTCCGACCCCTCCGGCTCCGGAAAATCTACAATAGCT  
GCTCTGCTCATTGGCCCTATACCACAGATACTTCAACACCTCCACCGTTGACATTCAATCGCGTCTCCATAAGTAACTGTCACATCCCGTCTC  
TCCGGGCTTCTGTCTCACTCGTCCACAAAATACCGATTCTATTTCCAGCTACCATTCTCCATAACATCATTTATGGGCTCCAGAATCTTCTCC  
TTGTGCTAATCTTCCATCTGCTATTGTATCAGCCAAAAGATGCTGGGATCCATGAGTTTATCACATCGCTTCCACAAGGTTATAATGCTAT

>Bcin05g07690 (MLST2), partial sequence [organism=Botrytis pseudocinerea, strain D12\_E\_cal10]  
TCACCACTATACCAAGTCTTTTCTGCACTTTCTCATCAAAAACGAACGAGAATCATCAATAAATACTTTGCTGAAGTAATGGGTTTTTA  
TTTTGGCCAGGATGCCTTCTCTTACGACAGCAAGCCTTCGATGATATGTTGTGGGTAGTTCTTGGTTGGTTGGTACTGTCAAATTCATTGAT  
TTACATTCTGAATTGCACTATTCAAATGACTCTCAGCCAGAATGGTACGGACAACAATATAAACCTGCATTTGCACATCGAGTGCAGCTATTTT  
GGGAATTGGCGTCACAAGGATGGGATACTACTCTCTGTGGTGGTGGATGATATGGTACCATACTTACTCCATAACAAGAACGCAATTACCAA  
TGAACTCTATATCGCAGCTTCGATATCGATGTACCTCTATTTCCCTGGAGATGACAATCAATCCCCATTTATGCTTTCCAACCCCTTCATATCCA  
CCTCGCGATCCGAAAATATCTACAGGCAGCTGTTGATGCTTACAAATGGCTGAATGGTTCCAATATGACGGATTTACAAGGATTATATGTCGACG  
GATATCATATCTCGAATCTTTCTGGCGGTGAAAACACCCATTCGATTTCTAGAAATGAGATGGTATATACCCACAATCAAGGTGTTTTGCTTAC  
TGGACAACGTGGTTTGTATGACGCAACCGCCGACGATCATACCTTGTGGATGGCCACAACTCATCGGAATGTTATTAACGCCACAGGCTAT  
GATCTGAAACACGATGTTGTTATCTCACCGCCACCCAAAAGATGGTTCCGATTTGGCAAAAATGGTTTGGCTGGGTAGGAATGGAATACTGGAAG  
AAGGATGCGATTCAAGTGCTTCGTGTTCTCAAAAATGGACAAACTTTCAAAGGCATATCTTTTCATCACTTGAATTGCATTTCTGTAGTGATTGCC  
AGGGGAGCCTATTGCAGGGACGAAAAGAAAGCCTGGAACCTGACAGAGAGTGGCAATCTGACAAAATGCTCGCAGTATACAAAATG

>Bcin06g01710 (MLST3), partial sequence [organism=Botrytis pseudocinerea, strain D12\_E\_cal10]  
GTGAGTCCGGCTTTTGTATCTGAGCGTTAAGATAGACACTGATATACCAAGGCAATCACCTAATTTTCATGGCTTTCTTCCCTGCATCATCTACC  
TACCCTGGAATGCTTGGAGAATTATACTCCGCAGCTTTACAGCTCCTGCTTTCAATTGGATCTGTTCCCTGCTGTGACAGAATTGGAGACGG  
TTGTAATGGATTGGCTGGCCAAGCTTCTCAATCTCCAGACTGTTATTTGCTTTCGACTCATGGTGGTGGTGTATCCAAGGATCAGCCTCGGA  
AGCTATCGTTACCGTTATGGTTGCTGCCCGGATAAAATATCTTCGTGAAAATCTGAAAGTCTGTGAGGATGAGTGGGCTGAGGATGCAATGCA  
TATAAGAGGAGTAAGCTAGTTGCACTAGGAAGCGAAAATGGCACACAGTCCACGCAGAAAGCAGCGCAGATAGCTGGCGTTAGATTCCGATCGA  
TTCCAGTACTCGCATCCAATGATTTCCCATGACGGGTGATGATCTAGAGAAGGTAATTGAAAGAATGCAAATCTCAAGGATTGGAACCCCTTCTA

TCTAACTTCGACTTTGGGAACAACATCTACATGTGCAGTTGATGACTTCGCATCTATCGCAACAGTACTTTTCGAAATATGCACCTCCAGATGTT  
GCAGGCGAGATATGGGTTACGTCGATGCTGCTTATGCAGGCGCAGCTTTGGTTTGGCCCTGAATACCATCATCTAACATCGTCCTTCCAGCATT  
TTCATTCCCTTCGATATGAACATGCACAAATGGCTTTTGACAAATTTTCGACGCTTCTTGTCATATATGTCAAGAAACGCAAAGATCTGATCGATGC  
ACTCTCTATAACACCAAGTTATCTTCGCAACGAGTTTTCAGAGAGTGGACTCGTGACCAGTATCGGGACTGGCAAATTCCTCTCGGAAGACGC  
TTCCGAAGCTTAAAGATTTGGTTTGTCTCAGAACCCTAC

>Bcin09g03030 (MLST4), partial sequence [organism=Botrytis pseudocinerea, strain D12\_E\_cal10]  
ACCCTTCAATCCCACCGCAGCTCCTATACC GAAAGCGAGCATCTACCAATTCTCCTTCCACCTGCGACTTTAAGACCATTGGCTTTTTCGCACT  
TTCACAAAAAGCATAGTTTAAACATTGACGTCGTCCGCATTACAAGTGTGGCTACTTTTATTGGAAAGCATTGTGGGACAGGATGGAGGGAAGA  
AGGACTGGCAGAGAGAGTTTTAGAGGAGGTCGCCAAGAGTTGGAAGAAATAGGAGTGGTGGTGTATTGTGCGAGGGCGAGGGAACGGAATTGAAG  
GAGATTCTGAAAAGCTTTGGAAGGGAATATGAGTGGTGGAAAGGATAGTCGTAGGAAGAGAGCTAAGCCGGCAGAACAGTTTAGTACTGGGATCAT  
CACAATATGGAGAGGTCAATCATAACAAGACTTGGGCTACGGCCAGGGAATATACCCAGAGAGGATAGTCAGTCAAGTTTGGGAATGTCAACGTT  
GGAGGTCAATGACGAGGAAGATGAGGATGGCTGATGGATCCAAGGAGTGGTTGAAAGTCATTGATGCATTTGAGCAACCCCGACTGGTGTAT  
AATGTTGCTAAGAAGCACTTTGATAGGTATGTTTCAATGATAAAATTTTATCTGAATCAACTAACTCAGTACAGAGATACCTCCAAACCTTCAT  
TGTTCCACCTGCGTCTCATAAAAACACTCCTCTTCCAAAACCGCTATAATGTTATCCATCAACGTCTCCTTCGCAATGAATCTTTTCAAACGCC  
CGCTTTTCAAGGTGGCAAAGCTTCTTCAACGCAGCACGTCCGCCATTACCACTCAACAACAATCATACAAATTAACGCCGATAGCTAATCTTC  
TCGGTCGCAATCGCAGCTCTCATATGCTTCTCGGCTCCTCAGCATTTACCCACTGGTACCCTCGCCATCAATGACCTGACGGGCAGCATCGC  
TCTCGATCTTACACACGCAGCAGCCATTCC

>Bcin11g01310 (MLST5), partial sequence [organism=Botrytis pseudocinerea, strain D12\_E\_cal10]  
ACTGACATGGACTTCATGTGGAACCGGCTACAATGCGCAACGCTTGAAGTTCGCTCGAATATGGCGATGCAACGTCAACAGCGAAAGCCAGT  
ATTGCGCTTGCTCGTTATCCTGCCACTGTTGCCGCGAGCAAGAAGCTCGGGTCTCTCTTGATAAAATCCCGGTGGACCCGGTGCCACTGGTGTG  
GCTTTGTGCAGTCTGGAGCCGGTGCCGCCATCTCGACACTGAGTGGTGGATTATACGATATCATCGGATGGGATCCACGTGGAACCGGTGCTTC  
CGCTCCTATTTTGAATGTTTTCAAATGCCAGTGGGAGTATGATTTTAAACAACGCTTTCCATCTGCTCCCAATCTCTGGCTCGGACAATTT  
TCAAATGCCAGCGCAAATTTGCGGTTAGCTCTGCTATCACATCTTTTGACACTTCTGTGCTGCTCTTGCAAAAAGCTTGTGTAGCTCAGAAGT  
CCCCCGCTCTTTACACCTCAACAGCAGCATATGTTGCTCGAGACATGGCAGCGATAGTCGATGCCCTGGATGGAACCTCTGCAAACTCAACTA  
CTGGGGTTTCTCATATGGAACATTTTTCTTGGCGAGTTTATCCAACTTTCCAGGCCGCTGGGAAGAGTCTTGGCCGATGGGGTTTTTCGAC  
GCAAAGGCAAATGCACTCACATACGTTAGCCAACCTCCCAACGATCAACTCAGTGTTCGTGCTTCGTTGAACGATTTTGCAGCTTTCTGTACCA  
CCGCCGGTAGTAAAGGTTGCTCTTTTGGCACCGCCCTACTGGAACCACCGGTACCGTTGCTACCAGACTGGACAACATAATGAAGGATATGTT  
CCTCAATCCCATTGTTGCTTCGGGCTTAAAGCATCA

>Bcin15g03910 (MLST6), partial sequence [organism=Botrytis pseudocinerea, strain D12\_E\_cal10]  
GCCAAAAACACAAAATCATCCAACGATGAAGATGATACTCCACTGCCCTTAATTAATCTGGCACGGACTCGGCGATAAATTACAAAGCGGATGGTCT  
TGCGCAAGTTGGAAGCTAGCTGAAGCTATTCATCCTGGGACTTTTGTCTATAAATATTCATGTAGATGAGGATGCATCTGCAGATAGGACAGCT  
ACCTTCTTTGAAAATCTCACTCGTGGGTACATCCCTAGTCTTCTTTTAAATGCCATGCTGACTCTCTTACCAAGTTCAAATCGAAAAGGTCTG  
CGAAGACCTCGCCTCCATCCTATTTCTCTTACC GCGCCTGCCGTCGACGCGATCGGATTTCTCCCAAGGCGGCCAATTTCTTGC GCGGTACATA  
TCCCCTGCAATTTCTCCACCCATCCGCTCTCTCTGACCTTCGGTTCCCAACACAACGGCATTTCTGCTTCCAAAGCCTGTGGTCTTCCGATT  
TCCTCTGTGCTGGTCTCAAACCTTTTTCGATCCAACACCTGGTCAACCTTTGTCCAATCTCGTCTCGTACCCGCTCAATACTTCAGAGATCC  
GGAAAACCTAGACTCTTACCTTGAATATTTCAAATTTCTTGGCGACATCAATAATGAGCGGTTCTCAAGAACCAAACATAATAAATCCAACATG  
GAAAATTTGGAACGATTCGTAATGTATGTCTTTGAAAGATGATACAACTGTCAATCCCTAAGGAAAGTGGATGGTGGGCTGAAGTCAACGGCAGGGA  
AGTTACACCCTGAAAAGAAAGAGCCATTTATAAGGAAGATTTGGCTAGGTTTAAAGACATTTGGATGAGGCGGAAAATTTAGTTTTCGAAACCATT  
CCAGGGGACATATGACGTTAGGAGAGGAGATGCTAGAGAAGGCTTCAAAGAGTACTTTGGCCAGCAGGGAAGAAATTTGGG

>Bcin16g03460 (MLST7), partial sequence [organism=Botrytis pseudocinerea, strain D12\_E\_cal10]  
ATGAACCTCTTAATTTGAACTCTTCATTAATCGCAAGTGTGAACCCCTATTTTGGCCAGAGGATAGTTACAAGACGTATATCATTAGTCGAGA  
ACCCTCATGATATATATTGACGGATTTTGGAAAGCGAATGAAAGTAAACATCTGGTTGATGTTAGGTATGTTACTTATTTCTGATGAAATGAAC  
AAGAGAAAATGATGAGATAGTGAACCGCTTTATGAACCGTCTACTGTTTCTCACGGACAGGAAGTTACCATTGATACTTCAGTTTCGAAATTCGG  
AAGTGGCGGTTTTAGAGAGGGATGAGGTGGTCAAGGTGATTTGAGCATAAGAGCGAGGGCATTTTCAGGGTGGAGGGATGAGATGGGGATTGAGAG  
GTTGAGGACGCAGAGGTATGGGTTGGAGGACATTTATGGGATGCATTTGTAAGTTTTGGGGGATTGACGAAGGCTTTTGTCTATTTCCATACAG  
TACGGATCTTAAAAGAAAAGATAGCATGAACACGAGGGCTAACAACTAGGAAAATAGCGATTGGAGCGGAGGTAAGCGTGGCATAGACCGATTTAG  
TACTTTTCATGGTCTATGTGACGATCTTCTGATATCGAAGGTGGAGGAACGGAAATTTCCACGTATTTGTGGGACCACAAGGAGGAAGGTGGGAG  
GAATTCCTGGAAACTACGGAAGCATTGGATCCAAGAACTGGAAAAAATGTAACAGTAGAAGGGGTGACATTCAAACCAATCAAGGGAATGCCG  
TATTCTGGGAAAATACTGACAACAACGGGAGGGGATATGAT

>Bcin12g03020 (MLST8), partial sequence [organism=Botrytis pseudocinerea, strain D12\_E\_cal10]  
CGATTGGCTGCGAAGAAAACCTGCGCAGCACCGAGTACCCAAAAGCACGAATAAACCTCGGCAGAGAAAATTTCTCTGAACCACAACATGACAC  
GAGCGCGAAGAGTATATTGGGCGAGAAGCTTCATCAAGAGCACCAAAGCGACAACGAGTGCATGATAATTATAACTCTTACGGTGGAAAGAAAT

GAAAATACAGCAGCTTATGCTTCCGGAAAACTTCCATCTGGAAGTATAAATGTTGGTGGAGGTAGGAAGACCCTTTTCAAGAAGAACCCTCGAA  
CGGCATTTGTCGCTGGCAAGTTGCCCCCTGGAAGTATCAACATCGGTGAAAAGAAGGCTACCCAAATCGAGGACGAAGGAAGAGCAGCTTATGC  
TTCCGGGAAATTTGCCCCCAGGAAGTATCAGCTCTGGCGCAAAGAAGGCCATTTTCATTCCAAGATGAAACGAGACCGGCCATATGTCTCTGGAAAG  
CTCCACATGGCAGTATCGATGGTATGCGAAAACCGCGAAAATGGCTGCCGTCCACCGCGAAAATGCTGAGGGTGGGAGGAAAACCAGGCCAGGTTG  
TCTCTTCTCTATTACATTCACATTCACATCAAAGAAAACTTTTCGATGAATCCGAAGAACAAGCGAACCTGCAAAAACCATCCAATGCGCCTTT  
GACAGAGGAAATGGAGACATTCACCAATCTAGGATTATCGAGAAGGCTTGCAGCCCATCTATCGACTAAACTCGATATGAAAGCCCCGACCGCC  
ATTCAAAAAGCATCTGTGCAGCAGTTGGTATCGGACGATAGCGATGCTTTTCATACAAGCAGAGACTGGATCTGGAAAAACTTTGGCATATCTAC  
TACCTATAGTCGAGCGAATATTAGCATTAAGTGAGAATGGCGTACAAA

>Bcin02g07770 (MLST9), partial sequence [organism=Botrytis pseudocinerea, strain D12\_E\_cal10]  
CAGCTTTTCCCTTTTCGGTCTTGGCATCTACAGTCATTGCCATGCCATACACCATCACAACCTTGAGTCTCGGGCCGTTATCGATTCCGATGCCGTTG  
TAGGATTTGCCGAAGCTGTTCCAGTGGGACCGTAGGAACAGTTTATGAGGCATATAAACCATTTCCCTTAAAGTCGTAAATGGATGCGTACCATT  
CCCTGCCGTCGATGCATCGGGTAACACAGGGTATGTCTTATACTTTCTCTTCCCTCAGATTGCTATTGAGTCTCTAACATATTTTAGTGGTG  
GTTTGTACCAACTGGCAGTAGCAATGGTGGTTGCAGCAGCAGTACCGGCCAAGTATATGTTTCGAGGAGGACAAAGCGGATCAAACCTACGCTAT  
CATGTACTCTGGTAAAGTTCTCTCTAAAATTTCTCTTATAGATCCAATATCTAACAGAATCTTAGGTACATGCCAAAGGACGAGCCCTCAACCG  
GTATTGGTCACCGTCACGATTGGGAAGGTGTAATCGTCTGGCTCTCCAGCGCCACCGCCACAACCTGCCGACAACATCTTAGCTGTTTGTCTTC  
GGCCACGAGGCTGGGATTGTTCACCGATGGTTATTCCTTTCTGGTACCAGCCCTTTATCAAGTACGAAAGTATCTGGCCCGTCGACCAT  
TCAATGGGTCTTACTAGTACTGTTGGTGGACAACAACCTATGATTGCTTGGGAGTCTTTACCTACTGCTGCTCAAACCTGCTCTTGAGAACACCG  
ATTTTCGGTCTGCGAATGTTCCATTTTATTCAGCTGTTTTTCACAAAACAATCT

>Bcin04g02090 (MLST10), partial sequence [organism=Botrytis pseudocinerea, strain  
D12\_E\_cal10]  
CGGAGGATGATATGGCAAAGTCTATGATTACCAAAGCATTTGTAGGCATGAGTAGTAACTCTCAAATATGACTATGAATGATGTTTACAAGCC  
CTACATCCATGTAAGAAATGTAGAATAGAGAGATCAATAACTGGAACATAATATCGTTTGTAGGCTTTCAAGTTACTTACGCAGTTCAACCCAAT  
CACTACAGCTATTGCCGAATCCCCTACTATTTCAAATGGCTGTCTCAGCAAATACCATCGAAAAGTACACACTACTAGGCCCTTTCTTTCAGAATA  
TCTCCTCTGCAACAGGAAGTTACCAGGGAATACTTCAGTGCACCAAAGACGATAGATAGGCGACACATTTGCCACATCTCAAGATGCGTTACGAC  
TGACCTCACAACCCATCAAAAAGATTTACTCGATATCATCAACCCTTTGTTTCGAGCAAGTCCAATCGCCAAAAGCAAAAACCTTGGATTGGTT  
CGCTACATTTGTGAATCAAAAATCACAAGCGTCGAGCACTTCAGGTAGACCCGAAAGAAGTATCTTCTGATGGCTTTATGCACAATGTCACCTGTC  
GTTCTAGATGGTCTTTGTGAGCCATTCATGGATACCACATTTCTCGAAAATTTTCGAAGATTGATATTGATTATCTAAGACGTGCGCCTCGTGTAG  
ATATCAAGGACGAGACCAAGTTGAACCGCGATGAGAAGGCTTCTGAGAAGTACTATGAGGACACGGTTCCTGGCACCTCCAATTTTCATCTCTGA  
GGTGTCTTTCTGACATTGGCTGCTCATCATTTATGGTAGTGAAGCTCTTAATGCCACGCACAAGAGTCTGGAGAAAGACATCAAATATATTCAA  
AAGCAATTGACTGCCGTTGAAGCA

>Bcin01g07220 (MLST1), partial sequence [organism=Botrytis pseudocinerea, strain D12\_KL\_cal2]  
ATGGCATATCTTGTCTTTTTCGCATTATGCTTTTGGAACTGCTGGACAAGCTGGTTAGTGTCTGCGTGTAGAAGCACTAAAGAAGATTCTTG  
CACAACCGAAGTCATGGTTTGGAGAAATCCAGGAATTCACCTGGCCGATTGAACGAAGTTTGGATAGGAACCTGAGGAAATGCGTAATCTCGT  
TGGCCGCTTTGTTGGTATTGTATTACAGCATTTTTTATGTTATTGATATCAATCATTTGGGCTTTTCGTGAATACGTGGAAGCTGACATTAGTC  
TCAATGGCAAATGGCCAGTTATATACGCTGTCAACAAAACGTTCAATCGCGTGGTGGAAAATGGGAAAACAAGTGAACCTACGCATCTGAAAT  
GACCACTAGCATATTTTTCAGAGACGTTCTCCAACATCAAAGTGGTTTCGGGCTTTTACTCTGAAAACCTTACTTTGCGACAAAACACACCAAAGCA  
CAGAAGAACTTTATAAAGTTGGACTAATACGAGCAAACCTACTCGGGATTGCTGTGGGATTGACAGATGCGATGTCATTTCTCATCACCTGCAACTA  
TCTTTTATTATGCCACGGTTCTCATTTACCAAGAGAGAGATCAGTATCGCGACTGCACTACAGACTGTCAATCTTCTATTTATTTGGTATTTCTAA  
TAGTACGAATATGCTGGCCATGATACCACAAAATCAACTCTTCTCGCGTTACAGCTACGCATATGCTTGCATTAGCCAATCTCGATTATCTTCC  
TCCCACGAAAATCAAGGAACCGAACGACTTTTCGACAATCTTTCCAATCAAATTCACCCTCTCTCATTTACATATCTTAATCGTCTGAAAAAC  
GAACGATATCATCTTTTCTCTTTCCCTGATTCTTAACACAACAACCTGCATTTGTCGGACCCCTCCGGCTCCGAAAATCTACAATAGCTGCTCT  
GCTCATTTGGCCTCTATCCACCAGATACTTCAACACCTCCACCCTGACATTCATCGCGTCTCCATAAGTAACTGTACATCCGTCTCTCCGGC  
TTCTGTCTCACTCGTCCACAAAATACCGATTCTATTTCCAGCTACCATTCTCCATAACATCATTTATGGGCTCCAGAATCTTCCCTTGTGCTAA  
TCTTCCATCTGCTATTGTATCAGCCAAAGATGCTGGATCCATGAGTTTATCACATCGCTTCCACAAGGTTATAATGCTAT

>Bcin05g07690 (MLST2), partial sequence [organism=Botrytis pseudocinerea, strain D12\_KL\_cal2]  
TCACCCTATCACCAGTCTTTTCTGCACTTTCTCATCAAACGAACGAGAACATCATCAATAAATACTTTGCTGAAGTAATTGGGTTTTTA  
TTTTGGCCAGGATGCCTTCTCTCTACGACAGCAAGCCTTCGATGATATGTTGTGGGTAGTTCTTGGTTGGTTGGATACTGTCAAATTCATTGAT  
TTACATTTCTGAATTTGCACTATTCAAATGACTCTCAGCCAGAAATGGTACGGACAACAATATAAACCTGCATTTGCACATCGAGCGGACTATTTT  
GGGAATTTGGCGTCAACAAGGATGGGATACTACTCTCTGTGGTGGTGGGATGATATGGTACCATACTTACTCCATAACAAGAACGCAATTACCAA  
TGAACCTATATCGCAGCTTCGATATCGATGTACCTCTATTTCCCTGGAGATGACAATCAATCCCATTTATGCTTTCCAACCTTTCATATCCA  
CCTCGCGATCCGAAAATATCTACAGGACGCTGTTGATGCTTACAAATGGCTGAATGGTTCCAATATGACGGATTTACAAGGATTATATGTCGACG  
GATATCATATCTCGAATCTTTCTGGCGGTGAAAAACCCCATTTGCGATTTAGAAAATGAGATGGTATATACCTACAATCAAGGTGTTTTGCTTAC  
TGGACAACGTGGTTTGTATGACGCAACCGCCGACGATCATACCTTGTGGATGGCCACAACCTCATCGCGAATGTTATTAACGCCACAGGCTAT  
GATCTGAAACACGATGTTGTATCTCACCGCCACCCAAAGATGGTTCCGATTTGGCAAATGGTTTGGCTGGGTAGGAATGGAATACTGGAAG

AAGGATGCGATTCAAGTGCTTCGTGTTCTCAAAATGGACAACTTTCAAAGGCATATTCTTTCATCATTGATTGCATTCTGTAGTGATTTGCC  
AGGGGAGCCTATTGCAGGGACGAAAGAAAGCCTGGAACTCGACAGAGAGTGGCATTCTGACAAATGCTCGCAGTATACAAAAAT

>Bcin06g01710 (MLST3), partial sequence [organism=Botrytis pseudocinerea, strain D12\_KL\_cal2]  
GGTGAGTCCGGCTTTTGTATCTGAGCGTTAAGATAGACACTGATATACCAAGGCAATCACCTAATTCATGGCTTTCTTCCCTGCATCATCTAC  
CTACCCCTGGAATGCTTGGAGAATTATACTCCGCAGCTTTCACAGCTCCTGCTTTCAATTGGATCTGTTCCCCTGCTGTGACAGAATTGGAGACG  
GTTGTAATGGATTGGCTGGCCAAGCTTCTCAATCTCCCAGACTGTTATTTGTCTTCGACTCATGGTGGTGGTGTATCCAAGGATCAGCCTCGG  
AAGCTATCGTTACCCTTATGGTTGCTGCCCCGATAAAATATCTTCGTGAAACTACTGAAGGTCTGTCAGGCATTGAACTCGAGGATGCGATTGC  
ATATAAGAGGAGTAAGCTAGTTGCACTAGGAAGCGAAATGGCACACAGCTCCACGCAGAAAGCAGCGCAGATAGCTGGCGTTAGATTCCGATCG  
ATTCCAGTACTCGCATCCAATGATTTCCGCATGACGGGTGATGATCTAGAGAAGGTATTGAAAGAAATGCAAATCTCAAGGATTGGAACCCCTTCT  
ATCTAACTTCGACTTTGGGAACAACATCTACATGTGCAGTTGATGACTTCGCATCTATCGCAACAGTACTTTGCAAATATGCACCTCCAGATGT  
TGCAGGCGAGATATGGGTTACGTCGATGCTGCTTATGCAGGCGCAGCTTTGGTTTGCCTGAATACCATCATCTAACATCGTCTTCCAGCAT  
TTTCATTCTTCGATATGAACATGCACAAATGGCTTTTGCACAAATTCGACGCTTCTTGTCTATATGTCAAGAAACGCAAAGATCTGATCGATG  
CACTCTCTATAACACCAAGTTATCTTCGCAACGAGTTTTCAGAGAGTGGACTCGTGACCGACTATCGGGACTGGCAAATTCCTCTCGGAAGACG  
CTTCCGAAGCTTAAAGATTTGGTTTGTCTCAGAACCCTAC

>Bcin09g03030 (MLST4), partial sequence [organism=Botrytis pseudocinerea, strain D12\_KL\_cal2]  
ACCCTTCAATCCCACCGCAGCTCCTATACCGAAAAGCGAGCATCTACCAATTCCTTCCACCTGCGACTTTAAGACCATTGGCTTTTTCGCACT  
TTCACAAAAAAGCATAGTTTAAACATTGACGTCGTCCGCATTACAAGTGTGGCTACTTTTATTTGAAAGCATTTGTGGGACAGGATGGAGGGAAG  
AAGGACTGGCAGAGAGAGTTTTAGAGGAGGTCGCCAAGAGTTGGAAGAATAGGAGTGGTGGTGTATTATGTGCGAGGGCGAGGGAACGGAATTGAA  
GGAGATTCTGAAAGCTTTGGAAGGGAATATGAGTGGTGAAGGATAGTCGTAGGAAGAGAGCTAAGCCGGCAGAACAGTTTAGTACTGGGATCA  
TCACAATATGGAGAGGTCAATCATAACAAGACTTGGGCTACGGCCAGGGAATATACCCAGAGAGGATAGTCAGTCAAGTTTGGGAATGTCAACGT  
TGGAGGTCAATGACGAGGAAGATGAGGATGGCCTGATGGATCCAAGGAGGTGGTTGAAAGTCATTGATGCATTTGAGCAACCCCGACTGGTGT  
TAATGTTGCTAAGAAGCACTTTGATAGGTATGTTTCAATGATAAAAATTTTATCTGAATCAACTAACTCAGTACAGAGATACCTCCAAACCTTCA  
TTGTTCCACCTGCGTCTCATAAAACACTCCTCTTCCAAAACCGCTATAATGTTATCCATCAACATCTCCTTCGCAATGAATCTTTTCAAACGC  
CCGCTTTTCAAGGTGGCAAAGCTTCCCTTCAACGCAGCAGCTCCGCCATTACCCTCAACAACAATCATACAAATTAACGCCGATAGCTAATCT  
TCTCGGTGCAATCGCAGCTCTCATATGCTTCTCGGCCCTCTCAGCATTTCAACCCTGGTACCCTCGCCATCAATGACCTGACGGGCAGCATC  
GCTCTCGATCTTACACACGCAGCAGCCATTC

>Bcin11g01310 (MLST5), partial sequence [organism=Botrytis pseudocinerea, strain D12\_KL\_cal2]  
ACTGACATGGACTTCATGTGGAACCGGCTACAATGCGCAACGCTTGAAGTCCGCTCGAATATGGCGATGCAACGTCAACAGCGAAAGCCAGT  
ATTGCGCTTGCTCGTTATCTGCCACTGTTGCCGCGAGCAAGAAGCTCGGGTCTCTCTTGATAAAATCCCGGTGGACCCGGTGCCACTGGTGTG  
GCTTTGTGCGAGTCTGGAGCCGGTGCCGCCATCTCGACACTGAGTGGTGGATTATACGATATCATCGGATGGGATCCACGTGGAACCCGGTGCTTC  
CGCTCCTATTTTGAATGTTTTCCAAATGCCAGTGGGAGTATGATTTTAAACAACGCTTTCCATCTGCTCCCAATCTCTGGCTCGGACAATTT  
TCAAATGCCAGCGCAAATTCGCGTTAGCTCTGCTATCACATCTTTTGCACCTTCTGTGCTGCTCTTGCAAAAAGCTTGTGTAGCTCAGAAGT  
CCCCCGCTCTTTACACCTCAACAGCAGCATATGTTGCTCGAGACATGGCAGCGATAGTCGATGCCTTGGATGGAACCTCTGCAAAAACCTCAACTA  
CTGGGGTTTCTCATATGGAACATTTTTCTTCCGAGTTTATCCAAACTTTCCAGGCCGCGTGGGAAGAGTTCTTGCCGATGGGGTTTTTCGAC  
GCAAAGGCAAATGCACTCACATACGTTAGCCAACCTTCCAACGATCAACTCAGTGTTCGTGCTTCGTTGAACGATTTTGCAGCTTTCTGTACCA  
CCGCCGGTAGTAAAGGTTGCTCTTTTGCACCCGCCCTACTGGAACCACCGGTACCCTGCTACCAGACTGGACAACATAATGAAGGATATGTT  
CCTCAATCCCATTGTTGCTTCGGGCTTAAGCATCA

>Bcin15g03910 (MLST6), partial sequence [organism=Botrytis pseudocinerea, strain D12\_KL\_cal2]  
GCCAAAACACAAAATCATCCAACGATGAAGATGATACTCCACTGCCCTTAATTAATCTGGCACGGACTCGGGCATAATTACAAAGCGGATGGTCT  
TGCGCAGTTGAAAAGCTAGCTGAAGCTATTCATCCTGGACTTTTGTCTATAAATATTCATGTAGATGAGGATGCATCTGCAGATAGGACAGCTAC  
CTTCTTTGAAAATCTCACTCGTGGGTACATCCCCTAGTCTTCTTTTAAATGCCATGCTGACTCTCTTACCAAGTTCAAATCGAAAAGGTCTGCG  
AAGACCTCGCCTCCATCCTATCTCTTACCAGCCTGCCGTGACGCAATCGGATTCCTCCAAGGCGGCAATTCCTGCGCGGTTACATATC  
CCGCTGCAATTCCTCACCCATCCGCTCTCTCTGACCTTCGGTTCCCAACACAACGGCATTTCTGCTTCCAAGCCTGTGGTCTCGCCGATTTCT  
CTCTGTGCTGGTGTCAAACCTCTTTTGCAGTCCAACACCTGGTCAACCTTTGTCCGATCTCGTCTCGTACCCGCTCAATACTTCAGAGATCCGG  
AAAACCTAGACTCTTACCTTGAATATTTCAATTTCTTGGCGACATCAATAATGAGCGGTTCTCAAGAACCAAACATATAAATCCAACATGGA  
AAAATTTGAAACGATTCGTAATGTATGCTTTGAAAGATGATACAACTGTCATCCCTAAGGAAAGTGGATGGTGGGCTGAAGTCAACGGCAGCGAA  
GTTACACCACTGAAAAGAAAGAGCCATTTATAAGGAAGATTGGCTAGGTTTAAAGACATTTGGATGAGGCCGGAAAATTAGTTTTCGAAACCATTC  
CAGGGGGACATATGACGTTAGGAGAGGAGATGCTAGAGAAGGCTTTCAAAGAGTACTTTGGCCAGCAGGGAAGAAAATTTGGG

>Bcin16g03460 (MLST7), partial sequence [organism=Botrytis pseudocinerea, strain D12\_KL\_cal2]  
ATGAACCTCTTAATTTGAACTCTTCATTAATCGCAAGTGTGAAACCCCTATTTTGGCCAGAGGATAGTTACAAGACGTATATCATTTAGTCGAGA  
ACCCTCATGATATATATTGACGGATTTTGGAAAGCGAATGAAAGTAAACATCTGGTTGATGTTAGGTATGTTACTTATCTGATGAAATGAAC  
AAGAGAAACTGATGAGATAGTGAACCGCTTTATGAACCGTCTACTGTTTCTCACGGACAGGAAGTTACCATTGATACTTCAGTTGCAAAATTCGG

AAGTGGCGGTTTTAGAGAGGGATGAGGCGGTCAGGTGTATTGAGCATAGAGCGAGGGCATTTCAGGGGTGGAGGGATGAGATGGGGATTGAGAA  
GTTGAGGACGCAGAGGTATGGGGTTGGAGGACATTATGGGATGCATTTGTAAGTTTTGGGGGATTGACGAAGGCTTTTGTCTATTTCCATCAG  
TACGGATCTTAAAAGAAAAGATAGCATGAACACGAGGGCTAACAACTAGGAAAATAGCGATTGGAGCGGAGGTAAACGTGGCATAGACCGATTTAG  
TACTTTTCATGGTCTATGTGCGACGTATCTTCTGATATCGAAGGTGGAGGAACGGAAATTTCCACGTATTGTGGGACCACAAGGAGGAAGGTGGGAG  
GAATTCCTGGAAACTACGGAAGCATTGGATCCAAGAACTGAAAAAATGTAACAGTAGAAGGGGTGACATTCAAACCAATCAAGGGAAATGCCG  
TATTCTGGAAAAATACTGACAACAACGGGAGGGGATATGAT

>Bcin12g03020 (MLST8), partial sequence [organism=Botrytis pseudocinerea, strain D12\_KL\_cal2]  
CGATTGGCTGCGAAGAAAACGCGCAGCACCAGTACCCAAAAGCACGAATAAACCGTCGGCAAGAGAAAATATTCTCTGAACCACAACATGACA  
CGAGCGCGGAAGAGTATATTGGGCGAGAAGCTTCATCAAGAGCACCAAAGCGACAACGAGTGCATGATAAATTATAACTCTTACGGTGGAAAGAAA  
TGAAAAATACAGCAGCTTATGCTTCCGGAAAACTTCCATCTGGAAGTATAAATGTTGGTGGAGGTAGGAAGACCCTTTTCAAGAAGAACCCTCGA  
ACGGCATTGTGCTGCGCAAGTTGCCCCCTGGAAGTATCAACATCGGTGGAAAGAAGGCTACCCAAATCGAGGACGAAGGAAGAGCAGCTTATG  
CTTCCGGGAAATTGCCCCAGGAAGTATCAGTCTGGCGCAAAGAAGGCCATTTTCATTCCAAGATGAAACGAGACCAGGCTTATGTCTCTGGAAA  
GCTCCACATGGCAGTATCGATGGTATGCGAAAACCGGAAATGGCTGCCGTCCACCGCGAAAATTGCTGAGGGTGGGAGGAAACCAGGCCAGGTT  
GTCTCTTCTCTATTACATTCATCTACATCAAAGAAAACTTTTCGATGAATCCGAAGAACAAGCGGAACCTGCAAACCATCCAATGCGCCTT  
TGACAGAGGAAATGGAGACATTCACCAATCTAGGATTATCGAGAAGGCTTGACAGCCCATCTATCGACTAACTCGATATGAAAGCCCCGACCGC  
CATTCAAAAAGCATCTGTGCAGCAGTTGGTATCGGACGATAGCGATGCTTTCATACAAGCAGAGACTGGATCTGGAAAACTTTGGCATATCTA  
CTACCTATAGTCGAGCGAATATTAGCATTGAGTGAGAATGGCGTACAAA

>Bcin02g07770 (MLST9), partial sequence [organism=Botrytis pseudocinerea, strain D12\_KL\_cal2]  
CAGCTTTCCTTTCCGTTCTGGCATCTACAGTCATTGCCATGCCACCATCACAACTTGAGTCTCGGGCCGTTATCGATTCCGATGCCGTTG  
TAGGATTTGCCGAAGCTGTTCCAGTGGGACCGTAGGAACAGTTTATGAGGCATATAAACCATTCCTTAAAGTCGTAAATGGATGCGTACCATT  
CCCTGCCGTCGATGCATCGGGTAACACAGGGTATGTCTTATACCTTTCTCTTCTCACGATTGCTATTGAGTCTCTAACATATTTTAGTGGTG  
GTTTGTACCAACTGGCAGTAGCAATGGTGGTTGCAGCAGCAGTACCGGTCAAGTATATGTTTCGAGGAGGACAAAAGCGGATCAAACCTACGCTAT  
CATGTACTCTGGTAAGTTCTCTCTAAACTTCTCCTTATAGATCCAATATCTAACAGAATCTTAGGTACATGCCAAAGGACGAGCCCTCAACCG  
GTATTGGTCCACCGTCACGATTGGGAAGGTGTAATCGTCTGGCTCTCCAGCGCCACCGCCACAACCTGCCGACAACATCTTAGCTGTTTTGTCTTC  
GGCCACGGAGGCTGGGATTGTTCCACCGATGGTTATTCCCTTTCTGGTACCAGCCCTCTTATCAAGTACGAAAAGTATCTGGCCCGTCGACCAT  
TCAATGGGTCTTACTAGTACTGTTGGTGGACAACAACCTATGATTGCTTGGGAGTCTTACCTACTGCTGCTCAAACCTGCTCTTGAGAACACCG  
ATTTCCGGTCTGCGAATGTTCCATTTATTCAGCTGTTTTTCACAAAACAATCT

>Bcin04g02090 (MLST10), partial sequence [organism=Botrytis pseudocinerea, strain D12\_KL\_cal2]  
CGGAGGATGATATGGCAAAGTCTATGATTACCAAAGCATTGTAGGCATGAGTAGTAACTCTCAAATATGACTATGAATGATGTTTTACAAGCC  
CTACATCCATGTAAGAAAATGTAGAATAGAGAGATCAATAACTGGAACATAATATCGTTTTGTAGGCTTTCAAGTTACTTACGCAGTTCAACCCAA  
CACTACAGCTATTGCCGAATCCCCACTATTTCAAATGGCTGTCTCAGCAAATACCATCGAAAAGTACACACTGCTAGGCCCTTTCTTTCAGAATA  
TCTCCTCTGCAACAGGAAGTTACCAGGGAATACTTCAGTGCACCAAAGACGATAGATAGGCGACACATTGCCACATCTCAAGATGCGTTACGAC  
TGACCTTACAAAACCATCAAAAAAGATTTACTCGATATCATCAACCCTTTGTTTCGAGCAAGTCCAATCGCCAAAAGCAAAACCTTGGATTGGTT  
CGCTACATTTGTGAATCAAAAATCACAAGCGTCGAGCACTTCAGGTAGACCCGAAAGAAGTATCTTCTGATGGCTTTATGCACAATGTCACCTGTC  
GTTCTAGATGGTCTTTGTGAGCCATTCATGGATACCACATTTCTCGAAAATTTCAAGATTGATATTGATTATCTAAGACGTGCGCCTCGTGTAG  
ATATCAAGGACGAGACCAAGTTGAACGCCGATGAGAAGGCTTCTGAGAAGTACTATGAGGACACGGTTCCCTGGCACTTCCAATTTTCATCTCTGA  
GGTGTCTTTCTGACATTGGCTGCTCATATTATGGTAGTGAAGCTCTTAATGCCACGCACAAGAGTCTGGAGAAAAGACATCAAATATATTTCAA  
AAGCAATTGACTGCCGTTGAAGCA

>Bcin01g07220 (MLST1), partial sequence [organism=Botrytis pseudocinerea, strain D13\_E\_IF04]  
ATGGCATATCTTGTCTTTCTTTTCGCATTATGCTTTGGAACGTGCTGGACAAGCTTGGGTTAGTGCTCTGCGTGTAGAAGCACTAAAGAAGATTCT  
TGACAACCGAAGTCATGGTTTGGAGAAATCCAGGAATTCACCTGGCCGATTGAACGAAGTTTGGATAGGAACCTGAGGAAATGCGTAATCTC  
GTTGGCCGCTTTGTTGGTATTGATTCACAGCATTTTTTATGTTATTGATATCAATCATTTGGGCTTTTCGTGAATACGTGGAAGCTGACATTAG  
TCTCAATGGCAACTGGGCCAGTTATATACGCTGTCAACAAAACGTTCAATCGCGTGAGTGGAAAATGGGAAAACAAGTGAACCTACGCATCTGA  
AATGACCCTAGCATATTTTTCAGAGACGTTCTCCAACATCAAAGTGGTTCCGGGCTTTTACTCTGGAACCTTACTTTGCGACAAAACACACCCAAA  
GCTACAGAAGAACTTTATAAAGTTGGACTAATACGAGCAAACCTACTCGGGATTGCTGTGGGGATTGACAGATGCGATGTCATTTCTCATCCTG  
CAACTATCTTTTATTATGCCACGGTCTCATTTACCAAGAGAGAGATCAGTATCGCGACTGCACTACAGACTGTCAATCTTCTATTTATTTGGTAT  
TTCTAATAGTACGAATATGCTGGCCATGATACCACAAAATCAAACCTTCTCTCGCGTTACAGTACGCATATGCTTGCATTTAGCCAATCTCGATTCA  
TCTTCTCCACGAAAATCAAGGAACCGAACGACTTTCGACAATCTTTCCAATCAAATTCAAACCGTCTCTCATTCACATATCCTAATCGTCCCTG  
AAAAACGAACGATATCATCTTTTCTCTTTCCCTGATTCCTAACACAACAACCTGCACTTGTGCGACCCCTCCGGCTCCGAAAATCTACAATAGC  
TGCTCTGCTCATTTGGCCTCTATCCACCAGATACTTCAACACCTCCACCGTTGACATTCATCGCGTCTCCATAAGTAACTGTACATCCCCGTCT  
CTCCGGGCTTCTGTCTCACTCGTCCCACAAAATACCGATTCTATTTCCAGCTACCATTCTCCATAACATCATTTATGGGCTCCGAAATCTTCTC  
CTTGTGCTAATCTTCCATCTGCTATTGTATCAGCCAAAGATGCTGGGATCCATGAGTTTATCACATCGCTTCCACAAGGTTATAATGCTAT

>Bcin05g07690 (MLST2), partial sequence [organism=Botrytis pseudocinerea, strain D13\_E\_IF04]  
ACCACATACACCAAGTCTTTTCTGCACTTTCCCTCATCAAAAACGAACGAGAATCATCAATAAAATACTTTGCTGAAGTAATTGGGTTTTATT  
TTGGCCAGGATGCCTTCTCTCTACGACAGCAAGCCTTCGATGATATGTTGTGGGTAGTTCTTGGTTGGTTGGATACTGTCAAATTCATTGATTT  
ACATTCTGAATTGCACTATTCAAATGACTCTCAGCCAGAAATGGTACGGACAACAATATAAACCTGCATTTGCACATCGAGCGGACTATTTTGG  
GAATTGGCGTCAACAAGGATGGGATACTACTCTCTGTGGTGGTGGGATGATATGGTCACCATACCTTACTCCATACAAGAACGCAATTACCAATG  
AACTCTATATCGCAGCTTCGATATCGATGTACCTCTATTTCCCTGGAGATGACAATCAATCCCCATTTATGCTTTCCAACCCCTCATATCCACC  
TCGCGATCCGAAATATCTACAGGCAGCTGTTGATGCTTACAAATGGCTGAATGGTTCCAATATGACGGATTTACAAGGATTTATATGTCGACGGA  
TATCATATCTCGAATCTTTCTGGCGGTGAAAAACCCCATTTGCGATTCTAGAAATGAGATGGTATATACCTACAATCAAGGTGTTTTGCTTACTG  
GACAACGTGGTTTTGTATGACGCAACCGCCGACGATCATACCTTGTGGATGGCCACAACTCATCGCAATGTTATTAACGCCACAGGCTATGA  
TCTGAAACACGATGTTGTTATCTCACCGCCACCCAAAGATGGTTCCGCATTGGCAAAATGGTTTTGGCTGGGTAGGAATGGAATACGGAAGAA  
GGATGCGATTCAAGTGCTTCGTGTTCTCAAAAATGGACAAAATTTCAAAGGCATATTTCTTTTCATCACTTGATTGCATTTCTGTAGTGATTTGCCAG  
GGGAGCCTATTGCGAGGACGAAAGAAAGCCTGGAACCTGCACAGAGAGTGGCATTCTGACAAATGCTCGCAGTATACAAAAT

>Bcin06g01710 (MLST3), partial sequence [organism=Botrytis pseudocinerea, strain D13\_E\_IF04]  
GTGAGTCCGGCTTTTGTATCTGAGCGTTAAGATAGACACTGATATACCAAGGCAATCACCTAATTTTCATGGCTTTCTTCCCTGCATCATCTACC  
TACCCTGGAATGCTTGGAGAATTATACTCCGACGCTTTCACAGCTCCTGCTTTCAATTGGATCTGTTCCCTGCTGTGACAGAATTGGAGACGG  
TTGTAATGGATTGGCTGGCAAGCTTCTCAATCTCCAGACTGTTATTTGCTTCGACTCATGGTGGTGGTGTATCCAAGGATCAGCCTCGGA  
AGCTATCGTTACCGTTATGGTTGCTGCCCGGATAAAATATCTTCGTGAAACTACTGAAGGTCGTGACGGCATTGAACTCGAGGGTGCATTTGCA  
TATAAGAGGAGTAAGCTAGTTGCACTAGGAAGCGAAATGGCACACAGCTCCACGCGAGAAAGCAGCGCAGATAGCTGGCGTTAGATTCCGATCGA  
TTCCAGTACTCGCATCCAATGATTTGCGCATGACGGGTGATGATCTAGAGAAGGTATTGAAAGAATGCAAATCTCAAGGATTGGAACCCCTTCTA  
TCTAACTTCGACTTTGGGAACAACATCTACATGTGCAGTTGATGACTTCGCATCTATCGCAACAGTACTTTGAAATATGCACCTCCAGATGTT  
GCAGGCGAGATATGGGTTACGTCGATGCTGCTTATGCAGGCGCAGCTTTGGTTTGGCCCTGAATACCATCATCTAACATCGTCTTCCAGCAT  
TTCATTCTTCGATATGAACATGCACAAATGGCTTTTGACAAAATTTGACGCTTCTTGTCTATATGTCAAGAAACGCAAAGATCTGATCGATGC  
ACTCTCTATAACACCAAGTTATCTTCGCAACGAGTTTTTCAGAGAGTGGACTCGTGACCGACTATCGGGACTGGCAAATTCCTCTCGGAAGACGC  
TTCCGAAGCTTAAAGATTTGGTTTTGCTCTCAGAACCCTAC

>Bcin09g03030 (MLST4), partial sequence [organism=Botrytis pseudocinerea, strain D13\_E\_IF04]  
ACCCTTCAATCCACCGCAGCTCCTATACCGAAAGCGAGCATCTACCAATTTCTCTTCCACCTGCGACTTTAAGACCATTGGCTTTTTCGCACT  
TTCACAAAAAAGCATAGTTTAAACATTTGACGTCGTCCGCATTACAAGTGTGGCTACTTTTATTTGGAAAGCATTTGTGGGACAGGATGGAGGGAAG  
AAGGACTGGCAGAGAGAGTTTTAGAGGAGGTCGCCAAGAGTTGGAAGAATAGGAGTGGTGGTGTATTGTGTCAGGGCGAGGGAACGGAATTGAA  
GGAGATTCTGAAAGCTTTGGAAGGGAATATGAGTGGTGGAAAGGATAGTCGTAGGAAGAGAGCTAAGCCGGCAGAACAGTTTAGTACTGGGATCA  
TCACAATATGGAGAGGTCAATCATACAAGACTTTGGGCTACGGCCAGGGAATATACCCAGAGAGGATAGTCAGTCAAGTTTGGGAATGTCAACGT  
TGGAGGTCAATGACGAGGAAGATGAGGATGGCCTGATGGATCCAAGGAGGTGGTTGAAAGTCATTGATGCATTTGAGCAACCCCGACTGGTGTA  
TAATGTTGCTAAGAAGCACTTTGATAGGTATGTTTCAATGATAAAAATTTTATCTGAATCAACTAACTCAGTACAGAGATACCTCCAAACCTTCA  
TTGTTCCACCTGCGTCTCATAAAACACTCCTCTTCCAAAACCGCTATAATGTTATCCATCAACGTCTCCTTCGCAATGAATCTTTTCAAACGC  
CCGCTTTTCAAGGTGGCAAAGCTTCCCTTCAACGCGACGCTCCGCCATTACCCTCAACAACAATCATACAAATTAACGCCGATAGCTAATCT  
TCTCGGTCGCAATCGCAGCTCTCATATGCTTCTCGGCCCTCTCAGCATTTACCCACTGGTACCCTCGCCATCAATGACCTGACGGGCAGCATC  
GCTCTCGATCTTACACACGCAGCAGCCATCC

>Bcin11g01310 (MLST5), partial sequence [organism=Botrytis pseudocinerea, strain D13\_E\_IF04]  
ACTGACATGGACTTCATGTGAAACC GGCGTACAATGGCGAACGCTTGAAGTTCGGCTCGAATATGGCGATGCAACGTCAACAGCGAAAGCCAG  
TATTGCGCTTGTCTGTTATCCTGCCACTGTTTGGCCGAGCAAGAAGCTCGGGTCTCTCTTGATAAAATCCCGGTGGACCCGGTGCCACTGGTGT  
TGGCTTTGTGCACTTGGAGCCGGTGCCGCATCTCGACACTGAGTGGTGGATTATACGATATCATCGGATGGGATCCACGTGGAACCCGGTGTCT  
TCCGCTCCTATTTTGGAAATGTTTTCCAAATGCCAGTGCAGGAGTATGATTTTAAACAACGCGTTTCCATCTGCTCCCAATCTCTGGCTCGGACAAT  
TTTCAAATGCCAGCGCAAATTTCTGCCGTTAGCTCTGCTATCACATCTTTTGACACTTCTGTCTGCTGCTTTGCAAAAAGCTTGTGTAGCTCAGAA  
GTCCCGCTCTTTACACCTCAACAGCAGCATATGTTGCTCGAGACATGGCAGCGATAGTCGATGCCTTGGATGGAACCTCTGCAAACTCAACT  
ACTGGGGTTTTCTCATATGGAATATTTTCTTGGCGAGTTTATCCAAACTTTCCAGGCCGCGTGGGAAGAGTTCTTGGCCGATGGGTTTTTCGAC  
GCAAAGGCAAATGCACTCACATACGTTAGCCAACCTTCCCAACGATCAACTCAGTGTTCGTGCTTCTGTTGAACGATTTTGCAGCTTTCTGTACCA  
CCGCCGATAGTAAAGGTTGCTCTTTTGGCACCGCCCTACTGGAACCACCGTACCCTTGTACCAGACTGGACAACATAATGAAGGATATGTT  
CCTCAATCCATTGTTGCTTCGGGCTTAAAGCATCA

>Bcin15g03910 (MLST6), partial sequence [organism=Botrytis pseudocinerea, strain D13\_E\_IF04]  
GCCAAAGCACAAAATCATCCAACGATGAAGATGATACTCCACTGCCCTTAATTTATCTGGCACGACTCGGCGATAATTACAAAGCGGATGGTCT  
TGCGCAAGTTGGAAAGCTAGCTGAAGCTATTCATCTGGGACTTTTGTCTATAATATTCATGTAGATGAGGATGCATCTGCAGATAGGACAGCT  
ACCTTCTTTGGAAATCTCACTCGTGGGTACATCCCTAGTCTTCTTTTAAATGCCATGCTGACTCTCTTACCAAGTTCAAATCGAAAAGGTCTG  
CGAAGACCTCGCCTCCCATCCTATTTCTCTTACC GCGCTGCCGTCGACGCAATCGGATTTCCCAAGGCGCCAAATTTCTGCGCGGTTACATA  
TCCCGCTGCAATTTCCACCATCCGCTCTCTCTGACCTTCGGTTCCCAACACAACGGCATTCTGCTTCCAAGCCTGTGGTCTGCCGATT



TCCTCTGTCTGGTCTCAAACCTCTTTTTCGCGATCCAACACCTGGTCAACCTTTGTCCAATCTCGTCTCGTACCCGCTCAATACTTCAGAGATCC  
GGAAAACCTAGACTCTTACCTTGAATATTTCCAATTTCTTTGCGGACATCAATAATGAGCGGTTCTCAAGAACCAAACATATAAAATCCAACATG  
GAAAAATTGGAACGATTCGTAATGTATGTCTTTGAAAGATGATACAACCTGTCATCCCTAAGGAAAGTGGATGGTGGGCTGAAGTCAACGGCACGG  
AAGTTACACCACTGAAAAGAAAGAGCCATTTATAAGGAAAGATTGGCTAGGTTTAAAGACATTTGGATGAGGCCGAAAAATTAGTTTTTCGAAACCAT  
TCCAGAGGGACATATGACGTTAGGAGAGGAGATGCTAGAGAAGGCTTTCAAAGAGTACTTTGGCCAGCAGGGAAGAAATTTGGG

>Bcin16g03460 (MLST7), partial sequence [organism=Botrytis pseudocinerea, strain D13\_E\_IF04]  
ATGAACCTCTTAATTTGAACTCTTCATTAATCGCAAGTGATGAACCCCTATTTTGGCCAGAGGATAGTTACAAGACGTATATCATTAGTCGAGA  
ACCACTCATGATATATATTGACGGATTTTGAAGCGAATGAAAGTAAACATCTGGTTGATGTTAGGTATGTTACTTATTCTGATGAAATGAAC  
AAGAGAAACTGATGAGATAGTGAACCGCTTTATGAACCGTCTACTGTTTCTCACGGACAGGAAGTTACCATTGATACTTCAGTTTCGAAATTCGG  
AAGTGGCGGTTTTAGAGAGGGATGAGGTGGTCAGGTGTATTGAGCATAGAGCGAGGGCATTTTCAGGGGTGGAGGGATGAGATGGGGATTGAGAA  
GTTGAGGACCGAGAGGTATGGGGTTGGAGGACATTATGGGATGCATTTGTAAGTTTTGGGGATTGACGAAGGCTTTTGTCTATTTCCATATCAG  
TACGGATCTTAAAAGAAAGATAGCATGAACACGAGGGCTAACAACTAGGAAATAGCGATTGGAGCGGAGGTAAACGTGGCATAGACCGATTTAG  
TACTTTTCATGGTCTATGTGACGATCTTCTGATATCGAAGGTGGAGGAACGGAAATTTCCACGTATTGTGGGACCACAAGGAGGAAGGTGGGAG  
GAATTCCTGGAAACTACGGAAGCATTGGATCCAAGAACTGGAAAAAATGTAACAGTAGAAGGGGTGACATTCAAACCAATCAAGGGAAATGCCG  
TATTCTGGGAAAATACTGACAACAACGGGAGGGGATATGAT

>Bcin12g03020 (MLST8), partial sequence [organism=Botrytis pseudocinerea, strain D13\_E\_IF04]  
CGATTGGCTGCGAAGAAAACCTGCGCAGCACCGAGTCACCAAAAGCACGAATAAACCGTTCGGCAAGAGAAAATATTCTCTGAACCACAACATGACA  
CGAGCGCGAAGAGTATATTGGGCGAGAAGCTTCATCAAGAGCACCAAAGCGACAACGAGTCGATGATAAATTATAACTCTTACGGTGGAAAGAAA  
TGAAAATACAGCAGCTTATGCTTCCGAAAAACTTCCATCTGGAAGTATAAATGTTGGTGGAGGTAGGAAGACCACTTTTCAAGAAGAACCCTCGA  
ACGGCATTGTGCTGGCAAGTTGCCCCCTGGAAGTATCAACATCGGTGGAAAGAGGCTACCCAAATCGAGGACGAAGGAAGAGCAGCTTATG  
CTTCCGGGAAAATTGCCCCAGGAAGTATCAGCTCTGGCGCAAAGAGGCCATTTTCATTCCAAGATGAAACGAGACCGGCCTATGTCTCTGGAAA  
GCTCCACATGGCAGTATCGATGGTATGCGAAACCGGAAATGGCTGCCGTCCACCGCGAAAATGCTGAGGGTGGGAGGAAACCAGGCCAGGTT  
GTCTCTTCTATTCACATTCATCTACATCAAAGAAAACCTTCGATGAATCCGAAGAACAAAGCGGAACCTGCAAACCATCCAATGCGCCTT  
TGACAGAGGAAAATGGAGACATTCACCAATCTAGGATTATCGAGAAGGCTTGACAGCCATCTATCGACTAAACTCGATATGAAAGCCCCGACCGC  
CATTCAAAAAGCATCTGTGCAGCAGTTGGTATCGGACGATAGCGATGCTTTCATACAAGCAGAGACTGGATCTGGAAAAACTTTGGCATATCTA  
CTACCTATAGTCGAGCGAATATTAGCATTGAGTGAGAATGGCGTACAAA

>Bcin02g07770 (MLST9), partial sequence [organism=Botrytis pseudocinerea, strain D13\_E\_IF04]  
ACAGCTTCCCTTTTCGGTCTTGGCATCTACAGTCATTGCCATGCCTACACCATCACAACTTGAGTCTCGGGCCGTTATCGATTCCGATGCCGT  
TGTAGGATTTGCCGAAGCTGTTCCAGTGGGACCGTAGGAACAGTTTATGAGGCATATAAACCATTCCTTAAAGTCGTAATGGATGCGTACCAT  
TCCCTGCCGTCGATGCATCGGGTAACACAGGGTATGTCTTATACCTTTCTCTTCCACGATTGCTATTGAGTCTCTAACATATTTTAGTGGT  
GGTTTGTACCAACTGGCAGTAGCAATGGTGGTTGCAGCAGCAGTACCGGTCAAGTATATGTTTCGAGGAGGACAAAGCGGATCAAACCTACGCTA  
TCATGTACTCCTGGTAAGTTTCTCTCTAAACTTCTCCTTATAGATCCAATATCTAACAGAATCTTAGGTACATGCCAAAGGACGAGCCCTCAAC  
CGGTATTGGTACCCTCACGATTGGAAGGTGTAATCGTCTGGCTCTCCAGCGCCACCGCCACAACCTGCCGACAACATCTTAGCTGTTTGTCTT  
CGGCCACGGAGGCTGGGATTGTTCCACCGATGGTTATTCCTTTCTGGTACCAGCCCTCTTATCAAGTACGAAAGTATCTGGCCCGTCGACCAT  
TCAATGGGTCTTACTAGTACTGTTGGTGGACAACAACCTATGATTGCTTGGGAGTCTTTACCTACTGCTGCTCAAACCTGCTCTTGAGAACACCG  
ATTTCCGGTGTGCGAATGTTCCATTTATTCAGCTGCTTTACAAAACAATCT

>Bcin04g02090 (MLST10), partial sequence [organism=Botrytis pseudocinerea, strain D13\_E\_IF04]  
CGGAGGATGATATGGCAAAGTCTATGATTACCAAAGCATTTTGTAGGCATGAGTAGTAAACTCTCAAATATGACTATGAATGATGTTTACAAGC  
CCTACATCCATGTAAGAAATGTAGAATAGAGAGATCAATAACTGGAACATAATATCGTTTGTAGGCTTTCAAGTTACTTACGCAGTTTCAACCCA  
ATCACTACAGCTATTGCCGAATCCCCACTATTTCAAATGGCTGTCTCAGCAAATACCATCGAAAAGTACACACTGCTAGGCCCTTTCTTCAGAA  
TATCTCCTCTGCAACAGGAAGTTACCAGGGAATACTTCAGTGCACCAAAGACGATAGATAGGCGACACATGCCACATCTCAAGATGCGTTACG  
ACTGACCTTACAAACCCATCAAAAAGATTTACTCGATATCATCAACCCTTTGTTTCGAGCAAGTCCAATCGCCAAAAGCAAACCTTGGATTGG  
TTCGCTACATTTGTGAATCAAAAATCACAAGCGTCGAGCACTTCAGGTAGACCCGAAAGAGTATCTTCTGATGGCTTTATGCACAATGTCACCTG  
TCGTTCTAGATGGTCTTTGTGAGCCATTCATGGATACCGCATTTCTCGAAAATTTCGAAGATTGATATTGATTATCTAAGACGTGCGCCTCGTGT  
AGATATCAAGGACGAGACCAAGTTGAACCGGATGAGAAGGCTTCTGAGAAGTACTATGAGGACACGGTTCCCTGGCATTCCAATTTTCATCTCT  
GAGGTGTTCTTTCTGACATTTGGCTGCTCATTTATGGTAGTGAGGCTCTTAATGCCACGCACAAGAGTCTGGAGAAAGACATCAAATATATTC  
AAAAGCAATTGACTGCCGTTGAAGCA

>Bcin01g07220 (MLST1), partial sequence [organism=Botrytis pseudocinerea, strain N11\_K\_W15]  
ATGGCATATCTTGTCTTTTTCGATTTATGCTTTGGAACGTGCTGGACAAGCTTGGGTTAGTGCTCTGCGTGTAGAAGCACTAAAGAAGATTCT  
TGCACAACCGAAGTCATGGTTTGGAGGAAATCCAGGAATTCACCTGGCCGATGAAACGAAAGTTTTGGATAGGAACTCTGAGGAAATGCGTAATCTC  
GTTGGCCGCTTTGTTGGTATTGTATTACACGATTTTTTATGTTATTGATATCAATCATTGGGCTTTTCGTGAATACGTGGAAGCTGACATTAG  
TCTCAATGGCAACTGGGCCAGTTATATACGCTGTCACCAAAACGTTCAATCGCGTGTAGTGAAAAATGGGAAAACAAGTGAACCTACGCATCTGA

AATGACCCTAGCATATTTTCAGAGACGTTCTCCAACATCAAAGTGGTTCGGGCTTTTACTCTGGAACTTACTTTGCGACAAAACACACCAA  
GCTACAGAAGAACTTTATAAAGTTGACTAATACGAGCAAACACTCGGGATTGCTGTGGGATTGACAGATGCGATGTCATTCTTCATCACTGC  
AACTATCTTTTATTATGCCACGGTTCTCATTACCAAGAGAGAGATCAGTATCGCGACTGCACTACAGACTGTCAATCTTCTATTATTTGGTATT  
TCTAATAGTACGAATATGCTGGCCATGATACCACAAATCAAACCTTCTCGCGTTACAGCTACGCATATGCTTGCATTAGCCAATCTCGATTCA  
CTTCTCCACGAAAATCAAGGAACCGAACGACTTTCGACAATCTTTCCAATCAAATTCACCGTCTCTCATTCACATATCCTAATCGTCCCTGA  
AAAACGAACGATATCATCCTTTCTCTTTCCCTGATTCTTAACACAACAACTGCACCTTGTGGACCTCCGGCTCCGAAAATCTACAATAGCTG  
CTCTGCTCATTGGCCTCTATCCACCAGATACTTCAACACCTCCACCGTTGACATTCATTCGCGTCTCCATAAGTAACTGTCACATCCCGTCTCT  
CCGGGCTTCTGTCTCACTCGTCCACAAATACCGATTCTATTTCCAGCTACCATTCTCCATAACATCATTTATGGCTCCAGAATCTTCTCCTTGT  
GCTAATCTTCCATCTGCTATTGTATCAGCCAAAGATGCTGGATCCATGAGTTTATCACATCGCTTCCACAAGGTTATAATGCTAT

>Bcin05g07690 (MLST2), partial sequence [organism=Botrytis pseudocinerea, strain N11\_K\_W15]  
ACCCTATCACCAAGTCTTTTCTGCACTTTCCCTCATCAAAAACGAACGAGAACATCATCAATAAAATACTTTGCTGAAGTAATTGGGTTTTATT  
TTGGCCAGGATGCCTTCTCTACGACGCAAGCCTTCGATGATATGTTGTGGTAGTTCTTGGTTGGTTGGATACTGTCAAATTCATTGATTT  
ACATTCTGAATTGCACTATTCAAATGACTCTCAGCCAGAATGGTACGGACAACAATATAAACCTGCATTTGCACATCGAGCGGACTATTTTGG  
GAATTGGCGTCACAAGGATGGGATACTACTCTCTGTGGTGGTGGGATGATATGGTCACCATACTTACTCCATAACAAGAACGCAATTACCAATG  
AACTCTATATCGCAGCTTCGATATCGATGTACCTCTATTTCCCTGGAGATGACAATCAATCCCCATTTATGCTTTCCAACCTTCATATCCACC  
TCGCGATCCGAAATATCTACAGGACGCTGTTGATGCTTACAAATGGCTGAATGGTTCCAATATGACGGATTTACAAGGATTAATATGTCGACGGA  
TATCATATCTCGAATCTTTCTGGCGGTGAAAAACCCATTGCGATTCTAGAAATGAGATGGTATATACTTACAATCAAGGTGTTTTGCTTACTG  
GACAACGTGGTTTTGTATGACGCAACCGCCGACGATCATACCTTGTGGATGGCCACAAACTCATCGCAATGTTATTAACGCCACAGGCTATGA  
TCTGAAACACGATGTTGTATCTCACCGCCACCCAAAGATGGTTCCGCATTGGCAAAATGGTTTGGCTGGGTAGGAATGGAATACTGGAAGAA  
GGATGCGATTCAAGTGCTTCGTGTTCTCAAAATGGACAACTTTCAAAGCATACTTTTTCATCACCTGATTGCATTTCTGTAGTGATTTGCCAG  
GGGAGCCTATTGCGAGGACGAAAAGAAAGCCTGGAACCTCGACAGAGAGTGGCATTCTGACAAATGCTCGCAGTATACAAAAT

>Bcin06g01710 (MLST3), partial sequence [organism=Botrytis pseudocinerea, strain N11\_K\_W15]  
GGTGAGTCCGGCTTTTGTATCTGAGCGTTAAGATAGACTGATATACCAAGGCAATCACCTAATTTTCATGGCTTTTCTCCCTGCATCATCTAC  
CTACCCTGGAATGCTTGGAGAATTATACTCCGACGCTTTCACAGCTCCTGCTTTCAATGGATCTGTTCCCTGCTGTGACAGAATTGGAGACG  
GTTGTAATGGATTGGCTGGCCAAGCTTCTCAATCTCCAGACTGTTATTTGTCTTCGACTCATGGTGGTGGTGTATCCAAGGATCAGCCTCGG  
AAGCTATCGTTACCCTTATGGTTGCTGCCCGGATAAATATCTTCGTGAACTACTGAAGGTCTGTCAGGCATTGAACTCGAGGATGCGATTGC  
ATATAAGAGGAGTAAGCTAGTTGCACTAGGAAGCGAAAATGGCACACAGCTCCACGCAGAAAGCAGCGCAGATAGCTGGCGTTAGATTCCGATCG  
ATTCCAGTACTCGCATCCAATGATTTCCGCCATGACGGGTGATGATCTAGAGAAGGTATTGAAAGAATGCAAATCTCAAGGATTGGAACCTTCT  
ATCTAACTTCGACTTTGGGAACAACATCTACATGTGCAGTTGATGACTTCGCATCTATCGCAACAGTACTTTGAAAATATGCACCTCCAGATGT  
TGCAGGCGAGATATGGGTTACGTCGATGCTGCTTATGCGAGGCGAGCTTTGGTTTTGCCCTGAATACCATCATCTAACATCGTCTTCCAGCAT  
TTTCATTTCTTCGATATGAACATGCACAAAATGGCTTTTGCACAAATTTGACAGCTTCTTGTCTATATGTCAAGAAACGCAAAGATCTGATCGATG  
CACTCTCTATAACACCAAGTTATCTTTCGCAACGAGTTTTCAGAGAGTGGACTCGTGACCGACTATCGGGACTGGCAAATTCCTCTCGGAAGACG  
CTTCCGAAGCTTAAAGATTTGGTTTGTCTCAGAACCCTACG

>Bcin09g03030 (MLST4), partial sequence [organism=Botrytis pseudocinerea, strain N11\_K\_W15]  
ACCCTTCAATCCCACCGCAGCTCCTATACCGAAAGCGAGCATCTTACCAATTTCTCTTCCACCTGCGACTTTAAGACCATTTGGCTTTTTCGCACT  
TTCACAAAAAAGCATAGTTTAAACATTTGACGTCGTCCGCATTACAAGTGTGGCTACTTTTATTTGGAAAGCATTTGTGGGACAGGATGGAGGGAAG  
AAGGACTGGCAGAGAGAGTTTTAGAGGAGGTCGCCAAGAGTTGGAAGAATAGGAGTGGTGGTGTATTGTGTCAGGGGCGAGGGAACGGAATTGAA  
GGAGATTCTGAAAGCTTTGGAAGGGAATATGAGTGGTGGAAAGGATAGTCTAGGAAGAGAGCTAAGCCGGCAGAACAGTTTAGTACTGGGATCA  
TCACAATATGGAGAGGTCAATCATAACAAGACTTGGGCTACGGCCAGGGAATATACCAGAGAGGATAGTCAAGTTTGGGAATGTCAACGT  
TGGAGGTCAATGACGAGGAAGATGAGGATGGCCTGATGGATCCAAGGAGTGGTTGAAAGTCATTGATGCATTTGAGCAACCCCGACTGGTGTGA  
TAATGTTGCTAAGAAGCACTTTGATAGGTATGTTTCAATGATAAAAATTTTATCTGAATCAAACCTAAGTACAGAGATACCTCCAAACCTTCA  
TTGTTCCACCTGCGTCTCATAAAAACACTCCTCTTCCAAAACCGCTATAATGTTATCCATCAACGTCTCCTTCGCAATGAATCTTTTCAAACGC  
CCGCTTTTCAAGGTGGCAAAGCTTCCCTTCAACGCAGCACGTCCGCCATTACCCTCAACAACAATCATACAAATTAACGCCGATAGCTAATCT  
TCTCGGTGCGAATCGCAGCTCTCATATGCTTCTCGGCCCTCCTCAGCATTTCAACCACTGGTACCCTCGCCATCAATGACCTGACGGGCAGCATC  
GCTCTCGATCTTACACACGCAGCAGCCATTC

>Bcin11g01310 (MLST5), partial sequence [organism=Botrytis pseudocinerea, strain N11\_K\_W15]  
ACTGACATGGACTTCATGTGGAACCGGCTACAATGCGCAACGCTTGAAGTTCGCTCGAATATGGCGATGCAACGTCAACAGCGAAAGCCAGT  
ATTGCGCTTGCTCGTTATCTGCCACTGTTGCCGCGAGCAAGAAGCTCGGGTCTCTCTTGATAAAATCCCGGTGGACCCGGTGCCACTGGTGTG  
GCTTTGTGAGTCTGGAGCCGGTGCCGCATCTCGACACTGAGTGGTGGATTATACGATATCATCGGATGGGATCCACGTGGAACCGGTGCTTC  
CGCTCCTATTTTGGAAATGTTTTCCAAATGCCAGTGGGAGTATGATTTTAAACAACGCGTTTCCATCTGCTCCCAATCTCTGGCTCGGACAATTT  
TCAAATGCCAGCGCAAATTTCTGCCGTTAGCTCTGCTATCACATCTTTTGCACCTTCTGTGCGTGTCTTGGCAAAAGCTTGTGTAGCTCAGAAGT  
CCCCCGCTCTTTACACCTCAACAGCAGCATATGTTGCTCGAGACATGGCAGCGATAGTGCATGCTTGGATGGAACCTCTGCAAACTCAACTA  
CTGGGGTTTCTCATATGGAACATTTTCTTCCGAGTTTATCCAACTTTCCAGGCCGCGTGGGAAGAGTTCTTGGCGATGGGGTTTTTCGAC

GCAAAGGCCAAATGCACTCACATACGTTAGCCAACCTTCCCAACGATCAACTCAGTGTTTCGTGCTTCGTTGAACGATTTTGCAGCTTCTGTACCA  
CCGCCGGTAGTAAAGGTTGCTCTTTTGCACCGCCCCACTGGAACCCCGGTACCGTTGCTACCAGACTGGACAACATAATGAAGGATATGTT  
CCTCAATCCCATTGTTGCTTCGGGCTTAAGCATCA

>Bcin15g03910 (MLST6), partial sequence [organism=Botrytis pseudocinerea, strain N11\_K\_W15]  
GCCAAAACACAAAAATCATCCAACGATGAAGATGATACTCCACTGCCCTTAATTATCTGGCAGGACTCGGGGATAATTACAAAGCGGATGGTC  
TTGCGCAAGTTGGAAAAGCTAGCTGAAGCTATTTCATCCTGGGACTTTTGTCTATAACATTCATGTAGATGAGGATGCATCTGCAGATAGGACAGC  
TACCTTCTTTGGAAATCTCACTCGTGGGTACATCCCCTAGTCTTCTTTTAAATGCCATGCTGACTCTCTTACCAAGTTCAAATCGAAAAGGTCT  
GCGAAGACCTCGCCTCCCATCCTATTCTCTCTACCGCGCTGCCGTGACGCAATCGGATTCCTCCAAGGCGGCAATTCTTGCAGGTTACAT  
ATCCCGCTGCAATTCCTCACCCATCCGCTCTCTCCTGACCTTCGGTTCCCAACACAACGGCATTTCTGCCCTCCAAGCCTGTGGTCCCTGCCGAT  
TTCTCTGTGCTGGTGTCTCAAACTCTTTTGGGATCCAACACCTGGTCAACCTTTGTCCAATCTCGTCTCGTACCCGCTCAATACTTCAGAGATC  
CGGAAAACCTAGACTCTTACCTTGAATATTCCAATTTCTTGGCGACATCAATAATGAGCGCGTCTCAAGAACCAAACATATAAATCCAACAT  
GGAAAATTTGAACGATTGTAATGTATGTCTTTGAAGATGATACAACTGTCATCCCTAAGGAAAGTGGATGGTGGGCTGAAGTCAACGGCAGC  
GAAGTTACACCCTGAAAAGAAAGACCATTTATAAGGAAAGATTGGCTAGGTTTAAAGACATTGGATGAGGCCGGAAAATTAGTTTTCGAAAACCA  
TTCCAGGGGGACATATGACGTTAGGAGAGGAGATGCTAGAGAAGGCTTTCAAAGAGTACTTTGGCCCAGCAGGGAAGAAATTTGGG

>Bcin16g03460 (MLST7), partial sequence [organism=Botrytis pseudocinerea, strain N11\_K\_W15]  
ATGAACCTCTTAATTTGAACTCTTCATTAATCGCAAGTGATGAACCCCTATTTTGGCCAGAGGATAGTTACAAGACGTATATCATTAGTCGAGA  
ACCCTCATGATATATATTGACGGATTTTTGAAAAGCGAATGAAAAGTAAACATCTGGTTGATGTTAGGTATGTTACTTATTCTGATGAAATGAAC  
AAGAGAAACTGATGAGATAGTGAACCGCTTTATGAACCGTCTACTGTTTCTCACGGACAGGAAGTTACCATTGATACTTCAGTTCGAAATTCGG  
AAGTGGCGGTTTTAGAGAGGGATGAGGTGGTCAGGTGATTTGAGCATAGAGCGAGGGCATTTTCAGGGGTGGAGGGATGAGATGGGGATTGAGAA  
GTTGAGGACGCAGAGGTATGGGGTTGGAGGACATTATGGGATGCATTTGTAAGTTTTGGGGGATTGACGAAGGCTTTTGTCTATTTCTTATCAG  
TACGGATCTTAAAAGAAAAGATAGCATGAACACGAGGGCTAACAACTAGGAAATAGCGATTGGAGCGGAGGTAAACGTGGCATAGACCGATTTAG  
TACTTTTATGGTCTATGTGACGATCTTCTGATATCGAAGGTGGAGGAACGGAATCCCACGTATTGTGGGACCACAAGGAGGAAGGTGGGAG  
GAATTCCTGGAACTACGGAAGCATTTGGATCCAAGAACTGGAAAAAATGTAACAGTAGAAGGGGTGACATTCAAACCAATCAAGGGAAATGCC  
TATTCTGGGAAAATACTGACAACAACGGGAGGGGATATGAT

>Bcin12g03020 (MLST8), partial sequence [organism=Botrytis pseudocinerea, strain N11\_K\_W15]  
CGATTGGCTGCGAAGAAAACCTGCGCAGCACCGAGTCACCAAAAGCACGAATAAACCGTCGGCAAGAGAAAATATCTCTGAACCACAACATGACA  
CGAGCGCGGAAGAGTATATTGGGCGAGAAGCTTCATCAAGAGCACCAAGCGACAACGAGTCGATGATAATTATAACTCTTACGGTGGAAAGAAA  
TGAAAATACAGCAGCTTATGCTTCGGAAAACCTCCATCTGGAAGTATAAATGTTGGTGGAGGTAGGAAGACCCTTTTCAAGAAGAACCCTCGA  
ACGGCATTGTGCTGGCAAGTTGCCCCCTGGAAGTATCAACATCGGTGGAAAGAAAGGCTACCCAAATCGAGGACGAAGGAAGAGCAGCTTATG  
CTTCCGGGAAAATTTGCCCCAGGAAGTATCAGCTCTGGCGCAAAGAAAGGCCATTTTCATTCCAAGATGAAACGAGACCAGGCTATGTCTCTGAAA  
GCTCCACATGGCAGTATCGATGGTATGCGAAAACCGGAAAATGGCTGCCGTCCACCGCGAAAATGCTGAGGGTGGGAGGAAACCAGGCCAGGTT  
GTCTCTTCTTATTACATTCATCTACATCAAAGAAAACCTTCGATGAATCCGAAGACAAGCGGAACCTGCAAAACCATCCAATGCGCCTT  
TGACAGAGGAAAATGGAGACATTCACCAATCTAGGATTTATCGAGAAGGCTTGCAGCCATCTATCGACTAAACTCGATATGAAAGCCCCGACCGC  
CATTCAAAAAGCATCTGTGCAGCAGTTGGTATCGGACGATAGCGATGCTTTCATACAAGCAGAGACTGGATCTGGAAAAACTTTGGCATATCTA  
CTACCTATAGTCGAGCGAATATTAGCATTGAGTGAGAATGGCGTACAAA

>Bcin02g07770 (MLST9), partial sequence [organism=Botrytis pseudocinerea, strain N11\_K\_W15]  
CAGCTTTCCCTTTTCGGTCTTGGCATCTACAGTCATTGCCATGCCACCATCACAACTTGAGTCTCGGGCCGTTATCGATTCCGATGCCGTTG  
TAGGATTTGCCGAAGCTGTTCCAGTGGGACCGTAGGAACAGTTTATGAGGCATATAAACCATTCCTTAAAGTCGTAAATGGATGCGTATCATT  
CCCTGCCGTGATGCATCGGGTAACACAGGGTATGTCTTATACTTTCTCTTCCCTCACGATTGCTATTGAGTCTCTAACATATTTTGTAGTGGT  
GTTTGTACCAAACTGGCAGTAGCAATGGTGGTTGCGAGCAGCAGTACCGGTCAAGTATATGTTTCGAGGAGGACAAAGCGGATCAAACCTACGCTAT  
CATGTACTCTGGTAAAGTTCTCTCTAACTTCTCCTTATAGATCCAATATCTAACAGAATCTTAGGTACATGCCAAAGGACGAGCCCTCAACCG  
GTATTGGTCACCGTCACGATTGGGAAGGTGTAATCGTCTGGCTCTCCAGCGCCACCGCCACAACCTGCCGACAACATCTTAGCTGTTTGTCTTC  
GGCCACGGAGGCTGGGATTTGTTCCACCGATGGTTATTCCTTTCTGGTACCAGCCCTCTTATCAAGTACGAAAAGTATCTGGCCCGTCGACCAT  
TCAATGGGTCTTACTAGTACTGTTGGTGGACAACAACCTATGATTGCTTGGGAGTCTTTACCTACTGCTGCTCAAACCTGCTCTTGAGAACACCG  
ATATCGGTGCTGCGAATGTTCCATTTATTCCAGCTGTTTTCAACAACAATCT

>Bcin04g02090 (MLST10), partial sequence [organism=Botrytis pseudocinerea, strain N11\_K\_W15]  
GCGGAGGATGATATGGCAAGGCTATGATTACCAAGCATTTGTAGGCATGAGTAGTAACTCTCAAATATGACTATGAATGATGTTTACAAGC  
CCTACATCCATGTAAGAAATGTAGAATAGAGAGATCAATAACTGGAACATAATCGTTTGTAGGCTTTCAAGTTACTTACGCAGTTCAACCCAA  
TCACTACAGCTATTGCCGAATCCCCTACTATTTCAAATGGCTGTCTCAGCAAAATACCATCGAAAAGTACACACTGCTAGGCCCTTTCTTTCAGAAT  
ATCTCTCTGCAACAGGAAGTTACCAGGGAACTACTTCAGTGCACCAAGACGATAGATAGGCCGACACATTGCCACATCTCAAGATGCGTTACGA  
CTGACCTTACAAACCCATCAAAAAGATTTACTCGATATCATCAACCACTTTGTTTCGAGCAAGTCCAATCGCCAAAAGCAAACCTTTGGATTGGT  
TCGCCTACATTTGTAATCAAAAACACAAGCGTCGAGCACTTCAGGTAGACCCGAAAAGATATCTTCTGATGGCTTTATGCACAATGTCAGTGT

CGTTCTAGATGGTCTTTGTGAGCCATTCATGGATACCACATTTCTCGAAAATTTGAAAGATTGATATTGATTATCTAAGACGTGCGCCTCGTGTA  
GATATCAAGGACGAGACCAAGTTGAACGCCGATGAGAAGGCTTCTGAGAAGTACCATGAGGACACGGTTCCTGGCACTTCCAATTTTCATCTCTG  
AGGTGTTCTTTCTGACATTGGCTGCTCATCATTTATGGTAGTGAAGCTCTTAATGCCACGCACAAGAGTCTGGAGAAAGACATCAAATATATTTCA  
AAAGCAATTGACTGCCGTTGAAGCAGA

>Bcin01g07220 (MLST1), partial sequence [organism=Botrytis pseudocinerea, strain N11\_S\_E06]  
ATGGCATATCTTGTCTTTCTTTTCGCATTATGCTTTGGAACGTGCTGGACAAGCTTGGGTTAGTGTCTGCGTGTAGAAGCACTAAAGAAGATTCT  
TGCAACAACCGAAGTCATGGTTTTGAGGAATCCAGGAATTCACCTGGCCGATGGAACGAAGTTTTGGATAGGAACCTTGAGGAAATGCGTAATCTC  
GTTGGCCGCTTTGTTGGTATTGTATTACAGCATTTTTTATGTTATTGATATCAATCATTGGGCTTTCTGTAATACGTGGAAGCTGACATTAG  
TCTCAATGGCAACTGGGCCAGTTATATACGCTGTCACCAAAACGTTCAATCGCGTGAGTGGAAAATGGGAAAACAAGTGAACCTACGCATCTGA  
AATGACCACCTAGCATATTTTCAGAGACGTTCTCCAACATCAAAGTGGTTTCGGGCTTTTACTCTGGAAAACCTACTTTGCGACAAAACACACAAA  
GCTACAGAAGAACCTTTATAAAGTTGGACTAATACGAGCAAACCTACTCGGGATTGCTGTGGGGATTGACAGATGCGATGTCATTCTTCATCACTG  
CAACTATCTTTTATTATGCCACGGTCTCATTACCAAGAGAGAGATCAGTATCGCGACTGCACTACAGACTGTCAATCTTCTATTATTTGGTAT  
TTCTAATAGTACGAATATGCTGGCCATGATACCACAAAATCAACTCTTCTCGCGTTACAGCTACGCATATGCTTGCATTAGCCAATCTCGATTCA  
TCTTCTCCACGAAAATCAAGGAACCGAACGACTTTTCGACAATCTTTCCAATCAAATTCACCCTCTCTCATTACATATCCTAATCGTCCTG  
AAAAACGAACGATATCATCCTTTTCTCTTTCCCTGATTCTTAACACAACAACCTGCACTTGTTCGACCCCTCCGGCTCCGAAAATCTACAATAGC  
TGCTCTGCTCATTGGCCTCTATCCACCAGATACTTCAACACCTCCACCGTTGACATTCAATCGCGTCTCCATAAGTAACGTGCACATCCCGTCT  
CTCCGGGCTTCTGTCTCACTCGTCCACAAAATACCGATTCTATTTCCAGCTACCATTCTCCATAACATCATTTATGGGCTCCGAGAATCTTCTC  
CTTGTGCTAATCTTCCATCTGCTATTGTATCAGCCAAAGATGCTGGGATCCATGAGTTTATCACATCGCTTCCACAAGGTTATAATGCTAT

>Bcin05g07690 (MLST2), partial sequence [organism=Botrytis pseudocinerea, strain N11\_S\_E06]  
ACCCTATCACCAAGTCCCTTTCTGCACTTTCCCTCATCAAAAAACGAACGAGAACATCATCAATAAATACTTTGCTGAAGTAATTGGGTTTTATT  
TTGGCCAGGATGCCCTTCTCTCTACGACAGCAAGCCTTCGATGATATGTTGTGGTAGTCTTGGTTGGTTGGATACTGTCAAATTCATTGATTT  
ACATTCTGAATTGCACTATTCAAATGACTCTCAGCCAGAAATGGTACGGACAACAATATAAACCTGCATTTGCACATCGAGCGGACTATTTTGG  
GAATTGGCGTCACAAGGATGGGATACTACTCTCTGTGGTGGTGGGATGATATGGTCACCATACTTACTCCATAACAAGAACGCAATTACCAATG  
AACTCTATATCGCAGCTTCGATATCGATGTACCTCTATTTCCCTGGAGATGACAATCAATCCCCATTTATGCTTTCCAACCCCTTCATATCCACC  
TCGCGATCCGAAATATCTACAGGCAGCTGTTGATGCTTACAAATGGCTGAATGGTTCCAATATGACGGATTTACAAGGATTATATGTCGACGGA  
TATCATATCTCGAATCTTTCTGGCGGTGAAAACACCCATTGCGATTCTAGAAAATGAGATGGTATATAACCTACAATCAAGGTGTTTTGCTTACTG  
GACAACGTGGTTTTGTATGACGCAACCGCCGACGATCATACCTTGTGGATGGCCACAACTCATCGCGAATGTTATTAACGCCACAGGCTATGA  
TCTGAAAACACGATGTTGTATCTCACCGCCACCCAAAGATGGTTCCGCATTTGGCAAATGGTTTTGGCCTGGGTAGGAATGGAATACCTGGAAGAA  
GGATGCGATTCAAGTGCTTCGTGTTCTCAAAATGGACAACTTTCAAAGGCATATTTCTTTCATCACTTGATTGCATTCTGTAGTGATTTGCCAG  
GGGAGCCTATTCAGGGACGAAAAGAAAGCCTGGAACCTGCACAGAGAGTGGCATTCTGACAAAATGCTCGCAGTATACAAAAT

>Bcin06g01710 (MLST3), partial sequence [organism=Botrytis pseudocinerea, strain N11\_S\_E06]  
TGGTGAGTCCGGCTTTTGTATCTGAGCGTTAAGATAGACACTGATATACCAAGGCAATCACCTAATTTTCATGGCTTTCTTCCCTGCATCATCTA  
CCTACCCTGGAATGCTTGGAGAATTTACTCCGAGCTTTTCACAGCTCCTGCTTTCCAATTTGGATCTGTTCCCTGCTGTGACAGAATTTGGAGA  
CGGTTGTAATGGATTGGCTGGCCAAGCTTCTCAATCTCCAGACTGTTATTTGTCTTCGACTCATGGTGGTGGTGTATCCAAGGATCAGCCTC  
GGAAGCTATCGTTACCGTTATGGTGTGCCCCGATAAATATCTTCGTGAACTACTGAAGTCTGTCAGGCATTGAACCTGAGGATGCGATTG  
CATATAAGAGGAGTAAGCTAGTTGCACTGGAAGCGAAAATGGCACACAGCTCCACGCAGAAAGCAGCGCAGATAGCTGGCGTTAGATTCCCGATC  
GATTCCAGTACTCGCATCCAATGATTTTCGCCATGACGGGTGATGATCTAGAGAAGGTAATTGAAAGAAATGCAAATCTCAAGGATTGGAACCCCTC  
TATCTAACTTCGACTTTGGGAACAACATCTACATGTGCAGTTGATGACTTCGCATCTATCGCAACAGTACTTTTCGAAAATATGCACCTCCAGATG  
TTGCAGGCGAGATATGGGTTACGTCGATGCTGCTTATGCAGGCGAGCTTTGGTTTGGCCTGAATACCATCATCTAACATCGTCCTTCCAGCA  
TTTTTCAATTCCTTCGATATGACATGCACAAAATGGCTTTTCGGACAAAATTTTCGACGCTTCTTGTCTATATGTCAAGAAACGCAAAGATCTGATCGA  
TGCACTCTCTATAACACCAAGTTATCTTCGCAACGAGTTTTTCAGAGAGTGGACTCGTGACCGACTATCGGACTGGCAAATTCCTCTCGGAAGAC  
GCTTCCGAAGCTTAAAGATTTGGTTTTGTCTCAGACCTACG

>Bcin09g03030 (MLST4), partial sequence [organism=Botrytis pseudocinerea, strain N11\_S\_E06]  
ACCCTTCAATCCCACCGCAGCTCCTATACCGAAAAGCGAGCATCCTACCAATTTCTCCTTCCACCTGCGACTTTAAGACCATTGGCTTTTTCGCAC  
TTCACAAAAAAGCATAGTTTAAACATTGACGTCGTCCGCAATACAAGTGTGGCTACTTTTTATTGGAAAAGCATTTGTGGGACAGGATGGAGGGAAG  
AAGGACTGGCAGAGAGAGTTTTAGAGGAGGTCGCCAAGAGTTGGAAGAATAGGAGTGGTGGTGTATTTGTGCGAGGGCGAGGGAACGGAATTTGAA  
GGAGATTCTGAAAAGCTTTGGAAGGGAATATGAGTGGTGGAAAGGATAGTCTGAGGAAAGAGAGTAAAGCCGGCAGAACAGTTTAGTACTGGGATCA  
TCACAATATGGAGAGGTCATACATAAAGACTTTGGGCTACGGCCAGGGAATATACCCAGAGAGGATAGTCAAGTGTGGGAATGTCAACGT  
TGGAGGTCAATGACGAGGAAGATGAGGATGGCCTGATGGATCCAAGGAGTGGTTGAAAGTCAATTGATGCATTTGAGCAACCCCGACTGGTGT  
TAATGTTGCTAAGAAGCACTTTGATAGGTATGTTTCAATGATAAAAATTTTATCTGAATCAACTAACCTCAGTACAGAGATACTCCAAACCTTCA  
TTGTTCCACCTGCGTCTCATAAAAACACTCCTCTTCCAAAACCGCTATAATGTTATCCATCAACGCTCTCCTTCGCAATGAATCTTTTCAAACGC  
CCGCTTTTCAAAGGTGGCAAAGCTTCCCTTCAACGCAGCAGCTCCGCCATTACCCTCAACAACAATCATACAAATTAACGCCGATAGCTAATCT  
TCTCGGTCGCAATCGCAGCTCTCATATGCTTCTCGGCCCTCAGCATTTACCCACTGGTACCCTCGCCATCAATGACCTGACGGGACGATCG

CTCTCGATCTTACACACGCAGCAGCCATTC

>Bcin11g01310 (MLST5), partial sequence [organism=Botrytis pseudocinerea, strain N11\_S\_E06]  
GACTGACATGGACTTCATGTGGAACCGGCGTACAATGCGCAACGCTTGAAGTTCGCTCGAATATGGCGATGCAACGTCAACAGCGAAAGCCAG  
TATTGCGCTTGCTCGTTATCCTGCCACTGTTGCCGCGAGCAAGAAGCTCGGGTCTCTCTTGATAAAATCCCGGTGGACCCGGTGCCACTGGTGT  
GGCTTTGTGCAGTCTGGAGCCGGTGCCGCATCTCGACACTGAGTGGTGGATTGTACGATATCATCGGATGGGATCCACGTGGAACCGGTGCTT  
CCGCTCCTATTTTGAATGTTTTCCAAATGCCAGTGCAGGAGTATGATTTTAAACAACGCGTTTTCCATCTGCTCCCAATCTCTGGCTCGGACAATT  
TTCAAATGCCAGCGCAAATTTCTGCCGTTAGCTCTGCTATCACATCTTTTGACACTTCTGTGCTGCTCTTGCAAAGCTTGTGTAGCTCAGAAG  
TCCCCCGCTCTTTACACCTCAACAGCAGCATATGTTGCTCGAGACATGGCAGCGATAGTCGATGCCTTGATGGAACCTCTGCAAAACTCAACT  
ACTGGGGTTTTCTCATATGGAACATTTTCTTGGCGAGTTTATCCAAACTTTCCAGGCCGCGTGGGAAGAGTTCTTGCCGATGGGGTTTTTCGA  
CGCAAAGGCAAATGCACTCACATACGTTAGCCAACTTTCCAAACGATCAACTCAGTGTTCGTGCTTCGTTGAACGATTTTGCAGCTTTCTGTACC  
ACCGCCGGTAGTAAAGGTTGCTCTTTTGCCACCGCCCCACTGGAACCACCGGTACCCTTGCTACCAGACTGGACAACATAATGAAGGATATGT  
TCCTCAATCCCATTTGTTGCTTCGGGCTTAAGCATCAG

>Bcin15g03910 (MLST6), partial sequence [organism=Botrytis pseudocinerea, strain N11\_S\_E06]  
GCCAAAACACAAAATCATCCAACGATGAAGATGATACTCCACTGCCCTTAATTTATCTGGCACGACTCGGCGATAATTACAAAGCGGATGGTCT  
TGCGCAAGTTGGAAAGCTAGCTGAAGCTATTCATCTGGGACTTTTGTCTATAAATTCATGTAGATGAGGATGCATCTGCAGATAGGACAGCT  
ACCTTCTTTGGAAATCTCACTCGTGGGTACATCCCTAGTCTTCTTTTAAATGCCATGCTGACTCTCTTACCAAGTTCAAATCGAAAAGGCTCTG  
CGAAGACCTCGCCTCCCATCCTATTCTCTTACC GCGCTGCCGTCGACGCAATCGGATTTCTCCAAAGGCGCCAATTTCTTGCGCGGTTACATA  
TCCCCTGCAATTTCTCCACCCATCCGCTCTCTCTGACCTTCGGTTCCCAACACAACGGCATTCTGCCTTCCAAGCCTGTGGTCTGCCGATT  
CCTCTGTGCTGGTGTCAAACCTTTTGGGATCCAACACCTGGTCAACCTTTGTCCAATCTCGTCTCGTACCCGCTCAATACCTCAGAGATCCG  
GAAAACCTAGACTCTTACCTTGAATATTTCCAATTTCTTGGCCGACATCAATAATGAGCGGTTCTCAAGAACCACAAACATATAAATCCAACATGG  
AAAAATTTGAACGATTCTGTAATGTATGCTTTGAAGATGATACAACCTGTCATCCCTAAGGAAAGTGGATGGTGGGCTGAAGTCAACGGCAGCGGA  
AGTTACACCACTGAAAGAAAGAGCCATTTATAAGGAAGATTGGCTAGGTTTAAAGACATTTGGATGAGGCCGAAAATTAGTTTTCGAAACCATT  
CCAGGGGGACATATGACGTTAGGAGAGGAGATGCTAGAGAAGGCTTTCAGAGAGTACTTTGGCCAGCAGGGAAGAAATTTGGG

>Bcin16g03460 (MLST7), partial sequence [organism=Botrytis pseudocinerea, strain N11\_S\_E06]  
ATGAACCTCTTAATTTGAACTCTTCATTAATCGCAAGTGTGAAACCCATTTTTGCCAGAGGATAGTTACAAGACGTATATCATTTAGTCGAGA  
ACCACCTCATGATATATATTGACGGATTTTTGAAAAGCGAATGAAAAGTAAACATCTGGTTGATGTTAGGTATGTTACTTATTTCTGATGAAATGAAC  
AAGAGAAAAGTATGAGATAGTGAACCGCTTTATGAACCGTCTACTGTTTCTCACGGACAGGAAGTTACCATTGATACTTCAGTTGCAAAATCGGA  
AGTGGCGGTTTTAGAGAGGGATGAGGTGGTCAAGTGTATTGAGCATAGAGCGAGGGCATTTCAGGGGTGGAGGGATGAGATGGGGATTGAGAAG  
TTGAGGACGCAGAGGTATGGGGTTGGAGGACATTTATGGGATGCATTTGTAAGTTTTTGGGGATTGACGAAGGCTTTTTGTCTATTTCTTATCAGT  
ACGGATCTAAAAGAAAAGATAGCATGAACACGAGGGCTAAACACTAGGAAATAGCGATTGGAGCGGAGGTAAACGTGGCATAGACCGATTTAGTAC  
TTTCATGGTCTATGTGCGACGTATCTTCTGATATCGAAGGTGGAGGAACGGAATTTCCACGTATTTGTGGGACCACAAGGAGGAAGGTGGGAGGAA  
TTCTTGAAAACCTACGGAAGCATTGGATCCAAGAACTGGAAAAAATGTAACAGTAGAAGGGGTGACATTTCAAACCAATCAAGGGAATGCCGTAT  
TCTGGGAAAATACTGACAACAACGGGAGGGGATATGAT

>Bcin12g03020 (MLST8), partial sequence [organism=Botrytis pseudocinerea, strain N11\_S\_E06]  
CGATTGGCTGCGAAGAAAAGTGCAGCACCAGTCAACAAAAGCACGAATAAACCGTTCGGCAAGAGAAAATTTCTCTGAACCACAACATGACA  
CGAGCGCGGAAGAGTATATTGGGCGAGAAGCTTCATCAAGAGCACAAAAGCGACAACGAGTCGATGATAAATTATAACTCTTACGGTGGAAAGAAA  
TGAAAATACAGCAGCTTATGCTTCCGGAAAAGTTCATCTGGAAGTATAAATGTTGGTGGAGGTAGGAAGACCCTTTTCAAGAAGAACCCTCGA  
ACGGCATTGTGCTGGCAAGTTGCCCTTGAAGTATCAACATCGGTGAAAAGAAAGGCTACCCAAATCGAGGACGAAGGAAGAGCAGCTTATG  
CTTCCGGGAAAATTTGCCCCAGGAAGTATCAGCTCTGGCGCAAAGAAGGCCATTTCAATCCAAGATGAAACGAGACCGGCCATGTCTCTGGAAA  
GCTCCACATGGCAGTATCGATGGTATGCGAAAACCGCGAAAATGGCTGCCGTCACCGCGAAAATTTGCTGAGGGTGGGAGGAAACCAGGCCAGGTT  
GTCTCTTCTCTATTTACATTTCAATCTACATCAAAGAAAAGTTCGATGAATCCGAAGAACAAGCGGAACCTGCAAAAACCATCCAATGCGCCTT  
TGACAGAGGAAAATGGAGACATTTACCAATCTAGGATTTATCGAGAAGGCTTGCAGCCATCTATCGACTAAACTCGATATGAAAGCCCCGACCGC  
CATTTAAAAAGCATCTGTGCAGCAGTTGGTATCGGACGATAGCGATGCTTTCATACAAGCAGAGACTGGATCTGAAAAAAGTTCGGCATATCTA  
CTACCTATAGTCGAGCGAATATTAGCATTGAGTGAGAATGGCGTACAAATA

>Bcin02g07770 (MLST9), partial sequence [organism=Botrytis pseudocinerea, strain N11\_S\_E06]  
CAGCTTTCCCTTTTCGGTCTTGGCATCTACAGTCAATGCCATGCCATACACCATCACAACTTGAGTCTCGGGCCGTTATCGATTCCGATGCCGTTG  
TAGGATTTGCCGAAGCTGTTCCAGTGGGACCGTAGGAACAGTTTATGAGGCATATAAACCATTTCTTAAAGTCGTAAACGGAAGCGTACCATT  
CCCTGCCGTCGATGCATCGGGTAAACAGGGTATGTCTTATACCTTTCTCTTCCCTACGATTGCTATTGAGTCTTAACATATTTTAGTGGTG  
GTTTGTACCAACTGGCAGTAGCAATGGTGGTTGCGACGAGCAGTACCGGTCAAGTATATGTTTCGAGGAGGACAAAGCGGATCAAACACGCTAT  
CATGTACTCCTGGTAAAGTTCTCTCTAAAAGTTCCTTATAGATCCAATATCTAACAGAATCTTAGGTACATGCCAAAGGACGAGCCTCAACCGG  
TATTGGTACCGTACGATTGGGAAGGTGTAATCGTCTGGCTCTCCAGCGCCACCGCCACAACCTGCCGACAACATCTTAGCTGTTTTGTCTTCC  
GCCACGGAGGCTGGGATTGTTCCACCGATGGTTATTTCCCTTTCTGGTACCAGCCCTTTATCAAGTACGAAAGTATCTGGCCCGTGCACCATT

```
CAATGGGTCTTACTAGTACTGTTGGTGGACAACAACCTATGATTGCTTGGGAGTCTTTACCTACTGCTGCTCAAACCTGCTCTTGAGAACACCGA  
TTTCGGTGCTGCGAATGTTCCATTTATTCAGCTGTTTTACAAAACAATCT
```

```
>Bcin04g02090 (MLST10), partial sequence [organism=Botrytis pseudocinerea, strain N11_S_E06]  
CGGAGGATGATATGGCAAAGTCTATGATTACAAAGCATTGTAGGCATGAGTAGTAACTCTCAAATATGACTATGAATGATGTTTACAAGCCC  
TACATCCATGTAGAAATGTAGAATAGAGAGATCAATACTGGAACATAATATCGTTTTGTAGGCTTTCAAGTTACTTACGCAGTTCAACCCAATCA  
CTACAGCTATTGCCGAATCCCACTATTTCAAATGGCTGTCTCAGCAAATACCATCGAAAAGTACACACTACTAGGCCCTTCTTCAGAATATCTC  
CTCCGCAACAGGAAGTTACCAGGGAATACTTCAGTGCACCAAAGACGATAGATAGGCGACACATTGCCACATCTCAAGATGCGTTACGACTGAC  
CTTACAAACCCATCAAAAAGATTTACTTCGATATCATCAACCACTTTGTTTCGAGCAAGTCCAATCGCCAAAAGCAAAAACCTTGGATTGGTTCGC  
CTACATTGTGAATCAAAATCACAAGCGTCGAGCACTTCAGGTAGACCCGAAAGAAGTATCTTCTGATGGCTTTATGCACAATGTCACCTGTCGTT  
CTAGATGGTCTTTGTGAGCCATTCATGGATAACCACATTTCTCGAAAATTTTCGAAGATTGATATTGATTATCTAAGACGTGCGCCTCGTGTAGATA  
TCAAGGACGAGACCAAGTTGAACGCCGATGAGAAGGCTTCTGAGAAGTACTATGAGGACACGGTTCCTGGCCTTCCAATTTTCATCTCTGAGGT  
GTTCTTTCTGACATTGGCTGCTCATCACTATGGTAGTGAAGCTCTTAATGCCACGCACAAGAGTCTGGAGAAAGACATCAAATATATTTCAAAG  
CAATTGACTGCCGTTGAAGCAG
```

```
>Bcin01g07220 (MLST1), partial sequence [organism=Botrytis pseudocinerea, strain VD256]  
GATGGCATATCTTGTCTTTTCGCATTATGCTTTGGAACGTGCTGGACAAGCTTGGGTTAGTGCTCTGCGTGTAGAAGCACTAAAGAAGATTC  
TTGCACAACCGAAGTCATGGTTTGGAGGAATCCAGGAATTCACCTGGCCGATTGAACGAAGTTTTGGATAGGAACCTGAGGAAATGCGTAATCT  
CGTTGGCCGCTTTGTTGGTATTGTATTCACAGCATTTTTTATGTTATTGATATCAATCATTTGGGCTTTCGTGAATACGTGGAAGCTGACATTA  
GTCTCAATGGCAACTGGGCCAGTTATATACGCTGTACCAAAAACGTTCAATCGCGTGAGTGGAAAATGGGAAAACAAGTGAACCTACGCATCTG  
AAATGACCACTAGCATATTTTCAGAGACGTTCTCCAACATCAAAGTGGTTCGGGCTTTTACTCTGGAACTTACTTTGCGACAAAACACACCAA  
AGCTACAGAAGAACTTTATAAAGTTGGACTAATACGAGCAAACCTACTCGGGATTGCTGTGGGGATTGACAGATGCGATGTCATTTTCATCACT  
GCAACTATCTTTTATTATGCCACGGTTCCTCATTACCAAGAGAGAGATCAGTATCGCGACTGCCTACAGACTGTCAATCTTCTATTATTTGGTA  
TTTCTAATAGTACGAATATGCTGGCCATGATACCACAAATCAACTCTTCTCGGTTACAGCTACGCATATGCTTGCATTAGCCAATCTCGATTC  
ATCTTCTCCACGAAAATCAAGGAACCGAACGACTTTTCGACAATCTTTCCAATCAAATTC AACCGTCTCTCATTACATATCCTAATCGTCTC  
GAAAAACGAACGATATCATCCTTTTCTCTTTCCCTGATTCCTAACACAACAACCTGCCTTGTGCGACCTCCGGCTCCGGAAAATCTACAATAG  
CTGCTCTGCTCATTGGCCTCTATCCACCAGTACTTCAACACCTCCACCGTTGACATTCATTCGCGTCTCCATAAGTAACGTGCACATCCCCTC  
TCTCCGGGCTTCTGTCTCACTCGTCCACAAAATACCGATTCTATTTCCAGCTACCATTCTCCATAACATCATTTATGGGCTCCAGAATCTTCT  
CCTTGTGCTAATCTTCCATCTGCTATTGTATCAGCCAAAAGATGCTGGGATCCATGAGTTTATCACATCGCTTCCACAAGGTTATAATGCTAT
```

```
>Bcin05g07690 (MLST2), partial sequence [organism=Botrytis pseudocinerea, strain VD256]  
ACCACTATACCAAGTCTTTTCTGCACTTTCTCATCAAAAACGAACGAGAACATCATCAATAAATACTTTGCTGAAGTAATGGGTTTTATT  
TTGGCCAGGATGCCTTCTCTTACGACAGCAAGCCTTCGATGATATGTTGTGGGTAGTCTTGGTTGGTTGGATACTGTCAAATTCATTGATTT  
ACATTCTGAATTGCACTATTCAAATGACTCTCAGCCAGAATGGTACGGACAACAATATAAACCTGCATTTGCACATCGAGCGCGACTATTTTGG  
GAATTGGCGTCACAAGGATGGGATACTACTCTCTGTGGTGGTGGATGATATGGTACCATACTTACTCCATAACAAGAACGCAATTACCAATG  
AACTCTATATCGCAGCTTCGATATCGATGTACCTCTATTTCCCTGGAGATGACAATCAATCCCCATTTATGCTTTCCAACCCCTCATATCCACC  
TCGCGATCCGAAAATATCTACAGGCAGCTGTTGATGCTTACAAATGGCTGAATGGTTCCAATATGACGGATTTACAAGGATTTATATGTCGACGGA  
TATCATATCTCGAATCTTTCTGGCGGTGAAAACACCCATTGCGATTCTAGAAATGAGATGGTATATACCTACAATCAAGGTGTTTTGCTTACTG  
GACAACGTGGTTTGTATGACGCAACCGCCGACGATCATACCTTGTGGATGGCCACAACTCATCGGAATGTTATTAACGCCACAGGCTATGA  
TCTGAAAACACGATGTTGTTATCTCACCGCCACCCAAAAGATGGTTCGCAATTTGGCAAATGGTTTTGGCTGGGTAGGAATGGAATCTGGAAGAA  
GGATGCGATTCAAGTGCTTCGTGTTCTCAAAAATGGACAAAATTTCAAAGGCATATTTCTTTCATCACTTGATTGCATTTCTGTAGTGATTTGCCAG  
GGGAGCCTATTGCAGGGACGAAAGAAAGCCTGGAACCTGACAGAGAGTGGCATTTCTGACAAAATGCTCGCAGTATACAAAAT
```

```
>Bcin06g01710 (MLST3), partial sequence [organism=Botrytis pseudocinerea, strain VD256]  
GTGAGTCCGGCTTTTGTATCTGAGCGTTAAGATAGACACTGATATACCAAGGCAATCACCTAATTTTCATGGCTTTCTTCCCTGCATCATCTACC  
TACCCTGGAATGCTTGGAGAATTATACTCCGCAGCTTTACAGCTCCTGCTTTCAATTTGGATCTGTTCCCTGCTGTGACAGAATTTGGAGACGG  
TTGTAATGGATTGGCTGGCCAAGCTTCTCAATCTCCAGACTGTTATTTGCTTTCGACTCATGGTGGTGGTGTATCCAAGGATCAGCCTCGGA  
AGCTATCGTTACCGTTATGGTTGCTGCCCGGATAAATGTCTTCGTGAACTACTGAAGTCTGTTCAGGCATTGAACTCGAGGGTGGCATTTGCA  
TATAAGAGGAGTAAGCTAGTTGCACTAGGAAGCGAAATGGCACACAGTCCACGCAGAAAGCAGCGCAGATAGCTGGCGTTAGATTCCGATCGA  
TTCCAGTACTCGCATCCAATGATTTTCGCCATGACGGGTGATGATCTAGAGAAGGTAATGAAAGAATGCAAATCTCAAGGATTTGGAACCCCTTCTA  
TCTAACTTCGACTTTGGGAACAACATCTACATGTGCAGTTGATGACTTCGCATCTATCGCAACAGTACTTTTCGAAAATATGCACCTCCAGATGCT  
GCAGGCGAGATATGGGTTACGTCGATGCTGCTTATGCAGGCGCAGCTTTGGTTTGGCCCTGAATACCACCATCTAACATCGTCTTCCAGCATT  
TTCATTCTTCGATATGAACATGCACAAATGGCTTTTGACAAAATTCGACGCTTCTTGTCTATATGTCAAGAAACGCAAAGATCTGATCGATGC  
ACTCTCTATAACACCAAGTTATCTTCGCAACGAGTTTTCAGAGAGTGGACTCGTGACCGACTATCGGGACTGGCAAATTCCTCTCGGAAGACGC  
TTCCGAAGCTTAAAGATTTGGTTTGTCTCAGAACCCTAC
```

```
>Bcin09g03030 (MLST4), partial sequence [organism=Botrytis pseudocinerea, strain VD256]
```

ACGACCCTTCAATCCCACCGCAGCTCCTATACCGAAAGCGAGCATCTACCAATTTCTCTTCCACCTGCGACTTTAAGACCATTGGCTTTTCGC  
ACTTTCACAAAAAGCATAGTTTAAACATTGACGTCGTCCGCATTACAAGTGTGGCTACTTTTATTGGAAAGCATTGTGGGACAGGATGGAGGG  
AAGAAGGACTGGCAGAGAGAGTTTTAGAGGAGGTCGCCAAGAGTTGGAAGAATAGGAGTGGTGGTGTATTGTGCGAGGGCGAGGGAACCGAATT  
GAAGGAGATTCTGAAAAGCTTTGGAAGGGAAATATGAGTGGTGGAAAGGATAGTCGTAGGAAGAGAGCTAAGCCGGCAGAACAGTTTTAGTACTGGGA  
TCATCACAATATGGAGAGGTCAATCATAACAAGACTTGGGCTACGGCCAGGGAATATACCCAGAGAGGATAGTCAGTCAAGTTTGGGAATGTCAA  
CGTTGGAGGTCAATGACGAGGAAGATGAGGATGGCTGATGGATCCAAGGAGGTGGTTGAAAGTCATTGATGCATTTGAGCAACCCCGACTGGT  
GTATAATGTTGCTAAGAAGCACTTTGATAGGTATGTTTCAATGATAAAATTTTATCTGAATCAACTAACTCAGTACAGAGATACCTCCAAACCT  
TCATTGTTCCACCTGCGTCTCATAAAAACACTCCTCTTCCAAAACCGCTATAATGTTATCCATCAACGTCTCTTTCGCAATGAATCTTTTCAA  
CGCCCGCTTTTCAAGGTGGCAAAGCTTCCCTTCAACGCAGCAGTCCGCCATTACCACTCAACAACAATCATACAAATTAACGCCGATAGCTAA  
TCTTCTCGGTGCAATCGCAGCTCTCATATGCTTCTCGGCCTCTCAGCATTTACCCACTGGTACCCTCGCCATCAATGACCTGACGGGCAGC  
ATCGCTCTCGATCTTACACACGCAGCAGCCATTC

>Bcin11g01310 (MLST5), partial sequence [organism=Botrytis pseudocinerea, strain VD256]  
ACTGACATGGACTTCATGTGGAACCGGCTACAATGCGCAACGCTTGAAGTTCCGCTCGAATATGGCGATGCAACGTCAACAGCGAAAGCCAGT  
ATTGCGCTTGCTCGTTATCTGCCACTGTTGCCGCGAGCAAGAAGCTCGGGTCTCTCTTGATAAAATCCCGGTGGACCCGGTGCCACTGGTGTG  
GCTTTGTGCAGTCTGGAGCCGGTGCCGCCATCTCGACACTGAGTGGTGGATTATACGATATCATCGGATGGGATCCACGTGGAACCGGTGCTTC  
CGCTCCTATTTTGGAAATGTTTTCAAATGCCAGTGGGAGTATGATTTTAAACAACGCGTTTCCATCTGCTCCCAATCTCTGGCTCGGACAATTT  
TCAAATGCCAGCGCAAATTTGCGGTTAGCTCTGCTATCACATCTTTTGCACACTCTGTGCGTGTCTTGCAAAAGCTTGTGTAGCTCAGAAGT  
CCCCCGCTCTTTACACCTCAACAGCAGCATATGTTGCTCGAGACATGGCAGCGATAGTCGATGCCTTGGATGGAACCTCTGCAAACTCAACTA  
CTGGGGTTTCTCATATGGAACATTTTTCTTGGCGAGTTTATCCAACTTTCCAGCCGCGTGGGAAGAGTTCTTGGCGATGGGGTTTTTCGAC  
GCAAAGGCAAATGCACTCACATACGTTAGCCAATTTCCCAACGATCAACTCAGTGTTCGTGCTTCGTTGAACGATTTTGCAGCTTTCTGTACCA  
CCGCCGGTAGTAAAGGTTGCTCTTTTGGCACCCGCCCTACTGGAACCACCGGTACCCTTGTACCAGACTGGACAACATAATGAAGGATATGTT  
CCTCAATCCCATTGTTGCTTCGGGCTTAAGCATCA

>Bcin15g03910 (MLST6), partial sequence [organism=Botrytis pseudocinerea, strain VD256]  
GCCAAAACACAAAATCATCCAACGATGAAGATGATACTCCACTGCCCTTAATTTATCTGGCACGGACTCGGCGATAATTACAAAGCGGATGGTCT  
TGCGCAAGTTGGAAGCTAGCTGAAGCTATTCATCTGGGACTTTTGTCTATAAATATTCATGTAGATGAGGATGCATCTGCAGATAGGACAGCT  
ACCTTCTTTGAAAATCTCACTCGTGGGTACATCCCTAGTCTTCTTTTAAATGCCATGCTGACTCTCTTACCAAGTTCAAATCGAAAAGGTCTG  
CGAAGACCTCGCCTCCCATCCTATTTCTCTTACCAGCCTGCCGTCGACGCAATCGGATTTCTCCAAGGCGGCCAATTTCTTGCAGGTTACATA  
TCCCCTGCAATTTCTCCACCCATCCGCTCTCTCTGACCTTCGGTTCCCAACACACAGGCATTTCTGCCTTCCAAGCCTGTGGTCTGCCGATT  
TCCTCTGTGCTGGTGTCAAACCTTTTGGGATCCAACACCTGGTCAACCTTTGTCCAATCTCGTCTCGTACCCTCAATACTTTCAGAGATCC  
GGAAAACCTAGACTCTTACCTTGAATATTTCAATTTCTTGGCGACATCAATAATGAGCGGTTCTCAAGAACCACAAACATATAAAATCCAACATG  
GAAAAATTGGAACGATTTCGTAATGTATGCTTTGAAAGATGATACAACTGTCAATCCCTAAGGAAAGTGGATGGTGGGCTGAAGTCAACGGCAGG  
AAGTTACACCACTGAAAGAAAGAGCCATTTATAAGGAAGATTGGCTAGGTTTAAAGACATTTGGATGAGGCCGAAAATTAGTTTTTCGAAACCAT  
TCCAGGGGGACATATGACGTTAGGAGAGGAGATGCTAGAGAAGGCTTTCAAAGAGTACTTTGGCCAGCAGGGAAGAAATTTGGGG

>Bcin16g03460 (MLST7), partial sequence [organism=Botrytis pseudocinerea, strain VD256]  
ATGAACCTCTTAATTTGAACTCTTCATTAATCGCAAGTGATGAACCCCTATTTTGGCCAGAGGATAGTTACAAGACGTATATCATTAGTCGAGA  
ACCACCTCATGATATATATTGACGGATTTTGTAAAGCGAATGAAAGTAAACATCTGGTTGATGTTAGGTATGTTACTTATTTCTGATGAAATGAAC  
AAGAGAAAATGATGAGATAGTGAACCGCTTTATGAACCGTCTACTGTTTCTCACGGACAGGAAGTTACCAATTGATACTTTCAGTTTCGAAATTCGG  
AAGTGGCGGTTTTAGAGAGGGATGAGGTAGTCAGGTGATTTGAGCATAGAGCGAGGGCATTTTCAGGGGTGGAGGGATGAGATGGGGATTGAGAA  
GTTGAGGACGAGAGGTATGGGGTTGGAGGACATTTATGGGATGCATTTGTAAGTTTTGGGGGATTGACGAAGGCTTTTGTCTATTTCTTATCAG  
TACGGATCTTAAAAGAAAAGATAGCATGAACACGAGGGCTAACAACTAGGAAAATAGCGATTGGAGCGGAGGTAACGTTGGCATAGACCGATTTAG  
TACTTTTCATGGTCTATGTGACGATCTTCTGATATCGAAGGTGGAGGAACGGAAATTTCCACGTATTTGTGGGACCACAAGGAGGAAGGTGGGAG  
GAATTCCTGGAACCTACGGAAGCATTGGATCCAAGAACTGGAAAAAATGTAACAGTAGAAGGGGTGACATTTCAAACCAATCAAGGGAAATGCCG  
TATTCTGGGAAAATACTGACAACAACGGGAGGGGATATGAT

>Bcin12g03020 (MLST8), partial sequence [organism=Botrytis pseudocinerea, strain VD256]  
TCGATTGGCTGCGAAGAAAACCTGCGCAGCACCGAGTACCAAAGCAGCAATAAACCGTCCGCAAGAGAAAATATCTCTGAACCACAACATGAC  
ACGAGCGCGGAAGAGTATATTGGGCGAGAAGCTTTCATCAAGAGCACCAAAGCGACAACGAGTCGATGATAAATATAACTCTTACGGTGGAAAGAA  
ATGAAAATACAGCAGCTTATGCTTCCGGAAAACCTCCATCTGGAAGTATAAATGTTGGTGGAGGTAGGAAGACCCTTTTCAAGAAGAACCCTCG  
AACGGCATTGTGCTGCTGGCAAGTTGCCCTTGGAAAGTATCAACATCGGTGGAAGAAGGCTACCCAAATCGAGGACGAAGGAAGAGCAGCTTAT  
GCTTCCGGGAAATTTGCCCCAGGAAGTATCAGCTCTGGCGCAAAGAAGGCCATTTTCATTTCCAAGATGAAACGAGACCGGCCATGTCTCTGGAA  
AGCTCCACATGGCAGTATCGATGGTATGCGAAAACCGGAAAATGGCTGCCGTCACCCGCGAAAATGCTGAGGGTGGGAGGAAACCAGGCCAGGT  
TGCTCTTCTCTATTCACATTCATCTACATCAAAGAAAACCTTTCGATGAATCCGGAAGAACAAGCGGAACCTGCAAAACCATCCAATGCGCCT  
TTGACAGAGGAAATGGAGACATTCACCAATCTAGGATTTATCGAGAAGGCTTGCAGCCATCTATCGACTAAACTCGATATGAAAGCCCCGACCG  
CCATTCAAAAGCATCTGTGCAGCAGTTGGTATCGGACGATAGCGATGCTTTTACATAACAAGCAGAGACTGGATCTGGAAAACCTTTGGCATATCT

ACTACCTATAGTCGAGCGAATATTAGCATTGAGTGAGAATGGCGTACAAATA

>Bcin02g07770 (MLST9), partial sequence [organism=Botrytis pseudocinerea, strain VD256]  
CAGCTTTCCCTTTTCGGTCTTGGCATCTACAGTCATTGCCATGCCATACACCATCACAACTTGAGTCTCGGGCCGTTATCGATTCCGATGCCGTTG  
TAGGATTTGCCGAAGCTGTTCCAGTGGGACCGTAGGAACAGTTTATGAGGCATATAAACCATTCCTTAAAGTCGTAAATGGATGCGTACCATT  
CCCTGCCGTCGATGCATCGGGTAACACAGGGTATGTCTTATACTTTCTCTTCCCTCACGATTGCTATTGAGTCTCTAACATATTTTAGTGGTG  
GTTTGTACCAACTGGCAGTAGCAATGGTGGTTGCAGCAGCAGTACCGGTCAAGTATATGTTTCGAGGAGGACAAAGCGGATCAAACCTACGCTAT  
CATGTACTCTGGTAAGTTCTCTCTAAACTTCTCCTTATAGATCCAATATCTAACAGAATCTTAGGTACATGCCAAAGGACGAGCCCTCAACCG  
GTATTGGTCACCGTCACGATTGGGAAGGTGTAATCGTCTGGCTCTCCAGCGCCACCGCCACAACCTGCCGACAACATCTTAGCTGTTTGTCTTC  
GGCCACGGAGGCTGGGATTGTTCACCGATGGTTATTCCTTTCTGGTACCAGCCCTCTTATCAAGTACGAAAGTATCTGGCCCGTCGACCAT  
TCAATGGGTCTTACTAGTACTGTTGGTGGACAACAACCTATGATTGCTTGGGAGTCTTTACCTACTGCTGCTCAAACCTGCTCTTGAGAACACCG  
ATTTTCGGTCTGCGAATGTTCCATTTATTCAGCTGTTTTTCACAAACAATCT

>Bcin04g02090 (MLST10), partial sequence [organism=Botrytis pseudocinerea, strain VD256]  
CGGAGGATGATATGGCAAAGTCTATGATTACCAAAGCATTTGTAGGCATGAGTAGTAAACTCTCAAATATGACTATGAATGATGTTTACAAGCC  
CTACATCCATGTAAGAAATGTAGAATAGAGAGATCAATAACTGGAACATAATATCGTTTGTAGGCTTTCAAGTTACTTACGCAGTTCAACCCAAT  
CACTACAGCTATTGCCGAATCCCCTACTTTCAAATGGCTGTCTCAGCAAATACCATCGAAAAGTACACACTGCTAGGCCCTTTCTTCAGAATA  
TCTCCTCTGCAACAGGAAGTTACCAGGGAATACTTCAGTGCACCAAAGACGATAGATAGGGCGACACATTCGCACATCTCAAGATGCGTTACGAC  
TGACCTTACAAACCCATCAAAAAGATTTACTCGATATCATCAACCACTTTGTTCGAGCAAGTCCAATCGCCAAAAGCAAAACCTTGGATTGGTT  
CGCTACATTTGTGAATCAAAATCACAAGCGTCGAGCACTTCAGGTAGACCGAAAAGTATCTTCTGATGGCTTTATGCACAATGTCACCTGTC  
GTTCTAGATGGTCTTTGTGAGCCATTCATGGATACCACATTTCTCGAAAATTTGAAAGATTGATATTGATTATCTAAGACGTGCGCCTCGTGTAG  
ATATCAAGGACGAGACCAAGTTGAACGCCGATGAGAAGGCTTCTGAGAAGTACTATGAGGACACGGTTCTGGCACCTTCCAATTTTCATCTCTGA  
GGTGTCTTTCTGACATTGGCTGCTCATCATTATGGTAGTGAAGCTCTTAATGCCACGCACAAGAGTCTGGAGAAAGACATCAAATATATTCAA  
AAGCAATTGACTGCCGTTGAAGCA

>Bcin01g07220 (MLST1), partial sequence [organism=Botrytis cinerea, strain C12\_S\_E1\_5]  
ACGAAGTTTTGGATAGGAACCTCGAGGAAATGCGTAATCTCGTTGGCCGCTTTGCTGGTATTGTATTACAGCATTTTTTTATGCTATTGATATC  
AATCATTGGGCTTTTCGTGAATACATGGAACTGACATTAGTCTCAATGGCGACTGGGCCAGTTATATACGCTGTCACCAAAACGTTCAATCGC  
GTGAGTGGAAAATGGGAAAACAAGTGCAACTACGCATCTGAAATGACCACTGGCATAATTTTCAGAGACTTTCTCCAACATCAAAGTGGTTCCGG  
CTTTTACTCTGGAACTTACTTTGAGACAAAACACACCAAAGCTACAGAAGAATCTATAAAAATTGGACTAATACGAGCAAACCTACTCGGGGTT  
GCTGTGGGGATTGACAGATGCGATGTCATTTCTCATCACTGCAACTATCTTTTATTATGCCACGGTTCTCATTACCAAGAGAGAGATCAGTATC  
GCGACTGCACTGCAGACTGTCAATCTTCTATTTTGGTATTTCTAATAGTACGAATATGCTGGCCATGATACCACAAATCAACTCTTCTCGCG  
TTACAGCTACGCATATGCTTGCATTAGCCAATCTCGATTATCTTCTCCACGAAAAATAAAGGAGCCGAACGGCTTTTCGACAATCTTTCCAAT  
CAAATTC AACCGTCTCTCATTACATATCTTACTCGTCTGAAAAACGAACGATATCATCTTTTCTCTTTCCCTGATTCCCTAACTCAACAAC  
GCACTTGTGCGACCCTCCGGCTCCGAAAATCTACATAGCTGCTCTGCTCGTTGGTCTCTATCCGCCAGATACTTCACACC

>Bcin05g07690 (MLST2), partial sequence [organism=Botrytis cinerea, strain C12\_S\_E1\_5]  
AGGATGCCTTCTCTCTACGACAGCAAGCCTTCGATGATATGTTGTGGTAGTTCTTGGCTGGCTGGATACTGTCAAATTCATTGATTTACATTC  
TGAATTGCACTATTCAAACGACTCTCAGCCAGAAATGGTACGGACAACAATATAAACCTGCATTTGCACATCGAGCGGACTATTTTGGGAATTG  
GCTTCAACAAGGATGGGATACTACTCTCTGTGGTGGTGGGATGATATGGTCACCATACTTACTCCATACAAGAACGCAATTACCAATGAACCTCT  
ATATCGCAGCTTCGATATCGATGTACCTGTATTTCCCCGGAGATGACAATCAATCCCCATTTATGCTTTCCAACCTTTCATATCCACCTCACGA  
TCCGAAATATCTACAGGCACTGTTGATGCTTACAAATGGCTGAATGGTTCCAACATGACGGATTTACAAGGATTATATGTCGACGGGTACCAT  
ATCTCGAATCTTTCTGGCGGTGAAAACACCCATTTGCGATTCTAGAAATGAGATGGTATATACTTACAATCAAGGTGTTTTGCTTACTGGACAAC  
GTGGTTTGTATGACGCAACC GCCGACGATCATACCTTGTAGATGGCCACAACTCATCGCGAATGTTATTAATGCCACAGGCTATGACCTGAA  
ACACAATGTTGTCATCTCACCGCCACCCAAAGATGGTTCCGCATTTGGCAAAGTGGTTTGGCCTGGGTAGGAATGGAATACCTGGAAGAAGGATGC  
GATTCAAGTGTCTCGTGTCTCAAAATGGACAAACTTTCAAAGGCATATCTTTTCATCACTTGATTGCGTTCTGTAGTGATTTGCCAGGGGAGC  
CTATTGCAGGGACGAAGGAA

>Bcin06g01710 (MLST3), partial sequence [organism=Botrytis cinerea, strain C12\_S\_E1\_5]  
CAAGGCAATCACCTAATTTTCATGGCGTTCTTCCCTGCATCATCTACCTACCCTGGAATGCTGGGAGAAATTATACTCAGCAGCTTTTCACAGCTCC  
TGCTTTCAATTGGATCTGTTCCCTGCTGTGACAGAATTTGGAGACGGTTGTAATGGATTGGCTGGCCAAGCTTCTCAATCTCCAGACTGTTAT  
TTGTCTTCGACTCATGGTGGTGGTGTATCCAAGGATCAGCCTCGGAAGCTATCGTTACCGTTATGGTTGCTGCCCGGATAAAATATCTTCGTG  
AAACCACTGAAGGTCTGTCCGGCATTGAACTCGAGGATGCGATTGCATATAAGAGGAGTAAGCTAGTTGCACTAGGAAGCGAAATGGCACACAG  
CTCCACGCAGAAAGCAGCGCAGATAGCTGGCGTTAGATTCCGATCGATTCCAGTACTCGCATCCAATGATTTCCGCATGACGGGTGATGATTTA  
GAGAAGGTATTGAAAAGATGCAAAATCTCAAGGATTGGAACCTTCTATCTAACTTCGACTTTGGGAACAACATCTACATGCGCAGTTGACGACT  
TCGCATCTATTGCAACAGTACTTTCAAAAATATGCACCTCCAGATGTTGCAGGCGAGATCTGGGTTACGTCGATGCTGCTTATGCAGGTGCAGC  
TTTGGTTTGCCTGAATACCATCATCTAACATCGTCTTCCAGCATTTCCATTCCTTCGATATGAACATGCACAAATGGCTTCTGACAAATTTCT



GACGCTTCTTGTCTATATGTCAAGAAACGCAAAGATCTGATCGATGCACTCTCCATAACACCAAGTTATCTTCGCAACGAGTTTTTCAGAGAGCG  
GACTCGTAACCGACTATCGGGACTGGCAAATTCCTCTCGGAAGACGCTTCCGAAGCT

>Bcin09g03030 (MLST4), partial sequence [organism=Botrytis cinerea, strain C12\_S\_E1\_5]

GCAGAGAGAGTCTTGGAGGAGGTCGCCAAGAGTTGGAAGAATAGGAGTGGCGGTGTCAATTGTGCGAGGGCGAGGGAACGGAATTGAAGGAGATTC  
TGAAAGCTTTGGAAGGGAATATGAGTGGTGGAAAGGATAGTCATAGGAAGAGAGCTAAGCCGGCAGAATAGTTTAGTACTGGGATCATCACAATA  
TGGAGAGGTCAATCATAACAAGACTTGGGCTACGGCCAGGGAATATACCCAGAGAGGATAGTCAGTCAAGTTTGGGAATGTCAACGTTGGAGGTC  
AATGACGAGGAAGATGAGGATGGCCTGATGGATCCAAGAAGGTGGTTAAAAGTCATTGATGCATTTGAGCAACCTCGACTGGTGTACAATGTTG  
CTAAAAAGCACTTTGATAGGTATGTTTCAATGATAAAAATTTTATCTGAATCGACTAACTCAGTACAGAGATACCTCCAAACCTTCATTGTTCCC  
ACCTGCGTCTCATAAAACACTCCTCTTCCAAAACCGCTATAATGTTATCCATCAACGTCTCCTTCGCAATGAATCTTTTCAAACGCCCGCTTTT  
CAAGGTGGCAAATCTTCCCTTCAACGCAGCACGTCCGCCATTACCACCCAACAACAATCATACAAAATTAACGCCGATAGCTAATCTTCTCGGTC  
GCAATCGCAGCTCTCATATGCTTCTCGGTCTCCTCAGTATTTACCCACTGGTACCCTCGCCATCAATGACCTG

>Bcin11g01310 (MLST5), partial sequenceorganism=Botrytis cinerea, strain C12\_S\_E1\_5]

TCATGTGGAACCGGCGTAGAATGCGCAACGCTTGAAGTTCCGCTCGAATATGGCGATGCAACGTCAACGGCAAAAGCCAGTGTTCGCGTTGCTC  
GTTATCCTGCCACTGTTGCCCGGAGCAAGAAGCTCGGGTCTCTTGTATAAATCCCGTGGACCCGGTGCCTCTGGTGTGGCTTTGTGCAGTC  
TGGAGCCGGTGGCGCGTCTCGACACTGAGTGGTGGATTGTACGATATCATCGGATGGGATCCACGTGGAACCGGTGCTTCGGCTCCTATTTTG  
GAATGTTTTGCAAATGCCAGTGCAGGATGATGTTTTAACAAACGCGTTTCCATCTGCTCCGAATCTCTGGCTCGGACAAATTTGCGAATGCCAGCG  
CAAATCTGCTGTTAGCTCTGCTATCACATCCTTTGACACTTCTGTGCTGCTCTTGCAAAGCTTGGCTGGCTCAGAAATCTCCCGCTCTTTA  
CACCTCAACAGCAGCATATGTTGCTCGAGACATGGCAGCGATAGTCGATGCATTGGATGGGACCTCTGCAAAACTTAACTACTGGGGTTTCTCA  
TATGAACTATCTTCTAGCTGAGTTTATCCAACTTTCCAGGCCGCTGGGAAGAGTTCTTGCCGATGGTGTTCGACGCAAAGGCAAATG  
CACTCACATACGTTAGCCAACTTCCCAACGATCAACTCAGTGTTCGTGCTTCGTTGAACGATTTTGCAGCTTCTGCACCACCGCCGGTAGTAA  
AGGTTGCTCTTTTGCCACCGCCCTACTGGAACCACAGGTACTGTTGCTACCAGACTGGACAACATAATGAAGGATATG

>Bcin15g03910 (MLST6), partial sequence [organism=Botrytis cinerea, strain C12\_S\_E1\_5]

ATGATACTCCACTTCCCTTGATTATCTGGCATGGACTCGGCGATAAATTACAAAGCGGATGGTCTTGCAGCAAGTTGGAAAACCTAGCTGAAGCTAT  
TCATCCTGGGACTTTTGTCTACAATATTCATGTAGATGAGGATGCATCTGCAGATAGGACAGCTACCTTCTTTGGAAATCTCACCTCGTGAGTAC  
ATCCCTATTTTTCTTTAAATATCATACTAACTCTCTTACCAAGTTCAAATCGAAAAGGCTCTGCGAAGACCTCGCTCCCATCCTATTTCTCTC  
TACCAGCCCGCGCTCGACGCAATGGATTTCTCCCAAGGCGGCAATTTCTTGCGTGGTTACATATCCCGCTGCAATGCTCCACCCATCCGCTCT  
CTCCTGACCTTTGGTTCCCAACACAACGGCATTCTGCTTCCAAGCCTGTGGTCTGCGGATTTCTCTGTGCGGGTGTCAAACCCTTTTG  
GATCCAACACCTGGTCAACCTTTGTCCAATCTGCTCTGTACCCGCTCAATACTTTCAGAGATCCGAAAACCTAGACTCTTACCTTGAATATTC  
CAATTTCTTGGCAGATCAATAATGAGCGGTTCTCAAGAACCAACATATAAATCCAACATGGAAAAATTTGGAACGATTCGTAATGTATGTC  
TTTGAAGACGATACAACCTGTATCCCTAAGGAAAAGTGGATGGTGGGCTGAAGTCAACGGCACGGAAGTTACACCCTGAAAGAAAAGAGCCATTT  
ATAAAGAAGATTGGCTAGGTTTAAAGACATTGGGATGAGGCGGAAAATTAGTTTTCGAAACCATTCAGGGGGACATATGACGTTAGGAGAGG  
AGATGCTAGAGAAGGCTTTCAAAGA

>Bcin16g03460 (MLST7), partial sequence [organism=Botrytis cinerea, strain C12\_S\_E1\_5]

TCTTCATGAACCTCTTAATTTGAACTCTTCATTATTTGCAAGTGATGAACCCCTATTTCTGCCAGAGGATAGTTACAAGACGTATATCATTAG  
TCGAGAACCACCTCATGATATATATTTGACGGATTTTTGAAAAGCGAATGAAAGTAAACATTTGGTTGATGTTAGGTGTGTTATTTATTTCTGATGAA  
ATGAACAAGAGAGACTGATGAGATAGTGAGCCGCTTTATGAACCGTCAACTGTTTCTCACGGACAGGAAGTTACCATTGATCCTTCAGTTCCGGA  
ATTCTGAAGTGGCGGTTTTAGAGAGGGATGAGGTGGTCAGGTGTATTGAGCATAGAGCGAGGGCATTTTCAGGGGTGGAGGGGCGAGATGGGGAT  
TGAGAAGTTGAGGACGAGAGGTATGGGGTTGGAGGACATTATGGGATGCATTTGTAAGTTTTGGGGGATTGACGAAGGCTTCTGTCTATTTTC  
TATCAGCACGGATCTTGAAGAAAAGATAGCATGAACACGCGGGCTAATAACTAGGAAAATAGCGATTGGAGCGGAGGTAACGTTGGCATAGACCG  
ATTTAGTACTTTTCATGGTCTATGTGACGATATCCTCTGATATCGAAGGTGGAGGAACGGAAATTCACCGTATTTGTGGGACCAAAGGAGGAAGG  
TGGGAGGACTTCTTGAAACTACGGAAGCATTGGATCCAAGAACTGGAGAAAATGTAACAGTAGAAGGGGTGACATTCAAACCAATCAAGGGAA  
ATGCCGTATTTCT

>Bcin12g03020 (MLST8), partial sequence [organism=Botrytis cinerea, strain C12\_S\_E1\_5]

GTCACAAAAGCACGAATAAACCATCGGCAAGGGAAATATTTCTGTAACCACAACATGACATGAGCGCGGAAGAGTATATCGGGCGAGAAGCTT  
CATCAAGAGCACCAAAGCGACAACGAGTCGATGATAATTATAACTCTTACGGTGGAAAGAAATGAAAATACAGCAGCTTATGCTTCCGGGAAACT  
TCCATCTGGAAGTATAAATGTTGGTGGAGGTAGGAAAGACCACTTTTCAAGAAGAACCCTCGAACGGCATTTGTGCTGCGTGGCAAGTTGCCCTTGG  
AGTATCAACATTTGGTGGAAAAGAAGCTACCCAAAATCGAGGACGAGGTTAGAGCAGCTTATGCTTCCGAAAATTTGCCCCAGGAAGTATAAAT  
CTGGCGCAAAGAAGCGATTTCAATCCAAGATGAAACGAGACCGGCTTATGTCTCCGAAAAGCTTCCACATGGTAGTATCGACGGTATGCGAAA  
CCGTGAAAATGGCTGCCGTCCACCGGAAAATGCTGAGGGTGGGAGGAAACCAGGTCAGGTTGTCTCTTCTCTATTCACATTCATCCTACTTCA  
AAGAAAACCTTTTCGATGAACCAAGAAACAAGCGGAACCGGCAAAACCATCCAATGCGCCTTTGACAGAGGAAATGGCGACTTTCACCAATCTAG  
GGTATCGAGAAGGCTTGCAGCCCATCTATCGACTAACTCGATATGAAAGCCCGACGGCCATTCAAAAAGCATCTGTGCAGCAGTTGGTATC  
GGACGATAGCGATGCTTTCATACAAGCAGAGACTGGATCTGGAAAACCTTTGGCATATCTACTACCTATAGTCGAGCGAATATTAGCATTTAGT

GAGAATGGCGT

>Bcin02g07770 (MLST9), partial sequence [organism=Botrytis cinerea, strain C12\_S\_E1\_5]  
TG TAGGATTTGCCGAAACTGTTCCAGTGGGACCGTAGGAACAGTTTATGAGGCATATAAACCATTCCTTAAAGTCGTAAATGGATGCGTACCA  
TTCCCTGCCGTCGATGCATCGGGTAACACAGGGTATGTCTTATACCTTTCTCTTCCACACGATTGCTATTGAGTCTCTAACATATTTTAGTGG  
TGGTTTGTACCAACTGGCAGCAGCAATGGTGAATGCAGCAGCAGTACCGGTCAAGTATATGTTTCGAGGAGACAAAGCGGATCAAACACTACGCT  
ATCATGTACTCTGGTAAAGTTCTCTCTAAACTTCTCCTTATAGATCCAACCTAACAAAATCTTAGGTACATGCCAAAGGACGAGCCCTCAACCG  
GTATTGGTCAACGTCACGATTGGGAAGGTGTAATTGTCTGGCTCTCCAGCGCCACCGCCACAACCTGCCGACAACATCTTAGCCGTTTGTCTTC  
CGCCACGGAGGCTGGGATTGTTCCACGGATGGCTATTCCCTTTCTGGTACCAGCCCTTATCAAGTACGAAAGTATCTGGCCCGTCGATCAC  
TCAATGGGTCTTACTAGTACTGTTGGTGGAAAACAACCTATGATTGCTTGGGAGTCTTTACCAACTGCTGCTCAAACCTGCTCTTGAGAACACCG  
ATTTCCGGTGTGCGAATGTTCCATTTCATTCCGGCTGTTTTTCACAGATAATCTTGC

>Bcin04g02090 (MLST10), partial sequence [organism=Botrytis cinerea, strain C12\_S\_E1\_5]  
AACTGTGCAATATGACTATGAATGATGTTTACAAGCCCTACATCCATGTAAGAGATGTAGAATAGAGAGATCAGTAACTGGAACATAATATCGTT  
TG TAGGCTTTCAAGTTACTTACGCAGTTCAACCCAACTACTACAGCTATTGCCGAATCCCCACTGTTTCAAATGGCTGTCTCAGCAAATACCAT  
CGAAAAGTACACACTGCTAGGCCCTTTCTTCAGAATATCTCCTCTGCAACAGGAAGTTACCAGGAATACTTCAGTGCGCCAAAGACGATAGAT  
AGGCGACACATTTGCCACATCTCAAGATGCGTTACGATTTGACCTTACAAAACCCATCAAAAAGATTTACTTTGATATCATCAACCACTTTGTTCGAG  
CAAGTCCAATCGCAAAAAGCAAAAACCTGGATTGGTTTCGCTACATTTGTGAATCAAAAACACAAGCGTTCGAGCACTTCAGGTAGACCCGAAAGA  
AGTGTCTTCTGATGGCTTTATGCACAATGTCAGTGTCTGATGGTCTTTGTGAGCCATTCATGGATACCACATTTCTCGAAAATTTGAAAG  
ATTTGATATTGATTATCTAAGACGTGCGCCTCGTGTAGATATCAAGGACGAGACCAAGTTGAACGCTGACGAGAAGGCTTCTGAGAAGTATTATG  
AGGACACTGTTCTGGCACTTCTAATTTTCATCTCTGAGGTCTTCTTTCTCACATTGG

>Bcin01g07220 (MLST1), partial sequence [organism=Botrytis cinerea, strain D08\_H\_8\_4]  
ATGACAATATTGAAAAGCAAAGGCTCGAAGAGTCACAAAAATACAGTCATTCTACTTCTACCTCACGCATCCGATTGCCAGATGATGATCAGA  
ATTCGTCCATCGAATTGCGAAAATATCAATGACTACCACGCCGATGAAGAAATCAAATCATCTTTCAAATCCCTATTTCACATTCACAACCAAAAA  
GCACATATCTACCATAGTTCCATGTATAGTATTTGCAATCATTAGCGGGCTTCTAAAACCTATATCGGCAATATTTTACGGAAATATCTTTGGT  
ACTCTTACAAATTTTGGGTCCGGTGTCTCACCGCACAAAGAGACCTTACAACATGTCTCGAAATGGTGCATAGCTATAACTGTTCTCGGGGGCG  
CAGTATGGTTGTTGCAAGGCTTGTCTGTGTTGCTGGATGGTATTTGGAGAGCTCCAGGCTAGAAGCGTGCAGGAGAAAATGTTTGGCCGCAT  
GTTGGAGAAGGATTTGGAATGGTTGATCTGCGTAGAGATGGCATTTGGATCATTTAATTCGAATTGAAACGTGTGTGGAATCCATTTATGGT  
CGAAATGAAAACATACTGATTGAACAATAGACAAAATTCGAGAGCTCCAATATCCACATCCCAGCCTCTTGGGTTTCTCCTGTTTGGAGACTGCT  
AGCGCATGTGCAGCTCTTGGGACTGCCTTCTTTTACTCTTGGAACTGACTCTTGTCAATTATAGCGACATTTCCAATTGCCGGTGGAACTTTT  
ATCTAATTTCTAGAAAATGCGCCAGCCATCGAAGCCAGAAAAGAGAGCTATCGCAAGCTTCGAAATTTACAAAATACAGCCATTACAGCCAT  
CGATACTGTCAAAGCATTC AACGGACAGGACCAGGAAGTTTGGCAATACTTCTTAGCAATCAAAAATCAACAGTTTCATTACATGATCCAAGCC  
AGGTCAAATGCATTTCAATTTGGGATTACCAAATTTGTCAATGGTGGCCATCTTTGTTCAAGGCTTTGGGTATGGTCTCACGTTAGTGCATCATG  
GACTAGATGCCGAAAAGGTTCTTACAACCTTCTATGCTTGTGTTGACTGGGATGATGGCTATAGAAGTCGTTTTACCACAATGGCTTGTCTTAGC  
AAAAGGAATGTCCGCTGGAGCGACTCTCAAGTCTATCATGAACCAAGTGAATAGAGGAGGAGTTGCAAAAACCCAGAAAGGGTTAATGGTACCT  
AAAACCTGCAACGGTGATATAGAAGTCAATAATGTAAGTAGAGATAGCCACGATAAACCATCAAGACTAATCAAGATCAGGTTACATTTGGATA  
TCCTTCCAATCGACAGCACAATGCTCTTATAAAAAACAACATTTCTTCTTCTGCTGGCGAGACTGCTTTTGTAGTTGGTAAAAGTGGTCTGGA  
AAGAGTACATTTGGGAACTTGTGCTMAAATTTTACGAGCCACAGGAGGGAAGTATCTTGATAGATGGCCAACGTATACAGGATCTCGATACCG  
ATTTGGCTGAGACGCAACATCACTCTCGTACTGCAGCAGAGTGTGGTATTTCAACGAGACGGTTAGGAAAAACATAGAATTTGGCAAGGAAGGAAT  
AAAAAATGAAGCTGATATCATAGACGCTTCTACAGCCAATCTAGAACAAGTAAATGCCGATCTTCTGATGGACTTGATACATGATTTGGC  
TCTAAGGAGAGACAACTGAGTGGTGGACAAAAACAAGTGTGTCATTTGGCAGGACTAGATTACGAGATGCACCAATCTTGATTTCTTGACGAAG  
GAACTAGTGTCTTGTACTGACCAACCGACTCAAAAATCATGGATAATATTCGAGAAATGGAGGAAAGGAAAAACGACAATTTATTTGTGACTCATGA  
TATTTCCAGATATTGGATGATGACTACGTTTACGTTATGGATCAGAGTAAGGTTGTCCAGGAAGGATATCGTAGGAAGCTTTCTGCGAAAGCA  
AACGGCACTTTTCGCTACATTTTCGCAACTCCCAGGATTGCCGTTGAACAGTGCACAGACTTGTCCAACATCAGAAGAACTCGGACCCCTGGAA  
CACCATTAAC TGAAAGCTTTGAAGACTTTGTTCAAGAAATGAAAACCTCGTTTCTCTACCAAGTCTACAATCTATGGTCCAAATGCAGCAAATCG  
TAGGTCCTTTGGATATATCAAACAGACGATTTATCTCTTTGGATATGCTTCAATAGCCTATGCCAATGACCTACAATCAGATAACATTTGGACATCT  
GGAATTTGACAGTTTCGCGTTCAAGGTTTGTGATGATTTGCAAAGACCTACCTCACAGTTTTCAGAAGTTCCAAGCGTTCGGCTAGTAGGCAGTCTATAC  
ATCCTATCAGGCCCAAGGTATCAAGACGCAGGATTTCCAATCGATCCCAGAACATCCCTCAGACAAGCCAAGCTTTGATAGAAAACCTCTGAT  
TCAAAGCCCTCTCAGCTTGGTATCAATCGAAAAGAAATCGAGACTCTAAAGTCGCGCCTATGGATTTCTTTGTTGGAACACTCAGATGACTCTGCT  
GATAATGCGGGCGATTCTGAAGAGGAGAACGAAAACGGGTCACTCTCAAACCCGATACTTTAACTAAGATCTTAAAGACTGTTTGGCCCATGCTGA  
ACAAGAAGGAACGCACAATCCTTTTCGGTTGCATTTGGCGCAGCATTTATTTGTGGCAGTATCAACCCAGCTTTTGTCTATAATATATACCAAAC  
TCTTGACACTTTTACAAAAGGAGAACCGCAACTCGAATGCTTTAAAATGGTCACTTGTCTTACTCGGAATCGCCATCATTTGATGGCATATCT  
TGTTTCTTTTCGCATTTATGCTTTGGAACGTGCTGGACAAGCTTGGGTTAGTGTCTGCGTGTAGAAGCACTAAAGAAGATTTCTCGCACAAACCGA  
AGTCATGGTTTGGAGGAATCCAGGAATTCACCTGGCCGGTTGAACGAAGTTTGGATAGGAACCTGAGGAAATGCGTAATCTCGTTGGCCGCTT  
TGCTGGTATTGTATTACAGCATTTTTTATGCTATTGATATCAATCATTTGGGCTTTCGTGAATACATGGAAACTGACATTTAGTCTCAATGGCG  
ACTGGGCCAGTTATATACGCTGTACCAAAAACGTTCAATCGCGTGTAGTGGAAAATGGGAAAACAAGTGAACACTACGCATCTGAAATGACCACCTG

GCATATTTTCAGAGACTTTCTCCAACATCAAAGTGGTTCGGGCTTTTACTCTGGAACTTACTTTGAGACAAAACACACCAAAGCTACAGAAGA  
ACTCTATAAAAATTGGACTAATACGAGCAACTACTCGGGATTGCTGTGGGGATTGACAGATGCGATGTCATTCTTCATCACTGCAACTATCTTT  
TATTATGCCACGGTTCTCATTACCAAGAGAGAGATCAGTATCGCGACTGCACTGCAGACTGTCAATCTTCTATTATTTGGTATTTCTAATAGTA  
CGAATATGCTGGCCATGATACCACAAATCAACTCTTCTCGCGTTACAGCTACGCATATGCTTGCATTAGCCAATCTCGATTTCATCTTCTCCCA  
CGAAAATAAAGGAGCCGAACGGCTTTTCGACAATCTTTCCAATCAAATTCACAGTCTCTCATTCACATATCCTACTCGTCCGAAAACGAACG  
ATATCATCCTTTTCTCTTCCCTGATTCTTAACCAACTGCACCTGTGCGACCCTCCGGCTCCGAAAATCTACAATAGCTGCTCTGCTCG  
TTGGTCTCTATCCGCCAGATACTTCAACACCTCCACCGTTGACATTCGAATCGTGTCTCCATAAGTAACGTGCACATTCGGTCTCTCCGGGCTTC  
TCTCTCACTCGTCCACAAATACCGATTCTATTTCCAGCTACCATTCTCCATAACATCATTTATGGTCTCCAGAATCTTCTCCTTGTGCTAGT  
CTTCCATCTGCTATTGCATCAGCAAAAGATGCTGGGATCCATGAATTTATCACATCGCTTCCACAAGGTTATGATACTATGGTAGGAGATGGAG  
GACAAGAGTTATCGGGAGGACAGGCCAGAGAATTGTGATATCGAGAGCACTGGTCAGAAAACCACTTTATTTGATATTAGATGAAGCGACGAG  
TGGATTAGATGGTGGTAGTGCAGAGGTGATAAGAGAGACTGTGCAGAAAGTTGAAGGAGAGAGAAGGAATGGCCACGCTGGTTGTTAGTCATACG  
GCTGAAATGATGAAGATAGCGGGACGAGTCTGGTGTGATGGAAGAGGGAGAGATAGTTGAGAGTGGTGGTTTCGATGAGTTGAAGAATAAAGTTG  
AGGGGAAATTCAGGACTTTAGTTAGAGATGATTCCGGGGATAAAGTGGTGTGAAGGAAGAGAATGATGCTGGAGAGGCTAGTAGTAACGCTAG  
TAGCGATGCTCATAAAGGTGGGTTGGGTATTAGAATTCCTGGTTACGATGAGGTAGAATTCACATCTGGAAGAGACACGCCAATTCGAGATGCA  
AGAAGGAGAGATACTTGGCTGCGGCAAAACAATCATTTGA

>Bcin05g07690 (MLST2), partial sequence [organism=Botrytis cinerea, strain D08\_H\_8\_4]  
ATGATTTTCGTTCTCAACACAGATCAATCCACGACCGGTATATCTTTGCTACTGCTGTGCTTATTTCTGCGCACTATCTTTCTCAATTGGCGTAG  
ATGGGAGGCCCAACGATGTTGTGCGACAGAATGATTTGATTCACGACCACTTACGAATAATGAAGATATCACAATCAATGGGAGCCCTCAGGA  
GCTCATCAAGCCTGGAGACTCAAAGGTTCTACCGCAATGTTAAGCGCGTGGACGTGTACAAGAAGACTACTTTGCGACATGGCAAGGCATC  
TATCCAACAGGAATCGATTGGACATCTGCAGTGAATGGTACAATACTTTCTTTGATGTTGAAACCACTTTAGAGCAAGAGCTAACACCACCTCT  
CTAAACAGGCACCTATGTTGCTGGTGCACCTCACCCTATCACCAGTCCCTTTCTGCACTTTCTCATCAAAAACGAACGAGAATCATCAAT  
AAATACTTTGCTGAAGTAATGGGTTTTATTTTGGCCAGGATGCCTTCTCTACGACAGCAAGCCTTCGATGATATGTTGTGGGTAGTTCTTG  
GCTGGCTGGATACTGTCAAATTCATTGATTTACATTTCTGAATTCACACTATTCAAACGACTCTCAGCCAGAATGGTACGGACAACAATATAAACC  
TGCATTTGCACATCGAGCGGCACTATTTTGGGAATTTGGCTTCACAAGGATGGGATACTACTCTCTGTGGTGGTGGGATGATATGGTACCATA  
CTTACTCCATACAAGAACGCAATTTACCAATGAACTCTATATCGCAGCTTCGATATCGATGTACCTATATTTCCCGGAGATGACAATCAATCCC  
CATTTATGATTTCCAACCCCTTCATATCCACCTCAGATCCGAAATATCTACAGGCAGTGTGATGCTTACAAATGGCTGAATGGTTCACACAT  
GACGGATTACAAGGATTATATGTGACGGGTACCATATCTCGAATCTTTCTGGCGGTGAAAACACCCATTCGGATTCAGAAAATGAGATGGTA  
TATACTACAATCAAGGTGTTTTGCTTACTGGACAACGTGGTTTTGTATGACGCAACCGCCGACGATCATACTTGTAGATGGCCACAACTCA  
TCGCGAATGTTATTAATGCCACAGGCTATGACCTGAAACACAATGTTGTCACTCACCGCCACCCAAAGATGGTTCGCAATGGCAAAGTGGTT  
TGGCCTGGGTAGGAATGGAATACTGGAAGAAGGATGCGATTCAGTGTTCGTGTTCTCAAAATGGACAACTTTCAAAGGCATATCTTTTCAT  
CACTTGATTGCGTTCTGTAGTGATTTGCCAGGGGAGCCTATTGCAGGGACGAAGGAAAGCTTAGAACTCGACAGAGTGTGGCATTCGACAAAT  
GCTCACAGTATACAAAATGGATCAGGCGAAAATGCCGAAAGCTGCGTTAAGTACCAAGAAATGAAGAAGGGAAATTTGGTATGTTGGTGGGGTGTACC  
GGCTACACAGAGTCTTTAGCGGACTATACACAGGACCAGACATCGAGAGGCTCTGTAGATTATCGAAATACTGGAGTTCCAAAGAACACCGAA  
TGGAGAGGAGAAGAATACCCAGAGAAGTGAAGCGAGCAAGACTAAAGAAGGTGCAGATGTATATAGTGGGTAGAAGATCCCAATGATCGAG  
GTAGAGGAAGAACGGTAGAAAATCAGGGTGGAGGATTTGTCTGCTTGTGAGAGCATTTGTGGGAGGTAGAGCTGAGATAA

>Bcin06g01710 (MLST3), partial sequence [organism=Botrytis cinerea, strain D08\_H\_8\_4]  
ATGGATTGCAAGCAGTTTAGAGAGGGCGGACGTCGGCGATTGACGAAAAGTAAGTTCTTGCTTCCCAAGATGAAGTACTGTATACTGACCAACA  
TAGTCATCCAATATTATGATAATATTCATGAACGAAGAGTAATTTCAAATGTGCGAGCCTGGTTACCTGAAGAAGATTCCTCCAGATGGTCCACC  
GGAAGAGGGTGAATCATGGGCAGAGATCCAGAAAAGATATCGAATCTAAAATATGCTTGGTCTGACACATTTGGTGAAGTCTGACTTTTGTATTTG  
AGCGTTAAGATAGACACTGATATACCAAGGCAATCACCTAATTTTCATGGCGTCTTCCCTGCATCATCTACCTACCCTGGAATGCTGGGAGAAT  
TATACTCAGCAGCTTTACAGCTCCTGCTTTCAATTTGGATCTGTTCCCTGCCGTGACAGAAATGGAGACGGTTGTAATGGATTGGCTGGSCAA  
GCTTCTCAATCTCCAGACTGTTATTTGCTTTCGACTCATGGTGGTGGTGTATCCAAGGATCAGCCTCGGAAGCTATCGTTACCCTTATGGTT  
GCTGCCCGGATAAAATATCTTTCGTGAACTACTGAAGGTCTGTGCGGCATTGAACTCGAGGATGCGATTGCATATAAGAGGAGTAAGCTAGTTG  
CACTAGGAAGCGAAATGGCACACAGCTCCACGCAGAAAGCAGCGCAGATAGCTGGCGTTAGATTCCGATCGATTCCAGTACTCGCATCCAATGA  
TTTTCGCCATGACGGGTGATGATTTAGAGAAGGTATTGGAAGAATGCAAAATCTCAAGGATTGGAACCCCTCTATCTAACTTCGACTTTGGGAACA  
ACATCTACATGCGCAGTTGACGACTTCGCATCTATTGCAACAGTACTTTCAAATAATGCACCTCCAGATGTTGCAGGCGAGATCTGGGTTACG  
TCGATGCTGCTTATGCAGGTGCAGCTTTGGTTTGCCTGAATACCATCATCTAACATCGTCTTCCAGCATTTCCATTCTTCGATATGAACAT  
GCACAAATGGCTTCTGACAAATTTGACGCTTCTTGTCTATATGTCAAGAAACGCAAAGATCTGATCGATGCACCTCCATAACACCAAGTTAT  
CTTTCGCAACGAGTTTTTCAGAGAGTGGACTCGTAACCGACTATCGGGACTGGCAAATTCCTCTCGGAAGACGCTTCCGAAGCTTAAAGATTTGGT  
TTGTCTCAGAACCTACGGAGTCAAGGGCTACAAGAGCACATCCGAAAGCACGTGAAGCTCGGAGAATTACTTGTGAGCCTGCTCAAGACAG  
AGAAGATCTATTCAATATAGTTACAGGGCCCAATTTCCGCTCACTGTTCTGAACATTTGTTCCCAAATCCACAAATGCGGATGCACAGAATAGT  
CTCACGAAAGAAGTCTACGAGCTGATTAACAAAAGAAAGCGAAAATCTATCTCACAGCTGGCGTGGTGGCGGGTGCATATGTAATCCGAGTCGTGA  
GTGCGAATCCCAAGGCGGAAGAAAAGTTATATCCGCAAAGCTTTTGATATCCTAGTTGATACGACTGAAGAGGTCCGGGATGGGAAAGCGAGCAA  
GCGGGGAAATCTCAAAGGGTGTATTGAAATGGGAAGCGGAGGTTGGGTGAAGTCGCTGTTGTTAATGGGAATGGATTGCCAAATCAGAGC  
TAG

>Bcin09g03030 (MLST4), partial sequence [organism=Botrytis cinerea, strain D08\_H\_8\_4]  
ATGGCTCSCCTCAATCCCACAACGAAATCAGAAGCCCCCTCCGCTCTTCAGGCCTCCTGCTACCCCCGCTACAAATTCGAATCCTATCCCCCTCAT  
CATCGCCTGCATTTGCAACTCCGGTACATCCTATACGACCCTTCAACCCCCACCGCAGCTCCTATACCGAAAGCGAGTATCCTACCAATTCCTCT  
TCCACCTGCGACTTTAAGACCATTGGCTTTCCGCACTTTCACAAAAAGCATAGTTTAAACATTGACGTCGTCGGCATTACAAGTGTGGCTACT  
TTTATTGAAAGCATTGTGGACAGGATGGAGGGAAGAAGGACTGGCAGAGAGTCTTGGAGGAGGTCGCCAAGAGTTGGAAGAATAGGAGTG  
GCGGTGTCATTGTGCGAGGGCGAGGGAACGGAATTGAAGGAGATTCTGAAAGCTTTGGAAGGGAATATGAGTGGTGAAGGATAGTCATAGGAAG  
AGAGCTAAGCCGGCAGAATAGTTTAGTACTGGGATCATCACAATATGGAGAGGTCAATCATAACAAGACTTGGGCTACGGCCAGGGAATATACCC  
AGAGAGGATAGTCAGTCAAGTTTGGGAATGTCAACGTTGGAGGTCAATGACGAGGAGGATGAGGATGGCCTGATGGATCCAAGAAGGTGGTTAA  
AAGTCATTGATGCATTTGAGCAACCTCGACTGGTGTACAATGTTGCTAAAAAGCACTTTGATAGGTATGTTTCAATGATAAAAATTTTATCTGAA  
TCTACTAACTCAGTACAGAGATACCTCCAAACCTTCATTGTTCCACCTGCGTCTCATAAAAACACTCCTCTTCCAAAACCGCTATAATGTTATC  
CATCAACGTCCTTCCGAATGAATCTTTTCAAACGCCCGCTTTTCAAGGTGGCAAATCTTCCCTTCAACGCAGCAGCTCCGCCATTACCACCC  
AACAAACATCATACAAATTAACGCCGATAGCTAATCTTCTCGGTGCAATCGCAGCTCTCATATGCTTCTCGGTCTCCTCAGTATTTACCCAC  
TGGTACCCTCGCCATCAATGACCTGACGGGCGAGTATCGCTCTCGATCTTACACACGCAGCAGCCATTCGCCAAGATAGCGCCTGGTTTGCCCT  
GGGATGATGGTACTCGTAGACGGCAGTACGAGGAAAGTGAAGTGGGACGTCATCTCGTCTTGGTGGAAATGGGGCGTAGGGGGTACTATTT  
CTGGAAAATTTGTCGGCTTCTTCATCGGCCACCTCCCCCGAACGCCGTCATGTGACTTTAGGCACAGCCGGTGAGGGAGATACCACAGCCGG  
CGGTGGTTTCGGCTGGGTAGACTTCTTAGGCGTGGGTAGTTCTCGCGCCCTAGGCAACAAAATGCAACGACTGGAACAAAAGCTTCTCCGACCC  
CCTCCCCCTGACACAGATACAGATGATCCCCCGCTCCATCCAGAGCCGTGTAGTCAATCTTGGTGTATGTACATCTCGACATTTCTCAAACCT  
TTCAAGCCCTCAAAAAGATTCTCTCTTATACTCATCTGAACCAGAAGGCTGCACACCTATGACCTTTATCTCTCTCGGCTCTTTCGTCTCTCA  
TGCCGTACTGGCTCGGGGCGGATCGGGAGGCTCTATAGAATATAAAGATATTTTGTATCCCTTGCAGCCGTTCTCTCTGAATACCTACCATC  
TTAAGTACAGCAACATTCATATTTATCCCTGGCCCCAACGATGCATGGGTTTACGCTTCTCATCCGGGTCTACTGTTCCCTCTGCCAGAAAAC  
CCGTACCAGAAAATGTTACATCCCGCATAAAAACGTGCCCTTTGCAAAACGCAAAACACTGAAATGGAGAAAAGAAAACGGTAATAAAGGAGATGGAGA  
GGCCATTTGGACGAGTAATCCTGCAAGAGTCAGTTTATTTGGCATGAGCTGTGAACTGGTAGTATTCGCGACGACGTTAGCGGACGATTGCGT  
CGTACAGCTGTTACTCAAGTCATCTCAAACGTCGAACCTGAAAACGAAGATGAAGATATAGATATGTCACCACCTCCATCTTCAATTCCT  
CTTCCACCCCTCCTCCAGAAAATCGATCCCGATATCCACACCGCGCGTCTTACCAGGACACTCCTCGATCAGGGACACCTTTACCCCTTTCC  
TCTAAACATCGCACCCAGCATTGGGATTTCTCAAATGCGTTGAGCATTTATCCATTGCCAACAGCAATTGTTATGTGCGATGTAGATAGCCCG  
GCATTTTGTCTGACGTACGAGGGGTGTCATGTAATGAATCCAGCGAGTGTAGTAGCAAAGGGGAGAAGAGGCGTAGCGAGATGGATAGAGTATG  
ATGTTTGGGGACGGCTGGGAAGGTGAGAGAGGTGGGATTTTAG

>Bcin11g01310 (MLST5), partial sequence [organism=Botrytis cinerea, strain D08\_H\_8\_4]  
ATGCCTTCCATTAGCAGCATTCTAGTCGCCACTGTCAATTTGTCGGTCTTGTGAATGGGCTGACATGGACCTCATGTGGAACCGGCGTAGAAT  
GCGCAACGCTTGAAGTTCCGCTCGAATATGGCGATGCAACGTC AACGGCAAAAGCCAGTGTTCGCTTGCCTGTTATCCTGCCACTGTTGCCG  
GAGCAAGAAGCTCGGGTCTCTTTGATAAAACCCCGTGGACCCGGTGCCTCTGGTGTGGCTTTGTGTCAGTCTGGAGCCGGTGCCGCCGCTCG  
ACACTGAGTGGTGGATTGTACGATATCATCGGATGGGATCCACGTGGAACCGGTGCTTCCGCTCCTATTTTGGAAATGTTTGGCAAATGCCAGTG  
CGGAGTATGATTTTAAACAACGCTTTCCATCTGCTCCGAATCTCTGGCTCGGACAAATTTGCGAATGCCAGCGCAAATTTCTGCTGTTAGCTCTGC  
TATCACATCCTTTGACACTTCTGTGCTGCTTTCGAAAAGCTTGGCTGGCTCAGAAAATCTCCCGCTCTTTACACCTCAACAGCAGCATATGTT  
GCTCGAGACATGGCAGCGATAGTCGATGCATTGGATGGGACCTCTGCAAAACTTAACTACTGGGGTTTCTCATATGGAACATCTTCCCTAGCTG  
AGTTTATCCAAACTTTCCAGCCGCGTGGGAAGAGTTCTTGGCGATGGTGTTCGACGCAAAGGCAAATGCACTCACATACGTTAGCCAAC  
TCCCAACGATCAACTCAGTGTTCGTGCTTTCGTTGAACGATTTTTCGAGCTTCTTCGACCACCGCCGGTAGTAAAGGTTGCTCTTTTGCACCGCC  
CCTACTGGAACCTCAGGTACTGTTGCTACCAGACTGGACAACATAATGAAGGATATGTTCCCTCAATCCTATTGTTGCTTCGGGCTTAAGCATCA  
GCTTAGATATCCTCAGTCCCCTTCTTGCATCTCTTCTCAGAGTTCCAACCACGTGGAAAACGCTTGCATCTGTCTTATCCGGTCTTGAACCTCG  
TGACGCAACTGCTCTTATTTACTCCTTGGATCGCTAGCAGCAGTGCACCAACCGATGGCTCTGCAGCAGGCGTTGGCACTCTTGTACTTAC  
CCACTTGGTGTGTGGATAACGCTGCTTCAAATGGAGTTACCTTGGACACTGTCAATTTCTCTCACCAAAAGCATCTCAATCTCCGAAGACACCC  
CAATACTAAAATGCTGGACTTATCCCCATAACATTTTGTGCGCAACTTCCCTTCCACGCGTCCGCTTGTTCCAAACGTAGGAGTAAGTTTGTATGTC  
GAAGACCGATACTCTTCTCGCAACAGCCAAAACACCAATCCTCATTTGCTCGGCCGAGAATGATCCAACAACCCCTCTCAAGTCTGCAAAAGCA  
CTCCGAAGCCTCCTCCCTAGTTTATCCACCTCGTATACCGCGGAGGAAGCGGACACACCACCATCTCACACGCATCTCTCGGAATGGCAAAAG  
CGATCTCCAATTTCTTTGTCAGCGGTACCATGCCACGGACGGAGCTCGATTTGCAAGTGGACCAGAATATTTTCCCAACAGCTGCAGCGAGTGG  
TTTAGTTACACCAGCTGCTTTCAACGGAACTTATTTCTACACAAGATCAAAGTTTCTGACCGCAACATACAACATTGGCATTGCCCTTCTTAGCA  
ATCGCATAA

>Bcin15g03910 (MLST6), partial sequence [organism=Botrytis cinerea, strain D08\_H\_8\_4]  
ATGGCGCCATTACCAAAATTTATCTCGTTGCTCAGCAGCGCATCGCTCATCAACGCTATCGTTATGCCTGAGAGTGTCTTGAATTTCCCGTCCG  
CGCATGATGAACATGCCTCTGTCTACGATAAAAACAGTCTCTTCCAAGTATTTTCAACCTCACCTTGTCCGAAAGACTCGCCAAAACACAAA  
ATCATCCAACGATGAAGATGATACTCCACTTCCCTTGATTTATCTGGCATGGACTCGGCCGATAATTACAAAAGCGGATGGTCTTGCAGCAAGTTGGA  
AAACTAGCTGAAGCTATTTCATCCTGGGACTTTTGTCTACAATATTCATGTAGATGAGGATGCATCTGCAGATAGGACAGCTACCTTCTTTGGAA  
ATCTCACTCGTGAGTACATCCCTATTTTCTTTAAATATCATACTAATCTCTTACCAAGTTCAAATCGAAAAGGCTGCGAAGACCTCGCC  
TCCCATCCTATTCTCTTACCGCGCCCGCTCGACGCAATTTGGATTCTCCAAGCGGCCAATTTCTGCGTGGTTACATATCCCGCTGCAATG

```
CTCCACCCATCCGCTCTCTCCTGACCTTTGGTTCCCAACACAACGGCATTTCCTGCTTCCAAGCCTGTGGTCTCGCCGATTTCCCTCTGTGCGG  
TGCTCAAACCCCTTTTGGGATCCAACACCTGGTCAACCTTTGTCCAATCTCGTCTCGTACCCGCTCAATACTTCAGAGATCCGAAAACCTAGAC  
TCTTACCTTGAATATTTCAATTTCCCTTGCCGACATCAATAATGAGCGCGTTCTCAAGAACCAAACATATAAAATCCAACATGGAAAAATTTGGAAC  
GATTCGTAATGTATGTCTTTGAAGACGACACAACCTGTCATTCCTAAGGAAAAGTGGATGGTGGGGCTGAAGTCAACGGCAGGAAAGTTACACCCT  
GAAAGAAAAGACCCATTTATAAAGAAGATTGGCTAGGTTTAAAGACATTGGATGAGGCCGAAAAATTAGTTTTTCGAAACCATTTCCAGGGGGACAT  
ATGACGTTAGGAGAGGAGATGCTAGAGAAGGCTTTCAAAGAGTATTTTGGTCCAGCAGGGAAGAAATTTGGGGAGAAGCAAGCCCAGATGACGG  
GACACGAGGAGGAGTTGTAA
```

```
>Bcin16g03460 (MLST7), partial sequence [organism=Botrytis cinerea, strain D08_H_8_4]  
ATGCTTATTTACGCTTTTCGATGATACTCTTTACGCTCTAGTATGGGTGCCTCTTTCTCAAGTAATCTACGGTCGTAATCTGCTCTTCATG  
AACCTCTTGATTTGAACTCTTCATTAATTGCAAGTATGAACCCCTATTTCTGCCAGAGGATAGTTACAAGACGTATATCATTAGTTCGAGAACC  
ACTCATGATATATATTGACGGATTTTTGAAAGCGAATGAAAGTAAACATTTGGTTGATGTTAGGTGTGTTATTCATTTCTGATGAAATGAACAAG  
AGAGACTGATGAGATAGTGAACCGCTTTATGAACCATCTACTGTTTCTCACGGACAGGAAGTTACCATTGATCCTTCAGTTCCGAAATTTCTGAAG  
TGGCGGTTTTAGAGAGGGATGAGGTGGTCAAGTGTATTGAGCATAGAGCGAGGGCATTTCAGGGGTGGAGGGGCGAGATGGGGATTGAGAAGTT  
GAGGACGCAGAGGTATGGGGTTGGAGGACATTATGGGATGCATTTGTAAGTTTTGGGGGATTGACGAAGGCTTTTTGTCTATTTTTCTACCAGTAC  
GGATCTTGAAAGAAAGATAGCATGAACACGAGGGCTAATAACTAGGAAATAGCGATTGGAGCGGAGGTAAACGTGGCATAGACCGATTTAGTAC  
TTTCATGGTCTATGTGACGATCCTCTGATATCGAAGGTGGAGGAACGGAAATCCACGTAATGTGGGACCAAAGGAGGAAGGTGGGAGGAC  
TTCTTGAAACTACGGAAGCATTGGATCCAAGAACTGGAGAAAAATGTAACAGTAGAAGGGGTGACATTTCAAACCAATCAAGGAAAATGCCGTAT  
TCTGGGAAAATACTGACAACAACGGGAGGGCTATGATGAAACATGGCAGCTGGTCTACCCGTTGGAAAAAGGCTCGAAAGTAGGGTTGAATAT  
TTGGAGTTATGGGAGGACCATTAGATGA
```

```
>Bcin12g03020 (MLST8), partial sequence [organism=Botrytis cinerea, strain D08_H_8_4]  
AGCACGAATAAACCATCGGCAAGGGAAAATATTTCTCTGAACCCACAACATGACACGAGCGCGGAAGAGTATATCGGGCGAGAAGCTTCATCAAGAG  
CACCAAAGCGACAACGAGTCGATGATAATTATAACTCTTACGGTGGAAAGAAATGAAAATACAGCAGCTTATGCTTCCGGGAAACTTCCATCTGG  
AAGTATAAATGTTGGTGGAGGTAGGAAGACCCTTTTCAAGAAGAACCCTCGAACGGCATTGTGCTGGCAAGTTGCCCCCTGGAAGTATCAAC  
ATTTGGTGGAAAGAAGGCTACCCAAATCGAGGACGAGGGTAGAGCAGCTTATGCTTCCGGAAAATTTGCCCCAGGAAGTATAAACTCTGGCGCAA  
AGAAGGCGATTTCAATTCGAAGATGAAACGAGACCGGCTTATGTCTCCGAAAAGCTTCCACATGGTAGTATCGACGGTATGCGAAACCGTGAAT  
GGCTGCCGTCACCCGCAAAATTTGCTGAGGGTGGGAGGAAACCAGGCCAGGTTGTCTCTTCTATTTACATTTCAATCCTACTTCAAAGAAAAC  
TTTCGATGAACCAGAAGAACAAGCGGAACCGGCAAAAACCATCCAATGCGCCTTTGACAGAGGAAATGGCGACTTTTACCAATCTAGGGCTATCGA  
GAAGGCTTGCAGCCATCTATCGACTAAACTCGATATGAAAGCCCCGACGGCCATTCAAAAGCATCTGTGCAGCAGTTGGTATCGGACGATAG  
CGATGCTTTCATACAAGCAGAGACTGGATCTGAAAAAATTTGGCATATCTACTACCTATAGTCGAGCGAATATAGCATTGAGTGAGATGCTAA  
TCGCG
```

```
>Bcin02g07770 (MLST9), partial sequence [organism=Botrytis cinerea, strain D08_H_8_4]  
ATGGTTGCCTTCTCAAAATCATTACAGCTTTCCCTTTTCGGTCTTGGCATCTACAGTCAATGCCATCCCTACACCCTCACAACCTGAGTCTCGGG  
CCGTTATCGATTCCGATGCCGTTGTAGGATTTGCCGAAACTGTTCCAGTGGGACCGTAGGAACAGTTTATGAGGCATATAAAACCATTTCTTAA  
AGTCGTAATGGATGCGTACCATTCCCTGCCGTCGATGCATCGGGTAACACAGGGTATGTCTTATACCTTTCTCTTCCACACGATTGCTATTG  
AGTCTCTAATATATTTTAGTGGTGGTTTGTACCAACTGGCAGCAGCAATGGTGAATGCAGCAGCAGTACCAGTCAAGTATATGTTTCGAGGAGG  
ACAAAGCGGATCAAACCTACGCTATCATGTAATGTTTAACTTCTCCTTATAGATCCAACCTAACAAAATCTTAGGTACATG  
CCAAAGGACGAGCCCTCAACCGGATTTGGTCAACCGTACGATTGGGAAGGTGTAATTTGCTGGCTCTCCAGCGCCACCAGCCACAACCTGCCGACA  
ACATCTTAGCCGTTTGTCTTCCGCCCACGGAGGCTGGGATGTTCCACGGATGGCTATTTCCCTTTCTGGTACCAGCCCTCTTATCAAGTACGA  
AAGTATCTGGCCGTCGATCACTCAATGGGTCTTACTAGTACTGTTGGTGGAAAACAACCTATGATTGCTTGGGAGTCTTTACCAACTGCTGCT  
CAAACCTGCTCTTGAGAACACCGATTTCCGGTCTGCGAATGTTCCATTCATTCGGCTGTTTTTACAGATAATCTTGGCAAGGCTACTTTCTAG
```

```
>Bcin04g02090 (MLST10), partial sequence [organism=Botrytis cinerea, strain D08_H_8_4]  
AATTGTCGAATATGACTATGAATGATGTTTACAAGCCCTACATCCATGTAAGAAATGTAGAATAAAGAGATCAGTAACTGGAACATAATATCGTT  
TGCAGGCTTTCAAGTTACTTACGCAGTTCAACCCAACTACTACAGCTATTTGCCGAATCCCCACTATTTCAAATGGCTGCTCAGCAAATACCAT  
CGAAAAGTACACACTGCTAGGCCCTTTCTTTCAGAATATCTCCTCTGCAACAGGAAGTTACCAGGGAATACTTCAGTGCGCCAAAGACGATAGAT  
AGGCGACACATTGCCACATCTCAAGATGCGTTACGATTGACCTTACAAACCCATCAAAAAGATTTACTTTGATATCATCAACCACCTTTGTTTCGAG  
CAAGTCCAATCGAAAAAGCAAAAACCTGGATTGGTTTCGCTTACATTTGTAATCAAAAACCAAGCGTCGAGCACTTCAGGTAGACCCGAAAGA  
AGTGTCTTCTGATGGCTTTATGCACAATGTCACTGTGCTTCTAGATGGTCTTTGTGAGCCATTCATGGATACCACATTTCTCAAAAATTTGGAAG  
ATTGATATTGATTATCTAAGACGTGCGCCTCGTGTAGATATCAAGGACGAGACCAAGTTGAACGCTGATGAGAAGGCTTCTGAGAAGTATTATG  
AGGACACTGTTCCCTGGCACTTCTAATTTCACTCTGAGGATTTCTTTCTGACATTTGGCTGCTCATCATTATG
```

```
>Bcin01g07220 (MLST1), partial sequence [organism=Botrytis cinerea, strain D08_H_6]  
ACGAAGTTTTGGATAGAACTCTGAGGAAATGCGTAATCTCGTTGGCCGCTTTGCTGGTATTGTATTACAGCATTTTTTTATGCTATTGATATC  
AATCATTGGGCTTTCTGTAATACATGGAACTGACATTAGTCTCAATGGCAACTGGGCCAGTTATATACGCTGTCACCAAACCGTTCAATCGC
```

GTGAGTGGAAAATGGGAAAACAAGTGCAACTACGCATCTGAAATGACCACTGGCATAATTTTCAGAGACTTTCTCCAACATCAAAGTGGTTCGGG  
CTTTTACTCTGGAACTTACTTTGAGACAAAACACACCAAAGCTACAGAAGAACTCTATAAAAGTTGGACTAATACGAGCAAACACTACTCGGGATT  
GCTGTGGGGATTGACAGATGCGATGTCATCTTTCATCACTGCAACTATCTTTTATTATGCCACGGTTCTCATTACCAAGAGAGAGATCAGTATT  
GCGACTGCACTACAGACTGTCAATCTTCTATTATTTGGTATTTCTAATAGTACGAAATATGCTGGCTATGATACCACAAATCAACTCTTCTCGCG  
TTACAGCTACGCATATGCTTGCATTAGCCAATCTCGATTATCTTCTCCACGAAAATAAAGGAACCGAACGGCTTTCGACAATCTTTCCAAT  
CAAATTC AACCGTCTTTCATTACATAACCTACTCGTCTGAAAAACGAACGATATCATCTTTTCTCTTTCCCTGATTCCTAACCAACAAC  
GCACTTGTTCGGACCTCCGGCTCCGGAAAATCTACGATAGCTGCTCTGCTCATTTGGTCTCTATCCGCCAGATACTTCAACACC

>Bcin05g07690 (MLST2), partial sequence [organism=Botrytis cinerea, strain D08\_H\_6]  
AGGATGCCTTCTCTACGACAGCAAGCCTTCGATGATATGTTGTGGGTAGTTCTTGGCTGGCTGGATACTGTCAAATTCATTGATTTACATTC  
TGAATTGCACTATTCAAACGACTCTCAGCCAGAAATGGTACGGACAACAATATAAACCTGCATTTGCACATCGAGCGGACTATTTTGGGAATTG  
GCTTCACAAGGATGGGATACTACTCTCTGTGGTGGTGGGATGATATGGTCACCATACCTTACTCCATACAAGAATGCAATTACCAATGAACCTCT  
ATATCGCAGCTTCGATATCGATGTACCTCTATTTCCCGGAGATGACAATCAATCCCATTATGCTTTCCAACCTTCATATCCACCTCACGA  
TCCGAAATATCTACAGGCAGCTGTTGATGCTTACAAATGGCTGAATGGTTCCAACATGACGGATTTACAAGGATTATATGTCGACGGGTATCAT  
ATCTCGAATCTTTCTGGCGGTGAAAAACCCATTGCGATTCTAGAAATGAGATGGTATATACCTACAATCAAGGTGTTTTGCTTACTGGACAAC  
GTGGTTTGTATGACGCAACCGCCGACGATCATACCTTGTGGATGGCCACAACTCATCGCAATGTTATTAATGCCACAGGCTATGACCTGAA  
ACACAATGTTGCCATCTCACCGCCACCCAAAGATGGTTCGCAATGGCAAAGTGGTTTGGCTGGGTAGGAATGGAATACTGGAAGAAGGATGC  
GATTCAAGTGCTTCGTGTTCTCAAAAATGGACAAAATTTCAAAGGCATATTTCTTTCACCACCTTGATTGCGTTCGTAGTGTATTGCCAGGGGAGC  
CTATTGCAGGGACGAAGGAA

>Bcin06g01710 (MLST3), partial sequence [organism=Botrytis cinerea, strain D08\_H\_6]  
CAAGGCAATCACCTAATTTTCATGGCGTTCTTCCCTGCATCATCTACCTACCCTGGAATGCTGGGAGAATTATACTCAGCAGCTTTCACAGCTCC  
TGCTTTCAATTGGATCTGTTCCCTGCTGTGACAGAATTGGAGACGGTTGTAATGGATTGGTTGGCCAAGCTTCTCAATCTCCAGACTGTTAT  
TTGTCGTCGACTCATGGTGGTGGTGTATCCAAGGATCAGCCTCGGAAGCTATCGTTACCCTTATGGTTGCTGCCCGGATAAGTATCTTCGTG  
AAACCACTGAAGGTCTGTTCGGGAATGAACTCGAGGATGCGATTGCATATAAGAGGAGTAAGCTAGTTGCAC TAGGAAGCGAAATGGCACACAG  
CTCCACGCAGAAAAGCAGCGCAGATAGCTGGCGTTAGATTCCGATCGATTCCAGTACTCGCATCCAATGATTTTCGCCATGACGGGTGATGATTTA  
GAGAAGGTATTGAAAGAATGCAAACTCAAGGATTGGAACCTTCTATCTAACTTCGACGTTGGGAACAACATCTACATGCGCAGTTGACGACT  
TCGCATCTATTGCAACAGTACTTTCAAAAATATGCACCTCCAGATGTTGCAGGCGAGATCTGGGTTACGTCGATGCTGCTTATGCAGGTGCAGC  
TTTGGTTTGCCTGAATACCATCATCTAACATCGTCTTCCAGCATTTCCATTCCTTTGATATGAACATGCACAAAATGGCTTCTGACAAAATTC  
GACGCTTCTTGCTTATATGTCAAGAAAACGAAAAGATCTGATCGATGCACTCTCCATAACACCAAGTTATCTTCGCAACGAGTTTTTCAGAGAGTA  
GACTCGTAACCGACTATCGGGACTGGCAAAATCTCTCGGAAGACGTTTCCGAAGCT

>Bcin09g03030 (MLST4), partial sequence [organism=Botrytis cinerea, strain D08\_H\_6]  
GCAGAGAGAGTCTTGGAGGAGTTCGCAAGAGTTGGAAGAATAGGAGTGGCGGTGTCATTTGTCGAGGGCGAGGGAACGGAATTGAAGGAGATTC  
TGAAAGCTTTGGAAGGGAATATGAGTGGTGAAGGATAGTCATAGGAAGAGCTAAGCCGGCAGAATAGTTTAGTACTGGGATCATCACAATA  
TGGAGAGGTCAATCATAACAAGACTTGGGCTACGGCCAGGGAATATACCCAGAGAGGATAGTCAGTCAAGTTTGGGAATGTCAACGTTGGAGGTC  
AATGACGAGGAAGATGAGGATGGCCTGATGGATCCAAGAAGGTGGTTAAAAGTCGTTGATGCATTTGAGCAACCTCGACTGGTGTACAATGTTG  
CTAAAAGCACTTTGATAGGTATGTTTCAATGATAAAAATTTTATCTGAATCGACTAACTCAGTACAGAGATACCTCCAAACCTTCAATGTTCC  
ACCTGCGTCTCATAAAACACTCCTCTTCCAAAACCGCTATAATGTTATCCATCAACGCTCTCCTTCGCAATGAATCTTTTCAAACGCCCGCTTTT  
CAAGGTGGCAAAATCTTCCCTTCAACGCAGCACGTCCGCCATTACCACCCAACAACAATCATACAAAATTAACGCCGATAGCTAATCTTCTCGGTC  
GCAATCGCAGCTCTCATATGCTTCTCGGTCTCCTCAGTATTTACCCACTGGTACCCTCGCCATCAATGACCTG

>Bcin11g01310 (MLST5), partial sequence [organism=Botrytis cinerea, strain D08\_H\_6]  
TCATGTGGAACCGGCGTAGAATGCGCAACGCTTGAAGTTCCGCTCGAATATGGCGATGCAACGTCAACGGGCAAAGCCAGTGTTCGCTTGCT  
CGTTATCCTGCCACTGTTGCCGCGAGCAAGAAGCTCGGGTCTCTCTTGATAAAATCCCAGTGGACCCGGTGCCTCTGGTGTGGCTTTGTGCAGT  
CTGGAGCCGGTGCCGCGTCTCGACACTGAGTGGTGGATTATACGATATCATCGGATGGGATCCACGTGGAACCGGTGCTTCGGCTCCTATTTT  
GGAATGTTTTGCAAATGCCAGTGGGAGTATGATTTTAAACAACCGGTTTCCATCTGCTCCGAATCTCTGGCTCGGACAATTTGCGAATGCCAGC  
GCAAATTCGCTGTTAGCTCTGCTATCACATCCTTTGACACTTCTGTGCTGCTCTTGCAAAAGCTTGGCTGGCTCAGAAATCTCCCGCTCTTT  
ACACCTCAACAGCAGCATATGTTGCTCGAGACATGGCAGCGATAGTCGATGCATTTGGATGGGACCTCTGCAAAACTTAACACTGTTGGGTTTCTC  
ATATGGAACATCTTCTAGCTGAGTTTATCCAACTTTCCAGGCCGCTGGGAAGAGTTCTTGGCGATGGTGTTCGACGCAAAGGCAAAAT  
GCACTCACATACGTTAGCCAACCTTCCCAACGATCAACTCAGTGTTCGTGCTTCGTTGAACGATTTTGCAGCTTCTGCACCACCGCCGGTAGTA  
AAGGTTGCTCTTTTGCACCCGCCCTACTGGAACCTCAGGTACTGTTGCTACCAGACTGGACAACATAATGAAGGATATG

>Bcin15g03910 (MLST6), partial sequence [organism=Botrytis cinerea, strain D08\_H\_6]  
ATGATACTCCACTTCCCTTGATTATCTGGCATGGACTCGGCGATAATTACAAAGCGGATGGTCTTGGCGAAGTTGGAAAACCTAGCTGAAGCTAT  
TCATCCTGGGACTTTTGTCTATAATATTCATGTAGATGAGGATGCATCTGCAGATAGGACAGCTACCTTCTTTGGAAATCTCACCTCGTGAGTAC  
ATCCCTATTTTTCTTTAAATACCATACTAATCTCTTACCAAGTTCAAATCGAAAAGGTCTGCGAAGACCTCGCTCCCATCTTCTCTCT

TACCGCGCCCGCCGTCGACGCAATTGGATTCTCCCAAGGCGGCCAATTCTTGCGCGGTTACATATCCCGCTGCAATGCTCCACCCATCCGCTCT  
CTCCTGACCTTCGGTTCCTAACACAACGGCATTCTGCCTTCCAAGCTGTGGTCTGCCGATTTCTCTGTGCGGGTCTCAAACCCTTTTGC  
GATCCAACACCTGGTCAACCTTTGTCCAATCTCGTCTCGTACCTGCTCAATACTTACAGAGATCCGAAAACCTAGACTCTTACCTTGAATATTC  
CAATTTCTTGGCGACATCAATAATGAGCGCGTTCTCAAGAACCAACATATAAATCCAACATGGAAAAATTGGAACGATTCGTAATGTATGTC  
TTTGAAGACGATACAACCTGTCATCCCTAAGGAAAAGTGGATGGTGGGCTGAAGTCAATGGCACGGAAGTTACACCACCTGAAAGAAAGAGCCATTT  
ATAAAGAAGATTGGCTAGGGTTAAAGACATTGGGATGAGGCCGAAAAATTAGTTTTCGAAACCATTCCAGGGGGACATATGACGTTAGGAGAGG  
AGATGCTAGAGAAGGCTTTCAAAGA

>Bcin16g03460 (MLST7), partial sequence [organism=Botrytis cinerea, strain D08\_H\_6]  
TCTTCATGAACCTCTTAATTTGAACTCTTCATTAATTGCAAGTGATGAACCCCTATTCTGCCAGAGGATAGTTACAAGACGTATATCATTAGT  
CGAGAACCCTCATGATATACATTGACGGATTTTTGAAAAGCGAATGAAAGTAAACACTTGGTTGATGTTAGGTGTGTTATTTATTTCTGATGAAA  
TGAACAAGAGAGACTGATGAGATAGTGAACCGCTTTATGAACCGTCTACTGTTTTCTCACGGACAGGAAGTTACCATTGATCCTTCGGTTCGAAA  
TTCTGAAGTGGCGATTTTAGAGAGGGATGAGGTGGTCAAGTGTATTGAGCATAGAGCGAGGGCATTTCAGGGGTGGAGGGGCGAGATGGGGATT  
GAGAAGCTGAGGACGCAGAGGTATGGGGTTGGAGGACATTATGGGATGCATTTGTAAGTTTTGGGGGATTGACGAAGGCCCTGTCTATTTTTCT  
ATCAGTACGGATCTTGAAGAAAAGATAGCATGAACACGAGGGCTAATAACTAGGAAATAGCGATTGGAGCGGAGGTAAACGTGGCATAGACCGA  
TTTAGTACTTTTCATGGTCTATGTGACGATCCTCTGATATCGAAGGTGGAGGAACGGAATCCCACGTATTGTGGGACCAAAGGAGGAAGGT  
GGGAGGACTTCTGAAACTACGGAAGCATTTGGATCCAAGAACTGGAGAAAAATGTAACAGTAGAAGGGGTGACATTTCAAACCAATCAAGGGAAA  
TGCCGTATTCT

>Bcin12g03020 (MLST8), partial sequence [organism=Botrytis cinerea, strain D08\_H\_6]  
ACTGCGCAGCACCGAGTCACCAAAAGCACGAATAAACCATCGGCAAGGGAAAATATTCTCTGAACCACAACATGACACGAGCGCGGAAGAGTATA  
TCGGGGCAGAAAGCTTCATCAAGAGCACCAAAAGCGACAACGAGTCGATGATAAATTATAACTCTTACGGTGGAAAGAAATGAGAATACAGCAGCTTA  
TGCTTCCGGGAAACTTCCATCTGGAAGTATAAATGTTGGTGGAGGTAGGAAGACCACATTTCAAGAAGAACCCTCGAACGGCATTGTCGCTGGC  
AAGTTGCCCCCTGGAAGTATCAACATTTGGTGGAAAGAGGCTACCCAAATCGAGGACGAGGGTAGAGCAGCTTATGCTTCCGAAAATTTGCCCC  
CAGGAAGTATAAACTCTGGCGCAAAGAGGCGATTTCAATCCAAGATGAAACGAGACCGGCTTATGCTCTGGAAGCTTCCACATGGTAGTAT  
CGACGGTATGCGAAAACCGTGAATGGCTGCCGTCCACCAGGAAAATGCTGAGGGTGGGAGGAAACCAGGCCAGGTTGTCTCTTCTCTATTACACA  
TTCAATCCTACTTCAAAGAAAACCTTTCGATGAACCCGAAGAACAAGCGGAACCGGCAAACCATCCAATGCACCTTTGACAGAGGAAATGGCGA  
CTTTACCAATCTAGGGTTATCGAGAAGGCTTGCAGCTTATCTATCGACTAACTCGATATGAAAGCCCCGACCGCTATTCAAAGACATCTGT  
GCAGCAGTTGGTATCGGACGATAGCGATGCTTTCATACAAAGCAGAGACTGGATCTGGAAAAACTTTGGCATATCTACTACCTATAGTCGAGCGA  
ATATTAGCATTGAGTGAGAATGGCGT

>Bcin04g02090 (MLST10), partial sequence [organism=Botrytis cinerea, strain D08\_H\_6]  
AACTGTGCAATATGACTATGAATGATGTTTACAAGCCCTACATCCATGTAAGAAATGTAGAAATAGAGAGATCAGTAACTGGAACATAATATCGTT  
TGTAGGCTTTCAAGTTACTTACGCAGTTCAACCCAATCACTACAGCTATTGCCGAATCCCCTACTTTCAAATGGCTGTCTCAGCAAATACCAT  
CGAAAAGTACACACTGCTAGGCCCTTCTTTCAGAATATCTCTCTGCAACAGGAAGTTACCAGGAAATACCTCAGTGCGCCAAAGACGATAGAT  
AGACGACACATTGCCACATCTCAAGATGCGTTACGATTAACCTTACAAAACCCATCAAAAAGATTTACTTTGATATCATCAACCCTTTGTTTCGAG  
CAAGTCCAATCGCAAAAAGCAAAAACCTGGATTGGTTTCGCTTACATTTGTGAATCAAAAATCACAAACGTCGAGCACTTCAGGTAGACCCGAAAGA  
AGTGTCTTCTGATGGCTTTATGCACAATGTCCTGTCGTTCTAGATGGTCTTTGTGAGCCATTCATGGATACCACATTTCTCGAAAATTTGAAAG  
ATTGATATTGATTATCTAAGACGTGCGCCTCGTGTAGATATCAAGGACGAGACCAAGTTGAACGCTGATGAGAAGGCTTCTGAGAAGTATTATG  
AGGACACTGTTCTTGGCACTTCTAATTTTCATCTCTGAGGTCTTCTTTCTGACATTGG

>Bcin01g07220 (MLST1), partial sequence [organism=Botrytis cinerea, strain D09\_Bc11]  
ATGACAATATTGAAAAGCAAAGGCTCGAAGAGTCACAAAAAATACAGTCAATTCTACTTCTACCTCACGCATCCGATTGCCAGATGATGATCAGA  
ATTTCGTCCATCGAATTGCGAAAATATCAATGACTACCACGCCGATGAAGAAATCAAATCATCTTTCAAATCCCCTATTACATTCACAACAAAAA  
GCACATATCTACCATAGTTCCATGTATAGTATTTGCAATCATTAGCGCGGTTCTAAAACCTATATCGGCAATATTTTACGGAAATATCTTTGGT  
ACTCTTACAAAATTTGGGTCCGGTGTCTCACCGCACAAAGAGACCTTACAACATGTCTCGAAATGGTGATAGCTATAACTGTTCTTGGGGGCG  
CAGTATGGTTGTTTCGAAGGCTTGTCTGTGTTTCGTGGATGGTATTTGGAGAGCTCCAGGCTAGAAGCGTGCAGGAGAAAATGTTTGGCCGCAT  
GTTGGAGAAGGATTTGGAATGGTTTATGCTGCGTAGAGATGGCATTTGGATCATTATTAATTCGAATTGAAACGTTGTGGAATCCATTTATGGT  
CGAAATGAAAACATACTGATTGAACAATAGACAAATTCGAGAGCTCCAATTTACACATCCCAGCTCTTGGGTTTTCTCCTGTTTGGAGACTGCT  
AGCGCATGTGCAGCTCTTGGGACTGCCTTCTTTACTCTTGGAACTGACTCTTGTCAATTATAGCGACATTTCCAATTTCCGGTGGAAATACCTTT  
ATCTAATTTCTAGAAAACATGGGCCAGCCATCGAAGCCGAAAAAGAGAGCTATCGCAAGCTTCGAAATTTACAAAATACAGCCATTACAGCCAT  
CGATACTGTCAAAGCATTCAACGGACAGGACCAGGAAGTTTGGCAATACTTCTTAGTAATCAAAAAATCAACAGTTTATTACATGATCCAAGCC  
AGGTCAAATGCATTTCAATTTGGGATTACCAAATTTGTGATGGTGGCCATCTTTGTTCAAGGCTTTGGGTATGGTCTCACGTTAGTCGATCATG  
GACTAGATGCCGAAAAGGTTCTTACAACCTTCTATGCTTGTGTTGACTGGGATGATGGCTATAGAAGTCGTTTTACCACAATGGCTTGTCTTAGC  
AAAAGGAATGTCCGCTGGAGCGACTCTCAAGTCTATCATGAACCAAGTGGATAGAGGAGGAGTTGCAAAACACCCAGAAGGGTTAATGGTACCT  
AAAACCTGCAACGGTGATATAGAAGTCAATAATGTAAGTAGAGATGGCCACGATAAACCATCAAGACTAATCAAGATCAGGTTACATTTGGATA  
TCCTTCAAATCGACAGCACAAATGCTCTTATAAAAAACAACATTTCTTCTTCTGCTGGCGAGACTACTTTTTGTAGTTGGTAAAAGTGGTCTGGA

AAGAGTACATTGGGAAACTTGTGCTCAAAATTTTACGAGCCACAGGAGGGAAGTATCTTGATAGATGGCCAACGTATACAGGATCTCGATACCG  
ATTGGCTGAGACGCAACATCACTCTCGTACTGCAGCAGAGTGTGGTATTCACGAGACGGTTAGGAAAAACATAGAATTCGGCAAGGAAGGAAT  
AAAAAATGAAGCTGGTATCATAGACGCTGTTCTACAGCCAATCTAGAACAAGTAATTTGCCGATCTTCTGTATGGACTTGATACTATGATTTGGC  
TCTAAGGAGAGACAACCTGAGTGGTGGACAAAAACAACGTGTTGCATTGGCAGGAGCTAGATTACGAGATGCACCAATCTTGATTCTTGACGAAG  
GAACTAGTGTCTTGTATCTGACCAACCGACTCAAAATCATGGATAATATTCGAGAAATGGAGGAAAGGAAAAACGACAATTTATTTGTGACTCATGA  
TATTTCCAGATATTGGATGATGACTACGTTTACGTTATGGATCAGAGTAAGGTTGTCCAGGAAGGATATCGTAGGAAGCTTTCTGCGAAAGCA  
AACGGTACTTTTCGCTACATTTTCGCAACTCCCAGGATTGCCCGTTGAACAGTTCGACAGACTTGTCCAACATCAGAAGAACTCGGACCCCTGGAA  
CACCATTAACCTGGAAGCTTTGAAGACTTTGTTCAAGAATTGAAACCTCGTTTCTCTACCAAGTCTACAATCTATGGTCCAAATGCAGCAAATCG  
TAGGTCCCTGGATATATCAAACAGACGATTATCTCTTGGATATGCTTCAATAGCTTATGCCAATGACCTACAATCAGATAACATTTGGACATCT  
GGAATTGACAGTTCACGTTCAAGGTTTGATGATTTGCAAAGACCTACCTCACAGTTTCAGAAGTTCCAAGAGTCGGCTAGTAGGCAGTCTATAC  
ATCCTATCAGGCCACCAAGGTATCAAGACGCAGGATTCCAATCGATCCCAGAACATCCCCTCAGACAAGCCAAGCTTTGATAGAAAACCTCTGAT  
TCAAAGCCCTCTCAGCTTGGTATCAATCGAAAAGAATCGAGACTCTAAAGTCGCGCCTATGGATTCTTTGTTGGAACACTCAGATGACTCTGCT  
GATAATGCGGGCGATTCTGAAGAGAAGAACGAAACGGGTCATCTCAAACCGGATACTTTAACTAAGATCTTAAAGACTGTTTGGCCCATGCTGA  
ACAAGAAGGAACGCACAATCCTTTTCGGTTGCATTTGCCGCAGCATTTATTTGTGGCAGTATCAACCCCAGCTTTTGTATAATATATACCAAACCT  
TCTTGACACTTTTTTACCAAAAAGGAGAACCAGCAACTCGAATGCTTTAAAATGGTCACTTGTCTTACTCGGAATCGCCATCATTGATGGCATACT  
TGTTTCTTTTCGCATTATGCTTTGGAACGTGCTGGACAAGCTTGGGTTAGTGTCTGCGTGTAGAAGCACTAAAGAAGATTTCTCGCACAAACCGA  
AGCCATGGTTTGGGAATCCAGGAATTCACCTAGCCGGTTGAACGAAGTTTGGATAGGAACCTGAGGAAATGCGTAATCTCGTTGGCCGCTT  
TGCTGGTATTGTATTCACAGCATTTTTTATGCTATTGATATCAATCATTTGGGCTTTCGTGAATACATGGAAACTGACATTAGTCTCAATGGCA  
ACTGGGCCAGTTATATACGCTGTCAACAAAACGTTCAATCGCGTGAGTGGAAAATGGGAAAACAAGTGCAACTACGCATCTGAAATGACCACCTG  
GCATATTTTCAGAGACTTCTCCAACATCAAAGTGGTTCGGGCTTTTACTCTGAAAACCTACTTTAAGACAAAACACACCAAAGCTACAGAAGA  
ACTCTATAAAGTTGGACTAATACGAGCAAACCTACTCGGGATTGCTGTGGGATTGACAGATGCAATGTCATTTCTCATCACTGCAACTATCTTT  
TATTATGCCACGGTTCTCATTACCAAGAGAGAGATCAGTATCGCGGCTGCACTACAGACTGTCAATCTTCTATTATTTGGTATTTCTAATAGTA  
CGAATATGCTGGCCATGATACCACAAATCAACTCTTCTCGCGTTACAGCTACGCATATGCTTGCATTAGCCAATCTCGATTATCTTCTCCCA  
CGAAAATAAAGGAACCGAACGGCTTTTCGACAATCTTTCCAATCAAATTCACCGTCTTTTCAATTCACATACCCCTACTCGTCCGAAAACGAACG  
ATATCATCCTTTTCTCTTTCCCTGATTTCTAACTCAACAACCTGCATTTGTCGGACCCCTCCGGCTCCGGAAAATCTACAATAGCTGCTCTGCTCA  
TTGGTCTCTATCCGCCAGATACTTCAACACCTCCACCGTTGACATTTCAATCGCGTCTCCATAAGTAACTGTCACATTCGGTCTCTCCGGGCTTC  
TCTCTCACTCGTTCCACAAAATACCGATTCTATTTCCAGCTACCATTCTCCATAACATCATTTATGGTCTCCAGAATCTTCTCCTTGTGCTAGT  
CTTCCATCTGCTATTGCATCAGCAAAAGATGCTGGGATCCATGAATTTATCACATCGCTTCCACAAGGTTATGATACTATGGTAGGAGATGGAG  
GACAAGAGTTATCGGGAGGACAGGCCAGAGAATTTGTGATATCGAGAGCACTGGTCAAGAAAACCAACTTTATTTGATATTTAGATGAAGCGACGAG  
TGGATTAGATGGTGGTAGTGACAGAGGTGATAAGAGAGACTGTGCAGAAGTTGAAGGAGAGAGAAGGAATGGCCACGCTGGTTGTTAGTCATACG  
GCTGAAATGATGAAGATAGCGGGACGAGTCTGTTGATGGAAGAGGGAGAGATAGTTGAGAGTGGTGGTTTCGATGAGTTGAAGAATAAAGTCG  
AGGGGAAAATTCAGGACTTTAGTTAGAGATGATTCGGGTGATAAAGTGGTGTGAAGGAAGAGAATGATGCTGGAGAGGCTAGTAGTAACGCTAG  
CAGCGATGCTCACAAAAGGTGGGTTGGGTATTAGAATTCCTGGTTACGATGAGGTAGAATTCACATACTGGAAGAGACACGCCGATTCGAGATGCA  
AGAAGGAGAGATACTTGCTGCGGCAAAAACAATCATTGA

>Bcin05g07690 (MLST2), partial sequence [organism=Botrytis cinerea, strain D09\_Bc11]

ATGATTTTCGTTCTCAACACAGATCAATCCACGACCGGTATATCTTTGCTACTGCTGTGCTTATTTCTGCGCACTATCTTTCTCAATTGGCGTAG  
ATGGGAGGCCCAACGATGTTGTGCGACAGAATGATTTGATTCACGACCACTTACGAATAATGAAGATATCACAATCAATGGGAGCCCTCAGGA  
GCTCATCAAGCCTGGAGACTCAAAGGTTCTACCGCAATGTTAAGCGCGCTGGACGTGCTACAAGAAGACTACTTTGCGACATGGCAAGGCATC  
TATCCAACAGGAATCGATTGGACATCTGCAGTATTGGTACAATACTTTCTTTGCAATGTTGAAACCACTTTAGAGCAAGAGCTAACCCACTCT  
CTAAACAGGCACCTATGTTGCTGGTGCCTCACCCTATCACCAGTCCCTTTCTGCACTTTCTCTCATCAAAAACGAACGAGAATCATCAAT  
AAATACTTTGCTGAAGTAATTTGGGTTTATTTTGGCCAGGATGCCTTCTCTACGACAGCAAGCCTTCGATGATATGTTGTGGGTAGTTCTTG  
GCTGGCTGGATACTGTCAAATTCATTGATTTACATTTCTGAATTCGACTATTCAAACGACTCTCAGCCAGAATGGTACGGACAACAATATAAACC  
TGCATTTGCACATCGAGCGGACTATTTTGGGAATTGGCTTCACAAGGATGGGATACTACTCTCTGTGGTGGTGGGATGATATGGTACCATAAC  
CTTACTCCATAACAAGAACGCAATTTACCAATGAACTCTATATCGCAGCTTCGATATCGATGTACCTATATTTCCCGGAGATGACAATCAATCCC  
CATTTATGCTTTCCAACCTTCATATCCACCTCACGATCCGAAATATCTACAGGCAGCTGTTGATGCTTACAAAATGGCTGAATGGTTCCAACAT  
GACGGATTTACAAGGATTATATGTCGACGGGTACCATATCTCGAATCTTTCTGGCGGTGAAAACACCCATTCGGATTCAGAAAATGAGATGGTA  
TATACCTACAATCAAGGTGTTTTGCTTACTGGACAACGTGGTTTTGTATGACGCAACCGCCGACGATCATACCTTGTAGATGGCCACAACTCA  
TCGCGAATGTTATTAATGCCACAGGCTATGACCTGAAACACAATGTTGTCTATCTCACCGCCACCCAAAGATGGTTCCGCATTTGGCAAAGTGGTT  
TGGCCTGGGTAGGAATGGAATACTGGAAGAAGGATGCGATTCAAGTGTCTCGTGTCTCAAAAATGGACAAACTTTCAAAGGCATATTTCTTTTCA  
CACTTGATTGCGTTCTGTAGTATTGTTGCCAGGGGAGCCTATTGCAGGGACGAAGGAAAGCTTAGAACTCGACAGAGTGTGGCATTTCTGACAAAT  
GCTCACAGTATACAAAATGGATCAGGCGAAATGCCGAAGCTGCGTTAAGTACCAAGAATGAAGAAGGGAAATTTGGTATGTTGGTGGGGTGTACC  
GGCTACACAGAGTCTTTAGCGGACTATACACAGGACCAGACATCGAGAGGCTCTGTAGATTATCGAAAATCTGGAGTTCCAAAGAACACCGAA  
TGGAGAGGAGAAGAATACCCAGAGAAAGCGAAAAGCGAGCAAGACTAAAAGAAGGTGCAGATGTATATAGTGGGGTAGAAGATCCCAATGATCGAG  
GTAGAGGAAGAACGGTAGAAAATCAGGGTGGAGGATTGTCTGTCTTGAGAGCATTATGGGAGGTAGAGCTGAGATGA

>Bcin06g01710 (MLST3), partial sequence [organism=Botrytis cinerea, strain D09\_Bc11]



ATGGATTTCGAAGCAGTTTATAGGGAGGCGGCGACGTCGGCGATTGACGAAAGTAAGTTCTCTGCCAAGATGAAGTACTGTATACTGACCAGCA  
TAGTCATCCAATATTATGATAACATTCATGAACGAAGAGTAATTTCAAATGTCGAGCCTGGTTACCTGAAGAAGATTCTTCCAGATGGTCCACC  
GGAAGAGGGTGAATCATGGGCAGAGATCCAGAAAAGATATCGAATCTAAAAATTATGCCCTGGTCTGACACATTTGGTGAAGTCTGACTTTTGTATTTG  
AGCGTTAAGATAGACACTGATATACCAAGGCAATCACCTAATTTTCATGGCGTTCTTCCCTGCATCATCTACCTACCCTGGAATGCTGGGAGAAT  
TATACTCAGCAGCTTTACACGACCTGCTTTCAATTGGATCTGTTCCCTGCTGTGACAGAAATGGAGACGGTTGTAATGGATTGGCTGGCCAA  
GCTTCTCAATCTCCAGACTGTTATTTGTCTTCGACTCATGGTGGTGGTGTCTATCCAAGGATCAGCCTCGGAAGCTATCGTTACCGTTATGGTT  
GCTGCCCGGATAAAATATCTTCGTGAAACTACTGAAAGTCTGTGCGGCATTGAACTCGAGGATGCGATTGCATATAAGAGGAGTAAGCTAGTTG  
CACTAGGAAGCGAAATGGCACACAGCTCCACGCGAGAAAGCAGCGCAAATAGCTGGCGTTAGATTCCGATCGATTCCAGTACTCGCATCCAATGA  
TTTCGCCATGACGGGTGATGATTTAGAGAAGGTATTGAAAGAATGCAAATCTCAAGGATTGGAACCTTCTATCTAACTTCGACTTTGGGAACA  
ACATCTACATGCGCAGTTGACGACTTCGCATCTATTGCAACAGTACTTTCAAATATGCACCTCCAGATGTTGCAGGCGAGATCTGGGTTACAG  
TCGATGCTGCTTATGCAGGTGCAGCTTTGGTTTGGCCCTGAATACCATCATCTAACATCGTCCCTCCAGCATTTCCATTCTTTCGATATGAACAT  
GCACAAATGGCTTCTGACAAATTTTCGACGCTTCTTGTCTATATGTCAGAAACGCAAAGATCTGATCGATGCACCTCTCCATAACACCAAGTTAT  
CTTCGCAACGAGTTTTCAGAGAGTGGACTCGTAACCGACTATCGGGACTGGCAAATTCCTCTCGGAAGACGCTTCCGAAGCTTAAAGATTTGGT  
TTGTCTCAGAACCACGAGTCAAGGGCTACAAGAGCACATCCGAAAGCACGTGAAGCTCGGAGAATTACTTGTGAGCCTGCTCAAGACAG  
AGAAGATCTATTCAATATAGTTACAGGGCCCAATTTTCGCCCTCACTGTTCTGAACATTTGTTCCCAAATCCACAAATGCGGATGCACAGAATAGT  
CTCACGAAAGAAGTCTACGAGCTGATTAACAAACGAAGCGAAATCTATCTCACAGCTGGCGTGGTGGCGGGTGCATATGTAATCCGAGTCGTGA  
GTGCGAATCCCAAGGCGGAAGAAAGTTATATCCGCAAAGCTTTTGATATCCTAGTTGATACGACTGAAGAGGTCGGGATGGGAAAGCGAGCAA  
GCGGGGAAATCTCAAAGGGGTTGTATGAATAGGAAGGCGGAGGGTGTGGGTGAAGTCGCTGTTGTTAATGGGAATGGATTACCAAATCAGAGC  
TAG

>Bcin09g03030 (MLST4), partial sequence [organism=Botrytis cinerea, strain D09\_Bc11]

ATGGCTCSCCYCMATCCCACAACGAAATCAAAAAGCCCCCTCCGCTCTTCAGGCCTCCTGCTACCCCCGCTACAAATTCGAATCCTATCCCCCAT  
CATCGCCTGCATTTGCAACTCCGGTACATCCTATACGACCCTTCAACCCACCGCAGCTCCTATACCGAAAGCGAGTATCCTACCAATTTCTCCT  
TCCACCTGCGACTTTAAGACCATTGGCTTTCCGCACTTTCACAAAAAGCATAGTTTAAACATTGACGTCGTCGGCATTACAAGTGTGGCTACT  
TTTATTGGAAAGCATTTGTGGGACAGGATGGAGGGAAGAAAGGACTGGCAGAGAGAGTCTTGGAGGAGGTCGCCAAGAGTTGGAAGAATAGGAGTG  
GCGGTGTCATTTGTCGAGGGCGAGGGAACGGAATTTGAAGGAGATTTCTGAAAGCTTTGGAAGGGAATATGAGTGGTGAAGGATAGTCATAGGAAG  
AGAGCTAAGCCGGCAGAATAGTTTAGTACTGGGATCATACAATATGGAGAGGTCAATCATAACAAGACTTGGGCTACGGCCAGGGAATATACCC  
AGAGAGGATAGTCAGTCAAGTTTGGGAATGTCAACGTTGGAGGTCAATGACGAGGAAGATGAGGATGGCCTGATGGATCCAAGAAGGTGGTTAA  
AAGTCATTGATGCATTTGAGCAACCTCGACTGGTGTACAATGTTGCTAAAAAGCACTTTGATAGGTATGTTTCAATGATAAAATTTTCATCTGAA  
TCGACTAACTCAGTACAGAGATACCTCCAAACCTTCATTTGTTCCACCTGCGTCTCATAAAAACACTCCTCTTCCAAAACCGCTATAATGTTATC  
CATCAACGTCCTTCGCAATGAATCTTTTCAAACGCCCGCTTTTCAAGGTGGCAAATCTTCCCTTCAACGCAGCACGTCGCCATTACCACCC  
AACAACAATCATACAAATTAACGCCGATAGCTAATCTTCTCGGTTCGCAATCGCAGCTCTCATATGCTTCTCGGTCTCCTCAGTATTTACCCAC  
TGGTACCCTCGCCATCAATGACCTGACGGGCGAGTATCGCTCTCGATCTTACACACGCGCAGCCATTTCCGAAGATAGCGCCTGGTTTGGCCCT  
GGGATGATGGTACTCGTAGACGGCACGTACGAGGAAGATGAAACTGGGACGTCATCTCGTCTTGGTGGAAATGGGGGCGTAGGGGGTACTATTT  
CTGGAAAATTTGTGCGCTTCTTCATCGGCCACCTCCCCCGAACGCCGTCATGTGACTTTAGGCACAGCCGGTGGAGGAGATACCACAGCCGG  
CGGTGGTTTTCGGCTGGGTAGACTTCTTAGGCGTGGGTAGTTCTCGCGCCCTAGGCAACAAAATGCAACGACTGGAACAAAAGCTTCTCCGACCC  
CCTCCCCCTGACACAGATACAGATGATCCCCCGCTCCATCCAGAGCCGTGTAGTCAATCTTGGTGTATGTACATCTCGACATTTCTCAAACCT  
TTCAAGCCCTCAAAAAGATTTCTCTCTTATACTCATCTGAACCAGAAGGCTGCACACCTATGACCTTTATCCTCCTCGGCTCTTTCTGCTCTCA  
TGCCGTAATGGCTCGGGGCGGATCGGGAGGCTCTATAGAATATAAAGAGTATTTTGAATCCCTTGCAGCCGTTCTCTCTGAATACCCATACCATC  
TTAAGTACAGCAACATTCATATTTATCCCTGGCCCCAACGATGCATGGGTTTTCAGCCTTCTCATCCGGGTCTACTGTTCTCTGCCCAGAAAAC  
CCGTACCAGGAAATGTTACATCCCGCATAAAAACGTGCCCTTTGCAAACGCAAACACTGAAATGGAGAAAGAACACGGTAATAAAGGAGATGGAGA  
GGCATTGAGCAGTAATCCTGCAAGAGTCAAGTTATTTGGCATGAGCTGTGAACTGGTAGTATCCGCGACGACGTTAGCGGACGATTGCGT  
CGTACAGCTGTTACTCAAGTCACTCAAACGTCAAACCTGAAAACGAAGATGAAGATATAGATATGTCACCACCTCCATCTTCAATTTCCCT  
CTTCCACCCCTCCTCCAGAAAATCGATCCCGATATCCACACCGCGCGTCTTACCAGGACACTCCTCGATCAGGGACATCTTTACCCCTTTCC  
TCTAAACATCGCACCCAGCATTGGGATTTCTCAAATGCGTTGAGCATTTATCCATTGCCAACAGCAATGTTATGTGCGATGTAGATAGCCCG  
GCATTTTGTGCTGACGTACGAGGGGTGTCATGTAATGAATCCAGCGAGTGTAGTAGCAAAGGGGAGAAGAGGCGTAGCGAGATGGATAGAGTATG  
ATGTTTGGGGACGGGCTGGGAAGGTCAGAGAGGTGGGATTTTAG

>Bcin11g01310 (MLST5), partial sequence [organism=Botrytis cinerea, strain D09\_Bc11]

ATGCCTTCATTAGCAGCATTTAGTCGCCACTGTTAATTTGTGCGTCTTGTGAATGGACTGACATGGACCTCATGTGGAACCGGCGTAGAAT  
GCGCAACGCTTGAAGTTCCGCTCGAATATGGCGATGCAACGTCAACGGCAAAGCCAGTGTGCGCTTGTCTGTTATCCTGCCACTGTTGCCGC  
GAGCAAGAAGCTCGGGTCTCTCTTGATAAAACCCGGTGGACCCGGTGCCTCTGGTGTGGCTTTGTGAGTCTGGAGCCGGTGGCCCGTCTCG  
ACACTGAGTGGTGGATTGTACGATATCATCGGATGGGATCCACGTGGAACCGGTGCTTCGGCTCCTATTTTGGAAATGTTTTGCAAATGCCAGTG  
CGGAGTATGATTTTAAACAACGCTTTCCATCTGCTCCGAATCTCTGGCTCGGACAAATTTGCGAATGCCAGCGCAAATTTCTGCTGTTAGCTCTGC  
TATCACATCCTTTGACACTTCTGTGCTGCTTTCGAAAAGCTTGGCTGGCTCAGAAAATCTCCCGCTCTTTACACCTCAACAGCAGCATATGTT  
GCTCGAGACATGGCAGCGATAGTCGATGCATTTGGATGGGACCTTCGAAAACCTTAACACTGAGGGTCTTCTCATATGGAACATTTTTCTTAGCTG  
AGTTTATCAAACCTTTCCAGGCCGTGTGGGAAGAGTTCTTGGCGATGGTGTTCGACGCAAAGGCAAATGCACTCACATACGTTAGCCAAC

```
TCCCAACGATCAACTCAGTGTTCGTGCTTCGTTGAACGATTTTGCAGCTTCTGCACCACCGCCGGTAGTAAAGGTTGCTCTTTTGCCACCGCC  
CCTACTGGAACCTCAGGTACTGTTGCTACCAGACTGGACAACATAATGAAGGATATGTTCCCTCAATCCTATTGTTGCTTCGGGCTTAAGCATCA  
GCTTAGATATCCTCAGTCCCCTTCTTGCATCTCTTCTTAGAGTTCCAACCACGTGGAAAACGCTTGCATCTGTCTTATCCGGTCTTGAACCTCG  
TGACGCAACTGCTCTTATTTCACTCCTTGGATCGCTAGCAGCGAGTGCACCAACCGACGGCTCTGCAGCAGGCGTTGGCACTCTTGTACTTAC  
CCACTTGGTTGTGTTGATAACGCTGCTTCAAATGGAGTTACCTTGGACACTGTCAATTTCTCTCACCAAAAAGCATCTCAATCTCCGAAGACACCC  
CAATACTAAATGCTGGACTTATCCCATAACATTTTGTGCAACTTCCCTTCCACGCGTCCGCTTGTTCAAACGTAGGAGTAAGTTTGATGTC  
GAAGACCGATACTCTTCTCGCAACAGCCAAAACACCAATCCTCATTTGTCTCGGCCGAGAAATGATCCAACAACCCCTCTCAAGTCTGCAAAAGCA  
CTCCGAAGCCTACTCCCTAGTTTCACTCCACCCTCGTATACCAGCGGAGGAAAGCGGACACACCACCATCTCACACGCATCTCTCGGAATGGCAAAAG  
CGATCTCCAATTTCTTGTGTCAGCGGTACCATGCCAAGGACGGAGCTCGATTTGCAGTGGACCAGAATATTTTCCCAACAGCTGCAGCGAGTGG  
TTTAGTTACACCAGCTGCTTTCACGGAACTATTTCTACACAAGATCAAAGTTTCTTAAACCGCAACATAACAACATTTGGCATTTGCCTTCTTAGCA  
ATCGCATAA
```

```
>Bcin15g03910 (MLST6), partial sequence [organism=Botrytis cinerea, strain D09_Bc11]  
ATGGCGCCATTACCAAAATATCTCGTTCCTCAGCAGCGCATCGCTGATCAACGCTATCGTTATGCCTGAGAGTGTCTTGAATTTCCCGTCC  
CGCATGATGAACATGCCTCTGTCTACGATAAAAAACAGTCCCTTCCAAGTATTTTCAACCTCACCTTGTCCGAAAGACTCGCCAAAACACAAA  
ATCATCCAACGATGAAGATGATACTCCACTTCCCTTGATTATCTGGCATGGACTCGGCGATAATTACAAAGCGGATGGTCTTGCAGCAAGTTGGA  
AAACTAGCTGAAGCTATTCATCCTGGGACTTTTGTCTACAATATTCATGTAGATGAGGATGCATCTGCAGATAGGACAGCTACCTTCTTTGGAA  
ATCTCACTCGTGAGTACATCCCCTATTTTCTTTAAATATCATACTAACTCTCTTACCAAGTTCAAATCGAAAAGGCTGCGAAGACCTCGCC  
TCCCATCCTATTCTCTCTACCGCGCCCGCCGTCGACGCAATTGGATTCTCCCAAGGCGGCCAATTTCTTGCCTGGTTACATATCCCCTGCAATG  
CTCCACCCATCCGCTCTCTCCTGACCTTTCGGTTCCCAACACAACGGCATTCTGCTTCCAAGCCTGTGGTCTGCGGATTTCTCTGTGCGGG  
TGCTCAAACCTTTTGCAGTCCAACACCTGGTCAACCTTTGTCCAATCTCGTCTCGTACCCTCAATACTTTCAGAGATCCGAAACCTTAGAC  
TCTTACCTTGAATATTTCCAATTTCTTGGCCGACATCAATAATGAGCGCGTCTCAAGAACCAACATATAAATCCAACATGGAAAAATTTGGAAC  
GATTCGTAATGTATGTCTTTGAAGACGATACAACCTGTCATCCCTAAGGAAAGTGGATGGTGGGCTGAAGTCAACGGCACGGAAGTTACACCCT  
GAAAGAAAGAGCCATTTATAAAGAAGATTGGCTAGGTTTAAAGACATTTGGATGAGGCCGAAAAATTAGTTTTCGAAACCATTCAGGGGGACAT  
ATGACGTTAGGAGAGGAGATGCTAGAGAAGGCTTTCAAAGAGTATTTTGGTCCAGCAGGGAAGAAATTTGGGGAGAAGCAAGCCCAGATGACGG  
GACACGAGGAGGAGTTGTAA
```

```
>Bcin16g03460 (MLST7), partial sequence [organism=Botrytis cinerea, strain D09_Bc11]  
ATGCTTATTTACGCTTTCGCATTGATACCTCTTTACGTCTAGTATGGGTGCCTCTTTCTCAAGTAATCTACGGTCGTCAATCTGCTCTTCATG  
AACCTCTTGATTTGAACTCTTCATTAATTGCAAGTGATGAACCCCTATTTCTGCCAGAGGATAGTTACAAGACGTATATCATTAGTTCGAGAACC  
ACTCATGATATATATTGACGGATTTTGAAGCGAATGAAAGTAAACATTTGGTTGATGTTAGGTGTGTTATTTATTTCTGATGAAATGAACAAG  
AGAGACTGATGAGATAGTGAGCCGCTTATGAACCGTCAACTGTTTCTCACGGACAGGAAGTTACCATTGATCCTTCAGTTCGGAATTTCTGAAG  
TGGCGGTTTTAGAGAGGGATGAGGTGGTCAAGTGTATTGAGCATAGAGCGAGGGCATTTTCAGGGGTGGAGGGGCGAGATGGGGATTGAGAAGTT  
GAGGACGCAGAGGTATGGGGTTGAGGACATTTATGGGATGCATTTGTAAGTTTTGGGGGATTGACGAAGGCTTCTGTCTATTTTCTATCAGCAC  
GGATCTTGAAGAAAGATAGCATGAACACGCGGGCTAATAACTAGGAAATAGCGATTGGAGCGGAGGTAAACGTGGCATAGACCGATTTAGTAC  
TTTCATGGTCTATGTGACGATATCCTCTGATATCGAAGGTGGAGGAACGGAAATCCCACGTATCGTGGGACAAAAGGAGGAAGGTGGGAGGAC  
TTCTTGGAAACTACGGAAGCATTGGATCCAAGAACTGGAGAAAAATGTAACAGTAGAAGGGGTGACATTTCAAACCAATCAAGGGAATGCCGTAT  
TCTGGGAAAATACTGACAACAACGGGAGGGGCTATGATGAAACATGGCACGCTGGTCTACCGGTGGAAAAAGGCTCGAAAGTAGGGTTGAATAT  
TTGGAGTTATGGGAGGACCATTAGATGA
```

```
>Bcin12g03020 (MLST8), partial sequence [organism=Botrytis cinerea, strain D09_Bc11]  
ATGGCCGACGATGGAATGCTGATGAATTTTGAAGATTGGGGATGTACCTATTGTTGCGAAAACAAGCATTTAAAGGAGGACGTTGGAAGGATCGAT  
TGGCTGCGAAGAAAACCTGCGCAGCACCAGTCAACAAAAGCAGAAATAAACCATCGGCAAGGGAATATTTCTCTGAACCACAACATGACACGAG  
CGCGGAAGAGTATATCGGGCGAGAAGCTTCATCAAGAGCACCAAAGCGACAACGAGTTCGATGATAAATTATAACTCTTACGGTGGAAAGAAATGAA  
AATACAGCAGCTTATGCTTCCGGGAAACTTCCATCTGGAAGTATAAATGTTGGTGGAGGTAGGAAGACCCTTTTCAAGAAGAACCACGAACGG  
CATTTGTGCTGGCAAGTTGCCCTTGAAGTATCAACATTTGGTGGAAAGAAGGCTACCCAAATCGAGGACGAGGGTAGAGCAGCTTATGCTTC  
CGGAAAATTTGCTCCAGGAAGTATAAATCTTGGCGCAAAGAAGGCGATTTCAATCCAAGATGAAACGAGACCGGCTTATGCTCCGGAAAGCTT  
CCACATGGTAGTATCGACGGTATGCGAAACCGTGAATGGCTGCCGTCCACCGCGAAATTTGCTGAGGGTGGGAGGAAACCAGGCCAGGTTGTCT  
CTTCTCTATTCACATTCATCTCACTTCAAAGAAAACCTTTTGTGATGAACCCGAAGAACAAGCGGAACCGGCAAAACCATCCAATGCGCCTTTGAC  
AGAGGAAATGGCGACTTTACCAATCTAGGGTTATCGAGAAGGCTTGCAGCCATCTATCGACTAACTCGATATGAAAGCTCCGACCGCCATT  
CAAAAAGCATCTGTACAGCAGTTGGTATCGGACGATAGCGATGCTTTCATACAAGCAGAGACTGGATCTGGAAAAACTTTGGCATATCTACTAC  
CTATAGTCGAGCGAATATTAGCATTGAGTGAGAATGGCGTACAAATACATCGAGATTTCTGGACTTTTTGCGATTATTTCTTCCACTACAAGAGA  
ACTGTGCAAACAATCGCGGCTGTGCTGGAGAAAGTTTACGTTGTGCGCCATGGATTGTTGGTACGACCGTTAACGGAGGAGAGAGTAAGCAA  
TCAGAAAAGGCTAGACTTCGAAAGGGTGTCAATATTTCTTGTGCAACACCGGGTTCGATTAGCAGATCATCTCGATAACACAGAAGTGTGAATG  
TAGCTACTGTAAGATGGCTAGTGTGGATGAAGGAGATAGATTAATGGAGCTTGGGTTTCGAGGAAGAGATTAAGGATCGTTGAGAAGATAGG  
TCGAAGATCAGTGGCCAAAGCAATTCGGACATGGGGTCACTCCGAAACGAAGAGTTACTATCTTATGTTCTGCTACGATGAAGATGAATGTT  
CAGCGTTTTGGGAGAAATCAGTTTAAAGGATGCTGTGCACATTCAGCGGATCTTCCGAACAAGAGAAACAAGACAAGGAAATGGCGTTGAAG
```

```
CCCAAGATAAAGCTTTCTCCGCCCTTACGCAATTGAAGCAGTTCATATGCTATCGTTCTCCTGCGAAGCTCAGACTTGTACCTGACGGCTCTATT  
GAAACGTGCTTTTGACGAAAAGGGTCCGTGATGAAGGCGATCGTTTTCAATTTCTTGTGCTGACTCTGTTGACTTTCACTTCTCGCTCTTCTCT  
CGTACCCCAGAAGCTTCAGCCGAGGTTGTGGACGAGGAGAAAGGTTGATCTTCCCGCATTACCAAATCAGAAATGGTCAAAGAGACTATTGCGC  
ATGGAACACTACAATTTTCAATAATTTCAAAACCTGTAATTTCTACACAACTTTCACGGATCTCTTGCACAAAACATCAGAACAGCAACCTCAAGGC  
ATTTTCCGAATCTGCGGACCCTTGTGTTATGATATGTAAGTGTGATCTGATCTTCCAAATGTGACTTTGTGATCGAGTAT  
GACCCGCTTTTAGCGCGAAGATCATCTACATCGTGTGGTTCGAACAGCCAGAGCTGGTTCGCGAGGGTCTGCTTTGATCTTCTTATGCCTG  
GCGTCGAGGAGGAATATGTTTCTATCTTAGCATCCGGATACCGTGAAGGAAAAGAACTCTGACACGTCACTGCTGAGGATTTGATACAAAA  
GGGTTTCGGTGGTATAGGTTCGCAATGGGAAGAGAGACTACGAATTTCCAACTGAAAGTTGAACGATGGAGTTTGGACTCGCCAAAATATCTT  
GAGATGGCACGCCGTGGATAACCAGAGTCATATCAGGGCTTATGCCACTCACGTCGCAAATGAGAGACACATATTCAAATATGCAAGAATTGCACT  
TGGGTCAATTTGGCCAAAGCATTTGCCCTTGCAGACAAACCTGGAAGCATTAAGGTGCCAGGATTAAGACCAGCGAAGATGACCAAAGCAGATCG  
AAGTGTTCGCGGCTAGGAAGGCGAAGAGGGGTGAGAAAAGCAGAAAGATAAAGCTCCCGAGGGAGAAAGAGTGCAGGAAAACAAAAGAAGATGGAGCTG  
GACTTGCTACTGTGGATGGCAATGAAGCTGCCGCGAGGATGAAGAGGAAAGATGAAGGAGCATATGGCTGCTGCGAGCGAGTTCAAATATTTGGTT  
GA
```

```
>Bcin02g07770 (MLST9), partial sequence [organism=Botrytis cinerea, strain D09_Bc11]  
ATGGTTGCCTTCTCAAAATCATTACAGCTTTCCCTTTCGGTCTTGGCATCTACAGTCATTGCCATCCCTACACCATCACAACCTTGAGTCTCGGG  
CCGTATCGATTCCGATGCCGTGTAGGATTTGCCGAACTGTTCAGGTGGGACCCTAGGAACAGTTTATGAGGCATATAAACCATTCCCTTAA  
AGTCGTAATGGATGCCGTACCATTTCCCTGCCGTGCATCGGGAACACAGGGTATGTCCCTATATCTTTCTCTTCCACACGATGCTATTTG  
AGTCTCTAACATATTTTAGTGGTGGTTTGTACCAACTGGCAGTAGCAATGGTGGTTCGAGCAGCAGTACCAGTCAAGTATATGTTTCGAGGAGG  
ACAAAGCGGATCAAACCTACGCCATCATGTACTCTGTTAAGTTCTCTCTAACTTCTCCTTATAGATCCAACCTAACAAAATCTTAGGTACATG  
CCAAAGGACGAGCCCTCAACCGGTATTTGGTACCCTCACGATTGGGAAGGTGTAATTTGTCTGGCTCTCCAGCGCCACCGCCACAACCTGCCGACA  
ACATCTTAGCCGTTTGTCTTCCGCCACGAGGCTGGGATTTGTTCCACGGATGGCTATTTCCCTTCTGGTACCAGCCCTCTTATCAAGTACGA  
AAGTATCTGGCCGTCGATCACTCAATGGGTCTTACTAGTACTGTTGGTGGAAAACAACCTATGATTGCTTGGGAGTCTTTACCAACTGCTGCT  
CAAACCTGCTCTTGAGAACACCGATTTCCGGTGTGCAATGTTCCATTCATTCCGGCTGTTTTACAGACAATCTTGCAGGCTACTTTCTAG
```

```
>Bcin04g02090 (MLST10), partial sequence [organism=Botrytis cinerea, strain D09_Bc11]  
AACTGTGCAATATGACTATGAATGATGTTTACAAGCCCTACATCCATGTAAGAAATGTAGAATAGAGAGATCAGTAACTGGAACATAATATCGTT  
TGTAGGCTTTCAAGTACTTACGCAGTTCAACCCATCACTACAGCTATTGCCGAATCCCCTGTTTTCAAATGGCCGCTCTCAGCAAATACCAT  
CGAAAAGTACACTGCTAGGCCCTTCTCTCAGAAATATCTCCTCTGCAACAGGAAAGTTACCAGGGAATACCTCAGTGCGCCAAAGACGATAGAT  
AGGCGACACATTGCCACATCTCAAGATGCGTTACGATTGACCTTACAAACCCATCAAAGAATTACTTGTATATCAACCACCTTTGTTCGAG  
CAAGTCCAATCGCAAAAAGCAAAACCTGGATTGGTTCGCCTACATTGTGAATCAAATCACAAGCGTCGAGCACTTCAGGTAGACCCGAAAGA  
AGTGTCTTCTGATGGCTTTATGCACAATGTCCTGTCTGTGATGGTCTTTGTGAGCCATTCATGGATAACCACATTTCTCGAAAATTTGCAAG  
ATTGATATTGATTATCTAAGACGTGCGCCTCGTGTAGATATCAAGGACGAGACCAAGTTGAACGCTGACGAGAAGGCTTCTGAGAAGTATTATG  
AGGACACTGTTCTTGGCACTTCTAATTTTCATCTCTGAGGTCTTCTTCTCACATTGG
```

```
>Bcin01g07220 (MLST1), partial sequence [organism=Botrytis cinerea, strain D13_E_IL4]  
CAAGCTTGGGTTAGTGCTCTGCGTGTAGAAAGCACTAAAGAAGATTCTCGCACAAACCGAAGTCATGGTTTGGGAATCCAGGAATTCACCTGGCC  
GGTTGAACGAAGTTTTGGATAGGAACTCTGAGGAAATGCGTAATCTCGTTGGCCGCTTTGCTGGTATTGTATTACAGCATTTTTTATGCTATT  
GATATCAATCATTGGGCTTTCGTGAATACATGGAACTGACATTAGTCTCGATGGCAACTGGGCCAGTTATATACGCTGTCACCAAACGTTT  
AATCGCGTGGAGTGGAAAATGGGAAAACAAGTGAACCTACGCCCTCTGAAATGACCACTGGCATAATTTTCAGAGACTTTCTCCAACATCAAAGTGG  
TTCGGGCTTTTTACTCTGGAACTTACTTTGAGACAAAACACACCAAAGCTACAGAAGAATTTATAAAAGTTGGACTAATACGAGCAAACCTACTC  
GGGATTGCTGTGGGATTGACAGATGCGATGTCATTTCTCATCACTGCAACTATCTTTTTATTATGCCACGGTCTCATTACCAAGAGAGAGATC  
AGTATCGGACTGCACTACAGACTGTCAATCTTCTATATTTGGTATTTCTAATAGTACGAATATGCTGGCCATGATAACCACAAATCAACTCTT  
CTCGGTTACAGCTACGCATATGCTTGCATTAGCCAATCTCGATTTCATCTTCTCCTCCACGAAAATAAAGGAACCGAACGGCTTTTCGACAATCTT  
TCCAATCAAATTCACCGTCTCTCATTCACATACCCTACTCGTCTGAAAACGAACGATATCATCTTTTCTCTTTCCCTGATTCCTAACCTCA  
ACAACCTGCACTTGTGCGACCTCCGGCTCCGAAAATCTACAATAGCTGCTCTGCTCATTGGTCTCTATCCGCCAGATACTTCAACACC
```

```
>Bcin05g07690 (MLST2), partial sequence [organism=Botrytis cinerea, strain D13_E_IL4]  
TGGGTAGTTCTTGCTGGCTGGATACTGTCAAATTCATTGATTTACATTCTGAATTCAGTATTCAAACGACTCTCAGCCAGAATGGTACGGAC  
AACAATATAAACCTGCATTTGCACATCGAGCGGACTATTTTGGGAATTTGGCTTCACAAGGATGGGATACTACTCTCTGTGGTGGTGGGATGAT  
ATGGTCACCATACTTACTCCATACAAGAACGCAATTAACCAATGAACTCTATATCGCAGCTTCGATATCGATGTACCTATATTTCCCCGGAGAT  
GACAATCAATCCCCATTTATGATTTCCAACCCCTCATATCCACCTCACGATCCGAAATATCTACAGGCAGCTGTTGATGCTTACAAATGGCTGA  
ATGGTTCCAACATGACGGATTACAAGGATTATATGTCGACGGTACCATATCTCGAATCTTTCTGGCGGTGAAAACACCCATTGCGATTCTAG  
AAATGAGATGGTATATACTACAATCAAGGTGTTTTGCTTACTGGACAACGTGGTTTTGTATGACGCAACCGCCGACGATCATACTTTGTAGAT  
GGCCACAAACTCATCGCAATGTTATTAATGCCACAGGCTATGACCTGAAACACAATGTTGTATCTCACCGCCACCCAAAGATGGTTCCGCAT  
TGGCAAAGTGGTTTTGCCCTGGGTAGGAATGGAATACTGGAAGAAGGATGCGATTCAAGTGTCTCGTGTCTCAAATGGACAACTTTCAAAGG  
CATATTTCTTTCATCACTTGAATTGCGTTCTGTAGTGAATTTGCCAGGGGAGCTATTGCAAGGACGAAGGAA
```

>Bcin06g01710(MLST3), partial sequence [organism=Botrytis cinerea, strain D13\_E\_IL4]  
CAAGGCAATCACCTAATTTTCATGGCGTTCTTCCCTGCATCATCTACCTACCCCTGGAATGCTGGGAGAATTATACTCAGCAGCTCTCACAGCACC  
TGCTTTCAATTGGATCTGTTCCCTGCTGTGACAGAAATGGAGACGGTTGTAATGGATTGGCTGGCCAAGCTTCTCAATCTCCAGACTGTTAT  
TTGTCTTCGACTCATGGTGGTGGTGTATCCAAGGATCAGCCTCGAAGCTGTCGTTACCGTTATGGTTGCTGCCCGGATAAAATATCTTCGTG  
AAACTACTGAAGGTCTGTGGGATTTGAACTCGAGGATGCGATTGCATATAAAAAGGAGTAAGCTAGTTGCAC TAGGAAGCGAAATGGCACACAG  
TTCCACGCAGAAAAGCAGCGCAGATAGCTGGCGTTAGATTCCGATCGATTCCAGTACTCGCATCCAATGATTTTCGCCATGACGGGTGATGATTTA  
GAGAAGGTATTGAAAAGATGCAAAATCTCAGGGATTGGAACCCCTTCTATCTAACTTCGACTTTGGGAACAACATCTACATGCGCAGTTGACGACT  
TCGCATCTATTACAACAGTACTTTCAAAAATATGCACCTCCAGATGTTGCAGGCGAGATCTGGGTTACGTCGATGCTGTTATGCAGGTGCAGC  
TTTGGTTTGCCTGAATACCATCATCTAACATCGTCCTTCCAGCATTTCATTCCTTCGATATGAACATGCACAAAATGGCTTCTGACAAAATTC  
GACGCTTCTTGTCTATATGTCAAGAAAACGCAAAGATCTGATCGATGCACTATCCATAACACCAAGTTATCTTCGCAACGAGTTTTCAGAGAGTG  
GACTCGTAACCGACTATCGTGACTGGCAAAATTCCTCTCGGAAGACGCTTCCGAAGCT

>Bcin09g03030(MLST4), partial sequence [organism=Botrytis cinerea, strain D13\_E\_IL4]  
GCAGAGAGAGTCTTGGAGGAGGTCGCCAAGAGTTGGAAGAATAGGAGTGGCGGTGTCAATTGTGCGAGGGCGAGGGAACGGAATTGAAGGAGATTC  
TGAAAGCTTTGGAAGGAATATGAGTGGTGAAGGATAGTCATAGGAAGAGAGCTAAGCCGGCAAAAATAGTTTAGTACTGGGATCATCACAATA  
TGGAGAGATCAATCATAACAAGACTTGGGCTACGGCCAGGGAATATACCCAGAGAGGATAGTCAGTCAAGTTTGGGAATGTCAACGTTGGAGGTC  
AATGACGAGGAAGATGAGGATGGCCTGATGGATCCAAGAAGGTGGTTAAAAGTCATTGATGCATTTGAGCAACCTCGACTAGTGTACAATGTTG  
CTAAAAAGCACTTTGATAGGTATGTTTCAATGATAAAAATTTTATCTGAATCGACTAACTCAGTACAGAGATACCTCCAAACCTTCAATGTTCCC  
ACCTGCGTCTCATAAAAACACTCCTCTTCCAAAACCGCTATAATGTTATCCATCAACGTCCTCTTCGCAATGAATCTTTTCAAACGCCCGCTTTT  
CAAGGTGGCAAACTTCCCTTCAACGCAGCAGCTCCGCCATTACCACCAACAACAATCATACAAATTAACGCCGATAGCTAATCTTCTCGGTC  
GCAATCGCAGCTCTCATATGCTTCTCGGTCTCCTCAGTATTTACCCACTGGTACCCTCGCCATCAATGACCTG

>Bcin11g01310(MLST5), partial sequence [organism=Botrytis cinerea, strain D13\_E\_IL4]  
TCATGTGGAACCGGCGTAGAATGCGCAACGCTTGAAGTTCCGCTCGAATATGGCGATGCAACGTC AACGGCAAAAGCCAGTGTTCGCTTGCTC  
GTTATCCTGCCACTGTTGCCCGCAGCAAGAAGCTCGGGTCTCTCTTGATAAAACCCCGTGGACCCGGTGCCTCTGGTGTGGCTTTGTGCAGTC  
TGGAGCCGGTGCCGCCGCTCTCGACACTGAGTGGTGGATTGTACGATATCATCGATGGGATCCACGTGGAACCGGTGCTTCGGCTCCTATTTTG  
GAATGTTTTGCAAAATGCCAGTGCAGGATGATGATTTTAAACAACGCTTTCCATCTGCTCCGAATCTCTGGCTCGGACAATTTGCGAATGCCAGCG  
CAAAATCTGCTGTTAGCTCTGCTATCACATCCTTTGACACTTCTGTGCTGCTCTTGCAAAAGCTTGGCTGGCTCAGAAAATCTCCCGCTCTTTA  
CACCTCAACAGCAGCATATGTTGCTCGAGACATGGCAGCGATAGTCGATGCATTTGGATGGGACCTCTGCAAAACTTAACTACTGGGGTTTCTCA  
TATGGAATAATTTTCCCTAGCTGAGTTTATCCAACTTTCCAGGCCGCTGGGAAGAGTTCTTGCCGATGGTGTGTTTTCGACGCAAAGGCAAATG  
CACTCACATACGTTAGCCAATTTCCCAACGATCAACTCAGTGTTCGTGCTTCGTTGAACGATTTTGCAGCTTTCTGCAACCCGCGGTAGTAA  
AGGTTGCTCTTTTGCCACCGCCCTACTGGAACCTCAGGTACTGTTGCTACCAGACTGGACAACATAATGAAAGATATG

>Bcin15g03910(MLST6), partial sequence [organism=Botrytis cinerea, strain D13\_E\_IL4]  
ATGATACTCCACTTCCCTTGATTATCTGGCATGGACTCGGCGATAAATTACAAAGCGGATGGTCTTGCGCAAGTTGGAAAAC TAGCTGAAGCTAT  
TCATCCTGGGACTTTTGTCTACAATATTCATGTAGATGAGGATGCATCTGCAGATAGGACAGCTACCTTCTTTGGAAATCTCACTCGTGAGTAC  
ATTCCCTATTTTCCCTTAAATATCATACTAACTCTTTACCAAGTTCAAATCGAAAAGTCTGCGAAGACCTCGCTCCCATCCTATTTCTCTC  
TACCGCGCCCGCGCTGACGCAATTTGGATTTCTCCAAGGCGGCAATTTCTTGGCTGGTTACATATCCCCTGCAATGCTCCACCCATCCGCTCT  
CTCCTGACCTTCCGTTCCCAACACAACGGCATTCTGCTTCCAAGCCTGTGGTCTCGCCGATTTCTCTGTGCGGGTGCCTCAAACCTTTTGC  
GATCCAACACCTGGTCAACCTTTGTCCAATCTCGTCTCGTACCCGCTCAATACTTCAGAGATCCGAAAACCTAGACTCTTACCTTGAATATTC  
CAATTTCTTGGCGACATCAATAATGAGCGCTTCTCAAGAACCAAACATATAAATCCAACATGGAAAAATTTGGAACGATTCGTAATGTATGTC  
TTTGAAGACGACACAACCTGTCATCCCTAAGGAAAAGTGGATGGTGGGCTGAAGTCAACGGCACGGAAGTTACACCCTGAAAGAAAGAGCCATTT  
ATAAAGAAGATTGGCTAGGTTTAAAGACATTGGATGAGGCCGGAAAAATTAGTTTTCGAAACCATTCAGGGGACATATGACGTTAGGAGAGGAG  
ATGCTAGAGAAGGCTTTCAAGA

>Bcin16g03460(MLST7), partial sequence [organism=Botrytis cinerea, strain D13\_E\_IL4]  
TCTTCATGAACCTCTTAATTTGAACTCTTCATTATTTGCAAGTGATGAACCCCTATTTCTGCCAGAGGATAGTTACAAGACGTATATCATTAG  
TCGAGAACCCTCATGATATATATTGACGGATTTTGAAGCGAATGAAAGTAAACACTTGGTTGATGTTAGGTGTGTTATTTATTTCTGATGAA  
ATGAACAAGAGAGACTGATGAGATAGTGAACCGCTTTATGAACCGTCTACTGTTTCTCACGGGCAGGAAGTTACCATTGATACTTCAGTTTCGAA  
ATTTCTGAAGTGGCGGTTTTAGAGAGGGATGAGGTGGTCAAGGTGATTTGAGCATAGAGCGAGGGCATTTTCAGGGGTGGAGGGGCGAGATGGGGAT  
TGAGAAGTTGAGGACGCAGAGGTATGGGGTTGGAGGACATTATGGGATGCATTTGTAAGTTTGGGGGATTGACGAAGGCTTTTGTCTATTTTC  
TACCAGTACGGATCTTGAAAGAAAGATAGCATGAACACGAGGGCTAATAACTAGGAAATAGCGATTGGAGTGGAGGTAAACGTGGCATAGACCG  
ATTTAGTACTTTTCATGGTCTATGTCGACGTATCCTCTGATATCGAAGGTGGAGGAACGGAATTTCCACGTATCGTGGGACCAAAGGAGGAAGG  
TGGGAGGACTTCTGGAAAACCTACGGAAGCATTTGGATCCAAGAATCGGAGAAAATGTAACAGTAGAAGGGGTGACATTCAAACCAATCAAGGGAA  
ATGCCGTATTCT

>Bcin12g03020 (MLST8), partial sequence [organism=Botrytis cinerea, strain D13\_E\_IL4]  
ACTGCGCAGCACCGAGTCACCAAAAGCACGAATAAACCATCGGCAAGGAAATATTCTCTGAACCACAACATGACACGAGCGCGGAAGAGTATA  
TCGGGCGAGAAGCTTCATCAAGAGCACCAAAAGCGACAACGAGTCGATGATAATTATAACTCTTACGGTGGAAAGAAATGAAAATACAGCAGCTTA  
TGCTTCCGGGAAACTTCCATCTGGAAGTATAAAATGTTGGTGGAGGTAGGAAGACCCTTTTCAAGAAGAACCACGAACGGCATTGTGCTGCTGGC  
AAGTTGCCCCCTGGAAGTATCAACATTGGTGGAAAGAAGGCTACCCAAATCGAGGACGAGGGTAGAGCAGCTTATGCTTCCGGAAAATTGCCCTC  
CAGGAAGTATAAACTCTGGCGCAAAGAAGGCGATTTCAATCCAAAGTAAACGAGACCGGCTTATGCTTCCGGAAAGCTTCCACATGGTAGTAT  
CGACGGTATGCGAAAACCGTGAAATGGCTGCCGTCCACCGCGAAAATTGCTGAGGGTGGGAGGAAACCAGGCCAGGTTGTCTCTTCTCTATTACACA  
TTCAATCCTACTTCAAAGAAAACCTTTTGATGAACCCGAAGAACAAGCGGAACCGGCAAACCATCCAATGCGCCTTTGACAGAGGAAATGGCGA  
CTTTCACCAATCTAGGGTTATCGAGAAGGCTTGCAGCCCATCTATCGACTAACTCGATATGAAAGCTCCGACCGCCATTCAAAAAGCATCTGT  
ACAGCAGTTGGTATCGGACGATAGCGATGCTTTCATACAAGCAGAGACTGGATCTGGAAAAACCTTTGGCATATCTACTACCTATAGTCGAGCGA  
ATATTAGCATTGAGTGAGAATGGCGTACA

>Bcin02g07770 (MLST9), partial sequence [organism=Botrytis cinerea, strain D13\_E\_IL4]  
CGATTCCGATGCCGTTGTAGGATTTGCCGAAACTGTTCCAGTGGGACCGTAGGAACAGTTTATGAGGCATATAAACCATTCCTTAAAGTCGTA  
AATGGATGCGTACCATTCCCTGCCGTCGATGCATCGGGTAACACAGGGTATGTCCTTATACCATTCTCTTCCACACGATTGCTATTGAGTCTCT  
AACATATTTTAGTGGTGGTTTGTACCAACTGGCAGTAGCAATGGTGGTTGCAGCAGCAGTACCGGTCAAGTATATGTTGAGGAGGACAAAGC  
GGATCAAACACTACGCCATCATGTACTCCTGGTAAGTTCTCTCTAACTTCTCCTTATAGATCCAACCTAACAAAATCTTAGGTACATGCCAAAG  
ACGAGCCCTCAACCGGTATTGGTACCGTACGATTTGGGAAGGTGTAATTGTCTGGCTCTCAAGCGCCACCGCCACAACCTGCCGACAACATCTT  
AGCCGTTTGTCTTCCGCCACGGAGGCTGGGATTGTTCCACCGATGGATATTCCTTCTGTTACCAGCCCTCTTATCAAGTACGAAAGTATC  
TGGCCCGTCGATCATTC AATGGGTCTTACTAGTACTGTTGGTGGAAAACAACCTATGATTGCTTGGGAGTCTTTACCAACTGCTGCTCAAACCTG  
CTCTTGAGAACACCGATTTCGGTGCTGCGAATGTTCCATTCAATCCGGCTGTTTTTACAGATAATCTTGGGAAGGCTACTTTCTAG

>Bcin04g02090 (MLST10), partial sequence [organism=Botrytis cinerea, strain D13\_E\_IL4]  
AACTGTCGAATATGACTATGAATGATGTTTACAAGCCCTACATCCATGTAAGAAATGTAGAATAGAGAGATCAGTAACTGGAACATAATATCGTT  
TGTAGGCTTTCAAGTTACTTACGCAGTTCAACCCAATCACTACAGCTATTGCCGAATCCCCACTATTTCAAATGGCTGTCTCAGCAAATACCAT  
CGAAAAGTACACACTGCTAGGCCCTTTCTTTCAGAAATATCTCCTCTGCAACAGGAAGTTACCAGGGAATACTTCAGTGCGCCAAAGACGATAGAT  
AGGCGACACATTGCCACATCTCAAGATGCCCTTACGATTGACCTTACAAACCCATCAAAAAGATTTACTTGTATATCATCAACCACCTTGTTCGAG  
CAAGTCCAATCGCAAAAAGCAAAAACCTGGATTGGTTTCGCTTACATTGTGAATCAAAAACACAAGCGTCGAGCATTTCAGGTAGACCCGAAAGA  
AGTGTCTTCTGATGGCTTTATGCACAATGTCACTGTCTGTTCTAGATGGTCTTTGTGAGCCATTTCATGGATACCACATCTCGAAAATTTGGAAG  
ATTGATATTGATTATCTAAGACGTGCGCCTCGTGATAGATCAAGGACGAGACCAAGTTGAACGCTGACGAGAAGGCTTCTGAGAAGTATTATG  
AGGACACTGTTCCCTGGCACTTCTAATTTCACTCTGAGGTCTTCTTCTCACATTGG

>Bcin01g07220 (MLST1), partial sequence [organism=Botrytis cinerea, strain D13\_E\_IL12]  
GGTGTGGAAGTATCTGCGGATAGAGACCAATGAGCAGAGCAGCTATTGTAGATTTTCCGGAGCCGGAGGGTCCGACAAGTGCAGTTGTTGAGT  
TAGGAATCAGGGAAAGAGAAAAGGATGATATCGTTTCGTTTTTTCAGGACGAGTAGGGTATGTGAATGAGAGACGGTTGAATTTGATTGGAAAGAT  
TGTCGAAAAGCCGTTTCGGTTTCTTTATTTTCGTTGGGAGGAAGATGAATCGAGATTGGCTAATGCAAGCATAATGCGTAGCTGTAACGCGAGAAGAG  
TTGATTTGTGGTATCATGGCCAGCATATTCGTAATATTAGAAAATACCAAATAATAGAAGATTGACAGTCTGTAGTGCAGTGCAGTACGATACTGATCT  
CTCTCTTGGTAATGAGAACCCTGGCATAATAAAAAGATAGTTGCAGTGTGAGAATGACATCGCATCTGTCAATCCCCACAGCAATCCCAGTA  
GTTTGTCTGATTTAGTCCAACCTTATAAAGTTCTTCTGTAGCTTTGGTGTGTTTTGTCTCAAAGTAAAGTTTCCAGAGTAAAAGCCCGAACCT  
TTGATGTTGGAGAAAAGTCTCTGAAAATATGCCAGTGGTCAATTCAGAGGCGTAGTTGCACTTGTTTTCCCATTTTCCACTCACGCGATTGAACG  
TTTTGGTGACAGCGTATATAACTGGCCCAGTTGCCATCGAGACTAATGTCAGTTTCCATGTATTACGAAAAGCCCAAATGATTGATATCAATAG  
CATAAAAATGCTGTGAATACAATACCAGCAAAGCGGCCAACGAGATTACGCATTTCTCAGAGTTCTATCCAAAACCTTCGT

>Bcin05g07690 (MLST2), partial sequence [organism=Botrytis cinerea, strain D13\_E\_IL12]  
AGGATGCCCTTCTCTCTACGACAGCAAGCCTTCGATGATATGTTGTGGTAGTTCTTGGCTGGCTGGATACTGTCAAATTCATTGATTTACATTC  
TGAATTGCACTATTCAAACGACTCTCAGCCAGAATGGTACGGACAACAATATAAACCTGCATTTGCACATCGAGCGGACTATTTTGGGAATTG  
GCTTACAAGGATGGGATACTACTCTCTGTGGTGGTGGGATGATATGGTACCATACTTACTCCATACAAGAACGCAATTACCAATGAACCTCT  
ATATCGCAGCTTCGATATCGATGTACCTATATTTCCCCGGAGATGACAATCAATCCCCATTTATGATTTCCAACCTTTCATATCCACCTCACGA  
TCCGAAATATCTACAGGACGCTGTTGATGCTTACAAATGGCTGAATGGTTCCAACATGACGGATTACAAGGATTATATGTCGACGGGTACCAT  
ATCTCGAATCTTCTGCGGTGAAAACACCCATTCGATTTCTAGAAATGAGATGGTATATACTTACAATCAAGGTGTTTTGCTTACTGGACAAC  
GTGGTTTGTATGACGCAACCGCCGACGATCATACCTTGTAGATGGCCACAACTCATCGCGAATGTTATTAATGCCACAGGCTATGACCTGAA  
ACACAATGTTGTATCTCACCGCCACCCAAAGATGGTTCCGCATTTGGCAAAGTGGTTTGGCTGGGTAGGAATGGAATACCTGGAAGAAGGATGC  
GATTC AAGTGTCTCGTGTCTCAAATGGACAAAACCTTCAAAGGCATATCTTTCATCACTTGATTGCGTCTGTAGTATTGTCAGGGGAGC  
CTATTGCAAGGACGAAGGAA

>Bcin06g01710 (MLST3), partial sequence [organism=Botrytis cinerea, strain D13\_E\_IL12]  
AGCTTCGGAAGCGTCTTCCGAGAGGAATTTGCCAGTACGATAGTCGGTTACGAGTCCACTCTCTGAAAACCTGTTGCGAAGATAACTTGGTGT

TATGGATAGTGCATCGATCAGATCTTTGCGTTTCTTGACATATAGACAAGAAGCGTCGAAATTTGTGAGAAGCCATTTGTGCATGTTTCATATCG  
AAGGAATGGAAATGCTGGAAGGACGATGTTAGATGATGGTATTCAGGGCAAACCAAAGCTGCACCTGCATAAGCAGCATCGACGTGAACCCAGA  
TCTCGCCTGCAACATCTGGAGGTGCATATTTTGAAGTACTGTTGTAATAGATGCGAAGTCGTCAACTGCGCATGTAGATGTTGTTCCCAAAGT  
CGAAGTTAGATAGAAGGGTTCCAATCCCTGAGATTTGCATTTCTTCAATACCTTCTCTAAATCATCACCCGTGATGGCGAAATCATTTGGATGCG  
AGTACTGGAATCGATCGGAATCTAACGCCAGCTATCTGCGCTGCTTTCTGCGTGGAACTGTGTGCCATTTGCTTCCCTAGTGCAACTAGCTTAC  
TCCTTTTATATGCAATCGCATCCTCGAGTTCATACCCGACAGACCTTCAGTAGTTTCACGAAGATATTTATCGCGGGCAGCAACCATAACGGT  
AACGACAGCTTCCGAGGCTGATCCTTGGATAACACCACCACCATGAGTCGAAGACAAAATAACAGTCTGGGAGATTGAGAAGCTTGGCCAGCCAA  
TCCATTACAACCGTCTCCAATTTCTGTACAGCAGGGGAACAGATCCAATTGAAAGCAGGTGCTGTGAGAGCTGCTGAGTATAATTTCTCCAGCA  
TTCCAGGGTAGGTAGATGATGCAGGGAAGAACGCCATGAAATTAGGTGATTGCCTTG

>Bcin09g03030 (MLST4), partial sequence [organism=Botrytis cinerea, strain D13\_E\_IL12]  
GCAGAGAGAGTCTTGAGAGAGGTGCGCAAGAGTTGGAAGAATAGGAGTGGCGGTGTCAATTGTGAGGGCGAGGGAACGGAATTGAAGGAGATTC  
TGAAAGCTTTGGAAGGGAATATGAGTGGTGAAGGATAGTCATAGGAAGAGAGCTAAGCCGGCAGAATAGTTTAGTACTGGGATCATCACAATA  
TGGAGAGGTCAATCATAACAAGACTTGGGCTACGGCCAGGGAATATACCAGAGAGGATAGTCAGTCAAGTTTGGGAATGTCAACGTTGGAGGTC  
AATGACGAGGAAGATGAGGATGGCCTGATGGATCCAAGAAGGTGGTTAAAAGTCATTGATGCATTTGAGCAACCTCGACTGGTGTACAATGTTG  
CTAAAAGCACTTTGATAGGTATGTTTCAATGATAAGATTTTATCTGAATCGACTAAGTACAGTACAGAGATACCTCCAAACCTTCATTGTTCC  
ACCTGCGTCTCATAAAACACTCCTCTTCCAAAACCGCTATAATGTTATCCATCAACGCTCTCCTTCGCAATGAATCTTTTCAAACGCCCGCTTTT  
CAAGGTGGCAAATCTTCCCTTCAACGCAGCACGTCCGCCATTACCACCCAACAACAATCATACAAATTAACGCCGATAGCTAATCTTCTCGGTC  
GCAATCGCAGCTCTCATATGCTTCTCGGTCTCCTCAGTATTTACCCACTGGTACCCTCGGCATCAATGACCTG

>Bcin11g01310 (MLST5), partial sequence [organism=Botrytis cinerea, strain D13\_E\_IL12]  
TCATGTGGAACCGGCGTAGAATGCGCAACGCTTGAAGTTCCGCTCGAATATGGCGATGCAACGTCAACGGCAAAGCCAGTGTGCGCTTGCTC  
GTTATCCTGCCACTGTTGCCCGGAGCAAGAAGCTCGGGTCTCTCTTGATAAACCCCGTGGACCCGGTGCCTCTGGTGTGGCTTTGTGCAGTC  
TGGAGCCGGTGCCCGCTCTCGACACTGAGTGGTGGATTGTACGATATCATCGATGGGATCCACGTGGAACCGGTGCTTCGGCTCCTATTTTG  
GAATGTTTTGCAAAATGCCAGTGCAGGATGATGTTTTAACAACGCGTTTCCATCTGCTCCGAATCTCTGGCTCGGACAATTTGCGAATGCCAGCG  
CAAATTTCTGCTGTTAGCTCTGCTATCACATCCTTTGACACTTCTGTGCTGCTCTTGCAAAAGCTTGGCTGGCTCAGAAATCTCCCGCTCTTTA  
CACCTCAACAGCAGCATATGTTGCTCGAGACATGGCAGCGATAGTCGATGCATTGGATGGGACCTTGCAAAACTTAACCTACTGGGGTTTCTCA  
TATGAACTATTTTCTAGCTGAGTTTATCCAACTTTCCAGGCCGCTGGGAAGAGTTCTTGCCGATGGTGTGTTTTGACGCAAAGGCAAATG  
CACTCACATACGTTAGCCAACTTCCCAACGATCAACTCAGTGTTCGTGCTTCGTTGAACGATTTTGCAGCTTCTGCAACCCGCGGTAGTAA  
AGGTTGCTCTTTTGCCACCGCCCTACTGGAACCTCAGGTACTGTTGCTACCAGACTGGACAACATAATGAAAGATATG

>Bcin15g03910 (MLST6), partial sequence [organism=Botrytis cinerea, strain D13\_E\_IL12]  
TCTTGAAAGCCTTCTCTAGCATCTCCTCTCCTAACGTCATATGTCCCGTAGAATGGTTTCGAAAACATAATTTTCCGGCCTCATCCAATGTCTTT  
AAACCTAGCCAATCTTCTTTATAAATGGCTCTTTCTTTTTCAGTGGTGAACCTTCCGTGCCGTTGACTTTCAGCCACCATCCACTTTCTTTAGGGA  
TGACAGTTGTGTCGCTTCAAAGACATACATTACGAATCGTTCCAATTTTCCATGTTGGATTTATATGTTTGGTCTTTGAGAACGCGCTCATT  
ATTGATGTGCGCAAGGAAATTTGAATATTTCAAGGTAAGAGTCTAGGTTTTCGGATCTCTGAAGTATTGAGCGGGTACGAGACGAGATTGGACA  
AAGGTTGACCAGGTGTTGGATCGCAAAAAGGTTTGGACCCGCGACAGAGGAAATCGGCAGGACCACAGGCTTGGAAAGGCAGAAATGCCGTTGT  
GTTGGGAACCGAAGGTCAGGAGAGAGCGGATGGGTGGAGCATTGCAGCGGGATATGTAACCACGCAAGAATTGGCCGCTTGGGAGAATCCAAT  
TGCGTCGACGGCGGGCGGTTAGAGAGAATAGGATGGGAGGCGAGGTTCTCGCAGACCTTTTTCGATTTGAACCTTGGTAAGAGAGTTAGTATGAT  
ATTTAAAGGAAAAATAGGGAATGTACTCACGAGTGAGATTTCCAAAAGAAGGTAGCTGTCTATCTGCAGATGCATCCTCATCTACATGAATATT  
GTAGACAAAAGTCCAGGATGAATAGCTTACGCTAGTTTTTCCAACCTTGCAGCAAGACCATCCGCTTTGTAATTTATCGCCGAGTCCATGCCAGATA  
ATCAAGGGAAGTGGAGTATCAT

>Bcin16g03460 (MLST7), partial sequence [organism=Botrytis cinerea, strain D13\_E\_IL12]  
TCTTCATGAACCTCTTAATTTGAACTCTTCATTATTTGCAAGTATGAACCCCTATTTCTGCCAGAGGATAGTTACAAGACGTATATCATTAG  
TCGAGAACCACCTCATGATATATATTTGACGGATTTTGAAGCGAATGAAAGTAAACACTTGGTTGATGTTAGGTGTGTTATTTATTTCTGATGAA  
ATGAACAAGAGAGACTGATGAGATAGTGAACCGCTTTATGAACCGTCTACTGTTTCTCACGGGCAGGAAGTTACCATTGATACTTTCAGTTCCGAA  
ATTCTGAAGTGGCGGTTTTAGAGAGGGATGAGGTGGTCAGGTGATTTGAGCATAAGAGCGAGGGCATTTTCAGGGGTGGAGGGGCGAGATGGGGAT  
TGAGAAGTTGAGGACGAGAGGATATGGGTTGGAGGACATTATGGGATGCATTTGTAAGTTTGGGGGATTGACGAAGGCTTTTGTCTATTTTCT  
TACCAGTACGGATCTTGAAGAAAAGATAGCATGAACACGAGGGCTAATAACTAGGAAAATAGCGATTGGAGTGGAGGTAACGTTGGCATAGACCG  
ATTTAGTACTTTTCATGGTCTATGTGACGATCTCTCTGATATCGAAGGTGGAGGAAACGGAATTTCCACGATCTGTTGGGACCAAAGGAGGAAGG  
TGGGAGGACTTCTTGAAACTACGGAAGCATTGGATCCAAGAAGTGGAGAAAATGTAACAGTAGAAGGGGTGACATTTCAAACCAATCAAGGGAA  
ATGCCGATTTCT

>Bcin12g03020 (MLST8), partial sequence [organism=Botrytis cinerea, strain D13\_E\_IL12]  
ACTGCGCAGCACCGAGTCACAAAAGCAGCAATAAACCATCGGCAAGGAAAATATTTCTGTAACCACAACATGACACGAGCGCGGAAGAGTATA  
TCGGGCGAGAAGCTTCATCAAGAGCACCAAAGCGACAACGAGTCGATGATAATTTATAACTTTACGGTGGAAAGAAATGAAAATACAGCAGCTTA

TGCTTCCGGGAAACTTCCATCTGGAAGTATAAATGTTGGTGGAGGTAGGAAGACCCTTTTCAAGAAGAACCACGAACGGCATTGTGCTGCTGGC  
AAGTTGCCCCCTGGAAGTATCAACATTGGTGGAAAGAAGGCTACCCAAATCGAGGACGAGGGTAGAGCAGCTTATGCTTCCGAAAATTGCCTC  
CAGGAAGTATAAACTCTGGCGCAAAGAAGGCGATTTTCATTCCAAGATGAAACGAGACCGGCTTATGCTCCGGAAAAGCTTCCACATGGTAGTAT  
CGACGGTATGCGAAAACCGTGAAATGGCTGCCGTCCACCAGGAAATGCTGAGGGTGGGAGGAAACCAGGCCAGGTTGTCTCTTCTCTATTTCACA  
TTCAATCCTACTTCAAAGAAAACCTTTTGATGAACCCGAAGAACAAGCGGAACCGGCAAACCATCCAATGCGCCTTTGACAGAGGAAATGGCGA  
CTTTACCAATCTAGGGTTATCGAGAAGGCTTGCAGCCATCTATCGACTAACTCGATATGAAAGCTCCGACCGCCATTCAAAAAGCATCTGT  
ACAGCAGTTGGTATCGGACGATAGCGATGCTTTCATACAAGCAGAGACTGGATCTGGAAAAACTTTGGCATATCTACTACCTATAGTCGAGCGA  
ATATTAGCATTGAGTGAGAATGGCGT

>Bcin02g07770 (MLST9), partial sequence [organism=Botrytis cinerea, strain D13\_E\_IL12]  
CGATTTCGATGCCGTGTAGGATTGCCGAAAAGTGTTCACAGTGGGACCGTAGGAACAGTTTATGAGGCATATAAAACCATTCCCTTAAAGTCGTAAA  
TGGATGCGTACCATTCCCTGCCGTGCATCGGGTAACACAGGGTATGTCTTATACCTTTCTCTTCCACACGATTGCTATTGAGTCTCTAA  
CATATTTTAGTGGTGGTTTGTACCAACTGGCAGCAGCAATGGTGAATGCAGCAGCAGTACCGGTCAAGTATATGTTGAGGAGGACAAAGCGG  
ATCAAACCTACGCTATCATGTACTCCTGGTAAGTTCTCTCTAAACTTCTCCTTATAGATCCAACCTAACAAAATCTTAGGTACATGCCAAAGGAC  
GAGCCCTCAACCGGTATTGGTCCACCGTCACGATTGGGAAGGTGTAATTG

>Bcin04g02090 (MLST10), partial sequence [organism=Botrytis cinerea, strain D13\_E\_IL12]  
AACTGTGCAATATGACTATGAATGATGTTTACAAGCCCTACATCCATGTAAGAAATGTAGAAATAGAGAGATCAGTAACTGGAACATAATATCGTT  
TGTAGGCTTTCAAGTTACTTACGCAGTTCAACCCAACTACTACAGCTATTGCCGAATCCCCACTATTTCAAATGGCTGTCTCAGCAAATACCAT  
CGAAAAGTACACACTGCTAGGCCCTTTCTTTCAGAATATCTCTCTGCAACAGGAAGTTACCAGGAATACTTTCAGTGCGCCAAAGACGATAGAT  
AGGCGACACATTGCCACATCTCAAGATGCCTTACGATTGACCTTACAAACCCATCAAAAAGATTTACTTGTATATCATCAACCACCTTTGTTTCGAG  
CAAGTCCAATCGCAAAAAGCAAAAACCTGGATTGGTTCGCCTACATTGTGAATCAAAAATCACAAGCGTTCGAGCACTTCAGGTAGACCCGAAAGA  
AGTGTCTTCTGATGGCTTTATGCACAATGTCACTGTCTGTTCTAGATGGTCTTTGTGAGCCATTCATGGATACCACATTCTCGAAAATTTGGAAG  
ATTGATATTGATTATCTAAGACGTGCGCCTCGTGTAGATATCAAGGACGAGACCAAGTTGAACGCTGACGAGAAGGCTTCTGAGAAGTATTATG  
AGGACACTGTTCTGGCACTTCTAATTTTCATCTCTGAGGTCTTCTTTCTCACATTGG

>Bcin01g07220 (MLST1), partial sequence [organism=Botrytis cinerea, strain G11\_MG1\_E5]  
CTGAAATAGAATCGGTATTGTGAACGAGTGAGAGAGTAGCCCGAGAGACGGAATGTGACAGTTACTTATGAGACCGGATTGAATGTCAACGGTG  
GAGGTGTTGAAGTATCTGGCGGATAGAGACCAATGAGCAGAGCAGCTATTGTAGATTTTCCGGAGCCGGAGGGTCCGACAAGTGCAGTTGTTGA  
GTTAGGAATCAGGGAAAAGAGAAAAGGATGATATCGTTTCGTTTTTTCAGGACGAGTAGGATATGTGAATGAGAGACGGTTGAATTTGATTGGAAAG  
ATTGTGCAAAGCCGTTTCGTTCTTTATTTTCGTGGGAGGAAGATGAATCGAGATTGGCTAATGCAAGCATATGCGTAGCTGTAACGCGAGAAG  
AGTTGATTTGTGGTATCATGGCCAGCATATTCGTACTATTAGAAAATACCAAATAATAGAAGATTGACAGTCTGTAGTGCAGTCCGATACTGAT  
CTCTCTCTTGGTAATGAGAACCCTGGCATAATAAAAAGATAGTTGCAAGTATGAAAGATGACATCGCATCTGTCAATCCCCACAGCAATCCCGAG  
TAGTTTGTCTGATATTAGTCCAACCTTTATAAAAGTTCTTCTGTAGCTTTGGTGTGTTTTGTCTCAAAGTAAGTTTCCAGAGTAAAAGCCCGAACCA  
CTTTGATGTTGGAGAAAGTCTCTGAAAATATGCCAGTGGTCAATTCAGAGGCGTAGTTGCACCTGTTTTCCATTTTCCACTCACGCGATTGAA  
CGTTTTGGTGACAGCGTATATAACTGGCCAGTTGCCATCGAGACTAATGTCAGTTTCCATGTATTTCAGAAAAGCCCAAATGATTGATATCAAT  
AGCATAAAAAATGCTGTGAATACAATACCAGCAAAGCGGCCAACGAGATTACGCATTTCTCAGAGTTCTTATCCAAAACCTTCGT

>Bcin05g07690 (MLST2), partial sequence [organism=Botrytis cinerea, strain G11\_MG1\_E5]  
AGGATGCCTTCTCTCTACGACAGCAAGCCTTCGATGATATGTTGTGGGTAGTTCTTGGCTGGCTGGATACTGTCAAATTCATTGATTTACATTC  
TGAATTCGACTATTCAAACGACTCTCAGCCAGAATGGTACGGACAACAATAAAACCTGCATTTGCACATCGAGCGCGACTATTTGGGAATTG  
GCTTACAAGGATGGGATACTACTCTCTGTGGTGGTGGATGATATGGTACCATACTTACTCCATAACAAGAAGCAATTACCAATGAACCTCT  
ATATCGCAGCTTCGATATCGATGTACCTATATTTCCCGGAGATGACAATCAATCCCCATTTATGCTTTCCAACCCCTTCATATCCACCTCACGA  
TCCGAAAATATCTACAGGACGCTGTTGATGCTTACAAATGGCTGAATGGTTCCAACATGACGGATTTACAAGGATTTATATGTCGACGGGTACCAT  
ATCTCGAATCTTTCTGGCGGTGAAAACACCCATTGCGATTCTAGAAATGAGATGGTATATACCTACAATCAAGGTGTTTTGCTTACTGGACAAC  
GTGGTTTGTATGACGCAACCGCCGACGATCATACCTTGTAGATGGCCACAACTCATCGGAATGTTATTAATGCCACAGGCTATGACCTGAA  
ACACAATGTTGTCATCTCACCGCCACCCAAAAGATGGTTCCGCATTGGCAAAGTGGTTTTGGCTGGGTAGGAATGGAATACGGAAGAAGGATGC  
GATTC AAGTGCTTCGTGTTCTCAAATGGACAAAACCTTTCAAAGGCATATCTTTTCATCACTTGATTGCGTTCTGTAGTGATTTGCCAGGGGAGC  
CTATTGCAGGGACGAAGGAA

>Bcin06g01710 (MLST3), partial sequence [organism=Botrytis cinerea, strain G11\_MG1\_E5]  
AGCTTCGGAAGCGTCTTCCGAGAGGAATTTGCCAGTCCCGATAGTCGGTTACGAGTCCACTCTCTGAAAACCTGTTGCGAAGATAACTTGGTGT  
TATGGAGAGTGCATCGATCAGATCTTTGCGTTCTTGCATATAGACAAGAAGCGTCGAAATTTGTGAGAAGCCATTTGTGCATGTTTCATATCG  
AAGGAATGGAAATGCTGGAAGGACGATGTTAGATGATGGTATTCAGGGCAAACCAAAGCTGCACCTGCATAAGCAGCATCGACGTGAACCCAGA  
TCTCGCCTGCAACATCTGGAGGTGCATATTTTGAAGTACTGTTGCAATAGATGCGAAGTCTCAACTGCGCATGTAGATGTTGTTCCCAAAGT  
CGAAGTTAGATAGAAGGTTCCAATCCTTGAGATTTGCATCTTTCAATACCTTCTCTAAATCATCACCCGTCATGGCGAAATCATTTGGATGCG  
AGTACTGGAATCGATCGGAATCTAACGCCAGTATCTGCGCTGCTTTCTGCGTGGAGCTGTGTGCCATTTGCTTCCTAGTGCAACTAGCTTAC

```
TCCTCTTATATGCAATCGCATCCTCGAGTTCAATGCCCGACAGACCTTCAGTGGTTTCACGAAGATATTTATCGCGGGCAGCAACCATAACGGT
AACGATAGCTTCCGAGGCTGATCCTTGATAACACCACCACCATGAGTCGAAGACAAAATAACAGTCTGGGAGATTGAGAAGCTTGGCCAGCCAA
TCCATTACAACCGTCTCCAATTCTGTACAGCAGGGGAACAGATCCAATTGAAAAGCAGGAGCTGTGAAAGCTGCTGAGTATAATTTCTCCAGCA
TTCCAGGGTAGGTAGATGATGCAGGGGAAGAACGCCATGAAATTAGGTGATTGCCCTG
```

>Bcin09g03030 (MLST4), partial sequence [organism=Botrytis cinerea, strain G11\_MG1\_E5]

```
GCAGAGAGAGTCTTGAGGAGGTCGCCAAGAGTTGGAAGAATAGGAGTGGCGGTGTCATTGTCGAGGGCAGGGGAACGGAATTGAAGGAGATTC
TGAAAGCTTTGGAAGGGAATATGAGTGGTGAAGGATAGTCATAGGAAGAGAGCTAAGCCGGCAGAATAGTTTAGTACTGGGATCATCACAATA
TGGAGAGGTCAATCATAACAAGACTTGGGCTACGGCCAGGGAATATACCCAGAGAGGATAGTCAGTCAAGTTTGGGAATGTCAACGTTGGAGGTC
AATGACGAGGAAGATGAGGATGGCCTGATGGATCCAAGAAGGTGGTTAAAAGTCATTGATGCATTTGAGCAACCTCGACTGGTGTACAATGTTG
CTAAAAAGCACTTTGATAGGTATGTTTCAATGATAAGATTTTATCTGAATCGACTAACTCAGTACAGAGATACCTCCAAACCTTCATTGTTCCC
ACCTGCGTCTCATAAAACACTCCTCTTCCAAAACCGCTATAATGTTATCCATCAACGTCTCCTTCGCAATGAATCTTTTCAAACGCCCGCTTTT
CAAGGTGGCAAATCTTCCCTCAACGCAGCAGTCCGCCATTACCACCAACAACAATCATACAAATTAACGCCGATAGCTAATCTTCTCGGTC
GCAATCGCAGCTCTCATATGCTTCTCGGTCTCCTCAGTATTTACCCACTGGTACCCTCGCCATCAATGACCTG
```

>Bcin11g01310 (MLST5), partial sequence [organism=Botrytis cinerea, strain G11\_MG1\_E5]

```
TCATGTGGAACCGCGTAGAATGCGCAACGCTTGAAGTTCCGCTCGAATATGGCGATGCAACGTCAACGGCAAAGCCAGTGTTCGCTTGCTC
GTTATCCTGCCACTGTTGCCGCGAGCAAGAAGCTCGGGTCTCTTTGATAAAACCCCGTGGACCCGGTGCCTCTGGTGTGGCTTTGTGCAGTC
TGGAGCCGGTGGCCCGTCTCGACACTGAGTGGTGGATTGTACGATATCATCGGATGGGATCCACGTGGAACCGGTGCTTCGGCTCCTATTTTG
GAATGTTTTGCAAATGCCAGTGCAGGATGATGTTTTAACACGCGTTTCCATCTGCTCCGAATCTCTGGCTCGGACAATTTGCGAATGCCAGCG
CAAATCTGCTGTTAGCTCTGCTATCACATCCTTTGACACTTCTGTGCTGCTCTTGCAAAGCTTGGCTGGCTCAGAAATCTCCCGCTCTTTA
CACCTCAACAGCAGCATATGTTGCTCGAGACATGGCAGCGATAGTCGATGCATTGGATGGGACCTCTGCAAACTTAACACTGTTGGGTTTCTCA
TATGGAACATTTTTCTAGCTGAGTTTATCCAACTTTCCAGGCCGCTGGGAAGAGTCTTGCCGATGGTGTTTTCGACGCAAAGGCAAATG
CACTCACATACGTTAGCCAACTTCCCAACGATCAACTCAGTGTTCGTGCTTCGTTGAACGATTTTGCAGCTTTCTGCACCACCGCCGGTAGTAA
AGGTTGCTCTTTTGCCACCGCCCTACTGGAACCTCAGGTACTGTTGCTACCAGACTGGACAACATAATGAAGGATATG
```

>Bcin15g03910 (MLST6), partial sequence [organism=Botrytis cinerea, strain G11\_MG1\_E5]

```
TCTTTGAAAGCGTCTCTAGCATCTCCTCTCCTAACGTCATATGTCCCGTGGAATGGTTTCGAAAACATAATTTTCCGGCCTCATCCAATGTCT
TTAAACCTAACCAATCTTCTTTATAAAATGGCTCTTTCTTTTCAAGTGGTAACTTCCGTTGCCGTTGACTTCAGCCCACCATCCACTTTCCTTAGG
GATGACAGTTGTATCGTCTTCAAAGACATACATTACGAATCGTTCCAATTTTTCCATGTTGGATTTATATGTTTGGTCTTTGAGAACGCGCTCA
TTATTGATGTCGGCAAGGAAATGGAATATTCAGGTAAGAGTCTAGGTTTTCCGATCTCTGAAGTATTGAGCGGGTACGAGACGAGATTGGA
CAAAGGTTGACCAGGTGTTGGATCGCAAAAGGGTTTGGACCCGCGACAGAGGAAATCGGCAGGACCACAGGCTTGGAAAGGCAGAAATGCCGTT
GTGTTGGGAACCGAAGGTGAGGAGAGAGCGGATGGGTGGAGCATTGCAGCGGGATATGTAACCACGCAAGAAATGGCCGCTTTGGGAGAAATCCA
ATTGCGTGCAGCGCGGGCGGCTAGAGAGAATAGGATGGGAGGCGAGGCTTTCGCAGACCTTTTCGATTTGAACTTGGTAAGAGAGTTAGTATG
ATATTTAAAGGAAAAATAGGGGATGTACTCACGAGTGAGATTTCCAAAGAAGGTAGCTGTCTTATCTGCAGATGCATCCTCATCTACATGAATA
TTGTAGACAAAAGTCCAGGATGAATAGCTTCAGCTAGTTTTCCAACCTTGCAGCAAGACCATCCGCTTTGTAATTTATCGCCGAGTCCATGCCAGA
TAATCAAGGGAAGTGGAGTATCAT
```

>Bcin16g03460 (MLST7), partial sequence [organism=Botrytis cinerea, strain G11\_MG1\_E5]

```
TCTTCATGAACCTCTTAATTTGAACTCTTCATTATTTGCAAGTGATGAACCCCTATTTCTGCCCAGAGGATAGTTACAAGACGTATATCATTAG
TCGAGAACCACACTCATGATATATATTGACGGATTTTTGAAAAGCGAATGAAAGTAAACATTTGGTTGATGTTAGGTGTGTTATTTATTTCTGATGAA
ATGAACAAGAGAGACTGATGAGATAGTGAACCGCTTTATGAACCGTCTACTGTTTCTCACGGCAGGAAGTTACCATTGATACTTCAGTTTCGAA
ATTCTGAAGTGGCGGTTTTAGAGAGGGATGAGGTGGTCAAGTGTATTGAGCATAGAGCGAGGGCATTTCAGGGGTGGAGGGGCGAGATGGGGAT
TGAGAAGTTGAGGACGCGAGGATGAGGGTTGGAGGACATTATGGGATGCATTTGTAAGTTTTGGGGGATGACGAAGGCTTCTGTCTATTTTC
TACCAGTACGGATCTTGAAAGAAAAGATGGCATGAACACGAGGGCTAATAACTAGGAAATAGCGATTGGAGCGGAGGTAAACGTGGCATAGACCG
ATTTAGTACTTTTCATGGTCTATGTCGACGTATCCTCTGATATCGAAGGTGGAGGAACGGAAATCCCACGTATTGTGGGACCAAAGGAGGAAGG
TGGGAGGACTTCTTGAAAACCTACGGAAGCATTTGGATCCAAGAATGGAGAAAATGTAACAGTAGAAGGGGTGACATTCAAACCAATCAAGGGAA
ATGCCGTATTCT
```

>Bcin12g03020 (MLST8), partial sequence [organism=Botrytis cinerea, strain G11\_MG1\_E5]

```
ACTGCGCAGCACCAGTACACAAAAGCACGAATAAAACCATCGGCAAGGGAAAATATTTCTCTGAACCACAACATGACACGAGCGCGGAAGAGTATA
TCGGGCGAGAAGCTTCATCAAGAGCACCAAAGCGACAACGAGTCGATGATAAATTATAACTCTTACGGTGAAGAAAATGAAAATACAGCAGCTTA
TGCTTCCGGGAACTTCCATCTGGAAGTATAAATGTTGGTGGAGGTAGGAAGACCCTTTTCAAGAAGAACCACGAACGGCATTGTCTGCTGGC
AAGTTGCCCCCTGGAAGTATCAACATTTGGTGGAAAAGAGGCTACCCAAATCGAGGACGAGGGTAGAGCAGCTTATGCTTCCGGAAAATTTGCCCTC
CAGGAAGTATAAACTCTGGCGCAAAAGAGGCGATTTCAATCCAAAGATGAAACGAGACCCGGCTTATGCTTCCGGAAAAGCTTCCACATGGTAGTAT
CGACGGTATGCGAAACCGTGAAATGGCTGCCGTCCACCGCGAAAATGCTGAGGGTGGGAGGAAACCAGGCCAGGTTGTCTCTTCTCTATTACATA
TTCAATCTACTTCAAAGAAAACCTTTTATGTAACCCGAAGAACAAGCGGAACCGGCAAAACCATCCAATGCGCCTTTGACAGAGGAAATGGCGA
```



CTTTCACCAATCTAGGGTTATCGAGAAGGCTTGCAGCCCATCTATCGACTAAACTCGATATGAAAGCTCCGACCGCCATTCAAAAAGCATCTGT  
ACAGCAGTTGGTATCGGACGATAGCGATGCTTTCATACAAGCAGAGACTGGATCTGGAAAACTTTGGCATATCTACTACCTATAGTCGAGCGA  
ATATTAGCATTGAGTGAGAATGGCGTACA

>Bcin02g07770 (MLST9), partial sequence [organism=Botrytis cinerea, strain G11\_MG1\_E5]  
CATCTTCAGCCAGCGAGGATGACGAACTACCGCGGATAGACCCTATTGACAGATTTTAGCCCTAGTGGTGTGAATCGGAAAAAGATTATTTCC  
GAACCCCACTGACCTCTATTCTAAGTTCAAGTGACGTGAGTGTAGTATATCTCACGCCCTCAACAGATACTAAATATCAAACATTACACAGGC  
AAAAGCCAATAGACTCCCAGAATATAGCCCCTTATATTCATACATAAAGACACAAAAGTCTAGAAAAGTAGCCTTCGCAAGATTGTCTGTGAAAAC  
AGCCGGAATGAATGGAACATTCGCAGCACCGAAATCGGTGTTCTCAAGAGCAGTTTGAGCAGCAGTTGGTAAAGACTCCCAAGCAATCATAGGT  
TGTTTTCCACCAACAGTACTAGTAAGACCCATTGAGTGATCGACGGCCAGATACTTTCGTACTTGATAAGAGGGCTGGTACCAGAAAAGGGAAT  
AGCCATCCGTGGAACAATCCCAGCCTCCGTGGGCGGAAGGACAAACGGCTAAGATGTTGTCCGCAGTTGTGGCGGTGGCGCTGGAGAGCCAGAC  
AATTACACCTTCCCAATCGTGACGGTGACCAATACCGGTTGAGGGCTCGTCCCTTGGCATGTACCTAAGATTTTGTAGGTTGGATCTATAAGG  
AGAAGTTTAGAGAGAACTTACCAGAGTACATGATGGCGTAGTTTGTATCCGCTTTGTCCCTCGAACATATACTTGACCGGTACTGCTGCTGCA  
ACCACCATTGCTACTGCCAGTTGGTGACAAACCACCTAAAATATGTTAGAGACTCATAGCAATCGTGTGGAAGAGAAAGATATAAGGACATA  
CCCTGTGTTACCAGATGCATCGACGGCAGGGAAATGGTACGCATCCCTTTACGACT  
TTA

>Bcin04g02090 (MLST10), partial sequence [organism=Botrytis cinerea, strain G11\_MG1\_E5]  
AACTGTGCAAAAATGACTATGAATGATGTTTACAAGCCCTACATCCATGTAAGAAATGTAGAATAGAGAGATCAGTAACTGGAACATAATATCGTT  
TGTAGGCTTTCAAGTTACTTACGCAGTTCAACCCAATCACTACAGCTATTGCCGAATCCCCTACTATTTCAAATGGCTGTCTCAGCAAATACCAT  
CGAAAAGTACACACTGCTAGGCCCTTCTTTCAGAATATCTCCTCTGCAACAGGAAGTTACCAGGGAATACCTCAGTGCGCCAAAGACGATAGAT  
AGGGCAGACATTGCCACATCTCAAGATGCCCTTACGATTGACCTTACAAAACCCATCAAAAAGATTTACTTGATATCATCAACCACCTTGTTCGAG  
CAAGTCCAATCGCAAAAAGCAAAAACCTGGATTGGTTCGCCTACATTTGTGAATCAAAATCACAAGCGTCGAGCACTTCAGGTAGACCCGAAAGA  
AGTGTCTTCTGATGGCTTTATGCACAATGTCACTGTCGTTCTAGATGGTCTTTGTGAGCCATTCATGGATACCACATTTCTCGAAAATTTCTGAAG  
ATTGATATTGATTATCTAAGACGTGCGCCTCGTGTAGATATCAAGGACGAGACCAAGTTGAACGCTGACGAGAAGGCTTCTGAGAAGTATTATG  
AGGACACTGTTTCTGGCACTTCTAATTTTCATCTCTGAGGTCTTCTTCTCACATTTG

>Bcin01g07220 (MLST1), partial sequence [organism=Botrytis cinerea, strain G11\_MG1\_E7]  
GGTGTGAAAGTATCTGGCGGATAGAGACCAATGAGCAGAGCAGCTATGTAGATTTTCCGGAGCCGGAGGGTCCGACAAGTGCAGTTGTTGAGTT  
AGGAATCAGGGAAAAGAGAAAAGGATGATATCGTTTCGTTTTTCAGGACGAGTAGGGTATGTGAATGAAAGACGGTTGAATTTGATTGGAAAGATT  
GTCGAAAGCCGTTCCGTTCTTTATTTTCGTGGGAGGAAGATGAATCGAGATTGGCTAATGCAAGCATATGCGTAGCTGTAACGCGAGAAGAGT  
TGATTTGTGGTATCATGGCCAGCATATTCGTACTATTAGAAAATACCAAATAATAGAAAGATTGACAGTCTGTAGTGCAGTCGCGATACTGATCTC  
TCTCTTGGTAATGAGAACCCTGGCATAATAAAAAGATAGTTGCAGTGATGAAGAAATGACATCGCATCTGTCAATCCCCACAGCAATCCCGAGTAG  
TTTGCTCGTATTAGTCCAACCTTTATAAAGTTCTTCTGTAGCTTTGGTGTGTTTTGTCTCAAAGTAAGTTTCCAGAGTAAAAGCCCGAACCACTT  
TGATGTTGGAGAAAGTCTCTGAAAATATGCCAGTGGTCATTTTCAGAGCGTAGTTGCACTTGTTTTCCCATTTTCCACTCACGCGATTGAACGT  
TTTGGTGACAGCGTATATAACTGGCCAGTTGCCATCGAGACTAATGTCAGTTTCCATGTATTCACGAAAGCCCAAATGATTGATATCAATAGC  
ATAAAAATGCTGTGAATACAATACCAGCAAAGCGGCCAACGAGATTACGCATTTCCCTCAGAGTTCCCTATCCAAAACCTTCGT

>Bcin05g07690 (MLST2), partial sequence [organism=Botrytis cinerea, strain G11\_MG1\_E7]  
AGGATGCCTTCTCTCTACGACAGCAAGCCTTCGATGATATGTTGTGGGTAGTTCTTGGCTGGCTGGATACTGTCAAATTCATTGATTTACATTC  
TGAATTCGACTATTCAAACGACTCTCAGCCAGAATGGTACGGACAACAATAAAACCTGCATTTGCACATCGAGCGCGACTATTTTGGGAATTG  
GCTTACAAGGATGGGATACTACTCTCTGTGGTGGTGGGATGATATGGTCACCATACCTTACTCCATAACAAGAAGCAATTACCAATGAACCTCT  
ATATCGCAGCTTCGATATCGATGTACCTATATTTCCCCGGAGATGACAATCAATCCCCATTTATGCTTTCCAACCCCTTCATATCCACCTCACAA  
TCCGAAAATATCTACAGGCAGCTGTTGATGCTTACAAATGGCTGAATGGTTCCAACATGACGGATTTACAAGGATTATATGTCGACGGGTACCAT  
ATCTCGAATCTTCTGCGGTGAAAACACCCATTGCGATTCTAGAAAATGAGATGGTATATACCTACAATCAAGGTGTTTTGCTTACTGGACAAC  
GTGGTTTGTATGACGCAACCGCCGACGATCATACCTTGTAGATGGCCACAACTCATCGGAATGTTATTAATGCCACAGGCTATGACCTGAA  
ACACAATGTTGTCATCTCACCGCCACCCAAAAGATGGTTCCGCATTTGGCAAAGTGGTTTTGGCCGGGTAGGAATGGAATACGGAAGAAGGATGC  
GATTC AAGTGCTTCGTGTTCTCAAAAATGGACAAAACCTTTCAAAGGCATATCTTTTCATCACTTGATTGCGTTCGTAGTGTATTGCCAGGGGAGC  
CTATTGACAGGACGAAGGAA

>Bcin06g01710 (MLST3), partial sequence [organism=Botrytis cinerea, strain G11\_MG1\_E7]  
AGCTTCGGAAGCGTCTTCCGAGAGGAATTTGCCAGTCCCGATAGTCGGTTACGAGTCCACTCTCTGAAAACCTGTTGCGAAGATAACTTGGTGT  
TATGGAGAGTGCATCGATCAGATCTTTGCGTTCTTGACATATAGACAAGAAGCGTCGAAAATTTGTGAGAAGCCATTTGTGCATGTTTCATATCG  
AAGGAATGGAAATGCTGGAAGGACGATGTTAGATGATGGTATTCAGGGCAAACCAAAGCTGCACCTGCATAAGCAGCATCGACGTGAACCCAGA  
TCTCGCCTGCAACATCTGGAGGTGCATATTTTGAAAAGTACTGTTGCAATAGATGCGAAGTCTCAACTGCGCATGTAGATGTTGTTCCCAAAGT  
CGAAGTTAGATAGAAGGTTCCAATCCTTGAGATTTGCATTTCTCCAATACCTTCTCTAAATCATCACCCGTCATGGCGAAATCATTTGGATGCG  
AGTACTGGAATCGATCGGAATCTAACGCCAGTATCTGCGCTGCTTTCTGCGTGGAGCTGTGTGCCATTTGCTTCCCTAGTGAACCTAGCTTAC

```
TCCTCTTATATGCAATCGCATCCTCGAGTTCAATGCCCGACAGACCTTCAGTAGTTTCACGAAGATATTTATCGCGGGCAGCAACCATAACGGT
AACGATAGCTTCCGAGGCTGATCCTTGATAACACCACCACCATGAGTCGAAGACAAAATAACAGTCTGGGAGATTGAGAAGCTTGGCCAGCCAA
TCCATTACAACCGTCTCCAATTTCTGTACGGCAGGGGAACAGATCCAATTTGAAAAGCAGGAGCTGTGAAAGCTGCTGAGTATAATTTCTCCAGCA
TTCCAGGGTAGGTAGATGATGCAGGGGAAGAACGCCATGAAATTAGGTGATTGCCCTTG
```

```
>Bcin09g03030 (MLST4), partial sequence [organism=Botrytis cinerea, strain G11_MG1_E7]
GCAGAGAGAGTCTTGAGGAGGTCGCCAAGAGTTGGAAGAATAGGAGTGGCGGTGTCATTGTGCGAGGGCAGGGAAACGGAATTTGAAGGAGATTC
TGAAAGCTTTGGAAGGGAATATGAGTGGTGAAGGATAGTCATAGGAAGAGAGCTAAGCCGGCAGAATAGTTTAGTACTGGGATCATCACAATA
TGGAGAGGTCAATCATAACAAGACTTGGGCTACGGCCAGGGAATATACCCAGAGAGGATAGTCAGTCAAGTTTGGGAATGTCAACGTTGGAGGTC
AATGACGAGGAAGATGAGGATGGCCTGATGGATCCAAGAAGGTGGTTAAAAGTCATTGATGCATTTGAGCAACCTCGACTGGTGTACAATGTTG
CTAAAAAGCACTTTGATAGGTATGTTTCAATGATAAAAAATTTATCTGAATCGACTAACTCAGTACAGAGATACCTCCAAACCTTCATTGTTCCC
ACCTGCGTCTCATAAAAACACTCCTCTTCCAAAACCGCTATAATGTTATCCATCAACGTCTCCTTCGCAATGAATCTTTTCAAACGCCCGCTTTT
CAAGGTGGCAAATCTTCCCTTCAACGCAGCAGTCCGCCATTACCACCAACAACAATCATACAAATTAACGCCGATAGCTAATCTTCTCGGTC
GCAATCGCAGCTCTCATATGCTTCTCGGTCTCCTCAGTATTTACCCACTGGTACCCTCGCCATCAATGACCTG
```

```
>Bcin11g01310 (MLST5), partial sequence [organism=Botrytis cinerea, strain G11_MG1_E7]
TCATGTGGAACCGCGTAGAATGCGCAACGCTTGAAGTTCCGCTCGAATATGGCGATGCAACGTCAACGGCAAAGCCAGTGTTCGCTTGCTC
GTTATCCTGCCACTGTTGCCGCGAGCAAGAAGCTCGGGTCTCTTTGATAAAACCCCGTGGACCCGGTGCCTCTGGTGTGGCTTTGTGCAGTC
TGGAGCCGGTGGCCCGTCTCGACACTGAGTGGTGGATTGTACGATATCATCGGATGGGATCCACGTGGAACCGGTGCTTCGGCTCCTATTTTG
GAATGTTTTGCAAATGCTAGTGCAGGATGATTTTAAACAACGCTTTCCATCTGCTCCGAATCTCTGGCTCGGACAATTTGCGAATGCCAGCG
CAAATCTGCTGTTAGCTCTGCTATCACATCCTTTGACACTTCTGTGCTGCTCTTGCAAAGCTTGGCTGGCTCAGAAATCTCCCGCTCTTTA
CACCTCAACAGCAGCATATGTTGCTCGAGACATGGCAGCGATAGTCGATGCATTGGATGGGACCTCTGCAAAACTTAACTACTGGGGTTTCTCA
TATGGAACATTTTTCTAGCTGAGTTTATCCAAACTTTCCAGGCCGCTGGGAAGAGTCTTGCCGATGGTGTTTTCGACGCAAAGGCAAATG
CACTCACATACGTTAGCCAACTTCCCAACGATCAACTCAGTGTTCGTGCTTCGTTGAACGATTTTGCAGCTTTCTGCACCACCGCCGGTAGTAA
AGGTTGCTCTTTTGCCACCGCCCTACTGGAACCTCAGGTACTGTTGCTACCAGACTGGACAACATAATGAAGGATATG
```

```
>Bcin15g03910 (MLST6), partial sequence [organism=Botrytis cinerea, strain G11_MG1_E7]
TCTTTGAAAGCCTTCTCTAGCATCTCCTCTCCTAACGTCATATGTCCCCCTGGAATGGTTTCGAAAACATAATTTTCCGGCCTCATCCAATGTCT
TTAAACCTAGCCAATCTTCTTTATAAAATGGCTCTTTCTTTTCAAGTGGTAACTTCCGTTGCCGTTGACTTCAGCCCACCATCCACTTTCCTTAGG
GATGACAGTTGTATCGTCTTCAAAGACATACATTACGAATCGTTCCAATTTTTCCATGTTGGATTTATATGTTTGGTCTTTGAGAACGCGCTCA
TTATTGATGTCGGCAAGGAAATTTGGAATATTTCAAGGTAAGAGTCTAGGTTTTCCGATCTCTGAAGTATTGAGCGGGTACGAGACGAGATTGGA
CAAAGGTTGACCAGGTGTTGGATCGCAAAAGGGTTTGGACCCGCGACAGAGGAAATCGGCAGGACCACAGGCTTGGAAAGGCAGAAATGCCGTT
GTGTTGGGAACCGAAGGTGAGGAGAGCGGATGGGTGGAGCATTGCAGCGGGATATGTAACCGCGCAAGAAATGGCCGCTTTGGGAGAAATCCA
ATTGCGTGCAGCGCGGGCGGTTAGAGAGAATAGGATGGGAGGCGAGGCTTTCGCAGACCTTTTCGATTTGAACTTGGTAAGAGAGTTAGTATG
GTATTTAAAGGAAATAGGGGATGTACTCACGAGTGAGATTTCCAAAGAAGGTAGCTGTCTTATCTGCAGATGCATCCTCATCTACATGAATA
TTGTAGACAAAAGTCCAGGATGAATAGCTTCAGCTAGTTTTTCCAACCTTGCAGCAAGACCATCCGCTTTGTAATTTATCGCCGAGTCCATGCCAGA
TAATCAAGGGAAGTGGAGTATCAT
```

```
>Bcin16g03460 (MLST7), partial sequence [organism=Botrytis cinerea, strain G11_MG1_E7]
TCTTCATGAACCTCTTGATTTGAACTCTTCATTAATTGCAAGTGATGAACCCCTATTTCTGCCAGAGGATAGTTACAAGACGTATATCATTAGT
CGAGAACCCTCATGATATATATTGACGGATTTTTGAAAGCGAATGAAAGTAAACATTTGGTTGATGTTAGGTGTGTTATTCATTTCTGATGAAA
TGAACAAGAGAGACTGATGAGATAGTGAACCGCTTTATGAACCATCTACTGTTTCTCACGGACAGGAAGTTACCATTGATCCTTCAGTTCGGAA
TTCTGAAGTGGCGGTTTTAGAGAGGGATGAGGTGGTCAAGTGTATTGAGCATAGAGCGAGGGCATTTCAGGGGTGGAGGGGCGAGATGGGGATT
GAGAAGTTGAGGACGCAGAGGTATGGGGTTGGAGGACATTATGGGATGCATTTGTAAGTTTTGGGGGATTGACGAAGGCTTTTTGTCTATTTTCT
ACCAGTACGGATCTTTGAAAGAAAGATAGCATGAACACGAGGGCTGATAACTAGGAAATAGCGATTGGAGCGGAGGTAAACGTGGCATAGACCGA
TTTAGTACTTTTCATGGTCTATGTGACGATCCTCTGATATCGAAGGTGGAGGAACGGAATTTCCACGTATCGTGGGACCAAAGGAGGAAGGT
GGGAGGACTTCTTGAAACTACGGAAGCATTTGGATCCAAGAATGGAGAAAATGTAACAGTAGAAGGGGTGACATTTCAAACCAATCAAGGAAA
TGCCGTATTCT
```

```
>Bcin12g03020 (MLST8), partial sequence [organism=Botrytis cinerea, strain G11_MG1_E7]
ACTGCGCAGCACCAGTACCCAAAAGCACGAATAAAACCATCGGCAAGGGAAAATATTTCTCTGAACCCACAACATGACACGAGCGCGGAAGAGTATA
TCGGGCGAGAAGCTTCATCAAGAGCACCAAAGCGACAACGAGTCGATGATAAATTATAACTCTTACGGTGAAGAAATGAAAATACAGCAGCTTA
TGCTTCCGGGAAACTTCCATCTGGAAGTATAAATGTTGGTGGAGGTAGGAAGACCCTTTTCAAGAAGAACCACGAACGGCATTGTGCTGCTGGC
AAGTTGCCCCCTGGAAGTATCAACATTTGGTGGAAAGAGGCTACCCAAATCGAGGACGAGGGTAGAGCAGCTTATGCTTCCGGAAAATTTGCCCTC
CAGGAAGTATAAACTCTGGCGCAAAGAGGCGATTTCAATCCAAAGATGAAACGAGACCGGCTTATGCTTCCGGAAAAGCTTCCGCATGGTAGTAT
CGACGGTATGCGAAACCGTGAAATGGCTGCCGTCCACCGCGAAAATGCTGAGGGTGGGAGGAAACCAGGCCAGGTTGTCTCTTCTTATTCACA
TTAATCTACTTCAAAGAAAACCTTTTGTGATGAACCCGAAGAACAAGCGGAACCGGCAAACCATCCAATGCGCCTTTGACAGAGGAAATGGCGA
```

CTTTCACCAATCTAGGGTTATCGAGAAGGCTTGCAGCCCATCTATCGACTAAACTCGATATGAAAGCTCCGACCGCCATTCAAAGCATCTGT  
ACAGCAGTTGGTATCGGACGATAGCGATGCTTTCATACAAGCAGAGACTGGATCTGGAAAACTTTGGCATATCTACTACCTATAGTCGAGCGA  
ATATTAGCATTGAGTGAGAATGGCGT

>Bcin02g07770 (MLST9), partial sequence [organism=Botrytis cinerea, strain G11\_MG1\_E7]  
CGATTCCGATGCCGTGATAGGATTTGCCGAAACTGTTCCAGTGGGACCGTAGGAACAGTTTATGAGGCATATAAACCATTTCCCTTAAAGTCGTA  
AATGGATGCGTACCATTCCCTGCCGTCGATGCATCGGGTAAACACAGGGTATGTCTTATACCTTTCTCTTCCACACGATTGCTATTGAGTCTCT  
GACATATTTTAGTGGTGGTTTGTCCACCAACTGGCAGTAGCAATGGTGGTTCAGCAGCAGTACCGGTCAAGTATATGTTTCGAGGAGGACAAAGC  
GGATCAAACACTACGCCATCATGTACTCCTGGTAAGTTCTCTCTAAACTTCTCTTATAGATCCAACCTAACAAAATCTTAGGTACATGCCAAAGG  
ACGAGCCTTCAACCGGTATTGGTCACCGTCACGATTGGGAAGGTGTAATTGTCTGGCTCTCCAGCGCCACCGCCACAACCTGCCGACAACATCTT  
AGCCGTTTGTCTTCTGCCACGGAGGCTGGGATTGTTCCACCGATGGCTATTTCCCTTCTGGTACCAGCCCTCTTATCAAGTACGAAAGTATC  
TGGCCCGTCGATCATTCAATGGGTCTTACTAGTACTGTTGGTGGAACACAACCTATGATCGCTTGGGAGTCTTTACCTACTGCTGCTCAAACCTG  
CTCTTGAGAACACCGATTTCGGTGCTGCGAATGTTCCATTCATTCCGGCTGTTTTTCACAGATAATCTTGCGAAGGCTACTTTCTAG

>Bcin04g02090 (MLST10), partial sequence [organism=Botrytis cinerea, strain G11\_MG1\_E7]  
AACTGTCTGAATATGACTATGAATGATGTTTACAAGCCCTACATCCATGTAAGAAATGTAGAATAGAGAGATCAGTAACTGGAACCTAATATCGTT  
TGTAGGCTTTCAAGTTACTTACGCAGTTCAACCCAATCACTACAGCTATTGCCGAAATCCCACTGTTTCAAATGGCCGTCCTCAGCAAATACCAT  
CGAAAAGTACACACTGCTAGGCCCTTTCTTTCAGAAATATCTCTCTGCAACAGGAAGTTACCAGGGAATACCTCAGTGCGCCAAAGACGATAGAT  
AGGCGACACATTGCCACATCTCAAGATGCGTTACGATTGACTCTACAAACCCATCAAAAAGATTTACTTGATATCATCAACCCTTTGTTTCGAG  
CAAGTCCAATCGCAAAAAGCAAAAACCTGGATTGGTTCGCCTACATTGTGAATCAAAAACACAAGCGTCGAGCACTTCAGGTAGACCCGAAAGA  
AGTGTCTTCTGATGGCTTTATGCACAATGTCACTGTCGTTCTAGATGGTCTTTGTGAGCCATTCATGGATAACCACATTTCTCGAAAATTTTGAAG  
ATTGATATTGATTATCTAAGACGTGCGCCTCGTGATAGATCAAGGACGAGACCAAGTTGAACGCTGACGAGAAGGCTTCTGAGAAGTATTATG  
AGGACACTGTTCTTGGCACTTCTAATTTTCATCTCTGAGGTCTTCTTTCTCACATTGG

>Bcin01g07220 (MLST1), partial sequence [organism=Botrytis cinerea, strain N11\_S\_E10]  
GGTGTGAAGTATCTGGCGGATAGAGAACCAATGAGCAGAGCAGCTATCGTAGATTTTCCGGAGCCGGAGGGTCCGACAAGTGCAGTTGTTGAGT  
TAGGAATCAGAGAAAAGAGAAAAGGATGATATCGTTTCGTTTTTTCAGGACGAGTAGGGTATGTGAATGAAAGACGGTTGAATTTGATTGGAAAGAT  
TGTCGAAAGCCGTTTCGGTTCCTTTATTTTCGTGGGAGGAAGATGAATCGAGATTGGCTAATGCAAGCATAATGCGTAGCTGTAACCGGAGAAGAG  
TTGATTTGTGGTATCATAGCCAGCATATTCGTACTATTAGAAAATACCAAATAATAGAAGATTGACAGTCTGTAGTGCAGTGCGAATACTGATCT  
CTCTCTTGGTAATGAGAACCCTGGCATAATAAAAAGATAGTTGCAAGTATGAAGAATGACATCGCATCTGTCAATCCCCACAGCAATCCCGAGTA  
GTTTGTCTCGTATTAGTCCAACCTTTATAGAGTTCTTCTGTAGCTTTGGTGTGTTTTGTCTCAAAGTAAGTTTCCAGAGTAAAAGCCCGAACCACT  
TTGATGTTGGAGAAAGTCTCTGAAAATATGCCAGTGGTCATTTTCAGATGCGTAGTTGCACCTGTTTTCCATTTTCCACTCACGCGATTGAACG  
TTTTTGGTGACAGCGTATATAACTGGCCCAGTTGCCATTGAGACTAATGTCAGTTTCCATGTATTTCACGAAAGCCCAAATGATTGATATCAATAG  
CATAAAAATGCTGTGAATACAATACCAGCAAAGCGGCCAACGAGATTACGCATTTCTCAGAGTTCCCTATCCAAAACCTTCGT

>Bcin05g07690 (MLST2), partial sequence [organism=Botrytis cinerea, strain N11\_S\_E10]  
AGGATGCCCTTCTCTCTACGACAGCAAGCCTTCGATGATATGTTGTGGGTAGTTCTTGGCTGGCTGGATACTGTCAAATTCATTGATTTACATTC  
TGAATTGCACTATTCAAACGACTCTCAGCCAGAATGGTACGACACAATATAAACCTGCATTTGCACATCGAGCGGACTATTTTGGGAATTG  
GCTTACAAGGATGGGATACTACTCTCTGTGGTGGTGGGATGATATGGTCACCATACTTACTCCATACAAGAAATGCAATTACCAATGAACCTCT  
ATATCGCAGCTTCGATATCGATGTACCTCTATTTCCCGGAGATGACAATCAATCCCAATTTATGCTTTCCAACCCCTCATATCCACCTCACGA  
TCCGAAATATCTACAGGCAGCTGTTGATGCTTACAAATGGCTGAATGGTTCACACATGACGGATTTACAAGGATTATATGTCGACGGGTATCAT  
ATCTCGAATCTTTCTGGCGGTGAAAACACCCATTGCGATTCTAGAAAATGAGATGGTATATACCTACAATCAAGGTGTTTTGCTTACTGGACAAC  
GTGGTTTGTATGACGCAACC GCCGACGATCATACTTGTGGATGGCCACAAACTCATCGCAATGTTATTAATGCCACAGGCTATGACCTGAA  
ACACAATGTTGCCATCTCACCGCCACCCAAAAGATGGTTCCGCATTGGCAAAGTGGTTTGGCTGGGTAGGAATGGAATACTGGAAGAAGGATGC  
GATTCAAGTGCTTCGTGTTCTCAAATGGACAAACTTTCAAAGGCATATTTCTTTACCCTTGATTGCGTTCGTAGTATTGTCAGGGGAGC  
CTATTGCAGGGACGAAGGAA

>Bcin06g01710 (MLST3), partial sequence [organism=Botrytis cinerea, strain N11\_S\_E10]  
AGCTTCGAAACGCTCTCCGAGAGGAATTTGCCAGTCCCGATAGTCGGTTACGAGTCCACTCTCTGAAAACCTGCTTGCGAAGATAACTTGGTGT  
TATGGAGAGTGCATCGATCAGATCTTTGCGTTTCTTGACATATAGGCAAGAAGCGTCGAAAATTTGTGAGAAGCCATTTGTGCATGTTTCATATCA  
AAGGAATGGAATGCTGGAAGGACGATGTTAGATGATGGTATTCAGGGCAAACCAAAGCTGCACCTGCATAAGCAGCATCGACGTGAACCCAGA  
TCTCGCCTGCAACATCTGGAGGTGCATATTTTGAAGTACTGTTGCAATAGATGCGAAGTCTCAACTGCGCATGTAGATGTTGTTCCCAACGT  
CGAAGTTAGATAGAAGGGTTCCAATCCTTGAGATTTGCATTTCTTCAATACCTTCTCTAAATCATCACCCGTCATGGCGAAATCATTTGGATGCG  
AGTACTGGAATCGATCGGAATCTAACGCCAGCTATCTGCGCTGCTTTCTGCGTGGAGCTGTGTGCCATTTCCGCTTCTTAGTGCAACTAGCTTAC  
TCTCTTATATGCAATCGCATCCTCGAGTTCAATTTCCCGACAGACCTTCAGTGGTTTACGGAAGATACTTATCGCGGGCAGCAACCATAACGGT  
AACGATAGCTTCCGAGGCTGATCCTTGGATAACACCACCACCATGAGTGCAGCACAATAACAGTCTGGGAGATTGAGAAGCTTGGCCAACCAA  
TCCATTACAACCGTCTCCAATTTCTGTCACAGCAGGGGAACAGATCCAATTTGAAAGCAGGAGCTGTGAAAGCTGCTGAGTATAATTTCTCCAGCA

TTCCAGGGTAGGTAGATGATGCAGGGAAGAACGCCATGAAATTAGGTGATTGCCTTG

>Bcin09g03030(MLST4), partial sequence [organism=Botrytis cinerea, strain N11\_S\_E10]  
GCAGAGAGAGTCTTGGAGGAGGTCGCCAAGAGTTGGAAGAATAGGAGTGGCGGTGTCATTGTCGAGGGCGAGGGAACGGAATTGAAGGAGATTC  
TGAAAGCTTTGGAAGGGAATATGAGTGGTGAAGGATAGTCATAGGAAGAGAGCTAAGCCGGCAGAATAGTTTAGTACTGGGATCATCACAATA  
TGGAGAGGTCAATCATAACAAGACTTGGGCTACGGCCAGGGAATATACCCAGAGAGGATAGTCAGTCAAGTTTGGGAATGTCAACGTTGGAGGTC  
AATGACGAGGAAGATGAGGATGGCCTGATGGATCCAAGAAGGTGGTTAAAAAGTCGTTGATGCATTTGAGCAACCTCGACTGGTGTACAATGTTG  
CTAAAAAGCACTTTGATAGGTATGTTTCAATGATAAAAAATTTTATCTGAATCGACTAACTCAGTACAGAGATACCTCCAAACCTTCATTGTTCCC  
ACCTGCGTCTCATAAAACACTCCTCTTCCAAAACCGCTATAATGTTATCCATCAACGTCTCCTTCGCAATGAATCTTTTCAAACGCCCGCTTTT  
CAAGGTGGCAAATCTTCCCTTCAACGCAGCACGTCCGCCATTACCACCCAACAACAATCATACAAAATTAACGCCGATAGCTAATCTTCTCGGTC  
GCAATCGCAGCTCTCATATGCTTCTCGGTCTCCTCAGTATTTACCCCACTGGTACCCTCGCCATCAATGACCTG

>Bcin11g01310(MLST5), partial sequence [organism=Botrytis cinerea, strain N11\_S\_E10]  
TCATGTGGAACCGGCGTAGAATGCGCAACGCTTGAAGTTCCGCTCGAATATGGCGATGCAACGTCAACGGCAAAAGCCAGTGTTCGCGTTGCTC  
GTTATCCTGCCACTGTTGCCCGAGCAAGAAGCTCGGGTCTCTCTTGATAAAATCCCGGTGGACCCGGTGCCTCTGGTGTGGCTTTGTGCAGTC  
TGGAGCCGGTGGCCCGTCTCGACACTGAGTGGTGGATTATACGATATCATCGGATGGGATCCACGTGGAACCGGTGCTTCGGCTCCTATTTTG  
GAATGTTTTGCAAAATGCCAGTGCAGGATGATGTTTAAACAACGCTTTCCATCTGCTCCGAATCTCTGGCTCGGACAATTTGCGAATGCCAGCG  
CAAAATCTGCTGTTAGCTCTGCTATCACATCCTTTGACACTTCTGTGCTGCTCTTGCAAAAAGCTTGGCTGGCTCAGAAATCTCCCGCTCTTTA  
CACCTCAACAGCAGCATATGTTGCTCGAGACATGGCAGCGATAGTCGATGCATTTGGATGGGACCTCTGCAAAACTTAACTACTGGGGTTTCTCA  
TATGGAACATCTTCCTAGCTGAGTTTATCCAAACTTTCCCAGGCCGCTGGGAAGAGTCTTGGCCGATGGTGTGTTTTGACGCAAAGGCAAATG  
CACTCACATACGTTAGCCAACTTCCCAACGATCAACTCAGTGTTCGTGCTTCGTTGAACGATTTTGCAGCTTTCTGCACCACCGCCGGTAGTAA  
AGGTTGCTCTTTTGGCACCGCCCTACTGGAACCTCAGGTACTGTTGCTACCAGACTGGACAACATAATGAAGGATATG

>Bcin15g03910(MLST6), partial sequence [organism=Botrytis cinerea, strain N11\_S\_E10]  
TCTTTGAAAGCCTTCTCTAGCATCTCCTCTCCTAACGTCATATGTCCCCCTGGAATGGTTTCGAAAACATAATTTTCCGGCCTCATCCCAATGTC  
TTTAAACCTTAGCCAATCTTCTTTATAAAATGGCTCTTTCTTTTCACTGGTGTAACTTCCGTGCCATTGACTTCAGCCCACCATCCACTTTTCCTTAG  
GGATGACAGTTGTATCGTCTTCAAAGACATACATTACGAATCGTTCCAATTTTTTCCATGTTGGATTTATATGTTTGGTTCCTTGAGAACGCGCTC  
ATTATTGATGTGCGCAAGGAAATTTGGAATATTTCAAGGTAAGAGTCTAGGTTTTCCGGATCTCTGAAGTATTGAGCAGGTACGAGACGAGATTGG  
ACAAAGGTTGACCAGGTGTTGGATCGCAAAAAGGTTTGGAGCACCGCGACAGAGGAAATCGGCAGGACCACAGGCTTGGAAAGGCAGAAATGCCGT  
TGTGTTGGGAACCGAAGGTCAGGAGAGAGCGGATGGGTGGAGCATTCAGCGGGATATGTAACCGCGCAAGAATTTGGCCGCCTGGGAGAATCC  
AATTGCGTCGACGGCGGGCGGTTAGAGAGAATAGGATGGGAGGCGAGGCTTTCGACAGCTTTTTCGATTTGAACTTGGTAAGAGAGTTAGTAT  
GGTATTTAAAGGAAAAATAGGGGATGTACTCACGAGTGAGATTTCCAAAGAAGGTAGCTGTCTATCTGCAGATGCATCCTCATCTACATGAAT  
ATTATAGACAAAAAGTCCCAGGATGAATAGCTTTCAGCTAGTTTTTCCAACTTGCAGCAAGACCATCCGCTTTGTAATTTATCGCCGAGTCCATGCCAG  
ATAATCAAGGGAAGTGGAGTATCAT

>Bcin16g03460(MLST7), partial sequence [organism=Botrytis cinerea, strain N11\_S\_E10]  
TCTTCATGAACCTCTTAATTTGAACTCTTCATTAATTTGCAAGTGATGAACCCCTATTTCTGCCAGAGGATAGTTACAAGACGTATATCATTAG  
TCGAGAACCACCTCATGATATACATTGACGGATTTTTGAAAGCGAATGAAAGTAAACACTTGGTTGATGTTAGGTGTGTTATTTATTTCTGATGAA  
ATGAACAAGAGAGACTGATGAGATAGTGAACCGCTTTATGAACCGTCTACTGTTTCTCACGGACAGGAAGTTACCATTTGATCCTTCGGTTTCGAA  
ATTCTGAAGTGGCGGTTTTAGAGAGGGATGAGGTGGTCAAGGTGATTTGAGCATAGAGCGAGGGCATTTTCAGGGGTGGAGGGGCGAGATGGGGAT  
TGAGAAGTTGAGGACGCGAGAGGTATGGGGTTGGAGGACATTATGGGATGCATTTGTAAGTTTTGGGGGATGACGAAGGCCCTCTGTTTATTTTC  
TATCAGTACGGATCTTGAAGAAAAGATAGCATGAACACGAGGGCTAATAACTAGGAAATAGCGATTGGAGCGGAGGTAACGTTGGCATAGACCG  
ATTTAGTACTTTTCAATGGTCTATGTGACGATCTCTCTGATATCGAAGGTGGAGGAACGGAATTTCCACGATTTGTGGGACCAAAAGGAGGAAGG  
TGGGAGGACTTCTTGGAAACTACGGAAAGCATTTGGATCCAAGAAGTGGAGAAAATGTAACAGTAGAAGGGGTGACATTTCAAACCAATCAAGGGAA  
ATGCCGTATTCT

>Bcin12g03020(MLST8), partial sequence [organism=Botrytis cinerea, strain N11\_S\_E10]  
ACTGCGCAGCACCGAGTCACCAAAAGCACGAATAAACCATCGGCAAGGGAAATATTTCTCTGAACCACAACATGACACGAGCGCGGAAGAGTATA  
TCGGGCGAGAAGCTTCATCAAGAGCACCAAAAGCGACAACGAGTCGATGATAAATTATAACTCTTACGGTGGAAAGAAATGAGAATACAGCAGCTTA  
TGCTTCCGGGAAACTTCCATCTGGAAGTATAAATGTTGGTGGAGGTAGGAAGACCACATTTCAAGAAGAACCCTCGAACGGCATTTGTGCTGCTGGC  
AAGTTGCCCCCTGGAAGTATCAACATTTGGTGGAAAAGAGGCTACCCAAATCGAGGACGAGGGTAGAGCAGCTTATGCTTCCGGAAAATTTGCCCC  
CAGGAAGTATAAACTCTGGCGCAAAGAAGGCGATTTTCATTTCCAAAGATGAAACGAGACCGGCTTATGCTCTGGAAGCTTCCACATGGTAGTAT  
CGACGGTATGCGAAACCGTGAATGGCTGCCGTCCACCGCGAAAATGCTGAGGGTGGGAGGAAACCAGGCCAGGTTGTCTCTTCTCTATTTCACA  
TTCAATCTACTTCAAAGAAAATTTTCGATGAACCCGAAAGCAAGCGGAACCGGCAAAACCATCCAATGCACCTTTGACAGAGGAAATGGCGA  
CTTTACCAATCTAGGGTTATCGAGAAGGCTTGCAGCCCATCTATCGACTAACTCGATATGAAAGCCCCGACCGCCATTTCAAAGGATCTGT  
GCAGCAGTTGGTATCGGACGATAGCGATGCTTTCATACAAGCAGAGACTGGATCTGGAAAAATTTGGCATATCTACTACCTATAGTCGAGCGA  
ATATTAGCATTGAGTGAGAATGGCGTACA

>Bcin02g07770 (MLST9), partial sequence [organism=Botrytis cinerea, strain N11\_S\_E10]  
CGTCACGATTGGGAAGGTGTAATTGTCTGGCTCTCAAGCGCCACCGCCACAACCTGCCGACAACATCTTAGCCGTTTGTCTTCCGCCCACGGAG  
GCTGGGATTGTTCCACCGATGGCTATTCCCTTTCTGGTACCAGCCCTCTTATCAAGTACGAAAAGTATCTGGCCCGTCGATCATTTCAATGGGTCT  
TACTAGTACTGTTGGTGGAAAACAACCTATGATTGCTTGGGAGTCTTTACCAACTGCTGCTCAAACCTGCTCTTGAGAACACCGATTTCCGGTGTCT  
GCGAATGTTCCATTCATTCGCGCTGTTTTACAGATAATCTTGCGAAAAGCTACTTTCTAG

>Bcin04g02090 (MLST10), partial sequence [organism=Botrytis cinerea, strain N11\_S\_E10]  
AACTGTCGAATCTGACTATGAATGATGTTTACAAGCCCTACATCCATGTAAGAAATGTAGAATAGAGAGATCAGTAACTGGAACATAATATCGTT  
TGCAGGCTTTCAAGTTACTTACGCAGTTCAACCCAATCACTACAGCTATTGCCGAATCCCCACTATTTCAAATGGCTGTCTCAGCAAATACCAT  
CGAAAAGTACACACTGCTAGGCCCTTTCTTTCAGAAATATCTCCTCTGCAACAGGAAGTTACCAGGGAATACTTCAGTGCGCCAAAGACGATAGAT  
AGGCGACACATTGCCACATCTCAAGATGCCCTTACGATTGACCTTACAAAACCCATCAAAAAGATTTACTTGATATCATCAACCACCTTTGTTCCGAG  
CAAGTCCAATCGCCAAAAGCAAAACCTGGATTGGTTCGCCTACATTGTGAATCAAAAATCACAAGCGTCGAGCACTTCAGGTAGACCCGAAAGA  
AGTGTCTTCTGATGGTTTTATGCACAATGTCACTGTCGTTCTAGATGGTCTTTGTGAGCCATTCATGGATAACACATTTCTCAAAAATTTCCGAAG  
ATTGATATTGATTATCTAAGACGTGCGCCTCGTGTAGATATCAAGGACGAGACCAAGTTGAACGCTGATGAGAAGGCTTCTGAGAAGTATTATG  
AGGACACTGTTCTTGGCACTTCTAATTTTCATCTCTGAGGTCTTCTTTCTGACATTGG

>Bcin01g07220 (MLST1), partial sequence [organism=Botrytis cinerea, strain N11\_S\_E15]  
GGTGTGAAGTATCTGGCGGATAGAGACCAATGAGCAGAGCAGCTATTGTAGATTTTCCGGAGCCGGAGGGTCCGACAAGTGCAGTTGTTGAGTT  
AGGAATCAGGGAAAAGAGAAAAGGATGATATCGTTCGTTTTTTCAGGACGAGTAGGGTATGTGAATGAAAGACGGTTGAATTTGATTGGAAAGATT  
GTCGAAAAGCCGTTCCGGTCTTTATTTTCTGTTGGGAGGAAGATGAATCGAGATTGGCTAATGCAAGCATATGCGTAGCTGTAACGCGAGAAGAGT  
TGATTTGTGGTATCATGGCCAGCATATTCGTAATAATAGAAAATACCAAATAATAGAAAGATTGACAGTCTGTAGTGCAGCCGCGATACTGATCTC  
TCTCTTGGTAATGAGAACCGTGGCATAATAAAAAGATAGTTGCAGTGATGAAGAATGACATTCGATCTGTCAATCCCCACAGCAATCCCGAGTAG  
TTTGCTCGTATTAGTCCAACCTTTATAGAGTTCTTCTGTAGCTTTGGTGTGTTTTGTCTTAAAGTAAAGTTTCCAGAGTAAAAGCCCGAACCACCTT  
TGATGTTGGAGAAAAGTCTCTGAAAATATGCCAGTGGTCATTTTCAGATGCGTAGTTGCACCTTGTTTTTCCCATTTTCCACTCACGCGATTGAACGT  
TTTTGGTGCAGCGTATATAACTGGCCAGTTGCCATTGAGACTAATGTCAAGTTTCCATGTATTACGAAAAGCCCAAATGATTGATATCAATAGC  
ATAAAAATGCTGTGAATACAATACCAGCAAAGCGGCCAACGAGATTACGCATTTCTCAGAGTTCTTATCCAAAACCTTCG

>Bcin05g07690 (MLST2), partial sequence [organism=Botrytis cinerea, strain N11\_S\_E15]  
AGGATGCCCTTCTCTCTACGACAGCAAGCCTTCGATGATATGTTGTGGGTAGTTCTTGGCTGGCTGGATACTGTCAAATTCATTGATTTACATTC  
TGAATTGCACTATTCAAACGACTCTCAGCCAGAATGGTACGACACAATATAAACCTGCATTTGCACATCGAGCGGACTATTTTGGGAATTG  
GCTTACAAGGATGGGATACTACTCTCTGTGGTGGTGGGATGATATGGTCACCATACTTACTCCATACAAGAACGCAATTTACCAATGAACCTCT  
ATATCGCAGCTTCGATATCGATGTACCTATATTTCCCCGGAGATGACAATCAATCCCCATTTATGCTTTCCAACCCCTCATATCCACCTCACGA  
TCCGAAATATCTACAGGCACTGTTGATGCTTACAAATGGCTGAATGGTTCCAACATGACGGATTTACAAGGATTATATGTCGACGGGTACCAT  
ATCTCGAATCTTTCTGGCGGTGAAAACACCCATTGCGATTCTAGAAATGAGATGGTATATACCTACAATCAAGGTGTTTTGCTTACTGGACAAC  
GTGGTTTTGATGACGCAACCGCCGACGATCATACCTTGTAGATGGCCACAACTCATCGGAATGTTATTAATGCCACAGGCTATGACCTGAA  
ACACAATGTTGTCATCTCACCGCCACCCAAAAGATGGTTCCGCATTGGCAAAGTGGTTTTGGCTGGGTAGGAATGGAATACTGGAAGAAGGATGC  
GATTCAGTGCTTCGTGTTCTCAAAAATGGACAAACTTTCAAAGGCATATTTCTTTCATCACTTGATTGCGTTCTGTAGTGATTTGCCAGGGGAGC  
CTATTGCAGGGACGAAGGAAT

>Bcin06g01710 (MLST3), partial sequence [organism=Botrytis cinerea, strain N11\_S\_E15]  
AGCTTCGGAAGCGTCTTCCGAGAGGAATTTGCCAGTCCCGATAGTCGGTTACGAGTCCACTCTCTGAAAACCTGTTGCGAAGATAACTTGGTGT  
TATGGACAGTGCATCGATCAGATCTTTGCGTTTCTTGACATATAGACAAGAAGCGTCGAAAATTTGTCAGAAGCCATTTGTGCATGTTTCATATCG  
AAGGAATGAAAATGCTGGAAAAGACGATGTTAGATGATGGTATTCAGGGCAAACCAAAGCTGCACCTGCATAAGCAGCATCGACGTGAACCCAGA  
TCTCGCCTGCAACATCTGGAGGTGCATATTTTGAAGTACTGTTGCAATAGATGCGAAGTCTCAACTGCGCATGTAGATGTTGTTCCCAAAGT  
CGAAGTTAGATAGAAGGGTTCCAATCCTTGAGATTTGCATTTCTTCAATACCTTCTCTAAATCATCACCCGTCATGGCGAAATCATTTGGATGCG  
AGTACTGGAATCGATCGGAATCTAACGCCAGCTATTTGCGCTGCTTTCTGCGTGGAGCTGTGTGCCATTTCCGCTTCTTAGTGCAACTAGCTTAC  
TCTCTTATATGCAATCGCATCCTCGAGTTCAATGCCCCGACAGACCTTCAGTAGTTTACGAAAGATATTTATCGCGGGCAGCAACCATAACGGT  
AACGATAGCTTCCGAGGCTGATCCTTGGATGACACCACCACCATGAGTCAAGACAAAATAACAGTCTGGGAGATTGAGAAGCTTGGCCAGCCAA  
TCCATTACAACCGTCTCCAATTTCTGTACAGCAGGGGAACAGATCCAATTTGAAAGCAGGTGCTGTGAAAGCTGCTGAGTATAATTTCTCCAGCA  
TTCCAGGGTAGGTAGATGATGCAGGGAAGAACGCCATGAAATTAGGTGATTGCCCTTG

>Bcin09g03030 (MLST4), partial sequence [organism=Botrytis cinerea, strain N11\_S\_E15]  
GCAGAGAGAGTCTTGGAGGAGGTGCGCAAGAGTTGGAAGAATAGGAGTGGCGGTGTCATTTGTCGAGGGCGAGGGAACGGAATTTGAAGGAGATTC  
TGAAAAGCTTTGGAAGGGAAATATGAGTGGTGGAAAGGATAGTCATAGGAAGAGAGCTAAGCCGGCAGAATAGTTTAGTACTGGGATCATCAATA  
TGGAGAGGTCAATCATACAAGACTTGGGCTACGGCCAGGGAATATACCCAGAGAGGATAGTCAAGTCTTGGGAATGTCAACGTTGGAGGTC  
AATGACGAGGAAGATGAGGATGGCCTGATGGATCCAAGAAGGTGGTTAAAAGTCATTTGATGCATTTGAGCAACCTCGACTGGTGTACAATGTTG

CTAAAAAGCACTTTGATAGGTATGTTTCAATGATAAAAATTCATCTGAATCGACTAAGTACAGTACAGAGATACCTCCAAACCTTCATTGTTCCCA  
ACCTGCGTCTCATAAAACACTCCTCTTCCAAAACCGCTATAATGTTATCCATCAACGTCTCCTTCGCAATGAATCTTTTCAAACGCCCGCTTTT  
CAAGGTGGCAAATCTTCCCTTCAACGCAGCACGTCCGCCATTACCACCCAACAACAATCATACAAAATTAACGCCGATAGCTAATCTTCTCGGTC  
GCAATCGCAGCTCTCATATGCTTCTCGGTCTCCTCAGTATTTACCCCACTGGTACCCTCGCCATCAATGACCTG

>Bcin11g01310 (MLST5), partial sequence [organism=Botrytis cinerea, strain N11\_S\_E15]  
TCATGTGGACCGGCGTAGAATGCGCAACGCTTGAAGTTCGCTCGAATATGGCGATGCAACGTCACGGCAAAGCCAGTGTGCGCTTGCTCG  
TTATCCTGCCACTGTTGCCGCGAGCAAGAGCTCGGGTCTCTCTTGATAAAATCCCGGTGGACCCGGTGCCTCTGGTGTGGCTTTGTGCAGTCT  
GGAGCCGGTGCCCGCTCTCGACACTGAGTGGTGGATTGTACGATATCATCGGATGGGATCCACGTGGAACCGGTGCTTCGGCTCCTATTTTGG  
AATGTTTTGCAAATGCCAGTGGGAGTATGATTTTAAACAACGCGTTTCCATCTGCTCCGAATCTCTGGCTCGGACAATTTGCGAATGCCAGCGC  
AAATTCTGCTGTTAGCTCTGCTATCACATCCTTTGACACTTCTGTGCTGCTCTTGCAAAAAGCTTGCGTGGCTCAGAAAATCTCCCGCTCTTTAC  
ACCTCAACAGCAGCATATGTTGCTCGAGACATGGCAGCGATAGTGCATGGATGGGACCTCTGCAAAAACCTTAACTACTGGGGTTTCTCAT  
ATGGAATATTTTCTAGCTGAGTTTATCCAACTTTCCAGCCGCGTGGGAAGAGTCTTGGCCGATGGTGTTCGACGCAAAGGCAAATGC  
ACTCACATACGTTAGCCAACCTTCCAACGATCAACTCAGTGTTCGTGCTTCGTTGAACGATTTTGCAGCTTTCTGCACCACCGCCGGTAGTAA  
GGTTGCTCTTTTGGCACC GCCCTACTGGAACCACAGGTAAGTGTGCTACCAGACTGGACAACATAATGAAGGATATG

>Bcin15g03910 (MLST6), partial sequence [organism=Botrytis cinerea, strain N11\_S\_E15]  
TCTTTGAAAGCCTTCTCTAGCATCTCCTCTCCTAACGTCATATGTCCCCCTGGAATGGTTTCGAAAACATAATTTTCCGGCTCATCCCAATGTC  
TTTAAACCTAGCCAATCTTCTTTATAAAATGGCTCTTTCTTTCAGTGGTGTAACTTCCGTGCCGTTGACTTCAGCCCACCATCCACTTTCTT  
GGATGACAGTTGTATCGTCTTCAAAGACATACATTACGAATCGTTCCAATTTTTCATGTTGGATTTATATGTTTGGTCTTGAGAACGCGCTC  
ATTATTGATGTGCGCAAGGAAATTTGGAATATTTCAAGGTAAGAGTCTAGGTTTTCCGGATCTCTGAAGTATTGAGCGGGTACGAGACGAGATTGG  
ACAAAAGGTTGACCAGGTGTTGGATCGCAAAAAGGTTTGGAGCACC GCGACAGAGGAAATCGGCAGGACCACAGGCTTGGAAGGCAGAAATGCCGT  
TGTGTTGGGAACCGAAGGTCAGGAGAGACGGATGGGTGGAGCATTGCAGCGGGATATGTAACCACGCAAGAATTGGCCGCCTGGGAGAATCC  
AATTGCGTCGACGGCGGGCGGTTAGAGAGAAATAGGATGGGAGGCGAGGCTTTCGACAGCTTTTTCGATTTGAACCTGGTAAGAGAGTTAGTAT  
GATATTTAAAGGAAAAATAGGGGATGTAATCAGGAGTGAATTTCCAAAGAGGTAAGTGTCCATCTGCAGATGCATCCTCATCTACATGAAT  
ATTGTAGACAAAAGTCCCAGGATGAATAGCTTTCAGCTAGTTTTTCCAACCTTGGCGAAGACCATCCGCTTTGTAATTTATCGCCGAGTCCATGCCAG  
ATAATCAAGGGAAGTGGAGTATCAT

>Bcin16g03460 (MLST7), partial sequence [organism=Botrytis cinerea, strain N11\_S\_E15]  
TCTTCATGAACCTCTTGATTTGAACTCTTCATTAATTGCAAGTGATGAACCCCTATTTCTGCCAGAGGATAGTTACAAGACGTATATCATTAG  
TCGAGAACCCTCATGATATATATTGACGGATTTTGAAGCGAATGAAAGTAAACATTTGGTTGATGTTAGGTGTGTTATTTATTTCTGATGAA  
ATGAACAAGAGAGACTGATGAGATAGTGAAGCGCTTTATGAACCGTCAACTGTTTCTCACGGACAGGAAGTTACCATTGATCCTTCAGTTCCGA  
ATTCTGAAGTGGCGGTTTTAGAGAGGGATGAGGTGGTCAAGTGTATTGAGCATAGAGCGAGGGCATTTTCAGGGGTGGAGGGGCGAGATGGGGAT  
TGAGAAGTTGAGGACGACAGGATATGGGTTGGAGGACATTTATGGGATGCATTTGTAAGTTTGGGGGATGACGAAGGCTTCTGTCTATTTTC  
TATCAGCACGGATCTTGAAGAAAGATAGCATGAACACGCGGGCTAATAACTAGGAAATAGCGATTGGAGCGGAGGTAACGTTGGCATAGACCG  
ATTTAGTACTTTTCATGGTCTATGTGACGATATCCTCTGATATCGAAGGTGGAGGAAACGGAATTTCCACGATATCGTGGGACCAAAGGAGGAAG  
TGGGAGGACTTCTTGAAACTACGGAAGCATTGGATCCAAGAAGTGGAGAAAATGTAACAGTAGAAGGGGTGACATTTCAAACCAATCAAGGGAA  
ATGCCGTATTCT

>Bcin12g03020 (MLST8), partial sequence [organism=Botrytis cinerea, strain N11\_S\_E15]  
ACTGCGCAGCACCAGTACACAAAAGCAGCAATAAACCATCGGCAAGGGAATAATTTCTCTGAACCACAACATGACACGAGCGCGGAAGAGTATA  
TCGGGCGAGAAGCTTCATCAAGAGCACAAAGCGACAACGAGTCGATGATAAATATAACTCTTACGGTGGAAAGAAATGAAAATACAGCAGCTTA  
TGCTTCCGGGAAACTTCCATCTGGAAGTATAAATGTTGGTGGAGGTAGGAAGACCCTTTTCAAGAAGAACACGAACGGCATTGTCGCTGGC  
AAGTTGCCCCCTGGAAGTATCAACATTGGTGGAAAGAGGCTACCCAAATCGAGGACGAGGGTAGAGCAGCTTATGCTTCCGGAATAATGCCTC  
CAGGAAGTATAAATCTGCGCAAAGAGGCGATTTTCATTTCCAAGATGAAACGAGACCGGCTTATGTCTCCGAAAGCTTCCACATGGTAGTAT  
CGACGGTATGCGAAACCGTGAATGGCTGCCGTCCACCGCGAAAATGCTGAGGGTGGGAGGAAACCAGGCCAGGTTGTCTCTTCTCTATTCACA  
TTCAATCCTACTTCAAAGAAAATTTTGGATGAACCCGAAAGCAAGCGGAACCGGCAAACCATCCAATGCGCCTTTGACAGAGGAAATGGCGA  
CTTTACCAATCTAGGGTTATCGAGAAGGCTTGCAGCTCATCTATCGACTAACTCGATATGAAAGCTCCGACTGCCATTTCAAAGCATCTGT  
ACAGCAGTTGGTATCGGACGATAGCGATGCTTTCATACAAGCAGAGACTGGATCTGAAAAAATTTGGCATATCTACTACCTATAGTCGAGCGA  
ATATTAGCATTGAGTGAGAATGGCGT

>Bcin04g02090 (MLST10), partial sequence [organism=Botrytis cinerea, strain N11\_S\_E15]  
AACTGTCGAATATGACTATGAATGATGTTTACAAGCCCTACATCCATGTAAGAAATGTAGAATAGAGAGATCAGTAACTGGAACATAATATCGTT  
TGTAGGCTTTCAAGTTACTTACGCAGTTCAACCCAATCACTACAGCTATTGCCGAATCCCCACTGTTTTCAAATGGCCGCTCAGCAAATACCAT  
CGAAAAGTACACACTGCTAGGCCCTTTCTTTCAGAAATATCTCCTCTGCAACAGGAAGTTACCAGGGAATACCTCAGTGCGCCAAAGACGATAGAT  
AGGCGACACATTGCCACATCTCAAGATGCGTTACGATTGACCTTACAAACCCATCAAAAAGATTTACTTGTATATCATCAACCACCTTTGTTTCGAG  
CAAGTCCAATCGAAAAAGCAAACCCCTGGATTGGTTTCGCTTACATTTGTAATCAAAAATCAAGCGTCGAGCACTTTCAGGTAGACCCGAAAGA



CACTCACATACGTTAGCCAACCTTCCCAACGATCAACTCAGTGTTCGTGCTTCGTTGAACGATTTTGCAGCTTTCTGCACCACCGCCGGTAGTAA  
AGGTTGCTCTTTTGCCACCGCCCTACTGGAACCTCAGGTACTGTTGCTACCAGACTGGACAACATAATGAAGGATATG

>Bcin15g03910 (MLST6), partial sequence [organism=Botrytis cinerea, strain SA12\_Ro]

TCTTTGAAAGCCTTCTCTAGCATCTCCTCTCCTAACGTCAATATGTCCTCCCTGGAATGGTTTCGAAAACATAATTTTCCGGCCTCATCCAATGTCT  
TTAAACCTAGCCAATCTTCTTTATAAATGGCTCTTTCTTTTTCAGTGGTGTAACCTCCGTGCCGTTGACTTCAGCCCACCATCCACTTTCTTAGG  
AATGACAGTTGTGTCTCTTCAAAGACATACATTACGAATCGTTCCAATTTTCCATGTTGGATTTATATGTTTGGTTCTTGAAGACGCGCTCA  
TTATTGATGTGCGCAAGGAAATTGGAATATTCAAGGTAAGAGTCTAGGTTTTCCGGATCTCTGAAGTATTGAGCGGGTACGAGACGAGATTGGA  
CAAAGGTTGACCAGGTGTTGGATCGCAAAAGGGTTTGTAGCACCGCGACAGAGGAAATCGGCAGGACCACAGGCTTGGAAAGGCAGAAATGCCGTT  
GTGTTGGGAACCAAAGGTGAGGAGAGCGGATGGGTGGAGCATTGCAGCGGGATATGTAACCACGCAAGAAATTGGCCGCTTTGGGAGAATCCA  
ATTGCGTGCAGCGCGGGCGCGGTAGAGAGAATAGGATGGGAGGCGAGGTTCTCGCAGACCTTTTTCGATTTGAACTTGGTAAGAGAGTTAGTATG  
ATATTTAAAGGAAAAATAGGGGATGTACTCACGAGTGAGATTTCCAAGAAGGTAGCTGTCTATCTGCAGATGCATCCTCATCTACATGAATA  
TTGTAGACAAAAGTCCAGGATGAATAGCTTCAGCTAGTTTTCCAACCTTGCAGCAAGACCATCCGCTTTGTAATTATCGCCGAGTCCATGCCAGA  
TAATCAAGGGAAGTGGAGTATCAT

>Bcin16g03460 (MLST7), partial sequence [organism=Botrytis cinerea, strain SA12\_Ro]

TCTTCATGAACCTCTTGATTTGAACTCTTCATTAATTGCAAGTGATGAACCCCTATTTCTGCCAGAGGATAGTTACAAGACGTATATCATTAG  
TCGAGAACCACCTCATGATATATATTGACGGGTTTTTGAAGCGAATGAAAGTAAACATTTGGTTGATGTTAGGTGTGTTATTTATTTCTGATGAA  
ATGAACAAGAGAGACTGATGAGATAGTGAGCCGCTTTATGAACCGTCAACTGTTTCTCACGGACAGGAAGTTACCATTGATCCTTCAGTTCGGA  
ATTCTGAAGTGGCGGTTTTAGAGAGGGATGAGGTGGTTCAGGTGTTTGTAGCATAGAGCGAGGCGATTTTCAGGGTGGAGGGGCGAGATGGGGAT  
TGAGAAGTTGAGGACGCGAGGATGGGGTTGGAGGACATTATGGGATGCATTTGTAAGTTTTGGGGGATGACGAAGGCTTCTGTCTATTTTTCT  
TATCAGCACGGATCTTGAAGAAAAGATAGCATGAACACGCGGGCTAATAACTAGGAAAATAGCGATTGGAGCGGAGGTAAACGTGGCATAGACCG  
ATTTAGTACTTTTCATGGTCTATGTGACGATCTCCTCTGATATCGAAGTGGAGGAACGGAATTTCCACGTATTGTGGGACCAAAAGGAGGAAGG  
TGGGAGGACTTCTTGAAACTACGGAAGCATTGGATCCAAGAACTGGAGAAAATGTAACAGTAGAAGGGGTGACATTCAAACCAATCAAGGGAA  
ATGCCGTATTCT

>Bcin04g02090 (MLST10), partial sequence [organism=Botrytis cinerea, strain SA12\_Ro]

AACTGTCAAATATGACTATGAATGATGTTTACAAGCCCTACATTCATGTAAGAAATGTAGAATAGAGAGATCAGTAACTGGAACATAATATCGTT  
TGTAGGCTTTCAAGTACTTACGCAGTTCAACCCAATCACTACAGCTATTGCCGAATCCCCACTGTTTCAAATGGCCGCTCAGCAAATACCAT  
CGAAAAGTACACACTGCTAGGCCCTTTCTTTCAGAATATCTCCTCTGCAACAGGAAGTTACCAGGGAATACTTCAGTGCGCCAAAGACGATAGAT  
AGGCGACACATTGCCACATCTCAAGATGCGTTACGATTGACCTTACAAACCCATCAAAAAGATTTACTTGATATCATCAACCACCTTTGTTTCGAG  
CAAGTCCAATCGAAAAAGCAAAACCCCTGGATTGGTTTCGCTACATTTGTGAATCAAAAATCACAAGCGTCGAGCACTTCAGGTAGACCCGAAAGA  
AGTGTCTTCTGATGGCTTTATGCACAATGTCACTGTCTGTTCTAGATGGTCTTTGTGAGCCATTCATGGATACCACATTTCTCGAAAAATTTCGAAG  
ATTGATATTGATTATCTAAGACGTGCGCCTCGTGTAGATATCAAGGACGAGACCAAGTTGAACGCTGACGAGAAGGCTTCTGAGAAGTATTATG  
AGGACACTGTTCTTGGCACTTCTAATTTCACTCTCTGAGGTCTTCTTTCTCACATTGG

>Bcin01g07220 (MLST1), partial sequence [organism=Botrytis cinerea, strain SAS405]

TCAATGATTGTTTTGCCGACCCAAGTATCTCTCCTTCTTGATCTCGAATCGGCGTGTCTCTTCCAGTATGGAATTTCTACCTCATCGTAACCA  
GGAATTTCTAATACCCAACCCACCTTTGTGAGCATCGCTACTAGCGTTACTACTAGCCTCTCCAGCATCATTTCTCTTCCCTTCAGCACCACTTTAT  
CCCCCGAATCATCTCTAATAAAGTCTGAAATTTCCCTTCGACTTTATTTCTTCAACTCATCGAAACCAACCACTCTCAACTATCTCTCCCTCTTC  
CATCACACGACTCGTCCCGCTATCTTCATCATTTTCAGCCGTATGACTAACAACCAGCGTGGCCATTCCTTCTCTCTTCTTCAACTTCTGCACA  
GTCTCTCTTATCACCTCTGCACTACCACCATCTAATCCACTCGTCGCTTCATCTAATATCAATAAAGTTGGTTTTCTGACCAGTGTCTTTGATA  
TCACAATTTCTTGGGCTGTCTCCCGATAACTCTTGTCTCCATCTCCTACCATAGTATCATAACCTTTGTGGAAGCGATGTGATAAATTCATG  
GATCCCAGCATCTTTTGTGATGCAATAGCAGATGGAAGACTAGCACAAAGGAGAAGATTCTGGGAGACCATAAATGATGTTATGGAGAATGGTA  
GCTGGAATAAGAATCGGTATTTGTGGAACGAGTGAGAGAGAAGCCCGGAGAGACGGAATGTGACAGTTACTTATGGAGACGCGATTGAATGTCA  
ACGGTGGAGGTGTTGAAGTATCTGGCGGATAGAGACCAATGAGCAGAGCAGCTATTGTAGATTTTCCGGAGCCGGAGGGTCCGACAAGTGCAGT  
TGTTGAGTTAGGAATCAGGGAAAAGAGAAAAGGATGATATCGTTTCGTTTTTTCAGGACGAGTAGGGTATGTGAATGAAAGACGGTTGAATTTGATT  
GGAAAGATTGTCGAAAAGCCGTTCCGGTTCCCTTTATTTTTCGTGGGAGGAAGATGAATCGAGATTGGCTAATGCAAGCATATGCGTAGCTGTAACGC  
GAGAAGAGTTGATTTGTGGTATCATGGCCAGCATATTCGTACTATTAGAAATACCAAATAATAGAAGATTGACAGTCTGTAGTGCAGTCCGAT  
ACTGATCTCTCTTGGTAATGAGAACCCTGGCATAATAAAAAGATAGTTGCAGTGTGAAAGATGACATCGCATCTGTCAATCCCCACAGCAAT  
CCCGAGTAGTTTGTCTGATTTAGTCCAACCTTTATAAAGTTCTTCTGTAGCTTTGGTGTGTTTTGTCTCAAAGTAAGTTTCCAGAGTAAAAGCCC  
GAACCACTTTGATGTTGGAGAACGTTCTCTGAAAAATATGCCAGTGGTCAATTCAGAGGCGTAGTTGCACCTGTTTTTCCATTTTCCACTCACGCG  
ATTGAACGTTTTGGTGACAGCGTATATAACTGGCCAGTTGCCATCGAGACTAATGTCAGTTTCCATGTATTCACGAAAGCCCAAATGATTGAT  
ATCAATAGCATAAAAAATGCTGTGAATACAATACCAGCAAAGCGGCAACGAGATTACGCATTTCCCTCAGAGTTCCATCCAAAACCTTCGTTCA  
ACCGGCTAGGTGAATTTCTGGATTCTTCAAACCATGACTTCGGTTGTGCGAGAATCTTCTTTAGTGTCTTACACGCAGAGCACTAACCCAAGC  
TTGTCCAGCACGTTCCAAAGCATAATGCGAAAAGAAAACAAGATATGCCATCAATGATGGCGATTCCGAGTAAGACAAGTGACCATTTTAAAGCA  
TTCGAGTTGCGGTTCTCTTTTGGTAAAAAGTGTCAAGAAGTTTGGTATATATATATAGCAAAAGCTGGGGTTGATACTGCCACAATAAATGCTG



```
CGGCAAATGCAACCGAAAGGATTGTGCGTTCCCTTCTTGTTCAGCATGGGCCAAACAGTCTTTAAGATCTTAGTTAAAGTATCGGGTTTGAGATG
ACCCGTTTCGTTCTTCTTTCAGAAATCGCCCGCATATCAGCAGAGTCATCTGAGTGTCCAACAAAGAATCCATAGGCGGACTTTAGAGTCT
CGATTCTTTTCGATTGATACCAAGCTGAGAGGGCTTTGAATCAGAGGTTTTCTATCAAAGCTTGGCTTGTCTGAGGGATGTTCTGGGATCGATT
GGAATCCTGCGTCTTGATACCTTGGTGGCCTGATAGGATGTATAGACTGCCTACTAGCCGACTCTTGGAACTTCTGAAACTGTGAGGTAGGTCT
TTGCAAATCATCAAACCTTGAACGTGAACTGTCAATCCAGATGTCCAAATGTTGTCTGATTGTAGGTCAATGGCATAGGCTATTGAAGCATAT
CCAAGAGATAATCGTCTGTTTATATCAAGGACCTACGATTTGCTGCATTTGGACCATAGATTGTAGACTTGGTAGAGAAACGAGGTTTCA
ATTCTTGAACAAAGTCTTCAAAGCTTCCAGTTAATGGTGTCCAGGGTCCGAGTTTTCTTCTGATGTTGGACAAGTCTGTGACTGTTCAACGGG
CAATCCCGGGAGTTGCGAAAATGTAGCGAAAAGTACCGTTTTGCTTTCGCGAAAAGCTTCTTACGATATCCTTCTGGACAACCTTACTCTGATCC
ATAACGTAAACGTAGTCATCATCCAATATCTGGGAAATATCATGAGTCACAATAATTGTCGTTTTTCCCTTCCCTCCATTCTCGAATATTATCCA
TGATTTTGAGTCGGTGGTTCAGATCAAGAGCACTAGTTCCCTTCGTCAGAATCAAGATTGGTGCATCTCGTAATCTAGCTCGTGCCAAATGCAAC
ACGTTGTTTTTGTCCACCCTCAGTTGTCTCTCCTTAGAGCCAAATCATAGTATCAAGTCCATCAGGAAGATCGGCAATTACTTGTCTTAGATTG
GCTGTAGAACAGGCGTCTATGATATCAGCTTCATTTTTTATTCTCCCTTGCCAAATCTATGTTTTTCCCTAACCGTCTCGTTGAATACCACAC
TCTGCTGCAGTACGAGAGTGTGTTGCTCTCAGCCAATCGGTATCGAGATCCTGTATACGTTGGCCATCTATCAAGATACTTCCCTCCTGTGG
CTCGTAAAATTTGAGCAACAAGTTTCCCAATGTACTCTTCCAGAACCACTTTTACCAACTACAAAAGTAGTCTCGCCAGCAGGAAAGAAGAAT
GTTGTTTTTGTAAAGAGCATTGTGCTGTGATTGGAAGGATATCCAAATGTAACCTGATCTTGATTAGTCTTGATGGTTTTATCGTGGCCATCTCT
ACTTACATTATTGACTTCTATATCACCGTTGCAGGTTTTAGGTACCATTAACCTTCTGGGTGTTTTGCAACTCCTCCTCTATTCACTTGGTTC
ATGATAGACTTGAGAGTGCCTCCAGCGGACATTCCTTTTGTAAAGACAAGCCATTGTGGTAAAACGACTTCTATAGCCATCATCCCAGTCAAAC
AAGCATAGAAAAGTTGTAAGAACCTTCCGGCATCTAGTCCATGATCGACTAACGTGAGACCATACCCAAAGCCTTGAACAAAGATGGCCACCAT
GACAAATTTGGTAATCCCAAATGAAATGCATTTGACCTGGCTTGGATCATGTAATGAACTGTTGATTTTTTGTATTGCTAAGAAGTATTGCCAA
ACTTCTGGTCTGTCCGTTGAATGCTTTGACAGTATCGATGGCTGTAATGGCTGTAATTTGTAAATTTGCAAGCTTGCATAGCTCTCTTTTCT
GGGCTTCGATGGCTGGGCCCATGTTTCTAGAAAATTAGATAAAGTATTCCACCGGCAATTTGAAAATGTCGCTATAATGACAAGAGTCAGATTCCA
AGAGTAAAAGAAGGCAGTCCCAAGAGCTGCACATGCGCTAGCAGTTTCAAACAAGAGAAAACCAAGAGGCTGGGATGTGGATAAATGGAGCTCT
CGAATTTGTCTATTGTTCAATCAGTATGTTTTTCAATTCGACCATAAATGGATTCACACACGTTTTCAATTCGAATTAATAATGATCCAATGCCA
TCTCTACGCAGATCAAACCATTCCAAATCCTTCTCCAACATGCCGGCAAACATTTTCTCGCGCAGCTTCTAGCCTGGAGCTCTCCAAATACCA
TCCACGAACACAGAAAACAAGCCTTCGAACAACCATACTGCGCCCCGAGAACAGTTATAGCTATGCACCATTTCGAGACATGTTGTAAGGTCTC
TTGTGCGGTGAGAACACCCGACCCAAAATTTGTAAGAGTACCAAATATATTTCCGTAATAATTTGCCGATATAGGTTTTAGAACGCCGCTAATG
ATTGCAAATACTATACATGGAACCTATGGTAGATATGTGCTTTTTTGGTTGTGAATGTGAATAGGGATTTGAAAGATGATTTGATTTCTTCATCGG
CGTGGTAGTCATTGATATTTGCAATTCGATGGACGAAATCTGATCATCATCTGGCAATCGGATGCGTGAGGTAGAAGTAGAATGACTGTATTT
TTTTGTGACTCTTCGAGCCTTTGCTTTTCAATATTGTTCAT
```

>Bcin05g07690 (MLST2), partial sequence [organism=Botrytis cinerea, strain SAS405]

```
ATGATTTTCGTTCTCAACACAGATCAATCCACGACCGGTATATCTTTGCTACTGCTGTGCTTATTCTGCGCACTATCTTTCTCAATTGGCGTAG
ATGGGAGGCCCAACGATGTTGTGCGACAGAATGATTTGATTCAACGACCCTTACGAAATAATGAAGATATCACAATCAATGGGAGCCCTCAGGA
GCTCATCAAGCCTGGAGACTCAAAGGTTCTACCGGCAATGTTAAGCGCGCTGGACGTGCTACAAGAAGACTACTTTGCGACATGGCAAGGCATC
TATCCAACAGGAATCGATTGGACATCTGCAGTATTGGTACAATACTTTCTTTGCTGTTGAAACCACTTTAGAGCAAGAGCTAACACCCTCT
CTAAACAGGCACCTATGTTGCTGGTGCCTCACCCTATCACCAGTCTTTTCTGCACTTTCCCTCATCAAAAACGAACGAGAATCATCAAT
AAATACTTTGCTGAAGTAATTTGGGTTTTATTTTTGGCCAGGATGCCTTCTCTACGACAGCAAGCCTTCGATGATATGTTGTGGGTAGTTCTTG
GCTGGCTGGATACTGTCAAATTCATTGATTTACATTTCTGAATTGCACTATTCAAACGACTCTCAGCCAGAATGGTACGGACAACAATATAAACC
TGCAATTTGCACATCGAGCGGACTATTTTGGGAATTTGGCTTACAAGGATGGGATACTACTCTCTGTGGTGGTGGGATGATATGGTACCATAAC
CTTACTCCATACAAGAACGCAATTAACCAATGAACTCTATATCGCAGCTTCGATATCGATGTACCTATATTTCCCGGAGATGACAATCAATCCC
CATTTATGCTTTTCCAACCCTTCATATCCACCTCAGATCCGAAATATCTACAGGCAGCTGTTGATGCTTACAAATGGCTGAATGATTTCCAACAT
GACGGATTTACAAGGATTAATGTGACGGGTACCATATCTCGAATCTTTCTGGCTGTGAAAACACCCATTGCGATTCTAGAAAATGAGATGGTA
TATACCTACAATCAAGGTGTTTTGCTTACTGGACAACGTGGTTTTGTATGACGCAACCGCCGACGATCATACCTTGTAGATGGCCACAACTCA
TCGCGAATGTTATTAATGCCACAGGCTATGACCTGAAAACAAATGTTGTTCATCTCACCGCCACCCAAAGATGGTTCCGCATTTGGCAAAGTGGTT
TGGCCTGGGTAGGAATGGAATACTGGAAGAAGGATGCGATTCAGTGTCTCGTGTCTCAGAATGGACAAACTTTCAAAGGCATATTTCTTTTCAT
CACTTGATTGCGTCTGTAGTGATTTGCCAGGGGAGCCTATTGCAGGGACGAAGGAAAGCTTAGAACTCGACAGAGTGTGGCATTTCTGACAAAT
GCTCACAGTATACAAAATGGATCAGGCGAAATGCCGAAAGCTGCGTTAAGTACCAAGAAATGAAGAAGGGAAATTTGGTATGTGGTGGGGTGTACC
GGCTACACAGAGTCTTTTAGCGGACTATACACAGGACCAGACATCGAGAGGCTCTGTAGATTATCGAAATACTGGAGTTCCAAAGAACACCGAA
TGGAGAGGAGAAGAATACCCAGAGAAGCGAAAGCGAGCAGGACTAAAGAAGGCGCAGATGTATATAGTGGGGTAGAAGATCCCAATGATCGAG
GTAGAGGAAGAACGGTAGAAACTCAGGGTGGAGGATTGTCTGTCTTGTAGAGCATTATGGGAGGTAGAGCTGAGATGA
```

>Bcin06g01710 (MLST3), partial sequence [organism=Botrytis cinerea, strain SAS405]

```
CTAGCTCTGATTTGGTAATCCATTCCATTAAACAACAGCGACTTCACCACACCCCTCCGCCTTCTTATTCATAACAACCCCTTTGAGATTTCCC
CGCTTGCTCGCTTTCCCATCCCGGACCTCTTTCAGTTCGATCAACTAGGATATCAAAGCTTTGCGGATATAAATTTCTTCCGCCTTGGGATTCG
CACTCACGACTCGGATTACATATGCACCCGCCACCACGCCAGCTGTGAGATAGATTTTCGCTTCGTTTGTAAATCAGCTCGTAGACTTCTTTTCGT
GAGACTATTCTGTGCATCCGCATTTGTGGATTGGGAACAATGTTTCAAGACAGTGAAGGCGAAATTTGGGCCCTGTAACATATATTGAATAGATCT
TCTCGTGTCTTGTAGCAGGCTGACAAGTAATTTCTCGAGCTTACGTGCTTTCCGATGTGCTCTTGTAGGCCCTTGACTCCGTAGGTTCTGAGGA
```

```
CAAACCAAATCTTTAAGCTTCGGAAGCGTCTTCCGAGAGGAATTTGCCAGTCCCGATAGTTCGGTTACGAGTCCACTCTCTGAAAACCTCGTTGCC
AAGATAACTTGGTGTATGGAGAGTGCATCGATCAGATCTTTGCGTTTCTTGACATATAGACAAGAAGCGTCGAAAATTTGTCAGAAGCCATTTG
TGCATGTTTCATATCGAAGGAATGGAAATGCTGGAAGGACGATGTTAGATGATGGTATTCAGGGCAAACCAAAGCTGCACCTGCATAAGCAGCAT
CGACGTGAACCCAGATCTCGCCTGCAACATCTGGAGGTGCATATTTGAAAGTACTGTTGCAATAGATGCGAAGTCGTCAACTGCGCATGTAGA
TGTTGTTCCCAAAGTCGAAGTTAGATAGAAGGGTTCCAATCCTTGAGATTTGCATTTCTTCAATACCTTCTCTAAATCATCACCCGTCATGGCG
AAATCATTGGATGCGAGTACTGGAATCGATCGGAATCTAACGCCAGCTATTTGCGTCTCTTCTGCGTGGAGCTGTGTGCCATTTTCGCTTCCCTA
GTGCAACTAGCTTACTCTTATATGCAATCGCATCCTCGAGTTCAATGCCCGACAGACCTTCAGTAGTTTTCACGAAGATATTTATCGCGGGC
AGCAACCATAACGGTAACGATAGCTTCCGAGGCTGATCCTTGATGACACCACCACCATGAGTTCGAAGACAAATAACAGTCTGGGAGATTGAGA
AGCTKGSACCAGCCAATCCATTACAACCGTCTCCAATTTCTGTACAGCAGGGGAACAGATCCAATTGAAAGCAGGTGCTGTGAAAGCTGCTGAGT
ATAATTTCTCCAGCATTTCCAGGGTAGGTAGATGATGCAGGGGAAGAACGCCATGAAATTAGGTGATTGCCCTTGGTATATCAGTGTCTATCTTAAC
GCTCAAAATACAAAAGTCAGACTCACCAATGTGTGACAGCCAGGCATAATTTAGATTCGATATCTTTCTGGATCTCTGCCCATGATTCACCCCTCT
TCCGGTGGACCATCTGGAAGAATCTTCTTCAGGTAACCAGGCTCGACATTTGAAATTACTCTTCGTTTCATGAATGTTATCATAATATTGGATGA
CTATGCTGGTCAGTATACAGTACTTCATCTTGGGAAGCAGGAACCTACTTTTCGTCGAATCGCCGACGTCGCCGCCCTCCCTAAACTGCTTCGAATC
CAT
```

>Bcin09g03030 (MLST4), partial sequence [organism=Botrytis cinerea, strain SAS405]

```
ATGGCTCSCCTCAATCCCACAACGAAATCAAAAGCCCCCTCCGCTCTTCAGGCCTCTGCTACCCCCGCTACAAATTCGAATCCTATCCCCCAT
CATCGCCTGCATTTGCAACTCCGGTACATCCTATACGACCCTTCAACCCACCCGAGCTCCTATACCGAAAGCGAGTATCCTACCAATTCCTCT
TCCACCTGCGACTTTAAGACCATTGGCTTTCCGCACTTTTCAAAAAAGCATAGTTTAAACATTCAGCTCGTCGGCATTACAAGTGTGGCTACT
TTTATTGGAAGCATTGTGGACAGGATGGAGGGAAGAAGGACTGGCAGAGAGAGTCTTGGAGGAGTTCGCCAAGAGTTGGAAGAATAGGAGTG
GCGGTGTCATTGTGAGGGGCGAGGGAACGGAATTTGAAGGAGATTCTGAAAGCTTTGGAAGGGAATATGAGTGGTGAAGGATAGTCATAGGAAG
AGAGCTAAGCCGGCAGAAATAGTTTAGTACTGGGATCATCACAATATGGAGAGGTCAATCATAAAGACTTGGGCTACGGCCAGGGAATATACCC
AGAGAGGATAGTCAGTCAAGTTTGGGAATGTCAACGTTGGAGGTCAATGACGAGGAAGATGAGGATGGCCTGATGGATCCAAGAAGGTGGTTAA
AAGTCATTGATGCATTTGAGCAACCTCGACTGGTGTACAATGTTGCTAAAAAGCACTTTGATAGGTATGTTTCAATGATAAAAATTTTATCTGAA
TCGACTAACTCAGTACAGAGATACCTCCAAACCTTCATTTGTTCCACCTGCGTCTCATAAAAACACTCCTCTTCCAAAACCGCTATAATGTTATC
CATCAACGTCTCCTTCGCAATGAATCTTTTCAAAACGCCCGCTTTTCAAGGTGGCAAATCTTCCCTTCAACGCAGCACGTCGCCCATTACCACCC
AACAAACATCATACAAATTAACGCCGATAGCTAATCTTCTCGGTTCGCAATCGCAGCTCTCATATGCTTCTCGGTCTCCTCAGTATTTACCCAC
TGGTACCCTCGCCATCAATGACCTGACGGGCGATATCGCTCTCGATCTTACACACGCAGCAGCCATTTCCGAAGATAGCGCGTGGTTTTGCCCT
GGGATGATGGTACTCGTAGACGGCAGTACGAGGAAGATGAAACTGGGACGTCATCTCGTCTTGGTGGAAATGGGGGCGTAGGGGGTACTATTT
CTGGAAAATTTGTCGGCTTCTTCATCGGCCACCCCTCCCCCGAACGCCGTCATGTGACTTTAGGCACAGCCGGTGGAGGAGATACCACAGCCGG
CGGTGGTTTTGGCTGGGTAGACTTCTTAGGCGTGGGTAGTTCTCGCGCCCTAGGCAACAAAATGCAACGACTGGAACAAAAGCTTCTCCGACCC
CCTCCCCCTGACACAGATACAGATGATCCCCCGCTCCATCCAGAGCCGTGTAGTCAATCTTGGTGTATGATCTCGACATTTCTCAAATC
TTCAAGCCCTCAAAAAGATTCTCTCTTATACTCATCTGAACCAGAAAGGCTGCACACCTATGACCTTTATCCTCCTCGGCTCTTTCGTTCTCA
TGCCGTAAGTCTGGCTCGGGGCGGRTCGGGAGGCTCTATAGAATATAAAGAGTATTTTGATTCCTTGCAGCCGTTCTCTCTGAATACCCCTACCATC
TTAAGTACAGCAACATTCATATTTATCCCTGGCCCCAACGATGCATGGGTTTTCAGCTTCTCATCCGGGTCTACTGTTCCCTGCCCAGAAAAC
CCGTACCGGAAATGTTACATCCCGCATAAAAAGTGCCTTTGCAAAACGCAAAACTGAAATGGAGAAAAGAACACGGTAATAAAGGAGATGGAGA
GGCCATTTGGACGAGTAATCCTGCAAGAGTCAGTTTATTTGGCATGAGCTGTGAACTGGTAGTATTCGCGACGACGTTAGCGGACGATTGCGT
CGTACAGCTGTTACTCAAGTCATCTCAAACGTCAAACCTGAAAACGAAGATGAAGATATAGATATGTCACCACCTCCATCTTCAATTCCTCT
CTTCCACCCCTCCTCCAGAAATCGATCCCGATATCCACACCGCGCTGCTTACCAGGACACTCCTCGATCAGGGACATCTTTACCCCTTTCC
TCTAAACATCGCACCCCGCAGATTGGGATTTCTCAAATGCGTTGAGCATTTATCCATTGCCAACAGCAATTTGTTATGTGCGATGTAGATAGCCCG
GCATTTTGGCTTGACGTACGAGGGGTGTCATGTAATGAATCCAGCGAGTGTAGTAGCAAAGGGGAGAAGAGGCGTAGCGAGATGGATAGAGTATG
ATGTTTGGGGACGGCTGGGAAGGTCAGAGAGGTGGGATTTTAG
```

>Bcin11g01310 (MLST5), partial sequence [organism=Botrytis cinerea, strain SAS405]

```
ATGCCTTCCATTAGCAGCATTTCTAGTCGCCACTGTCAATTTGTCGGTCTTGTGAATGGACTGACATGGACCTCATGTGGAACCGGCGTAGAAT
GCGCAACGCTTGAAGTTCCGCTCGAATATGGCGATGCAACGTCAACGGCAAAGCCAGTGTTCGCTTGCCTGTTATCCTGCCACTGTTGCCGC
GAGCAAGAAGCTCGGGTCTCTTTGATAAATCCCGGTGGACCCGGTGCCTCTGGTGTGGCTTTGTGTCAGTCTGGAGCCGGTGCAGCCGCTCG
ACACTGAGTGGTGGATTGTACGATATCATCGGATGGGATCCACGTGGAACCGGTGCTTCCGGCTCCTATTTTGGAAATGTTTGGCAAATGCCAGTG
CGGAGTATGATTTTAAACAACCGGTTTCCATCTGCTCCGAATCTCTGGTCTCGACAAATTTGCGAATGCCAGCGCAAATTTCTGCTGTTAGCTCTGC
TATCACATCCTTTGACACTTCTGTGCTGCTTTCGAAAAGCTTTCGCTGGCTCAGAAAATCTCCCGCTCTTTACACCTCAACAGCAGCATATGTT
GCTCGAGACATGGCAGCGATAGTCGATGCATTTGGATGGGACCTCTGCAAAAACCTAACTACTGGGGTTTCTCATATGGAACATATTTTCCCTAGCTG
AGTTTATCCAAAACCTTTCCAGCCCGGTTGGGAAGAGTTCTTGCCGATGGTGTGTTTCGACGCAAAGGCAAATGCACCTCACATACGTTAGCCAAC
TCCCAACGATCAACTCAGTGTTCGTGCTTCGTTGAACGATTTTTCAGCTTCTTCGACCACCGCCGGTAGTAAAGGTTGCTCTTTTGCACCAGCC
CCTACTGGAACACAGGTAAGTGTGCTACCAGACTGGACAACATAATGAAGGATATGTTCCCTCAATCCTATTTGTTGCTTCGGGCTTAAAGCATCA
GCTTAGATATCCTCAGTCCCTTCTTGCATCTCTTCTTAGAGTTCCAACCACGTGGAAAACGCTTGCATCTGTCTTATCCGGTCTTGAACCTCG
TGACGCAACTGCTCTTATTTCACTCCTTGGATCGCTAGCAGCAGTGCACCAACCGACGGCTCTGCAGCAGGCGTTGGCAGCTCTTGCCTACTTAC
CCTTGGTGTGTTGATAACGCTGCTTCAAATGGAGTTACTTGGACACTGTCATTTCTCTCACAAAAGCATCTCAATCTCCGAAGACACCC
```

CAATACTAAATGCTGGACTTATCCCCATAACATTTTGTGCGCAACTTCCCTTCCACGCGTCCGCTTGTTCCAAACGTAGGAGCAAGTTTGATGTC  
GAAGACCGATACTCTTCTCGCAACAGCCAAAACACCAATCCTCATTTGTCTCGGCCGAGAATGATCCAACAACCCCTCTCAAGTCTGCAAAAAGCA  
CTCCGAAGCCTACTCCCTAGTTTCATCCACCCTCGTATACCCGCGGAGGAAGCGGACACACCACCATCTCACACGCATCTCTCGGAATGGCAAAAG  
CGATCTCTAATTTCTTTGTGTCAGCGGTACCATGCCCAAGGACGGAGCTCGATTTGTCAGTGGACCAGAATATTTTCCCAACAGCTGCAGCGAGTGG  
TTTAGTTACACCAGCTGCTTTCAACGGAACCTATTCTACACAAGATCAAAGTTTCCCTAACCGCAACATACAACATTGGCATTGCCCTTCTTAGCA  
ATCGCATAA

>Bcin15g03910 (MLST6), partial sequence [organism=Botrytis cinerea, strain SAS405]

TTACAACTCCTCCTCGTGTCCGTCATCTGGGCTTGCTTCTCCCAAATTTCTTCCCTGCTGGACCAAAATACTCTTTGAAAAGCCTTCTCTAGC  
ATCTCCTCTCCTAACGTCATATGTCCCCCTGGAATGGTTTTGAAAATAAATTTCCGGCTCATCCAATGTCTTTAAACCTAGCCAATCTTCTT  
TATAAATGGCTCTTTCTTTTCAGTGGTGTAACCTCCGTGCCGTTGACTTCAGCCCACCATCCACTTTCCCTTAGGGATGACAGTTGTATCGTCTTC  
AAAGACATACATTACGAATCGTTCCAATTTTTCCATGTTGGATTATATGTTTGGTTCTTGAGAACGCGCTCATTATTGATGTCGGCAAGGAAA  
TTGGAATATTCAAGGTAAGAGTCTAGGTTTTCCGGATCTCTGAAATTTGAGCGGGTACGAGACGAGATTGGACAAAGGTTGACCAGGTGTTGG  
ATCGCAAAAGGGTTTGGAGCACCGGACAGAGGAAATCGGCAGGACCACAGGCTTGGAAGGCAGAAATGCCGTTGTGTTGGGAACCGAAGGTGAG  
GAGAGAGCGGATGGGTGGAGCATTGCAGCGGGATATGTAGCCACGCAAGAATTGGCCGCCCTTGGGAGAATCCAATTGCGTGCAGCGCGGGCGCG  
GTAGAGAGAATAGGATGGGAGCGAGGCTTTCGACGACCTTTTCGATTTGAACTTGGTAAGAGAGTTAGTATGATATTTAAAGGAAAAATAGGG  
GATGTACTCACGAGTGAGATTTCCAAAGAAGGTAGCTGTCTATCTGCAGATGCATCCTCATCTACATGAATATTGTAGACAAAAGTCCCAGGA  
TGAATAGCTTCAGCTAGTTTTTCCAACCTTGCGCAAGACCATCCGCTTTGTAATTTATCGCCGAGTCCATGCCAGATAATCAAGGGAAGTGGAGTAT  
CATCTTCATCGTTGGATGATTTTTGTGTTTTGGCGAGTCTTTCCGGACAAGGTGAGGTTGAAAATACTTGGAAAGAGGACTGTTTTTTATCGTAGAC  
AGAGGCATGTTTCATCATGCGCGACGGGAAATTCAGAACACTCTCAGGCATAACGATAGCGTTGATGAGCGATGCGCTGCTGAGCAACGAGATA  
ATTTTGGTAATGGGCGCCAT

>Bcin16g03460 (MLST7), partial sequence [organism=Botrytis cinerea, strain SAS405]

ATGCTTATTTACGCTTTTCGATTGATACCTCTTTACGTCTTAGTATGGGTGCCTCTTTCTCAAGTAATCTACGGTCGTCATCTGCTCTTCATG  
AACCTCTTAATTTGAACTCTTCATTTATTTGCAAGTGATGAACCCCTATTTCTGCCAGAGGATAGTTACAAGACGTATATCATTAGTTCGAGAACC  
ACTCATGATATATATTGACGGATTTTTGAAAAGCGAATGAAAGTAAACATTTGGTTGATGTTAGGTGTGTTATTTATTTCTGATGAAATGAACAAG  
AGAGACTGATGAGATAGTGAGCCGCTTTATGAACCGTCAACTGTTTCTCACGGACAGGAAGTTACCATTGATCCTTCAGTTCGGAATTTCTGAAG  
TGGCGGTTTTAGAGAGGGATGAGGTGGTCAAGTGTATTTGAGCATAGAGCGAGGGCATTTTCAGGGGTGGAGGGGCGAGATGGGGATTGAGAAGTT  
GAGGACGCAGAGGTATGGGGTTGGAGGACATTATGGGATGCATTTGTAAGTTTTGGGGGATTGACGAAGGCTTTTGTCTATTTTCTACCAGTAC  
GGATCTTGAAAAGAAAGATAGCATGAACACGAGGGCTAATAACTAGGAAATAGCGATTGGAGCGGAGGTAAACGTGGCATAGACCGATTTAGTAC  
TTTCATGGTCTATGTGACGATCCTCTGATATCGAAGGTGGAGGAACGGAATTTCCACGTATCGTGGGACCAAAAGGAGGAAGGTGGGAGGAC  
TTCTTGAAAATACGGAAGCATTTGGATCCAAGAACTGGAGAAAATGTAACAGTAGAAGGGGTGACATTTCAAACCAATCAAGGGAATGCCGAT  
TCTGGGAAAATACTGACAACAACGGGAGGGGCTATGATGAAAACATGGCACGCTGGTCTACCCGTTGGAAAAGGCTCGAAAAGTAGGGTTGAATAT  
TTGGAGTTATGGGAGGACCATTAGATGA

>Bcin12g03020 (MLST8), partial sequence [organism=Botrytis cinerea, strain SAS405]

ATGGCCGACGATGGAATGCTGATGAAATTTTGGAGATTGGGGATGTACCTATTGTTGCGAAACAAGCATTTAAAGGAGGACGTTGGAAGGATCGAT  
TGGCTGCGAAGAAAATGCGCAGCACCGAGTCACAAAAGCACGAATAAACCATCGGCAAGGGAAATATTTCTCTGAACCACAACATGACACGAG  
CGCGAAGAGTATATCGGGCGAGAAGCTTCATCAAGAGCACCAAAGCGACAACGAGTGCATGATAAATATAACTCTTACGGTGGAAAGAAATGAA  
AATACAGCAGCTTATGCTTCCGGGAAAATTTCCATCTGGAAAGTATAAATGTTGGTGGAGGTAGGAAGACCCTTTTCAAGAAGAACCACGAACGG  
CATTTGTCGCTGGCAAGTTGCCCCCTGGAAGTATCAACATTTGGTGGAAAGAAGGCTACCCAAATCGAGGACGAGGGTAGAGCAGCTTATGCTTC  
CGAAAATTTGCCCTCCAGGAAGTATAAATCTTGGCGCAAAGAAGGCGATTTTCATTTCAAAGATGAAACGAGACCGGCTTATGCTCTCCGAAAAGCTT  
CCACATGGTAGTATCGACGGTATGCGAAAACCGTGAATGGCTGCCGTTCCACCAGGAAATTTGCTGAGGGTGGGAGGAAACCAGGCCAGGTTGTCT  
CTTCTCTATTACATTTCAATCCTACTTTCAAAGAAAATTTTGGATGAAACCCGAAAGAACAAAGCGGAACCGGCAAACCATCCAATGCGCCTTTGAC  
AGAGGAAAATGGCGACTTTACCAATCTAGGGTTATCGAGAAGGCTTGCAGCCCATCTATCGACTAAACTCGATATGAAAGCTCCGACCGCCATT  
CAAAAAGCATCTGTACAGCAGTTGGTATCGGACGATAGCGATGCTTTTCATACAAGCAGAGACTGGATCTGGAAAACCTTTGGCATATCTACTAC  
CTATAGTTCGAGCGAATATTAGCATTTGAGTGAGAATGGCGTACAAAATACATCGAGATTTCTGGACTTTTTTGGCATTTATCTTTTCACCTACAAGAGA  
ACTGTGCAAAACAAATCGCGGCTGTGCTGGAGAAAAGTTTTACGTTGTGCGCCATGGATTGTTGGTACGACCGTTAACGGAGGAGAGAGTAAGCAA  
TCAGAAAAGGCTAGACTTCGAAAAGGTTGTCATATTTCTTGTGCAACACCTGGTTCGATTAGCAGATCATCTCGATAACACAGAAGTGTGTAATG  
TAGCTACTGTAAGATGGCTAGTGTGGATGAAGGAGATAGATTAATGGAGCTTGGGTTTCGAGGAAGAGATTAAGGCATCGTTGAGAAGATAGG  
TCGAAGATCAGTGGCCAAAAGCAAATTCGGACATGGGGTCACTCCCGAAAACGAAGAGTTACTATCTTATGTTCTGCTACGATGAAGATGAATGTT  
CAGCGTTTTGGGAGAAAATCAGTTTTAAAGGATGCTGTGCACATTTCAAGCGGATCCTTCCGAACAAGAGAAAACAAGACAAGGAAAATGGCGTTGAAG  
CCCAAGATAAAGCTTTCTCCGCCCTACGCAATTTGAAGCAGTCATATGCTATCGTTCTTGCAGAGCTCAGACTTGTACCTGACGGCTCTATT  
GAAACGTGCTTTTTGCACGAAAAGGGTCCGTGATGAAGGCGATCGTTTTTCATTTCTTGTGCTGACTCTGTTGACTTTTCACTTCTCGCTCTTCTCT  
CGTACCCCAAGAGCTTCAGCCGAGGTTGTGGACGAGGAGAAAGGTTGATCTTCCCGCATTACCAAAATCAGAATTTGGTCAAAGAGACTATTGGCG  
ATGGAACATCAATTTGCAATAATTTCAAACCTGTAATTTCTACACAACTTCACGGATCTTTCGACAAAACATCAGAACAGCAACCCCAAGGC  
ATTTTCCGAATCTGCGGACCCTTGTGTTATGATATGTAATGATGTTGCATCTCGAGGTTCTGATCTTCCAAATGTCGACTTTTGTCTATCGAGTAT

GACCCGCTTTTAGCGCGGAAGATCATCTACATCGTGTGGTTCGAACAGCCAGAGCTGGTTCGCGAGGGTCTGTGCTTTGATCTTCCTTATGCCTG  
GCGTCGAGGAGGAATATGTTTCTATCTTAGCATCCGGATACCGTGAAGGAAAAGAAAGCTCTGACACGTACACTGCTGAGGATTTGATACAAAA  
GGGTTTCGGTGGTATAGGTTCGGAATGGGAAGAGAGAGCTACGAATTTCCAACCTGAAAGTTGAACGATGGAGTTTGGACTCGCCAAAATATCTT  
GAGATGGCACGCCGTGGATACCAGAGTCATATCAGGGCTTATGCCACTCACGTTCGCAAATGAGAGACACATATTCATATGCAAGAATTGCACT  
TGGGTCATTTGGCCAAAGCATTGCTTGCAGACAAAACCTGGAAGCATTAAAGTGCCAGGATTAAGACCAGCGAAGATGACCAAAGCAGATCG  
AAGTGTTCGCGCTAGGAAGGCGAAGAGGGGTGAGAAAAGCAGAAGATAAAGCTCCCGAGGGAGAAAGAGTGCAGAAACAAAAGAAGATGGAGCTG  
GACTTGCTACTGTGGATGGCAATGAAGCTGCCGCGAGGATGAAGAGGAAGATGAAGGAGCATATGGCTGCTGCGAGCGAGTTCAATATTTGGTT  
GA

>Bcin02g07770 (MLST9), partial sequence [organism=Botrytis cinerea, strain SAS405]  
ATGGTTGCCTTCTCAAAAATCATTACAGCTTTCCCTTTTCGGTCTTGGCATCTACAGTCATTGCCATCCCTACACCATCACAACTTGAGTCTCGGG  
CCGTTATCGATTCCGATGCCGTTGTAGGATTTGCCGAAACTGTTCCAGTGGGACCGTAGGAACAGTTTATGAGGCATATAAAACCATTCCCTTAA  
AGTCGTAAATGGATGCGTACCATTCCCTGCCGTCGATGCATCGGGTAAACACAGGGTATGTCTTATATCTTTCTCTTCCACACGATTGCTATTG  
AGTCTCTAACATATTTTAGTGGTGGTTTGTACCAACTGGCAGTAGCAATGGTGGTTGCAGCAGCAGTACCAGTCAAGTATATGTTTCGAGGAGG  
ACAAAGCGGATCAAACTACGCCATCATGTACTCTGGTAAAGTTCTCTCTAAACTTCTCTTATAGATCCAACCTAACAAAATCTTAGGTACATG  
CCAAAGGACGAGCCCTCAACCGGTATTGGTCACCGTCACGATTGGGAAGGTGTAATTGTCTGGCTCTCCAGCGCCACCGCCACAACCTGCCGACA  
ACATCTTAGCCGTTTGTCTTCCGCCACGGAGGCTGGGATTTGTTCCACGGATGGCTATTCCCTTTCTGGTACCAGCCCTCTTATCAAGTACGA  
AAGTATCTGGCCCGTCGATCACTCAATGGGTCTTACTAGTACTGTTGGTGGAAAACAACCTATGATTGCTTGGGAGTCTTTACCAACTGCTGCT  
CAAACCTGCTCTTGAGAACACCGATTTTCGGTGTGCGAATGTTCCATTCAATCCGGCTGTTTTTCACAGACAATCTTGCGAAGGCTACTTTCTAG

>Bcin04g02090 (MLST10), partial sequence [organism=Botrytis cinerea, strain SAS405]  
AACTGTGCAATATGACTATGAATGATGTTTACAAGCCCTACATCCATGTAAGAAATGTAGAAATAGAGAGATCAGTAACTGGAACATAATATCGTT  
TGTAGGCTTTCAAGTTACTTACGCAGTTCAACCCAACTACTACAGCTATTGCCGAATCCCCTACTATTTCAAATGGCTGTCTCAGCAAATACCAT  
CGAAAAGTACACACTGCTAGGCCCTTTCTTTCAGAAATATCTCTCTGCAACAGGAAGTTACCAGGGAATACTTCAGTGCGCCAAAGACGATAGAT  
AGGCGACACATTGCCACATCTCAAGATGCCCTTACGATTTGACCTTACAAAACCCATCAAAAAGATTTACTTTGATATCATCAACCCTTTGTTTCGAG  
CAAGTCCAATCGCCAAAAGCAAAAACCTTGGATTGGTTTCGCTTACATTTGTGAATCAAAAACCAAGCGTCGAGCACTTCAGGTAGACCCGAAAGA  
AGTGTCTTCTGATGGCTTTATGCACAATGTCACTGTCTGTTCTAGATGGTCTTTGTGAGCCATTCATGGATACCACATTTCTCGAAAATTTTCGAAG  
ATTGATATTGATTATCTAAGACGTGCGCTCGTGTAGATATCAAGGACGAGACCAAGTTGAACGCTGACGAGAAGGCTTCTGAGAAGTATTTATG  
AGGACACTGTTCTTGGCACTTCTAATTTTCACTCTGAGGTCTTCTTTCTCACATTTGG

>Bcin01g07220 (MLST1), partial sequence [organism=Botrytis cinerea, strain U10\_SC\_BR01]  
GGTGTGAAAGTATCTGGCGGATAGAGACCAATGAGCAGAGCAGCTATTGTAGATTTTCCGGAGCCGGAGGGTCCGACAAGTGCAGTTGTTGAGT  
TAGGAATCAGGGAAAAGAGAAAAGGATGATATCGTTTCGTTTTTCAGGACGAGTAGGGTATGTGAATGAAAGACGGTTGAATTTGATTGGAAAGAT  
TGTCGAAAAGCCGTTTCGGTTTCTTTATTTTCGTGGGAGGAAGATGAATCGAGATTGGCTAATGCAAGCATATGCGTAGCTGTAACGCGAGAAGAG  
TTGATTTGTGGTATCATGGCCAGCATATTTCGTACTATTAGAAAATACCAAATAATAGAAGATTGACAGTCTGTAGTGCAGTTCGCGATACTGATCT  
CTCTCTTGGTAATGAGAACCCTGGCATAATAAAAAGATAGTTGCAAGTATGAAGAATGACATCGCATCTGTCAATCCCCACAGCAATCCCCGAGTA  
GTTTGTCTGATTTAGTCCAACCTTTATAAAAGTTCTTCTGTAGCTTTGGTGTGTTTTGTCTCAAAGTAAGTTTCCAGAGTAAAAGCCCGAACCACT  
TTGATGTTGGAGAAAGTCTCTGAAAATATGCCAGTGGTCATTTTCAGAGGCGTAGTTGCACCTGTTTTCCCATTTTCCACTCACGCGATTGAATG  
TTTTGGTGACAGCGTATATAACTGGCCAGTTGCCATCGAGACTAATGTCAGTTTCCATGTATTTACAAAAGCCCAAATGATTGATATCAATAG  
CATAAAAATGCTGTGAATACAATACCAGCAAAGCGGCCAACGAGATTACGCATTTCTCAGAGTTCCATCCAAAACCTTCGT

>Bcin05g07690 (MLST2), partial sequence [organism=Botrytis cinerea, strain U10\_SC\_BR01]  
AGGATGCCTTCTCTACGACAGCAAGCCTTCGATGATATGTTGTGGGTAGTTCTTGGCTGGCTGGATACTGTCAAATTCATTGATTTACATTC  
TGAATTGCACTATTCAAACGACTCTCAGCCAGAAATGGTACGGACAACAATATAAACCTGCATTTGCACATCGAGCGGACTATTTTGGGAATTG  
GCTTACAAGGATGGGATACTACTCTCTGTGGTGGTGGGATGATATGGTACCATACCTTACTCCATACAAGAAGCAATTAACAATGAACCTCT  
ATATCGAGCTTCGATATCGATGTACCTATATTTCCCGGAGATGACAATCAATCCCCTTTATGCTTTCCAACCTTCATATCCACCTCACGA  
TCCGAAATATCTACAGGACGCTGTTGATGCTTACAAATGGCTGAATGGTTCCAACATGACGGATTTACAAGGATTTATATGTCGACGGGTACCAT  
ATCTCGAATCTTTCTGGCGGTGAAAACACCCATTGCGATTCTAGAAATGAGATGGTATATACCTACAATCAAGGTGTTTTGCTTACTGGACAAC  
GTGGTTTGTATGACGCAACCGCCGACGATCATACCTTGTAGATGGCCACAACTCATCGCAATGTTATTAATGCCACAGGCTATGACCTGAA  
ACACAATGTTGTATCTCACCGCCACCCAAAGATGGTTCCGCATTTGGCAAAGTGGTTTGGCTGGGTAGGAATGGAATACCTGGAAGAAGGATGC  
GATTCAAGTGTCTGTTCTCAGAATGGACAAAACCTTTCAAAGGCATATTTCTTTTCACTTGTATTGCGTTCTGTAGTGAATTTGCCAGGGGAGC  
CTATTGCAGGGACGAAGGAA

>Bcin06g01710 (MLST3), partial sequence [organism=Botrytis cinerea, strain U10\_SC\_BR01]  
AGCTTCGGAAGCGTCTTCCGAGAGGAATTTGCCAGTCCCGATAGTCGGTTACGAGTCCACTCTCTGAAAACCTGCTTGCAGGATAACTTTGGTGT  
TATGGAGAGTGCATCGATCAGATCTTTGCGTTTCTTGCATATAGACAAGAAGCGTCGAAATTTGTGAGAAGCCATTTGTGCATGTTTCAATCG  
AAGGAATGAAATGCTGGAAGGACGATGTTAGATGATGGTATTCAGGGCAAACCAAAGCTGCACCTGCATAAGCAGCATCGACGTGAACCCAGA

```
TCTCGCCTGCAACATCTGGAGGTGCATATTTTGAAGTACTGTTGCAATAGATGCGAAGTCGTCAACTGCGCATGTAGATGTTGTTCCCAAAGT
CGAAGTTAGATAGAAGGGTTCCAATCCTTGAGATTTGCATTTCTTCAACACCTTCTCTAAATCATCACCCGTCATGGCGAAATCATTGGATGCG
AGTACTGGAATCGATCGGAATCTAACGCCAGCTATTTGCGCTGCTTTCTGCGTGGAGCTGTGTGCCATTTTCGCTTCCCTAGTGCAACTAGCTTAC
TCCTCTTATATGCAATCGCATCCTCGAGCTCAATGCCCCGACAGACCTTCAGTAGTTTTCACGAAGATATTTATCGCGGGCAGCAACCATAACGGT
AACGATAGCTTCCGAGGCTGATCCTTGGATGACACCACCACCATGAGTCAAGACAAATAACAGTCTGGGAGATTGAGAAGCTTGGCCAGCCAA
TCCATTACAACCGTCTCCAATTTCTGTACAGCAGGGGAACAGATCCAATTTGAAAGCAGGTGCTGTGAAAGCTGCTGAGTATAAATTTCTCCAGCA
TTCCAGGGTAGGTAGATGATGCAGGGAAGAACGCCATGAAATTAGGTGATTGCCCTTG
```

```
>Bcin09g03030 (MLST4), partial sequence [organism=Botrytis cinerea, strain U10_SC_BR01]
GCAGAGAGAGTCTTGGAGGAGGTGCGCAAGAGTTGGAAGAATAGGAGTGGCGGTGTCATTGTGCGAGGGCGAGGGAACGGAATTGAAGGAGATTC
TGAAAGCTTTGGAAGGGAATATGAGTGGTGGAAAGGATAGTCATAGGAAGAGAGCTAAGCCGGCAGAAATAGTTTAGTACTGGGATCATCACAATA
TGGAGAGGTCAATCATAACAAGACTTGGGCTACGGCCAGGGAATATACCCAGAGAGGATAGTCAAGTCTTGGGAATGTCAACGTTGGAGGTC
AATGACGAAGAAGATGAGGATGGCCTGATGGATCCAAGAAGTGGTTAAAAGTCATTGATGCATTTGAGCAACCTCGACTGGTGTACAATGTTG
CTAAAAAGCACTTTGATAGGTATGTTTCAATGATAAAAATTTTATCTGAATCGACTAACCTCAGTACAGAGATGCCCTCCAAACCTTCATTGTTCCC
ACCTGCGTCTCATAAAAACACTCCTCTTCCAAAACCGCTATAATGTTATCCATCAACGTTCTCCTTCGCAATGAATCTTTTCAAACGCCCGCTTTT
CAAGGTGGCAAATCTTCCCTTCAACGCAGCAGTCCGCCATTACCACACAACAACAATCATACAAATTAACGCCGATAGCTAATCTTCTCGGTC
GCAATCGCAGCTCTCATATGCTTCTCGGTCTCCTCAGTATTTACCCACTGGTACCCTCGCCATCAATGACCTG
```

```
>Bcin11g01310 (MLST5), partial sequence [organism=Botrytis cinerea, strain U10_SC_BR01]
TCATGTGGAACCGCGTAGAATGCGCAACGCTTGAAGTTCGGCTCGAATATGGCGATGCAACGTCAACGGCAAAGCCAGTGTGCGCTTGCTC
GTTATCCTGCCACTGTTGCCGCGAGCAAGAAGCTCGGGTCTCTTTGATAAAATCCCGGTGGACCCGGTGCCTCTGGTGTGGCTTTGTGCAGTC
TGGAGCCGGTGGCCCGTCTCGACACTGAGTGGTGGATTGTACGATATCATCGGATGGGATCCACGTGGAACCGGTGCTTCGGCTCCTATTTTG
GAATGTTTTGCAAATGCCAGTGCAGGATATGATTTTAAACAACGCGTTTCCATCTGCTCCGAATCTCTGGCTCGGACAATTTGCGAATGCCAGCG
CAAATCTGCTGTTAGCTCTGCTATCACATCCTTTGACACTTCTGTGCTGCTCTTGCAAAAGCTTGCCTGGCTCAGAAATCTCCCGCTCTTTA
CACCTCAACAGCAGCATATGTTGCTCGAGACATGGCAGCGATAGTCGATGCATTTGGATGGGACCTCTGCAAAACTTAACTACTGGGGTTTTCTCA
TATGGAACATTTTTCTAGCTGAGTTTATCCAAACTTTCCAGGCCGCGTGGGAAGAGTTCTTGCCGATGGTGTTTTCGACGCAAAGGCAAATG
CACTCACATACGTTAGCCAACCTTCCCAACGATCAACTCAGTGTTCGTGCTTCGTTGAACGATTTTGCAGCTTCTGCACCACCGCCGGTAGTAA
AGGTTGCTCTTTTGCCACCGCCCTACTGGAACCACAGGTACTGTTGCTACCAGACTGGACAACATAATGAAGGATATG
```

```
>Bcin15g03910 (MLST6), partial sequence [organism=Botrytis cinerea, strain U10_SC_BR01]
TCTTTGAAAGCCTTCTCTAGCATCTCCTCTCCTAACGTCATATGTCCCCCTGGAATGGTTTCGAAAACATAATTTTCCGGCCTCATCCCAATGTC
TTTAAACCTAGCCAATCTTCTTTATAAAATGGCTCTTTCTTTTTCAGTGGTGTAACTTCCGTGCCGTTGACTTCAGCCCACCATCCACTTTTCTTAG
GGATGACAGTTGTATCGTCTTCAAAGACATACATTACGAATCGTTCCAATTTTTTCCATGTTGGATTATATGTTTGGTTCTTGAGAACCGCGTC
ATTATTGATGTGCGCAAGGAAATTTGGAATATTTCAAGGTAAGAGTCTAGGTTTTCCGGATCTCTGAAGTATTGAGCGGGTACGAGACGAGATTGG
ACAAAGGTTGACCAGGTGTTGGATCGCAAAGGGTTTGAGCACCGCGACAGAGGAAATCGGCAGGACCACAGGCTTGGAAAGGCAGAAATGCCGT
TGTGTTGGGAACCGAAGGTCAGGAGAGAGCGGATGGGTGGAGCATTGCAGCGGGATATGTAACCACGCAAGAATTTGGCCGCTTGGGAGAATCC
AATTGCGTTCGACGGCGGGCGGGTAGAGAGAAATAGGATGGGAGGCGAGGTCTTCGACAGACCTTTTCGATTTGAACTTGGTAAGAGAGTTAGTAT
GATATTTAAAGGAAAAATAGGGGATGACTCACGAGTGAATTTCCAAAGAAGTAGCTGTCTTATCTGCAGATGCATCCTCATCTACATGAAT
ATTGTAGACAAAAGTCCCAGGATGAATAGCTTCAGCTAGTTTTCCAACCTTGCGCAAGACCATCCGCTTTGTAATTTATCGCCGAGTCCATGCCAG
ATAATCAAGGGAAGTGGAGTATCAT
```

```
>Bcin16g03460 (MLST7), partial sequence [organism=Botrytis cinerea, strain U10_SC_BR01]
TCTTCATGAACCTCTTGATTTGAACTCTTCATTAATTGCAAGTGATGAACCCCTATTTCTGCCAGAGGATAGTTACAAGACGTATATCATTAG
TCGAGAACCACCTCATGATATATATTGACGGGTTTTTGAAGCGAATGAAAGTAAACATTTGGTTGATGTTAGGTGTGTTATTTATTTCTGATGAA
ATGAACAAGAGAGACTGATGAGATAGTGAAGCGCTTTATGAACCGTCAACTGTTTCTCACGACAGGAAGTTACCATTGATCCTTCAGTTCCGA
ATTCTGAAGTGGCGGTTTTAGAGAGGGATGAGGTGGTCAAGTGTATTGAGCATAGAGCGAGGGCATTTCAGGGGTGGAGGGCGAGATGGGGAT
TGAGAAGTTGAGGACGAGAGGATGGGGTTGGAGGACATTTAGGGATGCATTTGTAAGTTTTGGGGGATTTGACGAAGGCTTCTGTCTATTTTC
TATCAGCACGGATCTTGAAGAAAGATAGCATGAACACCGGGCTAATAACTAGGAAATAGCGATTGGAGCGGAGGTAACGTTGGCATAGACCG
ATTTAGTACTTTTCATGGTCTATGTGACGATCCTCTGATATCGAAGTGGAGGAACGGAATTTCCACGTATTGTGGGACCAAAGGAGGAAGG
TGGGAGGACTTCTGGAAACTACGGAAGCATTTGGATCCAAGAAGTGGAGAAAATGTAACAGTAGAAGGGGTGACATTTCAAACCAATCAAGGGAA
ATGCCGTTTTCT
```

```
>Bcin12g03020 (MLST8), partial sequence [organism=Botrytis cinerea, strain U10_SC_BR01]
ACTGCGCAGCACCGAGTACCAAAAAGCACGAATAAACCATCGGCAAGGGAAAATATTTCTCTGAACCACAACATGACACGAGCGCGGAAGAGTATA
TCGGGCGGAGAAGCTTCATCAAGAGCACCAAAAGCGACAACGAGTCGATGATAAATATAACTCTTACGGTGGAAAGAAATGAAAATACAGCAGCTTA
TGCTTCCGGGAAACTTCCATCTGGAAGTATAAATGTTGGTGGAGGTAGGAAGACCATTTTCAAGAAGAACCCTCGAACGGCATTTGTGCTGCTGGC
AAGTTGCCCCCTGGAAGTATCAACATTTGGTGGAAAGAAGGCTACCCAAATCGAGGACGAGGGTAGAGCAGCTTATGCTTCCGGAAAATTTGCCCC
```

CAGGAAGTATAAACTCTGGCGCAAAGAAGGCGATTTTCATTCCAAGATGAAACGAGACCGGCTTATGTCTCCGAAAGCTTCCACATGGTAGTAT  
CGACGGTATGCGAAACCGTGAAATGGCTGCCGTCCACCGCGAAAATTGCTGAGGGTGGGAGGAAACCAGGCCAGGTTGTCTCTTCTCTATTCA  
TTCAATCCTACTTCAAAGAAAACCTTTCGATGAACCAGAAACAAGCGGAACCGGCAAAACCATCCAATGCGCCTTTGACAGAGGAAATGGCGA  
CTTTACCAATCTAGGGCTATCGAGAAGGCTTGCAGCCATCTATCGACTAACTCGATATGAAAGCCCCGACGGCTATTCAAAAAGCATCTGT  
GCAGCAGTTGGTATCGGACGATAGCGATGCTTTCATACAAGCAGAGACCGGATCTGAAAAAATTTGGCATATCTACTACCTATAGTCGAGCGA  
ATATTAGCATTGAGTGAGAATGGCGTACA

>Bcin02g07770 (MLST9), partial sequence [organism=Botrytis cinerea, strain U10\_SC\_BR01]  
CGATTCCGATGCCGTTGTAGGATTTGCTGAAACTGTTCCAGTGGGACCGTAGGAACAGTTTATGAGGCATATAAACCATTCCTTAAAGTCGTA  
AATGGATGCGTACCATTCCCTGCCGTCGATGCATCGGGTAACACAGGGTATGTCCTTATATCTTTCTCTTCCACACGATTGCTATTGAGTCTCT  
AACATATTTTTAGTGGTGGTTTGTACCAACTGGCAGTAGCAATGGTGGTTGCAGCAGCAGTACCGGTCAAGTATATGTTTCGAGGAGGACAAAGC  
GGATCAAACACTACGCCATCATGTACTCCTGGTAAGTTCTCTCTAAACTTCTCCTTATAGATCCAACCTAACAAAATCTTAGGTACATGCCAAAGG  
ACGAGCCCTCAACCGGATTGGTCACCGTCACGATTGGGAAGGTGTAATTGTCTGGCTCTCCAGCGCCACCGCCACAACCTGCCGACAACATCTT  
AGCCGTTTGTCTTCCGCCACGGAGGCTGGGATTTGTTCCACGGATGGCTATTTCCCTTTCTGGTACCAGCCCTTTATCAAGTACGAAAGTATC  
TGGCCCGTCGATCACTCAATGGGTCTTACTAGTACTGTTGGTGGAAAAACAACCTATGATTGCTTGGGAGTCTTTACCAACTGCTGCTCAAACCTG  
CTCTTGAGAACACCGATTTCGGTGCTGCGAATGTTCCATTTCATTCCGGCTGTTTTTCACAGACAATCTTGCGAAGGCTACTTTCTAG

>Bcin04g02090 (MLST10), partial sequence [organism=Botrytis cinerea, strain U10\_SC\_BR01]  
AACTGTGCAATATGACTATGAATGATGTTTACAAGCCCTACATCCATGTAAGAAATGTAGAATAGAGAGATCAGTAACTGGAACATAATATCGTT  
TGTAGGCTTTCAAGTTACTTACGCAGTTCAACCCAATCACTACAGCTATTGCCGAATCCCCTGTTTCAAATGGCCGCTCTCAGCAAATACCAT  
CGAAAAGTACACACTGCTAGGCCCTTTCTTTCAGAATATCTCCTCTGCAACAGGAAGTTACCAGGAATACTTCAGTGCGCCAAAGACGATAGAT  
AGGGCAGACATTGCCACATCTCAAGATGCGTTACGATTGACCTTACAAAACCCATCAAAAAGATTTACTTGGATATCATCAACCACCTTTGTTTCGAG  
CAAGTCCAATCGCAAAAAGCAAAAACCTGGATTGGTTTCGCTACATTTGTGAATCAAATCACAAGCGTCGAGCACTTCAGGTAGACCCGAAAGA  
AGTGTCTTCTGATGGCTTTATGCACAATGTCACTGTCGTTCTAGATGGTCTTTGTGAGCCATTCATGGATACCACATTTCTCGAAAATTTTCGAAG  
ATTGATATTGATTATCTAAGACGTGCGCCTCGTGTAGATATCAAGGACGAGACCAAGTTGAACGCTGACGAGAAGGCTTCTGAGAAGTATTTATG  
AGGACACTGTTTCTGGCACTTCTAATTTTCATCTCTGAGGTCTTCTTCTCACATTGG

>Bcin01g07220 (MLST1), partial sequence [organism=Botrytis cinerea, strain U11\_M\_E1]  
GGTGTGAAAGTATCTGGCGGATAGAGACCAATGAGCAGAGCAGCTATTGTAGATTTTCCGGAGCCGGAAGGTCCGACAAGTGCAGTTGTTGAGT  
TAGGAATCAGGGAAAGAGAAAAGGATGATATCGTTTCGTTTTTTCGGGACGAGTAGGATATGTGAATGAGAGACGGTTGAATTTGATTGAAAAGAT  
TGTCGAAAGCCGTTTCGGTTCCTTTATTTTCGTGGGAGGAAGATGAATCGAGATTGGCTAATGCAAGCATATGCGTAGCTGTAACGCGAGAAGAG  
TTGATTTGTGGTATCATGGCCAGCATATTCGTACTATTAGAAAATACCAAATAATAGAAGATTGACAGTCTGTAGTGCAGTCCGATACTGATCT  
CTCTCTTGGTAATGAGAACCCTGGCATAATAAAAAGATAGTTGCGAGTATGAAGAATGACATCGCATCTGTCAATCCCCACAGCAATCCCCGAGTA  
GTTTGTCTGATATTAGTCCAACCTTTATAAAAGTTCTTCTGTAGCTTTGGTGTGTTTTGTCTCAAAGTAAGTTTCCAGAGTAAAAGCCCGAACCACT  
TTGATGTTGGAGAAAGTCTCTGAAAATATGCCAGTGGTCAATTCAGAGGCGTAGTTGCACCTGTTTTTCCATTTTCCACTCACGCGATTGAACG  
TTTTTGGTGACAGCGTATATAACTGGCCAGTTGCCATCGAGACTAATGTCAGTTTCCATGTATTACGAAAAGCCCAAATGATTGATATCAATAG  
CATAAAAAACGCTGTGAATACAATACCAGCAAAGCGGCCAACGAGATTACGCATTTCTCAGAGTTCTTATCCAAAACCTTCGT

>Bcin05g07690 (MLST2), partial sequence [organism=Botrytis cinerea, strain U11\_M\_E1]  
AGGATGCCTTCTCTCTACGACAGCAAGCCTTCGATGATATGTTGTGGGTAGTTCTTGGCTGGCTGGATACTGTCAAATTCATTGATTTACATTC  
TGAATTCGACTATTCAAACGACTCTCAGCCAGAATGGTACGGACAACAATAAAGCCTGCATTTGCACATCGAGCGGACTATTTTGGGAATTG  
GCTTACAAGGATGGGATACTACTCTCTGTGGTGGTGGGATGATATGGTACCATACTTACTCCATAACAAGAAATGCAATTACCAATGAACCTCT  
ATATCGCAGCTTCGATATCGATGTACCTCTATTTCCCCGGAGATGACAATCAATCCCCATTTATGCTTTCCAACCCCTTCATATCCACCTCACGA  
TCCGAAAATATCTACAGGCAGCTGTTGATGCTTACAAATGGCTGAATGGTTCCAACATGACGGATTTACAAGGATTATATGTCGACGGGTATCAT  
ATCTCGAATCTTTCTGGCGGTGAAAACACCCATTGCGATTCTAGAAAATGAGATGGTATATACCTACAATCAAGGTGTTTTGCTTACTGGACAAC  
GTGGTTTGTATGACGCAACCGCCGACGATCATACTTGTGGATGGCCACAACTCATCGGAATGTTATTAATGCCACAGGCTATGACCTGAA  
ACACAATGTTGTCATCTCACCGCCACCCAAAAGATGGTTCCGCATTGGCAAAGTGGTTTTGGCTGGGTAGGAATGGAATACGGAAGAAGGATGC  
GATTC AAGTGCTTCGTGTTCTCAAAAATGGACAAAACCTTTCAAAGGCATATCTTTTCATCACTTGATTGCATTTCTGTAGTGATTTGCCAGGGGAGC  
CTATTGCAGGGACGAAAAGAA

>Bcin06g01710 (MLST3), partial sequence [organism=Botrytis cinerea, strain U11\_M\_E1]  
AGCTTCGAAACGCTCTTCCGAGAGGAATTTGCCAGTCCCGATAGTCGGTTACGAGTCCACTCTCTGAAAACCTGCTTGCGAAGATAACTTGGTGT  
TATGGAGAGTGCATCGATCAGATCTTTGCGTTTCTTGACATATAGGCAAGAAGCGTCGAAAATTTGTGAGAAGCCATTTGTGCATGTTTCATATCA  
AAGGAATGGAAATGCTGGAAGGACGATGTTAGATGATGGTATTCAGGGCAAACCAAAGCTGCACCTGCATAAGCAGCATCGACGTGAACCCAGA  
TCTCGCCTGCAACATCTGGAGGTGCATATTTTGAAGTACTGTTGCAATAGATGCGAAGTCTCAACTGCGCATGTAGATGTTGTTCCCAACGT  
CGAAGTTAGATAGAAGGTTCCAATCCTTGAGATTTGCATTTCTTCAATACCTTCTCTAAATCATCACCCGTCATGGCGAAATCATTTGGATGCG  
AGTACTGGAATCGATCGGAATCTAACGCCAGTATCTGCGCTGCTTTCTGCGTGGAGCTGTGTGCCATTTTCGTTCCCTAGTGCAACTAGCTTAC

```
TCCTCTTATATGCAATCGCATCCTCGAGTTCAATTTCCCGACAGACCTTCAGTGGTTTCACGAAGATACTTATCGCGGGCAGCAACCATAACGGT
AACGATAGCTTCCGAGGCTGATCCTTGATAACACCACCACCATGAGTCGACGACAAAATAACAGTCTGGGAGATTGAGAAGCTTGGCCAACCAA
TCCATTACAACCGTCTCCAATTCTGTACAGCAGGGGAACAGATCCAATTGAAAAGCAGGAGCTGTGAAAGCTGCTGAGTATAATTTCTCCAGCA
TTCCAGGGTAGGTAGATGATGCAGGGGAAGAACGCCATGAAATTAGGTGATTGCCCTG
```

>Bcin09g03030 (MLST4), partial sequence [organism=Botrytis cinerea, strain U11\_M\_E1]

```
GCAGAGAGAGTCTTGAGGAGGTCGCCAAGAGTTGGAAGAATAGGAGTGGCGGTGTCATTTGTCGAGGGCAGGGGAACGGAATTGAAGGAGATTC
TGAAAGCTTTGGAAGGGAATATGAGTGGTGAAGGATAGTCATAGGAAGAGAGCTAAGCCGGCAGAATAGTTTAGTACTGGGATCATCACAATA
TGGAGAGGTCAATCATAACAAGACTTGGGCTACGGCCAGGGAATATACCCAGAGAGGATAGTCAGTCAAGTTTGGGAATGTCAACGTTGGAGGTC
AATGACGAGGAAGATGAGGATGGCCTGATGGATCCAAGAAGGTGGTTAAAAGTCGTTGATGCATTTGAGCAACCTCGACTGGTGTACAATGTTG
CTAAAAAGCACTTTGATAGGTATGTTTCAATGATAAAAAATTTATCTGAATCGACTAACTCAGTACAGAGATACCTCCAAACCTTCATTTGTTCCC
ACCTGCGTCTCATAAAAACACTCCTCTTCCAAAACCGCTATAATGTTATCCATCAACGTCTCCTTCGCAATGAATCTTTTCAAACGCCCGCTTTT
CAAGGTGGCAAATCTTCCCTCAACGCAGCAGCTCCGCCATTACCACCAACAACAATCATACAAATTAACGCCGATAGCTAATCTTCTCGGTC
GCAATCGCAGCTCTCATATGCTTCTCGGTCTCCTCAGTATTTACCCACTGGTACCCTCGCCATCAATGACCTG
```

>Bcin11g01310 (MLST5), partial sequence [organism=Botrytis cinerea, strain U11\_M\_E1]

```
TCATGTGGAACCGGCGTAGAATGCGCAACGCTTGAAGTTCCGCTCGAATATGGCGATGCAACGTCAACGGCAAAGCCAGTGTTCGCTTGCTC
GTTATCCTGCCACTGTTGCCCGAGCAAGAAGCTCGGGTCTCTTTGATAAAATCCCGGTGGACCCGGTGCCTCTGGTGTGGCTTTGTGCAGTC
TGGAGCCGGTGGCCCGTCTCGACACTGAGTGGTGGATTATACGATATCATCGGATGGGATCCACGTGGAACCGGTGCTTCGGCTCCTATTTTG
GAATGTTTTGCAAATGCCAGTGCAGGATGATGTTTTAACACGCGTTTCCATCTGCTCCGAATCTCTGGCTCGGACAATTTGCGAATGCCAGCG
CAAATCTGCTGTTAGCTCTGCTATCACATCCTTTGACACTTCTGTCGCTGCTTTGCAAAGCTTGGTGGCTCAGAAATCTCCCGCTCTTTA
CACCTCAACAGCAGCATATGTTGCTCGAGACATGGCAGCGATAGTCGATGCATTTGGATGGGACCTCTGCAAAACTTAACCTACTGGGGTTTCTCA
TATGGAACATCTTCCAGCTGAGTTTATCCAAACTTTCCAGGCCGCTGGGAAGAGTTCTTGCCGATGGTGTTCGACGCAAAGGCAAATG
CACTCACATACGTTAGCCAACTTCCCAACGATCAACTCAGTGTTCGTGCTTCGTTGAACGATTTTGCAGCTTTCTGCACCACCGCCGGTAGTAA
AGGTTGCTCTTTTGCCACCGCCCTACTGGAACCTCAGGTACTGTTGCTACCAGACTGGACAACATAATGAAGGATATG
```

>Bcin15g03910 (MLST6), partial sequence [organism=Botrytis cinerea, strain U11\_M\_E1]

```
TCTTTGAAAGCCTTCTCTAGCATCTCCTCTCCTAACGTCATATGTCCCGTGGAATGGTTTCGAAAACATAATTTTCCGGCCTCATCCCAATGTC
TTTAAACCTTAGCCAATCTTCTTTATAAAATGGCTCTTTCTTTTTCAGTGGTGTAACTTCCGTGCCGTTGACTTCAGCCACCATCCACTTTCCCTTAG
GGATGACAGTTGTATCGTCTTCAAAGACATACATTACGAATCGTTCCAATTTTTTCCATGTTGGATTTATATGTTTGGTCTTTGAGAACGCGCTC
ATTATTGATGTCGGCAAGGAAATTTGAATATTTCAAGGTAAGAGTCTAGGTTTTCCGGATCTCTGAAGTATTGAGCGGGTACGAGACGAGATTGG
ACAAAGGTTGACCAGGTGTTGGATCGAAAAGGGTTTGGAGCACCGCGACAGAGGAAATCGGCAGGACCACAGGATTTGGAAGGCAGAAATGCCGT
TGTGTTGGGAACCGAAGGTCAGGAGAGAGCGGATGGGTGGAGCATTGCAGCGGGATATGTAACCGCGCAAGAATTTGGCCGCTTGGGAGAATCC
AATTGCGTTCGACGGCGGGCGGTTAGAGAGAATAGGATGGGAGGCGAGGTCTTCGACAGCTTTTTCGATTTGAACTTGGTAAGAGAGTTAGTAT
GGTATTTAAAGGAAAAATAGGGATGTACTCACGAGTGAGATTTCAAAGAAGGTAGCTGTCTATCTGCAGATGCATCCTCATCTACATGAAT
ATTATAGACAAAAGTCCAGGATGAATAGCTTTCAGCTAGTTTTTCCAACCTTGCACAAGACCATCCGCTTTGTAATTTATCGCCGAGTCCATGCCAG
ATAATCAAGGGAAGTGGAGTATCAT
```

>Bcin16g03460 (MLST7), partial sequence [organism=Botrytis cinerea, strain U11\_M\_E1]

```
TCTTCATGAACCTCTTAATTTGAACTCTTCATTAATTGCAAGTGATGAACCCCTATTTCTGCCAGAGGATAGTTACAAGACGTATATCATTAG
TCGAGAACCACCTCATGATATACATTGACGGATTTTTGAAAAGCGAATGAAAGTAAACACTTGGTTGATGTTAGGTGTGTTATTTATTTCTGATGAA
ATGAACAAGAGAGACTGATGAGATAGTGAACCGCTTTATGAACCGTCTACTGTTTCTCACGGACAGGAAGTTACCATTGATCCTTCGGTTCGAA
ATTCTGAAGTGGCGATTTTAGAGAGGGATGAGGTGGTCAAGTGTATTGAGCATAGAGCGAGGGCATTTCAGGGGTGGAGGGGCGAGATGGGGAT
TGAGAAGCTGAGGACGAGAGGTATGGGGTTGGAGGACATTATGGGATGCATTTGTAAGTTTTGGGGGATGACGAAGGCCCTCTGTCTATTTTC
TATCAGTACGGATCTTGAAAAGAAAGATAGCATGAACACGAGGGCTAATAACTAGGAAATAGCGATTGGAGCGGAGGTAAACGTGGCATAGACCG
ATTTAGTACTTTTCATGGTCTATGTCGACGTATCCTCTGATATCGAAGGTGGAGGAACGGAAATCCCACGTATTGTGGGACCAAAGGAGGAAGG
TGGGAGGACTTCTTGAAAACCTACGGAAGCATTTGGATCCAAGAACTGGAGAAAATGTAACAGTAGAAGGGGTGACATTCAAACCAATCAAGGGAA
ATGCCGTATTCT
```

>Bcin12g03020 (MLST8), partial sequence [organism=Botrytis cinerea, strain U11\_M\_E1]

```
AGTCACCAAAAAGCACGAATAAAACCATCGGCAAGGGAAAATATTTCTCTGAACCACAACATGACACGAGCGCGGAAGAGTATATCGGGCGAGAAGCT
TCATCAAGAGCACCAAAGCGACAACGAGTCGATGATAAATTATAACTCTTACGGTGGAAAGAAATGAGAATACAGCAGCTTATGCTTCCGGGAAAC
TTCCATCTGGAAGTATAAATGTTGGTGGAGGTAGGAAGACCCTTTTCAAGAAGAACCCTCGAACGGCATTGTGTCGCTGGCAAGTTGCCCCCTGG
AAGTATCAACATTTGGTGGAAAAGAGGCTACCCAAATCGAGGACGAGGGTAGAGCAGCTTATGCTTCCGAAAATTTGCCCCAGGAAGTATAAAC
TCTGGCGCAAAGAAGGCGATTTTCATTTCCAAGATGAAAACGAGACCGGCTTATGTCCTTGAAAAGCTTCCACATGGTAGTATCGACGGTATGCGAA
ACCGTGAAATGGCTGCCGTCCACCGCGAAAATGCTGAGGGTGGGAGGAAACCAGGCCAGGTTGTCTCTTCTTATTCACATTTCAATCCTACTTC
AAAGAAAACCTTTCGATGAACCCGAAGAACAAGCGGAACCGGCAAACCATCCAATGCACCTTTGACAGAGGAAATGGCGACTTTCACCAATCTA
```

GGGTTATCGAGAAGGCTTGCAGCCCATCTATCGACTAAACTCGATATGAAAGCCCCGACCGCCATTCAAAAAGCATCTGTGCAGCAGTTGGTAT  
CGGACGATAGCGATGCTTTCATACAAGCAGAGACTGGATCTGGAAAACTTTGGCATATCTACTACCTATAGTCGAGCGAATATTAGCATTGAG  
TGAGAATGGCGT

>Bcin02g07770 (MLST9), partial sequence [organism=Botrytis cinerea, strain U11\_M\_E1]  
ACACGATTGCTATTGAGTCTCTAACATATTTTAGTGGTGGTTTGTCCAACTGGCAGTAGCAATGGTGGTTGCAGCAGCAGTACCGGTCAAGT  
ATATGTTTCGAGGAGGACAAAAGCGGATCAAACTACGCCATCATGTACTCCTGGTAAGTTCTCTCTAAACTTCTCCTTATAGATCCAACCTAACAA  
AATCTTAGGTACATGCCAAAAGGACGAGCCCTCAACCGGTATTGGTCACCGTCACGATTGGGAAGGTGTAATTGTCTGGCTCTCAAGCGCCACCG  
CCACAACCTGCCGACAACATCTTAGCCGTTTGTCTTCCGCCACGGAGGCTGGGATTGTTCCACCGATGGATATTCCTTTCTGGTACCAGCCC  
TCTTATCAAGTACGAAAAGTATCTGGCCCGTCGATCAATGGGTCTTACTAGTACTGTTGGTGGAAAAACAACCTATGATTGCTTGGGAGTCT  
TTACCAACTGCTGCTCAAACTGCTCTTGAGAACACCGATTTCGGTGCTGCGAATGTTCATTCCCGGCTGTTTTCCACAGATAATCTTGCGA  
AGGCTACTTTCTAG

>Bcin04g02090 (MLST10), partial sequence [organism=Botrytis cinerea, strain U11\_M\_E1]  
AACTGTGCAATATGACTATGAATGATGTTTACAAGCCCTACATCCATGTAAGAAATGTAGAATAGAGAGATCAGTAACTGGAACATAATATCGTT  
TGTAGGCTTTCAAGTTACTTACGCAGTTCAACCCAATCACTACAGCTATTGCCGAATCCCCACTATTTCAAATGGCTGTCTCAGCAAATACCAT  
CGAAAAGTACACACTGCTAGGCCCTTTCTTCAGAAATATCTCCTCTGCAACAGGAAGTTACCAGGGAATACCTCAGTGCGCCAAAGACGATAGAT  
AGACGACACATTGCCACATCTCAAGATGCGTTACGATTAACCTTACAAAACCCATCAAAAAGATTACTTGATATCATCAACCACCTTGTTCGAG  
CAAGTCCAATCGCAAAAAGCAAAAACCTGGATTGGTTTCGCTACATTTGTGAATCAAAATCACAAACGTCGAGCACTTCAGGTAGACCCGAAAGA  
AGTGTCTTCTGATGGCTTTATGCACAATGTCACTGTCTGTCTTAGATGGTCTTTGTGAGCCATTCATGGATACCACATCTCGAAAATTTGGAAG  
ATTGATATTGATTATCTAAGACGTGCGCCTCGTGTAGATATCAAGGACGAGACCAAGTTGAACGCTGATGAGAAGGCTTCTGAGAAGTATTATG  
AGGACACTGTTTCTGGCACTTCTAATTTTCACTCTCTGAGGTCTTCTTTCTGACATTGG

>Bcin01g07220 (MLST1), partial sequence [organism=Botrytis paeoniae, strain Pae\_14]  
GGTGTGAGGATCTGGTGGATAAAGACCAATGAGGAGAGCAGCTATTGTAGATTTTCCGGAGCCGGAGGGTCCGACAAGTGCGGTTATTGAGT  
TAGGGTTTTAGGGAAAAGAGAAAAGGATGATATCGTTTCGTGTTTCAGGACGAGCAGGATATGTGAATGAGAGGCGTTTTGAATTTGATTGGAAAAAT  
TGTCGAAAAGTCGTTTCGGTTTCTTTATTTTCGTGGGACGAAGATGAATCGAGATTGGCTAATTCAGCATATGCGTAGCTGTAACGCGAGAAGAG  
TTAATTTGTGGTATCATGGCCAGCATATTCGTACTATTAGAAAATACCGAATAGTAGAAGATTGACAGTCTGTAATGCAGTCCGATACTAATCT  
CTCTTTTGGTAGTGAGAACCCTGGCATAATAAAAAGATAGTTGCAAGTATGAAAGATGACATCGCATCTGTGAGTCCCCAAAGTAGCCCCGAGTA  
GTTTGTCTGTAAGTCTGTTCAACTTTATAAAAGCTCTTCTGTAGCTTTGGTGTGCTTCTTCTCGAAAATAAGTTTCCAAAGTAAAAGCCCGAACCT  
TTGATGTTGGAGAAAGTCTCTGAAAATATGCCGGTGGTCATTTTCAGAAGCGTAGTTGCATTTGTTTTCCATTTTCCACTCACGCGATTGAATG  
TTTTGGTGACAGCGTATATAACTGGCCAGTTGCCATTGAGACTAGTGTGAGTTTCCATGTATTTCAGAACGCCAAGATGATTGATATAAAATAG  
CATAAAGAATGCTGTAAAATACAATACCAGCAAAGCGACCAACGAGATTACGCATTTCCCTCAGAATTCCTATCCAAAACCTTCG

>Bcin05g07690 (MLST2), partial sequence [organism=Botrytis paeoniae, strain Pae\_14]  
TAGGATGCCTTCTCTACGACAGCAAGCCTATGATGATATGTTATGGGTAGTTCTTGGTTGGTTGGATACTGTCAAATTCATTGATTTGCACT  
CTGAATTACACTATTTCGAACGACTCTCAACCAGAAATGGTACGGACAACAATACAAAACCTGCATTTGCCACCAGGACGACTATTTTGGGAATT  
GGCATCGCAAGGATGGGATACTACTCTCTGTGGTGGTGGGATGATATGGTCTCCATACCTTACTCCATACAAGAACGCAATCCCAATGAACCTC  
TACATCGCAGCTTCGATATCGATGTATCTATATTTCCCTGGAGATGACAATCAATCTCCATTTATCTTTTCCAACCCCTACATATTCACCTCGCG  
ATCCGAAAATATCTACAGGCAGCTGTTGATGCTTACAAAATGGCTGAACGGTTCAAATATGACGGATTTCGAAGGATTGTATGTGACGGATATCA  
TATCTCGAATCTTTCTGGCGGTGACAATACCCATTGCGATTCTAGAAAATGAGATGGTATATACCTACAATCAAGGCGTTTTACTTACTGGACAA  
CGTGGTTTTGTATGACGCAACCGCCGCAAGATCATACTTGTGGATGGCATAAACTTATCGGAATGTTATTAATGCCACAGGCTACGATCTTA  
AAGACAACGTTGTATCTCACCGCCACCCAAAAGATGGGTCCGCATTGGCAAAAATGGTTTTGGTCTTGGTAGAAAATGGAATACTGGAAGAAGGTTG  
CGATTCAAGTGTCTCGTGTCTCAAAAATGGACAAAACCTTCAAAGGCATATCTTTTCATCATTTGATTGCATTTCTGTAGTATTGACCAGGGAG  
CCTATTGCAGGGACGAAAAGA

>Bcin06g01710 (MLST3), partial sequence [organism=Botrytis paeoniae, strain Pae\_14]  
GCTTCGGAAGCGTCTACCAAGAGAGATTTGCCAGTCCCAGATAGTCGGTTACGAGTCCACTTTCTGAGAACTCGTTGCGAAGATAACTTGGTGT  
ATGGAGAGTGCCTCGATCAAATCTTTGCGTTTCTTGACATATAGACATGATGCTCGAAAATTTGTGAGAAGCCATTTGTGCATGTTTCATATCGA  
ACGAATGGAATGTTGGAAGGACGATGTTAAATGATGGTATTCGGGGCAAACCTAAAGCTGCACCTGCATAAGCAGCATCAACGTGAACCCAGAT  
CTCGCCTGCAACATCTGGACGTGCGTATTTTGAATTTATTGACGCGATAGATGCGAAAATCGTCAACTGCGCATGTGGATGTTGTTCCCAAAGTC  
GAAGTTAGATAGAAGGTTTCCAATCCTTGAGATTGCAATCTTTCAATACTTTCTCTAGATCATCACCCGTCATGGCGAAAATCGTTGGATGCGA  
GTACTGGAATGGATCGAAACCTAACACCGGCTATTTGCGCTGCTTTCTGTGTGGAGCTGTGTGCCATTTGCTTCCTAAGGCAACTAGCTTACT  
CCTCTTGTATGCAATCGCATCTTCGAGTTCAACCCCTGATAAAACCCGAGTAGTTTTACGTTAGATATTTATCGCGAGCAGCAACCATGACGGTA  
ACTATAGCTTCTGAAGCCGATCCTTGATAACACCACCACCATGAGTGCCTTGACAAAATAACAGTCTGGGAGATTAAGAAGCTTGGCCAGCCAGT  
CCATTACAACAGTCTCCAATCTGTACAGCAGGGGAACAGATCCAATTGAAAGCAGGAGCAGTAAAAGCTGCTGAGTATAACTCTCCGAGCAT  
TCCAGGATAGGTAGATGATGCGGGGAAGAAAAGCCATAAAAATAGGTGATTGCCTTG



>Bcin09g03030 (MLST4), partial sequence [organism=Botrytis paeoniae, strain Pae\_14]  
AAGAAGGACTGGCAGAAAAGATTCTAGAGGAGGTTGCAAAGAGTTGGAAGAAATAGGAGTGGCCGGTGTATTGTCGATGGAGAGGGGACGGAATT  
GAAGGAGATTCTGAAAAGCTTTGGAAGGGAAATATGAGTGGTGGGAGGATAGTCGTAGGACGAGAATTAAGCCGGCAGAACAGTTTATGATTTGGGA  
TCATCACAATATGGAGAAGTCAATCATAACCAGGCTTGGACTACGGCCAGGGAATATACCTAGAGAGGATAGTCAGTCAAGTTTGGGAATGTCAA  
CGTTGGAGGTGAATGACGAGGAAGATGAGGATGGCTGATGGATCCAAGGAAGTGGTTGAAAGTCATCGATGCTTTTGGCAACCTCGATTGGT  
GTATAATGTTGCTAAGAAGCACTTTGATAGGTATGTTTCAATGATATTTCTTTTCATCTGAATCGACTAATGCATTACAGAGATACCTCCAAACCT  
TCATTATTCCACCTGCGTCCCATAAAAACACTCCTCTTCCAAAACCGCTATAATGTTATCCATCAACGTCTTCTTCGCAATGAGTCTTTTCAA  
CGCCCGCTTTTCAAGGTGGCAAAGCTTCTCTTCAACGTAGCACATCCGCCATTACCACCCAGCAACAATCATACAAATTAACGCCGATAGCTAA  
TCTTCTCGGCCGAATCGCAGCACCCATATGCTTCTCGGCTCCTCAGCATTTCCGCCACTGGTACCCTCGCCATTAATGACCTG

>Bcin11g01310 (MLST5), partial sequence [organism=Botrytis paeoniae, strain Pae\_14]  
TCATGTGGCACCGGTGTAGAATGCGCAACCCTTGACGTTCGCTCGAATATGGCGATTGGAAGTCAACAGCGAAAGCAAATGTCGCGCTTGCTC  
GTTATCCTGCCACTGTAGCAGCGAGCAAGAAGCTCGGGTCTCTTGTATCAACCCCGTGGACCCGGTGCAGTGGTGTGGATTTGTGCAGTC  
CGGGGCCGGTGGCCCGTCTCGGCACTTAGCGGTGGATTGTACGATGTCATTGGATGGGATCCGCGTGGAACTGGTGTCTCGGCTCCTATCTTG  
GAATGCTTTCCAAATGCCAGTGGGAGTATGATTTCAACAACGCATTTCCATCCGCTCCAAATCTTTGGCTTGACAATTTGCGAATGCTAGCG  
CCGATGCTGCTGTAGCTCTGCTATCACATCTTTGACACCTCTGTGCTGCTCTTGCAAAAGCTTGTGTAGCTCAGAAATCTCCCGCTCTTTA  
CACCTCAACAGCGGCATATGTTGTCCGAGACATGGCAGCGATAGTTGATGCATTGGATGGAACTCTGCAAAACTCAACTACTGGGGTTTCTCA  
TATGGAATATTTTCTCGCCGAGTTTATCCAAACCTTTCCAGGCCGCTAGGAAGAGTTATTGCTGATGGTGTCTTTGACGCAAAGGCAAACG  
CCCTTACATACGTCAGCAACTACCAAACGATCAAGTCAAGTGTCTGCTGCTTGTGAAACGATTTTGCAGCTTTCTGCACCACCGCCGGCAGTAA  
AGGATGCTCTTTTGGCACCGCACCTACTG

>Bcin15g03910 (MLST6), partial sequence [organism=Botrytis paeoniae, strain Pae\_14]  
TTTTCTAGCATCTCCTCTCCTAATGTCATATGACCCCTGGAATGGTTTCGAAAACCAATTTTCCGGCTTCATCCAATGTCTTCAAACCTACCC  
AATCTTCTTTATAAAATGGCTCTTTCTTTTCTAGTGGTGAACCTCCGTTGCCGTTGACTTCAGCCACCATCCACTTTCCCTGGGAATGACGGTTGT  
ATCGTCTTCGAAGACGTACATGACGAATCGTTCCAATCTTTCCATGTTGATTTATATGTTTTCATTCTTGAGAACACGCTCATTATTGATATCG  
GCGAGGAAATTAGAAAATTCAGGTAAGATTCTAGATTTTTCGGGATCTCGGAAGTATTGAGCGGGTACGAGACGAGATTGGACAAATGTTGACC  
AGGTGTTGGAACGTAGGAGGGTTTGGACCCCCGACAGAGAAAATCGGTAGGACCACAGGCTTGGAAAGGAAGAAATGCCGTTATGTTGGGAACC  
GAATGTCAGGAGGGAGCGGATGGGTGGAGAATTGCAGCGGGATATGTAGCCGCGCAAGAAATGGCCCTCTGGGAGAATCCGATGCGTTCGACG  
GCGGGCGCGGTAGAGAGAATAGGATGGGAGGCTAGGTCTTCGCGACCTTTTTCGATTTGAACTTGGTGGAGAGTTAGTATGGTGTTTAAAGGA  
AAGCTAGAGGATGTACTCACGAGTGAATTTCCAAAGAAAGTAGCCGTCCTATCTGCAGATGCATCATCTACATGAATATTATAGACAAAA  
GTCCCGGGGTGAATAGCTTCAGCTAATTTCTCCAATTTGCGCAAGACCATCCGCTTTGTAGTTATCACCCAGTCCATGCCAGATAATCAAGGGTA  
GTGGAGTATCAT

>Bcin16g03460 (MLST7), partial sequence [organism=Botrytis paeoniae, strain Pae\_14]  
TCTTCATGAACCTCTCAATTTGAACTCTTCATTTATCGCAAGTGATGAACCCCTATTTTGTCCGGAGGATAGCTATAAGACGTTTCATTATTAGT  
CGAGAACCCTTATGATATATATTGAAGGGTTTTTGAAGCGAATGAGAGTAAACATTTGGTGGATGTTAGGTATGTTGGTTCTTCTGATGGGA  
TGAAGAGGAGAACTGATGGGATAGTGAACCGCTTTATAAACCGTCTACGTTTTCTCATGGTCAGGAAGTTACAGTTGATCTTCGGTTCGAGA  
TTCTGAGGTAGCAGTACTAGAGAGAGATGAGGTGGTTAGATGTATTGAGCATAGAGCGAGAGCATTTTCAGGGATGGAGAGGTGAGATGGGGATT  
GAGAAGTTGAGGACGCAGAGGTATGGGGTGGGGGGACATTATGGGATGCATTTGTAAGTTTGGGGGATTGACGAAGGCTTTTGTTTATTTTCT  
ATCAACATGGAGCTTTCCGAAGAGATATTGTGTACACGAGGGCTGATGATAGAAATAGCGATTGGAGCGGAGGCAAACGTGGCATAGACCGAAT  
AAGTACGTTTCATGGTCTACGTCGACGTATCCTCCGATATCAAAGGTGGAGGAACGGAATTTCCACGTATCGTGGGACCAAAGGAGGAAGGTGG  
GAGGAATTCCTCGATACTACCGAAGCATTAGACCCAAGAGCGGAAAAAATGTAACGGTAGAAGGAGTGACATTCAAACCCATCAAGGGAAATG  
CCGTATTCT

>Bcin12g03020 (MLST8), partial sequence [organism=Botrytis paeoniae, strain Pae\_14]  
ACTGCGCAGCACCGAGTCACTAAGAGCACGCATAAACCATCGGCAAGAGAAAATATCTCTGAACCACAACATGATACCAGCGCGGAAGAGTATA  
TTGGGCGAGGAGCTTCATCAAGAGCACCAAAGCGACAACGAGTGCATGATAATTACAACCTTTACGGCGGAAGAAATGAAAATACAGCAGCTTA  
TGCTTCCGGAAAGCTTCCATCTGGAATATAAATGTTGGAGGAGGTAGAAAGACCCTTTTCAAGAAGAACCTAGAACAGCATTTGTGCTGCTGGC  
AAGTTGCCCTCCCGAAGTATAAATATTGGTGGAAAGAGGCTACCCAAATCGAGGACGAGGGTAGAGCAGCTTATGCTTCCGGGAAATTTGCCCTC  
CAGGAAGTATAAATTTCTGGCGCAAAGAGGTTATTTCAATTCAGGATGAAACGAGACCGGCTTATGCTTCCGGAAAGCTCCACATGGTAGTAT  
CGAAGGTATGCGAAACCGTGAAATGGCTGCTGTCCACCAGGAAATGCTGAGGGTGGGAGGAAACCAGGCCAGGTTGTCTCGTCTCTATTACAA  
TTCAATCCCACTTCAAAGAAAATTTGATGAACCTGAAGAACAAGCGGAACCGGCAAAACCATCCAACGCGCTTTGACAGAGGAAATGGCGA  
CATTCACCAATCTAGGACTATCGAGAAGGCTTGCAGCCATCTATCGACTAAATCGATATGAAAGCTCCAACCGCCATCCAAAAGGCATCCGT  
ACAGCAGCTGATATCAGACGATAGCGATGCCTTCATACAAGCAGAGACTGGATCTGGAAAAACCTTGGCATATCTACTACCTATAGTTGAGCGG  
ATATTGGCATTGAGTGAGAATGGCGTACA

>Bcin02g07770 (MLST9), partial sequence [organism=Botrytis paeoniae, strain Pae\_14]  
ATCTACAGTCGTTGCCATCCCTACACCATCACAGCTTGAGTCTCGGGCCGTTATCAGTTCCGATGCCGTTGTAGGATTTCCCAGAACTGTTCCCT  
AGCGGGACAGTAGGAACAGTCTATGAGACATATCAACCATATCTTGATGTAGTCAATGGATGCGTACCATTTCCCTGCCGTCGATGCATCGGGTA  
ACACGGGGTATGTCTTACATTTTTTATCCACATGATTCCCTATTGAGTCTAACATATTTTAGTGGTGGTTTGGCACCAACTGGCAGTAGCAACGG  
TGTTGACAGCAGTAGTACTGGTCAAGTATACGTCGAGGAGCACAAAGCGGATCATACTACGGTATCATGTACTCCTGGTAAGTGCCTCTCTAAT  
CACCTCCTTACAGATCCAACTAATAAAATCTCAGGTACATGCCAAAAGACGAGCCCTCAACCGGTATTGGTACCCTCACGACTGGGAAGGTG  
TAATCGTCTGGCTCTCCAGCTCAACCGCCACAACCGCCGACAACATCGTAGCCGTGTGTCCTTCCGCCCATGGAGGCTGGGATTTGTTCCACCGA  
TGGTTATTCCCTTTCTGGTACCAGTCCCTCTCATCAAGTACGAAAGTATCTGGCCATCGATCACTCAATGGGTCTTACTAGTACTGTTGGTGGGA  
CAACAACCTATGATTGCTTGGGAATCTTTACCTACTGCTGCTCAAACCTGCTCTTGAGACGACTGATTTTGGTCTGCGAATGTTCCATTCATTC  
CATCTGTTTTTC

>Bcin04g02090 (MLST10), partial sequence [organism=Botrytis paeoniae, strain Pae\_14]  
AACTCTCAATATGACTATGAATGATGTTTACAAGCCCTACATTCATGTAAGAAATGTAGAATGGAGAGATCAATAACTGGAACAAATGTCGTTTT  
GTAGGCTTTCAAATTGCTTACGCAGTTCAACCCAATCACTACAGCTATTGCCGAATCTCCACTATTCCAAATGGCTGTTTTAGCAAATACTATC  
GAAAAGTACACACTACTTGGCCCTTTCTTTCAGAAATATCTCCTTTGCAACAAGAAAGTTACCAGGGAATACTTCGGTGCGCCAAAGACGATAGATA  
GGCGACATATTGCCACATCTCAAGATGCGTTACGATTGACCTTACAAACCCATCAAAAAGATTTACTTGATATCATCAACCACCTTTGTTGAGC  
AAGTCCAATAGCTAAAAGCAAAACCTTGGATTGGTTTGCCTACATCGTAAATCAAAATCACAAGCGTCGAGCACCTCAGGTGGATCCAAAAGAA  
GTGTCTTCTGATGGCTTTATGCATAACGTCCTGTTGTTTTAGATGGTCTTTGCGAGCCATTCATGGATACCACATTTTCGAAGATCTCGAAGA  
TTGATATCGATTATCTACGACGTGCGCCCTCGTGTGATATTAAGGACGAGACCAAGTTGAACGCTGACGAGAAGGCTTCCGAAAAGTATTATGA  
GGCCACTGTTGATGGCACTTCTAATTTTCATCTCCGAGGTCTTCTTTCTGACGCTGG

>Bcin01g07220 (MLST1), partial sequence [organism=Botrytis sinoviticola, strain GB5\_5]  
GTGTTGAAGCATCTGGCGGATAAAGACCAATGAGCAGAGCAGCTATTGTAGATTTTCCAGAGCCGGAGGGTCCGACAAGTGCAGTTGTTGAGTT  
AGGACTCAGGGAAAAGAGAAAAGGATGATATCGTTCGTTTTTTCAGGTGAGCAGGGTATGTAAACAAGAGGCGGTGCAATTTGATTGGAAAAATT  
GTTGAAAGTCGTTCCGTTCTTTATTTTTCTGTTGGGAGGAAGATGAATCAAGATTGGCTAATGCAAGCATAACGCGTCGCTGTAACGCGAGAAGAGT  
TGATTTGTGGTATCATGGCCAGCATGTTCTGACTATTAGATATACCGAATAGTAGAAGATTGACAGTCTGTAGTGCAGTCGCGATACTGATCTC  
TCTTTTGGTAATGAGAACCGTGGCATAATAAAAGATAGTTGCAGTGATGAAGAAGGACATCGCATCTGTCAATCCCCACAGTAATCCCGAGTAA  
TTTGCTCGTATTAGTCCAACCTTTATAAAGTTCTTCTGTAGCTTTGGTGTGTTTTGTCTCAAAAATAAGTTTCCAGAGTAAAAGCCCCGAACCCTT  
TGATGTTGGAGAAAAGTCTCTGAAAAATATGCCGGTGGTCATTTTCAGAGGCGTAGTTGCACTTGTTTTTCCCATTTTCCACTCACACGATTAAAAGT  
TTTTGGTAACAGCGTATATGACTGGCCAGTTGCCATTGAGACTAATGTTAGTTTCCATGTATTTCACGAAAGCCCATATGATTGATATCAATAGC  
ATGAAAAATGCCGTGAACACGATACCAGCGAAGCGACCAACGAGATTACGCATTTCTCGGAGTTCTTATCCAAAACCTTCGT

>Bcin05g07690 (MLST2), partial sequence [organism=Botrytis sinoviticola, strain GB5\_5]  
AGGATGCCTTCTCTCTACGACAGCAAGCCTATGATGATATGTTATGGGTAGTTCTTGGTTGGCTGGATACTGTCAAATTCATTGATTTACACTC  
TGAATTACACTATTGAAACGATTCTCAACCAGAATGGTACGGACAACAATACAAACCTGCATTTGCACATCGAGCGGACTATTTTGGGAATTG  
GCATCACAAGGATGGGACACTACCCTCTGTGGAGGTGGGATGATATGGTCTCCATACCTTACCCCATACAAGAACGCAATTACCAATGAACCTC  
ATATCGCAGCTTCGATCTCGATGTACCTCTATTTCCCTGGAGATGACAATCAATCCCCATTTATGCTTTCCAACCCCTTCATATCCACCTCGCGA  
TCCGAAATATCTACAAGCAGCTGTTGATGCTTACAGATGGCTGAACGGTTCCAACATGACGGATTTGCAGGGACTATATGTCGACGGATATCAT  
ATCTCGAATCTTTCTGGCGGTGAAAACACGCATTTGCGATTTAGAAAATGAGATGGTATATACCTACAATCAAGGTGTTTTACTTACTGGACAAC  
GCGGTTTGTATGACGCAACCGCCGACGATCATACTTCTGGATGGCCACAACTCATCGCGAATGTTGTTAATGCCACAGGCTATGATCTGAA  
ACACAATGTTGTCATCTCACCGCCACCCAAAGATGGTTCCGCATTTGGCAAAGTGGTTCGGTCTTGGTAGGAATGGAATACCTGGAAGAAGGTG  
GATTCAGTGTCTCGTGTCCAAAATGGACAAAATTTCAAAGGCATATTTCTTTCATCATTTGATTGCATTTCTGTAGTATTGTTGCAAGGGAGC  
CTCTTGCAGGGACGAAAAGAAA

>Bcin06g01710 (MLST3), partial sequence [organism=Botrytis sinoviticola, strain GB5\_5]  
TTTAAGCTTCGGAAGCGTCTTCCGAGAGGAATCTGCCAGTCCCGATAGTCCGTTACGAGTCCACTCTCTGAAAACCTGTTGCGAAGATAACTTG  
GTGTTATGGAGAGTGCATCGATCAAAATCTTTGCGTTTCTTGACATATAAACAAGAGCGTCGAAATTTGTAAGAAGCCATTTGTGCATGTTTCAT  
ATCGAATGAATGGAAATGTTGGAAGGATGATGTTAGATGATGGTATTCAGGGCAAACCAAAGCTGCACCTGCATAGGCAGCATCGACATGAACC  
CAGATCTCGCCTGCAACATCTGGAGGTGCATACTTTGAAAGTACTGTTGTGATAGATGCGAAGTCATCAACTGCGCATGTGGATGTTGTCCCA  
AAGTCGAAGTTAGATAGAAGGGTTCCAATCCTTGAGATTTGCATTTCTTCAATACCTTTTCTAAATCATCACCGGTTCATGGCAAATCATTAGA  
TGCGAGCACTGGAACCGATCGGAATCTAACGCCAGCTATCTGCGCTGCTTTCTGCGTGGAGCTGTGTGCCATTTCCGCTTCTTAGTGCAACTAGC  
TTACTCCTCTTATATGCAATCGCATCCTCGAGTTCAATACCTGACAGACCTTCAGTAGTTTACGAAAGATATTTATCGCGGGCAGCGACCATTA  
CGGTAACGATAGCTTCCGAAGCTGATCCTTGGATGACACCACCACCATGAGTCGAAGACAAAATAACAGTCTGGGAGATTGAGAAGCTTGGCCAG  
CCAATCCATTACAACCGTCTCCAATTTCTGTACAGCAGGGGAGCAGATCCAATTTGAAAGCCGGAGCTGTGAAAGCTGCTGAGTATAATTTCTCCA  
AGCATTCAGGGTAGGTAGATGATGCAGGGAAGAACGCCATGAAATTAGGTGATTGCCCTTG

>Bcin09g03030 (MLST4), partial sequence [organism=Botrytis sinoviticola, strain GB5\_5]

AAGAAGGACTGGCAGAGAGAGTTTTGGAGGAGGTTGCAAAGAGTTGGAAGAATCGGAGTGGCGGTGTTATTGTCGAGGGCGAGGGGACGGAATT  
GAAGGAGATTCTGAAAGCTTTGAAAGGAATATGAGTGGTGGAAAGGATAGTCGTAGGAAGAGAAATTAAGCCGGCAGAACAGTTTAGTACTGGGG  
TCATCACAATATGGAGAGGTCAATCATAACGAGACTTGGACTACGGCCTGGGAATATACCTAGAGAGGATAGTCAGTCAAGTTTGGGGATGTCAA  
CATTGGAGGTTAATGACGAGGAAGATGAGGATGGCCTGCTGGATCCAAGGAAATGGTTAAAAGTCAATTGATGCTTTTCGAGCAACCTCGACTGGT  
GTATAACGTTCCTAAGAAGCACTTTGATAGGTATGTTTCAATGATACCATCCATCTGAATCGACTAATGCAGTACAGAGATACCTCAAAGCCT  
TCATTATTCCACCTGCGTCCATAAAAACACTCCTCTTCCAAAACCGCTATAATGTTATCCATCAACGTCTCTTCGCAATGAATCTTTTCAA  
CGCCAGCTTTTCAAGGTGGCAAAGCTTCCCTTCAACGCAGCACGTCCGCTATTACCACCCAACAACAATCATACAAATTAACGCCGATAGCTAA  
TCTTCTCGGCCCAATCGCAGCTCTCATATGCTTCTTGGCCTCCTCAGTATTTTCGCTACTGGTACCCTCGCCATTAATGACCTG

>Bcin11g01310 (MLST5), partial sequence [organism=Botrytis sinoviticola, strain GB5\_5]  
TCATGTGGAACCGGCGTAGAATGCGCAACGCTTGAAGTTCCGCTCGAATATGGCGATGCGAAGTCAACAGCAAAAGCCAGTGTGCGCTTGCTC  
GTTATCCTGCCACTGTTGCCCGCAGCAAGAAGCTCGGGTCTCTTGTATAAATCCCGTGGACCCGGTGCCAGTGGTGTGGCTTTGTGCAGTC  
TGGAGCCGGTGGCGGGTGTCAACACTGAGTGGTGGATTATACGATATCATCGATGGGATCCACGTGGAACGGTGTTCGGCTCCTATTTTA  
GAATGCTTTCCAAATGCCAGTGCAGGAGTATAATTTTAAACAACGCATTTCCATCTGCTCCGAACCTCTGGCTCGGACAATTTGCGAATGCCAGCG  
CCAATTCGCTGTTAGCTCTGCTATCACATCTTTTGACACTTCTGTGCTGCTCTTGCAAAAGCTTGTGTAGCTCAGAAATCTCCGCTCTTTA  
CACATCAACAGCAGCATATGTTGCTCGAGACATGGCAGCGATAGTTGATGCATTGGATGGAACCTCTGCAAACTCAACTACTGGGGTTTCTCA  
TATGAACTATTTTCTTGGCAGTTTATCCAACTTTCCAGGCCGCGTGGGAAGAGTTCTTGCCGATGGTGTTTTTTGACGCAAAGGCAAATG  
CCCTTACATACGTCAGCCAACCTTCCAAACGATCAACTCAGTGTTCGTGCTTCATTGAATGATTTTTTCAGCTTTCTGCACCACCGCCGGCAGTAA  
AGGTTGCTCTTTTGGCACCCTCTGCTGGAATCACAGGTACTGTTGCCACCAGACTTGACAACATAATGAAGGATAT

>Bcin15g03910 (MLST6), partial sequence [organism=Botrytis sinoviticola, strain GB5\_5]  
TCTTTGAAAGCCTTTTCTAGCATCTCCTCCCCCTAACGTCATATGACCCCTGGAAATGGTTTCGAAAATAAATTTCCGGCTCATCCAATGTC  
TTCAGACCTAGCCAATCTTCTTTATAAATGGCTCTTCTTTCAGTGGTGTAACTTCCGTGCCGTTGACTTCAGCCACCATCCACTTTCTTAG  
GAATGACGGTTGTGTCGTCTTCAAAGACGTACATTACGAATCGTTCCAATTTTTCCATGTTGGACTTATATGTTTCGTTCTTGAGAACGCGCTC  
GTTATTAATGTGCGCGAGGAAATTTGGAATATTTCAAGGTAAGAGTCTAGGTTTTTCAGGATCTCTGAAGTATTGAGCGGGTACGAGACGAGATTGG  
ACAAATGTTGACCAGGTGTTGGATCGCAAAAGGGTTTGAGCACCGCGACAGAGGAAATCGGTAGGACCACAGGCTTGGAAAGGCAGAAATACCGT  
TGTGTTGGGAACCGAAGGTCAGGAGAGAGCGGATGGGTGGAGAATTCAGCGGGATATGTAACCGCGCAAGAATTTGGCCGCCCTGGGAGAATCC  
AATTGCATCGACGGCGGGCGGGTAGAAAGGATAGGATGGGAGGCGAGGCTTTCGACAGCTTTTCGATTTGGACTTGGTAAGAGAGTTAGTAT  
GTCGTTTGAAGGAAAAGCTAGGGGATGTACTCACGAGTGAGATTTCCGAAGAAGGTAGCTGTCTATCTGCAGATGCATCCTCATCTACATGAAT  
ATTATAGACGAAAAGTCCCGGGATGAATAGCTTCAGCTAATTTCTCCAACCTGCGCAAGACCATCCGCTTTGTAATTATCGCCGAGTCCATGCCAG  
ATAATCAAGGGTAGTGGAGTATCA

>Bcin16g03460 (MLST7), partial sequence [organism=Botrytis sinoviticola, strain GB5\_5]  
TCTTCATGAACCTCTTAATTTGAACTCTTCATTAATTGCAAGTATGAACCCCTATTTTGGCCAGAAGATAGTTACAAGACGTATATCATTAGT  
CGAGAACCCTCATGATATATATTGAAGGTTTTTTGAAAGCGAATGAAAGCAAACATTTGGTTGGTGTAGGTATGTTATTTATCTGGTGA  
TGAACAGAAGAACTGATAAGAAAAGTGAACCGCTTTATGAACCGTCTACTGTTTCTCATGGACAGGAAGTTACTATTGATACTTCGGTTCGACA  
TTCTGAAGTAGCGGTGTTAGAGAGGGATGAGGTGGTCAAGTGTATTGAGCATAGAGCGAGGGCATTTTCAGGGGTGGAGGGGTGAGATGGGGATT  
GAGAAGTTGAGGACGCAGAGGTATGGGGTTGGAGGACATTATGGGATGCATTTGTAAGTCTTGGGAGATTGACGAAGTCTTTTGTATTATTTCT  
ATCAACTCGCATCTTTACAAAGAAAAATCATGAATACGAGGGCTAATGTCTAGGAAATAGCGATTGGAGCGGAGGCAAACGTGGCATAGACCGA  
TTCAGTACTTTTCATGGTCTATGTGCGAGTATCCTCTGATATCGAAGGTGGAGGAACGGAAATCCCACGTATTGTGGGACCAAAGGAGGAAAGT  
GGGAGGAATTCCTGGATACTACCGAAGAATTAGATCCAAGAACTGGAAAAAATGTAACAGTTGAAGGGGTGACATTCAAACCTATCAAGGGAAA  
TGCCGTATTCT

>Bcin12g03020 (MLST8), partial sequence [organism=Botrytis sinoviticola, strain GB5\_5]  
AAGCACGAATAAACCATCGCAAGAGAAATATTTCTTGAACCACAACATGACACGAGCGGGAAGAGTATATCGGGCGAGGAGCTTCATCCAGA  
GCACCAAAGCGACAACGAGTCGATGATAATTACAACCTTACGGTGGAAAGAAATGAAAATACAGCAGCTTATGCTTCCGAAAGCTTCCATCTG  
GAAGTATAAATGTTGGTGGGGGCGAGGAAGACCACTTTTCAAGAAGAACCTAGAACGGCATTTGTGCTGGCAAGTTGCCCTTGGAAAGCATCAA  
CATCGGTGGAAAGAAGGCTACCCAAATCGAGGACGAGGGTAGAGCGGCTTATGCTTCCAGAAAATTGCCCCAGGAAGTATAAACTCTGGCGCA  
AAGAAGGCCACTTCATTCCAGGATGAAACGAGACCGGCTATGTCTCGGAAAGCTCCCACATGGTAGTATCGACGGTATGCGAAACCGTGAAA  
TGGCTGCTGTCCATCGCGAAATTTGCTGAGGGTGGGAGGAAGCCAGGCCAGGTTGTCTGCTCTATTCACATTCATCCACTTCAAAGAAAAC  
TTTCGATGAACCTGAAGAACAAGCCGAACCGACAAAAACATCCAATGCGCCTTTAACAGAGGAAATGGCAACATTCACCAATTTAGGATTTATCG  
AGAAGGCTTGCAGCCCATCTATCGACTAAACTCGATATGAAAGCTCCAACCGCCATTCAAAAAGCATCTGTGCAGCAGTTGATATCGGACGATA  
GCGATGCTTTATACAAGCAGAGACTGGATCTGAAAAACCTTAGCATATCTACTACCTATAGTTGAGCGAATATTAGCATTGAGTGAGA

>Bcin02g07770 (MLST9), partial sequence [organism=Botrytis sinoviticola, strain GB5\_5]  
CGATTCCGATGCCGTGTAGGATTTGCCGAAACTGTTCCAGTGGGACGGTAGGAACAGTTTATGAGGCATATAACCATCTTCAAAGTCGTAAA  
TGGATGCGTACCATTCCCTGCCGTCGATGCATCGGGTAACACAGGGTATGTCCTTATATCTTTCTCTTCCACACGATTGCTACCGAGTCTCTA

ACATATTTTAGTGGTGGTTTGTCCACCAACTGGCAGTAGCAACGGTGGTTGCAGCAGCAGTACCGGTCAAGTATATGTCAGAGGAGCACAAAGCG  
GATCAAACACTACGCTATCATGTACTCCTGGTAAGTTCTCTCTAAACTTCTCCTTATAAATCCAATCTAACAAAAATCTTAGGTACATGCCAAAAGA  
CGAGCCCTCAACCGGTATTGGTCCCGTACCGATGGGAAGGTGTAATCGTCTGGCTCTCCAGCGCCACCGCCACGACTGCCGACAATATCTTA  
GCTGTGTGTCCCTCCGCCACGGAGGCTGGGATTGTTCCACCGATGGTTATTCCCTTTCTGGTACTAGCCCTCTTATCAAGTACGAGAGTGTCT  
GGCCCGTCGATCATTCAATGGGTCTCACTAGTACTGTTGGTGGACAACAACCTATGATTGCTTGGGAGTCTTTACCTACTGCTGCTCAAACCTGC  
TCTTGAGAACTGATTTCCGGTGTGCGAATGTTCCATTCATTCAGCTGTTTTTCACAGACAATCTTGCAAAGGCTACTTTTTTAG

>Bcin04g02090 (MLST10), partial sequence [organism=Botrytis sinoviticola, strain GB5\_5]

ACTCTCGAACATGACTATGAATGATGTTTACAAGCCCTACATCCATGTAAGAAATGTAGAATGGAGATATCAGTAACTGTAACATAATGTCGTTT  
GTAGGCTTTCAAATTACTTACGCAGTTCAACCCAATCACTACAGCTATTGCCGAATCCCCACTATTTCAAATGGCTGTCTCAGCAAATACCATC  
GAAAAGTACACACTGCTAGGCCCTTTCTTCAGAAATATCTCCTCTGCAACAGGAAGTTACCAGGGAACTTTCAGTGCACCAAAGACGATAGATA  
GGCGACATATTGCCACATCTCAAGATGCTTTACGATTGACCTTACAAACCCATCAAAAAGATTTACTTGATATCATCAACCCTTTGTTTCGAGC  
AAGTCCAATTGCCAAAAGCAAAACCTTGGATTGGTTCGCCTACATTGTGAATCAAAATCACAAGCGCCGAGCACTTCAGGTAGACCCGAAAGAA  
GTATCTTCTGATGGTTTCATGCATAATGTCAGTGTCTGTTCTAGATGGTCTTTGTGAGCCATTCATGGATACCACATTTCTCAAAGATTTTCAAGA  
TTGATATTGATTATCTAAGACGTGCGCCTCGTGTAGATATCAAGGACGAGACCAAGCTGAACGCTGATGAGAAGGCTTCCGAGAAGTATTATGA  
GGACACTGTTCTTGGCACTTCTAATTTTCATCTCTGAGGTCTTCTTTCTGACATTGGCTGCTCATCATTATGGTAGTGAAGCTCTTAATGCCACG  
CATAAGAGTCTGGAGAAAGACATCAAATATATTTCAAAGCAATTGACTGCCGTTGAAGCAG
